# Supplementary material for: Neoantigen load and HLA-class I expression identify a subgroup of tumors with a T-cell-inflamed phenotype and favorable prognosis in homologous recombination-proficient high-grade serous ovarian carcinoma
Source: PubMed Central journal article supplement — J Immunother Cancer. 2020 May 26;8(1):e000375. doi: 10.1136/jitc-2019-000375 (PMC7254153; doi:10.1136/jitc-2019-000375), 2020-05-26
Supplement: jitc-2019-000375supp001.pdf [file jitc-2019-000375supp001.pdf]

Supplementary Table S1. Summary of HLA typing, mutations/neoantigens and prognosis in 80 HGSC patients

| ID    | HLA-A | HLA-B | HLA-C | No. of non-synonymous mutations <sup>a</sup> | No. of predicted neoAg <sup>b</sup> | PFS   | rec. (1) or no rec. (0) | OS | dead (1) or alive (0) |   |       |   |
|-------|-------|-------|-------|----------------------------------------------|-------------------------------------|-------|-------------------------|----|-----------------------|---|-------|---|
| Se001 | 24:02 | 33:03 | 44:03 | 52:01                                        | 12:02                               | 14:03 | 105                     | 37 | 58.6                  | 0 | 58.6  | 0 |
| Se004 | 31:01 | 33:03 | 40:02 | 44:03                                        | 03:04                               | 14:03 | 166                     | 74 | 14.3                  | 1 | 38.0  | 1 |
| Se005 | 24:02 | 33:03 | 44:03 | 46:01                                        | 01:02                               | 14:03 | 72                      | 22 | 55.3                  | 0 | 55.3  | 0 |
| Se006 | 11:01 | 11:01 | 51:01 | 55:02                                        | 01:02                               | 15:02 | 141                     | 37 | 23.3                  | 1 | 95.4  | 0 |
| Se008 | 02:01 | 26:01 | 13:01 | 54:01                                        | 01:02                               | 03:04 | 69                      | 14 | 67.6                  | 1 | 119.3 | 0 |
| Se011 | 24:02 | 33:03 | 40:02 | 44:03                                        | 07:02                               | 14:03 | 84                      | 25 | 43.0                  | 1 | 71.9  | 1 |
| Se015 | 02:01 | 24:02 | 07:02 | 55:02                                        | 01:02                               | 07:02 | 123                     | 37 | 81.0                  | 1 | 95.6  | 0 |
| Se016 | 11:01 | 11:01 | 48:01 | 67:01                                        | 07:02                               | 08:01 | 77                      | 20 | 96.1                  | 0 | 96.1  | 0 |
| Se020 | 24:11 | 31:01 | 07:02 | 40:02                                        | 03:04                               | 07:02 | 171                     | 57 | 29.8                  | 1 | 70.2  | 1 |
| Se023 | 02:06 | 24:02 | 40:02 | 55:02                                        | 03:03                               | 03:03 | 144                     | 41 | 21.3                  | 1 | 46.7  | 1 |
| Se024 | 02:06 | 24:02 | 52:01 | 54:01                                        | 08:01                               | 12:02 | 40                      | 18 | 15.1                  | 1 | 59.5  | 1 |
| Se025 | 24:02 | 24:02 | 40:01 | 52:01                                        | 03:04                               | 12:02 | 56                      | 11 | 72.6                  | 0 | 72.6  | 0 |
| Se026 | 24:02 | 26:02 | 15:01 | 40:06                                        | 03:04                               | 15:02 | 57                      | 26 | 22.2                  | 1 | 47.0  | 1 |
| Se029 | 02:06 | 24:02 | 51:01 | 52:01                                        | 12:02                               | 14:02 | 9                       | 2  | 35.7                  | 1 | 55.0  | 0 |
| Se032 | 02:07 | 02:19 | 15:01 | 44:03                                        | 08:03                               | 14:03 | 51                      | 17 | 5.6                   | 1 | 63.7  | 0 |
| Se034 | 26:01 | 33:03 | 39:01 | 44:03                                        | 07:02                               | 14:03 | 105                     | 31 | 10.7                  | 1 | 47.4  | 1 |
| Se035 | 26:01 | 31:01 | 35:01 | 51:01                                        | 03:03                               | 14:02 | 86                      | 26 | 12.6                  | 1 | 56.4  | 1 |
| Se037 | 24:02 | 24:02 | 40:02 | 52:01                                        | 01:02                               | 12:02 | 115                     | 31 | 47.3                  | 1 | 57.4  | 0 |
| Se039 | 02:06 | 02:19 | 40:02 | 55:02                                        | 01:02                               | 07:02 | 221                     | 69 | 53.2                  | 0 | 53.2  | 0 |
| Se043 | 24:02 | 33:03 | 44:03 | 52:01                                        | 12:02                               | 14:03 | 46                      | 11 | 18.3                  | 1 | 53.0  | 1 |
| Se044 | 24:02 | 31:01 | 40:02 | 52:01                                        | 03:04                               | 12:02 | 68                      | 22 | 49.0                  | 1 | 113.8 | 0 |
| Se047 | 26:03 | 26:03 | 52:01 | 52:01                                        | 12:02                               | 12:02 | 157                     | 19 | 89.6                  | 0 | 89.6  | 0 |
| Se048 | 02:01 | 31:01 | 51:01 | 56:01                                        | 01:02                               | 04:01 | 33                      | 12 | 22.1                  | 1 | 63.0  | 1 |
| Se049 | 24:02 | 24:02 | 15:01 | 40:02                                        | 03:04                               | 04:01 | 37                      | 14 | 12.9                  | 1 | 35.2  | 1 |
| Se050 | 24:02 | 24:02 | 07:02 | 40:01                                        | 03:04                               | 07:02 | 92                      | 30 | 13.3                  | 1 | 39.3  | 0 |
| Se051 | 24:02 | 26:01 | 07:02 | 40:02                                        | 03:04                               | 07:02 | 87                      | 33 | 19.3                  | 1 | 39.4  | 0 |
| Se054 | 24:02 | 33:03 | 44:03 | 51:01                                        | 14:02                               | 14:03 | 72                      | 22 | 11.4                  | 1 | 36.2  | 0 |
| Se059 | 31:01 | 31:01 | 39:02 | 40:02                                        | 03:04                               | 07:02 | 76                      | 30 | 126.3                 | 0 | 126.3 | 0 |
| Se060 | 24:02 | 24:02 | 07:02 | 52:01                                        | 07:02                               | 12:02 | 143                     | 25 | 18.3                  | 1 | 205.4 | 0 |
| Se067 | 02:06 | 24:02 | 40:06 | 52:01                                        | 08:01                               | 12:02 | 55                      | 16 | 12.0                  | 1 | 16.3  | 1 |
| Se068 | 24:20 | 31:01 | 15:01 | 51:01                                        | 03:03                               | 14:02 | 48                      | 15 | 20.2                  | 0 | 20.2  | 0 |
| Se071 | 03:21 | 31:01 | 40:06 | 51:01                                        | 01:02                               | 08:01 | 66                      | 12 | 12.6                  | 1 | 15.5  | 1 |
| Se101 | 24:02 | 31:01 | 46:01 | 51:01                                        | 01:03                               | 14:02 | 76                      | 14 | 20.1                  | 1 | 51.5  | 0 |
| Se102 | 11:01 | 33:03 | 15:01 | 44:03                                        | 04:01                               | 14:03 | 88                      | 40 | 37.0                  | 0 | 45.3  | 0 |
| Se103 | 11:01 | 33:03 | 40:06 | 44:03                                        | 08:01                               | 14:03 | 24                      | 7  | 25.3                  | 1 | 44.8  | 1 |
| Se104 | 24:02 | 24:02 | 07:02 | 52:01                                        | 07:02                               | 12:02 | 28                      | 7  | 8.3                   | 1 | 46.5  | 0 |
| Se105 | 24:02 | 24:02 | 40:06 | 52:01                                        | 12:02                               | 14:02 | 39                      | 8  | 33.7                  | 0 | 21.5  | 0 |
| Se108 | 02:01 | 11:01 | 40:01 | 67:01                                        | 07:02                               | 15:02 | 95                      | 38 | 14.6                  | 1 | 28.3  | 0 |
| Se109 | 24:02 | 26:01 | 40:01 | 40:01                                        | 03:04                               | 07:02 | 55                      | 10 | 37.0                  | 0 | 75.6  | 0 |
| Se110 | 24:02 | 24:02 | 46:01 | 52:01                                        | 01:02                               | 12:02 | 81                      | 6  | 21.5                  | 1 | 74.7  | 0 |
| Se111 | 02:01 | 26:02 | 15:01 | 40:06                                        | 07:02                               | 08:01 | 81                      | 17 | 15.2                  | 1 | 28.8  | 1 |
| Se112 | 11:01 | 33:03 | 35:01 | 44:03                                        | 08:01                               | 14:03 | 118                     | 45 | 26.7                  | 1 | 56.8  | 1 |
| Se113 | 24:02 | 33:03 | 40:06 | 58:01                                        | 03:04                               | 03:03 | 43                      | 10 | 28.7                  | 1 | 72    | 0 |
| Se114 | 02:01 | 24:02 | 46:01 | 54:01                                        | 01:02                               | 01:02 | 95                      | 22 | 17.3                  | 1 | 70.4  | 0 |
| Se115 | 24:02 | 26:01 | 07:02 | 55:02                                        | 01:02                               | 07:02 | 109                     | 25 | 20.4                  | 1 | 62.5  | 1 |
| Se116 | 02:01 | 11:01 | 40:02 | 51:01                                        | 01:02                               | 03:04 | 61                      | 31 | 6.7                   | 1 | 8.3   | 1 |
| Se117 | 24:02 | 24:02 | 40:06 | 40:06                                        | 15:02                               | 15:02 | 122                     | 21 | 40.3                  | 1 | 68.7  | 0 |
| Se118 | 11:01 | 26:01 | 40:06 | 54:01                                        | 01:02                               | 03:04 | 94                      | 36 | 12.4                  | 1 | 53    | 1 |
| Se119 | 02:06 | 24:02 | 35:01 | 40:02                                        | 03:03                               | 03:04 | 52                      | 19 | 28.1                  | 1 | 50.7  | 0 |
| Se120 | 24:02 | 26:01 | 35:01 | 40:06                                        | 03:03                               | 08:01 | 116                     | 29 | 20.5                  | 1 | 37    | 1 |
| Se121 | 11:01 | 31:01 | 15:01 | 40:02                                        | 03:04                               | 04:01 | 25                      | 16 | 23.5                  | 1 | 48.8  | 1 |
| Se122 | 02:06 | 02:13 | 15:18 | 59:01                                        | 01:02                               | 07:04 | 56                      | 10 | 22.0                  | 1 | 64.8  | 1 |
| Se123 | 24:02 | 24:02 | 15:18 | 40:02                                        | 03:04                               | 07:04 | 142                     | 50 | 38.8                  | 1 | 62.9  | 0 |
| Se124 | 24:02 | 24:02 | 40:02 | 52:01                                        | 03:04                               | 12:02 | 83                      | 20 | 30.4                  | 1 | 48.8  | 1 |
| Se125 | 02:01 | 11:01 | 15:01 | 15:01                                        | 04:01                               | 04:01 | 93                      | 27 | 22.9                  | 1 | 45.1  | 1 |
| Se126 | 26:03 | 31:01 | 51:01 | 51:01                                        | 14:02                               | 14:02 | 33                      | 11 | 29.7                  | 1 | 60.7  | 1 |
| Se127 | 02:07 | 26:01 | 46:01 | 48:01                                        | 01:02                               | 08:01 | 119                     | 11 | 41.3                  | 1 | 57    | 0 |
| Se128 | 26:03 | 33:03 | 15:01 | 58:01                                        | 03:02                               | 03:03 | 33                      | 14 | 12.2                  | 1 | 16.7  | 1 |
| Se129 | 11:01 | 24:02 | 35:01 | 78:02                                        | 03:03                               | 12:02 | 62                      | 23 | 18.4                  | 1 | 47.3  | 1 |
| Se130 | 11:01 | 24:02 | 52:01 | 55:02                                        | 01:02                               | 12:02 | 99                      | 31 | 16.1                  | 1 | 25.4  | 1 |
| Se131 | 24:02 | 24:08 | 46:01 | 52:01                                        | 01:02                               | 12:02 | 121                     | 19 | 41.1                  | 1 | 45.6  | 1 |
| Se132 | 02:06 | 02:06 | ND    | 03:04                                        | 08:22                               |       | 286                     | 74 | 20.1                  | 1 | 54.4  | 0 |
| Se133 | 02:06 | 33:03 | 15:18 | 51:01                                        | 08:01                               | 14:02 | 44                      | 15 | 16.5                  | 1 | 22.6  | 1 |
| Se134 | 24:02 | 31:01 | 40:01 | 44:03                                        | 03:03                               | 14:03 | 92                      | 35 | 13.7                  | 1 | 50.4  | 0 |
| Se135 | 24:02 | 24:02 | 52:01 | 52:01                                        | 12:02                               | 12:02 | 148                     | 22 | 27.3                  | 1 | 45.5  | 0 |
| Se136 | 11:01 | 24:02 | 40:01 | 67:01                                        | 03:04                               | 07:02 | 41                      | 12 | 8.2                   | 1 | 21.3  | 1 |
| Se137 | 11:01 | 26:01 | 35:01 | 54:01                                        | ND                                  |       | 134                     | 34 | 30.9                  | 1 | 43.5  | 0 |
| Se138 | 24:02 | 33:03 | 44:03 | 52:01                                        | 12:02                               | 14:03 | 135                     | 45 | 18.1                  | 1 | 45.2  | 0 |
| Se139 | 26:01 | 33:03 | 40:06 | 44:03                                        | 03:04                               | 14:03 | 86                      | 41 | 5.2                   | 1 | 12.6  | 1 |
| Se140 | 02:07 | 31:01 | 46:01 | 51:01                                        | 01:02                               | 14:02 | 51                      | 15 | 17.1                  | 1 | 34.1  | 1 |
| Se141 | 02:01 | 24:02 | 15:01 | 40:06                                        | 04:01                               | 08:01 | 111                     | 31 | 8.3                   | 1 | 28.3  | 1 |
| Se142 | 02:06 | 33:03 | 44:03 | 51:01                                        | 01:02                               | 14:03 | 50                      | 18 | 14.9                  | 1 | 22.1  | 1 |
| Se143 | 02:89 | 26:01 | 40:02 | 51:01                                        | 03:04                               | 14:02 | 102                     | 40 | 18.7                  | 1 | 41.2  | 0 |
| Se144 | 02:01 | 02:06 | 15:01 | 54:01                                        | 01:02                               | 03:03 | 70                      | 26 | 10.6                  | 1 | 24.5  | 1 |
| Se145 | 02:06 | 24:02 | 54:01 | 59:01                                        | 01:02                               | 01:02 | 126                     | 32 | 3.7                   | 1 | 22.4  | 0 |
| Se146 | 24:02 | 31:01 | 15:18 | 52:01                                        | 08:01                               | 12:02 | 26                      | 5  | 8.2                   | 1 | 20.6  | 1 |
| Se147 | 24:02 | 24:02 | 39:01 | 54:01                                        | 01:02                               | 07:02 | 113                     | 21 | 8.5                   | 1 | 22.8  | 0 |
| Se150 | 24:02 | 26:01 | 15:01 | 40:01                                        | 04:01                               | 04:82 | 122                     | 32 | 20.1                  | 0 | 20.1  | 0 |
| Se151 | 24:02 | 24:02 | 54:01 | 59:01                                        | 01:02                               | 01:02 | 13                      | 1  | 2.7                   | 1 | 7.0   | 1 |
| Se152 | 24:02 | 31:01 | 40:01 | 51:01                                        | 03:04                               | 14:02 | 41                      | 19 | 13.9                  | 0 | 17.8  | 0 |

<sup>a</sup>Non-synonymous mutations include missense, insertion/deletion and non-stop mutations.

<sup>b</sup>The number of antigenic mutations potentially generating one or more neopeptides derived from non-synonymous mutations in genes with FPKM value  $\geq 1$ .  
ND, not determined
