# Supplementary material for: Neoantigen load and HLA-class I expression identify a subgroup of tumors with a T-cell-inflamed phenotype and favorable prognosis in homologous recombination-proficient high-grade serous ovarian carcinoma
Source: PubMed Central journal article supplement — J Immunother Cancer. 2020 May 26;8(1):e000375. doi: 10.1136/jitc-2019-000375 (PMC7254153; doi:10.1136/jitc-2019-000375), 2020-05-26
Supplement: jitc-2019-000375supp002.pdf [file jitc-2019-000375supp002.pdf]

Supplementary Table S2 Neopeptides from missense mutations in 80 HGSC patients

| Patient ID | Variant ID    | HLA allele  | MT | Sequence (MT) | IC <sub>50</sub> (nM) | WT | Sequence (WT) | IC <sub>50</sub> (nM) | Length | FPKM      |
|------------|---------------|-------------|----|---------------|-----------------------|----|---------------|-----------------------|--------|-----------|
| Se001      | ST3GAL3 V7L   | HLA-C*14:03 | MT | F[L]RNLLAL    | 121.05                | WT | F[V]RNLLAL    | 105.55                | 9      | 4.8926    |
| Se001      | ST3GAL3 V7L   | HLA-C*14:03 | MT | VF[L]RNLLAL   | 132.84                | WT | VF[V]RNLLAL   | 142.68                | 10     | 4.8926    |
| Se001      | ST3GAL3 V7L   | HLA-C*12:02 | MT | F[L]RNLLAL    | 382.78                | WT | F[V]RNLLAL    | 82.34                 | 9      | 4.8926    |
| Se001      | KIF2C V31I    | HLA-C*12:02 | MT | HSAN[I]RTVNL  | 304.18                | WT | HSAN[V]RTVNL  | 287.74                | 10     | 25.63481  |
| Se001      | KIF2C V31I    | HLA-C*12:02 | MT | SAN[I]RTVNL   | 358.11                | WT | SAN[V]RTVNL   | 197.72                | 9      | 25.63481  |
| Se001      | KIF2C V31I    | HLA-C*12:02 | MT | LIHSAN[I]RTV  | 499.36                | WT | LIHSAN[V]RTV  | 492.57                | 10     | 25.63481  |
| Se001      | COL11A1 E307D | HLA-B*44:03 | MT | EEYLTG[D]DY   | 138.02                | WT | EEYLTG[E]DY   | 80.84                 | 9      | 2.73431   |
| Se001      | GDAP2 I195M   | HLA-A*24:02 | MT | RFLE[M]HGETI  | 91.15                 | WT | RFLE[I]HGETI  | 82.6                  | 10     | 2.31189   |
| Se001      | GDAP2 I195M   | HLA-C*12:02 | MT | RTVRRFLE[M]   | 146.92                | WT | RTVRRFLE[I]   | 656.04                | 9      | 2.31189   |
| Se001      | GDAP2 I195M   | HLA-C*14:03 | MT | RFLE[M]HGETI  | 244                   | WT | RFLE[I]HGETI  | 474.56                | 10     | 2.31189   |
| Se001      | GDAP2 I195M   | HLA-C*14:03 | MT | RTVRRFLE[M]   | 326.22                | WT | RTVRRFLE[I]   | 1411.9                | 9      | 2.31189   |
| Se001      | DENND4B H476N | HLA-C*12:02 | MT | FIVGI[N]SSYF  | 65.42                 | WT | FIVGI[H]SSYF  | 55.03                 | 10     | 9.72851   |
| Se001      | DENND4B H476N | HLA-C*14:03 | MT | FIVGI[N]SSYF  | 242.18                | WT | FIVGI[H]SSYF  | 277.65                | 10     | 9.72851   |
| Se001      | DENND4B H476N | HLA-C*12:02 | MT | FIVGI[N]SSY   | 250.47                | WT | FIVGI[H]SSY   | 145.18                | 9      | 9.72851   |
| Se001      | SLAMF8 R46H   | HLA-B*44:03 | MT | [H]EAIWRSWL   | 17.65                 | WT | [R]EAIWRSWL   | 30.43                 | 9      | 12.65726  |
| Se001      | PCNXL2 K1776M | HLA-A*33:03 | MT | SFKV[I]VKNK   | 317.63                | WT | SFKV[K]VKNK   | 440.97                | 9      | 3.29893   |
| Se001      | PCNXL2 K1776M | HLA-A*33:03 | MT | I[M]VKNKECVR  | 483.26                | WT | I[K]VKNKECVR  | 19880.39              | 9      | 3.29893   |
| Se001      | CEBPZ G489S   | HLA-A*33:03 | MT | SALLT[S]VNR   | 156.99                | WT | SALLT[G]VNR   | 203.87                | 9      | 23.75264  |
| Se001      | CEBPZ G489S   | HLA-A*33:03 | MT | LSALLT[S]VNR  | 236.95                | WT | LSALLT[G]VNR  | 353.83                | 10     | 23.75264  |
| Se001      | CEBPZ G489S   | HLA-C*12:02 | MT | LT[S]VNRA YPY | 317.47                | WT | LT[G]VNRA YPY | 2106.78               | 10     | 23.75264  |
| Se001      | CEBPZ G489S   | HLA-C*12:02 | MT | T[S]VNRA YPY  | 349.77                | WT | T[G]VNRA YPY  | 3505.18               | 9      | 23.75264  |
| Se001      | CEBPZ G489S   | HLA-C*12:02 | MT | MLSALLT[S]V   | 426.02                | WT | MLSALLT[G]V   | 1094.12               | 9      | 23.75264  |
| Se001      | P4HTM D153H   | HLA-B*44:03 | MT | FEIPGFLT[H]   | 477.79                | WT | FEIPGFLT[D]   | 4151.92               | 9      | 23.81771  |
| Se001      | ATP11B F859L  | HLA-C*12:02 | MT | YAIARFK[L]JL  | 38.25                 | WT | YAIARFK[F]L   | 51.19                 | 9      | 9.99707   |
| Se001      | ATP11B F859L  | HLA-C*14:03 | MT | YAIARFK[L]JL  | 103.2                 | WT | YAIARFK[F]L   | 202.98                | 9      | 9.99707   |
| Se001      | ATP11B F859L  | HLA-A*24:02 | MT | RFK[L]LSKLLF  | 134.51                | WT | RFK[F]LSKLLF  | 62.43                 | 10     | 9.99707   |
| Se001      | ATP11B F859L  | HLA-C*14:03 | MT | RFK[L]LSKLL   | 360.59                | WT | RFK[F]LSKLL   | 223.35                | 9      | 9.99707   |
| Se001      | E1F4G1 K447N  | HLA-A*33:03 | MT | D[N]ANKTPLR   | 279.68                | WT | D[K]ANKTPLR   | 4597.56               | 9      | 116.99694 |
| Se001      | SH3TC1 K731N  | HLA-A*33:03 | MT | CV[K]VASLRTR  | 180.51                | WT | CV[K]VASLRTR  | 113.83                | 10     | 3.47728   |
| Se001      | SH3TC1 K731N  | HLA-A*33:03 | MT | LSCV[N]VASLR  | 345.46                | WT | LSCV[K]VASLR  | 303.76                | 10     | 3.47728   |
| Se001      | SH3TC1 K731N  | HLA-A*33:03 | MT | SCV[N]VASLR   | 379.88                | WT | SCV[K]VASLR   | 540.33                | 9      | 3.47728   |
| Se001      | ZMAT2 R116C   | HLA-C*12:02 | MT | MSMRVE[C]STL  | 221.6                 | WT | MSMRVE[R]STL  | 168.48                | 10     | 68.05125  |
| Se001      | ZMAT2 R116C   | HLA-C*14:03 | MT | SMRVE[C]STL   | 380.12                | WT | SMRVE[R]STL   | 265.28                | 9      | 68.05125  |
| Se001      | TMEM63B L423R | HLA-A*33:03 | MT | NIYWEH[R]SIR  | 27.62                 | WT | NIYWEH[L]SIR  | 40.31                 | 10     | 16.8457   |
| Se001      | TMEM63B L423R | HLA-A*33:03 | MT | IYWEH[R]SIR   | 35.78                 | WT | IYWEH[L]SIR   | 103.58                | 9      | 16.8457   |
| Se001      | TMEM63B L423R | HLA-B*44:03 | MT | WEH[R]SIRGF   | 79.87                 | WT | WEH[L]SIRGF   | 108.57                | 9      | 16.8457   |
| Se001      | TMEM63B L423R | HLA-C*14:03 | MT | YWEH[R]SIRGF  | 110.84                | WT | YWEH[L]SIRGF  | 138.23                | 10     | 16.8457   |
| Se001      | TTI2 I33S     | HLA-A*33:03 | MT | FSK[S]LHCLAR  | 35.95                 | WT | FSK[I]LHCLAR  | 55.88                 | 10     | 3.52911   |
| Se001      | KCNB2 R496M   | HLA-C*14:03 | MT | RWKWA[M]KAL   | 80.21                 | WT | RWKWA[R]KAL   | 101.67                | 9      | 1.11286   |
| Se001      | KCNB2 R496M   | HLA-C*14:03 | MT | SRWKWA[M]KA   | 131.01                | WT | SRWKWA[R]KAL  | 111.97                | 10     | 1.11286   |
| Se001      | VAV2 S113P    | HLA-C*12:02 | MT | ISAV[P]RLSL   | 215.41                | WT | ISAV[S]RLSL   | 345.39                | 9      | 8.47802   |
| Se001      | VAV2 S113P    | HLA-A*33:03 | MT | FGKVISAV[P]R  | 230.91                | WT | FGKVISAV[S]R  | 415                   | 10     | 8.47802   |
| Se001      | SNAPC4 A1379P | HLA-C*14:03 | MT | FTLPALL[P]TL  | 61.97                 | WT | FTLPALL[A]TL  | 52.3                  | 10     | 6.46768   |
| Se001      | SNAPC4 A1379P | HLA-C*12:02 | MT | FTLPALL[P]TL  | 77.35                 | WT | FTLPALL[A]TL  | 37.42                 | 10     | 6.46768   |
| Se001      | SNAPC4 A1379P | HLA-C*14:03 | MT | TLPALL[P]TL   | 289.97                | WT | TLPALL[A]TL   | 264.15                | 9      | 6.46768   |
| Se001      | FANCF L192R   | HLA-A*33:03 | MT | RFLSS[R]WER   | 36.77                 | WT | RFLSS[L]WER   | 73.98                 | 9      | 2.54317   |
| Se001      | FANCF L192R   | HLA-A*24:02 | MT | RFLSS[R]WERL  | 111.83                | WT | RFLSS[L]WERL  | 55.78                 | 10     | 2.54317   |
| Se001      | FANCF L192R   | HLA-C*14:03 | MT | RFLSS[R]WERL  | 145.38                | WT | RFLSS[L]WERL  | 239.65                | 10     | 2.54317   |
| Se001      | FANCF L192R   | HLA-A*24:02 | MT | [R]WERLPQNNF  | 287.02                | WT | [L]WERLPQNNF  | 828.35                | 10     | 2.54317   |
| Se001      | FANCF L192R   | HLA-A*33:03 | MT | RPARFLSS[R]   | 363.41                | WT | RPARFLSS[L]   | 18361.83              | 9      | 2.54317   |
| Se001      | PLEKHB1 R21Q  | HLA-A*24:02 | MT | RWK[Q]NWFAL   | 18.44                 | WT | RWK[R]NWFALW  | 23.28                 | 10     | 5.02637   |
| Se001      | PLEKHB1 R21Q  | HLA-C*14:03 | MT | RWK[Q]NWFAL   | 52.48                 | WT | RWK[R]NWFAL   | 82.97                 | 9      | 5.02637   |
| Se001      | PLEKHB1 R21Q  | HLA-A*24:02 | MT | RWK[Q]NWFAL   | 67.87                 | WT | RWK[R]NWFAL   | 82.61                 | 9      | 5.02637   |
| Se001      | PLEKHB1 R21Q  | HLA-C*14:03 | MT | RRWK[Q]NWFAL  | 307.3                 | WT | RRWK[R]NWFAL  | 140.84                | 10     | 5.02637   |
| Se001      | GDPD5 D545E   | HLA-C*12:02 | MT | AAVRRTSR[E]V  | 421.12                | WT | AAVRRTSR[D]V  | 2128.34               | 10     | 1.69107   |
| Se001      | CHD8 A2231T   | HLA-C*12:02 | MT | S[T]VSTAAAQF  | 314.17                | WT | S[A]VSTAAAQF  | 229.08                | 10     | 10.14659  |
| Se001      | CHD8 A2231T   | HLA-C*12:02 | MT | MAEEEAS[T]V   | 498.84                | WT | MAEEEAS[A]V   | 636.3                 | 9      | 10.14659  |
| Se001      | PAK6 D88N     | HLA-A*24:02 | MT | GYISGLLN[N]I  | 42.14                 | WT | GYISGLLN[D]I  | 72.62                 | 10     | 3.55173   |
| Se001      | PAK6 D88N     | HLA-C*14:03 | MT | GYISGLLN[N]I  | 441.22                | WT | GYISGLLN[D]I  | 444.98                | 10     | 3.55173   |
| Se001      | ZNF106 S26G   | HLA-A*33:03 | MT | HMR[G]MLHHR   | 13.1                  | WT | HMR[S]MLHHR   | 9.34                  | 9      | 5.79401   |
| Se001      | ZNF106 S26G   | HLA-B*44:03 | MT | KEMDEHMR[G]   | 56.42                 | WT | KEMDEHMR[S]M  | 40.28                 | 10     | 5.79401   |
| Se001      | ZNF106 S26G   | HLA-C*14:03 | MT | R[G]MLHHREL   | 112.24                | WT | R[S]MLHHREL   | 75.75                 | 9      | 5.79401   |
| Se001      | ZNF106 S26G   | HLA-A*33:03 | MT | EHMR[G]MLHHR  | 218.56                | WT | EHMR[S]MLHHR  | 159.67                | 10     | 5.79401   |
| Se001      | ZNF106 S26G   | HLA-C*14:03 | MT | MR[G]MLHHREL  | 403.86                | WT | MR[S]MLHHREL  | 155.14                | 10     | 5.79401   |
| Se001      | KIF7 I1203K   | HLA-C*14:03 | MT | RYMW[K]NQEL   | 7.45                  | WT | RYMW[I]NQEL   | 7.14                  | 9      | 1.22908   |
| Se001      | KIF7 I1203K   | HLA-A*24:02 | MT | RYMW[K]NQEL   | 43.37                 | WT | RYMW[I]NQEL   | 9.88                  | 9      | 1.22908   |
| Se001      | KIF7 I1203K   | HLA-C*14:03 | MT | GRYMW[K]NQEL  | 329.75                | WT | GRYMW[I]NQEL  | 223.79                | 10     | 1.22908   |
| Se001      | EPOR S318I    | HLA-A*24:02 | MT | LWW[I]PCTPF   | 416.29                | WT | LWW[S]PCTPF   | 154.17                | 9      | 3.2699    |
| Se001      | ZNF100 K137T  | HLA-A*24:02 | MT | KYG[T]YGHNDL  | 262.25                | WT | KYG[K]YGHNDL  | 186.86                | 10     | 2.89783   |
| Se001      | PLAUR V17L    | HLA-A*33:03 | MT | C[L]PASWGLR   | 196.21                | WT | C[V]PASWGLR   | 80.05                 | 9      | 29.52336  |
| Se001      | PLAUR V17L    | HLA-A*33:03 | MT | TC[L]PASWGLR  | 345.58                | WT | TC[V]PASWGLR  | 433.87                | 10     | 29.52336  |
| Se001      | FIZ1 K49N     | HLA-A*33:03 | MT | TAL[N]PHACPR  | 32.71                 | WT | TAL[K]PHACPR  | 40.66                 | 10     | 2.89697   |
| Se001      | FIZ1 K49N     | HLA-A*33:03 | MT | AL[N]PHACPR   | 128.23                | WT | AL[K]PHACPR   | 102.25                | 9      | 2.89697   |
| Se001      | SLC25A1 T266M | HLA-B*44:03 | MT | LEAHKYRN[M]W  | 151.82                | WT | LEAHKYRN[T]W  | 166.89                | 10     | 19.459    |
| Se001      | SLC25A1 T266M | HLA-C*14:03 | MT | KYRN[M]WDCGL  | 153.97                | WT | KYRN[T]WDCGL  | 201.93                | 10     | 19.459    |

|       |               |             |    |               |        |    |               |          |    |          |
|-------|---------------|-------------|----|---------------|--------|----|---------------|----------|----|----------|
| Se001 | SLC25A1 T266M | HLA-C*14:03 | MT | [M]WDCGLQL    | 220.07 | WT | [T]WDCGLQL    | 515.41   | 9  | 19.459   |
| Se001 | SLC25A1 T266M | HLA-C*14:03 | MT | YRN[M]WDCGL   | 351.83 | WT | YRN[T]WDCGL   | 563.48   | 9  | 19.459   |
| Se001 | SUN2 Q505E    | HLA-B*44:03 | MT | EEMQA[E]LREL  | 143.91 | WT | EEMQA[Q]LREL  | 109.19   | 10 | 27.5642  |
| Se001 | SUN2 Q505E    | HLA-B*44:03 | MT | A[E]LRELESKI  | 312.42 | WT | A[Q]LRELESKI  | 13421.37 | 10 | 27.5642  |
| Se001 | MECP2 P191A   | HLA-A*33:03 | MT | S[A]KAPGTGR   | 95.68  | WT | S[P]KAPGTGR   | 2221.78  | 9  | 10.73632 |
| Se004 | ALPL G349R    | HLA-B*40:02 | MT | [R]JERENVSMV  | 51.17  | WT | [G]JERENVSMV  | 104.77   | 9  | 96.50631 |
| Se004 | CC2D1B A387D  | HLA-A*33:03 | MT | [D]LQQRNLNKYR | 171.89 | WT | [A]LQQRNLNKYR | 744      | 10 | 10.07498 |
| Se004 | CC2D1B A387D  | HLA-B*40:02 | MT | TESQTVLD[D]L  | 347.31 | WT | TESQTVLD[A]L  | 89.16    | 10 | 10.07498 |
| Se004 | CC2D1B A387D  | HLA-A*33:03 | MT | TVLD[D]LQQR   | 369.66 | WT | TVLD[A]LQQR   | 147.15   | 9  | 10.07498 |
| Se004 | HCN3 W294C    | HLA-A*31:01 | MT | HMVNHS[C]GR   | 26.79  | WT | HMVNHS[W]GR   | 10.53    | 9  | 1.7876   |
| Se004 | HCN3 W294C    | HLA-A*33:03 | MT | HMVNHS[C]GR   | 30.62  | WT | HMVNHS[W]GR   | 9.04     | 9  | 1.7876   |
| Se004 | ARHGEF2 G890C | HLA-C*14:03 | MT | SLPA[C]DALYL  | 241.89 | WT | SLPA[G]DALYL  | 253.43   | 10 | 35.74452 |
| Se004 | ARHGEF2 G890C | HLA-C*03:04 | MT | RSLPA[C]DAL   | 290.7  | WT | RSLPA[G]DAL   | 146.86   | 9  | 35.74452 |
| Se004 | SEC16B G382A  | HLA-C*03:04 | MT | MV[A]SDIAEL   | 18.41  | WT | MV[G]SDIAEL   | 281.07   | 9  | 1.27372  |
| Se004 | SEC16B G382A  | HLA-C*03:04 | MT | V[A]SDIAELLM  | 108.87 | WT | V[G]SDIAELLM  | 5025.7   | 10 | 1.27372  |
| Se004 | SEC16B G382A  | HLA-C*03:04 | MT | MV[A]SDIAEL   | 109.97 | WT | MV[G]SDIAEL   | 1855.53  | 10 | 1.27372  |
| Se004 | SEC16B G382A  | HLA-C*03:04 | MT | SMV[A]SDIAEL  | 126.5  | WT | SMV[G]SDIAEL  | 157.35   | 10 | 1.27372  |
| Se004 | SEC16B G382A  | HLA-C*03:04 | MT | V[A]SDIAEL    | 153.89 | WT | V[G]SDIAEL    | 6403.25  | 9  | 1.27372  |
| Se004 | SEC16B G382A  | HLA-C*14:03 | MT | MV[A]SDIAEL   | 447.05 | WT | MV[G]SDIAEL   | 3242.66  | 9  | 1.27372  |
| Se004 | KIF14 S409C   | HLA-C*03:04 | MT | FIYDVSWF[C]F  | 261.71 | WT | FIYDVSWF[S]F  | 69.51    | 10 | 3.31938  |
| Se004 | KIF14 S409C   | HLA-C*14:03 | MT | IYDVSWF[C]F   | 360.76 | WT | IYDVSWF[S]F   | 85.66    | 9  | 3.31938  |
| Se004 | ELK4 L392F    | HLA-A*31:01 | MT | TQVCF[L]LR    | 19.49  | WT | TQVCF[L]LR    | 64.8     | 9  | 1.8455   |
| Se004 | ELK4 L392F    | HLA-A*31:01 | MT | YTQVCF[L]LR   | 29.36  | WT | YTQVCF[L]LR   | 72.53    | 10 | 1.8455   |
| Se004 | ELK4 L392F    | HLA-A*33:03 | MT | YTQVCF[L]LR   | 30.91  | WT | YTQVCF[L]LR   | 85.62    | 10 | 1.8455   |
| Se004 | ELK4 L392F    | HLA-A*31:01 | MT | L[F]LRFVLER   | 35.04  | WT | L[L]LRFVLER   | 62.71    | 9  | 1.8455   |
| Se004 | ELK4 L392F    | HLA-A*33:03 | MT | FL[F]LRFVLER  | 42.61  | WT | FL[L]LRFVLER  | 149.41   | 10 | 1.8455   |
| Se004 | ELK4 L392F    | HLA-A*31:01 | MT | FL[F]LRFVLER  | 47.73  | WT | FL[L]LRFVLER  | 116.67   | 10 | 1.8455   |
| Se004 | ELK4 L392F    | HLA-A*33:03 | MT | TQVCF[L]LR    | 83.8   | WT | TQVCF[L]LR    | 398.01   | 9  | 1.8455   |
| Se004 | ELK4 L392F    | HLA-A*33:03 | MT | L[F]LRFVLER   | 129.2  | WT | L[L]LRFVLER   | 364.43   | 9  | 1.8455   |
| Se004 | ELK4 L392F    | HLA-C*14:03 | MT | LYTQVCF[L]L   | 167.65 | WT | LYTQVCF[L]L   | 103.86   | 10 | 1.8455   |
| Se004 | ELK4 L392F    | HLA-C*14:03 | MT | LYTQVCF[L]F   | 269.14 | WT | LYTQVCF[L]L   | 134.07   | 9  | 1.8455   |
| Se004 | ELK4 L392F    | HLA-C*03:04 | MT | YTQVCF[L]L    | 458.69 | WT | YTQVCF[L]L    | 304.9    | 9  | 1.8455   |
| Se004 | ATAD2B R1108Q | HLA-C*14:03 | MT | F[Q]HKQRNPM   | 50.4   | WT | F[R]HKQRNPM   | 77.19    | 9  | 1.71645  |
| Se004 | ATAD2B R1108Q | HLA-C*03:04 | MT | F[Q]HKQRNPM   | 206.69 | WT | F[R]HKQRNPM   | 3121.41  | 9  | 1.71645  |
| Se004 | ATAD2B R1108Q | HLA-C*14:03 | MT | AF[Q]HKQRNPM  | 227.05 | WT | AF[R]HKQRNPM  | 170.63   | 10 | 1.71645  |
| Se004 | CEP68 E755Q   | HLA-C*03:04 | MT | AAMEHPC[Q]GV  | 80.48  | WT | AAMEHPC[E]GV  | 122.39   | 10 | 3.21778  |
| Se004 | STK39 T421P   | HLA-B*40:02 | MT | PEIAVSAS[P]I  | 331.52 | WT | PEIAVSAS[T]I  | 612.51   | 10 | 8.69419  |
| Se004 | EPHA4 I141F   | HLA-C*03:04 | MT | [F]ALVSVRVF   | 6      | WT | [I]ALVSVRVF   | 60.79    | 9  | 3.16109  |
| Se004 | EPHA4 I141F   | HLA-C*03:04 | MT | LAFQDVGAC[F]  | 52.81  | WT | LAFQDVGAC[I]  | 156.43   | 10 | 3.16109  |
| Se004 | EPHA4 I141F   | HLA-C*14:03 | MT | [F]ALVSVRVF   | 108.01 | WT | [I]ALVSVRVF   | 480.79   | 9  | 3.16109  |
| Se004 | EPHA4 I141F   | HLA-A*31:01 | MT | GAC[F]ALVSVR  | 143.46 | WT | GAC[I]ALVSVR  | 293.04   | 10 | 3.16109  |
| Se004 | EPHA4 I141F   | HLA-A*31:01 | MT | AC[F]ALVSVR   | 161.46 | WT | AC[I]ALVSVR   | 651.23   | 9  | 3.16109  |
| Se004 | EPHA4 I141F   | HLA-C*03:04 | MT | [I]ALVSVRVFY  | 198.53 | WT | [J]ALVSVRVFY  | 2076.8   | 10 | 3.16109  |
| Se004 | EPHA4 I141F   | HLA-C*03:04 | MT | FQDVGAC[F]AL  | 213.54 | WT | FQDVGAC[I]AL  | 99.23    | 10 | 3.16109  |
| Se004 | EPHA4 I141F   | HLA-C*14:03 | MT | AFQDVGAC[F]   | 274.63 | WT | AFQDVGAC[I]   | 1194.36  | 9  | 3.16109  |
| Se004 | EPHA4 I141F   | HLA-B*40:02 | MT | FQDVGAC[F]AL  | 454.94 | WT | FQDVGAC[I]AL  | 549.27   | 10 | 3.16109  |
| Se004 | EPHA4 I141F   | HLA-C*14:03 | MT | C[F]ALVSVRVF  | 460.54 | WT | C[I]ALVSVRVF  | 4774.08  | 10 | 3.16109  |
| Se004 | NBEAL2 S999F  | HLA-C*03:04 | MT | WAMDMNVLM[F]  | 8.68   | WT | WAMDMNVLM[S]  | 1619.94  | 10 | 3.41435  |
| Se004 | NBEAL2 S999F  | HLA-C*14:03 | MT | WAMDMNVLM[F]  | 104.37 | WT | WAMDMNVLM[S]  | 822.74   | 10 | 3.41435  |
| Se004 | NBEAL2 S999F  | HLA-C*14:03 | MT | AMDMMNVLM[F]  | 445.43 | WT | AMDMMNVLM[S]  | 15624.88 | 9  | 3.41435  |
| Se004 | NBEAL2 S999F  | HLA-C*03:04 | MT | VLM[F]AQLLM   | 495.65 | WT | VLM[S]AQLLM   | 153.31   | 9  | 3.41435  |
| Se004 | IFRD2 S53F    | HLA-A*31:01 | MT | G[F]LTPRPPR   | 36.11  | WT | G[S]LTPRPPR   | 28.32    | 9  | 22.75744 |
| Se004 | IFRD2 S53F    | HLA-A*31:01 | MT | TG[F]LTPRPPR  | 92.5   | WT | TG[S]LTPRPPR  | 647.99   | 10 | 22.75744 |
| Se004 | IFRD2 S53F    | HLA-C*03:04 | MT | [F]LTPRPPRPV  | 143.28 | WT | [S]LTPRPPRPV  | 2375.82  | 10 | 22.75744 |
| Se004 | IFRD2 S53F    | HLA-A*33:03 | MT | TG[F]LTPRPPR  | 186.71 | WT | TG[S]LTPRPPR  | 1282.5   | 10 | 22.75744 |
| Se004 | IFRD2 S53F    | HLA-A*33:03 | MT | TPTG[F]LTPR   | 212.23 | WT | TPTG[S]LTPR   | 933.3    | 9  | 22.75744 |
| Se004 | IFRD2 S53F    | HLA-A*33:03 | MT | G[F]LTPRPPR   | 223.84 | WT | G[S]LTPRPPR   | 467.59   | 9  | 22.75744 |
| Se004 | IFRD2 S53F    | HLA-C*14:03 | MT | [F]LTPRPPRPV  | 264.68 | WT | [S]LTPRPPRPV  | 1124.53  | 10 | 22.75744 |
| Se004 | GRAMD1C E274K | HLA-A*31:01 | MT | SWSSL[K]DYFK  | 178.16 | WT | SWSSL[E]DYFK  | 474      | 10 | 2.26201  |
| Se004 | MFS10 L209F   | HLA-C*03:04 | MT | FAL[F]FAASDL  | 10.2   | WT | FAL[L]FAASDL  | 12.27    | 10 | 21.79016 |
| Se004 | MFS10 L209F   | HLA-B*44:03 | MT | LEMALPWFAL[F] | 21.88  | WT | LEMALPWFAL[L] | 107.62   | 10 | 21.79016 |
| Se004 | MFS10 L209F   | HLA-C*14:03 | MT | [F]FAASDLLF   | 26.54  | WT | [L]FAASDLLF   | 133.53   | 9  | 21.79016 |
| Se004 | MFS10 L209F   | HLA-B*40:02 | MT | LEMALPWFAL[F] | 27.63  | WT | LEMALPWFAL[L] | 9.91     | 10 | 21.79016 |
| Se004 | MFS10 L209F   | HLA-C*14:03 | MT | L[F]FAASDLL   | 70.91  | WT | L[L]FAASDLL   | 1124.55  | 9  | 21.79016 |
| Se004 | MFS10 L209F   | HLA-C*14:03 | MT | L[F]FAASDLLF  | 88.58  | WT | L[L]FAASDLLF  | 1137.2   | 10 | 21.79016 |
| Se004 | MFS10 L209F   | HLA-C*14:03 | MT | MAPWFAL[F]F   | 167.92 | WT | MAPWFAL[L]F   | 65.02    | 9  | 21.79016 |
| Se004 | MFS10 L209F   | HLA-C*14:03 | MT | [F]FAASDLLFI  | 218.29 | WT | [L]FAASDLLFI  | 1109.4   | 10 | 21.79016 |
| Se004 | MFS10 L209F   | HLA-C*14:03 | MT | FAL[F]FAASDL  | 356.66 | WT | FAL[L]FAASDL  | 640      | 10 | 21.79016 |
| Se004 | MFS10 L209F   | HLA-C*03:04 | MT | MAPWFAL[F]F   | 393.02 | WT | MAPWFAL[L]F   | 236      | 9  | 21.79016 |
| Se004 | MAN2B2 R860H  | HLA-B*40:02 | MT | GEAQADL[H]RV  | 143.32 | WT | GEAQADL[R]RV  | 254      | 10 | 5.5156   |
| Se004 | MAN2B2 R860H  | HLA-B*40:02 | MT | AQADL[H]RVLL  | 264.8  | WT | AQADL[R]RVLL  | 845.16   | 9  | 5.5156   |
| Se004 | MAN2B2 R860H  | HLA-B*40:02 | MT | AQADL[H]RVLL  | 316.06 | WT | AQADL[R]RVLL  | 735.25   | 10 | 5.5156   |
| Se004 | MAN2B2 R860H  | HLA-A*33:03 | MT | QADL[H]RVLLR  | 494.4  | WT | QADL[R]RVLLR  | 480.41   | 10 | 5.5156   |
| Se004 | WDFY3 G3428R  | HLA-A*31:01 | MT | RILV[R]DSRGR  | 36.87  | WT | RILV[G]DSRGR  | 87.05    | 10 | 3.40416  |
| Se004 | WDFY3 G3428R  | HLA-A*31:01 | MT | HSRILV[R]DSR  | 49.59  | WT | HSRILV[G]DSR  | 78.39    | 10 | 3.40416  |
| Se004 | WDFY3 G3428R  | HLA-A*33:03 | MT | HSRILV[R]DSR  | 101.07 | WT | HSRILV[G]DSR  | 159.45   | 10 | 3.40416  |
| Se004 | SCOC R44W     | HLA-C*14:03 | MT | S[W]PEVSAGSL  | 37.77  | WT | S[R]PEVSAGSL  | 187.47   | 10 | 58.20973 |
| Se004 | DCLK2 P518R   | HLA-B*44:03 | MT | [R]JENLLVCEY  | 27.82  | WT | [P]JENLLVCEY  | 203.66   | 9  | 3.3311   |

|       |                |             |    |              |        |    |               |          |    |           |
|-------|----------------|-------------|----|--------------|--------|----|---------------|----------|----|-----------|
| Se004 | DCLK2 P518R    | HLA-A*33:03 | MT | SIVHRDIK[R]  | 148.11 | WT | SIVHRDIK[P]   | 37181.45 | 9  | 3.3311    |
| Se004 | DCLK2 P518R    | HLA-A*31:01 | MT | SIVHRDIK[R]  | 169.38 | WT | SIVHRDIK[P]   | 35458.58 | 9  | 3.3311    |
| Se004 | DCLK2 P518R    | HLA-A*31:01 | MT | LSIVHRDIK[R] | 236.74 | WT | LSIVHRDIK[P]  | 33652.03 | 10 | 3.3311    |
| Se004 | DCLK2 P518R    | HLA-A*33:03 | MT | LSIVHRDIK[R] | 343.99 | WT | LSIVHRDIK[P]  | 35797.48 | 10 | 3.3311    |
| Se004 | MYO10 W1375L   | HLA-B*40:02 | MT | EEMHH[L]ITLL | 16.56  | WT | EEMHH[W]ITLL  | 16.08    | 9  | 17.09532  |
| Se004 | MYO10 W1375L   | HLA-B*40:02 | MT | EEMHH[L]ITLL | 37.42  | WT | EEMHH[W]ITLL  | 37.68    | 10 | 17.09532  |
| Se004 | MYO10 W1375L   | HLA-B*44:03 | MT | EEMHH[L]ITLL | 117.36 | WT | EEMHH[W]ITLL  | 97.69    | 10 | 17.09532  |
| Se004 | MYO10 W1375L   | HLA-B*44:03 | MT | EEMHH[L]ITLL | 125.47 | WT | EEMHH[W]ITLL  | 103.75   | 9  | 17.09532  |
| Se004 | CARD6 E201D    | HLA-C*14:03 | MT | RY[D]JELDDSL | 254.37 | WT | RY[E]JELDDSL  | 334.01   | 9  | 8.16256   |
| Se004 | ERBB2IP F212Y  | HLA-C*14:03 | MT | [Y]WMDANRLTF | 5.18   | WT | [F]WMDANRLTF  | 6.72     | 10 | 12.03567  |
| Se004 | ERBB2IP F212Y  | HLA-B*40:02 | MT | KE[Y]WMDANRL | 23.96  | WT | KE[F]WMDANRL  | 21.41    | 10 | 12.03567  |
| Se004 | ERBB2IP F212Y  | HLA-B*44:03 | MT | LEQLSGLKE[Y] | 124.66 | WT | LEQLSGLKE[F]  | 335.47   | 10 | 12.03567  |
| Se004 | ERBB2IP F212Y  | HLA-A*31:01 | MT | KE[Y]WMDANR  | 290.75 | WT | KE[F]WMDANR   | 266.67   | 9  | 12.03567  |
| Se004 | ERBB2IP F212Y  | HLA-C*14:03 | MT | [Y]WMDANRLT  | 390.27 | WT | [F]WMDANRLT   | 814.48   | 9  | 12.03567  |
| Se004 | RASA1 R674C    | HLA-A*31:01 | MT | ILFM[C]CQLSR | 28.31  | WT | ILFM[R]CQLSR  | 19.52    | 10 | 5.10157   |
| Se004 | RASA1 R674C    | HLA-A*31:01 | MT | LFM[C]CQLSR  | 56.1   | WT | LFM[R]CQLSR   | 51.62    | 9  | 5.10157   |
| Se004 | RASA1 R674C    | HLA-A*33:03 | MT | ILFM[C]CQLSR | 88.03  | WT | ILFM[R]CQLSR  | 47.25    | 10 | 5.10157   |
| Se004 | RASA1 R674C    | HLA-A*33:03 | MT | LFM[C]CQLSR  | 136.4  | WT | LFM[R]CQLSR   | 142.94   | 9  | 5.10157   |
| Se004 | RASA1 R674C    | HLA-C*14:03 | MT | LFM[C]CQLSRL | 231.43 | WT | LFM[R]CQLSRL  | 209.44   | 10 | 5.10157   |
| Se004 | PIIP5K2 T1175N | HLA-C*14:03 | MT | ILTPPPA[N]L  | 490.68 | WT | ILTPPPA[T]L   | 141.84   | 9  | 3.9837    |
| Se004 | EGR1 S501T     | HLA-C*14:03 | MT | TYS[T]VPPAF  | 20.26  | WT | TYS[S]VPPAF   | 12.89    | 9  | 118.37778 |
| Se004 | EGR1 S501T     | HLA-C*14:03 | MT | TTYS[T]VPPAF | 74.99  | WT | TTYS[S]VPPAF  | 63.12    | 10 | 118.37778 |
| Se004 | EGR1 S501T     | HLA-C*03:04 | MT | TTYS[T]VPPAF | 89.49  | WT | TTYS[S]VPPAF  | 64.31    | 10 | 118.37778 |
| Se004 | EGR1 S501T     | HLA-C*03:04 | MT | SVATTYS[TV   | 409.6  | WT | SVATTYS[S]V   | 433.11   | 9  | 118.37778 |
| Se004 | ABHD16A D360N  | HLA-A*31:01 | MT | ALKVMP[N]SWR | 25.62  | WT | ALKVMP[D]SWR  | 51.25    | 10 | 42.77196  |
| Se004 | ABHD16A D360N  | HLA-A*33:03 | MT | [N]SWRGLVTR  | 50.62  | WT | [D]SWRGLVTR   | 51.46    | 9  | 42.77196  |
| Se004 | ABHD16A D360N  | HLA-A*31:01 | MT | [N]SWRGLVTR  | 51.23  | WT | [D]SWRGLVTR   | 301.63   | 9  | 42.77196  |
| Se004 | ABHD16A D360N  | HLA-C*03:04 | MT | KVMP[N]SWRGL | 142.48 | WT | KVMP[D]SWRGL  | 280.42   | 10 | 42.77196  |
| Se004 | ABHD16A D360N  | HLA-C*14:03 | MT | VMP[N]SWRGL  | 166.9  | WT | VMP[D]SWRGL   | 178.02   | 9  | 42.77196  |
| Se004 | ABHD16A D360N  | HLA-C*14:03 | MT | KVMP[N]SWRGL | 181.54 | WT | KVMP[D]SWRGL  | 673.88   | 10 | 42.77196  |
| Se004 | ABHD16A D360N  | HLA-A*33:03 | MT | ALKVMP[N]SWR | 240.37 | WT | ALKVMP[D]SWR  | 453.04   | 10 | 42.77196  |
| Se004 | ABHD16A D360N  | HLA-C*14:03 | MT | VMP[N]SWRGLV | 379.11 | WT | VMP[D]SWRGLV  | 434.87   | 10 | 42.77196  |
| Se004 | ABHD16A G257A  | HLA-B*40:02 | MT | CEGNA[A]FYEV | 138.35 | WT | CEGNA[G]FYEV  | 135.54   | 10 | 42.77196  |
| Se004 | MTCH1 R209H    | HLA-C*14:03 | MT | MMMQCVS[H]M  | 34.61  | WT | MMMQCVS[R]M   | 33.03    | 9  | 220.97519 |
| Se004 | MTCH1 R209H    | HLA-C*03:04 | MT | MMMQCVS[H]M  | 40.07  | WT | MMMQCVS[R]M   | 32.94    | 9  | 220.97519 |
| Se004 | MTCH1 R209H    | HLA-C*03:04 | MT | MMMQCVS[H]M  | 60.32  | WT | MMMQCVS[R]JML | 46.59    | 10 | 220.97519 |
| Se004 | MTCH1 R209H    | HLA-C*14:03 | MT | MMMQCVS[H]M  | 69.14  | WT | MMMQCVS[R]JML | 41.69    | 10 | 220.97519 |
| Se004 | MTCH1 R209H    | HLA-C*03:04 | MT | VS[H]MLAHL   | 101.27 | WT | VS[R]MLAHL    | 404.15   | 9  | 220.97519 |
| Se004 | MTCH1 R209H    | HLA-B*40:02 | MT | YEMMMQCVS[H] | 194.42 | WT | YEMMMQCVS[R]  | 1497.45  | 10 | 220.97519 |
| Se004 | MTCH1 R209H    | HLA-C*14:03 | MT | MMQCVS[H]JML | 258.56 | WT | MMQCVS[R]JML  | 139.18   | 9  | 220.97519 |
| Se004 | MTCH1 R209H    | HLA-B*44:03 | MT | YEMMMQCVS[H] | 344.14 | WT | YEMMMQCVS[R]  | 3527.53  | 10 | 220.97519 |
| Se004 | MTCH1 R209H    | HLA-C*03:04 | MT | CVS[H]MLAHL  | 378.35 | WT | CVS[R]MLAHL   | 651.43   | 10 | 220.97519 |
| Se004 | MTCH1 R209H    | HLA-C*03:04 | MT | MMQCVS[H]JML | 398.94 | WT | MMQCVS[R]JML  | 391.66   | 9  | 220.97519 |
| Se004 | UBR2 W1246R    | HLA-A*31:01 | MT | [R]JRTISQQIK | 235.66 | WT | [W]JRTISQQIK  | 3718.27  | 10 | 11.32668  |
| Se004 | PHF3 N1727I    | HLA-C*03:04 | MT | VAQNSPSVE[I] | 181.94 | WT | VAQNSPSVE[N]  | 26354.9  | 10 | 8.72393   |
| Se004 | ASCC3 N1368H   | HLA-A*31:01 | MT | RVF[H]KYPTSK | 26.67  | WT | RVF[N]KYPTSK  | 21.37    | 10 | 5.64025   |
| Se004 | ASCC3 N1368H   | HLA-A*31:01 | MT | LAIFRVF[H]K  | 159.21 | WT | LAIFRVF[N]K   | 211.13   | 9  | 5.64025   |
| Se004 | ASCC3 N1368H   | HLA-A*33:03 | MT | ELAIFRVF[H]K | 233.02 | WT | ELAIFRVF[N]K  | 289.67   | 10 | 5.64025   |
| Se004 | ASCC3 N1368H   | HLA-A*31:01 | MT | VF[H]KYPTSK  | 306.15 | WT | VF[N]KYPTSK   | 210.38   | 9  | 5.64025   |
| Se004 | ASCC3 N1368H   | HLA-A*33:03 | MT | LAIFRVF[H]K  | 333.54 | WT | LAIFRVF[N]K   | 411.09   | 9  | 5.64025   |
| Se004 | TUBE1 D22Y     | HLA-A*31:01 | MT | CCFW[Y]LALR  | 72.51  | WT | CCFW[D]LALR   | 285.9    | 9  | 5.59598   |
| Se004 | TUBE1 D22Y     | HLA-B*40:02 | MT | NQIGCCFW[Y]L | 145.48 | WT | NQIGCCFW[D]L  | 357.8    | 10 | 5.59598   |
| Se004 | TUBE1 D22Y     | HLA-A*33:03 | MT | CCFW[Y]LALR  | 162.83 | WT | CCFW[D]LALR   | 485.56   | 9  | 5.59598   |
| Se004 | TUBE1 D22Y     | HLA-A*31:01 | MT | GCCFW[Y]LALR | 183.22 | WT | GCCFW[D]LALR  | 715.66   | 10 | 5.59598   |
| Se004 | MRPL32 S14F    | HLA-A*31:01 | MT | VVSPW[F]AAR  | 14.82  | WT | VVSPW[S]AAR   | 35.49    | 9  | 93.95535  |
| Se004 | MRPL32 S14F    | HLA-A*33:03 | MT | VVSPW[F]AAR  | 15.48  | WT | VVSPW[S]AAR   | 33.04    | 9  | 93.95535  |
| Se004 | MRPL32 S14F    | HLA-A*33:03 | MT | LVVSPW[F]AAR | 20.9   | WT | LVVSPW[S]AAR  | 39.27    | 10 | 93.95535  |
| Se004 | MRPL32 S14F    | HLA-A*33:03 | MT | W[F]AARGVLR  | 25.91  | WT | W[S]AARGVLR   | 49.08    | 9  | 93.95535  |
| Se004 | MRPL32 S14F    | HLA-A*31:01 | MT | LVVSPW[F]AAR | 31.07  | WT | LVVSPW[S]AAR  | 70.43    | 10 | 93.95535  |
| Se004 | MRPL32 S14F    | HLA-A*31:01 | MT | W[F]AARGVLR  | 63.04  | WT | W[S]AARGVLR   | 74.32    | 9  | 93.95535  |
| Se004 | MRPL32 S14F    | HLA-C*03:04 | MT | [F]AARGVLRNY | 140.96 | WT | [S]AARGVLRNY  | 1896.01  | 10 | 93.95535  |
| Se004 | MRPL32 S14F    | HLA-A*31:01 | MT | PW[F]AARGVLR | 236.65 | WT | PW[S]AARGVLR  | 1672.54  | 10 | 93.95535  |
| Se004 | MRPL32 S14F    | HLA-C*14:03 | MT | [F]AARGVLRNY | 330.41 | WT | [S]AARGVLRNY  | 2035.85  | 10 | 93.95535  |
| Se004 | MRPL32 S14F    | HLA-A*33:03 | MT | PW[F]AARGVLR | 497.9  | WT | PW[S]AARGVLR  | 2678.58  | 10 | 93.95535  |
| Se004 | COBL Q1004R    | HLA-A*31:01 | MT | SGKQSTSS[R]  | 240.36 | WT | SGKQSTSS[Q]   | 34200.05 | 9  | 2.06213   |
| Se004 | TPST1 V265A    | HLA-C*03:04 | MT | LQIPWNHS[A]L | 103.21 | WT | LQIPWNHS[V]L  | 139.8    | 10 | 13.5769   |
| Se004 | TPST1 V265A    | HLA-C*03:04 | MT | HS[A]LHHEEM  | 144.27 | WT | HS[V]LHHEEM   | 108.3    | 9  | 13.5769   |
| Se004 | TPST1 V265A    | HLA-B*40:02 | MT | LQIPWNHS[A]L | 239.61 | WT | LQIPWNHS[V]L  | 232.56   | 10 | 13.5769   |
| Se004 | TPST1 V265A    | HLA-C*14:03 | MT | LQIPWNHS[A]L | 251.99 | WT | LQIPWNHS[V]L  | 569.05   | 10 | 13.5769   |
| Se004 | TPST1 V265A    | HLA-C*14:03 | MT | QIPWNHS[A]L  | 278.06 | WT | QIPWNHS[V]L   | 602.82   | 9  | 13.5769   |
| Se004 | PEG10 R34T     | HLA-C*03:04 | MT | [T]SPPTPTVTL | 318.49 | WT | [R]SPPTPTVTL  | 340.8    | 10 | 34.6753   |
| Se004 | PEG10 R34T     | HLA-C*14:03 | MT | [T]SPPTPTVTL | 378.48 | WT | [R]SPPTPTVTL  | 230.94   | 10 | 34.6753   |
| Se004 | MKLN1 R555K    | HLA-A*31:01 | MT | [K]NSWSCVYK  | 98.34  | WT | [R]NSWSCVYK   | 72.33    | 9  | 6.89404   |
| Se004 | MKLN1 R555K    | HLA-A*31:01 | MT | SFWIYDIV[K]  | 229.18 | WT | SFWIYDIV[R]   | 32.25    | 9  | 6.89404   |
| Se004 | XPO7 R717Q     | HLA-B*40:02 | MT | QEAK[Q]TLVGL | 87.14  | WT | QEAK[R]TLVGL  | 108.04   | 10 | 28.88607  |
| Se004 | XPO7 R717Q     | HLA-A*31:01 | MT | K[Q]TLVGLVLR | 193.29 | WT | K[R]TLVGLVLR  | 4974.19  | 9  | 28.88607  |
| Se004 | XPO7 R717Q     | HLA-B*40:02 | MT | NEQEAK[Q]JTL | 202.32 | WT | NEQEAK[R]JTL  | 382.76   | 9  | 28.88607  |
| Se004 | LY6E C71S      | HLA-C*03:04 | MT | KT[S]SPACPI  | 408.96 | WT | KT[C]SPACPI   | 2580.65  | 9  | 318.12058 |

|       |                |             |    |               |        |    |               |          |    |           |
|-------|----------------|-------------|----|---------------|--------|----|---------------|----------|----|-----------|
| Se004 | USP6NL A556V   | HLA-A*31:01 | MT | KALD[V]EDGKR  | 477.49 | WT | KALD[A]EDGKR  | 1014.71  | 10 | 4.35346   |
| Se004 | IFIT1 C163S    | HLA-C*03:04 | MT | A[S]FEKVLEV   | 312.19 | WT | A[C]FEKVLEV   | 8721.46  | 9  | 62.37524  |
| Se004 | IFIT1 C163S    | HLA-C*14:03 | MT | NYERAKA[S]F   | 357.35 | WT | NYERAKA[C]F   | 1606.38  | 9  | 62.37524  |
| Se004 | ZFYVE27 E71D   | HLA-A*31:01 | MT | IQL[D]AFLSR   | 90.47  | WT | IQL[E]AFLSR   | 84.35    | 9  | 11.61746  |
| Se004 | ZFYVE27 E71D   | HLA-A*31:01 | MT | LIQL[D]AFLSR  | 389    | WT | LIQL[E]AFLSR  | 379.6    | 10 | 11.61746  |
| Se004 | ZFYVE27 E71D   | HLA-B*40:02 | MT | IQL[D]AFLSRL  | 430.2  | WT | IQL[E]AFLSRL  | 282.79   | 10 | 11.61746  |
| Se004 | AFAP1L2 K256R  | HLA-A*33:03 | MT | DVIVLGLQS[R]  | 235.34 | WT | DVIVLGLQS[K]  | 3407.74  | 10 | 4.49712   |
| Se004 | HNRNPUL2 R720Q | HLA-C*14:03 | MT | YYRQYN[Q]DW   | 165.88 | WT | YYRQYN[R]DW   | 176.66   | 9  | 65.10316  |
| Se004 | HNRNPUL2 R720Q | HLA-C*14:03 | MT | QYN[Q]DWQSY   | 396.29 | WT | QYN[R]DWQSY   | 615.26   | 9  | 65.10316  |
| Se004 | HNRNPUL2 R720Q | HLA-C*14:03 | MT | QYN[Q]DWQSY   | 499.98 | WT | QYN[R]DWQSY   | 701.9    | 10 | 65.10316  |
| Se004 | MACROD1 R10C   | HLA-A*31:01 | MT | RLSG[C]LAQLR  | 27.14  | WT | RLSG[R]LAQLR  | 20.22    | 10 | 4.65675   |
| Se004 | MACROD1 R10C   | HLA-C*14:03 | MT | SRLSG[C]LAQL  | 357.06 | WT | SRLSG[R]LAQL  | 292.88   | 10 | 4.65675   |
| Se004 | MACROD1 R10C   | HLA-A*31:01 | MT | LSG[C]LAQLR   | 472.69 | WT | LSG[R]LAQLR   | 398.16   | 9  | 4.65675   |
| Se004 | C11orf80 V70L  | HLA-A*31:01 | MT | KIIM[L]HPKVR  | 42.9   | WT | KIIM[V]HPKVR  | 38.29    | 10 | 4.82897   |
| Se004 | C11orf80 V70L  | HLA-A*31:01 | MT | IIM[L]HPKVR   | 109.09 | WT | IIM[V]HPKVR   | 98.65    | 9  | 4.82897   |
| Se004 | C11orf80 V70L  | HLA-A*33:03 | MT | IIM[L]HPKVR   | 279.15 | WT | IIM[V]HPKVR   | 263.6    | 9  | 4.82897   |
| Se004 | C11orf80 V70L  | HLA-C*14:03 | MT | M[L]HPKVRFFH  | 360.78 | WT | M[V]HPKVRFFH  | 319.82   | 10 | 4.82897   |
| Se004 | HSPA8 G190V    | HLA-C*03:04 | MT | [V]AERNVLIF   | 328.21 | WT | [G]AERNVLIF   | 1988.55  | 9  | 441.40813 |
| Se004 | HSPA8 G190V    | HLA-C*03:04 | MT | V[V]AERNVLIF  | 484.88 | WT | V[G]AERNVLIF  | 2931.08  | 10 | 441.40813 |
| Se004 | ITPR2 S7C      | HLA-B*44:03 | MT | TEKMS[C]FLY   | 84.86  | WT | TEKMS[S]FLY   | 49.5     | 9  | 3.06493   |
| Se004 | ITPR2 S7C      | HLA-B*40:02 | MT | TEKMS[C]FLYI  | 200.59 | WT | TEKMS[S]FLYI  | 193.18   | 10 | 3.06493   |
| Se004 | MMP19 F393L    | HLA-C*14:03 | MT | LYWPLNQKV[L]  | 42     | WT | LYWPLNQKV[F]  | 49.07    | 10 | 3.98569   |
| Se004 | MMP19 F393L    | HLA-C*14:03 | MT | YWPLNQKV[L]L  | 53.72  | WT | YWPLNQKV[F]L  | 77.29    | 10 | 3.98569   |
| Se004 | MMP19 F393L    | HLA-C*14:03 | MT | YWPLNQKV[L]   | 104.08 | WT | YWPLNQKV[F]   | 143.34   | 9  | 3.98569   |
| Se004 | SOCS4 G174C    | HLA-A*33:03 | MT | ELRD[C]QLKR   | 165.41 | WT | ELRD[G]QLKR   | 545.95   | 9  | 3.91325   |
| Se004 | SOCS4 G174C    | HLA-A*33:03 | MT | ELRD[C]QLKRR  | 333.51 | WT | ELRD[G]QLKRR  | 772.61   | 10 | 3.91325   |
| Se004 | CEMIP I123V    | HLA-A*31:01 | MT | GNFTI[V]LYGR  | 26.12  | WT | GNFTI[I]LYGR  | 25.35    | 10 | 2.38728   |
| Se004 | CEMIP I123V    | HLA-A*33:03 | MT | NFTI[V]LYGR   | 28.16  | WT | NFTI[I]LYGR   | 32.16    | 9  | 2.38728   |
| Se004 | CEMIP I123V    | HLA-A*33:03 | MT | GNFTI[V]LYGR  | 81.36  | WT | GNFTI[I]LYGR  | 75.72    | 10 | 2.38728   |
| Se004 | CEMIP I123V    | HLA-A*31:01 | MT | NFTI[V]LYGR   | 108.17 | WT | NFTI[I]LYGR   | 131.94   | 9  | 2.38728   |
| Se004 | CEMIP I123V    | HLA-B*40:02 | MT | FQGNFTI[V]L   | 368.72 | WT | FQGNFTI[I]L   | 557.11   | 9  | 2.38728   |
| Se004 | CCDC64B L241F  | HLA-A*33:03 | MT | E[F]LLLRERR   | 25.61  | WT | E[L]LLLRERR   | 71.02    | 10 | 1.94      |
| Se004 | CCDC64B L241F  | HLA-A*33:03 | MT | E[F]LLLRERR   | 28.42  | WT | E[L]LLLRERR   | 65.25    | 9  | 1.94      |
| Se004 | CCDC64B L241F  | HLA-A*33:03 | MT | TTHEE[F]LLLR  | 53.09  | WT | TTHEE[L]LLLR  | 118.23   | 10 | 1.94      |
| Se004 | CCDC64B L241F  | HLA-A*31:01 | MT | TTHEE[F]LLLR  | 106.35 | WT | TTHEE[L]LLLR  | 230.45   | 10 | 1.94      |
| Se004 | CCDC64B L241F  | HLA-A*33:03 | MT | [F]LLLRERR    | 111.02 | WT | [L]LLLRERR    | 278.84   | 9  | 1.94      |
| Se004 | CCDC64B L241F  | HLA-A*31:01 | MT | [F]LLLRERR    | 134.91 | WT | [L]LLLRERR    | 92.5     | 9  | 1.94      |
| Se004 | CCDC64B L241F  | HLA-A*31:01 | MT | E[F]LLLRERR   | 337.06 | WT | E[L]LLLRERR   | 554.61   | 10 | 1.94      |
| Se004 | CCDC64B L241F  | HLA-A*31:01 | MT | E[F]LLLRERR   | 411.78 | WT | E[L]LLLRERR   | 477.95   | 9  | 1.94      |
| Se004 | CCDC64B L241F  | HLA-C*03:04 | MT | TTHEE[F]LLL   | 472.6  | WT | TTHEE[L]LLL   | 996.7    | 9  | 1.94      |
| Se004 | APIG1 T734M    | HLA-C*03:04 | MT | [M]IQASNSTEL  | 83.48  | WT | [T]IQASNSTEL  | 600.58   | 10 | 11.12367  |
| Se004 | APIG1 T734M    | HLA-C*03:04 | MT | NTNPSVTVI[M]  | 490.54 | WT | NTNPSVTVI[T]  | 20778.02 | 10 | 11.12367  |
| Se004 | TP53 G113D     | HLA-A*31:01 | MT | SSCMG[D]MNR   | 180.37 | WT | SSCMG[G]MNR   | 110.57   | 9  | 25.9208   |
| Se004 | TP53 G113D     | HLA-A*31:01 | MT | SSCMG[D]MNR   | 321.03 | WT | SSCMG[G]MNR   | 172.56   | 10 | 25.9208   |
| Se004 | TP53 G113D     | HLA-A*33:03 | MT | SSCMG[D]MNR   | 411.15 | WT | SSCMG[G]MNR   | 399.16   | 9  | 25.9208   |
| Se004 | TP53 G113D     | HLA-A*33:03 | MT | NSSCMG[D]MNR  | 442.58 | WT | NSSCMG[G]MNR  | 296.66   | 10 | 25.9208   |
| Se004 | ALKBH5 P322L   | HLA-A*31:01 | MT | ALK[L]KRSHR   | 51.57  | WT | ALK[P]KRSHR   | 27.25    | 9  | 37.46335  |
| Se004 | ALKBH5 P322L   | HLA-A*33:03 | MT | ALK[L]KRSHR   | 366.14 | WT | ALK[P]KRSHR   | 260.63   | 9  | 37.46335  |
| Se004 | MED24 Q874H    | HLA-A*31:01 | MT | AS[H]LHTVNM   | 52.02  | WT | AS[Q]LHTVNM   | 96.95    | 10 | 16.39195  |
| Se004 | MED24 Q874H    | HLA-C*03:04 | MT | SAS[H]LHTVNM  | 58.58  | WT | SAS[Q]LHTVNM  | 61.88    | 10 | 16.39195  |
| Se004 | MED24 Q874H    | HLA-C*03:04 | MT | MSSSLAS[H]L   | 70     | WT | MSSSLAS[Q]L   | 45.88    | 10 | 16.39195  |
| Se004 | MED24 Q874H    | HLA-C*03:04 | MT | LSAS[H]LHTV   | 369.42 | WT | LSAS[Q]LHTV   | 1380.75  | 9  | 16.39195  |
| Se004 | MED24 Q874H    | HLA-A*33:03 | MT | AS[H]LHTVNM   | 453.05 | WT | AS[Q]LHTVNM   | 903.09   | 10 | 16.39195  |
| Se004 | STAT5B S210F   | HLA-A*33:03 | MT | QV[F]LEAWLQR  | 47.93  | WT | QV[S]LEAWLQR  | 276.5    | 10 | 5.23389   |
| Se004 | STAT5B S210F   | HLA-A*31:01 | MT | V[F]LEAWLQR   | 57.33  | WT | V[S]LEAWLQR   | 129.84   | 9  | 5.23389   |
| Se004 | STAT5B S210F   | HLA-A*31:01 | MT | QV[F]LEAWLQR  | 72.06  | WT | QV[S]LEAWLQR  | 543.61   | 10 | 5.23389   |
| Se004 | STAT5B S210F   | HLA-A*33:03 | MT | V[F]LEAWLQR   | 178.83 | WT | V[S]LEAWLQR   | 817.53   | 9  | 5.23389   |
| Se004 | STAT5B S210F   | HLA-B*40:02 | MT | KQV[F]LEAWL   | 338.78 | WT | KQV[S]LEAWL   | 477.25   | 9  | 5.23389   |
| Se004 | AOC3 L516M     | HLA-C*03:04 | MT | YGNQVSEHT[M]  | 108.34 | WT | YGNQVSEHT[L]  | 101.47   | 10 | 1.32599   |
| Se004 | AOC3 L516M     | HLA-C*14:03 | MT | YGNQVSEHT[M]  | 380.71 | WT | YGNQVSEHT[L]  | 507.18   | 10 | 1.32599   |
| Se004 | AOC3 L516M     | HLA-B*40:02 | MT | SEHT[M]GTVHT  | 407.7  | WT | SEHT[L]GTVHT  | 424.87   | 10 | 1.32599   |
| Se004 | MXRA7 P145R    | HLA-A*33:03 | MT | EGFSFKYS[R]   | 16.42  | WT | EGFSFKYS[P]   | 21887.4  | 9  | 7.18157   |
| Se004 | MXRA7 P145R    | HLA-A*31:01 | MT | SFKYS[R]GKLR  | 46.73  | WT | SFKYS[P]GKLR  | 45.81    | 10 | 7.18157   |
| Se004 | MXRA7 P145R    | HLA-A*33:03 | MT | SFKYS[R]GKLR  | 62.15  | WT | SFKYS[P]GKLR  | 82.43    | 10 | 7.18157   |
| Se004 | MXRA7 P145R    | HLA-C*03:04 | MT | FSFKYS[R]GKLR | 65.16  | WT | FSFKYS[P]GKLR | 41.96    | 10 | 7.18157   |
| Se004 | MXRA7 P145R    | HLA-A*31:01 | MT | EGFSFKYS[R]   | 127.76 | WT | EGFSFKYS[P]   | 29690.4  | 9  | 7.18157   |
| Se004 | MXRA7 P145R    | HLA-A*31:01 | MT | [R]GKLRGNQYK  | 254.9  | WT | [P]GKLRGNQYK  | 11885.67 | 10 | 7.18157   |
| Se004 | MXRA7 P145R    | HLA-C*14:03 | MT | FSFKYS[R]GKLR | 306.13 | WT | FSFKYS[P]GKLR | 392.35   | 10 | 7.18157   |
| Se004 | ARHGEF1 L602M  | HLA-C*03:04 | MT | QSSDPM[M]SEF  | 297.59 | WT | QSSDPM[L]SEF  | 405.32   | 10 | 7.17865   |
| Se004 | ARHGEF1 L602M  | HLA-C*03:04 | MT | SSDPM[M]SEF   | 314.38 | WT | SSDPM[L]SEF   | 517.12   | 9  | 7.17865   |
| Se004 | SLC1A5 V168M   | HLA-A*31:01 | MT | NG[M]AKHISR   | 93.96  | WT | NG[V]AKHISR   | 443.4    | 9  | 63.33117  |
| Se004 | SLC1A5 V168M   | HLA-A*33:03 | MT | NG[M]AKHISR   | 98.15  | WT | NG[V]AKHISR   | 304.22   | 9  | 63.33117  |
| Se004 | SLC1A5 V168M   | HLA-A*33:03 | MT | NNG[M]AKHISR  | 322.07 | WT | NNG[V]AKHISR  | 549.56   | 10 | 63.33117  |
| Se004 | SLC1A5 V168M   | HLA-C*03:04 | MT | [M]AKHISRFIL  | 376.46 | WT | [V]AKHISRFIL  | 1815.83  | 10 | 63.33117  |
| Se004 | SLC1A5 V168M   | HLA-B*44:03 | MT | EENNG[M]AKHI  | 380.76 | WT | EENNG[V]AKHI  | 337.75   | 10 | 63.33117  |
| Se004 | HELZ2 D523E    | HLA-B*40:02 | MT | GE[D]GLLDTV   | 326    | WT | GE[I]GLLDTV   | 550.06   | 9  | 8.55094   |
| Se004 | CABIN1 Y1300H  | HLA-C*03:04 | MT | TSPY[H]TATPI  | 376.74 | WT | TSPY[Y]TATPI  | 558.78   | 10 | 27.28784  |
| Se004 | EP300 S875T    | HLA-A*33:03 | MT | Q[T]QALHPPPR  | 58.51  | WT | Q[S]QALHPPPR  | 206.06   | 10 | 7.36724   |

|       |                |             |    |               |        |    |               |          |    |           |
|-------|----------------|-------------|----|---------------|--------|----|---------------|----------|----|-----------|
| Se004 | EP300 S875T    | HLA-A*31:01 | MT | Q[T]QALHPPPR  | 58.64  | WT | Q[S]QALHPPPR  | 91.78    | 10 | 7.36724   |
| Se004 | EP300 S875T    | HLA-A*31:01 | MT | [T]QALHPPPR   | 127.5  | WT | [S]QALHPPPR   | 93.33    | 9  | 7.36724   |
| Se004 | EP300 S875T    | HLA-A*33:03 | MT | [T]QALHPPPR   | 309.99 | WT | [S]QALHPPPR   | 561.3    | 9  | 7.36724   |
| Se004 | EP300 S875T    | HLA-C*14:03 | MT | MPPGPQ[T]QAL  | 481.29 | WT | MPPGPQ[S]QAL  | 636.87   | 10 | 7.36724   |
| Se004 | PLXNB2 R241W   | HLA-A*31:01 | MT | A[W]NRLLAR    | 79.02  | WT | A[R]NRLLAR    | 2365.21  | 9  | 46.13768  |
| Se004 | PLXNB2 R241W   | HLA-A*31:01 | MT | PA[W]NRLLAR   | 172.17 | WT | PA[R]NRLLAR   | 572.83   | 10 | 46.13768  |
| Se004 | PLXNB2 R241W   | HLA-C*14:03 | MT | HPA[W]NRLL    | 211.02 | WT | HPA[R]NRLL    | 828.99   | 9  | 46.13768  |
| Se004 | PLXNB2 R241W   | HLA-C*14:03 | MT | A[W]NRLLARM   | 298.65 | WT | A[R]NRLLARM   | 1219.54  | 10 | 46.13768  |
| Se004 | PLXNB2 R241W   | HLA-A*33:03 | MT | PA[W]NRLLAR   | 353.75 | WT | PA[R]NRLLAR   | 1347.08  | 10 | 46.13768  |
| Se004 | PLXNB2 R241W   | HLA-C*03:04 | MT | HPA[W]NRLL    | 421.44 | WT | HPA[R]NRLL    | 1273.27  | 9  | 46.13768  |
| Se004 | PLXNB2 R241W   | HLA-C*14:03 | MT | KHPA[W]NRLL   | 443.38 | WT | KHPA[R]NRLL   | 693.69   | 9  | 46.13768  |
| Se004 | PLXNB2 R241W   | HLA-C*14:03 | MT | KHPA[W]NRLL   | 470.33 | WT | KHPA[R]NRLL   | 692.97   | 10 | 46.13768  |
| Se004 | MBTPS2 Q210K   | HLA-A*31:01 | MT | [K]LISPVQQLR  | 27.82  | WT | [Q]LISPVQQLR  | 168.82   | 10 | 4.80532   |
| Se004 | BCOR R861H     | HLA-B*44:03 | MT | EELG[H]ISDF   | 151.24 | WT | EELG[R]ISDF   | 427.42   | 9  | 5.37696   |
| Se004 | BCOR R861H     | HLA-B*40:02 | MT | REELG[H]ISDF  | 246.58 | WT | REELG[R]ISDF  | 407.1    | 10 | 5.37696   |
| Se004 | KRBOX4 L32F    | HLA-A*33:03 | MT | DSAQKN[F]YR   | 21.15  | WT | DSAQKN[L]YR   | 128.46   | 9  | 6.44805   |
| Se004 | KRBOX4 L32F    | HLA-C*14:03 | MT | [F]YRDVMLENY  | 48.93  | WT | [L]YRDVMLENY  | 274.26   | 10 | 6.44805   |
| Se004 | KRBOX4 L32F    | HLA-A*31:01 | MT | DSAQKN[F]YR   | 237.66 | WT | DSAQKN[L]YR   | 1403.96  | 9  | 6.44805   |
| Se004 | SUV39H1 I230M  | HLA-A*14:03 | MT | VRLRAGL[P]M   | 189.91 | WT | VRLRAGL[P]I   | 450.69   | 9  | 4.24908   |
| Se004 | SUV39H1 I230M  | HLA-A*31:01 | MT | P[M]YECNSRCR  | 266.53 | WT | P[I]YECNSRCR  | 1136.02  | 10 | 4.24908   |
| Se004 | GPC4 C189F     | HLA-C*03:04 | MT | [F]VSKYTEQL   | 45.88  | WT | [C]VSKYTEQL   | 2570.73  | 9  | 1.82387   |
| Se004 | GPC4 C189F     | HLA-B*44:03 | MT | DEYLE[F]VSKY  | 131.71 | WT | DEYLE[C]VSKY  | 154.31   | 10 | 1.82387   |
| Se004 | GPC4 C189F     | HLA-C*14:03 | MT | HFTDEYLE[F]   | 238.02 | WT | HFTDEYLE[C]   | 16093.99 | 9  | 1.82387   |
| Se004 | GPC4 C189F     | HLA-C*14:03 | MT | YHFTDEYLE[F]  | 283.49 | WT | YHFTDEYLE[C]  | 15787.59 | 10 | 1.82387   |
| Se004 | GPC4 C189F     | HLA-C*14:03 | MT | [F]VSKYTEQL   | 457.4  | WT | [C]VSKYTEQL   | 6064.47  | 9  | 1.82387   |
| Se005 | PLEKHG5 Y435C  | HLA-A*14:03 | MT | LFKP[Y]IRYCM  | 340.47 | WT | LFKP[Y]IRYCM  | 330.29   | 10 | 3.42977   |
| Se005 | TTC21B A279V   | HLA-C*14:03 | MT | [V]MEPQNAQLF  | 472.72 | WT | [A]MEPQNAQLF  | 950.26   | 10 | 3.88735   |
| Se005 | ZNF445 A281V   | HLA-C*14:03 | MT | FTKP[V]LISWL  | 272.43 | WT | FTKP[A]LISWL  | 117.01   | 10 | 1.966     |
| Se005 | ZNF445 A281V   | HLA-A*33:03 | MT | [V]LISWLEAR   | 286.61 | WT | [A]LISWLEAR   | 320.95   | 9  | 1.966     |
| Se005 | CMSS1 N220K    | HLA-A*24:02 | MT | KFLVFDW[K]W   | 186    | WT | KFLVFDW[N]W   | 136.54   | 9  | 21.36121  |
| Se005 | CMSS1 N220K    | HLA-A*33:03 | MT | FLVFDW[K]WR   | 367.9  | WT | FLVFDW[N]WR   | 131.92   | 9  | 21.36121  |
| Se005 | CMSS1 N220K    | HLA-A*33:03 | MT | DW[K]WRDQKLR  | 386.83 | WT | DW[N]WRDQKLR  | 388.05   | 10 | 21.36121  |
| Se005 | SYNPO2 S1106F  | HLA-A*24:02 | MT | RTYFPAYL[F]   | 70.44  | WT | RTYFPAYL[S]   | 21258.62 | 9  | 3.99695   |
| Se005 | SYNPO2 S1106F  | HLA-C*14:03 | MT | RTYFPAYL[F]   | 167.97 | WT | RTYFPAYL[S]   | 9088.4   | 9  | 3.99695   |
| Se005 | SYNPO2 S1106F  | HLA-C*14:03 | MT | IRTYFPAYL[F]  | 413.24 | WT | IRTYFPAYL[S]  | 16453.64 | 10 | 3.99695   |
| Se005 | MDN1 T2349I    | HLA-A*33:03 | MT | ILLALH[I]ETR  | 224.48 | WT | ILLALH[T]ETR  | 237.53   | 10 | 2.36508   |
| Se005 | GSDMD L134F    | HLA-A*33:03 | MT | NTWQTL[F]HER  | 10.5   | WT | NTWQTL[L]HER  | 22.16    | 10 | 29.73649  |
| Se005 | GSDMD L134F    | HLA-A*33:03 | MT | TL[F]HERHLR   | 12.51  | WT | TL[L]HERHLR   | 41.88    | 9  | 29.73649  |
| Se005 | GSDMD L134F    | HLA-A*33:03 | MT | QTL[L]HERHLR  | 23.56  | WT | QTL[L]HERHLR  | 34.96    | 10 | 29.73649  |
| Se005 | GSDMD L134F    | HLA-A*33:03 | MT | TWQTL[F]HER   | 32.01  | WT | TWQTL[L]HER   | 72.56    | 9  | 29.73649  |
| Se005 | SMARCA2 P127R  | HLA-C*14:03 | MT | YMSPHPS[R]L   | 15.69  | WT | YMSPHPS[P]L   | 4.99     | 9  | 9.1711    |
| Se005 | SMARCA2 P127R  | HLA-C*14:03 | MT | GYMSPHPS[R]L  | 22.55  | WT | GYMSPHPS[P]L  | 9.24     | 10 | 9.1711    |
| Se005 | SMARCA2 P127R  | HLA-A*33:03 | MT | GYMSPHPS[R]   | 187.78 | WT | GYMSPHPS[P]   | 35506.17 | 9  | 9.1711    |
| Se005 | SMARCA2 P127R  | HLA-A*24:02 | MT | GYMSPHPS[R]L  | 257.29 | WT | GYMSPHPS[P]L  | 221.34   | 10 | 9.1711    |
| Se005 | SMARCA2 P127R  | HLA-C*01:02 | MT | YMSPHPS[R]L   | 432.05 | WT | YMSPHPS[P]L   | 117.75   | 9  | 9.1711    |
| Se005 | SMARCA2 P127R  | HLA-A*33:03 | MT | QGYMSPHPS[R]  | 432.8  | WT | QGYMSPHPS[P]  | 39601.17 | 10 | 9.1711    |
| Se005 | DFNB31 S407N   | HLA-A*33:03 | MT | S[N]KELPRNER  | 334.05 | WT | S[S]KELPRNER  | 210.08   | 10 | 1.84475   |
| Se005 | SPI1 Q93H      | HLA-C*14:03 | MT | LYRHMELE[H]M  | 162.7  | WT | LYRHMELE[Q]M  | 132.96   | 10 | 20.32371  |
| Se005 | SPI1 Q93H      | HLA-B*44:03 | MT | MELE[H]MHVL   | 175.41 | WT | MELE[Q]MHVL   | 277.15   | 9  | 20.32371  |
| Se005 | SPI1 Q93H      | HLA-C*14:03 | MT | [H]MHVLDTPM   | 227.85 | WT | [Q]MHVLDTPM   | 1187.68  | 9  | 20.32371  |
| Se005 | CD163 P1037T   | HLA-A*33:03 | MT | [T]T]QKATTGR  | 163.69 | WT | [T]P]QKATTGR  | 4088.22  | 9  | 13.6809   |
| Se005 | RBM25 P750T    | HLA-B*44:03 | MT | [T]ELFAYPLDW  | 27.38  | WT | [P]ELFAYPLDW  | 338.75   | 10 | 23.13121  |
| Se005 | PTPN21 R59Q    | HLA-B*44:03 | MT | [R]EVTYFSLW   | 14.16  | WT | [R]EVTYFSLW   | 17.42    | 9  | 3.08457   |
| Se005 | PTPN21 R59Q    | HLA-B*44:03 | MT | [Q]EVTYFSLWY  | 20.6   | WT | [R]EVTYFSLWY  | 20.33    | 10 | 3.08457   |
| Se005 | PTPN21 R59Q    | HLA-B*44:03 | MT | LEL[Q]EVTYF   | 91.64  | WT | LEL[R]EVTYF   | 109.68   | 9  | 3.08457   |
| Se005 | SCAPER G22C    | HLA-A*33:03 | MT | IVAAE[Q]RTAR  | 124.89 | WT | IVAAE[G]RTAR  | 203.34   | 10 | 2.511     |
| Se005 | MUC16 V9603I   | HLA-B*44:03 | MT | TETST[I]LYKM  | 110.28 | WT | TETST[V]LYKM  | 99.75    | 10 | 4.76995   |
| Se005 | GNAS A46P      | HLA-A*33:03 | MT | RAL[P]T]SNAR  | 321.78 | WT | RAL[A]T]SNAR  | 251.8    | 9  | 252.56319 |
| Se005 | PANX2 T188M    | HLA-A*33:03 | MT | QSKGPGI[M]ER  | 198.13 | WT | QSKGPGI[T]ER  | 258.17   | 10 | 2.10672   |
| Se005 | SLC25A43 A89T  | HLA-A*24:02 | MT | [T]YRKFFVFLF  | 24.17  | WT | [A]YRKFFVFLF  | 56.59    | 9  | 3.64983   |
| Se005 | SLC25A43 A89T  | HLA-A*33:03 | MT | SAVQLA[T]YR   | 61.79  | WT | SAVQLA[A]YR   | 44.69    | 9  | 3.64983   |
| Se005 | SLC25A43 A89T  | HLA-A*33:03 | MT | CSAVQLA[T]YR  | 75.42  | WT | CSAVQLA[A]YR  | 56.74    | 10 | 3.64983   |
| Se005 | SLC25A43 A89T  | HLA-C*14:03 | MT | [T]YRKFFVFLF  | 153.89 | WT | [A]YRKFFVFLF  | 259.82   | 9  | 3.64983   |
| Se005 | SLC25A43 A89T  | HLA-A*24:02 | MT | A[T]YRKFFVFLF | 437.27 | WT | A[A]YRKFFVFLF | 1061.54  | 10 | 3.64983   |
| Se005 | IDH3G M70I     | HLA-A*33:03 | MT | [L]LHVKSVFR   | 53.13  | WT | [L]M]LHVKSVFR | 39.15    | 10 | 29.13056  |
| Se005 | IDH3G M70I     | HLA-A*33:03 | MT | [I]LHVKSVFR   | 66.34  | WT | [M]LHVKSVFR   | 15.02    | 9  | 29.13056  |
| Se006 | DNAJC11 Y391F  | HLA-B*55:02 | MT | LPSAMF[F]ATV  | 27.31  | WT | LPSAMF[Y]ATV  | 49.73    | 10 | 17.95547  |
| Se006 | DNAJC11 Y391F  | HLA-B*55:02 | MT | LPSAMF[F]AT   | 33.89  | WT | LPSAMF[Y]AT   | 37.08    | 9  | 17.95547  |
| Se006 | DNAJC11 Y391F  | HLA-C*15:02 | MT | [F]ATVGPLVV   | 95.17  | WT | [Y]ATVGPLVV   | 98.3     | 9  | 17.95547  |
| Se006 | DNAJC11 Y391F  | HLA-B*51:01 | MT | LPSAMF[F]ATV  | 98.08  | WT | LPSAMF[Y]ATV  | 137.91   | 10 | 17.95547  |
| Se006 | ARHGEF10L A97V | HLA-A*11:01 | MT | A[V]DAAAFSGAR | 375.51 | WT | A[A]DAAAFSGAR | 997.34   | 10 | 5.10718   |
| Se006 | POMGNT1 A377S  | HLA-C*15:02 | MT | I[S]VDFFSFL   | 86.3   | WT | I[A]VDFFSFL   | 166.54   | 9  | 30.33687  |
| Se006 | ATXN7L2 R230W  | HLA-A*11:01 | MT | KTH[Q]KMARK   | 26.33  | WT | KTH[R]KMARK   | 57.49    | 9  | 1.57373   |
| Se006 | ATXN7L2 R230W  | HLA-A*11:01 | MT | RLPPKTH[W]K   | 180.8  | WT | RLPPKTH[R]K   | 235.11   | 9  | 1.57373   |
| Se006 | CEP350 N2321S  | HLA-A*11:01 | MT | [S]LHKSEMLK   | 70.42  | WT | [N]LHKSEMLK   | 564.51   | 10 | 2.79971   |
| Se006 | CEP350 N2321S  | HLA-A*11:01 | MT | GLAIE[S]LHK   | 145.09 | WT | GLAIE[N]LHK   | 176.13   | 9  | 2.79971   |
| Se006 | LGR6 T296N     | HLA-C*15:02 | MT | LTDNQL[N]TL   | 385.04 | WT | LTDNQL[T]TL   | 305.19   | 9  | 12.05021  |
| Se006 | CR2 Y996H      | HLA-A*11:01 | MT | IVITL[H]VISK  | 25.79  | WT | IVITL[Y]VISK  | 25.19    | 10 | 1.24577   |

|       |                |             |    |                |        |    |                |          |    |          |
|-------|----------------|-------------|----|----------------|--------|----|----------------|----------|----|----------|
| Se006 | CR2 Y996H      | HLA-A*11:01 | MT | VITL[H]VISK    | 41.47  | WT | VITL[Y]VISK    | 40.3     | 9  | 1.24577  |
| Se006 | GPD2 R91T      | HLA-A*11:01 | MT | ALDAVT[T]GLK   | 82.77  | WT | ALDAVT[R]GLK   | 168.83   | 10 | 19.31584 |
| Se006 | RBMS1 R181H    | HLA-A*11:01 | MT | GTS[H]GVGFAR   | 89.32  | WT | GTS[R]GVGFAR   | 102.68   | 10 | 24.7626  |
| Se006 | RBMS1 R181H    | HLA-A*11:01 | MT | TS[H]GVGFAR    | 187.45 | WT | TS[R]GVGFAR    | 809.11   | 9  | 24.7626  |
| Se006 | SETMAR G62A    | HLA-B*55:02 | MT | TPDHVVGPA[A]   | 449.11 | WT | TPDHVVGPA[G]A  | 1597.48  | 10 | 6.79358  |
| Se006 | SETMAR G62A    | HLA-B*55:02 | MT | TPDHVVGPA[A]   | 495.06 | WT | TPDHVVGPA[G]   | 15629.44 | 9  | 6.79358  |
| Se006 | FGF12 V140D    | HLA-A*11:01 | MT | SSD[D]FTPECK   | 281.16 | WT | SSD[V]FTPECK   | 140.12   | 10 | 7.23121  |
| Se006 | USP38 I175L    | HLA-C*15:02 | MT | RT[L]GHFQCV    | 62.97  | WT | RT[I]GHFQCV    | 22.04    | 9  | 4.0153   |
| Se006 | CUL7 R503H     | HLA-C*15:02 | MT | [H]TYVWHWHM    | 120.07 | WT | [R]TYVWHWHML   | 54.99    | 10 | 14.13804 |
| Se006 | CUL7 R503H     | HLA-C*15:02 | MT | [H]TYVWHWHM    | 339.54 | WT | [R]TYVWHWHM    | 129.06   | 9  | 14.13804 |
| Se006 | ADGRE5 D383E   | HLA-C*15:02 | MT | KVMC[E]NPNV    | 249.6  | WT | KVMC[D]NPNV    | 198.03   | 9  | 2.95536  |
| Se006 | SPIDR I546K    | HLA-A*11:01 | MT | [K]IDEDPIYK    | 56.77  | WT | [I]IDEDPIYK    | 52.62    | 9  | 23.99669 |
| Se006 | VPS13B K2922N  | HLA-A*15:02 | MT | AT[N]VHPGGTV   | 175.05 | WT | AT[K]VHPGGTV   | 1593.05  | 10 | 2.57355  |
| Se006 | DENND3 P867S   | HLA-C*15:02 | MT | MSNEM[S]MTL    | 39.09  | WT | MSNEM[P]MTL    | 33.27    | 9  | 3.42797  |
| Se006 | DENND3 P867S   | HLA-C*15:02 | MT | M[S]MTLPETTL   | 105.24 | WT | M[P]MTLPETTL   | 10009.34 | 10 | 3.42797  |
| Se006 | PITRM1 G9V     | HLA-A*11:01 | MT | RQ[V]LCLVLR    | 417.63 | WT | RQ[G]LCLVLR    | 835.44   | 9  | 32.64178 |
| Se006 | PRKCQ V152L    | HLA-A*11:01 | MT | [L]ANLCCGINQK  | 193.13 | WT | [V]ANLCCGINQK  | 119.83   | 10 | 4.43087  |
| Se006 | CYP2R1 K68M    | HLA-C*15:02 | MT | HVYMR[M]QSQV   | 304.73 | WT | HVYMR[K]QSQV   | 953.3    | 10 | 3.18593  |
| Se006 | CREB3L1 K289E  | HLA-A*11:01 | MT | LTKAE[E]ALK    | 392.2  | WT | LTKAE[K]ALK    | 613.11   | 10 | 3.2895   |
| Se006 | VPS51 R152H    | HLA-C*15:02 | MT | FSA[H]ISATL    | 30.44  | WT | FSA[R]ISATL    | 41.54    | 9  | 22.8741  |
| Se006 | ARHGEF12 F794L | HLA-A*11:01 | MT | KVLDQV[L]YQR   | 82.75  | WT | KVLDQV[F]YQR   | 58.24    | 10 | 11.72555 |
| Se006 | ARHGEF12 F794L | HLA-C*15:02 | MT | RTLKVLDQV[L]   | 316.74 | WT | RTLKVLDQV[F]   | 1381.56  | 10 | 11.72555 |
| Se006 | ETS1 S193L     | HLA-A*11:01 | MT | IS[L]JEELLSLK  | 37.08  | WT | IS[S]JEELLSLK  | 39.79    | 10 | 10.48483 |
| Se006 | ETS1 S193L     | HLA-A*11:01 | MT | S[L]JEELLSLK   | 124.67 | WT | S[S]JEELLSLK   | 86.12    | 9  | 10.48483 |
| Se006 | ETS1 S193L     | HLA-C*15:02 | MT | IS[L]JEELLSL   | 388.46 | WT | IS[S]JEELLSL   | 278.69   | 9  | 10.48483 |
| Se006 | APOLD1 E147A   | HLA-A*11:01 | MT | LIFCNSR[A]LR   | 156.78 | WT | LIFCNSR[E]LR   | 253.23   | 10 | 3.14587  |
| Se006 | APOLD1 E147A   | HLA-C*15:02 | MT | R[A]LRRVQEI    | 183.45 | WT | R[E]LRRVQEI    | 17416.89 | 9  | 3.14587  |
| Se006 | NUP58 G322V    | HLA-C*15:02 | MT | RTQKTTP[V]L    | 493.24 | WT | RTQKTTP[G]L    | 720.96   | 9  | 2.27467  |
| Se006 | AREL1 A586T    | HLA-C*15:02 | MT | RSFL[T]QIIGL   | 199.69 | WT | RSFL[A]QIIGL   | 149.17   | 10 | 12.57094 |
| Se006 | AREL1 A586T    | HLA-C*15:02 | MT | FTRSFL[T]QI    | 369.36 | WT | FTRSFL[A]QI    | 412.5    | 9  | 12.57094 |
| Se006 | AREL1 A586T    | HLA-C*15:02 | MT | FTRSFL[T]QII   | 370.35 | WT | FTRSFL[A]QII   | 398.18   | 10 | 12.57094 |
| Se006 | AKT1 P313L     | HLA-A*11:01 | MT | KTFCGT[L]EY    | 13.39  | WT | KTFCGT[P]EY    | 37.88    | 9  | 56.02013 |
| Se006 | AKT1 P313L     | HLA-C*15:02 | MT | KTFCGT[L]EYL   | 55.99  | WT | KTFCGT[P]EYL   | 59.23    | 10 | 56.02013 |
| Se006 | AKT1 P313L     | HLA-C*15:02 | MT | KTFCGT[L]EY    | 131.32 | WT | KTFCGT[P]EY    | 418.08   | 9  | 56.02013 |
| Se006 | AKT1 P313L     | HLA-C*15:02 | MT | ATMKTFCGT[L]   | 184.44 | WT | ATMKTFCGT[P]   | 12539.59 | 10 | 56.02013 |
| Se006 | AKT1 P313L     | HLA-C*15:02 | MT | GT[L]EYLAPEV   | 434.11 | WT | GT[P]EYLAPEV   | 906.17   | 10 | 56.02013 |
| Se006 | ZFYVE19 A334P  | HLA-A*11:01 | MT | ALAKRL[P]MLR   | 348.84 | WT | ALAKRL[A]MLR   | 289.54   | 10 | 7.64297  |
| Se006 | COX11 M106R    | HLA-A*11:01 | MT | YVAAVAVG[R]    | 422.98 | WT | YVAAVAVG[M]    | 13893.28 | 9  | 9.75824  |
| Se006 | COX11 M106R    | HLA-C*15:02 | MT | YVAAVAVG[R]L   | 462.43 | WT | YVAAVAVG[M]L   | 598.57   | 10 | 9.75824  |
| Se006 | SUPT5H C634S   | HLA-C*15:02 | MT | FV[S]KTRHLVL   | 216.24 | WT | FV[C]KTRHLVL   | 999.98   | 10 | 18.2113  |
| Se006 | SUPT5H C634S   | HLA-C*15:02 | MT | FV[S]KTRHLV    | 322.15 | WT | FV[C]KTRHLV    | 1756.23  | 9  | 18.2113  |
| Se006 | EPS8L1 A251V   | HLA-A*11:01 | MT | LTS[D][V]VALLR | 79.95  | WT | LTS[D][A]VALLR | 121.21   | 10 | 63.71739 |
| Se006 | EPS8L1 A251V   | HLA-C*15:02 | MT | LTS[D][V]VALL  | 88.92  | WT | LTS[D][A]VALL  | 101.23   | 9  | 63.71739 |
| Se006 | EPS8L1 A251V   | HLA-A*11:01 | MT | TSD[V]VALLR    | 377.54 | WT | TSD[A]VALLR    | 245.65   | 9  | 63.71739 |
| Se006 | MMP9 R61H      | HLA-A*11:01 | MT | RVAEM[H]GESK   | 38.07  | WT | RVAEM[R]GESK   | 53.52    | 10 | 3.86019  |
| Se006 | CD40 D183Y     | HLA-B*55:02 | MT | [Y]PVCHPLGA    | 141.29 | WT | [D]PVCHPLGA    | 5857.27  | 9  | 4.34246  |
| Se006 | CSTF1 D263Y    | HLA-A*11:01 | MT | HT[Y]AICSVNY   | 53.28  | WT | HT[D]AICSVNY   | 1139.67  | 10 | 24.43597 |
| Se006 | COL6A2 N968Y   | HLA-C*15:02 | MT | [Y]VVPTVLAL    | 149.01 | WT | [N]VVPTVLAL    | 1886.28  | 9  | 78.12649 |
| Se006 | COL6A2 N968Y   | HLA-C*15:02 | MT | HSMRKQ[Y]VV    | 165.6  | WT | HSMRKQ[N]VV    | 332.69   | 9  | 78.12649 |
| Se006 | COL6A2 N968Y   | HLA-C*01:02 | MT | [Y]VVPTVLAL    | 486.56 | WT | [N]VVPTVLAL    | 4204.22  | 9  | 78.12649 |
| Se006 | INPP5J K287N   | HLA-C*15:02 | MT | YTVSDH[N]PV    | 104.3  | WT | YTVSDH[K]PV    | 235.65   | 9  | 1.45733  |
| Se008 | RERE R465H     | HLA-C*03:04 | MT | KT[H]TASTPV    | 306.38 | WT | KT[R]TASTPV    | 1738.07  | 9  | 11.43886 |
| Se008 | TIMM17A E7D    | HLA-C*03:04 | MT | YAR[D]PCPWRI   | 203.96 | WT | YAR[E]PCPWRI   | 199.6    | 10 | 12.30225 |
| Se008 | HERC5 R663S    | HLA-C*03:04 | MT | KAYL[S]SAAI    | 25.38  | WT | KAYL[R]SAAI    | 40.28    | 9  | 5.09468  |
| Se008 | SLC17A5 L159F  | HLA-C*03:04 | MT | IAAD[F]GVGPL   | 7.51   | WT | IAAD[L]GVGPL   | 8.54     | 10 | 6.92667  |
| Se008 | SLC17A5 L159F  | HLA-C*03:04 | MT | AAD[F]GVGPL    | 47.64  | WT | AAD[L]GVGPL    | 60.47    | 9  | 6.92667  |
| Se008 | SLC17A5 L159F  | HLA-C*03:04 | MT | [F]GVGPLIVL    | 56.12  | WT | [L]GVGPLIVL    | 1101.87  | 9  | 6.92667  |
| Se008 | SLC17A5 L159F  | HLA-A*02:01 | MT | FTPIAAD[F]GV   | 276.87 | WT | FTPIAAD[L]GV   | 846.27   | 10 | 6.92667  |
| Se008 | SLC17A5 L159F  | HLA-B*54:01 | MT | TPIAAD[F]GV    | 286.35 | WT | TPIAAD[L]GV    | 626.72   | 9  | 6.92667  |
| Se008 | COMMD5 P150Q   | HLA-A*02:01 | MT | QQGAWL[Q]HV    | 271.41 | WT | QQGAWL[P]HV    | 55.39    | 9  | 10.39594 |
| Se008 | RABGAP1 H721R  | HLA-A*02:01 | MT | [R]JMYASQWFL   | 4.63   | WT | [H]JMYASQWFL   | 6.09     | 9  | 4.57649  |
| Se008 | RABGAP1 H721R  | HLA-A*02:01 | MT | [R]JMYASQWFLT  | 45.87  | WT | [H]JMYASQWFLT  | 82.93    | 10 | 4.57649  |
| Se008 | RABGAP1 H721R  | HLA-A*02:01 | MT | FLDISLEA[R]M   | 68.07  | WT | FLDISLEA[H]M   | 51.19    | 10 | 4.57649  |
| Se008 | RABGAP1 H721R  | HLA-B*13:01 | MT | [R]JMYASQWFL   | 243.73 | WT | [H]JMYASQWFL   | 413.25   | 9  | 4.57649  |
| Se008 | CPSF6 P276L    | HLA-C*03:04 | MT | [L]VLFPGQPF    | 248.52 | WT | [P]VLFPGQPF    | 9995.41  | 9  | 5.16699  |
| Se008 | NLRC5 K996R    | HLA-C*03:04 | MT | [R]ALGGSCHL    | 74.99  | WT | [K]ALGGSCHL    | 105.47   | 9  | 3.10905  |
| Se008 | TSHZ1 C972W    | HLA-B*54:01 | MT | HPVFF[W]NDCA   | 89.94  | WT | HPVFF[C]NDCA   | 152.82   | 10 | 3.6477   |
| Se008 | LPIN3 N612S    | HLA-A*02:01 | MT | GA[S]DVVFSV    | 61.67  | WT | GA[N]DVVFSV    | 88.47    | 9  | 30.4931  |
| Se008 | LPIN3 N612S    | HLA-A*02:01 | MT | NLQEGA[S]DVV   | 443.91 | WT | NLQEGA[N]DVV   | 597.39   | 10 | 30.4931  |
| Se008 | HLCS D171N     | HLA-C*03:04 | MT | YVGS[N]SQEAL   | 82.27  | WT | YVGS[D]SQEAL   | 145.3    | 10 | 1.97192  |
| Se011 | PUS10 D437N    | HLA-B*40:02 | MT | IEFLNDIK[N]L   | 73.41  | WT | IEFLNDIK[D]L   | 117.59   | 10 | 1.37875  |
| Se011 | C3orf18 L78F   | HLA-A*33:03 | MT | [F]VLYIRKKKR   | 48.05  | WT | [L]VLYIRKKKR   | 137.65   | 10 | 2.71013  |
| Se011 | C3orf18 L78F   | HLA-A*33:03 | MT | AVA[L]VLYIR    | 51.35  | WT | AVA[L]VLYIR    | 122.57   | 9  | 2.71013  |
| Se011 | C3orf18 L78F   | HLA-A*33:03 | MT | LAVA[F]VLYIR   | 130.62 | WT | LAVA[L]VLYIR   | 220.09   | 10 | 2.71013  |
| Se011 | ACAP2 R16G     | HLA-A*33:03 | MT | CLKDSP[G]JFR   | 74.07  | WT | CLKDSP[R]JFR   | 109.95   | 9  | 4.74494  |
| Se011 | G3BP2 V352G    | HLA-B*40:02 | MT | [G]QRILAKPI    | 486.56 | WT | [V]QRILAKPI    | 907.4    | 10 | 15.57736 |
| Se011 | VCAN P1018T    | HLA-B*40:02 | MT | LEATIS[T]JTM   | 127.67 | WT | LEATIS[P]JTM   | 145.57   | 10 | 8.347    |
| Se011 | VCAN P1018T    | HLA-A*33:03 | MT | EATIS[T]JTM    | 310.43 | WT | EATIS[P]JTM    | 454.42   | 10 | 8.347    |

|       |                 |             |    |               |        |    |               |          |    |           |
|-------|-----------------|-------------|----|---------------|--------|----|---------------|----------|----|-----------|
| Se011 | VCAN P1018T     | HLA-A*33:03 | MT | ATIS[T]ETMR   | 366.27 | WT | ATIS[P]ETMR   | 366.02   | 9  | 8.347     |
| Se011 | VCAN P1018T     | HLA-B*44:03 | MT | LEATIS[T]ETM  | 390.44 | WT | LEATIS[P]ETM  | 447.14   | 10 | 8.347     |
| Se011 | VCAN P1018T     | HLA-B*40:02 | MT | LEATIS[T]JET  | 461.79 | WT | LEATIS[P]JET  | 248.24   | 9  | 8.347     |
| Se011 | ZNF300 R253T    | HLA-B*40:02 | MT | SQLIVHQ[T]I   | 83.12  | WT | SQLIVHQ[R]I   | 382.5    | 9  | 5.75622   |
| Se011 | NOTCH4 H260Q    | HLA-B*40:02 | MT | F[Q]LCLCPPGF  | 201.91 | WT | F[H]LCLCPPGF  | 5924.29  | 10 | 13.99709  |
| Se011 | FNDC1 P1094R    | HLA-A*33:03 | MT | DVRA[R]AHAAR  | 17.43  | WT | DVRA[P]AHAAR  | 20.07    | 10 | 19.26966  |
| Se011 | PDK4 G297D      | HLA-A*33:03 | MT | [D]VPLRIIDR   | 441.66 | WT | [G]VPLRIIDR   | 2367.95  | 9  | 11.25033  |
| Se011 | TGS1 R30M       | HLA-A*33:03 | MT | CS[M]AFVEDR   | 281.54 | WT | CS[R]AFVEDR   | 437.38   | 9  | 6.30497   |
| Se011 | KIAA0196 N517S  | HLA-B*40:02 | MT | QEFHQLES[S]L  | 40.77  | WT | QEFHQLES[N]L  | 67.73    | 10 | 11.34288  |
| Se011 | KIAA0196 N517S  | HLA-B*44:03 | MT | LES[S]LQVCQF  | 56.14  | WT | LES[N]LQVCQF  | 69.67    | 10 | 11.34288  |
| Se011 | KIAA0196 N517S  | HLA-B*40:02 | MT | LES[S]LQVCQF  | 209.07 | WT | LES[N]LQVCQF  | 262.2    | 10 | 11.34288  |
| Se011 | MTAP T118P      | HLA-A*33:03 | MT | QFIDRT[P]MR   | 54.42  | WT | QFIDRT[T]MR   | 30.5     | 9  | 3.70714   |
| Se011 | MTAP T118P      | HLA-C*14:03 | MT | RT[P]MRPQSF   | 60.78  | WT | RT[T]MRPQSF   | 274.14   | 9  | 3.70714   |
| Se011 | MTAP T118P      | HLA-A*33:03 | MT | DQFIDRT[P]MR  | 191.93 | WT | DQFIDRT[T]MR  | 155.12   | 10 | 3.70714   |
| Se011 | LIMA1 L30Q      | HLA-C*14:03 | MT | SANENS[Q]AV   | 325.1  | WT | SANENS[L]AV   | 175.19   | 9  | 11.91154  |
| Se011 | ITGA5 Q900E     | HLA-B*40:02 | MT | LELSCP[E]AL   | 48.41  | WT | LELSCP[Q]AL   | 37.66    | 9  | 20.70292  |
| Se011 | CCDC64 D19Y     | HLA-A*24:02 | MT | P[Y]SACCMEL   | 351.44 | WT | P[D]SACCMEL   | 30340.21 | 9  | 7.37295   |
| Se011 | LONP2 R758W     | HLA-A*33:03 | MT | GLKQVIIP[W]R  | 333.07 | WT | GLKQVIIP[R]R  | 445.38   | 10 | 12.47696  |
| Se011 | POLR2A N997S    | HLA-A*33:03 | MT | AQKIFH[S]PR   | 175.93 | WT | AQKIFH[N]PR   | 217.14   | 10 | 15.84306  |
| Se011 | TOP2A N260K     | HLA-A*33:03 | MT | DVKVFLNG[K]   | 385.38 | WT | DVKVFLNG[N]   | 21780.63 | 9  | 3.57104   |
| Se011 | TOP2A N260K     | HLA-C*14:03 | MT | VFLNG[K]KLPV  | 482.3  | WT | VFLNG[N]KLPV  | 227.67   | 10 | 3.57104   |
| Se011 | GGA3 S309C      | HLA-A*33:03 | MT | SDLDF[C]PR    | 449.37 | WT | SDLDF[S]PR    | 367.39   | 9  | 11.31966  |
| Se011 | P2RY11 A87V     | HLA-C*14:03 | MT | TLPLA[A]YL    | 137.16 | WT | TLPLA[A]YL    | 70.45    | 9  | 6.44792   |
| Se011 | P2RY11 A87V     | HLA-A*33:03 | MT | [V]YLYPPKHWR  | 198    | WT | [A]YLYPPKHWR  | 371.5    | 10 | 6.44792   |
| Se011 | P2RY11 A87V     | HLA-A*24:02 | MT | [V]YLYPPKHWR  | 376.19 | WT | [A]YLYPPKHWR  | 786.24   | 9  | 6.44792   |
| Se011 | ILVBL V402M     | HLA-C*14:03 | MT | SF[M]LKLVEGL  | 248.48 | WT | SF[V]LKLVEGL  | 969.36   | 10 | 28.46359  |
| Se011 | ARMC6 M437I     | HLA-A*33:03 | MT | I[I]QARSAHR   | 46.64  | WT | I[M]QARSAHR   | 34.22    | 9  | 12.27747  |
| Se011 | ARMC6 M437I     | HLA-A*33:03 | MT | LI[I]QARSAHR  | 110.05 | WT | LI[M]QARSAHR  | 50.75    | 10 | 12.27747  |
| Se011 | BCAS4 S120P     | HLA-B*40:02 | MT | LEK[P]PAPVPV  | 146.85 | WT | LEK[S]PAPVPV  | 94.03    | 10 | 6.89005   |
| Se011 | MYH9 A849V      | HLA-B*40:02 | MT | EEMM[V]KEEEL  | 297.47 | WT | EEMM[A]KEEEL  | 330.82   | 10 | 117.41755 |
| Se015 | TMEM57 G160W    | HLA-A*02:01 | MT | FAAHC[W]YYPV  | 4.02   | WT | FAAHC[G]YYPV  | 15.9     | 10 | 4.96634   |
| Se015 | TMEM57 G160W    | HLA-A*24:02 | MT | [W]YYPVVTGFG  | 30.6   | WT | [G]YYPVVTGFG  | 55.31    | 9  | 4.96634   |
| Se015 | TMEM57 G160W    | HLA-A*24:02 | MT | I[W]YYPVVTGFG | 49.88  | WT | I[G]YYPVVTGFG | 1583.7   | 10 | 4.96634   |
| Se015 | TMEM57 G160W    | HLA-A*02:01 | MT | AAHC[W]YYPV   | 60.08  | WT | AAHC[G]YYPV   | 274.16   | 9  | 4.96634   |
| Se015 | TMEM57 G160W    | HLA-B*55:02 | MT | FAAHC[W]YYPV  | 156.29 | WT | FAAHC[G]YYPV  | 175.79   | 10 | 4.96634   |
| Se015 | TMEM57 G160W    | HLA-A*02:01 | MT | CI[W]YYPVVTL  | 356.92 | WT | CI[G]YYPVVTL  | 2540.76  | 9  | 4.96634   |
| Se015 | PDZK1IP1 T13R   | HLA-A*02:01 | MT | GLL[R]AVPPA   | 15.01  | WT | GLL[T]AVPPA   | 8.69     | 9  | 16.0077   |
| Se015 | PDZK1IP1 T13R   | HLA-A*02:01 | MT | LLILGLL[R]AV  | 31.32  | WT | LLILGLL[T]AV  | 11.66    | 10 | 16.0077   |
| Se015 | PDZK1IP1 T13R   | HLA-A*02:01 | MT | LILGLL[R]AV   | 120.93 | WT | LILGLL[T]AV   | 17.33    | 9  | 16.0077   |
| Se015 | PDZK1IP1 T13R   | HLA-A*02:01 | MT | LLILGLL[R]A   | 301.84 | WT | LLILGLL[T]A   | 168.36   | 9  | 16.0077   |
| Se015 | EFCAB7 L497M    | HLA-A*02:01 | MT | E[M]TEACPFV   | 100.78 | WT | E[L]TEACPFV   | 93.56    | 9  | 6.40448   |
| Se015 | HLX H75Y        | HLA-A*02:01 | MT | ALTA[Y]LGSV   | 17.48  | WT | ALTA[H]LGSV   | 33.07    | 9  | 1.75755   |
| Se015 | HLX H75Y        | HLA-A*02:01 | MT | [Y]LGSVHPHA   | 23.01  | WT | [H]LGSVHPHA   | 742.38   | 9  | 1.75755   |
| Se015 | PAX8 P139R      | HLA-B*07:02 | MT | KVQQ[R]FNLPM  | 248.02 | WT | KVQQ[P]FNLPM  | 414.45   | 10 | 70.19397  |
| Se015 | GLI2 G109S      | HLA-B*07:02 | MT | HPA[S]JGESPF  | 15.76  | WT | HPA[G]JGESPF  | 17.32    | 10 | 4.11031   |
| Se015 | ITPR1 S159P     | HLA-B*07:02 | MT | G[P]WFIQPF    | 285.63 | WT | G[S]WFIQPF    | 19427.69 | 9  | 1.61271   |
| Se015 | ABI3BP S516P    | HLA-B*07:02 | MT | I[P]LKPQIPL   | 10.24  | WT | I[S]LKPQIPL   | 5452.88  | 9  | 4.14972   |
| Se015 | ABI3BP S516P    | HLA-B*07:02 | MT | APGKTQF[P]L   | 18.24  | WT | APGKTQF[S]L   | 21.46    | 10 | 4.14972   |
| Se015 | ATR N2342H      | HLA-A*02:01 | MT | RLMEF[H]SLI   | 5.56   | WT | RLMEF[N]SLI   | 4.81     | 9  | 4.3511    |
| Se015 | ZNF354B G584V   | HLA-B*07:02 | MT | KPYECNAC[V]   | 481.07 | WT | KPYECNAC[G]   | 9734.77  | 9  | 5.6748    |
| Se015 | STK3 D316N      | HLA-A*02:01 | MT | NVFP[N]NWKV   | 43.87  | WT | NVFP[D]NWKV   | 55.93    | 9  | 6.74835   |
| Se015 | STK3 D316N      | HLA-B*55:02 | MT | FPMSKNVFP[N]  | 171.51 | WT | FPMSKNVFP[D]  | 285.87   | 10 | 6.74835   |
| Se015 | PTPRD R1378S    | HLA-B*07:02 | MT | MPQYIL[S]JEF  | 36.8   | WT | MPQYIL[R]JEF  | 37.5     | 9  | 4.23352   |
| Se015 | PTPRD R1378S    | HLA-A*24:02 | MT | NMPQYIL[S]JEF | 209.89 | WT | NMPQYIL[R]JEF | 330.09   | 10 | 4.23352   |
| Se015 | PTPRD R1378S    | HLA-A*02:01 | MT | IL[S]JEFKVTDA | 229.6  | WT | IL[R]JEFKVTDA | 2762.54  | 10 | 4.23352   |
| Se015 | PTPRD R1378S    | HLA-B*55:02 | MT | MPQYIL[S]JEF  | 391.89 | WT | MPQYIL[R]JEF  | 884.08   | 9  | 4.23352   |
| Se015 | PTPRD A1205E    | HLA-A*02:01 | MT | FIHDALLE[E]V  | 5.48   | WT | FIHDALLE[A]V  | 6.66     | 10 | 4.23352   |
| Se015 | AGTPBP1 V360I   | HLA-A*02:01 | MT | CLA[I]RTLDP   | 425.91 | WT | CLA[V]RTLDP   | 397.15   | 10 | 5.20939   |
| Se015 | ZNF503 S47W     | HLA-B*07:02 | MT | GPGPG[W]SPA   | 100.88 | WT | GPGPG[S]SPA   | 99.62    | 9  | 30.69099  |
| Se015 | ATL3 V434L      | HLA-A*02:01 | MT | VLFTGI[L]AL   | 12.71  | WT | VLFTGI[V]AL   | 9.76     | 9  | 5.64603   |
| Se015 | ATL3 V434L      | HLA-A*02:01 | MT | I[L]ALYASGL   | 29.67  | WT | I[V]ALYASGL   | 429.91   | 10 | 5.64603   |
| Se015 | ATL3 V434L      | HLA-B*07:02 | MT | TPAVLFTGI[L]  | 45.55  | WT | TPAVLFTGI[V]  | 295.07   | 10 | 5.64603   |
| Se015 | TRPT1 G54A      | HLA-A*02:01 | MT | GLPMGAD[A]FV  | 121.99 | WT | GLPMGAD[G]FV  | 637.25   | 10 | 16.8251   |
| Se015 | TRPT1 G54A      | HLA-B*55:02 | MT | LPMGAD[A]FV   | 165.43 | WT | LPMGAD[G]FV   | 305.73   | 9  | 16.8251   |
| Se015 | TRPT1 G54A      | HLA-B*07:02 | MT | LPMGAD[A]FV   | 434.52 | WT | LPMGAD[G]FV   | 356.66   | 9  | 16.8251   |
| Se015 | ADAMTS8 L239Q   | HLA-A*24:02 | MT | FYGAD[L]QNH   | 344.76 | WT | FYGAD[L]QNH   | 116.02   | 10 | 2.3388    |
| Se015 | GPATCH2L S62I   | HLA-A*02:01 | MT | HLEHTCCY[I]   | 17.39  | WT | HLEHTCCY[S]   | 805.01   | 10 | 1.49887   |
| Se015 | GPATCH2L S62I   | HLA-A*24:02 | MT | CY[I]EASESSL  | 192.22 | WT | CY[S]EASESSL  | 662.26   | 10 | 1.49887   |
| Se015 | SMG1 P2599R     | HLA-A*24:02 | MT | SYV[R]ATAFL   | 33.41  | WT | SYV[P]ATAFL   | 26.22    | 9  | 4.86528   |
| Se015 | SMG1 P2599R     | HLA-C*07:02 | MT | SYV[R]ATAFL   | 155.44 | WT | SYV[P]ATAFL   | 45.56    | 9  | 4.86528   |
| Se015 | KIAA0556 A1326G | HLA-C*07:02 | MT | YRG[G]KIVHV   | 302.16 | WT | YRG[A]KIVHV   | 193.62   | 9  | 2.88693   |
| Se015 | PRSS53 C249Y    | HLA-A*02:01 | MT | GISSFASS[Y]A  | 361.43 | WT | GISSFASS[C]A  | 1706.6   | 10 | 8.45197   |
| Se015 | SHPK N325I      | HLA-A*02:01 | MT | SLNGG[I]VLA   | 53.97  | WT | SLNGG[N]VLA   | 379.51   | 9  | 3.6477    |
| Se015 | SHPK N325I      | HLA-A*02:01 | MT | [I]VLATFVHML  | 224.27 | WT | [N]VLATFVHML  | 459.65   | 10 | 3.6477    |
| Se015 | SHPK N325I      | HLA-A*02:01 | MT | SLNGG[I]VLAT  | 433    | WT | SLNGG[N]VLAT  | 1813.74  | 10 | 3.6477    |
| Se015 | KDM6B S1192R    | HLA-A*24:02 | MT | IYLE[R]KRDAF  | 188.73 | WT | IYLE[S]KRDAF  | 134.49   | 10 | 7.66861   |
| Se015 | KDM6B S1192R    | HLA-C*07:02 | MT | IYLE[R]KRDAF  | 242.09 | WT | IYLE[S]KRDAF  | 456.43   | 10 | 7.66861   |
| Se015 | C1QL1 P60A      | HLA-A*02:01 | MT | ALSEQSGAP[A]  | 174.12 | WT | ALSEQSGAP[P]  | 10312.57 | 10 | 2.80131   |

|       |                |             |    |              |        |    |              |          |    |          |
|-------|----------------|-------------|----|--------------|--------|----|--------------|----------|----|----------|
| Se015 | TPGS2 G33C     | HLA-A*02:01 | MT | RILESSP[C]V  | 29.04  | WT | RILESSP[G]V  | 13.02    | 9  | 26.59555 |
| Se015 | MALT1 G170R    | HLA-B*07:02 | MT | IPN[R]NTSEL  | 6.63   | WT | IPN[G]NTSEL  | 10.31    | 9  | 5.30737  |
| Se015 | MALT1 G170R    | HLA-B*07:02 | MT | IPN[R]NTSELI | 280.03 | WT | IPN[G]NTSELI | 362.33   | 10 | 5.30737  |
| Se015 | MAST1 I324N    | HLA-B*07:02 | MT | IPRY[N]IRQL  | 6.65   | WT | IPRY[I]IRQL  | 11.91    | 9  | 1.21895  |
| Se015 | AKAP8L A521V   | HLA-A*02:01 | MT | GISEG[V]EGV  | 65.54  | WT | GISEG[A]EGV  | 327.55   | 9  | 68.30659 |
| Se015 | CSEIL D302A    | HLA-B*07:02 | MT | VPNMEFRAA[A] | 95.17  | WT | VPNMEFRAA[D] | 6737.78  | 10 | 41.89837 |
| Se015 | CSEIL D302A    | HLA-B*55:02 | MT | VPNMEFRAA[A] | 200.55 | WT | VPNMEFRAA[D] | 14694.76 | 10 | 41.89837 |
| Se015 | STAR8 P227R    | HLA-B*07:02 | MT | VPGDHK[R]GTF | 121.78 | WT | VPGDHK[P]GTF | 413.61   | 10 | 1.10031  |
| Se015 | CENP1 V32L     | HLA-A*02:01 | MT | FQTTL5AWK[L] | 159.93 | WT | FQTTL5AWK[V] | 42.78    | 10 | 2.49061  |
| Se015 | BCORL1 A849V   | HLA-A*02:01 | MT | SLLSIGISS[V] | 9.7    | WT | SLLSIGISS[A] | 59.82    | 10 | 3.28274  |
| Se015 | BCORL1 A849V   | HLA-A*02:01 | MT | LLSIGISS[V]  | 19.43  | WT | LLSIGISS[A]  | 162.46   | 9  | 3.28274  |
| Se015 | ELF4 R270T     | HLA-C*07:02 | MT | [T]YYYQRGIL  | 346.57 | WT | [R]YYYQRGIL  | 557.42   | 9  | 6.66268  |
| Se016 | KDF1 T272N     | HLA-A*11:01 | MT | TVFLEK[N]JSK | 55.2   | WT | TVFLEK[T]JSK | 41.88    | 9  | 6.89449  |
| Se016 | CELSR2 A2769G  | HLA-B*67:01 | MT | GPG[G]ERLPL  | 181.75 | WT | GPG[A]ERLPL  | 179.9    | 9  | 19.95089 |
| Se016 | ZBTB18 L78Q    | HLA-B*67:01 | MT | APAFAL[Q]LEF | 134.74 | WT | APAFAL[L]LEF | 113.16   | 10 | 6.60025  |
| Se016 | ZBTB18 L78Q    | HLA-A*11:01 | MT | L[Q]LEFMYEGK | 158.09 | WT | L[L]LEFMYEGK | 125.33   | 10 | 6.60025  |
| Se016 | PXDN R662P     | HLA-B*67:01 | MT | F[P]YPRDPYTV | 11.3   | WT | F[R]YPRDPYTV | 7923.34  | 10 | 32.65849 |
| Se016 | PXDN R662P     | HLA-A*11:01 | MT | LLALF[R]YPR  | 130.09 | WT | LLALF[R]YPR  | 134.22   | 9  | 32.65849 |
| Se016 | PXDN R662P     | HLA-B*67:01 | MT | F[P]YPRDPYT  | 168.93 | WT | F[R]YPRDPYT  | 19498.64 | 9  | 32.65849 |
| Se016 | IWS1 T651S     | HLA-B*67:01 | MT | LPSVSQE[S]L  | 24.34  | WT | LPSVSQE[T]L  | 27.67    | 9  | 11.0938  |
| Se016 | DNAH7 E85Q     | HLA-A*11:01 | MT | A[Q]YMERFGK  | 30.8   | WT | A[E]YMERFGK  | 3418.14  | 9  | 3.10616  |
| Se016 | DNAH7 E85Q     | HLA-A*11:01 | MT | A[Q]YMERFGKK | 74.46  | WT | A[E]YMERFGKK | 7247.32  | 10 | 3.10616  |
| Se016 | DNAH7 E85Q     | HLA-A*11:01 | MT | HA[Q]YMERFGK | 250.55 | WT | HA[E]YMERFGK | 760.44   | 10 | 3.10616  |
| Se016 | ZNF197 A495T   | HLA-A*11:01 | MT | N[T]YLIDHQR  | 328.15 | WT | N[A]YLIDHQR  | 1582.66  | 9  | 4.0747   |
| Se016 | ZNF197 P509H   | HLA-A*11:01 | MT | RLHKGEE[H]YK | 185.06 | WT | RLHKGEE[P]YK | 168.05   | 10 | 4.0747   |
| Se016 | DHX29 A869V    | HLA-C*07:02 | MT | FRNIEG[A]VL  | 148.11 | WT | FRNIEG[A]VL  | 222.03   | 9  | 5.63613  |
| Se016 | DHX29 A869V    | HLA-C*07:02 | MT | FRNIEG[V]VLI | 204.85 | WT | FRNIEG[A]VLI | 269.51   | 10 | 5.63613  |
| Se016 | DHX29 A869V    | HLA-B*67:01 | MT | SPQFRNIEG[V] | 307.42 | WT | SPQFRNIEG[A] | 894.58   | 10 | 5.63613  |
| Se016 | PPP2R2B R251W  | HLA-A*11:01 | MT | GTI[Q]LCDMR  | 364.27 | WT | GTI[R]LCDMR  | 773.49   | 9  | 4.32749  |
| Se016 | PPP2R2B R251W  | HLA-B*67:01 | MT | [W]LCDMRASAL | 495.68 | WT | [R]LCDMRASAL | 1365.68  | 10 | 4.32749  |
| Se016 | GABBR1 R51G    | HLA-B*67:01 | MT | HPSSER[G]AV  | 34.83  | WT | HPSSER[R]AV  | 38.56    | 9  | 15.36934 |
| Se016 | GABBR1 R51G    | HLA-B*67:01 | MT | HPSSER[G]AVY | 450.43 | WT | HPSSER[R]AVY | 627.75   | 10 | 15.36934 |
| Se016 | BTAF1 V827M    | HLA-A*11:01 | MT | Q[M]LQQLDSK  | 329.61 | WT | Q[V]LQQLDSK  | 295.17   | 9  | 14.14292 |
| Se016 | MORN4 L47P     | HLA-B*67:01 | MT | G[P]FNGFGVL  | 60.01  | WT | G[L]FNGFGVL  | 4722.19  | 9  | 4.19505  |
| Se016 | MAP4K2 L504V   | HLA-C*07:02 | MT | IY[T]VNLHEL  | 254.27 | WT | IY[T]LNLHEL  | 226.13   | 9  | 4.28979  |
| Se016 | C11orf63 Q98H  | HLA-A*11:01 | MT | ASGKAA[H]MAR | 447.86 | WT | ASGKAA[Q]MAR | 712.81   | 10 | 2.95711  |
| Se016 | CHPT1 R33C     | HLA-C*07:02 | MT | [C]YSAAGVSL  | 407.52 | WT | [R]YSAAGVSL  | 411.09   | 10 | 3.06556  |
| Se016 | HEATR5A A1304P | HLA-B*67:01 | MT | F[P]TVPEPEF  | 36.84  | WT | F[A]TVPEPEF  | 1727.76  | 9  | 3.07875  |
| Se016 | ZIK1 K386T     | HLA-A*11:01 | MT | GQCG[K]SFSQK | 221.23 | WT | GQCG[K]SFSQK | 307.14   | 10 | 1.94334  |
| Se016 | SPATC1L N140K  | HLA-B*67:01 | MT | [K]PLHSSPAAL | 19.64  | WT | [N]PLHSSPAAL | 8.57     | 10 | 4.2725   |
| Se016 | SPATC1L N140K  | HLA-B*67:01 | MT | RPDLRA[K]PL  | 46.54  | WT | RPDLRA[N]PL  | 13.18    | 9  | 4.2725   |
| Se016 | SPATC1L N140K  | HLA-B*67:01 | MT | [K]PLHSSPAA  | 447.1  | WT | [N]PLHSSPAA  | 153.93   | 9  | 4.2725   |
| Se016 | MTMR1 S270I    | HLA-B*67:01 | MT | YPAIIVVPT[I] | 14.44  | WT | YPAIIVVPT[S] | 184.14   | 10 | 17.6301  |
| Se016 | MTMR1 S270I    | HLA-A*11:01 | MT | AIVVPT[I]VK  | 45.43  | WT | AIVVPT[S]VK  | 43.56    | 10 | 17.6301  |
| Se016 | MTMR1 S270I    | HLA-A*11:01 | MT | IIVVPT[I]VK  | 71.86  | WT | IIVVPT[S]VK  | 106.39   | 9  | 17.6301  |
| Se016 | MTMR1 S270I    | HLA-A*11:01 | MT | [I]VKDDDLK   | 469.33 | WT | [S]VKDDDLK   | 196.3    | 9  | 17.6301  |
| Se016 | MTMR1 S270I    | HLA-A*11:01 | MT | T[I]VKDDDLK  | 493.15 | WT | T[S]VKDDDLK  | 919.32   | 10 | 17.6301  |
| Se020 | ZFYVE9 P802T   | HLA-B*07:02 | MT | SP[T]PTVMVPV | 40.88  | WT | SP[P]PTVMVPV | 162.72   | 10 | 3.02643  |
| Se020 | ZFYVE9 P802T   | HLA-C*03:04 | MT | LSSP[T]PTVM  | 41.73  | WT | LSSP[P]PTVM  | 47.93    | 9  | 3.02643  |
| Se020 | ZFYVE9 P802T   | HLA-C*03:04 | MT | ALSSP[T]PTVM | 173.9  | WT | ALSSP[P]PTVM | 184.05   | 10 | 3.02643  |
| Se020 | ZFYVE9 P802T   | HLA-C*03:04 | MT | GALSSP[T]PTV | 435.27 | WT | GALSSP[P]PTV | 674.75   | 10 | 3.02643  |
| Se020 | RSBN1 M49T     | HLA-B*40:02 | MT | GE[T]AAQVGAV | 67.76  | WT | GE[M]AAQVGAV | 12.04    | 10 | 1.37684  |
| Se020 | RSBN1 M49T     | HLA-B*40:02 | MT | GE[T]AAQVGA  | 186.67 | WT | GE[M]AAQVGA  | 22.64    | 9  | 1.37684  |
| Se020 | SV2A R334K     | HLA-B*40:02 | MT | YQFHSW[K]VF  | 64.06  | WT | YQFHSW[R]VF  | 38.75    | 9  | 3.22151  |
| Se020 | SV2A R334K     | HLA-A*31:01 | MT | SAYQFHSW[K]  | 125.29 | WT | SAYQFHSW[R]  | 9.01     | 9  | 3.22151  |
| Se020 | SV2A R334K     | HLA-B*40:02 | MT | YQFHSW[K]VFV | 229.28 | WT | YQFHSW[R]VFV | 138.15   | 10 | 3.22151  |
| Se020 | SV2A R334K     | HLA-C*03:04 | MT | YQFHSW[K]VF  | 284.87 | WT | YQFHSW[R]VF  | 105.59   | 9  | 3.22151  |
| Se020 | SV2A R334K     | HLA-A*31:01 | MT | GSAYQFHSW[K] | 419.46 | WT | GSAYQFHSW[R] | 22.08    | 10 | 3.22151  |
| Se020 | SV2A R334K     | HLA-C*03:04 | MT | SAYQFHSW[K]V | 474.84 | WT | SAYQFHSW[R]V | 407.34   | 10 | 3.22151  |
| Se020 | YY1AP1 T421I   | HLA-B*07:02 | MT | [I]PAQSTHSEA | 47.07  | WT | [T]PAQSTHSEA | 139.42   | 10 | 22.42945 |
| Se020 | SLC30A1 I101S  | HLA-B*40:02 | MT | [S]ERFIEPHEM | 229.82 | WT | [I]ERFIEPHEM | 425.7    | 10 | 29.3467  |
| Se020 | MEIS1 V319L    | HLA-A*31:01 | MT | Q[L]NNWFINAR | 20.53  | WT | Q[V]NNWFINAR | 15.39    | 10 | 6.42728  |
| Se020 | MEIS1 V319L    | HLA-A*31:01 | MT | [L]NNWFINARR | 40.57  | WT | [V]NNWFINARR | 34.82    | 10 | 6.42728  |
| Se020 | MEIS1 V319L    | HLA-A*31:01 | MT | [L]NNWFINAR  | 41.7   | WT | [V]NNWFINAR  | 34.97    | 9  | 6.42728  |
| Se020 | DGUOK R30T     | HLA-A*31:01 | MT | SSS[T]GLHAGR | 64.5   | WT | SSS[R]GLHAGR | 52.66    | 10 | 15.41526 |
| Se020 | DGUOK R30T     | HLA-A*31:01 | MT | SS[T]GLHAGR  | 78.41  | WT | SS[R]GLHAGR  | 15.03    | 9  | 15.41526 |
| Se020 | DGUOK R30T     | HLA-B*07:02 | MT | SPLEGVSSS[T] | 224.47 | WT | SPLEGVSSS[R] | 9741.52  | 10 | 15.41526 |
| Se020 | DGUOK R30T     | HLA-B*40:02 | MT | LEGVSSS[T]GL | 337.33 | WT | LEGVSSS[R]GL | 556.29   | 10 | 15.41526 |
| Se020 | DGUOK R30T     | HLA-A*31:01 | MT | [T]GLHAGRPR  | 445.7  | WT | [R]GLHAGRPR  | 64.97    | 10 | 15.41526 |
| Se020 | BAZ2B G85A     | HLA-C*03:04 | MT | SASS[A]HSEF  | 25.31  | WT | SASS[G]HSEF  | 24.1     | 9  | 3.24373  |
| Se020 | BAZ2B G85A     | HLA-C*03:04 | MT | HSASS[A]HSEF | 85.63  | WT | HSASS[G]HSEF | 89.28    | 10 | 3.24373  |
| Se020 | BAZ2B G85A     | HLA-C*03:04 | MT | S[A]HSEFGGL  | 448.6  | WT | S[G]HSEFGGL  | 10925.95 | 9  | 3.24373  |
| Se020 | GPR155 Y803H   | HLA-B*40:02 | MT | DEYLF[H]RFL  | 174.02 | WT | DEYLF[Y]RFL  | 227.25   | 9  | 1.29953  |
| Se020 | GPR155 Y803H   | HLA-A*31:01 | MT | EFRDEYLF[H]R | 182.11 | WT | EFRDEYLF[Y]R | 61.63    | 10 | 1.29953  |
| Se020 | GPR155 Y803H   | HLA-A*31:01 | MT | YLF[H]RFLQK  | 186.34 | WT | YLF[Y]RFLQK  | 215.87   | 9  | 1.29953  |
| Se020 | GPR155 Y803H   | HLA-C*07:02 | MT | FRDEYLF[H]RF | 206.02 | WT | FRDEYLF[Y]RF | 201.56   | 10 | 1.29953  |
| Se020 | GPR155 Y803H   | HLA-A*31:01 | MT | EYLF[H]RFLQK | 453.48 | WT | EYLF[Y]RFLQK | 305      | 10 | 1.29953  |
| Se020 | FRZB G283S     | HLA-A*31:01 | MT | KWKDRL[S]KK  | 254.37 | WT | KWKDRL[G]KK  | 623.76   | 9  | 75.05641 |



|       |                |             |    |              |        |    |              |          |    |           |
|-------|----------------|-------------|----|--------------|--------|----|--------------|----------|----|-----------|
| Se020 | COQ10B K116R   | HLA-A*31:01 | MT | IS[R]RSGYCK  | 289.11 | WT | IS[K]RSGYCK  | 288.09   | 9  | 16.7069   |
| Se020 | KANSL1L L705S  | HLA-A*31:01 | MT | AQL[S]QGRKKR | 350.52 | WT | AQL[L]QGRKKR | 529.43   | 10 | 1.34887   |
| Se020 | COL6A3 G1374C  | HLA-A*31:01 | MT | RALILV[C]LER | 23.5   | WT | RALILV[G]LER | 36.22    | 10 | 324.12365 |
| Se020 | COL6A3 G1374C  | HLA-A*31:01 | MT | ALILV[C]LER  | 314.32 | WT | ALILV[G]LER  | 575.12   | 9  | 324.12365 |
| Se020 | COL6A3 G1374C  | HLA-A*31:01 | MT | [C]LERVVNLER | 471.62 | WT | [G]LERVVNLER | 659.39   | 10 | 324.12365 |
| Se020 | DCP1A L35Q     | HLA-A*31:01 | MT | VA[Q]YTFCPK  | 339.44 | WT | VA[L]YTFCPK  | 221.69   | 9  | 5.18008   |
| Se020 | FLNB E753Q     | HLA-A*31:01 | MT | KVFGPGV[Q]R  | 12.56  | WT | KVFGPGV[E]R  | 14.71    | 9  | 9.09383   |
| Se020 | FLNB E753Q     | HLA-B*07:02 | MT | GGPV[Q]RSGL  | 62.55  | WT | GGPV[E]RSGL  | 299.7    | 9  | 9.09383   |
| Se020 | GTPBP8 Y95N    | HLA-A*31:01 | MT | RID[N]VSSAVR | 174.45 | WT | RID[Y]VSSAVR | 118.45   | 10 | 1.48104   |
| Se020 | PPP2R3A C67S   | HLA-A*31:01 | MT | ASKFI[S]LLAK | 239.27 | WT | ASKFI[C]LLAK | 169.58   | 10 | 1.49052   |
| Se020 | FOXL2 A216V    | HLA-B*07:02 | MT | SPMPY[V]SCQM | 15.04  | WT | SPMPY[A]SCQM | 11.99    | 10 | 1.65772   |
| Se020 | FOXL2 A216V    | HLA-B*07:02 | MT | MPY[V]SCQMAA | 67.68  | WT | MPY[A]SCQMAA | 47.42    | 10 | 1.65772   |
| Se020 | FOXL2 A216V    | HLA-C*03:04 | MT | Y[V]SCQMAAA  | 447.48 | WT | Y[A]SCQMAAA  | 58.04    | 9  | 1.65772   |
| Se020 | FOXL2 A216V    | HLA-B*07:02 | MT | MPY[V]SCQMA  | 477.71 | WT | MPY[A]SCQMA  | 291.89   | 9  | 1.65772   |
| Se020 | FOXL2 A216V    | HLA-C*03:04 | MT | SPMPY[V]SCQM | 484.57 | WT | SPMPY[A]SCQM | 491.91   | 10 | 1.65772   |
| Se020 | FOXL2 A216V    | HLA-C*03:04 | MT | Y[V]SCQMAAAA | 495.14 | WT | Y[A]SCQMAAAA | 62.93    | 10 | 1.65772   |
| Se020 | DCP2 D106V     | HLA-B*40:02 | MT | [V]ETLENVLL  | 243.62 | WT | [D]ETLENVLL  | 2140.72  | 9  | 1.56667   |
| Se020 | DCP2 D106V     | HLA-C*03:04 | MT | YGAIIL[V]ETL | 306.22 | WT | YGAIIL[D]ETL | 547.08   | 10 | 1.56667   |
| Se020 | DCP2 D106V     | HLA-B*40:02 | MT | [V]ETLENVLLV | 474.11 | WT | [D]ETLENVLLV | 4349.37  | 10 | 1.56667   |
| Se020 | SPARC T27K     | HLA-B*40:02 | MT | [K]EVVEETVA  | 478.72 | WT | [T]EVVEETVA  | 2477.56  | 9  | 3128.549  |
| Se020 | COL12A1 D652G  | HLA-B*07:02 | MT | KP[G]TPYITIV | 215.31 | WT | KP[D]TPYITIV | 399.81   | 10 | 132.65292 |
| Se020 | DLX5 S113R     | HLA-A*31:01 | MT | GGAYNRVP[R]  | 139.42 | WT | GGAYNRVP[S]  | 25251.46 | 9  | 3.98847   |
| Se020 | DLX5 S113R     | HLA-B*07:02 | MT | VP[R]ATNQPE  | 393.45 | WT | VP[S]ATNQPE  | 4364.6   | 9  | 3.98847   |
| Se020 | DLX5 S113R     | HLA-A*31:01 | MT | YGGAYNRVP[R] | 491.95 | WT | YGGAYNRVP[S] | 31059.82 | 10 | 3.98847   |
| Se020 | TMEM130 S380P  | HLA-C*03:04 | MT | VADDFD[F]JPM | 56.05  | WT | VADDFD[S]JPM | 24.72    | 9  | 4.34538   |
| Se020 | ZNF862 P184T   | HLA-A*31:01 | MT | G[T]FKVETLK  | 268.02 | WT | G[P]FKVETLK  | 13967.73 | 9  | 2.24135   |
| Se020 | VPS13B L3454I  | HLA-B*40:02 | MT | VEICCGDLQ[I] | 84.66  | WT | VEICCGDLQ[L] | 52.38    | 10 | 2.76884   |
| Se020 | COL15A1 N807I  | HLA-C*03:04 | MT | KVLSNSLI[I]  | 411.74 | WT | KVLSNSLI[N]  | 26588.34 | 9  | 36.25336  |
| Se020 | DOCK1 D1534N   | HLA-C*03:04 | MT | HL[D]DPSLPI  | 101.89 | WT | HL[D]DPSLPI  | 331.01   | 9  | 11.68187  |
| Se020 | UEVLD H333R    | HLA-A*31:01 | MT | KLQSSASSI[R] | 73.48  | WT | KLQSSASSI[H] | 11756.41 | 10 | 1.92944   |
| Se020 | UEVLD H333R    | HLA-C*03:04 | MT | SSASSI[R]SL  | 96.71  | WT | SSASSI[H]SL  | 66.77    | 9  | 1.92944   |
| Se020 | UEVLD H333R    | HLA-C*07:02 | MT | I[R]SLQQQLKL | 435.33 | WT | I[H]SLQQQLKL | 8259.89  | 10 | 1.92944   |
| Se020 | UEVLD H333R    | HLA-C*03:04 | MT | SSI[R]SLQQQL | 479.81 | WT | SSI[H]SLQQQL | 294.83   | 10 | 1.92944   |
| Se020 | MRGPRF R75S    | HLA-C*03:04 | MT | FSIK[S]NPFIS | 27.54  | WT | FSIK[R]NPFIS | 36.64    | 10 | 16.72063  |
| Se020 | MRGPRF R75S    | HLA-C*03:04 | MT | FGFSIK[S]NPF | 107.69 | WT | FGFSIK[R]NPF | 223.64   | 10 | 16.72063  |
| Se020 | MRGPRF R75S    | HLA-A*31:01 | MT | K[S]NPFISYFL | 333.1  | WT | K[R]NPFISYFL | 4157.46  | 10 | 16.72063  |
| Se020 | MCAM K613N     | HLA-C*03:04 | MT | LVVEV[N]SDKL | 444.08 | WT | LVVEV[K]SDKL | 1422.4   | 10 | 123.80076 |
| Se020 | ROBO3 V254E    | HLA-C*03:04 | MT | SAAAEVM[E]L  | 16.83  | WT | SAAAEVM[V]L  | 20.4     | 9  | 5.30803   |
| Se020 | ROBO3 V254E    | HLA-B*40:02 | MT | M[E]LERPSFL  | 69.53  | WT | M[V]LERPSFL  | 21718.73 | 9  | 5.30803   |
| Se020 | ROBO3 V254E    | HLA-A*31:01 | MT | M[E]LERPSFLR | 217.47 | WT | M[V]LERPSFLR | 9.32     | 10 | 5.30803   |
| Se020 | ARHGAP9 W11C   | HLA-B*07:02 | MT | WPSS[C]GILGL | 39.21  | WT | WPSS[W]GILGL | 36.75    | 10 | 5.17517   |
| Se020 | SLC26A10 T246N | HLA-A*31:01 | MT | CF[N]SSVDTR  | 128.52 | WT | CF[T]SSVDTR  | 316.59   | 9  | 5.21588   |
| Se020 | MON2 E984D     | HLA-C*07:02 | MT | YFFQRG[E]TI  | 122.73 | WT | YFFQRG[E]TI  | 93.79    | 9  | 3.1421    |
| Se020 | CHD8 D1952N    | HLA-C*03:04 | MT | MQ[N]PDFSFL  | 369.92 | WT | MQ[D]PDFSFL  | 578.88   | 9  | 4.07936   |
| Se020 | CHD8 D1952N    | HLA-B*07:02 | MT | [N]PDFSFLAA  | 472.11 | WT | [D]PDFSFLAA  | 3851.91  | 9  | 4.07936   |
| Se020 | CHD8 D1952N    | HLA-B*40:02 | MT | MQ[N]PDFSFL  | 481.17 | WT | MQ[D]PDFSFL  | 1126.68  | 9  | 4.07936   |
| Se020 | MGAT2 D199N    | HLA-B*07:02 | MT | CPR[N]LPKNAA | 87.17  | WT | CPR[D]LPKNAA | 186.33   | 10 | 8.95797   |
| Se020 | MGAT2 D199N    | HLA-A*31:01 | MT | R[N]LPKNAALK | 201.14 | WT | R[D]LPKNAALK | 3629.06  | 10 | 8.95797   |
| Se020 | NDN T271N      | HLA-B*40:02 | MT | REI[I]KMQIM  | 38.41  | WT | REI[T]KMQIM  | 49.71    | 9  | 21.56102  |
| Se020 | NDN T271N      | HLA-C*07:02 | MT | SRASREI[N]KM | 401.85 | WT | SRASREI[T]KM | 313.4    | 10 | 21.56102  |
| Se020 | NDN T271N      | HLA-A*31:01 | MT | GSRASREI[N]K | 487    | WT | GSRASREI[T]K | 591.71   | 10 | 21.56102  |
| Se020 | NUSAP1 Y340C   | HLA-A*31:01 | MT | RINFYKKT[C]K | 92.3   | WT | RINFYKKT[Y]K | 24.35    | 10 | 2.37937   |
| Se020 | UBR1 D1142H    | HLA-B*40:02 | MT | GEAL[H]PLFM  | 100.32 | WT | GEAL[D]PLFM  | 310.26   | 9  | 3.14724   |
| Se020 | UBR1 D1142H    | HLA-B*07:02 | MT | [H]PLFMDPDL  | 204.09 | WT | [D]PLFMDPDL  | 7458.18  | 9  | 3.14724   |
| Se020 | UBR1 D1142H    | HLA-C*03:04 | MT | LSGEAL[H]JPL | 377.61 | WT | LSGEAL[D]JPL | 1104.86  | 9  | 3.14724   |
| Se020 | WDR59 D531E    | HLA-A*31:01 | MT | YQ[D]ANIPFPR | 229.32 | WT | YQ[D]ANIPFPR | 307.1    | 10 | 7.74439   |
| Se020 | WDR59 D531E    | HLA-C*07:02 | MT | SYQ[E]ANIPF  | 242.64 | WT | SYQ[D]ANIPF  | 198.31   | 9  | 7.74439   |
| Se020 | WDR59 D531E    | HLA-C*03:04 | MT | TAYGSYQ[E]A  | 473.54 | WT | TAYGSYQ[D]A  | 3200.62  | 9  | 7.74439   |
| Se020 | CDH13 K137R    | HLA-B*07:02 | MT | VPRQ[R]RSIVV | 10.26  | WT | VPRQ[K]RSIVV | 11.73    | 10 | 14.24994  |
| Se020 | CDH13 K137R    | HLA-B*07:02 | MT | VPRQ[R]RSIV  | 11.3   | WT | VPRQ[K]RSIV  | 13.17    | 9  | 14.24994  |
| Se020 | CDH13 K137R    | HLA-B*07:02 | MT | SPVPRQ[R]RSI | 13.99  | WT | SPVPRQ[K]RSI | 38.36    | 10 | 14.24994  |
| Se020 | CDH13 K137R    | HLA-A*31:01 | MT | RTSPVPRQ[R]R | 33.72  | WT | RTSPVPRQ[K]R | 42.31    | 10 | 14.24994  |
| Se020 | CDH13 K137R    | HLA-A*31:01 | MT | RTSPVPRQ[R]  | 43.79  | WT | RTSPVPRQ[K]  | 428.31   | 9  | 14.24994  |
| Se020 | TP53 P146S     | HLA-A*31:01 | MT | RVCAC[S]GRDR | 106.39 | WT | RVCAC[P]GRDR | 96.27    | 10 | 7.8114    |
| Se020 | MYO18A T436M   | HLA-C*03:04 | MT | H[M]YAGPSLL  | 37.66  | WT | H[T]YAGPSLL  | 24.93    | 9  | 8.36719   |
| Se020 | MYO18A T436M   | HLA-C*07:02 | MT | [M]YAGPSLLVL | 110.83 | WT | [T]YAGPSLLVL | 185.08   | 10 | 8.36719   |
| Se020 | MYO18A T436M   | HLA-C*07:02 | MT | QRYGASLLH[M] | 183.53 | WT | QRYGASLLH[T] | 8987.35  | 10 | 8.36719   |
| Se020 | MYO18A T436M   | HLA-C*07:02 | MT | [M]YAGPSLLV  | 211.56 | WT | [T]YAGPSLLV  | 313.47   | 9  | 8.36719   |
| Se020 | MYO18A T436M   | HLA-C*03:04 | MT | LLH[M]YAGPSL | 309.03 | WT | LLH[T]YAGPSL | 379.51   | 10 | 8.36719   |
| Se020 | MYO18A T436M   | HLA-C*03:04 | MT | H[M]YAGPSLLV | 328.08 | WT | H[T]YAGPSLLV | 179.84   | 10 | 8.36719   |
| Se020 | MYO18A T436M   | HLA-C*03:04 | MT | LH[M]YAGPSL  | 386.2  | WT | LH[T]YAGPSL  | 2585.32  | 9  | 8.36719   |
| Se020 | MYO18A T436M   | HLA-C*03:04 | MT | [M]YAGPSLLVL | 406.36 | WT | [T]YAGPSLLVL | 1883.9   | 10 | 8.36719   |
| Se020 | BPTF D746H     | HLA-A*31:01 | MT | HQHREDH[H]KR | 189.24 | WT | HQHREDH[D]KR | 1387.74  | 10 | 3.56999   |
| Se020 | GLTSCR2 A472V  | HLA-A*31:01 | MT | KLVEKR[V]FR  | 9.81   | WT | KLVEKR[A]FR  | 10.33    | 9  | 113.61218 |
| Se020 | GLTSCR2 A472V  | HLA-B*40:02 | MT | VEKR[V]FREI  | 271.06 | WT | VEKR[A]FREI  | 286.43   | 9  | 113.61218 |
| Se020 | NAT14 L64V     | HLA-C*03:04 | MT | FA[V]ALLLPV  | 6.2    | WT | FA[L]ALLLPV  | 12.11    | 9  | 7.84145   |
| Se020 | NAT14 L64V     | HLA-C*03:04 | MT | FA[V]ALLLPVF | 10.59  | WT | FA[L]ALLLPVF | 17.42    | 10 | 7.84145   |
| Se020 | NAT14 L64V     | HLA-C*03:04 | MT | FVLASFA[V]AL | 11.28  | WT | FVLASFA[L]AL | 11.74    | 10 | 7.84145   |

|       |                |             |    |               |        |    |               |          |    |          |
|-------|----------------|-------------|----|---------------|--------|----|---------------|----------|----|----------|
| Se020 | NAT14 L64V     | HLA-C*03:04 | MT | LASFA[V]ALL   | 26.3   | WT | LASFA[L]ALL   | 59.84    | 9  | 7.84145  |
| Se020 | NAT14 L64V     | HLA-C*03:04 | MT | LASFA[V]ALLL  | 29.49  | WT | LASFA[L]ALLL  | 45.34    | 10 | 7.84145  |
| Se020 | NAT14 L64V     | HLA-C*03:04 | MT | FVLASFA[V]A   | 289.43 | WT | FVLASFA[L]A   | 1618.17  | 9  | 7.84145  |
| Se020 | NAT14 L64V     | HLA-C*03:04 | MT | VLASFA[V]AL   | 328.63 | WT | VLASFA[L]AL   | 172.68   | 9  | 7.84145  |
| Se020 | NAT14 L64V     | HLA-C*03:04 | MT | ASFA[V]ALLL   | 399    | WT | ASFA[L]ALLL   | 495.87   | 9  | 7.84145  |
| Se020 | SOGA1 E455V    | HLA-B*40:02 | MT | [V]EANLLSRRRI | 214.31 | WT | [E]EANLLSRRRI | 1263.19  | 10 | 2.3137   |
| Se020 | ZFP64 C335Y    | HLA-A*31:01 | MT | EF[Y]DKCFSR   | 51.21  | WT | EF[C]DKCFSR   | 341.21   | 9  | 1.54275  |
| Se020 | TRPM2 K1107M   | HLA-B*07:02 | MT | TPAKRH[M]QL   | 10.79  | WT | TPAKRH[K]QL   | 23.5     | 9  | 1.93213  |
| Se020 | TOP3B L5V      | HLA-A*31:01 | MT | KTV[V]MVAEK   | 253.32 | WT | KTV[L]MVAEK   | 277.16   | 9  | 2.80544  |
| Se020 | TOP3B L5V      | HLA-C*03:04 | MT | V[V]MVAEKPSL  | 299.68 | WT | V[L]MVAEKPSL  | 957.94   | 10 | 2.80544  |
| Se020 | PGK1 G54R      | HLA-A*31:01 | MT | SIKFLDN[R]    | 19.73  | WT | SIKFLDN[G]    | 19870.08 | 9  | 87.48911 |
| Se020 | PGK1 G54R      | HLA-C*07:02 | MT | N[R]AKSVVLM   | 228.61 | WT | N[G]AKSVVLM   | 12025.07 | 9  | 87.48911 |
| Se020 | G6PD V382L     | HLA-A*31:01 | MT | RWDG[L]PFILR  | 93.29  | WT | RWDG[V]PFILR  | 75.96    | 10 | 8.70792  |
| Se020 | G6PD V382L     | HLA-B*40:02 | MT | NERWDG[L]PFI  | 141.86 | WT | NERWDG[V]PFI  | 125.7    | 10 | 8.70792  |
| Se020 | G6PD V382L     | HLA-B*40:02 | MT | VENERWDG[L]   | 272.22 | WT | VENERWDG[V]   | 766.35   | 9  | 8.70792  |
| Se020 | G6PD V382L     | HLA-B*40:02 | MT | NERWDG[L]PF   | 287.41 | WT | NERWDG[V]PF   | 273.21   | 9  | 8.70792  |
| Se023 | C1orf174 G109A | HLA-A*02:06 | MT | ALLPGSEA[A]V  | 18.76  | WT | ALLPGSEA[G]V  | 16.4     | 10 | 20.68506 |
| Se023 | C1orf174 G109A | HLA-A*02:06 | MT | ALLPGSEA[A]   | 126.21 | WT | ALLPGSEA[G]   | 5058.2   | 9  | 20.68506 |
| Se023 | C1orf174 G109A | HLA-A*02:06 | MT | LLPGSEA[A]V   | 142.79 | WT | LLPGSEA[G]V   | 116.45   | 9  | 20.68506 |
| Se023 | TRAF5 C81F     | HLA-B*40:02 | MT | RELNTVPI[F]   | 26.58  | WT | RELNTVPI[C]   | 82.99    | 9  | 5.17675  |
| Se023 | TRAF5 C81F     | HLA-A*02:06 | MT | ELNTVPI[F]PV  | 119.13 | WT | ELNTVPI[C]PV  | 553.6    | 10 | 5.17675  |
| Se023 | BIRC6 V3552A   | HLA-C*03:03 | MT | H[A]HPNYFSL   | 8.68   | WT | H[V]HPNYFSL   | 54.57    | 9  | 4.46879  |
| Se023 | BIRC6 V3552A   | HLA-C*03:03 | MT | H[A]HPNYFSL   | 16.56  | WT | H[V]HPNYFSL   | 129.8    | 10 | 4.46879  |
| Se023 | BIRC6 V3552A   | HLA-A*02:06 | MT | SLLCSMCH[A]   | 60.54  | WT | SLLCSMCH[V]   | 7.89     | 9  | 4.46879  |
| Se023 | ING5 E108V     | HLA-A*02:06 | MT | RLDADLARF[V]  | 68.16  | WT | RLDADLARF[E]  | 16639.98 | 10 | 3.76447  |
| Se023 | TRAK1 R460C    | HLA-B*40:02 | MT | GEL[C]SGSLT   | 233.74 | WT | GEL[R]SGSLT   | 356.54   | 9  | 5.65518  |
| Se023 | RBM5 V145M     | HLA-C*03:03 | MT | FAF[M]EFYHL   | 18.01  | WT | FAF[V]EFYHL   | 24.04    | 9  | 42.04707 |
| Se023 | RBM5 V145M     | HLA-A*02:06 | MT | FAF[M]EFYHL   | 18.17  | WT | FAF[V]EFYHL   | 29.89    | 9  | 42.04707 |
| Se023 | RBM5 V145M     | HLA-B*40:02 | MT | [M]EFYHLQDAT  | 74.53  | WT | [V]EFYHLQDAT  | 165.24   | 10 | 42.04707 |
| Se023 | RBM5 V145M     | HLA-B*40:02 | MT | [M]EFYHLQDA   | 111.15 | WT | [V]EFYHLQDA   | 219.01   | 9  | 42.04707 |
| Se023 | RBM5 V145M     | HLA-A*02:06 | MT | GVSRRGFAF[M]  | 485.02 | WT | GVSRRGFAF[V]  | 18.38    | 9  | 42.04707 |
| Se023 | RBM5 V145M     | HLA-A*24:02 | MT | GFAF[M]EFYHL  | 499.73 | WT | GFAF[V]EFYHL  | 485.77   | 10 | 42.04707 |
| Se023 | DZIP3 I336M    | HLA-A*02:06 | MT | GIVK[M]LFEV   | 8.48   | WT | GIVK[I]LFEV   | 7.04     | 9  | 1.6226   |
| Se023 | DZIP3 I336M    | HLA-A*02:06 | MT | GIVK[M]LFEVV  | 84.29  | WT | GIVK[I]LFEVV  | 75.64    | 10 | 1.6226   |
| Se023 | BRAT1 L659V    | HLA-C*03:03 | MT | LA[V]VFLGQTL  | 36.4   | WT | LA[L]VFLGQTL  | 67.94    | 10 | 8.51385  |
| Se023 | BRAT1 L659V    | HLA-C*03:03 | MT | A[V]VFLGQTL   | 336.59 | WT | A[L]VFLGQTL   | 1231.59  | 9  | 8.51385  |
| Se023 | BRAT1 L659V    | HLA-A*02:06 | MT | AQGLELA[V]V   | 367.97 | WT | AQGLELA[L]V   | 110.47   | 9  | 8.51385  |
| Se023 | URGCP G538V    | HLA-A*02:06 | MT | S[V]VQEFISGI  | 94.72  | WT | S[G]VQEFISGI  | 3890.44  | 10 | 6.08714  |
| Se023 | URGCP G538V    | HLA-A*02:06 | MT | QNGHDPSS[V]   | 190.41 | WT | QNGHDPSS[G]   | 24875.74 | 10 | 6.08714  |
| Se023 | URGCP G538V    | HLA-A*02:06 | MT | [V]VQEFISGI   | 224.29 | WT | [G]VQEFISGI   | 207.02   | 9  | 6.08714  |
| Se023 | SAMD9 C494F    | HLA-A*24:02 | MT | LYHQPSWIF[F]  | 15.86  | WT | LYHQPSWIF[C]  | 3442.2   | 10 | 5.99703  |
| Se023 | SAMD9 C494F    | HLA-A*24:02 | MT | YHQPSWIF[F]   | 118.01 | WT | YHQPSWIF[C]   | 14278.53 | 9  | 5.99703  |
| Se023 | SAMD9 C494F    | HLA-C*03:03 | MT | WIF[F]NGRLDL  | 219.98 | WT | WIF[C]NGRLDL  | 155.35   | 10 | 5.99703  |
| Se023 | ABC8 G495V     | HLA-B*40:02 | MT | HEFITSPFE[V]  | 17.28  | WT | HEFITSPFE[G]  | 349.24   | 10 | 4.80064  |
| Se023 | ABC8 G495V     | HLA-A*02:06 | MT | TSPFE[V]YNTV  | 127.25 | WT | TSPFE[G]YNTV  | 219      | 10 | 4.80064  |
| Se023 | ABC8 G495V     | HLA-B*55:02 | MT | FPE[V]YNTVV   | 182.33 | WT | FPE[G]YNTVV   | 266.41   | 9  | 4.80064  |
| Se023 | ABC8 G495V     | HLA-A*24:02 | MT | SFPE[V]YNTV   | 301.81 | WT | SFPE[G]YNTV   | 549      | 9  | 4.80064  |
| Se023 | ANGPT2 M87R    | HLA-B*40:02 | MT | [R]JENNTQWLM  | 35.78  | WT | [M]JENNTQWLM  | 77.49    | 9  | 3.70264  |
| Se023 | RAB11FIP1 V20M | HLA-A*02:06 | MT | AVWSPTH[V]QV  | 28.32  | WT | AVWSPTH[V]QV  | 38.5     | 10 | 4.28054  |
| Se023 | RAB11FIP1 V20M | HLA-C*03:03 | MT | GAVWSPTH[M]   | 151.4  | WT | GAVWSPTH[V]   | 1009.21  | 9  | 4.28054  |
| Se023 | PLEKHA2 Y229F  | HLA-C*03:03 | MT | FALDDFTIC[F]  | 17.34  | WT | FALDDFTIC[Y]  | 135.39   | 10 | 8.96669  |
| Se023 | PLEKHA2 Y229F  | HLA-A*02:06 | MT | ALDDFTIC[F]F  | 330.43 | WT | ALDDFTIC[Y]F  | 276.73   | 10 | 8.96669  |
| Se023 | SEMA4D E243V   | HLA-B*40:02 | MT | VEY[V]FVFRVL  | 19.24  | WT | VEY[E]FVFRVL  | 15.11    | 10 | 5.49632  |
| Se023 | SEMA4D E243V   | HLA-A*02:06 | MT | Y[V]FVFRVLI   | 78.82  | WT | Y[E]FVFRVLI   | 1197.09  | 9  | 5.49632  |
| Se023 | SEMA4D E243V   | HLA-A*02:06 | MT | FFTEVSVEY[V]  | 104.69 | WT | FFTEVSVEY[E]  | 21928.69 | 10 | 5.49632  |
| Se023 | SEMA4D E243V   | HLA-B*40:02 | MT | VEY[V]FVFRV   | 108.46 | WT | VEY[E]FVFRV   | 105.38   | 9  | 5.49632  |
| Se023 | SEMA4D E243V   | HLA-A*02:06 | MT | FTEVSVEY[V]   | 126.2  | WT | FTEVSVEY[E]   | 24334.67 | 9  | 5.49632  |
| Se023 | SEMA4D E243V   | HLA-A*02:06 | MT | SVEY[V]FVFRV  | 136.08 | WT | SVEY[E]FVFRV  | 146.14   | 10 | 5.49632  |
| Se023 | SEMA4D E243V   | HLA-A*24:02 | MT | EY[V]FVFRVLI  | 184.03 | WT | EY[E]FVFRVLI  | 286.29   | 10 | 5.49632  |
| Se023 | SEMA4D E243V   | HLA-B*40:02 | MT | TEVSVEY[V]FV  | 201.17 | WT | TEVSVEY[E]FV  | 480.8    | 10 | 5.49632  |
| Se023 | SEMA4D E243V   | HLA-B*40:02 | MT | TEVSVEY[V]F   | 222.68 | WT | TEVSVEY[E]F   | 334.86   | 9  | 5.49632  |
| Se023 | FBXW5 V234M    | HLA-A*02:06 | MT | N[M]VKRFLFKI  | 135.68 | WT | N[V]VKRFLFKI  | 327.53   | 9  | 49.74458 |
| Se023 | FBXW5 V234M    | HLA-B*40:02 | MT | SENVN[M]VKRRL | 209.17 | WT | SENVN[V]VKRRL | 168.53   | 10 | 49.74458 |
| Se023 | FBXW5 V234M    | HLA-B*40:02 | MT | VESENVN[M]V   | 270.23 | WT | VESENVN[V]V   | 176.52   | 9  | 49.74458 |
| Se023 | PFKP G118S     | HLA-C*03:03 | MT | R[S]JITNLCVI  | 191.88 | WT | R[G]JITNLCVI  | 1214.36  | 9  | 21.90231 |
| Se023 | PFKP G118S     | HLA-A*02:06 | MT | NLLQR[S]JITNL | 359.74 | WT | NLLQR[G]JITNL | 430.3    | 10 | 21.90231 |
| Se023 | PFKP G118S     | HLA-A*02:06 | MT | LLQR[S]JITNL  | 407.09 | WT | LLQR[G]JITNL  | 244.63   | 9  | 21.90231 |
| Se023 | PAMR1 K148M    | HLA-A*02:06 | MT | Y[M]JACLAGY   | 210.46 | WT | Y[K]JACLAGY   | 19396.6  | 10 | 1.06971  |
| Se023 | PAMR1 K148M    | HLA-A*24:02 | MT | SY[M]JACLAGY  | 357.97 | WT | SY[K]JACLAGY  | 2061.2   | 10 | 1.06971  |
| Se023 | KMT2D P3838L   | HLA-C*03:03 | MT | MTQSRVLSS[L]  | 85.17  | WT | MTQSRVLSS[P]  | 24621.45 | 10 | 3.61105  |
| Se023 | KMT2D P3838L   | HLA-A*02:06 | MT | RVLSS[L]QLA   | 105.6  | WT | RVLSS[P]QLA   | 1030.29  | 9  | 3.61105  |
| Se023 | KMT2D P3838L   | HLA-A*02:06 | MT | TQSRVLSS[L]   | 195.73 | WT | TQSRVLSS[P]   | 12864.7  | 9  | 3.61105  |
| Se023 | KMT2D P3838L   | HLA-A*02:06 | MT | MTQSRVLSS[L]  | 460.88 | WT | MTQSRVLSS[P]  | 18372.7  | 10 | 3.61105  |
| Se023 | KMT2D P3838L   | HLA-A*02:06 | MT | [L]QLAQGGQGL  | 466.89 | WT | [P]QLAQGGQGL  | 13126.13 | 10 | 3.61105  |
| Se023 | FLT1 A935E     | HLA-A*02:06 | MT | FLNKDA[E]LHM  | 152.13 | WT | FLNKDA[A]LHM  | 107.74   | 10 | 2.45095  |
| Se023 | FLT1 A935E     | HLA-C*03:03 | MT | FLNKDA[E]LHM  | 297.1  | WT | FLNKDA[A]LHM  | 85.21    | 10 | 2.45095  |
| Se023 | MTRF1 N107S    | HLA-C*03:03 | MT | RSL[S]JRRHAEL | 360.39 | WT | RSL[N]JRRHAEL | 459.11   | 10 | 5.22061  |
| Se023 | RNF219 I124V   | HLA-A*02:06 | MT | SQ[V]KTILDPL  | 38.21  | WT | SQ[I]KTILDPL  | 16.7     | 10 | 14.28669 |

|       |                |             |    |               |        |    |               |         |    |           |
|-------|----------------|-------------|----|---------------|--------|----|---------------|---------|----|-----------|
| Se023 | RNF219 I124V   | HLA-B*40:02 | MT | LESQ[V]KTLI   | 73.22  | WT | LESQ[I]KTLI   | 61.67   | 9  | 14.28669  |
| Se023 | RNF219 I124V   | HLA-B*40:02 | MT | SQ[V]KTLIDPL  | 205.92 | WT | SQ[I]KTLIDPL  | 99.65   | 10 | 14.28669  |
| Se023 | PAPLN D959E    | HLA-B*40:02 | MT | R[E]SQKQLRI   | 80.26  | WT | R[D]SQKQLRI   | 2500.83 | 10 | 2.60408   |
| Se023 | STON2 H395Y    | HLA-A*02:06 | MT | LQIDDPD[Y]F   | 431.35 | WT | LQIDDPD[H]F   | 1639.73 | 9  | 9.42144   |
| Se023 | ADAL N287D     | HLA-A*02:06 | MT | YQLAAETF[D]L  | 12.18  | WT | YQLAAETF[N]L  | 5.22    | 10 | 1.50474   |
| Se023 | ADAL N287D     | HLA-A*02:06 | MT | QLAAETF[D]L   | 185.2  | WT | QLAAETF[N]L   | 29.06   | 9  | 1.50474   |
| Se023 | ADAL N287D     | HLA-B*40:02 | MT | YQLAAETF[D]L  | 221.53 | WT | YQLAAETF[N]L  | 108.84  | 10 | 1.50474   |
| Se023 | MYO1E V710M    | HLA-A*02:06 | MT | F[M]ARKKYVQM  | 219.02 | WT | F[V]ARKKYVQM  | 1007.2  | 10 | 9.52341   |
| Se023 | MYO1E V710M    | HLA-C*03:03 | MT | F[M]ARKKYVQM  | 319.18 | WT | F[V]ARKKYVQM  | 199.63  | 10 | 9.52341   |
| Se023 | MYO1E V710M    | HLA-C*03:03 | MT | [M]ARKKYVQM   | 437.79 | WT | [V]ARKKYVQM   | 1902.76 | 9  | 9.52341   |
| Se023 | THSD4 G323R    | HLA-B*40:02 | MT | [R]EWSECSKTC  | 150.47 | WT | [G]EWSECSKTC  | 402.92  | 10 | 41.35849  |
| Se023 | THSD4 G323R    | HLA-B*40:02 | MT | [R]EWSECSKT   | 192.81 | WT | [G]EWSECSKT   | 517.5   | 9  | 41.35849  |
| Se023 | SLC7A6OS N127S | HLA-B*40:02 | MT | SEYTPG[S]PEA  | 81.66  | WT | SEYTPG[N]PEA  | 88.89   | 10 | 4.21922   |
| Se023 | ATP6V0A1 E166D | HLA-B*40:02 | MT | S[D]MGRGTPL   | 359.72 | WT | S[E]MGRGTPL   | 10.51   | 9  | 4.19181   |
| Se023 | FASN G1002S    | HLA-B*40:02 | MT | YDY[S]PHFQGI  | 140.96 | WT | YDY[G]PHFQGI  | 182.89  | 10 | 14.1349   |
| Se023 | FASN G1002S    | HLA-C*03:03 | MT | Y[S]PHFQGI    | 312.31 | WT | Y[G]PHFQGI    | 1170.36 | 9  | 14.1349   |
| Se023 | FASN G1002S    | HLA-B*55:02 | MT | [S]PHFQGILEA  | 461.45 | WT | [G]PHFQGILEA  | 991.38  | 10 | 14.1349   |
| Se023 | RNMT N320Y     | HLA-A*24:02 | MT | YFIGTTP[Y]SF  | 9.31   | WT | YFIGTTP[N]SF  | 22.77   | 10 | 5.21033   |
| Se023 | RNMT N320Y     | HLA-C*03:03 | MT | [Y]SFELIRRL   | 38.49  | WT | [N]SFELIRRL   | 1856.83 | 9  | 5.21033   |
| Se023 | RNMT N320Y     | HLA-A*02:06 | MT | GTTT[Y]SFEL   | 84.37  | WT | GTTT[N]SFEL   | 363.4   | 9  | 5.21033   |
| Se023 | RNMT N320Y     | HLA-A*02:06 | MT | [Y]SFELIRRL   | 199    | WT | [N]SFELIRRL   | 3672.03 | 9  | 5.21033   |
| Se023 | RNMT N320Y     | HLA-A*02:06 | MT | TTP[Y]SFELI   | 276.39 | WT | TTP[N]SFELI   | 348.07  | 9  | 5.21033   |
| Se023 | RNMT N320Y     | HLA-A*02:06 | MT | GTTT[Y]SFELI  | 476.75 | WT | GTTT[N]SFELI  | 848.6   | 10 | 5.21033   |
| Se023 | MUC16 T3046A   | HLA-B*40:02 | MT | KETSFLSP[A]   | 30.74  | WT | KETSFLSP[T]   | 62.08   | 9  | 11.14232  |
| Se023 | MUC16 T3046A   | HLA-B*40:02 | MT | KETSFLSP[A]A  | 36.49  | WT | KETSFLSP[T]A  | 42.29   | 10 | 11.14232  |
| Se023 | MUC16 T3046A   | HLA-C*03:03 | MT | [A]ASTSRKTSLS | 319.97 | WT | [T]ASTSRKTSLS | 341.89  | 10 | 11.14232  |
| Se023 | COLGALT1 H256Y | HLA-A*24:02 | MT | FYPPI[Y]PDYTW | 15.02  | WT | FYPPI[H]PDYTW | 21.87   | 10 | 31.59263  |
| Se023 | COLGALT1 H256Y | HLA-A*24:02 | MT | P[Y]PDYTWSF   | 29.15  | WT | P[H]PDYTWSF   | 2945.57 | 9  | 31.59263  |
| Se023 | LPAR2 R303C    | HLA-B*40:02 | MT | AEM[C]RTFRRL  | 25.46  | WT | AEM[R]RTFRRL  | 37.37   | 10 | 6.88294   |
| Se023 | LPAR2 R303C    | HLA-B*40:02 | MT | RDAEM[C]RTF   | 491.72 | WT | RDAEM[R]RTF   | 923.55  | 9  | 6.88294   |
| Se023 | RBM42 A177G    | HLA-C*03:03 | MT | SSA[G]AGPRPM  | 69.54  | WT | SSA[A]AGPRPM  | 69.32   | 10 | 34.49046  |
| Se023 | RBM42 A177G    | HLA-C*03:03 | MT | SA[G]AGPRPM   | 77.33  | WT | SA[A]AGPRPM   | 9.81    | 9  | 34.49046  |
| Se023 | RBM42 A177G    | HLA-C*03:03 | MT | [G]AGPRPMAL   | 356.73 | WT | [A]AGPRPMAL   | 101.56  | 9  | 34.49046  |
| Se023 | MYBPC2 G813V   | HLA-A*02:06 | MT | RILFRVV[V]V   | 121.19 | WT | RILFRVV[G]V   | 36.33   | 9  | 1.19099   |
| Se023 | MYBPC2 G813V   | HLA-A*02:06 | MT | ILFRVV[V]VNI  | 190.55 | WT | ILFRVV[G]VNI  | 621.97  | 10 | 1.19099   |
| Se023 | SLC52A3 A158V  | HLA-A*02:06 | MT | GLLPALVAL[V]  | 8.87   | WT | GLLPALVAL[A]  | 41.11   | 10 | 5.19805   |
| Se023 | SLC52A3 A158V  | HLA-A*02:06 | MT | LLPALVAL[V]   | 14.7   | WT | LLPALVAL[A]   | 107.22  | 9  | 5.19805   |
| Se023 | SLC52A3 A158V  | HLA-C*03:03 | MT | VAL[V]QGSGL   | 167.87 | WT | VAL[A]QGSGL   | 103.33  | 9  | 5.19805   |
| Se023 | SLC52A3 A158V  | HLA-A*02:06 | MT | [V]QGSGLTTCV  | 174.19 | WT | [A]QGSGLTTCV  | 104.25  | 10 | 5.19805   |
| Se024 | CPT2 R634Q     | HLA-A*24:02 | MT | SYPRNA[Q]JEF  | 37.26  | WT | SYPRNA[R]JEF  | 111.58  | 10 | 6.27441   |
| Se024 | KDM5B N460D    | HLA-A*02:06 | MT | SGW[D]LNNMPV  | 172.89 | WT | SGW[N]LNNMPV  | 292.55  | 10 | 12.69383  |
| Se024 | HPCAL1 E66K    | HLA-A*24:02 | MT | KFA[K]HVFRTF  | 17.78  | WT | KFA[E]HVFRTF  | 16.91   | 10 | 10.11966  |
| Se024 | HPCAL1 E66K    | HLA-C*12:02 | MT | FA[K]HVFRTF   | 24.57  | WT | FA[E]HVFRTF   | 32.33   | 9  | 10.11966  |
| Se024 | GLI2 R1372Q    | HLA-A*02:06 | MT | GLVQP[Q]PPL   | 394.9  | WT | GLVQP[R]PPL   | 827.06  | 9  | 1.041     |
| Se024 | GLI2 R1372Q    | HLA-A*02:06 | MT | GLVQP[Q]PPL   | 394.9  | WT | GLVQP[R]PPL   | 827.06  | 9  | 1.84676   |
| Se024 | FAP G443S      | HLA-A*02:06 | MT | ALVCY[S]PGI   | 25.77  | WT | ALVCY[G]PGI   | 90.54   | 9  | 3.03033   |
| Se024 | FAP G443S      | HLA-C*12:02 | MT | Y[S]PGIPISTL  | 30.83  | WT | Y[G]PGIPISTL  | 193.21  | 10 | 3.03033   |
| Se024 | FAP G443S      | HLA-A*02:06 | MT | YALVCY[S]PGI  | 80.55  | WT | YALVCY[G]PGI  | 167.03  | 10 | 3.03033   |
| Se024 | FAP G443S      | HLA-A*02:06 | MT | Y[S]PGIPISTL  | 210.11 | WT | Y[G]PGIPISTL  | 1327.85 | 10 | 3.03033   |
| Se024 | FAP G443S      | HLA-C*08:01 | MT | Y[S]PGIPISTL  | 308.04 | WT | Y[G]PGIPISTL  | 1142.02 | 10 | 3.03033   |
| Se024 | FAP G443S      | HLA-C*12:02 | MT | YALVCY[S]PGI  | 413    | WT | YALVCY[G]PGI  | 625.44  | 10 | 3.03033   |
| Se024 | FN1 P1461S     | HLA-C*12:02 | MT | VAAT[S]TSL    | 85     | WT | VAAT[P]TSL    | 47.85   | 9  | 104.28207 |
| Se024 | FN1 P1461S     | HLA-C*12:02 | MT | VAAT[S]TSLLI  | 210.67 | WT | VAAT[P]TSLLI  | 142.13  | 10 | 104.28207 |
| Se024 | FN1 P1461S     | HLA-C*12:02 | MT | VVAAT[S]TSL   | 246.97 | WT | VVAAT[P]TSL   | 198.34  | 10 | 104.28207 |
| Se024 | FN1 P1461S     | HLA-C*12:02 | MT | VVAAT[S]TSL   | 288.02 | WT | VVAAT[P]TSL   | 261.79  | 9  | 104.28207 |
| Se024 | HIST1H4E D86H  | HLA-C*12:02 | MT | TAM[H]VVYAL   | 41.69  | WT | TAM[D]VVYAL   | 16.3    | 9  | 1.8759    |
| Se024 | HIST1H4E D86H  | HLA-A*02:06 | MT | KTVTAM[H]VV   | 43.11  | WT | KTVTAM[D]VV   | 127.15  | 9  | 1.8759    |
| Se024 | HIST1H4E D86H  | HLA-A*02:06 | MT | TAM[H]VVYAL   | 54.61  | WT | TAM[D]VVYAL   | 22.18   | 9  | 1.8759    |
| Se024 | HIST1H4E D86H  | HLA-A*02:06 | MT | VTAM[H]VVYA   | 105.24 | WT | VTAM[D]VVYA   | 291.48  | 9  | 1.8759    |
| Se024 | HIST1H4E D86H  | HLA-A*02:06 | MT | VTAM[H]VVYAL  | 150.9  | WT | VTAM[D]VVYAL  | 204.42  | 10 | 1.8759    |
| Se024 | HIST1H4E D86H  | HLA-C*08:01 | MT | TAM[H]VVYAL   | 193.72 | WT | TAM[D]VVYAL   | 90.01   | 9  | 1.8759    |
| Se024 | HIST1H4E D86H  | HLA-C*12:02 | MT | KTVTAM[H]VV   | 234.48 | WT | KTVTAM[D]VV   | 557.49  | 9  | 1.8759    |
| Se024 | HIST1H4E D86H  | HLA-C*12:02 | MT | VTAM[H]VVYAL  | 237.2  | WT | VTAM[D]VVYAL  | 427.1   | 10 | 1.8759    |
| Se024 | HIST1H4E D86H  | HLA-C*12:02 | MT | KTVTAM[H]VVY  | 332.05 | WT | KTVTAM[D]VVY  | 519.27  | 10 | 1.8759    |
| Se024 | HIST1H4E D86H  | HLA-A*02:06 | MT | TVTAM[H]VVYA  | 467.58 | WT | TVTAM[D]VVYA  | 1064.75 | 10 | 1.8759    |
| Se024 | TRRAP R90W     | HLA-A*02:06 | MT | QL[W]KLVLEI   | 23.81  | WT | QL[R]KLVLEI   | 74.39   | 10 | 4.50529   |
| Se024 | TRRAP R90W     | HLA-A*02:06 | MT | QL[W]KLVLEI   | 134.71 | WT | QL[R]KLVLEI   | 3652.81 | 9  | 4.50529   |
| Se024 | ABC9 R637W     | HLA-A*02:06 | MT | IIAH[W]LSTV   | 8.44   | WT | IIAH[R]LSTV   | 42.9    | 9  | 1.36777   |
| Se024 | ABC9 R637W     | HLA-A*02:06 | MT | IIAH[W]LSTV   | 10.15  | WT | IIAH[R]LSTV   | 40.71   | 10 | 1.36777   |
| Se024 | ABC9 R637W     | HLA-C*12:02 | MT | IIAH[W]LSTV   | 163.48 | WT | IIAH[R]LSTV   | 164.96  | 9  | 1.36777   |
| Se024 | ABC9 R637W     | HLA-A*02:06 | MT | HTVLIIAH[W]L  | 177.05 | WT | HTVLIIAH[R]L  | 374     | 10 | 1.36777   |
| Se024 | ABC9 R637W     | HLA-C*12:02 | MT | IIAH[W]LSTV   | 217.49 | WT | IIAH[R]LSTV   | 212.55  | 10 | 1.36777   |
| Se024 | ABC9 R637W     | HLA-A*02:06 | MT | [W]LSTVEHAHL  | 339.27 | WT | [R]LSTVEHAHL  | 1061.19 | 10 | 1.36777   |
| Se024 | ABC9 R637W     | HLA-A*02:06 | MT | TVLIIAH[W]L   | 350.48 | WT | TVLIIAH[R]L   | 534.35  | 9  | 1.36777   |
| Se024 | ABC9 R637W     | HLA-A*02:06 | MT | IIAH[W]LST    | 416.07 | WT | IIAH[R]LST    | 2656.32 | 9  | 1.36777   |
| Se024 | ALOX5AP A74E   | HLA-A*02:06 | MT | FLAVLWS[E]GL  | 23.91  | WT | FLAVLWS[A]GL  | 21.06   | 10 | 4.15834   |
| Se024 | MTHFS I122F    | HLA-A*02:06 | MT | EQ[F]CLQVPV   | 16.73  | WT | EQ[I]CLQVPV   | 25.94   | 9  | 14.83298  |
| Se024 | MTHFS I122F    | HLA-A*02:06 | MT | ALAFKEQ[F]CL  | 488.61 | WT | ALAFKEQ[I]CL  | 1481.26 | 10 | 14.83298  |

|       |                |             |    |                |        |    |                |          |    |          |
|-------|----------------|-------------|----|----------------|--------|----|----------------|----------|----|----------|
| Se024 | CDH3 N706S     | HLA-A*02:06 | MT | FIIE[S]LKAA    | 13.22  | WT | FIIE[N]LKAA    | 16.92    | 9  | 20.23897 |
| Se024 | TP53 Y88D      | HLA-A*02:06 | MT | VVP[D]EPPEV    | 58.81  | WT | VVP[Y]EPPEV    | 193.11   | 9  | 34.48702 |
| Se024 | TP53 Y88D      | HLA-A*02:06 | MT | VVV[PD]EPPEV   | 65.26  | WT | VVV[Y]EPPEV    | 34.53    | 10 | 34.48702 |
| Se024 | EMILIN2 V906M  | HLA-A*02:06 | MT | SL[M]SFSAGL    | 15.89  | WT | SL[V]SFSAGL    | 72.98    | 9  | 8.64208  |
| Se024 | EMILIN2 V906M  | HLA-B*54:01 | MT | VPSL[M]SFSFA   | 45.86  | WT | VPSL[V]SFSFA   | 38.94    | 9  | 8.64208  |
| Se024 | EMILIN2 V906M  | HLA-A*02:06 | MT | SL[M]SFSAGLT   | 407.6  | WT | SL[V]SFSAGLT   | 1830.45  | 10 | 8.64208  |
| Se024 | EMILIN2 V906M  | HLA-C*12:02 | MT | SL[M]SFSAGL    | 455.21 | WT | SL[V]SFSAGL    | 1358.76  | 9  | 8.64208  |
| Se024 | ZNF160 M54V    | HLA-A*02:06 | MT | VSLGLCHF[D][V] | 281.58 | WT | VSLGLCHF[D][M] | 2090.28  | 10 | 7.71673  |
| Se024 | ZNF160 M54V    | HLA-A*02:06 | MT | SLGLCHF[D][V]  | 491.43 | WT | SLGLCHF[D][M]  | 2284     | 9  | 7.71673  |
| Se025 | MUTYH R112W    | HLA-C*03:04 | MT | [W]AYAVVWSEV   | 20.58  | WT | [R]AYAVVWSEV   | 39.47    | 10 | 13.88373 |
| Se025 | MUTYH R112W    | HLA-C*12:02 | MT | [W]AYAVVWSEV   | 27.79  | WT | [R]AYAVVWSEV   | 41.27    | 10 | 13.88373 |
| Se025 | PIP5K1A D147N  | HLA-C*03:04 | MT | FGIRP[N]DYL    | 355.34 | WT | FGIRP[D]DYL    | 637.79   | 9  | 22.5364  |
| Se025 | CEP350 Q1451E  | HLA-B*40:01 | MT | R[E]ICEMAEL    | 5.98   | WT | R[Q]ICEMAEL    | 356.18   | 9  | 1.2314   |
| Se025 | HS3ST1 R152H   | HLA-C*03:04 | MT | [H]VLSDYTQVF   | 415.82 | WT | [R]VLSDYTQVF   | 586.4    | 10 | 5.75224  |
| Se025 | GFPT2 V642L    | HLA-C*03:04 | MT | KTIELPHT[L]    | 61.34  | WT | KTIELPHT[V]    | 708.21   | 9  | 2.3415   |
| Se025 | GFPT2 V642L    | HLA-C*12:02 | MT | KTIELPHT[L]    | 91.23  | WT | KTIELPHT[V]    | 80.91    | 9  | 2.3415   |
| Se025 | GFPT2 V642L    | HLA-B*40:01 | MT | IELPHT[L]DCL   | 102.07 | WT | IELPHT[V]DCL   | 82.27    | 10 | 2.3415   |
| Se025 | TECPR1 T842M   | HLA-C*03:04 | MT | TGYTSRGLP[M]   | 276.79 | WT | TGYTSRGLP[T]   | 13871.52 | 10 | 1.88536  |
| Se025 | TECPR1 T842M   | HLA-C*12:02 | MT | TGYTSRGLP[M]   | 480.72 | WT | TGYTSRGLP[T]   | 12349.01 | 10 | 1.88536  |
| Se025 | TACCP1 V196M   | HLA-B*40:01 | MT | SESDKTA[M]L    | 105.93 | WT | SESDKTA[V]L    | 39.64    | 9  | 2.15552  |
| Se025 | KNTC1 I1217V   | HLA-B*40:01 | MT | YEL[V]SSLVPL   | 6.45   | WT | YEL[I]SSLVPL   | 6.55     | 10 | 3.31206  |
| Se025 | KNTC1 I1217V   | HLA-C*03:04 | MT | VIYEL[V]SSL    | 107.25 | WT | VIYEL[I]SSL    | 174.65   | 9  | 3.31206  |
| Se025 | KNTC1 I1217V   | HLA-C*12:02 | MT | VIYEL[V]SSL    | 262.26 | WT | VIYEL[I]SSL    | 276.83   | 9  | 3.31206  |
| Se025 | KNTC1 I1217V   | HLA-A*24:02 | MT | IYEL[V]SSLV    | 437.43 | WT | IYEL[I]SSLV    | 357.11   | 9  | 3.31206  |
| Se025 | KNTC1 I1217V   | HLA-C*12:02 | MT | VIYEL[V]SSLV   | 468.31 | WT | VIYEL[I]SSLV   | 532.28   | 10 | 3.31206  |
| Se025 | SPAG9 E189K    | HLA-C*03:04 | MT | QAI[E]STPEL    | 55.17  | WT | QAI[I]STPEL    | 54.84    | 10 | 6.91801  |
| Se025 | SPAG9 E189K    | HLA-C*03:04 | MT | AII[K]STPEL    | 202.4  | WT | AII[E]STPEL    | 62.64    | 9  | 6.91801  |
| Se025 | DIP2A A214T    | HLA-B*40:01 | MT | LE[T]HTHIGV    | 169.39 | WT | LE[A]HTHIGV    | 122.72   | 9  | 5.33112  |
| Se025 | ZBED4 T64M     | HLA-B*40:01 | MT | GERAGLGG[M]    | 421.28 | WT | GERAGLGG[T]    | 9424.58  | 9  | 2.46266  |
| Se026 | ECE1 R171H     | HLA-B*15:01 | MT | AQVYY[H]ACM    | 66.86  | WT | AQVYY[R]ACM    | 113.18   | 9  | 22.12594 |
| Se026 | ECE1 R171H     | HLA-C*03:04 | MT | KAQVYY[H]ACM   | 443.31 | WT | KAQVYY[R]ACM   | 846.03   | 10 | 22.12594 |
| Se026 | LRRN2 S45L     | HLA-C*15:02 | MT | [L]JSYREATTV   | 149.47 | WT | [S]JSYREATTV   | 99.27    | 9  | 17.68531 |
| Se026 | OR2W3 P182H    | HLA-B*40:06 | MT | REM[H]ALIRMA   | 81.3   | WT | REM[P]ALIRMA   | 91.21    | 10 | 1.2688   |
| Se026 | OR2W3 P182H    | HLA-A*24:02 | MT | HFLREM[H]ALI   | 151.05 | WT | HFLREM[P]ALI   | 251.73   | 10 | 1.2688   |
| Se026 | OR2W3 P182H    | HLA-B*40:06 | MT | REM[H]ALIRM    | 186.89 | WT | REM[P]ALIRM    | 254.12   | 9  | 1.2688   |
| Se026 | MTHFD2 V205I   | HLA-C*15:02 | MT | RSKN[I]GMPI    | 210.79 | WT | RSKN[V]GMPI    | 213.53   | 9  | 28.14006 |
| Se026 | MTHFD2 V205I   | HLA-C*03:04 | MT | [I]GMPIAMLL    | 471.99 | WT | [V]GMPIAMLL    | 708      | 9  | 28.14006 |
| Se026 | DOCK10 S1776R  | HLA-A*24:02 | MT | AF[L]R]ITPNI   | 393.36 | WT | AF[L]S]ITPNI   | 270.98   | 9  | 3.51733  |
| Se026 | TRANK1 L436I   | HLA-A*26:02 | MT | TIIPH[I]STW    | 118.24 | WT | TIIPH[L]STW    | 105.13   | 9  | 3.5667   |
| Se026 | ARMC8 D26Y     | HLA-B*15:01 | MT | VTASSRHYV[Y]   | 195.74 | WT | VTASSRHYV[D]   | 28278.51 | 10 | 8.26426  |
| Se026 | ARMC8 D26Y     | HLA-A*26:02 | MT | VTASSRHYV[Y]   | 333.4  | WT | VTASSRHYV[D]   | 31088.34 | 10 | 8.26426  |
| Se026 | ARMC8 D26Y     | HLA-C*15:02 | MT | ASSRHYV[Y]RL   | 386.12 | WT | ASSRHYV[D]RL   | 1833.59  | 10 | 8.26426  |
| Se026 | ARMC8 D26Y     | HLA-B*15:01 | MT | SSRHYV[Y]RFL   | 452.57 | WT | SSRHYV[D]RFL   | 727.4    | 10 | 8.26426  |
| Se026 | ADAP1 P219L    | HLA-C*03:04 | MT | YTVLHGFP[L]    | 6.08   | WT | YTVLHGFP[P]    | 5567.22  | 9  | 4.44598  |
| Se026 | ADAP1 P219L    | HLA-A*26:02 | MT | YTVLHGFP[L]    | 34.52  | WT | YTVLHGFP[P]    | 2602.64  | 9  | 4.44598  |
| Se026 | ADAP1 P219L    | HLA-C*15:02 | MT | YTVLHGFP[L]    | 116.79 | WT | YTVLHGFP[P]    | 11171.36 | 9  | 4.44598  |
| Se026 | TMEM184A I226T | HLA-C*03:04 | MT | L[T]YNASVSL    | 13.25  | WT | L[I]YNASVSL    | 25.27    | 9  | 5.46851  |
| Se026 | TMEM184A I226T | HLA-C*15:02 | MT | L[T]YNASVSL    | 66.93  | WT | L[I]YNASVSL    | 789.51   | 9  | 5.46851  |
| Se026 | TMEM184A I226T | HLA-C*03:04 | MT | YVTL[I]YNASV   | 141.09 | WT | YVTL[I]YNASV   | 278.13   | 10 | 5.46851  |
| Se026 | TMEM184A I226T | HLA-B*15:01 | MT | L[T]YNASVSL    | 212.34 | WT | L[I]YNASVSL    | 108.49   | 9  | 5.46851  |
| Se026 | TMEM184A I226T | HLA-A*24:02 | MT | [T]YNASVSLAL   | 223.7  | WT | [I]YNASVSLAL   | 153.55   | 10 | 5.46851  |
| Se026 | TMEM184A I226T | HLA-A*26:02 | MT | YVTL[T]YNASV   | 253.64 | WT | YVTL[I]YNASV   | 253.27   | 10 | 5.46851  |
| Se026 | TMEM184A I226T | HLA-C*15:02 | MT | VTL[T]YNASV    | 294.33 | WT | VTL[I]YNASV    | 644.05   | 9  | 5.46851  |
| Se026 | TMEM184A I226T | HLA-C*15:02 | MT | L[T]YNASVSLA   | 308.85 | WT | L[I]YNASVSLA   | 3656.1   | 10 | 5.46851  |
| Se026 | TMEM184A I226T | HLA-C*03:04 | MT | TL[T]YNASVSL   | 377.03 | WT | TL[I]YNASVSL   | 117.4    | 10 | 5.46851  |
| Se026 | CHD7 A2127S    | HLA-A*24:02 | MT | SFLD[S]HKNF    | 346.33 | WT | SFLD[A]HKNF    | 289.94   | 9  | 4.45236  |
| Se026 | CHD7 A2127S    | HLA-B*15:01 | MT | LSFLD[S]HKNF   | 383.09 | WT | LSFLD[A]HKNF   | 594.98   | 10 | 4.45236  |
| Se026 | SGK3 L214F     | HLA-B*15:01 | MT | [F]LKNVKHPF    | 31.09  | WT | [L]LKNVKHPF    | 33.25    | 9  | 2.74679  |
| Se026 | SGK3 L214F     | HLA-A*24:02 | MT | V[F]LKNVKHPF   | 58.8   | WT | V[L]LKNVKHPF   | 950.48   | 10 | 2.74679  |
| Se026 | SGK3 L214F     | HLA-B*15:01 | MT | HIMAERNV[F]    | 59.88  | WT | HIMAERNV[L]    | 1636.87  | 9  | 2.74679  |
| Se026 | SGK3 L214F     | HLA-C*03:04 | MT | HIMAERNV[F]L   | 354.34 | WT | HIMAERNV[L]L   | 288.95   | 10 | 2.74679  |
| Se026 | SGK3 L214F     | HLA-A*26:02 | MT | HIMAERNV[F]    | 437.07 | WT | HIMAERNV[L]    | 2367.34  | 9  | 2.74679  |
| Se026 | SGK3 L214F     | HLA-C*03:04 | MT | IMAERNV[F]L    | 487.12 | WT | IMAERNV[L]L    | 370.86   | 9  | 2.74679  |
| Se026 | NCOA2 L694F    | HLA-B*15:01 | MT | RL[F]QDSSSPV   | 221.54 | WT | RL[L]QDSSSPV   | 964.68   | 10 | 3.97959  |
| Se026 | NCOA2 L694F    | HLA-C*03:04 | MT | [F]QDSSSPVDL   | 314.18 | WT | [L]QDSSSPVDL   | 1641.91  | 10 | 3.97959  |
| Se026 | NCOA2 L694F    | HLA-C*03:04 | MT | RL[F]QDSSSPV   | 322.93 | WT | RL[L]QDSSSPV   | 1201.18  | 10 | 3.97959  |
| Se026 | VPS13B I579T   | HLA-A*26:02 | MT | STKSLV[T]GPL   | 141.41 | WT | STKSLV[I]GPL   | 122.22   | 10 | 2.35119  |
| Se026 | VPS13B I579T   | HLA-B*15:01 | MT | SLV[T]GPLDF    | 453.96 | WT | SLV[I]GPLDF    | 711.33   | 9  | 2.35119  |
| Se026 | ZNF462 T1204M  | HLA-A*26:02 | MT | [M]VKGVLIHY    | 18.26  | WT | [T]VKGVLIHY    | 30.7     | 9  | 2.35687  |
| Se026 | ZNF462 T1204M  | HLA-B*15:01 | MT | R[M]VKGVLIHY   | 18.85  | WT | R[T]VKGVLIHY   | 83.95    | 10 | 2.35687  |
| Se026 | ZNF462 T1204M  | HLA-B*15:01 | MT | [M]VKGVLIHY    | 81.25  | WT | [T]VKGVLIHY    | 276.98   | 9  | 2.35687  |
| Se026 | ZNF462 T1204M  | HLA-B*15:01 | MT | R[M]VKGVLIHY   | 431.68 | WT | R[T]VKGVLIHY   | 2875.79  | 9  | 2.35687  |
| Se026 | TRIM32 A513S   | HLA-B*15:01 | MT | CLCS[S]VRPKF   | 338.05 | WT | CLCS[A]VRPKF   | 353.17   | 10 | 5.58729  |
| Se026 | ITIH5 R399G    | HLA-C*03:04 | MT | Y[G]FLTPFTSM   | 16.28  | WT | Y[R]FLTPFTSM   | 346.73   | 10 | 8.02168  |
| Se026 | ITIH5 R399G    | HLA-B*15:01 | MT | AQALAVSY[G]F   | 23.83  | WT | AQALAVSY[R]F   | 31.68    | 10 | 8.02168  |
| Se026 | ITIH5 R399G    | HLA-B*15:01 | MT | VSY[G]FLTPF    | 31.55  | WT | VSY[R]FLTPF    | 39.67    | 9  | 8.02168  |
| Se026 | ITIH5 R399G    | HLA-B*15:01 | MT | AVSY[G]FLTPF   | 35.72  | WT | AVSY[R]FLTPF   | 56.51    | 10 | 8.02168  |
| Se026 | ITIH5 R399G    | HLA-C*03:04 | MT | VSY[G]FLTPF    | 115.13 | WT | VSY[R]FLTPF    | 215.22   | 9  | 8.02168  |

|       |                  |              |    |               |        |    |               |          |    |          |
|-------|------------------|--------------|----|---------------|--------|----|---------------|----------|----|----------|
| Se026 | ITIH5 R399G      | HLA-A*26:02  | MT | AVSY[G]FLTPF  | 212.3  | WT | AVSY[R]FLTPF  | 223.41   | 10 | 8.02168  |
| Se026 | ITIH5 R399G      | HLA-C*03:04  | MT | AVSY[G]FLTPF  | 216.98 | WT | AVSY[R]FLTPF  | 429.8    | 10 | 8.02168  |
| Se026 | ITIH5 R399G      | HLA-B*15:01  | MT | Y[G]FLTPFTSM  | 466.3  | WT | Y[R]FLTPFTSM  | 2937.36  | 10 | 8.02168  |
| Se026 | ITIH5 R399G      | HLA-C*15:02  | MT | VSY[G]FLTPF   | 482.76 | WT | VSY[R]FLTPF   | 550.59   | 9  | 8.02168  |
| Se026 | NCOA4 F246V      | HLA-A*26:02  | MT | N[V]FNNVGGNL  | 242.09 | WT | N[F]FNNVGGNL  | 8758.9   | 10 | 36.45984 |
| Se026 | NCOA4 F246V      | HLA-A*26:02  | MT | QTSSRACN[V]F  | 342.22 | WT | QTSSRACN[F]F  | 196.56   | 10 | 36.45984 |
| Se026 | NCOA4 F246V      | HLA-B*15:01  | MT | TSSRACN[V]F   | 420.47 | WT | TSSRACN[F]F   | 1378.44  | 9  | 36.45984 |
| Se026 | NCOA4 F246V      | HLA-B*15:01  | MT | QTSSRACN[V]F  | 440.8  | WT | QTSSRACN[F]F  | 1238.53  | 10 | 36.45984 |
| Se026 | NCOA4 F246V      | HLA-C*15:02  | MT | RACN[V]FNNV   | 497.68 | WT | RACN[F]FNNV   | 287.78   | 9  | 36.45984 |
| Se026 | NR1H4 1478N      | HLA-A*24:02  | MT | KFTPLLCE[N]W  | 247.15 | WT | KFTPLLCE[I]W  | 323.99   | 10 | 4.43142  |
| Se026 | DACT1 N766S      | HLA-C*15:02  | MT | H[S]HPAKTFV   | 351.42 | WT | H[N]HPAKTFV   | 10877.83 | 9  | 12.39553 |
| Se026 | CSPG4 H1548L     | HLA-B*15:01  | MT | S[L]RGTLDGGF  | 188.62 | WT | S[H]RGTLDGGF  | 13338.88 | 10 | 2.46812  |
| Se026 | SETBP1 Q1000L    | HLA-A*24:02  | MT | HYYPVPIYI[Q]  | 17.97  | WT | HYYPVPIYI[Q]  | 4039.81  | 9  | 1.78041  |
| Se026 | SETBP1 Q1000L    | HLA-C*03:04  | MT | YI[Q]YDPLLYL  | 66.52  | WT | YI[Q]YDPLLYL  | 108.51   | 10 | 1.78041  |
| Se026 | SETBP1 Q1000L    | HLA-C*15:02  | MT | I[L]YDPLLYL   | 267.75 | WT | I[Q]YDPLLYL   | 319.8    | 9  | 1.78041  |
| Se026 | SETBP1 Q1000L    | HLA-C*03:04  | MT | I[L]YDPLLYL   | 377.07 | WT | I[Q]YDPLLYL   | 800.82   | 9  | 1.78041  |
| Se026 | SETBP1 Q1000L    | HLA-C*03:04  | MT | VPYI[Q]YDPL   | 385.45 | WT | VPYI[Q]YDPL   | 533.9    | 9  | 1.78041  |
| Se026 | SETBP1 Q1000L    | HLA-A*24:02  | MT | YYPVPIYI[Q]   | 429.59 | WT | YYPVPIYI[Q]   | 698.26   | 9  | 1.78041  |
| Se026 | SETBP1 Q1000L    | HLA-C*15:02  | MT | YI[Q]YDPLLYL  | 477.02 | WT | YI[Q]YDPLLYL  | 723.67   | 10 | 1.78041  |
| Se026 | MYO5B V1703A     | HLA-A*26:02  | MT | D[A]CSWSTGM   | 135.52 | WT | D[V]CSWSTGM   | 13.77    | 9  | 5.21686  |
| Se026 | ARID3A C327Y     | HLA-B*15:01  | MT | YMKYLYPYE[Y]  | 26.77  | WT | YMKYLYPYE[C]  | 4284.82  | 10 | 1.04472  |
| Se026 | ARID3A C327Y     | HLA-C*03:04  | MT | YPYE[Y]EKRG   | 413.76 | WT | YPYE[C]EKRG   | 321.4    | 10 | 1.04472  |
| Se026 | ARID3A C327Y     | HLA-A*26:02  | MT | YMKYLYPYE[Y]  | 483.29 | WT | YMKYLYPYE[C]  | 24270.11 | 10 | 1.04472  |
| Se026 | DLGAP4 P53S      | HLA-A*26:02  | MT | N[L]S[GDGLF   | 91.92  | WT | N[L]P[GDGLF   | 114.67   | 9  | 17.87983 |
| Se026 | DLGAP4 P53S      | HLA-C*03:04  | MT | TL[S]GDGLFPL  | 454.17 | WT | TL[P]GDGLFPL  | 987.33   | 10 | 17.87983 |
| Se026 | OPHN1 H150N      | HLA-C*03:04  | MT | YSLDRHL[N]L   | 105.07 | WT | YSLDRHL[H]L   | 90.98    | 10 | 1.61009  |
| Se026 | OPHN1 H150N      | HLA-C*15:02  | MT | YSLDRHL[N]L   | 208.92 | WT | YSLDRHL[H]L   | 186.76   | 10 | 1.61009  |
| Se029 | VPS13D Q502L     | HLA-A*02:06  | MT | HVFAKLN[L]L   | 78.76  | WT | HVFAKLN[Q]L   | 11710.87 | 9  | 3.11671  |
| Se029 | VPS13D Q502L     | HLA-A*02:06  | MT | HVFAKLN[L]L   | 97.53  | WT | HVFAKLN[Q]L   | 175.14   | 10 | 3.11671  |
| Se029 | VPS13D Q502L     | HLA-C*14:02  | MT | VFAKLN[L]L    | 159.32 | WT | VFAKLN[Q]L    | 286.76   | 9  | 3.11671  |
| Se029 | VPS13D Q502L     | HLA-A*02:06  | MT | L[L]LQRGTVTL  | 269.94 | WT | L[Q]LQRGTVTL  | 129.06   | 10 | 3.11671  |
| Se029 | VPS13D Q502L     | HLA-A*24:02  | MT | VFAKLN[L]L    | 286.74 | WT | VFAKLN[Q]L    | 684.89   | 9  | 3.11671  |
| Se029 | VPS13D Q502L     | HLA-A*02:06  | MT | [L]LQRGTVTL   | 296.98 | WT | [Q]LQRGTVTL   | 979.21   | 9  | 3.11671  |
| Se029 | VPS13D Q502L     | HLA-C*12:02  | MT | HVFAKLN[L]L   | 386.71 | WT | HVFAKLN[Q]L   | 16469.19 | 9  | 3.11671  |
| Se029 | VPS13D Q502L     | HLA-A*02:06  | MT | [L]LQRGTVTL   | 445.59 | WT | [Q]LQRGTVTL   | 1428.87  | 10 | 3.11671  |
| Se029 | VPS13D Q502L     | HLA-C*14:02  | MT | HVFAKLN[Q]L   | 489.12 | WT | HVFAKLN[Q]L   | 19982.19 | 9  | 3.11671  |
| Se029 | VWA5A H190Y      | HLA-A*02:06  | MT | ATIDSQ[Y]GI   | 30.93  | WT | ATIDSQ[H]GI   | 95.44    | 9  | 11.72248 |
| Se032 | KLHL21 S401Y     | HLA-C*14:03  | MT | D[Y]WEALQPM   | 98.96  | WT | D[S]WEALQPM   | 3447.45  | 9  | 6.17063  |
| Se032 | KLHL21 S401Y     | HLA-C*14:03  | MT | [Y]WEALQPMY   | 253.03 | WT | [S]WEALQPMY   | 1525.33  | 10 | 6.17063  |
| Se032 | CAMTA1 A1381T    | HLA-B*44:03  | MT | [T]JENECEGQPM | 284.74 | WT | [A]JENECEGQPM | 92.7     | 10 | 4.24552  |
| Se032 | VGLL4 M199K      | HLA-A*02:197 | MT | [K]VSHSHSPSV  | 310.59 | WT | [M]VSHSHSPSV  | 108.09   | 10 | 55.44165 |
| Se032 | NOP16 L53V       | HLA-C*14:03  | MT | SVRQN[V]AEM   | 153.81 | WT | SVRQN[L]AEM   | 151.04   | 9  | 7.04687  |
| Se032 | NOP16 L53V       | HLA-B*15:01  | MT | SVRQN[V]AEM   | 359.61 | WT | SVRQN[L]AEM   | 349.59   | 9  | 7.04687  |
| Se032 | RREB1 L9W        | HLA-B*44:03  | MT | [W]EGSDLSI    | 474.24 | WT | [L]EGSDLSI    | 1038.26  | 9  | 2.35152  |
| Se032 | PLPP6 I183F      | HLA-A*02:197 | MT | LLVAL[F]KGL   | 127.38 | WT | LLVAL[I]KGL   | 115.51   | 10 | 8.51058  |
| Se032 | PLPP6 I183F      | HLA-A*02:197 | MT | LLVAL[F]KGLV  | 256.26 | WT | LLVAL[I]KGLV  | 218.29   | 10 | 8.51058  |
| Se032 | PLPP6 I183F      | HLA-A*02:197 | MT | LLVAL[F]KGL   | 390.41 | WT | LLVAL[I]KGL   | 145.05   | 9  | 8.51058  |
| Se032 | CLIC3 S222I      | HLA-B*15:01  | MT | H[I]AEILAA    | 32.44  | WT | H[S]AEILAA    | 27.68    | 9  | 14.40284 |
| Se032 | CLIC3 S222I      | HLA-C*14:03  | MT | KYTCPH[I]AEI  | 118.99 | WT | KYTCPH[S]AEI  | 128.9    | 10 | 14.40284 |
| Se032 | CLIC3 S222I      | HLA-A*02:197 | MT | YTCPH[I]AEI   | 144.09 | WT | YTCPH[S]AEI   | 717.42   | 9  | 14.40284 |
| Se032 | CLIC3 S222I      | HLA-C*14:03  | MT | YTCPH[I]AEI   | 211.46 | WT | YTCPH[S]AEI   | 225.91   | 9  | 14.40284 |
| Se032 | CLIC3 S222I      | HLA-C*14:03  | MT | YTCPH[I]AEIL  | 249.38 | WT | YTCPH[S]AEIL  | 281.84   | 10 | 14.40284 |
| Se032 | CLIC3 S222I      | HLA-B*44:03  | MT | KEFKYTCPH[I]  | 251.63 | WT | KEFKYTCPH[S]  | 2829.52  | 10 | 14.40284 |
| Se032 | WAPL T1125R      | HLA-C*14:03  | MT | SY[R]ALLGCL   | 93.05  | WT | SY[T]ALLGCL   | 111.11   | 10 | 7.89436  |
| Se032 | WAPL T1125R      | HLA-C*14:03  | MT | IVASY[R]ALL   | 153.83 | WT | IVASY[T]ALL   | 102.51   | 9  | 7.89436  |
| Se032 | WAPL T1125R      | HLA-C*14:03  | MT | IVASY[R]ALLL  | 214.82 | WT | IVASY[T]ALLL  | 179.19   | 10 | 7.89436  |
| Se032 | WAPL T1125R      | HLA-C*14:03  | MT | Y[R]ALLGCL    | 353.97 | WT | Y[T]ALLGCL    | 939.1    | 9  | 7.89436  |
| Se032 | IFT46 D180N      | HLA-A*02:197 | MT | AI[N]TWIESI   | 219.38 | WT | AI[D]TWIESI   | 330.81   | 9  | 32.66939 |
| Se032 | ARID2 H48Q       | HLA-B*44:03  | MT | KELDL[Q]GLY   | 52.59  | WT | KELDL[H]GLY   | 51.34    | 9  | 5.1643   |
| Se032 | NCOR2 G1872S     | HLA-A*02:197 | MT | GMK[S]IITAV   | 55.26  | WT | GMK[G]IITAV   | 76.38    | 9  | 9.08906  |
| Se032 | CSPG4 S1188Y     | HLA-A*02:197 | MT | [Y]QQDLLDGAV  | 182.87 | WT | [S]QQDLLDGAV  | 971.2    | 10 | 1.49384  |
| Se032 | CSPG4 S1188Y     | HLA-B*15:01  | MT | RAGQPATAF[Y]  | 410.86 | WT | RAGQPATAF[S]  | 23241.29 | 10 | 1.49384  |
| Se032 | CSPG4 S1188Y     | HLA-B*15:01  | MT | AGQPATAF[Y]   | 435.66 | WT | AGQPATAF[S]   | 27932.75 | 9  | 1.49384  |
| Se032 | CSPG4 S1188Y     | HLA-A*02:197 | MT | [Y]QQDLLDGA   | 454.65 | WT | [S]QQDLLDGA   | 3830.63  | 9  | 1.49384  |
| Se032 | ABCC1 I741M      | HLA-A*02:197 | MT | [M]QACALLPDL  | 90.82  | WT | [I]QACALLPDL  | 353.52   | 10 | 13.3172  |
| Se032 | ABCC1 I741M      | HLA-C*14:03  | MT | YRSV[M]QACAL  | 111.33 | WT | YRSV[I]QACAL  | 139.26   | 10 | 13.3172  |
| Se032 | ABCC1 I741M      | HLA-C*14:03  | MT | SV[M]QACALL   | 119.87 | WT | SV[I]QACALL   | 419.47   | 9  | 13.3172  |
| Se032 | ABCC1 I741M      | HLA-C*14:03  | MT | YRSV[M]QACA   | 162.89 | WT | YRSV[I]QACA   | 189.09   | 10 | 13.3172  |
| Se032 | ABCC1 I741M      | HLA-C*14:03  | MT | YRSV[M]QAC    | 227.45 | WT | YRSV[I]QAC    | 200.12   | 9  | 13.3172  |
| Se032 | ABCC1 I741M      | HLA-B*15:01  | MT | [M]QACALLPDL  | 293.79 | WT | [I]QACALLPDL  | 806.98   | 10 | 13.3172  |
| Se032 | ABCC1 I741M      | HLA-A*02:197 | MT | SV[M]QACALL   | 367.77 | WT | SV[I]QACALL   | 991.31   | 9  | 13.3172  |
| Se032 | TP53 G134R       | HLA-A*02:197 | MT | NLL[R]JRNSEFV | 33.46  | WT | NLL[G]JRNSEFV | 14.87    | 10 | 28.74253 |
| Se032 | TP53 G134R       | HLA-A*02:197 | MT | LL[R]JRNSEFV  | 89.25  | WT | LL[G]JRNSEFV  | 10.74    | 9  | 28.74253 |
| Se032 | ST6GALNAC1 R391P | HLA-C*14:03  | MT | YVFP[IL]SGAL  | 30.7   | WT | YVFP[R]LSGAL  | 86.68    | 9  | 5.43437  |
| Se032 | ST6GALNAC1 R391P | HLA-A*02:197 | MT | YVFP[IL]SGALI | 114.28 | WT | YVFP[R]LSGALI | 284.74   | 10 | 5.43437  |
| Se032 | ST6GALNAC1 R391P | HLA-C*14:03  | MT | YVFP[IL]SGALI | 149.11 | WT | YVFP[R]LSGALI | 462.41   | 10 | 5.43437  |
| Se032 | ST6GALNAC1 R391P | HLA-A*02:197 | MT | YVFP[IL]SGAL  | 178.75 | WT | YVFP[R]LSGAL  | 419.66   | 9  | 5.43437  |
| Se032 | ST6GALNAC1 R391P | HLA-C*14:03  | MT | VF[IL]SGALI   | 188.49 | WT | VF[R]LSGALI   | 426.99   | 9  | 5.43437  |

|       |                  |             |    |               |        |    |               |          |    |          |
|-------|------------------|-------------|----|---------------|--------|----|---------------|----------|----|----------|
| Se032 | ST6GALNAC1 R391P | HLA-B*15:01 | MT | YVF[P]LSGAL   | 330.09 | WT | YVF[R]LSGAL   | 421.67   | 9  | 5.43437  |
| Se032 | ST6GALNAC1 R391P | HLA-C*08:03 | MT | YVF[P]LSGAL   | 335    | WT | YVF[R]LSGAL   | 1038.13  | 9  | 5.43437  |
| Se032 | ST6GALNAC1 R391P | HLA-C*14:03 | MT | DYVFP[LSGAL   | 477.62 | WT | DYVFR[LSGAL   | 543.44   | 10 | 5.43437  |
| Se032 | SERPINB5 F354S   | HLA-B*15:01 | MT | ELNADHP[S]IY  | 498.83 | WT | ELNADHP[F]IY  | 809.36   | 10 | 4.71335  |
| Se032 | JAM2 Y43F        | HLA-B*15:01 | MT | QQVVTAVE[F]   | 67.59  | WT | QQVVTAVE[Y]   | 71.29    | 9  | 3.78943  |
| Se034 | CEP104 A895T     | HLA-B*39:01 | MT | SAVA[T]SGPL   | 368.3  | WT | SAVA[A]SGPL   | 433.53   | 9  | 2.68198  |
| Se034 | DDAH1 P96R       | HLA-A*33:03 | MT | TALITRPGA[R]  | 70.43  | WT | TALITRPGA[P]  | 33769.78 | 10 | 17.65337 |
| Se034 | DDAH1 P96R       | HLA-A*33:03 | MT | ITRPGA[R]SRR  | 153.61 | WT | ITRPGA[P]SRR  | 223.22   | 10 | 17.65337 |
| Se034 | DDAH1 P96R       | HLA-A*33:03 | MT | ITRPGA[R]SR   | 384.81 | WT | ITRPGA[P]SR   | 242.65   | 9  | 17.65337 |
| Se034 | VTCN1 S44L       | HLA-B*39:01 | MT | HSITVTTVA[L]  | 220.8  | WT | HSITVTTVA[S]  | 17839.71 | 10 | 93.28337 |
| Se034 | CAD L1342V       | HLA-A*33:03 | MT | [V]SSFVTKGYR  | 172.95 | WT | [L]SSFVTKGYR  | 94.39    | 10 | 7.16821  |
| Se034 | POLR1A Y792D     | HLA-B*39:01 | MT | LQL[D]RGFTL   | 94.6   | WT | LQL[Y]RGFTL   | 132.72   | 9  | 5.69411  |
| Se034 | POLR1A Y792D     | HLA-C*14:03 | MT | YLQL[D]RGFTL  | 183.55 | WT | YLQL[Y]RGFTL  | 147.56   | 10 | 5.69411  |
| Se034 | POLR1A Y792D     | HLA-A*33:03 | MT | FTAYLQL[D]R   | 240.01 | WT | FTAYLQL[Y]R   | 13.05    | 9  | 5.69411  |
| Se034 | POLR1A Y792D     | HLA-C*14:03 | MT | AYLQL[D]RGF   | 309.05 | WT | AYLQL[Y]RGF   | 136.54   | 9  | 5.69411  |
| Se034 | CXCR4 A251G      | HLA-A*26:01 | MT | TVILIL[G]FF   | 189.18 | WT | TVILIL[A]FF   | 204.9    | 9  | 91.2426  |
| Se034 | CXCR4 A251G      | HLA-C*14:03 | MT | [G]FFACWLPY   | 340.79 | WT | [A]FFACWLPY   | 135.55   | 9  | 91.2426  |
| Se034 | STK16 Q124E      | HLA-B*44:03 | MT | D[E]JLWLLGI   | 212.9  | WT | D[Q]JLWLLGI   | 7009.93  | 10 | 9.37189  |
| Se034 | PDE6D V122I      | HLA-B*39:01 | MT | SQMMPAS[I]L   | 37.7   | WT | SQMMPAS[V]L   | 25.13    | 9  | 9.50154  |
| Se034 | PDE6D V122I      | HLA-C*14:03 | MT | SQMMPAS[I]L   | 233.97 | WT | SQMMPAS[V]L   | 209.19   | 9  | 9.50154  |
| Se034 | MRPL1 Y148F      | HLA-C*14:03 | MT | FTSVLSLP[F]   | 71.6   | WT | FTSVLSLP[Y]   | 165.67   | 9  | 28.52873 |
| Se034 | MRPL1 Y148F      | HLA-C*14:03 | MT | SVLSLP[F]PF   | 231.77 | WT | SVLSLP[Y]PF   | 221.62   | 9  | 28.52873 |
| Se034 | RAP1GDS1 L144M   | HLA-A*26:01 | MT | IVIDLRS[M]    | 23.92  | WT | IVIDLRS[L]    | 246.78   | 9  | 6.68089  |
| Se034 | RAP1GDS1 L144M   | HLA-C*14:03 | MT | IVIDLRS[M]    | 104.76 | WT | IVIDLRS[L]    | 116.36   | 9  | 6.68089  |
| Se034 | RAP1GDS1 L144M   | HLA-B*39:01 | MT | DHLRS[M]CSI   | 237.99 | WT | DHLRS[L]CSI   | 228.55   | 9  | 6.68089  |
| Se034 | RAP1GDS1 L144M   | HLA-C*07:02 | MT | IVIDLRS[M]    | 419.91 | WT | IVIDLRS[L]    | 610.06   | 9  | 6.68089  |
| Se034 | CENPE K827N      | HLA-B*39:01 | MT | [N]EAKQFDSSL  | 289.05 | WT | [K]EAKQFDSSL  | 4041.14  | 10 | 2.19362  |
| Se034 | UBR2 H709N       | HLA-A*33:03 | MT | [N]JFLMIMLSR  | 35.55  | WT | [H]JFLMIMLSR  | 26.87    | 9  | 5.67003  |
| Se034 | UBR2 H709N       | HLA-A*33:03 | MT | N[J]FLMIMLSR  | 37.97  | WT | N[H]JFLMIMLSR | 310.41   | 10 | 5.67003  |
| Se034 | UBR2 H709N       | HLA-C*14:03 | MT | SMMDPN[N]JFLM | 49.13  | WT | SMMDPN[H]JFLM | 39.49    | 10 | 5.67003  |
| Se034 | UBR2 H709N       | HLA-C*14:03 | MT | MMDPN[N]JFLM  | 87.91  | WT | MMDPN[H]JFLM  | 44.22    | 9  | 5.67003  |
| Se034 | UBR2 H709N       | HLA-C*14:03 | MT | SMMDPN[N]JFL  | 95.64  | WT | SMMDPN[H]JFL  | 98.84    | 9  | 5.67003  |
| Se034 | UBR2 H709N       | HLA-B*39:01 | MT | MMDPN[N]JFLM  | 175.66 | WT | MMDPN[H]JFLM  | 116.91   | 9  | 5.67003  |
| Se034 | UBR2 H709N       | HLA-C*07:02 | MT | MMDPN[N]JFLM  | 198.12 | WT | MMDPN[H]JFLM  | 87.12    | 9  | 5.67003  |
| Se034 | UBR2 H709N       | HLA-C*14:03 | MT | MMDPN[N]JFLMI | 233.51 | WT | MMDPN[H]JFLMI | 230.12   | 10 | 5.67003  |
| Se034 | UBR2 H709N       | HLA-B*39:01 | MT | SMMDPN[N]JFL  | 244.99 | WT | SMMDPN[H]JFL  | 75.66    | 9  | 5.67003  |
| Se034 | UBR2 H709N       | HLA-C*07:02 | MT | SMMDPN[N]JFLM | 305.32 | WT | SMMDPN[H]JFLM | 173.07   | 10 | 5.67003  |
| Se034 | UBR2 H709N       | HLA-B*39:01 | MT | MMDPN[N]JFLMI | 330.12 | WT | MMDPN[H]JFLMI | 276.58   | 10 | 5.67003  |
| Se034 | UBR2 H709N       | HLA-B*39:01 | MT | SMMDPN[N]JFLM | 330.13 | WT | SMMDPN[H]JFLM | 212.12   | 10 | 5.67003  |
| Se034 | TSPYL4 G52C      | HLA-C*14:03 | MT | VMANTGG[G]JSL | 320.92 | WT | VMANTGG[G]JSL | 433.25   | 10 | 22.33287 |
| Se034 | TSPYL4 G52C      | HLA-B*39:01 | MT | MANTGG[G]JSL  | 367.69 | WT | MANTGG[G]JSL  | 742.52   | 9  | 22.33287 |
| Se034 | TSPYL4 G52C      | HLA-C*14:03 | MT | MANTGG[G]JSL  | 499.95 | WT | MANTGG[G]JSL  | 455.92   | 9  | 22.33287 |
| Se034 | ERMARD L117Q     | HLA-B*39:01 | MT | [S]QJQSPAISL  | 55.88  | WT | [L]QJQSPAISL  | 832.49   | 9  | 4.52452  |
| Se034 | ERMARD L117Q     | HLA-B*39:01 | MT | [Q]QJQSPAISL  | 64.68  | WT | [L]QJQSPAISL  | 111.4    | 10 | 4.52452  |
| Se034 | ERMARD L117Q     | HLA-B*44:03 | MT | LES[Q]QSPA    | 280.81 | WT | LES[L]QSPA    | 340.52   | 9  | 4.52452  |
| Se034 | VCPIP1 D974G     | HLA-B*39:01 | MT | FPIGP[D]VEDL  | 307.34 | WT | FPIGP[D]VEDL  | 453.4    | 10 | 3.36742  |
| Se034 | DAPK1 K175N      | HLA-C*14:03 | MT | F[N]NIFGTPEF  | 378.88 | WT | F[K]NIFGTPEF  | 531.76   | 10 | 2.68003  |
| Se034 | DAPK1 K175N      | HLA-C*14:03 | MT | FGNEF[N]NIF   | 470.16 | WT | FGNEF[K]NIF   | 741.62   | 9  | 2.68003  |
| Se034 | LRMAM1 E161V     | HLA-A*26:01 | MT | N[V]IQRLPQM   | 68.05  | WT | N[E]IQRLPQM   | 8585.42  | 9  | 4.83457  |
| Se034 | LRMAM1 E161V     | HLA-A*33:03 | MT | NISGN[V]IQR   | 247.86 | WT | NISGN[E]IQR   | 600.57   | 9  | 4.83457  |
| Se034 | LRMAM1 E161V     | HLA-A*33:03 | MT | LNISGN[V]IQR  | 440.83 | WT | LNISGN[E]IQR  | 1097.65  | 10 | 4.83457  |
| Se034 | AP3M1 R169W      | HLA-B*44:03 | MT | GQLSNIPWR[W]  | 437.47 | WT | GQLSNIPWR[R]  | 25035.63 | 10 | 5.85345  |
| Se034 | ZNF143 T321S     | HLA-A*33:03 | MT | HVRTH[T]JGER  | 55.4   | WT | HVRTH[T]JGER  | 39.88    | 9  | 5.88257  |
| Se034 | AMPD3 N231Y      | HLA-C*14:03 | MT | KF[Y]SKYNPV   | 84.38  | WT | KF[N]SKYNPV   | 382.27   | 9  | 2.36831  |
| Se034 | AMPD3 N231Y      | HLA-C*14:03 | MT | F[Y]SKYNPVGA  | 272.92 | WT | F[N]SKYNPVGA  | 12068.58 | 10 | 2.36831  |
| Se034 | AMPD3 N231Y      | HLA-C*07:02 | MT | HRFDK[F]NISKY | 445.29 | WT | HRFDK[F]NISKY | 601.92   | 10 | 2.36831  |
| Se034 | NUMA1 R958S      | HLA-B*39:01 | MT | [S]JQFCSTQAAL | 20.11  | WT | [R]JQFCSTQAAL | 75.6     | 10 | 45.46748 |
| Se034 | NUMA1 R958S      | HLA-C*14:03 | MT | [S]JQFCSTQAAL | 221.53 | WT | [R]JQFCSTQAAL | 245.41   | 10 | 45.46748 |
| Se034 | SYTL2 K557N      | HLA-B*39:01 | MT | [N]RMSKSVPAF  | 79.37  | WT | [K]RMSKSVPAF  | 1367.6   | 10 | 1.78352  |
| Se034 | SYTL2 K557N      | HLA-C*07:02 | MT | [N]RMSKSVPAF  | 136.69 | WT | [K]RMSKSVPAF  | 91.81    | 10 | 1.78352  |
| Se034 | SYTL2 K557N      | HLA-C*14:03 | MT | [N]RMSKSVPAF  | 146.09 | WT | [K]RMSKSVPAF  | 65.8     | 10 | 1.78352  |
| Se034 | SYTL2 K557N      | HLA-B*39:01 | MT | [N]RMSKSVPA   | 205.57 | WT | [K]RMSKSVPA   | 2121.35  | 9  | 1.78352  |
| Se034 | NCOR2 N429I      | HLA-C*14:03 | MT | VYKDRQVM[I]M  | 56.73  | WT | VYKDRQVM[N]M  | 84.05    | 10 | 10.69321 |
| Se034 | NCOR2 N429I      | HLA-C*07:02 | MT | VYKDRQVM[I]M  | 186.27 | WT | VYKDRQVM[N]M  | 230.31   | 10 | 10.69321 |
| Se034 | NCOR2 N429I      | HLA-B*39:01 | MT | YKDRQVM[I]M   | 271.51 | WT | YKDRQVM[N]M   | 862.97   | 9  | 10.69321 |
| Se034 | NCOR2 N429I      | HLA-C*14:03 | MT | VYKDRQVM[I]   | 337.6  | WT | VYKDRQVM[N]   | 14777.09 | 9  | 10.69321 |
| Se034 | CDH24 Y349F      | HLA-A*33:03 | MT | TLIDPA[F]LR   | 23.79  | WT | TLIDPA[Y]LR   | 23.35    | 9  | 1.47651  |
| Se034 | CDH24 Y349F      | HLA-A*33:03 | MT | NTLIDPA[F]LR  | 30.49  | WT | NTLIDPA[Y]LR  | 29.88    | 10 | 1.47651  |
| Se034 | CDH24 Y349F      | HLA-A*33:03 | MT | TLIDPA[F]LRR  | 78.78  | WT | TLIDPA[Y]LRR  | 96.75    | 10 | 1.47651  |
| Se034 | ZNF689 L449Q     | HLA-B*39:01 | MT | SHLAQHQ[L]JL  | 116.4  | WT | SHLAQHQ[L]JL  | 99.75    | 9  | 1.64091  |
| Se034 | TOMM34 S135L     | HLA-B*39:01 | MT | NRMTRALMD[L]  | 39.29  | WT | NRMTRALMD[S]  | 7796.24  | 10 | 40.94488 |
| Se034 | TOMM34 S135L     | HLA-C*07:02 | MT | NRMTRALMD[L]  | 129.58 | WT | NRMTRALMD[S]  | 13566.23 | 10 | 40.94488 |
| Se034 | TOMM34 S135L     | HLA-C*14:03 | MT | NRMTRALMD[L]  | 379.1  | WT | NRMTRALMD[S]  | 16622.03 | 10 | 40.94488 |
| Se034 | MMP9 V348A       | HLA-B*44:03 | MT | GELC[A]FPFTF  | 51.53  | WT | GELC[V]FPFTF  | 61.6     | 10 | 6.70295  |
| Se034 | ZNFX1 L217F      | HLA-A*33:03 | MT | ILKNSKF[F]K   | 277.89 | WT | ILKNSKF[L]K   | 700.27   | 9  | 15.77017 |
| Se034 | ZNFX1 L217F      | HLA-C*14:03 | MT | F[F]KVCLPAY   | 324.61 | WT | F[L]KVCLPAY   | 1165.81  | 9  | 15.77017 |
| Se034 | ZNFX1 L217F      | HLA-C*14:03 | MT | F[F]KVCLPAYV  | 427.16 | WT | F[L]KVCLPAYV  | 1453.64  | 10 | 15.77017 |
| Se035 | SYTL1 P278L      | HLA-C*14:02 | MT | HYE[L]GAAEL   | 40.33  | WT | HYE[P]GAAEL   | 21.1     | 9  | 7.15714  |

|       |               |             |    |               |        |    |               |          |    |           |
|-------|---------------|-------------|----|---------------|--------|----|---------------|----------|----|-----------|
| Se035 | SYTL1 P278L   | HLA-C*14:02 | MT | SVHFFALHYE[L] | 221.87 | WT | SVHFFALHYE[P] | 19899.8  | 10 | 7.15714   |
| Se035 | SYTL1 P278L   | HLA-C*03:03 | MT | SVHFFALHYE[L] | 297.27 | WT | SVHFFALHYE[P] | 29883.34 | 10 | 7.15714   |
| Se035 | SYTL1 P278L   | HLA-C*03:03 | MT | LHYE[L]GAAEL  | 406.77 | WT | LHYE[P]GAAEL  | 222.28   | 10 | 7.15714   |
| Se035 | SYTL1 P278L   | HLA-C*14:02 | MT | LHYE[L]GAAEL  | 474.05 | WT | LHYE[P]GAAEL  | 371.08   | 10 | 7.15714   |
| Se035 | SYTL1 P278L   | HLA-C*03:03 | MT | FALHYE[L]GAA  | 497.99 | WT | FALHYE[P]GAA  | 495.68   | 10 | 7.15714   |
| Se035 | PLXNA2 V100A  | HLA-C*03:03 | MT | I[A]QPCSEVL   | 34.8   | WT | I[V]QPCSEVL   | 291.61   | 9  | 2.7587    |
| Se035 | PLXNA2 V100A  | HLA-C*03:03 | MT | LI[A]QPCSEVL  | 182.81 | WT | LI[V]QPCSEVL  | 195.69   | 10 | 2.7587    |
| Se035 | OBSCN R2628H  | HLA-C*03:03 | MT | AGIV[H]ASSL   | 328.29 | WT | AGIV[R]ASSL   | 742.18   | 9  | 3.54089   |
| Se035 | PNPT1 E355K   | HLA-A*31:01 | MT | RSIVLN[K]YKR  | 16.93  | WT | RSIVLN[E]YKR  | 26.27    | 10 | 5.61626   |
| Se035 | PNPT1 E355K   | HLA-A*31:01 | MT | SIVLN[K]YKR   | 73.66  | WT | SIVLN[E]YKR   | 257.82   | 9  | 5.61626   |
| Se035 | PNPT1 E355K   | HLA-A*31:01 | MT | RSIVLN[K]YK   | 102.75 | WT | RSIVLN[E]YK   | 127.02   | 9  | 5.61626   |
| Se035 | PNPT1 E355K   | HLA-A*31:01 | MT | VFRSIVLN[K]   | 180.82 | WT | VFRSIVLN[E]   | 18211.46 | 9  | 5.61626   |
| Se035 | WDR19 D493G   | HLA-B*35:01 | MT | YGT[G]TGVVQY  | 133.65 | WT | YGT[D]TGVVQY  | 72.08    | 10 | 5.87328   |
| Se035 | WDR19 D493G   | HLA-C*14:02 | MT | IYG[T]G]TGVV  | 299.35 | WT | IYG[D]TGVV    | 914.56   | 9  | 5.87328   |
| Se035 | WDR19 D493G   | HLA-C*03:03 | MT | FLIYGT[G]TGV  | 411.45 | WT | FLIYGT[D]TGV  | 440.96   | 10 | 5.87328   |
| Se035 | RBM27 G953R   | HLA-A*31:01 | MT | KTMSSQGR[R]   | 23.07  | WT | KTMSSQGR[G]   | 19613.75 | 9  | 5.93774   |
| Se035 | RBM27 G953R   | HLA-A*31:01 | MT | KTMSSQGR[R]R  | 24.43  | WT | KTMSSQGR[G]R  | 21.14    | 10 | 5.93774   |
| Se035 | RBM27 G953R   | HLA-A*31:01 | MT | MSSQGR[R]RGR  | 114.03 | WT | MSSQGR[G]RGR  | 201.3    | 10 | 5.93774   |
| Se035 | RBM27 G953R   | HLA-A*31:01 | MT | SSQGR[R]RGR   | 213.6  | WT | SSQGR[G]RGR   | 538.51   | 9  | 5.93774   |
| Se035 | RBM27 G953R   | HLA-A*31:01 | MT | TMSSQGR[R]R   | 270.25 | WT | TMSSQGR[G]R   | 292.79   | 9  | 5.93774   |
| Se035 | RBM27 G953R   | HLA-A*31:01 | MT | SQGR[R]RGRGR  | 350.96 | WT | SQGR[G]RGRGR  | 721.5    | 10 | 5.93774   |
| Se035 | CD74 G267R    | HLA-C*14:02 | MT | R[R]HHNCSESL  | 385.47 | WT | R[G]HHNCSESL  | 551.24   | 10 | 2990.6345 |
| Se035 | FAM193B D461N | HLA-C*14:02 | MT | RLEW[P]N]REL  | 254.39 | WT | RLEW[P]D]REL  | 533.03   | 10 | 22.71409  |
| Se035 | FAM193B D461N | HLA-C*03:03 | MT | RLEW[P]N]REL  | 438.15 | WT | RLEW[P]D]REL  | 652.13   | 10 | 22.71409  |
| Se035 | FILIP1 R125P  | HLA-B*35:01 | MT | L[P]VLHRDAIL  | 168.62 | WT | L[R]VLHRDAIL  | 26636.94 | 10 | 4.07153   |
| Se035 | FILIP1 R125P  | HLA-B*35:01 | MT | L[P]VLHRDAI   | 277.01 | WT | L[R]VLHRDAI   | 27328.57 | 9  | 4.07153   |
| Se035 | IMMP2L R155H  | HLA-A*31:01 | MT | ILWPPE[H]WQK  | 145.55 | WT | ILWPPE[R]WQK  | 176.71   | 10 | 9.17633   |
| Se035 | IMMP2L R155H  | HLA-C*14:02 | MT | LWPPE[H]WQKL  | 195.08 | WT | LWPPE[R]WQKL  | 180.08   | 10 | 9.17633   |
| Se035 | DSCC1 H376Y   | HLA-C*03:03 | MT | YS[Y]SSMQNGV  | 86.82  | WT | YS[H]SSMQNGV  | 196.87   | 10 | 2.82197   |
| Se035 | DSCC1 H376Y   | HLA-C*14:02 | MT | S[Y]SSMQNGV   | 226.06 | WT | S[H]SSMQNGV   | 10665.25 | 9  | 2.82197   |
| Se035 | DSCC1 H376Y   | HLA-C*14:02 | MT | YS[Y]SSMQNGV  | 255.03 | WT | YS[H]SSMQNGV  | 670.73   | 10 | 2.82197   |
| Se035 | DSCC1 H376Y   | HLA-C*03:03 | MT | LLTKYS[Y]SSM  | 431.65 | WT | LLTKYS[H]SSM  | 280.47   | 10 | 2.82197   |
| Se035 | DSCC1 H376Y   | HLA-A*26:01 | MT | LTKYS[Y]SSM   | 467.48 | WT | LTKYS[H]SSM   | 1085.67  | 9  | 2.82197   |
| Se035 | ANK3 D349G    | HLA-B*35:01 | MT | VPVDDVTN[G]Y  | 9.88   | WT | VPVDDVTN[D]Y  | 10.33    | 10 | 1.00013   |
| Se035 | ANK3 D349G    | HLA-C*03:03 | MT | VTN[G]YLTAL   | 163.21 | WT | VTN[D]YLTAL   | 82.04    | 9  | 1.00013   |
| Se035 | GBF1 K1029R   | HLA-C*14:02 | MT | GW[R]NIMEAM   | 280.78 | WT | GW[K]NIMEAM   | 431.28   | 9  | 14.77847  |
| Se035 | GBF1 K1029R   | HLA-C*14:02 | MT | ILREGW[R]NIM  | 318.42 | WT | ILREGW[K]NIM  | 952.86   | 10 | 14.77847  |
| Se035 | FAM24B A32P   | HLA-A*31:01 | MT | KIHNA[K]P]AK  | 357.62 | WT | KIHNA[K]A]AK  | 249.44   | 10 | 4.01011   |
| Se035 | KCTD12 R8S    | HLA-C*03:03 | MT | MALADST[S]GL  | 9.99   | WT | MALADST[R]JGL | 17.71    | 10 | 15.4132   |
| Se035 | KCTD12 R8S    | HLA-B*35:01 | MT | MALADST[S]GL  | 67.27  | WT | MALADST[R]JGL | 193.39   | 10 | 15.4132   |
| Se035 | KCTD12 R8S    | HLA-C*03:03 | MT | ALADST[S]JG   | 317.14 | WT | ALADST[R]JG   | 517.53   | 9  | 15.4132   |
| Se035 | KCTD12 R8S    | HLA-B*35:01 | MT | MALADST[S]G   | 420.55 | WT | MALADST[R]JG  | 3038.84  | 9  | 15.4132   |
| Se035 | CHTF18 R164C  | HLA-C*03:03 | MT | RASPA[A]C]NPV | 49.75  | WT | RASPA[A]R]NPV | 77.82    | 10 | 13.28079  |
| Se035 | CHTF18 R164C  | HLA-B*35:01 | MT | SPAA[C]NPVL   | 121.44 | WT | SPAA[R]NPVL   | 654.9    | 9  | 13.28079  |
| Se035 | CHTF18 R164C  | HLA-A*31:01 | MT | AA[C]NPVLR    | 150.49 | WT | AA[R]NPVLR    | 71.22    | 9  | 13.28079  |
| Se035 | ZNF319 C345F  | HLA-B*35:01 | MT | RPFK[F]DLCPM  | 24.96  | WT | RPFK[C]DLCPM  | 21.48    | 10 | 5.09413   |
| Se035 | ZNF319 C345F  | HLA-C*03:03 | MT | RPFK[F]DLCPM  | 401.95 | WT | RPFK[C]DLCPM  | 304.04   | 10 | 5.09413   |
| Se035 | TP53 R141H    | HLA-A*31:01 | MT | [H]V]CACPGRDR | 306.77 | WT | [R]V]CACPGRDR | 96.27    | 10 | 26.23483  |
| Se035 | METTL2A C308R | HLA-A*31:01 | MT | [R]LSGNFYVR   | 14.43  | WT | [C]LSGNFYVR   | 47.53    | 9  | 4.95604   |
| Se035 | METTL2A C308R | HLA-A*31:01 | MT | AQLRFKKGQ[R]  | 70.07  | WT | AQLRFKKGQ[C]  | 32723.07 | 10 | 4.95604   |
| Se035 | METTL2A C308R | HLA-A*31:01 | MT | QLRFKKGQ[R]   | 295.91 | WT | QLRFKKGQ[C]   | 32474.83 | 9  | 4.95604   |
| Se035 | L3MBTL4 R522M | HLA-B*35:01 | MT | HPFRDLPLG[M]  | 13.97  | WT | HPFRDLPLG[R]  | 7918.41  | 10 | 1.55211   |
| Se035 | MALT1 V156F   | HLA-B*35:01 | MT | HPF[F]YQWFK   | 37.53  | WT | HPF[V]YQWFK   | 51.04    | 9  | 4.61209   |
| Se035 | MALT1 V156F   | HLA-C*14:02 | MT | F[F]YQWFKM    | 98.39  | WT | F[V]YQWFKM    | 523.5    | 9  | 4.61209   |
| Se035 | MALT1 V156F   | HLA-A*31:01 | MT | PF[F]YQWFK    | 116.47 | WT | PF[V]YQWFK    | 952.05   | 9  | 4.61209   |
| Se035 | MALT1 V156F   | HLA-B*35:01 | MT | RATGHPP[F]YQY | 138.68 | WT | RATGHPP[V]YQY | 180.81   | 10 | 4.61209   |
| Se035 | MALT1 V156F   | HLA-A*31:01 | MT | [F]YQWFKMKNK  | 399.45 | WT | [V]YQWFKMKNK  | 189.08   | 10 | 4.61209   |
| Se035 | GSK3A R113C   | HLA-B*35:01 | MT | GPE[C]SQEVAY  | 118.51 | WT | GPE[R]SQEVAY  | 267.74   | 10 | 11.09311  |
| Se035 | GNAS A51T     | HLA-A*26:01 | MT | E[T]SGLHWSSL  | 163.33 | WT | E[A]SGLHWSSL  | 1934.25  | 10 | 314.91143 |
| Se035 | GNAS A51T     | HLA-B*35:01 | MT | SPAWE[H]TJSGL | 258.65 | WT | SPAWE[A]TJSGL | 486.3    | 9  | 314.91143 |
| Se035 | HELZ2 E276G   | HLA-A*31:01 | MT | QVSALRQ[G]LR  | 153.54 | WT | QVSALRQ[E]LR  | 141.76   | 10 | 20.13789  |
| Se035 | HELZ2 E276G   | HLA-A*31:01 | MT | VSALRQ[G]LR   | 178.67 | WT | VSALRQ[E]LR   | 192.45   | 9  | 20.13789  |
| Se035 | HELZ2 E276G   | HLA-A*31:01 | MT | SALRQ[G]LRRR  | 237.96 | WT | SALRQ[E]LRRR  | 388.21   | 10 | 20.13789  |
| Se035 | HELZ2 E276G   | HLA-A*31:01 | MT | ALRQ[G]LRRR   | 246.22 | WT | ALRQ[E]LRRR   | 388.02   | 9  | 20.13789  |
| Se035 | HELZ2 E276G   | HLA-A*31:01 | MT | SALRQ[G]LRR   | 273.77 | WT | SALRQ[E]LRR   | 370.52   | 9  | 20.13789  |
| Se035 | HELZ2 E276G   | HLA-A*31:01 | MT | VSALRQ[G]LRR  | 473.35 | WT | VSALRQ[E]LRR  | 537.39   | 10 | 20.13789  |
| Se037 | ZMYM1 L881I   | HLA-C*12:02 | MT | [I]SSERNDVYF  | 207.7  | WT | [L]SSERNDVYF  | 229.87   | 10 | 2.85047   |
| Se037 | ZMYM1 L881I   | HLA-C*12:02 | MT | [I]SSERNDVY   | 407.14 | WT | [L]SSERNDVY   | 613.61   | 9  | 2.85047   |
| Se037 | ASPM S1110C   | HLA-B*40:02 | MT | FEQY[C]ENIKL  | 70.38  | WT | FEQY[S]ENIKL  | 69.91    | 10 | 3.37614   |
| Se037 | DISC1 A473V   | HLA-B*40:02 | MT | LEAKMH[V]IS   | 385.04 | WT | LEAKMH[A]IS   | 632.99   | 9  | 2.73213   |
| Se037 | RMDN2 F154Y   | HLA-A*24:02 | MT | V[Y]NLNEIEIF  | 90.64  | WT | V[F]NLNEIEIF  | 407.47   | 10 | 1.29309   |
| Se037 | RMDN2 F154Y   | HLA-A*24:02 | MT | V[Y]NLNEIEI   | 486.15 | WT | V[F]NLNEIEI   | 2767.06  | 9  | 1.29309   |
| Se037 | COQ10B L10F   | HLA-C*12:02 | MT | MAARTGHTA[F]  | 45.74  | WT | MAARTGHTA[L]  | 50.64    | 10 | 14.41155  |
| Se037 | CCR1 I246V    | HLA-A*24:02 | MT | VIM[V]IFFLF   | 189.68 | WT | VIM[I]IFFLF   | 273.23   | 9  | 6.60995   |
| Se037 | CCR1 I246V    | HLA-C*12:02 | MT | FVIM[V]IFFLF  | 424.2  | WT | FVIM[I]IFFLF  | 585.96   | 9  | 6.60995   |
| Se037 | ZGRF1 I1814T  | HLA-C*12:02 | MT | Q[I]TEPASLL   | 404.37 | WT | Q[I]TEPASLL   | 1085.98  | 9  | 1.34235   |
| Se037 | PRKAA1 G203V  | HLA-A*24:02 | MT | LYA[V]PEVDIW  | 232.47 | WT | LYA[G]PEVDIW  | 235.65   | 10 | 11.66338  |
| Se037 | AP3B1 G832A   | HLA-A*24:02 | MT | K[A]LAAHYFF   | 63.68  | WT | K[G]LAAHYFF   | 94.14    | 9  | 10.166    |

|       |               |              |    |               |        |    |               |         |    |          |
|-------|---------------|--------------|----|---------------|--------|----|---------------|---------|----|----------|
| Se037 | LARS V750A    | HLA-B*40:02  | MT | [A]EDANFVEAM  | 80.04  | WT | [V]EDANFVEAM  | 179.49  | 10 | 14.83979 |
| Se037 | LARS V750A    | HLA-B*40:02  | MT | [A]EDANFVEA   | 204.31 | WT | [V]EDANFVEA   | 401.79  | 9  | 14.83979 |
| Se037 | VARS2 W485S   | HLA-C*12:02  | MT | F[S]VGRMVML   | 44.39  | WT | F[W]VGRMVML   | 1527.73 | 9  | 6.30148  |
| Se037 | VARS2 W485S   | HLA-C*12:02  | MT | LLF[S]VGRMVVM | 281.41 | WT | LLF[W]VGRMVVM | 648.53  | 10 | 6.30148  |
| Se037 | COL12A1 A223T | HLA-B*40:02  | MT | LE[T]PSNLVI   | 135.04 | WT | LE[A]PSNLVI   | 93.4    | 9  | 21.66438 |
| Se037 | MTPN E49G     | HLA-C*12:02  | MT | YAADCGQL[G]I  | 45.03  | WT | YAADCGQL[E]I  | 23.35   | 10 | 48.93065 |
| Se037 | MTPN E49G     | HLA-B*40:02  | MT | GQL[G]ILEFLL  | 148.9  | WT | GQL[E]ILEFLL  | 130.93  | 10 | 48.93065 |
| Se037 | MTPN E49G     | HLA-B*40:02  | MT | GQL[G]ILEFL   | 198.15 | WT | GQL[E]ILEFL   | 152.13  | 9  | 48.93065 |
| Se037 | RGS22 G92V    | HLA-B*40:02  | MT | [V]EEEEVSYSL  | 146.17 | WT | [G]EEEEVSYSL  | 75.68   | 10 | 1.0824   |
| Se037 | FOCAD D58E    | HLA-B*40:02  | MT | WEKCCS[E]NVV  | 71.45  | WT | WEKCCS[D]NVV  | 88.8    | 10 | 4.21772  |
| Se037 | FOCAD D58E    | HLA-B*40:02  | MT | WEKCCS[E]NV   | 119.12 | WT | WEKCCS[D]NV   | 140.84  | 9  | 4.21772  |
| Se037 | FOCAD D58E    | HLA-B*40:02  | MT | S[E]NVVVRTA   | 281.38 | WT | S[D]NVVVRTA   | 7468.83 | 9  | 4.21772  |
| Se037 | ZEB1 R197S    | HLA-C*12:02  | MT | FAYRTQLE[S]H  | 435.12 | WT | FAYRTQLE[R]H  | 1113.41 | 10 | 8.12103  |
| Se037 | C11orf80 C57F | HLA-B*40:02  | MT | TD[F]LVIKHFL  | 309.45 | WT | TD[C]LVIKHFL  | 2482.95 | 10 | 8.45053  |
| Se037 | CPT1A L174P   | HLA-C*12:02  | MT | FQTSLPR[L]PV  | 364.83 | WT | FQTSLPR[L]PV  | 235.65  | 10 | 13.32134 |
| Se037 | ZW10 T93A     | HLA-B*40:02  | MT | GEF[A]DLKQQL  | 35.38  | WT | GEF[T]DLKQQL  | 56.76   | 10 | 6.21374  |
| Se037 | SNX19 V61M    | HLA-C*12:02  | MT | MV[M]SAIVDTL  | 76.58  | WT | MV[V]SAIVDTL  | 168.88  | 10 | 14.88094 |
| Se037 | NTM E184K     | HLA-C*12:02  | MT | FVSED[K]YLEI  | 175.82 | WT | FVSED[E]YLEI  | 246.99  | 10 | 3.08437  |
| Se037 | CLECB2 S88R   | HLA-A*24:02  | MT | RYKC[R]SDHWI  | 207.19 | WT | RYKC[S]SDHWI  | 178.45  | 10 | 10.96512 |
| Se037 | UBFD1 V163I   | HLA-C*12:02  | MT | STINDVLA[I]   | 140.37 | WT | STINDVLA[V]   | 54.88   | 9  | 14.62301 |
| Se037 | CAMKK1 L281V  | HLA-B*40:02  | MT | RDIKPSN[V]L   | 158.64 | WT | RDIKPSN[L]L   | 252.58  | 9  | 1.45494  |
| Se037 | CAMKK1 L281V  | HLA-B*40:02  | MT | RDIKPSN[V]LL  | 206.27 | WT | RDIKPSN[L]LL  | 260.45  | 10 | 1.45494  |
| Se037 | DPY19L3 A696P | HLA-C*12:02  | MT | YV[P]YFTRVF   | 89.59  | WT | YV[A]YFTRVF   | 24.87   | 9  | 5.10053  |
| Se037 | DPY19L3 A696P | HLA-A*24:02  | MT | PYV[P]YFTRVF  | 250.8  | WT | PYV[A]YFTRVF  | 266.24  | 10 | 5.10053  |
| Se037 | DPY19L3 A696P | HLA-A*24:02  | MT | NLPPYV[P]YF   | 266.42 | WT | NLPPYV[A]YF   | 328.2   | 9  | 5.10053  |
| Se037 | DPY19L3 A696P | HLA-A*24:02  | MT | RNLPPYV[P]YF  | 480.51 | WT | RNLPPYV[A]YF  | 395.06  | 10 | 5.10053  |
| Se037 | SYNE4 V202F   | HLA-A*24:02  | MT | LWQLQAQL[F]   | 91.66  | WT | LWQLQAQL[V]   | 3817.6  | 9  | 5.70288  |
| Se037 | SYNE4 V202F   | HLA-C*12:02  | MT | [F]YSYLVFEEA  | 108.3  | WT | [V]YSYLVFEEA  | 1770.9  | 10 | 5.70288  |
| Se037 | SYNE4 V202F   | HLA-B*40:02  | MT | LQAQL[F]YSYL  | 138.25 | WT | LQAQL[V]YSYL  | 203.42  | 10 | 5.70288  |
| Se037 | SYNE4 V202F   | HLA-B*40:02  | MT | AQL[F]YSYLVF  | 145.36 | WT | AQL[V]YSYLVF  | 131.04  | 10 | 5.70288  |
| Se037 | SYNE4 V202F   | HLA-A*24:02  | MT | RLWQLQAQL[F]  | 403.32 | WT | RLWQLQAQL[V]  | 9537.69 | 10 | 5.70288  |
| Se037 | SYNE4 V202F   | HLA-B*40:02  | MT | AQL[F]YSYLV   | 499.47 | WT | AQL[V]YSYLV   | 423.7   | 9  | 5.70288  |
| Se037 | SIRPB1 P2S    | HLA-C*12:02  | MT | M[S]VPASWPHL  | 258.42 | WT | M[P]VPASWPHL  | 3031.05 | 10 | 1.09086  |
| Se037 | DNTTIP1 S191C | HLA-A*24:02  | MT | VWPKP[C]CEPI  | 465.29 | WT | VWPKP[S]CEPI  | 797.36  | 10 | 11.29775 |
| Se037 | PCDH19 S96I   | HLA-B*40:02  | MT | RQ[I]PKCHSL   | 67.14  | WT | RQ[S]PKCHSL   | 248.18  | 10 | 2.6865   |
| Se039 | TCEB3 Q156L   | HLA-C*07:02  | MT | HR[L]KKHRKL   | 203.66 | WT | HR[Q]KKHRKL   | 317.33  | 9  | 12.24794 |
| Se039 | FUCA1 T459S   | HLA-B*40:02  | MT | AEFAW[S]IKL   | 6.92   | WT | AEFAW[T]IKL   | 8.24    | 9  | 42.23565 |
| Se039 | FUCA1 T459S   | HLA-A*02:06  | MT | FAW[S]IKLTGV  | 13.55  | WT | FAW[T]IKLTGV  | 18.89   | 10 | 42.23565 |
| Se039 | FUCA1 T459S   | HLA-A*02:197 | MT | FAW[S]IKLTGV  | 32.66  | WT | FAW[T]IKLTGV  | 51.18   | 10 | 42.23565 |
| Se039 | FUCA1 T459S   | HLA-A*02:06  | MT | AVPAEFAW[S]I  | 66.39  | WT | AVPAEFAW[T]I  | 81.74   | 10 | 42.23565 |
| Se039 | FUCA1 T459S   | HLA-B*40:02  | MT | AEFAW[S]IKLT  | 72.14  | WT | AEFAW[T]IKLT  | 94.69   | 10 | 42.23565 |
| Se039 | FUCA1 T459S   | HLA-A*02:197 | MT | AVPAEFAW[S]I  | 476.62 | WT | AVPAEFAW[T]I  | 497.03  | 10 | 42.23565 |
| Se039 | FUCA1 Y335C   | HLA-A*02:197 | MT | SLGGN[Y]LLNI  | 292.31 | WT | SLGGN[Y]LLNI  | 173.99  | 10 | 42.23565 |
| Se039 | MSTO1 Y278C   | HLA-B*40:02  | MT | GEAQRNI[C]JRL | 94.82  | WT | GEAQRNI[Y]JRL | 51.88   | 10 | 10.71947 |
| Se039 | MSTO1 Y278C   | HLA-B*40:02  | MT | AQRNI[C]JRL   | 497.22 | WT | AQRNI[Y]JRL   | 238.11  | 9  | 10.71947 |
| Se039 | UHMK1 E275G   | HLA-B*40:02  | MT | [G]ECQKYGPVV  | 57.32  | WT | [E]ECQKYGPVV  | 526.64  | 10 | 15.21238 |
| Se039 | UHMK1 E275G   | HLA-B*40:02  | MT | [G]ECQKYGPV   | 96.47  | WT | [E]ECQKYGPV   | 1256.14 | 9  | 15.21238 |
| Se039 | DDX59 L210V   | HLA-B*40:02  | MT | FEHCS[V]PEVL  | 16.33  | WT | FEHCS[L]PEVL  | 18.61   | 10 | 11.65405 |
| Se039 | DDX59 L210V   | HLA-B*40:02  | MT | FEHCS[V]PEV   | 35.09  | WT | FEHCS[L]PEV   | 41.73   | 9  | 11.65405 |
| Se039 | DDX59 L210V   | HLA-A*02:06  | MT | IIDFEHCS[V]   | 122.53 | WT | IIDFEHCS[L]   | 1002.96 | 9  | 11.65405 |
| Se039 | DDX59 L210V   | HLA-A*02:06  | MT | S[V]PEVLNHNL  | 140.28 | WT | S[L]PEVLNHNL  | 39.89   | 10 | 11.65405 |
| Se039 | DDX59 L210V   | HLA-A*02:197 | MT | IIDFEHCS[V]   | 169.88 | WT | IIDFEHCS[L]   | 1371.84 | 9  | 11.65405 |
| Se039 | DDX59 L210V   | HLA-A*02:06  | MT | FEHCS[V]PEV   | 480.67 | WT | FEHCS[L]PEV   | 237.02  | 9  | 11.65405 |
| Se039 | MEIS1 D200N   | HLA-B*40:02  | MT | SE[N]ITRSANL  | 160.47 | WT | SE[D]ITRSANL  | 496.59  | 10 | 52.0724  |
| Se039 | ZAK E288Q     | HLA-B*40:02  | MT | AEWRCEI[Q]AT  | 41.53  | WT | AEWRCEI[E]AT  | 65.33   | 10 | 4.98881  |
| Se039 | ZAK E288Q     | HLA-B*40:02  | MT | AEWRCEI[Q]A   | 54.57  | WT | AEWRCEI[E]A   | 44.3    | 9  | 4.98881  |
| Se039 | ZAK E288Q     | HLA-B*40:02  | MT | CEI[Q]ATLERL  | 74.48  | WT | CEI[E]ATLERL  | 60.55   | 10 | 4.98881  |
| Se039 | ZAK E288Q     | HLA-C*07:02  | MT | WRCEI[Q]ATL   | 449.16 | WT | WRCEI[E]ATL   | 1545.9  | 9  | 4.98881  |
| Se039 | CHPF R91G     | HLA-A*02:197 | MT | LLS[G]MLLQQL  | 229.77 | WT | LLS[R]MLLQQL  | 53.96   | 10 | 22.87797 |
| Se039 | CHPF R91G     | HLA-A*02:06  | MT | LLS[G]MLLQQL  | 112.03 | WT | LLS[R]MLLQQL  | 237.56  | 10 | 22.87797 |
| Se039 | ZMYND10 I103M | HLA-A*02:06  | MT | NTFP[M]YMVV   | 52.67  | WT | NTFP[I]YMVV   | 26.92   | 9  | 6.94686  |
| Se039 | ZMYND10 I103M | HLA-B*55:02  | MT | FP[M]YMVVHH   | 323.97 | WT | FP[I]YMVVHH   | 1181.72 | 9  | 6.94686  |
| Se039 | ZMYND10 I103M | HLA-C*07:02  | MT | FKPQNTFP[I]   | 334.59 | WT | FKPQNTFP[I]   | 781.71  | 9  | 6.94686  |
| Se039 | GRAMD1C L446V | HLA-A*02:197 | MT | IMLQKTFDL[V]  | 19.06  | WT | IMLQKTFDL[L]  | 65.61   | 10 | 1.14194  |
| Se039 | GRAMD1C L446V | HLA-A*02:06  | MT | IMLQKTFDL[V]  | 24.98  | WT | IMLQKTFDL[L]  | 112.77  | 10 | 1.14194  |
| Se039 | GRAMD1C L446V | HLA-A*02:197 | MT | MLQKTFDL[V]   | 25.86  | WT | MLQKTFDL[L]   | 146.74  | 9  | 1.14194  |
| Se039 | GRAMD1C L446V | HLA-A*02:06  | MT | MLQKTFDL[V]   | 37     | WT | MLQKTFDL[L]   | 315.8   | 9  | 1.14194  |
| Se039 | IGSF10 T1800M | HLA-A*02:197 | MT | V[M]VDGTLVL   | 30.74  | WT | V[T]VDGTLVL   | 3287.52 | 9  | 1.78969  |
| Se039 | IGSF10 T1800M | HLA-A*02:06  | MT | V[M]VDGTLVL   | 46.01  | WT | V[T]VDGTLVL   | 316.64  | 9  | 1.78969  |
| Se039 | IGSF10 T1800M | HLA-A*02:06  | MT | VV[M]VDGTLV   | 75.48  | WT | VV[T]VDGTLV   | 1264.08 | 9  | 1.78969  |
| Se039 | IGSF10 T1800M | HLA-A*02:06  | MT | AVV[M]VDGTLV  | 298.64 | WT | AVV[T]VDGTLV  | 312.49  | 10 | 1.78969  |
| Se039 | IGSF10 T1800M | HLA-A*02:197 | MT | VV[M]VDGTLV   | 455.93 | WT | VV[T]VDGTLV   | 7043.97 | 9  | 1.78969  |
| Se039 | SMC4 Q340H    | HLA-B*40:02  | MT | AEMET[H]KEKI  | 52.92  | WT | AEMET[Q]KEKI  | 76.84   | 10 | 10.97417 |
| Se039 | SMC4 K963E    | HLA-B*40:02  | MT | AEL[E]SLEDKA  | 458.65 | WT | AEL[K]SLEDKA  | 502.4   | 10 | 10.97417 |
| Se039 | HNRNPDL A39V  | HLA-A*02:197 | MT | QL[V]PLLPSL   | 20.58  | WT | QL[A]PLLPSL   | 9.57    | 9  | 54.28938 |
| Se039 | HNRNPDL A39V  | HLA-A*02:06  | MT | QL[V]PLLPSL   | 26.84  | WT | QL[A]PLLPSL   | 14.03   | 9  | 54.28938 |
| Se039 | HNRNPDL A39V  | HLA-B*40:02  | MT | RQL[V]PLLPSL  | 36.34  | WT | RQL[A]PLLPSL  | 30.31   | 10 | 54.28938 |
| Se039 | HNRNPDL A39V  | HLA-A*02:06  | MT | RQL[V]PLLPSL  | 39.58  | WT | RQL[A]PLLPSL  | 14.72   | 10 | 54.28938 |



|       |                |              |    |               |        |    |               |          |    |           |
|-------|----------------|--------------|----|---------------|--------|----|---------------|----------|----|-----------|
| Se039 | HNRNPDL A39V   | HLA-C*07:02  | MT | WRPRPPRQL[V]  | 279.58 | WT | WRPRPPRQL[A]  | 2413.54  | 10 | 54.28938  |
| Se039 | HNRNPDL A39V   | HLA-A*02:06  | MT | QL[V]PLLPPLA  | 281.68 | WT | QL[A]PLLPPLA  | 165.34   | 10 | 54.28938  |
| Se039 | HNRNPDL A39V   | HLA-A*02:197 | MT | QL[V]PLLPPLA  | 350.68 | WT | QL[A]PLLPPLA  | 124.75   | 10 | 54.28938  |
| Se039 | HNRNPDL A39V   | HLA-A*02:197 | MT | RQL[V]PLLPPL  | 444.93 | WT | RQL[A]PLLPPL  | 120.28   | 10 | 54.28938  |
| Se039 | SCD5 Q203E     | HLA-A*02:197 | MT | ALN[E]EAACEM  | 193.17 | WT | ALN[Q]EAACEM  | 1110.41  | 10 | 9.69357   |
| Se039 | SCD5 Q203E     | HLA-A*02:06  | MT | ALN[E]EAACEM  | 358.43 | WT | ALN[Q]EAACEM  | 1643.48  | 10 | 9.69357   |
| Se039 | SCD5 Q203E     | HLA-B*40:02  | MT | N[E]EAACEM    | 429.74 | WT | N[Q]EAACEM    | 3973.44  | 9  | 9.69357   |
| Se039 | PPP3CA K382N   | HLA-B*40:02  | MT | SESVLTL[N]JGL | 67.11  | WT | SESVLTL[K]JGL | 101.27   | 10 | 9.79964   |
| Se039 | PPP3CA K382N   | HLA-A*02:06  | MT | LTL[N]GLTPT   | 244.85 | WT | LTL[K]GLTPT   | 376.3    | 9  | 9.79964   |
| Se039 | LRBA V2630L    | HLA-A*02:06  | MT | VVFGHWDV[L]   | 320.63 | WT | VVFGHWDV[V]   | 32.01    | 9  | 7.229     |
| Se039 | DDX60L M239I   | HLA-B*40:02  | MT | FEHLKWNMD[I]  | 98.79  | WT | FEHLKWNMD[M]  | 95.28    | 10 | 1.27523   |
| Se039 | DDX60L M239I   | HLA-B*40:02  | MT | [I]JEEAYQTLFL | 149.26 | WT | [M]JEEAYQTLFL | 66.2     | 10 | 1.27523   |
| Se039 | DDX60L M239I   | HLA-A*02:06  | MT | M[I]JEEAYQTL  | 466.49 | WT | M[M]JEEAYQTL  | 74.64    | 9  | 1.27523   |
| Se039 | TRIO V1589I    | HLA-B*40:02  | MT | RE[I]IQERTI   | 61.63  | WT | RE[V]IQERTI   | 107.42   | 9  | 9.7547    |
| Se039 | TRIO V1589I    | HLA-A*02:06  | MT | [I]IQERTIHL   | 401.38 | WT | [V]IQERTIHL   | 596.24   | 9  | 9.7547    |
| Se039 | TRIO V1589I    | HLA-A*02:197 | MT | [I]IQERTIHL   | 482.68 | WT | [V]IQERTIHL   | 716.21   | 9  | 9.7547    |
| Se039 | LMBRD1 Y495C   | HLA-A*02:06  | MT | AAV[C]FGNWA   | 330.04 | WT | AAV[Y]FGNWA   | 441.26   | 9  | 55.07611  |
| Se039 | LMBRD1 Y495C   | HLA-A*02:06  | MT | Y[C]FGNWAFL   | 363.57 | WT | Y[Y]FGNWAFL   | 101.03   | 9  | 55.07611  |
| Se039 | PHIP E356D     | HLA-A*02:06  | MT | GQP[D]KISEL   | 419.21 | WT | GQP[E]KISEL   | 342.08   | 9  | 12.66137  |
| Se039 | FAM71F2 V85M   | HLA-A*02:06  | MT | S[M]PSLPLPNV  | 22.3   | WT | S[V]PSLPLPNV  | 51.58    | 10 | 1.05924   |
| Se039 | FAM71F2 V85M   | HLA-A*02:197 | MT | S[M]PSLPLPNV  | 22.59  | WT | S[V]PSLPLPNV  | 353.13   | 10 | 1.05924   |
| Se039 | FAM71F2 V85M   | HLA-B*55:02  | MT | [M]PSLPLPNV   | 62.77  | WT | [V]PSLPLPNV   | 1301.6   | 9  | 1.05924   |
| Se039 | FAM71F2 V85M   | HLA-B*55:02  | MT | [M]PSLPLPNVL  | 379.84 | WT | [V]PSLPLPNVL  | 4907.49  | 10 | 1.05924   |
| Se039 | FLNC P1411S    | HLA-B*40:02  | MT | VEY[I]SFTPG   | 293.69 | WT | VEY[P]SFTPG   | 397.63   | 9  | 1.13288   |
| Se039 | FLNC P1411S    | HLA-A*02:06  | MT | CTVEY[I]SFT   | 354.34 | WT | CTVEY[P]SFT   | 136.7    | 9  | 1.13288   |
| Se039 | ZNF862 V308A   | HLA-B*40:02  | MT | [A]JESCIQDPSA | 124.28 | WT | [V]JESCIQDPSA | 342.84   | 10 | 1.95154   |
| Se039 | VPS13B Q3975R  | HLA-A*02:06  | MT | SSM[R]IPCPV   | 43.8   | WT | SSM[Q]IPCPV   | 42.47    | 9  | 1.93703   |
| Se039 | VPS13B Q3975R  | HLA-A*02:06  | MT | SSM[R]IPCPVV  | 178    | WT | SSM[Q]IPCPVV  | 167.84   | 10 | 1.93703   |
| Se039 | VPS13B Q3975R  | HLA-A*02:197 | MT | SSM[R]IPCPV   | 396.23 | WT | SSM[Q]IPCPV   | 392.7    | 9  | 1.93703   |
| Se039 | RAD21 L14P     | HLA-A*02:06  | MT | FVLSKRGP[P]A  | 62.58  | WT | FVLSKRGP[L]A  | 185.9    | 10 | 84.98553  |
| Se039 | RAD21 L14P     | HLA-A*02:197 | MT | FVLSKRGP[P]A  | 365.48 | WT | FVLSKRGP[L]A  | 907.66   | 10 | 84.98553  |
| Se039 | RPL8 T111S     | HLA-A*02:06  | MT | GTMPEG[S]IV   | 455.85 | WT | GTMPEG[T]IV   | 303.67   | 9  | 1280.1931 |
| Se039 | NPR2 Y663C     | HLA-A*02:06  | MT | FVLKITD[C]JGL | 42.57  | WT | FVLKITD[Y]JGL | 14.27    | 10 | 2.88761   |
| Se039 | NPR2 Y663C     | HLA-A*02:197 | MT | FVLKITD[C]JGL | 148.76 | WT | FVLKITD[Y]JGL | 34       | 10 | 2.88761   |
| Se039 | FKBP15 V281G   | HLA-A*02:06  | MT | SIL[G]FEVEV   | 16.88  | WT | SIL[V]FEVEV   | 43.3     | 9  | 7.96831   |
| Se039 | FKBP15 V281G   | HLA-A*02:197 | MT | SIL[G]FEVEV   | 21.45  | WT | SIL[V]FEVEV   | 59.78    | 9  | 7.96831   |
| Se039 | FKBP15 V281G   | HLA-A*02:06  | MT | ATDSIL[G]FEV  | 50.39  | WT | ATDSIL[V]FEV  | 17.61    | 10 | 7.96831   |
| Se039 | FKBP15 V281G   | HLA-A*02:197 | MT | ATDSIL[G]FEV  | 192.03 | WT | ATDSIL[V]FEV  | 40.28    | 10 | 7.96831   |
| Se039 | DIP2C G187E    | HLA-B*40:02  | MT | S[E]AAHRLADV  | 195.99 | WT | S[G]AAHRLADV  | 26336.19 | 10 | 4.47343   |
| Se039 | KIAA1217 H126Y | HLA-C*07:02  | MT | S[Y]SPQPPSL   | 116.62 | WT | S[H]SPQPPSL   | 3763.26  | 9  | 15.79152  |
| Se039 | AFAP1L2 I113M  | HLA-B*40:02  | MT | GQ[I]SGAQSF   | 99.74  | WT | GQ[I]SGAQSF   | 263.37   | 9  | 54.57562  |
| Se039 | AFAP1L2 I113M  | HLA-A*02:06  | MT | GQ[I]SGAQSF   | 144.83 | WT | GQ[I]SGAQSF   | 380.18   | 9  | 54.57562  |
| Se039 | AFAP1L2 I113M  | HLA-A*02:06  | MT | LTLGQ[I]SGA   | 398.63 | WT | LTLGQ[I]SGA   | 412.16   | 9  | 54.57562  |
| Se039 | CYP2E1 Q148K   | HLA-C*07:02  | MT | SRI[K]REAHFL  | 223.08 | WT | SRI[Q]REAHFL  | 174.48   | 10 | 2.1025    |
| Se039 | NAALADL1 F431Y | HLA-C*07:02  | MT | F[Y]NKLQERTV  | 225.78 | WT | F[F]NKLQERTV  | 1585.69  | 10 | 1.3301    |
| Se039 | RBM14 S612C    | HLA-B*40:02  | MT | AEL[C]DYRRL   | 130.43 | WT | AEL[S]DYRRL   | 181.78   | 9  | 8.57162   |
| Se039 | PITPNM1 T777M  | HLA-A*02:06  | MT | LQ[M]HSSLFL   | 11.16  | WT | LQ[T]HSSLFL   | 131.63   | 9  | 31.31698  |
| Se039 | PITPNM1 T777M  | HLA-A*02:197 | MT | LQ[M]HSSLFL   | 47.75  | WT | LQ[T]HSSLFL   | 1242.56  | 9  | 31.31698  |
| Se039 | PITPNM1 T777M  | HLA-A*02:197 | MT | LLLADTLQ[M]   | 86.6   | WT | LLLADTLQ[T]   | 275.36   | 9  | 31.31698  |
| Se039 | PITPNM1 T777M  | HLA-A*02:197 | MT | TLQ[M]HSSLFL  | 175.67 | WT | TLQ[T]HSSLFL  | 166.89   | 10 | 31.31698  |
| Se039 | PITPNM1 T777M  | HLA-B*40:02  | MT | LQ[M]HSSLFL   | 182.3  | WT | LQ[T]HSSLFL   | 983.38   | 9  | 31.31698  |
| Se039 | PITPNM1 T777M  | HLA-A*02:06  | MT | LLLADTLQ[M]   | 218.75 | WT | LLLADTLQ[T]   | 607.11   | 9  | 31.31698  |
| Se039 | TMEM126B W140C | HLA-A*02:06  | MT | RVLIH[C]MTL   | 181.44 | WT | RVLIH[W]MTL   | 76.18    | 9  | 18.04574  |
| Se039 | TMEM126B W140C | HLA-A*02:197 | MT | RVLIH[C]MTL   | 467.33 | WT | RVLIH[W]MTL   | 419.09   | 9  | 18.04574  |
| Se039 | ZBTB44 E301K   | HLA-B*40:02  | MT | [K]JEVSQPVSA  | 165.83 | WT | [E]JEVSQPVSA  | 2753.15  | 9  | 3.01567   |
| Se039 | ITGA5 G845S    | HLA-A*02:06  | MT | AQAQVTLN[S]V  | 16.53  | WT | AQAQVTLN[G]V  | 16.73    | 10 | 9.10586   |
| Se039 | ITGA5 G845S    | HLA-A*02:197 | MT | AQAQVTLN[S]V  | 129.78 | WT | AQAQVTLN[G]V  | 165.74   | 10 | 9.10586   |
| Se039 | GLS2 V8F       | HLA-A*02:06  | MT | MVNAGAI[F]V   | 9.59   | WT | MVNAGAI[V]V   | 58.74    | 9  | 4.17335   |
| Se039 | GLS2 V8F       | HLA-A*02:197 | MT | MVNAGAI[F]V   | 28.68  | WT | MVNAGAI[V]V   | 316.89   | 9  | 4.17335   |
| Se039 | MICU2 G46V     | HLA-A*02:06  | MT | AVAGAALA[V]   | 28.2   | WT | AVAGAALA[G]   | 12582.63 | 9  | 46.7764   |
| Se039 | MICU2 G46V     | HLA-A*02:06  | MT | AAVAGAALA[V]  | 110.78 | WT | AAVAGAALA[G]  | 21209.19 | 10 | 46.7764   |
| Se039 | MICU2 G46V     | HLA-A*02:06  | MT | AVAGAALA[V]A  | 164.16 | WT | AVAGAALA[G]A  | 60.93    | 10 | 46.7764   |
| Se039 | MICU2 G46V     | HLA-A*02:197 | MT | AVAGAALA[V]   | 273.54 | WT | AVAGAALA[G]   | 28817.49 | 9  | 46.7764   |
| Se039 | RNF6 C635F     | HLA-B*40:02  | MT | SELGKICSV[F]  | 64.69  | WT | SELGKICSV[C]  | 283.05   | 10 | 12.13428  |
| Se039 | RNF6 C635F     | HLA-A*02:06  | MT | CSV[F]ISDYV   | 112.07 | WT | CSV[C]ISDYV   | 112.02   | 9  | 12.13428  |
| Se039 | FAM63B N181Y   | HLA-A*02:06  | MT | FS[Y]LHSPSS   | 149.23 | WT | FS[N]LHSPSS   | 1134.54  | 9  | 1.34394   |
| Se039 | FAM63B N181Y   | HLA-B*40:02  | MT | LESFS[Y]LHSF  | 149.54 | WT | LESFS[N]LHSF  | 186.15   | 10 | 1.34394   |
| Se039 | FAM63B N181Y   | HLA-A*02:197 | MT | [Y]LHSPSS     | 468.66 | WT | [N]LHSPSS     | 9214.54  | 9  | 1.34394   |
| Se039 | POLG G114R     | HLA-A*02:197 | MT | GLW[R]QPAVPL  | 44.22  | WT | GLW[G]QPAVPL  | 19.94    | 10 | 11.13857  |
| Se039 | POLG G114R     | HLA-A*02:06  | MT | GLW[R]QPAVPL  | 217.72 | WT | GLW[G]QPAVPL  | 77.39    | 10 | 11.13857  |
| Se039 | POLG G114R     | HLA-A*02:06  | MT | [R]QPAVPLPDV  | 245.79 | WT | [G]QPAVPLPDV  | 444.74   | 10 | 11.13857  |
| Se039 | MAN2A2 P139A   | HLA-A*02:06  | MT | [L]AFDNDGGV   | 123.98 | WT | [P]AFDNDGGV   | 7115.75  | 10 | 16.17682  |
| Se039 | MAN2A2 P139A   | HLA-B*40:02  | MT | SEEL[A]FDNV   | 293.5  | WT | SEEL[P]FDNV   | 489.37   | 9  | 16.17682  |
| Se039 | ATP6V0C A27P   | HLA-A*02:06  | MT | MVFS[P]LGAA   | 25.09  | WT | MVFS[A]LGAA   | 18.46    | 9  | 97.02169  |
| Se039 | ATP6V0C A27P   | HLA-A*02:06  | MT | SAAMVFS[P]L   | 102.48 | WT | SAAMVFS[A]L   | 269.17   | 9  | 97.02169  |
| Se039 | ATP6V0C A27P   | HLA-A*02:06  | MT | ASAAMVFS[P]L  | 147.04 | WT | ASAAMVFS[A]L  | 270.63   | 10 | 97.02169  |
| Se039 | ATP6V0C A27P   | HLA-A*02:06  | MT | AAMVFS[P]LGA  | 174.56 | WT | AAMVFS[A]LGA  | 132.53   | 10 | 97.02169  |
| Se039 | ATP6V0C A27P   | HLA-B*55:02  | MT | MVFS[P]LGAA   | 191.04 | WT | MVFS[A]LGAA   | 259.24   | 9  | 97.02169  |

|       |                 |              |    |               |        |    |               |          |    |          |
|-------|-----------------|--------------|----|---------------|--------|----|---------------|----------|----|----------|
| Se039 | ATP6V0C A27P    | HLA-A*02:06  | MT | AMVFS[P]LGAA  | 246.2  | WT | AMVFS[A]LGAA  | 197.91   | 10 | 97.02169 |
| Se039 | ATP6V0C A27P    | HLA-A*02:197 | MT | MVFS[P]LGAA   | 283.01 | WT | MVFS[A]LGAA   | 159.29   | 9  | 97.02169 |
| Se039 | ATP6V0C A27P    | HLA-A*02:06  | MT | AMVFS[P]LGA   | 337.15 | WT | AMVFS[A]LGA   | 283.87   | 9  | 97.02169 |
| Se039 | ATP6V0C A27P    | HLA-A*02:197 | MT | AMVFS[P]LGA   | 373.6  | WT | AMVFS[A]LGA   | 491.49   | 9  | 97.02169 |
| Se039 | ATP6V0C A27P    | HLA-B*55:02  | MT | S[P]LGAAAYGTA | 431.83 | WT | S[A]LGAAAYGTA | 7212.98  | 10 | 97.02169 |
| Se039 | ATP6V0C A27P    | HLA-A*02:197 | MT | AMVFS[P]LGAA  | 468.34 | WT | AMVFS[A]LGAA  | 391.89   | 10 | 97.02169 |
| Se039 | KIAA0100 R1075T | HLA-B*55:02  | MT | LPWGNVAVE[T]  | 138.12 | WT | LPWGNVAVE[R]  | 1398.48  | 10 | 28.77764 |
| Se039 | KIAA0100 R1075T | HLA-A*02:06  | MT | VAVE[T]NMPPL  | 294.48 | WT | VAVE[R]NMPPL  | 313.64   | 10 | 28.77764 |
| Se039 | SEC14L1 G215V   | HLA-A*02:06  | MT | YL[V]DLTPLQ   | 329.32 | WT | YL[G]DLTPLQ   | 820.82   | 9  | 18.79949 |
| Se039 | SEC14L1 G215V   | HLA-A*02:197 | MT | YL[V]DLTPLQ   | 395.75 | WT | YL[G]DLTPLQ   | 689.71   | 9  | 18.79949 |
| Se039 | SEC14L1 G215V   | HLA-C*07:02  | MT | KRYL[V]DLTPL  | 466.47 | WT | KRYL[G]DLTPL  | 384.01   | 10 | 18.79949 |
| Se039 | MOCOS R183L     | HLA-A*02:06  | MT | WSAEE[L]SASA  | 446.19 | WT | WSAEE[R]SASA  | 2474.39  | 10 | 3.73592  |
| Se039 | ZNF407 D183H    | HLA-A*02:06  | MT | CTIGNV[H]TV   | 19.89  | WT | CTIGNV[D]TV   | 42.58    | 9  | 1.94911  |
| Se039 | ZNF407 D183H    | HLA-A*02:197 | MT | CTIGNV[H]TV   | 147.32 | WT | CTIGNV[D]TV   | 426.05   | 9  | 1.94911  |
| Se039 | ZNF407 D183H    | HLA-A*02:06  | MT | CTIGNV[H]TVL  | 438.12 | WT | CTIGNV[D]TVL  | 808.46   | 10 | 1.94911  |
| Se039 | ADNP2 A114P     | HLA-A*02:06  | MT | CVF[P]SQPKV   | 157.2  | WT | CVF[A]SQPKV   | 145.65   | 9  | 3.27042  |
| Se039 | THOP1 K286N     | HLA-A*02:197 | MT | NMA[N]TSQTV   | 83.06  | WT | NMA[K]TSQTV   | 143.86   | 9  | 12.26717 |
| Se039 | THOP1 K286N     | HLA-A*02:06  | MT | YVLEMNMA[N]T  | 100.72 | WT | YVLEMNMA[K]T  | 177.8    | 10 | 12.26717 |
| Se039 | THOP1 K286N     | HLA-A*02:06  | MT | NMA[N]TSQTV   | 160.51 | WT | NMA[K]TSQTV   | 256.46   | 9  | 12.26717 |
| Se039 | THOP1 K286N     | HLA-B*40:02  | MT | LEMNMA[N]TS   | 326.92 | WT | LEMNMA[K]TS   | 420.51   | 9  | 12.26717 |
| Se039 | CLPP C144Y      | HLA-A*02:197 | MT | ILNPI[Y]TWCV  | 6.26   | WT | ILNPI[C]TWCV  | 9.06     | 10 | 21.74163 |
| Se039 | CLPP C144Y      | HLA-A*02:06  | MT | ILNPI[Y]TWCV  | 11.53  | WT | ILNPI[C]TWCV  | 22.19    | 10 | 21.74163 |
| Se039 | CLPP C144Y      | HLA-A*02:06  | MT | [Y]TWCVQGAA   | 93.07  | WT | [C]TWCVQGAA   | 854.89   | 9  | 21.74163 |
| Se039 | CLPP C144Y      | HLA-A*02:06  | MT | MQYILNPI[Y]T  | 216.85 | WT | MQYILNPI[C]T  | 808.84   | 10 | 21.74163 |
| Se039 | TRIP10 Q175E    | HLA-B*40:02  | MT | Q[E]AHLRSHM   | 495.26 | WT | Q[Q]AHLRSHM   | 3821.65  | 9  | 30.67606 |
| Se039 | JAK3 T21M       | HLA-B*40:02  | MT | [M]EAGALHVL   | 13.64  | WT | [T]EAGALHVL   | 29.39    | 9  | 1.26021  |
| Se039 | JAK3 T21M       | HLA-B*40:02  | MT | [M]EAGALHVLL  | 15.41  | WT | [T]EAGALHVLL  | 38.93    | 10 | 1.26021  |
| Se039 | JAK3 T21M       | HLA-A*02:06  | MT | LS[M]EAGALHV  | 35.71  | WT | LS[T]EAGALHV  | 820.14   | 10 | 1.26021  |
| Se039 | JAK3 T21M       | HLA-A*02:197 | MT | SLLS[M]EAGA   | 183.15 | WT | SLLS[T]EAGA   | 385.34   | 9  | 1.26021  |
| Se039 | JAK3 T21M       | HLA-A*02:197 | MT | SLLS[M]EAGAL  | 271.47 | WT | SLLS[T]EAGAL  | 460.32   | 10 | 1.26021  |
| Se039 | JAK3 T21M       | HLA-A*02:197 | MT | S[M]EAGALHV   | 296.43 | WT | S[T]EAGALHV   | 11144.08 | 9  | 1.26021  |
| Se039 | JAK3 T21M       | HLA-A*02:06  | MT | S[M]EAGALHV   | 300.23 | WT | S[T]EAGALHV   | 1989.88  | 9  | 1.26021  |
| Se039 | JAK3 T21M       | HLA-A*02:197 | MT | S[M]EAGALHVL  | 346.57 | WT | S[T]EAGALHVL  | 10767.63 | 10 | 1.26021  |
| Se039 | JAK3 T21M       | HLA-A*02:06  | MT | SLLS[M]EAGA   | 465.29 | WT | SLLS[T]EAGA   | 835.85   | 9  | 1.26021  |
| Se039 | JAK3 T21M       | HLA-A*02:06  | MT | S[M]EAGALHVL  | 487.85 | WT | S[T]EAGALHVL  | 2140.44  | 10 | 1.26021  |
| Se039 | GPR4 L308M      | HLA-A*02:197 | MT | F[M]ASDKPQEM  | 57.53  | WT | F[L]ASDKPQEM  | 49.99    | 10 | 1.15845  |
| Se039 | GPR4 L308M      | HLA-A*02:06  | MT | F[M]ASDKPQEM  | 59.7   | WT | F[L]ASDKPQEM  | 65.08    | 10 | 1.15845  |
| Se039 | GPR4 L308M      | HLA-A*02:197 | MT | ALHNLLRF[M]A  | 276.28 | WT | ALHNLLRF[L]A  | 227.6    | 10 | 1.15845  |
| Se039 | GPR4 L308M      | HLA-A*02:06  | MT | ALHNLLRF[M]A  | 448.93 | WT | ALHNLLRF[L]A  | 356.08   | 10 | 1.15845  |
| Se039 | C20orf196 G9V   | HLA-A*02:06  | MT | MAARDATS[V]   | 279.68 | WT | MAARDATS[G]   | 30193.17 | 9  | 8.12748  |
| Se039 | UCKL1 1488N     | HLA-B*55:02  | MT | FPRVR[N]JITTA | 28.67  | WT | FPRVR[I]JITTA | 19.02    | 10 | 24.92705 |
| Se039 | UCKL1 1488N     | HLA-C*07:02  | MT | YAFPRVR[N]I   | 100.04 | WT | YAFPRVR[I]I   | 94.84    | 9  | 24.92705 |
| Se039 | UCKL1 1488N     | HLA-B*55:02  | MT | FPRVR[N]JITT  | 114.95 | WT | FPRVR[I]JITT  | 97.06    | 9  | 24.92705 |
| Se039 | CLIC6 L613V     | HLA-A*02:06  | MT | F[V]DGDELTLA  | 98.62  | WT | F[L]DGDELTLA  | 37.16    | 10 | 1.0497   |
| Se039 | CLIC6 L613V     | HLA-A*02:06  | MT | F[V]DGDELTL   | 168.05 | WT | F[L]DGDELTL   | 54.43    | 9  | 1.0497   |
| Se039 | CLIC6 L613V     | HLA-A*02:197 | MT | F[V]DGDELTLA  | 283.13 | WT | F[L]DGDELTLA  | 17.59    | 10 | 1.0497   |
| Se039 | CLIC6 L613V     | HLA-A*02:197 | MT | F[V]DGDELTL   | 303.17 | WT | F[L]DGDELTL   | 17.93    | 9  | 1.0497   |
| Se039 | PISD F318L      | HLA-A*02:06  | MT | GSYND[L]SFV   | 82.33  | WT | GSYND[F]SFV   | 44.27    | 9  | 18.70231 |
| Se039 | PISD F318L      | HLA-A*02:197 | MT | GSYND[L]SFV   | 411.98 | WT | GSYND[F]SFV   | 415.15   | 9  | 18.70231 |
| Se039 | APOL6 G246V     | HLA-A*02:06  | MT | GVMSAFSL[V]   | 5.79   | WT | GVMSAFSL[G]   | 4379.59  | 9  | 1.79589  |
| Se039 | APOL6 G246V     | HLA-A*02:197 | MT | GVMSAFSL[V]   | 22.13  | WT | GVMSAFSL[G]   | 17251.1  | 9  | 1.79589  |
| Se039 | APOL6 G246V     | HLA-A*02:197 | MT | SL[V]YDLATL   | 83.94  | WT | SL[G]YDLATL   | 196.29   | 9  | 1.79589  |
| Se039 | APOL6 G246V     | HLA-A*02:06  | MT | FSL[G]YDLATL  | 144    | WT | FSL[G]YDLATL  | 52.71    | 10 | 1.79589  |
| Se039 | APOL6 G246V     | HLA-A*02:06  | MT | SL[V]YDLATL   | 215.47 | WT | SL[G]YDLATL   | 982.65   | 9  | 1.79589  |
| Se039 | APOL6 G246V     | HLA-A*02:06  | MT | SAFSL[V]YDLA  | 320.7  | WT | SAFSL[G]YDLA  | 555      | 10 | 1.79589  |
| Se039 | SH3BP1 R312L    | HLA-A*02:197 | MT | F[L]LAAGASV   | 3.98   | WT | F[R]LAAGASV   | 7032.39  | 9  | 2.08365  |
| Se039 | SH3BP1 R312L    | HLA-A*02:06  | MT | F[L]LAAGASV   | 4.22   | WT | F[R]LAAGASV   | 2113.65  | 9  | 2.08365  |
| Se039 | SH3BP1 R312L    | HLA-A*02:197 | MT | F[L]LAAGASVL  | 11.51  | WT | F[R]LAAGASVL  | 12857.9  | 10 | 2.08365  |
| Se039 | SH3BP1 R312L    | HLA-A*02:06  | MT | F[L]LAAGASVL  | 27.44  | WT | F[R]LAAGASVL  | 4378.07  | 10 | 2.08365  |
| Se039 | SH3BP1 R312L    | HLA-A*02:197 | MT | GMKEEGLF[L]L  | 86.18  | WT | GMKEEGLF[R]L  | 173.17   | 10 | 2.08365  |
| Se039 | SH3BP1 R312L    | HLA-B*40:02  | MT | KEEGLF[L]LAA  | 102.36 | WT | KEEGLF[R]LAA  | 160.89   | 10 | 2.08365  |
| Se039 | SH3BP1 R312L    | HLA-A*02:197 | MT | [L]LAAGASVL   | 131.14 | WT | [R]LAAGASVL   | 430.98   | 9  | 2.08365  |
| Se039 | SH3BP1 R312L    | HLA-A*02:06  | MT | GMKEEGLF[L]L  | 140.56 | WT | GMKEEGLF[R]L  | 291.24   | 10 | 2.08365  |
| Se039 | SH3BP1 R312L    | HLA-A*02:197 | MT | GLF[R]LAAGA   | 155.9  | WT | GLF[R]LAAGA   | 187.27   | 9  | 2.08365  |
| Se039 | SH3BP1 R312L    | HLA-B*40:02  | MT | KEEGLF[L]LAA  | 183.63 | WT | KEEGLF[R]LAA  | 379.32   | 9  | 2.08365  |
| Se039 | SH3BP1 R312L    | HLA-B*40:02  | MT | EEGLF[R]LAA   | 334.99 | WT | EEGLF[R]LAA   | 438.69   | 9  | 2.08365  |
| Se039 | SH3BP1 R312L    | HLA-A*02:06  | MT | [L]LAAGASVL   | 452.4  | WT | [R]LAAGASVL   | 1062.04  | 9  | 2.08365  |
| Se039 | SH3BP1 R312L    | HLA-A*02:197 | MT | GMKEEGLF[L]   | 454.04 | WT | GMKEEGLF[R]   | 28427.6  | 9  | 2.08365  |
| Se039 | SH3BP1 R312L    | HLA-A*02:06  | MT | GLF[R]LAAGA   | 487.97 | WT | GLF[R]LAAGA   | 453.15   | 9  | 2.08365  |
| Se039 | ATRX T13R       | HLA-A*02:197 | MT | KLN[R]LVQKL   | 180.35 | WT | KLN[T]LVQKL   | 95.98    | 9  | 3.36435  |
| Se039 | ATRX T13R       | HLA-A*02:197 | MT | [R]LVQKLHDFL  | 189.76 | WT | [T]LVQKLHDFL  | 306      | 10 | 3.36435  |
| Se039 | ATRX T13R       | HLA-B*40:02  | MT | SESKLN[R]LV   | 194.84 | WT | SESKLN[T]LV   | 120.09   | 9  | 3.36435  |
| Se039 | ATRX T13R       | HLA-A*02:06  | MT | [R]LVQKLHDFL  | 311.45 | WT | [T]LVQKLHDFL  | 403.57   | 10 | 3.36435  |
| Se039 | OCRL H598N      | HLA-A*02:06  | MT | GQVPC[N]FSFI  | 24.88  | WT | GQVPC[H]FSFI  | 21.13    | 10 | 5.66417  |
| Se039 | OCRL H598N      | HLA-A*02:06  | MT | QVPC[N]FSFI   | 151.09 | WT | QVPC[H]FSFI   | 124.88   | 9  | 5.66417  |
| Se039 | OCRL H598N      | HLA-A*02:06  | MT | GQVPC[N]FSF   | 253.18 | WT | GQVPC[H]FSF   | 281      | 9  | 5.66417  |
| Se039 | OCRL H598N      | HLA-A*02:197 | MT | GQVPC[N]FSFI  | 330.44 | WT | GQVPC[H]FSFI  | 286.05   | 10 | 5.66417  |
| Se039 | OCRL H598N      | HLA-B*40:02  | MT | GQVPC[N]FSFI  | 421.93 | WT | GQVPC[H]FSFI  | 216.98   | 10 | 5.66417  |

|       |                |             |    |               |        |    |               |         |    |          |
|-------|----------------|-------------|----|---------------|--------|----|---------------|---------|----|----------|
| Se039 | OCRL H598N     | HLA-B*40:02 | MT | GQVPC[N]FSF   | 431.9  | WT | GQVPC[H]FSF   | 180.48  | 9  | 5.66417  |
| Se043 | PPARG N24D     | HLA-C*12:02 | MT | LSA[D]ISQEM   | 39     | WT | LSA[N]ISQEM   | 70.96   | 9  | 1.67578  |
| Se043 | RHOBTB3 L274V  | HLA-C*12:02 | MT | IV[V]CAVSHV   | 262.71 | WT | IV[L]CAVSHV   | 1308.29 | 9  | 5.1695   |
| Se043 | RHOBTB3 L274V  | HLA-C*12:02 | MT | IV[V]CAVSHVF  | 346.08 | WT | IV[L]CAVSHVF  | 1346.74 | 10 | 5.1695   |
| Se043 | DDHD2 V515L    | HLA-A*33:03 | MT | MFLT[L]RGLKR  | 26.2   | WT | MFLT[V]RGLKR  | 19.84   | 10 | 12.46178 |
| Se043 | DDHD2 V515L    | HLA-A*33:03 | MT | MFLT[L]RGLK   | 129.8  | WT | MFLT[V]RGLK   | 74.54   | 9  | 12.46178 |
| Se043 | DDHD2 V515L    | HLA-A*33:03 | MT | SPIGMFLT[L]R  | 211.69 | WT | SPIGMFLT[V]R  | 532.09  | 10 | 12.46178 |
| Se043 | DDHD2 V515L    | HLA-C*14:03 | MT | SPIGMFLT[L]   | 450.95 | WT | SPIGMFLT[V]   | 1188.71 | 9  | 12.46178 |
| Se043 | AGO2 S253F     | HLA-A*33:03 | MT | D[F]QRVKFTK   | 128.43 | WT | D[S]QRVKFTK   | 533.49  | 9  | 3.91025  |
| Se043 | AGO2 S253F     | HLA-A*33:03 | MT | QQKPLTD[F]QR  | 297.79 | WT | QQKPLTD[S]QR  | 759.96  | 10 | 3.91025  |
| Se043 | CDH23 V1137E   | HLA-B*44:03 | MT | DEGEFGR[E]W   | 161.73 | WT | DEGEFGR[V]W   | 155.51  | 9  | 1.28795  |
| Se043 | CDH23 V1137E   | HLA-C*14:03 | MT | FGR[E]WYRIL   | 197.06 | WT | FGR[V]WYRIL   | 594.08  | 9  | 1.28795  |
| Se043 | CDH23 V1137E   | HLA-A*33:03 | MT | GEFGR[E]WYR   | 215.97 | WT | GEFGR[V]WYR   | 82.02   | 9  | 1.28795  |
| Se043 | CDH23 V1137E   | HLA-A*33:03 | MT | EGEFGR[E]WYR  | 321.14 | WT | EGEFGR[V]WYR  | 126.42  | 10 | 1.28795  |
| Se043 | CDH23 V1137E   | HLA-B*44:03 | MT | GEFGR[E]WYRI  | 390.74 | WT | GEFGR[V]WYRI  | 171     | 10 | 1.28795  |
| Se043 | CD19 E243K     | HLA-C*14:03 | MT | MWVM[K]TGLLL  | 130.54 | WT | MWVM[E]TGLLL  | 167.03  | 10 | 1.16242  |
| Se043 | CD19 E243K     | HLA-A*33:03 | MT | VM[K]TGLLLPR  | 157.12 | WT | VM[E]TGLLLPR  | 1119.97 | 10 | 1.16242  |
| Se043 | CD19 E243K     | HLA-C*14:03 | MT | WVM[K]TGLLL   | 159.68 | WT | WVM[E]TGLLL   | 109.69  | 9  | 1.16242  |
| Se043 | CD19 E243K     | HLA-A*33:03 | MT | MWVM[K]TGLL   | 176.8  | WT | MWVM[E]TGLL   | 270.79  | 9  | 1.16242  |
| Se043 | CD19 E243K     | HLA-C*12:02 | MT | WVM[K]TGLLL   | 320.49 | WT | WVM[E]TGLLL   | 116.28  | 9  | 1.16242  |
| Se043 | TP53 K32E      | HLA-C*12:02 | MT | MAIY[E]QSQHM  | 167.76 | WT | MAIY[K]QSQHM  | 106.84  | 10 | 32.32562 |
| Se043 | TP53 K32E      | HLA-C*12:02 | MT | AIY[E]QSQHM   | 206.2  | WT | AIY[K]QSQHM   | 580.07  | 9  | 32.32562 |
| Se043 | EPB41L3 R129S  | HLA-A*33:03 | MT | YTCDVVEK[S]SR | 118.14 | WT | YTCDVVEK[R]SR | 269.67  | 10 | 5.05393  |
| Se043 | CEP192 L1428S  | HLA-A*33:03 | MT | [S]VFKNKAIIR  | 69.32  | WT | [L]VFKNKAIIR  | 116.29  | 10 | 4.67779  |
| Se043 | CEP192 L1428S  | HLA-A*33:03 | MT | STYRC[S]VFK   | 143.63 | WT | STYRC[L]VFK   | 109.66  | 9  | 4.67779  |
| Se043 | CEP192 L1428S  | HLA-C*12:02 | MT | LSTYRC[S]VF   | 175.59 | WT | LSTYRC[L]VF   | 333.34  | 9  | 4.67779  |
| Se043 | ICAM1 R225W    | HLA-C*12:02 | MT | LVSP[R]VLEV   | 128.59 | WT | LVSP[R]VLEV   | 163.78  | 9  | 51.86255 |
| Se043 | LIN37 P65L     | HLA-A*33:03 | MT | [L]SARFPHQ    | 87.3   | WT | [P]SARFPHQ    | 1041.22 | 9  | 8.99055  |
| Se043 | LIN37 P65L     | HLA-A*33:03 | MT | R[L]SARFPHQ   | 150.07 | WT | R[P]SARFPHQ   | 767.77  | 10 | 8.99055  |
| Se043 | LIN37 P65L     | HLA-A*33:03 | MT | ATGKR[L]SAR   | 172.01 | WT | ATGKR[P]SAR   | 497.89  | 9  | 8.99055  |
| Se043 | LIN37 P65L     | HLA-A*33:03 | MT | [L]SARFPHQ    | 267.19 | WT | [P]SARFPHQ    | 2862.61 | 10 | 8.99055  |
| Se043 | LIN37 P65L     | HLA-A*33:03 | MT | AATGKR[L]SAR  | 300.46 | WT | AATGKR[P]SAR  | 520.51  | 10 | 8.99055  |
| Se044 | BEST4 G19C     | HLA-A*31:01 | MT | GGFS[G]LLLR   | 46.9   | WT | GGFS[G]LLLR   | 84.67   | 9  | 1.22249  |
| Se044 | BEST4 G19C     | HLA-A*31:01 | MT | GFS[C]LLLRWR  | 101.78 | WT | GFS[G]LLLRWR  | 166.43  | 10 | 1.22249  |
| Se044 | BEST4 G19C     | HLA-B*40:02 | MT | AEARFGGFS[C]  | 151    | WT | AEARFGGFS[G]  | 366.21  | 10 | 1.22249  |
| Se044 | BEST4 G19C     | HLA-A*31:01 | MT | FS[C]JLLLRWR  | 282.88 | WT | FS[G]JLLLRWR  | 762.83  | 9  | 1.22249  |
| Se044 | BEST4 G19C     | HLA-A*24:02 | MT | RFGGFS[C]LLL  | 352.29 | WT | RFGGFS[G]LLL  | 708.86  | 10 | 1.22249  |
| Se044 | GMCL1 K482N    | HLA-B*40:02 | MT | LE[N]DQEQVVM  | 318.99 | WT | LE[K]DQEQVVM  | 645.86  | 10 | 7.92153  |
| Se044 | PIKFYVE L1632I | HLA-C*12:02 | MT | FANL[I]PGNSY  | 38.91  | WT | FANL[L]PGNSY  | 46.3    | 10 | 2.60661  |
| Se044 | PIKFYVE L1632I | HLA-C*03:04 | MT | FANL[I]PGNSY  | 140.35 | WT | FANL[L]PGNSY  | 163.59  | 10 | 2.60661  |
| Se044 | UGDH E150Q     | HLA-C*03:04 | MT | LTNTWSS[Q]L   | 401.88 | WT | LTNTWSS[E]L   | 167.22  | 10 | 17.99307 |
| Se044 | ANKRD37 R144P  | HLA-C*03:04 | MT | VAVLRQK[P]SL  | 257.29 | WT | VAVLRQK[R]SL  | 427.63  | 10 | 4.98828  |
| Se044 | PDZD2 R565H    | HLA-C*03:04 | MT | HIVKKS[T]R]SL | 230.86 | WT | HIVKKS[R]SL   | 271.57  | 10 | 4.8374   |
| Se044 | PDZD2 R565H    | HLA-C*12:02 | MT | ST[H]SLSTTQV  | 278.36 | WT | ST[R]SLSTTQV  | 822.46  | 10 | 4.8374   |
| Se044 | GIN1 G409W     | HLA-A*31:01 | MT | VLRDNT[W]VR   | 62.35  | WT | VLRDNT[G]VR   | 941.83  | 9  | 2.02551  |
| Se044 | GIN1 G409W     | HLA-A*31:01 | MT | AVLRDNT[W]VR  | 67.67  | WT | AVLRDNT[G]VR  | 415.28  | 10 | 2.02551  |
| Se044 | GIN1 G409W     | HLA-A*31:01 | MT | RDNT[W]VRLKR  | 297.44 | WT | RDNT[G]VRLKR  | 1417.97 | 10 | 2.02551  |
| Se044 | GOLGA2 A154G   | HLA-B*40:02 | MT | GEGPASS[G]NL  | 346.19 | WT | GEGPASS[A]NL  | 197.83  | 10 | 23.85667 |
| Se044 | ATG2A L288V    | HLA-A*31:01 | MT | SLHL[V]LTPR   | 23.26  | WT | SLHL[L]LTPR   | 31.77   | 9  | 5.35722  |
| Se044 | ATG2A L288V    | HLA-A*31:01 | MT | GSLHL[V]LTPR  | 25.23  | WT | GSLHL[L]LTPR  | 27.25   | 10 | 5.35722  |
| Se044 | ATG2A L288V    | HLA-B*40:02 | MT | GQLGSLHL[V]L  | 110.21 | WT | GQLGSLHL[L]L  | 167.93  | 10 | 5.35722  |
| Se044 | ARL2 S151I     | HLA-B*40:02 | MT | IDWLLDDIS[I]  | 365.79 | WT | IDWLLDDIS[S]  | 9898.18 | 10 | 12.12582 |
| Se044 | TENM4 H2344Q   | HLA-A*24:02 | MT | LYYDLQ[Q]LF   | 37.02  | WT | LYYDLQ[H]LF   | 29.7    | 10 | 2.60317  |
| Se044 | TENM4 H2344Q   | HLA-A*24:02 | MT | YYDLQ[Q]LF    | 106.99 | WT | YYDLQ[H]LF    | 64.07   | 9  | 2.60317  |
| Se044 | TENM4 H2344Q   | HLA-B*40:02 | MT | YDLQ[Q]LFAM   | 383.86 | WT | YDLQ[H]LFAM   | 182.16  | 10 | 2.60317  |
| Se044 | LRP1 A2366T    | HLA-C*03:04 | MT | AALSG[T]NVL   | 12.5   | WT | AALSG[A]NVL   | 15.24   | 9  | 13.76187 |
| Se044 | LRP1 A2366T    | HLA-C*03:04 | MT | RAALSG[T]NVL  | 18.81  | WT | RAALSG[A]NVL  | 24.39   | 10 | 13.76187 |
| Se044 | LRP1 A2366T    | HLA-C*12:02 | MT | RAALSG[T]NVL  | 213.79 | WT | RAALSG[A]NVL  | 327.12  | 10 | 13.76187 |
| Se044 | LRP1 A2366T    | HLA-C*03:04 | MT | LSG[T]NVLTL   | 285.95 | WT | LSG[A]NVLTL   | 193.37  | 9  | 13.76187 |
| Se044 | LRP1 A2366T    | HLA-C*03:04 | MT | RAALSG[T]NV   | 308.21 | WT | RAALSG[A]NV   | 430.58  | 9  | 13.76187 |
| Se044 | LRP1 A2366T    | HLA-C*12:02 | MT | RAALSG[T]NV   | 424.83 | WT | RAALSG[A]NV   | 562.09  | 9  | 13.76187 |
| Se044 | LRP1 A2366T    | HLA-C*12:02 | MT | AALSG[T]NVL   | 493.68 | WT | AALSG[A]NVL   | 926.44  | 9  | 13.76187 |
| Se044 | MYCBP2 T2374A  | HLA-B*40:02 | MT | KEARYIAI[A]M  | 14.32  | WT | KEARYIAI[T]M  | 18.39   | 10 | 5.39712  |
| Se044 | MYCBP2 T2374A  | HLA-B*40:02 | MT | KEARYIAI[A]   | 44.65  | WT | KEARYIAI[T]   | 81.25   | 9  | 5.39712  |
| Se044 | MYCBP2 T2374A  | HLA-A*24:02 | MT | RYIAI[A]MMKV  | 62.16  | WT | RYIAI[T]MMKV  | 45.93   | 10 | 5.39712  |
| Se044 | MYCBP2 T2374A  | HLA-A*31:01 | MT | RYIAI[A]MMK   | 83     | WT | RYIAI[T]MMK   | 68.21   | 9  | 5.39712  |
| Se044 | MYCBP2 T2374A  | HLA-C*12:02 | MT | IAI[A]MMKVY   | 204.16 | WT | IAI[T]MMKVY   | 345.85  | 9  | 5.39712  |
| Se044 | MYCBP2 T2374A  | HLA-C*12:02 | MT | I[A]MMKVYENY  | 298.33 | WT | I[T]MMKVYENY  | 631.21  | 10 | 5.39712  |
| Se044 | MYCBP2 T2374A  | HLA-C*12:02 | MT | YIAI[A]MMKV   | 427.59 | WT | YIAI[T]MMKV   | 423.74  | 9  | 5.39712  |
| Se044 | MYCBP2 T2374A  | HLA-C*03:04 | MT | IAI[A]MMKVY   | 459.35 | WT | IAI[T]MMKVY   | 747.47  | 9  | 5.39712  |
| Se044 | SYNE2 E694D    | HLA-B*40:02 | MT | KE[D]KATVEF   | 313.12 | WT | KE[E]KATVEF   | 302.49  | 9  | 1.79911  |
| Se044 | AMFR D576N     | HLA-A*31:01 | MT | RFSKSA[N]ER   | 83.2   | WT | RFSKSA[D]ER   | 324.24  | 9  | 20.50426 |
| Se044 | AMFR D576N     | HLA-C*12:02 | MT | SA[N]JERQRMLV | 424.61 | WT | SA[D]JERQRMLV | 2027.33 | 10 | 20.50426 |
| Se044 | AMFR D576N     | HLA-C*03:04 | MT | SA[N]JERQRML  | 474.86 | WT | SA[D]JERQRML  | 726.37  | 9  | 20.50426 |
| Se044 | TP53 G112D     | HLA-A*31:01 | MT | SSCM[D]GMNR   | 357.51 | WT | SSCM[G]GMNR   | 110.57  | 9  | 30.03394 |
| Se044 | TP53 G112D     | HLA-A*31:01 | MT | SSCM[D]GMNRR  | 392.86 | WT | SSCM[G]GMNRR  | 172.56  | 10 | 30.03394 |
| Se044 | FCGBP C758G    | HLA-B*40:02 | MT | YELCGPA[G]PT  | 63.3   | WT | YELCGPA[C]PT  | 54.51   | 10 | 1.46501  |
| Se047 | WDTC1 T305N    | HLA-C*12:02 | MT | LTYKQRPY[N]F  | 462.84 | WT | LTYKQRPY[T]F  | 160.14  | 10 | 4.96473  |

|       |               |             |    |               |        |    |              |          |    |           |
|-------|---------------|-------------|----|---------------|--------|----|--------------|----------|----|-----------|
| Se047 | POGZ K719M    | HLA-C*12:02 | MT | FKNSVSGI[M]   | 402.13 | WT | FKNSVSGI[K]  | 24199.97 | 9  | 14.95625  |
| Se047 | POGZ K719M    | HLA-C*12:02 | MT | [M]LACTSCTF   | 487.95 | WT | [K]LACTSCTF  | 2309.03  | 9  | 14.95625  |
| Se047 | RASSF5 L191V  | HLA-C*12:02 | MT | SIADRPLY[V]   | 73.69  | WT | SIADRPLY[L]  | 102.35   | 9  | 4.79236   |
| Se047 | RASSF5 L191V  | HLA-C*12:02 | MT | LSIADRPLY[V]  | 219.75 | WT | LSIADRPLY[L] | 292.16   | 10 | 4.79236   |
| Se047 | TTC7A G106A   | HLA-C*12:02 | MT | MAAKVCI[A]SL  | 36.41  | WT | MAAKVCI[G]SL | 78.51    | 10 | 6.35396   |
| Se047 | DCTN1 L67V    | HLA-C*12:02 | MT | [V]TSPGAVPPL  | 360.52 | WT | [L]TSPGAVPPL | 192.66   | 10 | 17.49277  |
| Se047 | FN1 L1952F    | HLA-C*12:02 | MT | [F]TRGATYNI   | 241.25 | WT | [L]TRGATYNI  | 1850.87  | 10 | 71.43351  |
| Se047 | FN1 L1952F    | HLA-C*12:02 | MT | [F]TRGATYNI   | 299.63 | WT | [L]TRGATYNI  | 2226.66  | 9  | 71.43351  |
| Se047 | FN1 L1952F    | HLA-A*26:03 | MT | STSATLTG[F]   | 372.84 | WT | STSATLTG[L]  | 1064.92  | 9  | 71.43351  |
| Se047 | FN1 L1952F    | HLA-C*12:02 | MT | STSATLTG[F]   | 448.05 | WT | STSATLTG[L]  | 474.96   | 9  | 71.43351  |
| Se047 | BOC S666Y     | HLA-C*12:02 | MT | SAIPPSRL[Y]V  | 25.3   | WT | SAIPPSRL[S]V | 29.88    | 10 | 5.35949   |
| Se047 | BOC S666Y     | HLA-C*12:02 | MT | SAIPPSRL[Y]   | 79.93  | WT | SAIPPSRL[S]  | 2745.53  | 9  | 5.35949   |
| Se047 | WDR19 D355Y   | HLA-C*12:02 | MT | [Y]ACSTRIAYL  | 37.79  | WT | [D]ACSTRIAYL | 3842.24  | 10 | 8.43838   |
| Se047 | WDR19 D355Y   | HLA-C*12:02 | MT | [Y]ACSTRIAY   | 142.77 | WT | [D]ACSTRIAY  | 7582.26  | 9  | 8.43838   |
| Se047 | FAM24B K34N   | HLA-C*12:02 | MT | AA[N]EPEAVAV  | 232.25 | WT | AA[K]EPEAVAV | 848.55   | 10 | 5.62179   |
| Se047 | HELZ S752C    | HLA-C*12:02 | MT | ISSAH[C]TFQM  | 213.97 | WT | ISSAH[S]TFQM | 120.87   | 10 | 2.36889   |
| Se047 | HELZ S752C    | HLA-C*12:02 | MT | SSAH[C]TFQM   | 353.3  | WT | SSAH[S]TFQM  | 231.57   | 9  | 2.36889   |
| Se047 | LLGL2 G370D   | HLA-C*12:02 | MT | QTA[D]WPPVQL  | 359.57 | WT | QTA[G]WPPVQL | 724.16   | 10 | 17.3001   |
| Se047 | ZBTB14 L231F  | HLA-C*12:02 | MT | [F]GSGTQPAL   | 208.02 | WT | [L]GSGTQPAL  | 2079.92  | 9  | 2.7574    |
| Se047 | CAPS G195A    | HLA-C*12:02 | MT | RS[A]DGVVTV   | 79.86  | WT | RS[G]DGVVTV  | 1286.6   | 9  | 69.76995  |
| Se047 | SARS2 E301K   | HLA-A*26:03 | MT | GTA[K]VGLAGY  | 461.63 | WT | GTA[E]VGLAGY | 236.07   | 10 | 15.60311  |
| Se047 | CBFA2T2 R329H | HLA-A*26:03 | MT | ELVDH[H]LTER  | 439.14 | WT | ELVDH[R]LTER | 673.98   | 10 | 8.76817   |
| Se047 | PABPC1L V518F | HLA-C*12:02 | MT | SAAHSTYR[F]   | 208.45 | WT | SAAHSTYR[V]  | 158.47   | 9  | 17.11761  |
| Se047 | PABPC1L V518F | HLA-C*12:02 | MT | SSAAHSTYR[F]  | 298.9  | WT | SSAAHSTYR[V] | 223.62   | 10 | 17.11761  |
| Se047 | TYMP D209H    | HLA-C*12:02 | MT | VTATV[H]SLPL  | 228.45 | WT | VTATV[D]SLPL | 459.95   | 10 | 174.96252 |
| Se047 | TYMP D209H    | HLA-C*12:02 | MT | TATV[H]SLPL   | 315.04 | WT | TATV[D]SLPL  | 1028.29  | 9  | 174.96252 |
| Se047 | TYMP D209H    | HLA-C*12:02 | MT | [H]SLPLITASI  | 467.91 | WT | [D]SLPLITASI | 4832.49  | 10 | 174.96252 |
| Se047 | PHKA1 I562V   | HLA-C*12:02 | MT | [V]TFPISHSM   | 64.48  | WT | [I]TFPISHSM  | 29.06    | 9  | 1.26628   |
| Se047 | PHKA1 I562V   | HLA-C*12:02 | MT | [V]TFPISHSML  | 214.63 | WT | [I]TFPISHSML | 99.52    | 10 | 1.26628   |
| Se047 | PHKA1 I562V   | HLA-C*12:02 | MT | MTGQPT[V]TF   | 370.74 | WT | MTGQPT[I]TF  | 542.16   | 9  | 1.26628   |
| Se047 | PHKA1 I562V   | HLA-A*26:03 | MT | T[V]TFPISHSM  | 448.18 | WT | T[I]TFPISHSM | 1226.65  | 10 | 1.26628   |
| Se047 | G6PD K538M    | HLA-C*12:02 | MT | FQYEGTY[M]WV  | 28.6   | WT | FQYEGTY[K]WV | 81.9     | 10 | 12.22432  |
| Se047 | G6PD K538M    | HLA-B*52:01 | MT | FQYEGTY[M]W   | 480.06 | WT | FQYEGTY[K]W  | 662.88   | 9  | 12.22432  |
| Se048 | LEPR S791C    | HLA-A*31:01 | MT | KWLRISS[C]VK  | 304.17 | WT | KWLRISS[S]VK | 264.51   | 10 | 3.61194   |
| Se048 | WDR54 L244I   | HLA-A*02:01 | MT | HLYEATTGN[I]  | 95.35  | WT | HLYEATTGN[L] | 59.08    | 10 | 5.97244   |
| Se048 | GYP C D27G    | HLA-A*31:01 | MT | GMSGWP[G]GR   | 155.69 | WT | GMSGWP[D]GR  | 228.96   | 9  | 99.05636  |
| Se048 | WDR1 Q14E     | HLA-A*02:01 | MT | KVFASLP[E]V   | 5.52   | WT | KVFASLP[Q]V  | 11.14    | 9  | 81.2922   |
| Se048 | WDR1 Q14E     | HLA-A*31:01 | MT | VFASLP[E]VER  | 190.97 | WT | VFASLP[Q]VER | 113.93   | 10 | 81.2922   |
| Se048 | WDR1 Q14E     | HLA-A*02:01 | MT | SLP[Q]VERGV   | 283.68 | WT | SLP[V]VERGV  | 1886.72  | 9  | 81.2922   |
| Se048 | RAD23B M267I  | HLA-A*31:01 | MT | RNQPQFQQ[I]R  | 144.07 | WT | RNQPQFQQ[M]R | 93.93    | 10 | 18.77901  |
| Se048 | DCHS1 R2217H  | HLA-A*02:01 | MT | SQPA[H]GLFHV  | 218.37 | WT | SQPA[R]GLFHV | 564.29   | 10 | 7.75282   |
| Se048 | DDX51 S561N   | HLA-A*02:01 | MT | LLI[N]TDATA   | 472.18 | WT | LLI[S]TDATA  | 419.25   | 9  | 6.83772   |
| Se048 | ZNF592 R608Q  | HLA-A*31:01 | MT | KLSLQHYG[Q]R  | 12.87  | WT | KLSLQHYG[R]R | 14.96    | 10 | 1.78928   |
| Se048 | ZNF592 R608Q  | HLA-A*31:01 | MT | SLSQHYG[Q]R   | 179.03 | WT | SLSQHYG[R]R  | 234.72   | 9  | 1.78928   |
| Se048 | LRRK1 T1196M  | HLA-A*02:01 | MT | VL[M]AIERDFI  | 88.07  | WT | VL[T]AIERDFI | 1130.58  | 10 | 7.73255   |
| Se048 | TP53 S82C     | HLA-A*02:01 | MT | FLHSGTAK[C]V  | 52.09  | WT | FLHSGTAK[S]V | 23.12    | 10 | 2.3181    |
| Se048 | TP53 S82C     | HLA-A*02:01 | MT | FLHSGTAK[C]   | 417.76 | WT | FLHSGTAK[S]  | 614.94   | 9  | 2.3181    |
| Se048 | PHF20 P570L   | HLA-A*31:01 | MT | [S]LJPKAFAVTR | 121.97 | WT | [P]PKAFAVTR  | 5998.48  | 10 | 6.77755   |
| Se048 | DLGAP4 E210K  | HLA-A*31:01 | MT | SWQLVETP[E]K  | 406.73 | WT | SWQLVETP[E]  | 26229.73 | 9  | 13.97992  |
| Se049 | TAF1A I163M   | HLA-C*03:04 | MT | FPSNPNAH[M]   | 438.63 | WT | FPSNPNAH[I]  | 1235.69  | 9  | 3.09667   |
| Se049 | PYCR2 E36Q    | HLA-C*03:04 | MT | IASSP[Q]MNL   | 89.44  | WT | IASSP[E]MNL  | 229.79   | 9  | 80.89696  |
| Se049 | PYCR2 E36Q    | HLA-B*15:01 | MT | KIIASSP[Q]M   | 263.59 | WT | KIIASSP[E]M  | 195.02   | 9  | 80.89696  |
| Se049 | PYCR2 E36Q    | HLA-B*15:01 | MT | [Q]MNLPTVSAL  | 282.89 | WT | [E]MNLPTVSAL | 1214.76  | 10 | 80.89696  |
| Se049 | PYCR2 E36Q    | HLA-C*03:04 | MT | [Q]MNLPTVSAL  | 366.12 | WT | [E]MNLPTVSAL | 900.23   | 10 | 80.89696  |
| Se049 | PYCR2 E36Q    | HLA-C*03:04 | MT | IASSP[Q]MNL   | 470.78 | WT | IASSP[E]MNL  | 1125.02  | 10 | 80.89696  |
| Se049 | C1orf131 L32V | HLA-A*24:02 | MT | A[L]QLNLYDF   | 490.59 | WT | A[L]QLNLYDF  | 355.16   | 9  | 2.54004   |
| Se049 | MBD5 H218Y    | HLA-B*15:01 | MT | GQKSPFRGS[Y]  | 39.25  | WT | GQKSPFRGS[H] | 2076.72  | 10 | 2.16871   |
| Se049 | C3orf18 T56M  | HLA-C*03:04 | MT | [M]JAGVGTMLL  | 64.94  | WT | [T]JAGVGTMLL | 532.44   | 9  | 2.49481   |
| Se049 | PARP14 I921V  | HLA-C*03:04 | MT | IAIPA[V]SSGV  | 34.12  | WT | IAIPA[I]SSGV | 43.35    | 10 | 32.3772   |
| Se049 | PARP14 I921V  | HLA-C*03:04 | MT | [V]SSGVFGFPL  | 249.2  | WT | [I]SSGVFGFPL | 122.97   | 10 | 32.3772   |
| Se049 | PARP14 I921V  | HLA-B*15:01 | MT | A[V]SSGVFGF   | 287.21 | WT | A[I]SSGVFGF  | 177.88   | 9  | 32.3772   |
| Se049 | PARP14 I921V  | HLA-B*15:01 | MT | AIPA[V]SSGVF  | 307.15 | WT | AIPA[I]SSGVF | 404.18   | 10 | 32.3772   |
| Se049 | NDFIP1 R111M  | HLA-B*15:01 | MT | L[M]IGNDGIF   | 17.35  | WT | L[R]IGNDGIF  | 7160.15  | 9  | 35.0732   |
| Se049 | NDFIP1 R111M  | HLA-B*15:01 | MT | L[M]IGNDGIFM  | 92.27  | WT | L[R]IGNDGIFM | 12898.5  | 10 | 35.0732   |
| Se049 | NDFIP1 R111M  | HLA-B*15:01 | MT | QL[M]IGNDGIF  | 271    | WT | QL[R]IGNDGIF | 348.76   | 10 | 35.0732   |
| Se049 | NDFIP1 R111M  | HLA-C*03:04 | MT | L[M]IGNDGIFM  | 394.78 | WT | L[R]IGNDGIFM | 10390.3  | 10 | 35.0732   |
| Se049 | SETX V1974L   | HLA-B*15:01 | MT | KSKTI[L]GLLY  | 231.71 | WT | KSKTI[V]GLLY | 219.63   | 10 | 4.23908   |
| Se049 | RNF31 R374C   | HLA-B*15:01 | MT | LQWL[R]SELPE  | 79.54  | WT | LQWL[R]SELPE | 72.25    | 10 | 12.76782  |
| Se049 | EPG5 Q2519P   | HLA-C*03:04 | MT | KAQ[P]ALNAL   | 42.43  | WT | KAQ[Q]ALNAL  | 50.49    | 9  | 1.11497   |
| Se049 | EPG5 Q2519P   | HLA-C*03:04 | MT | HLPKAQ[P]AL   | 441.08 | WT | HLPKAQ[Q]AL  | 519.9    | 10 | 1.11497   |
| Se049 | EPG5 Q2519P   | HLA-C*03:04 | MT | LTPKAQ[P]AL   | 464.96 | WT | LTPKAQ[Q]AL  | 437.74   | 9  | 1.11497   |
| Se049 | NACC1 R89Q    | HLA-C*03:04 | MT | FCYTG[Q]LSM   | 40.17  | WT | FCYTG[R]LSM  | 59.76    | 9  | 18.04126  |
| Se049 | NACC1 R89Q    | HLA-C*03:04 | MT | LSFCYTG[Q]L   | 312.32 | WT | LSFCYTG[R]L  | 621.97   | 9  | 18.04126  |
| Se049 | NACC1 R89Q    | HLA-B*15:01 | MT | [Q]LSMNVGDQF  | 369.32 | WT | [R]LSMNVGDQF | 133.33   | 10 | 18.04126  |
| Se049 | CLASRP D274Y  | HLA-B*15:01 | MT | FITSFGGS[Y]   | 104.76 | WT | FITSFGGS[D]  | 26086.81 | 9  | 12.08022  |
| Se049 | CLASRP D274Y  | HLA-B*40:02 | MT | [Y]EEAAAAAAA  | 204.02 | WT | [D]EEAAAAAAA | 5586.83  | 10 | 12.08022  |
| Se049 | CLASRP D274Y  | HLA-B*40:02 | MT | [Y]EEAAAAAAA  | 204.02 | WT | [D]EEAAAAAAA | 5586.83  | 10 | 12.08022  |
| Se049 | CLASRP D274Y  | HLA-B*15:01 | MT | TFITSFGGS[Y]  | 455.83 | WT | TFITSFGGS[D] | 31406.15 | 10 | 12.08022  |

|       |               |             |    |               |        |    |               |          |    |           |
|-------|---------------|-------------|----|---------------|--------|----|---------------|----------|----|-----------|
| Se049 | ZNF264 V569L  | HLA-B*15:01 | MT | S[L]TDVGRPF   | 66.8   | WT | S[V]TDVGRPF   | 405.16   | 9  | 1.66022   |
| Se049 | ZNF264 V569L  | HLA-B*15:01 | MT | IS[L]TDVGRPF  | 204.88 | WT | IS[V]TDVGRPF  | 87.52    | 10 | 1.66022   |
| Se049 | ZNF264 V569L  | HLA-C*03:04 | MT | IS[L]TDVGRPF  | 271.97 | WT | IS[V]TDVGRPF  | 172.74   | 10 | 1.66022   |
| Se049 | ZNF264 V569L  | HLA-C*03:04 | MT | S[L]TDVGRPF   | 403.05 | WT | S[V]TDVGRPF   | 177.14   | 9  | 1.66022   |
| Se049 | TRMT6 L114F   | HLA-B*15:01 | MT | KLTDQDDIKA[F] | 482.14 | WT | KLTDQDDIKA[L] | 7750.8   | 10 | 9.7649    |
| Se050 | PCNXL2 L609V  | HLA-B*40:01 | MT | AEQNEESG[V]L  | 31.43  | WT | AEQNEESG[L]L  | 39.53    | 10 | 2.84701   |
| Se050 | CCDC138 A225G | HLA-C*07:02 | MT | FRHEN[G]LSKI  | 96.99  | WT | FRHEN[A]LSKI  | 71.04    | 10 | 2.88684   |
| Se050 | MOGAT1 V333L  | HLA-C*03:04 | MT | YGIPEHETL[L]  | 174.38 | WT | YGIPEHETL[V]  | 1049.58  | 10 | 1.18382   |
| Se050 | MOGAT1 V333L  | HLA-B*07:02 | MT | IPEHETL[L]L   | 303.79 | WT | IPEHETL[V]L   | 62.71    | 9  | 1.18382   |
| Se050 | SEN7 H512R    | HLA-A*24:02 | MT | [R]YYCVSTCSF  | 9.84   | WT | [H]YYCVSTCSF  | 24.65    | 10 | 2.79743   |
| Se050 | SEN7 H512R    | HLA-C*07:02 | MT | [R]YYCVSTCSF  | 162.83 | WT | [H]YYCVSTCSF  | 113.02   | 10 | 2.79743   |
| Se050 | LG12 A509S    | HLA-B*07:02 | MT | [S]PRSFTAVST  | 19.36  | WT | [A]PRSFTAVST  | 22.62    | 10 | 1.10535   |
| Se050 | LG12 A509S    | HLA-A*24:02 | MT | IYVQ[S]PRSF   | 58.12  | WT | IYVQ[A]PRSF   | 60.22    | 9  | 1.10535   |
| Se050 | LG12 A509S    | HLA-B*07:02 | MT | [S]PRSFTAVS   | 69.77  | WT | [A]PRSFTAVS   | 84.78    | 9  | 1.10535   |
| Se050 | LG12 A509S    | HLA-C*07:02 | MT | IYVQ[S]PRSF   | 116.93 | WT | IYVQ[A]PRSF   | 103.84   | 9  | 1.10535   |
| Se050 | CLCN3 L432V   | HLA-B*40:01 | MT | KE[V]FTDCGPL  | 23.55  | WT | KE[L]FTDCGPL  | 28.8     | 10 | 5.53575   |
| Se050 | PCDHGB4 R645C | HLA-C*03:04 | MT | AV[C]DGGQPPL  | 448.69 | WT | AV[R]DGGQPPL  | 296.51   | 10 | 3.2682    |
| Se050 | MAP3K7 H244R  | HLA-B*07:02 | MT | AV[R]NGTRPPL  | 17.52  | WT | AV[H]NGTRPPL  | 78.67    | 10 | 13.31438  |
| Se050 | MAP3K7 H244R  | HLA-C*07:02 | MT | V[R]NGTRPPL   | 295.66 | WT | V[H]NGTRPPL   | 5476.23  | 9  | 13.31438  |
| Se050 | MAP3K7 H244R  | HLA-C*07:02 | MT | V[R]NGTRPPLI  | 379.38 | WT | V[H]NGTRPPLI  | 3726.24  | 10 | 13.31438  |
| Se050 | PTPRK N986H   | HLA-C*03:04 | MT | IVMVT[H]LVEV  | 141.68 | WT | IVMVT[N]LVEV  | 147.72   | 10 | 10.36199  |
| Se050 | PLAGL1 F232L  | HLA-C*03:04 | MT | HTISPS[L]QL   | 38.77  | WT | HTISPS[F]QL   | 88.15    | 9  | 5.46766   |
| Se050 | PLAGL1 F232L  | HLA-C*03:04 | MT | STFHITSPS[L]  | 58.55  | WT | STFHITSPS[F]  | 140.13   | 10 | 5.46766   |
| Se050 | PLAGL1 F232L  | HLA-B*07:02 | MT | SPS[L]QLKAAA  | 93.07  | WT | SPS[F]QLKAAA  | 75.06    | 10 | 5.46766   |
| Se050 | PLAGL1 F232L  | HLA-B*07:02 | MT | SPS[L]QLKAA   | 135.27 | WT | SPS[F]QLKAA   | 105.74   | 9  | 5.46766   |
| Se050 | SLC12A9 T190I | HLA-C*03:04 | MT | FAVLFNCG[I]   | 155.4  | WT | FAVLFNCG[T]   | 3726.02  | 9  | 9.71369   |
| Se050 | YAP1 R124G    | HLA-C*03:04 | MT | [G]AHSSPASL   | 100.41 | WT | [R]AHSSPASL   | 26.69    | 9  | 11.46805  |
| Se050 | YAP1 R124G    | HLA-C*03:04 | MT | V[G]AHSSPASL  | 477.75 | WT | V[R]AHSSPASL  | 3391.03  | 10 | 11.46805  |
| Se050 | TP53 R116W    | HLA-C*07:02 | MT | [W]RPILTIITL  | 173.08 | WT | [R]RPILTIITL  | 156.92   | 10 | 26.63736  |
| Se050 | NLK V61L      | HLA-C*03:04 | MT | HLHPGSAAL[L]  | 58.42  | WT | HLHPGSAAL[V]  | 336.21   | 10 | 3.31195   |
| Se050 | NLK V61L      | HLA-B*07:02 | MT | HLHPGSAAL[L]  | 256.73 | WT | HLHPGSAAL[V]  | 1999.99  | 10 | 3.31195   |
| Se050 | DLGAP1 H119P  | HLA-C*03:04 | MT | LSRDGY[P]TL   | 351.26 | WT | LSRDGY[H]TL   | 298.79   | 9  | 1.09452   |
| Se050 | DLGAP1 H119P  | HLA-B*07:02 | MT | Y[P]TLQYKRRTA | 358.35 | WT | Y[H]TLQYKRRTA | 30524.16 | 10 | 1.09452   |
| Se050 | DLGAP1 H119P  | HLA-B*07:02 | MT | LPLSRDGY[P]T  | 382.41 | WT | LPLSRDGY[H]T  | 4089.33  | 10 | 1.09452   |
| Se050 | DSG2 A8S      | HLA-A*24:02 | MT | [S]YALLLLL    | 16.71  | WT | [A]YALLLLL    | 44.14    | 9  | 25.6055   |
| Se050 | DSG2 A8S      | HLA-B*07:02 | MT | SPGR[S]YALL   | 94.73  | WT | SPGR[A]YALL   | 81.23    | 9  | 25.6055   |
| Se050 | DSG2 A8S      | HLA-B*07:02 | MT | SPGR[S]YALLL  | 105.98 | WT | SPGR[A]YALLL  | 95.99    | 10 | 25.6055   |
| Se050 | DSG2 A8S      | HLA-B*07:02 | MT | MARSPGR[S]YA  | 181.33 | WT | MARSPGR[A]YA  | 222.56   | 10 | 25.6055   |
| Se050 | DSG2 A8S      | HLA-C*07:02 | MT | ARSPGR[S]YAL  | 251.17 | WT | ARSPGR[A]YAL  | 189.4    | 10 | 25.6055   |
| Se050 | DSG2 A8S      | HLA-C*07:02 | MT | GR[S]YALLLL   | 392.01 | WT | GR[A]YALLLL   | 401.05   | 9  | 25.6055   |
| Se050 | DSG2 A8S      | HLA-C*07:02 | MT | GR[S]YALLLLL  | 396.38 | WT | GR[A]YALLLLL  | 415.37   | 10 | 25.6055   |
| Se050 | DSG2 A8S      | HLA-C*03:04 | MT | RSPGR[S]YAL   | 442.65 | WT | RSPGR[A]YAL   | 419.22   | 9  | 25.6055   |
| Se050 | DSG2 A8S      | HLA-A*24:02 | MT | R[S]YALLLLL   | 482.05 | WT | R[A]YALLLLL   | 634.15   | 10 | 25.6055   |
| Se050 | SHKBP1 W225L  | HLA-B*40:01 | MT | KEASG[L]QLVF  | 37.45  | WT | KEASG[W]QLVF  | 33.36    | 10 | 20.96767  |
| Se050 | SHKBP1 W225L  | HLA-B*40:01 | MT | KEASG[L]QLV   | 97.78  | WT | KEASG[W]QLV   | 64.3     | 9  | 20.96767  |
| Se050 | SHKBP1 W225L  | HLA-C*07:02 | MT | YRLKEASG[L]   | 337.45 | WT | YRLKEASG[W]   | 6660.4   | 9  | 20.96767  |
| Se050 | PPP1R37 S291P | HLA-C*03:04 | MT | HVLD[P]GLAYI  | 289.85 | WT | HVLD[S]GLAYI  | 252.72   | 10 | 7.89522   |
| Se050 | PPP1R37 S291P | HLA-C*07:02 | MT | LRNNHVLD[L]   | 59.06  | WT | LRNNHVLD[S]   | 9391.8   | 9  | 7.89522   |
| Se050 | BCL2L12 Y162C | HLA-B*07:02 | MT | LP1RPC[C]GL   | 136.18 | WT | LP1RPC[Y]GL   | 164.13   | 9  | 15.0744   |
| Se050 | UQCC1 V18I    | HLA-B*07:02 | MT | [I]PVCSRIPV   | 30.86  | WT | [V]PVCSRIPV   | 46.78    | 10 | 4.51093   |
| Se050 | UQCC1 V18I    | HLA-A*24:02 | MT | QW[I]PVCSRLI  | 167.51 | WT | QW[V]PVCSRLI  | 459.1    | 10 | 4.51093   |
| Se050 | UQCC1 V18I    | HLA-C*03:04 | MT | TSISQW[I]PV   | 340.31 | WT | TSISQW[V]PV   | 329.71   | 9  | 4.51093   |
| Se050 | UQCC1 V18I    | HLA-A*24:02 | MT | QW[I]PVCSRSL  | 447.94 | WT | QW[V]PVCSRSL  | 1114.23  | 9  | 4.51093   |
| Se050 | UQCC1 V18I    | HLA-C*03:04 | MT | [I]PVCSRIPV   | 466.11 | WT | [V]PVCSRIPV   | 600.6    | 10 | 4.51093   |
| Se050 | CBY1 R79M     | HLA-B*07:02 | MT | RLR[M]RNQQL   | 72.8   | WT | RLR[R]RNQQL   | 86.5     | 9  | 21.24963  |
| Se050 | ARHGEF6 C139R | HLA-B*40:01 | MT | EEV[R]TFQQT   | 82.15  | WT | EEV[C]TFQQT   | 46.82    | 10 | 1.35157   |
| Se051 | CELSR2 A106T  | HLA-B*40:02 | MT | SEAHPLPP[T]   | 93.73  | WT | SEAHPLPP[A]   | 53.47    | 10 | 37.3869   |
| Se051 | ATP1A1 D202Y  | HLA-B*07:02 | MT | IPA[Y]LRIISA  | 56.58  | WT | IPA[D]LRIISA  | 121.79   | 10 | 179.55389 |
| Se051 | RCS1 P122L    | HLA-C*03:04 | MT | MVSPFHSP[L]   | 8.1    | WT | MVSPFHSP[P]   | 10519.36 | 9  | 3.45557   |
| Se051 | RCS1 P122L    | HLA-B*07:02 | MT | MVSPFHSP[L]   | 82.02  | WT | MVSPFHSP[P]   | 11063.35 | 9  | 3.45557   |
| Se051 | RCS1 P122L    | HLA-C*03:04 | MT | AMVSPFHSP[L]  | 95.66  | WT | AMVSPFHSP[P]  | 21946.53 | 10 | 3.45557   |
| Se051 | RCS1 P122L    | HLA-B*07:02 | MT | SPFHSP[L]ST   | 186.19 | WT | SPFHSP[P]ST   | 403.36   | 9  | 3.45557   |
| Se051 | ASPM K1802E   | HLA-B*40:02 | MT | V[E]KKAATCLQA | 443.33 | WT | V[K]KKAATCLQA | 24346.16 | 10 | 2.32807   |
| Se051 | HLX G29V      | HLA-C*03:04 | MT | SAGPG[V]CSF   | 96.81  | WT | SAGPG[G]CSF   | 130.02   | 9  | 1.50198   |
| Se051 | HLX G29V      | HLA-B*07:02 | MT | GPG[V]CSFPL   | 100.98 | WT | GPG[G]CSFPL   | 80.41    | 9  | 1.50198   |
| Se051 | HLX G29V      | HLA-C*03:04 | MT | SSAGPG[V]CSF  | 164.53 | WT | SSAGPG[G]CSF  | 247.25   | 10 | 1.50198   |
| Se051 | NTPCR T132M   | HLA-B*40:02 | MT | RQ[M]LSTPGTI  | 68.27  | WT | RQ[T]LSTPGTI  | 533.01   | 10 | 10.82859  |
| Se051 | NTPCR T132M   | HLA-C*03:04 | MT | [M]LSTPGTIL   | 81.25  | WT | [T]LSTPGTIL   | 483.23   | 10 | 10.82859  |
| Se051 | NTPCR T132M   | HLA-C*03:04 | MT | FIQAVRQ[M]L   | 219.15 | WT | FIQAVRQ[T]L   | 47.08    | 9  | 10.82859  |
| Se051 | KCNK1 K176N   | HLA-C*03:04 | MT | FS[N]QVVAIV   | 185.27 | WT | FS[K]QVVAIV   | 1056.01  | 9  | 19.8715   |
| Se051 | KCNK1 K176N   | HLA-C*03:04 | MT | WGFS[N]QVVAI  | 313.78 | WT | WGFS[K]QVVAI  | 1149.5   | 10 | 19.8715   |
| Se051 | CDCA7 S34F    | HLA-C*03:04 | MT | ISMETSSS[F]   | 10.38  | WT | ISMETSSS[S]   | 3858.62  | 9  | 14.93442  |
| Se051 | CDCA7 S34F    | HLA-C*03:04 | MT | SS[F]DDSCDSF  | 269.58 | WT | SS[S]DDSCDSF  | 1139.76  | 10 | 14.93442  |
| Se051 | CDCA7 S34F    | HLA-C*03:04 | MT | LISMETSSS[F]  | 279.29 | WT | LISMETSSS[S]  | 22793.49 | 10 | 14.93442  |
| Se051 | PODXL2 P304L  | HLA-B*40:02 | MT | GQHEEV[L]AL   | 228.52 | WT | GQHEEV[P]AL   | 245.74   | 9  | 4.83399   |
| Se051 | PODXL2 P304L  | HLA-B*40:02 | MT | HEEV[L]ALPSF  | 244.48 | WT | HEEV[P]ALPSF  | 509.11   | 10 | 4.83399   |
| Se051 | PODXL2 P304L  | HLA-B*40:02 | MT | EEV[L]ALPSF   | 419.04 | WT | EEV[P]ALPSF   | 529.54   | 9  | 4.83399   |
| Se051 | ATP13A3 Y618C | HLA-B*40:02 | MT | FELPAT[C]EI   | 48.31  | WT | FELPAT[Y]EI   | 22.41    | 9  | 16.16985  |

|       |                |             |    |               |        |    |               |          |    |           |
|-------|----------------|-------------|----|---------------|--------|----|---------------|----------|----|-----------|
| Se051 | ATP13A3 Y618C  | HLA-B*40:02 | MT | [C]EIGIVRQF   | 220.47 | WT | [Y]EIGIVRQF   | 52.6     | 9  | 16.16985  |
| Se051 | ICE1 N1870Y    | HLA-A*26:01 | MT | VTAEGIHK[Y]   | 160.43 | WT | VTAEGIHK[N]   | 31451.59 | 9  | 7.12915   |
| Se051 | PCDH12 Q964R   | HLA-B*07:02 | MT | SPPVQQIS[R]L  | 131.88 | WT | SPPVQQIS[Q]L  | 103.64   | 10 | 3.04494   |
| Se051 | PCDH12 Q964R   | HLA-B*40:02 | MT | QQIS[R]LLSL   | 278.8  | WT | QQIS[Q]LLSL   | 292.48   | 9  | 3.04494   |
| Se051 | PCDH12 Q964R   | HLA-B*40:02 | MT | QQIS[R]LLSL   | 361.42 | WT | QQIS[Q]LLSL   | 376.11   | 10 | 3.04494   |
| Se051 | SAP30L N79S    | HLA-A*24:02 | MT | LYICDFHK[S]F  | 22.63  | WT | LYICDFHK[N]F  | 23.21    | 10 | 6.66382   |
| Se051 | TP53I11 A137V  | HLA-B*40:02 | MT | TE[V]CYFGVQF  | 105.13 | WT | TE[A]CYFGVQF  | 111.39   | 10 | 58.68151  |
| Se051 | WNK1 K940N     | HLA-A*26:01 | MT | EIIIE[N]ADEM  | 56.65  | WT | EIIIE[K]ADEM  | 61.53    | 9  | 24.59376  |
| Se051 | WNK1 K940N     | HLA-B*40:02 | MT | REIIE[N]ADEM  | 72.94  | WT | REIIE[K]ADEM  | 97.37    | 10 | 24.59376  |
| Se051 | NR4A1 A504S    | HLA-B*07:02 | MT | VPAF[S]CLSAL  | 8.13   | WT | VPAF[A]CLSAL  | 8.15     | 10 | 57.70604  |
| Se051 | NR4A1 A504S    | HLA-C*03:04 | MT | F[S]CLSALVL   | 63.63  | WT | F[A]CLSALVL   | 9.73     | 9  | 57.70604  |
| Se051 | NR4A1 A504S    | HLA-B*07:02 | MT | VPAF[S]CLSA   | 183.07 | WT | VPAF[A]CLSA   | 160.06   | 9  | 57.70604  |
| Se051 | NR4A1 A504S    | HLA-C*03:04 | MT | LVDVPAF[S]CL  | 331.4  | WT | LVDVPAF[A]CL  | 307.24   | 10 | 57.70604  |
| Se051 | NR4A1 A504S    | HLA-C*03:04 | MT | VPAF[S]CLSAL  | 382.04 | WT | VPAF[A]CLSAL  | 349.76   | 10 | 57.70604  |
| Se051 | NR4A1 A504S    | HLA-C*03:04 | MT | PAF[S]CLSAL   | 383.33 | WT | PAF[A]CLSAL   | 309.65   | 9  | 57.70604  |
| Se051 | CCDC92 S8N     | HLA-A*26:01 | MT | MTSPHFS[N]Y   | 9.85   | WT | MTSPHFS[S]Y   | 6.97     | 9  | 9.18265   |
| Se051 | CCDC92 S8N     | HLA-C*03:04 | MT | FS[N]YDEGPL   | 28.58  | WT | FS[S]YDEGPL   | 34.68    | 9  | 9.18265   |
| Se051 | CCDC92 S8N     | HLA-C*03:04 | MT | MTSPHFS[N]Y   | 302    | WT | MTSPHFS[S]Y   | 72.54    | 9  | 9.18265   |
| Se051 | EP400 L2658V   | HLA-C*03:04 | MT | TATPD[V]VSM   | 37.68  | WT | TATPD[L]VSM   | 65.9     | 9  | 2.59841   |
| Se051 | EP400 L2658V   | HLA-B*07:02 | MT | SPATATPD[V]V  | 60.29  | WT | SPATATPD[L]V  | 217.66   | 10 | 2.59841   |
| Se051 | EP400 L2658V   | HLA-B*07:02 | MT | SPATATPD[V]V  | 63.04  | WT | SPATATPD[L]V  | 15.58    | 9  | 2.59841   |
| Se051 | EP400 L2658V   | HLA-C*03:04 | MT | ATATPD[V]VSM  | 164.78 | WT | ATATPD[L]VSM  | 234.64   | 10 | 2.59841   |
| Se051 | TFDP1 Q222E    | HLA-B*40:02 | MT | KQS[E]LQELIL  | 386.57 | WT | KQS[Q]LQELIL  | 417.82   | 10 | 47.94848  |
| Se051 | TFDP1 Q222E    | HLA-B*07:02 | MT | RIKQKQS[E]L   | 472.17 | WT | RIKQKQS[Q]L   | 679.41   | 9  | 47.94848  |
| Se051 | TP53 R116Q     | HLA-C*07:02 | MT | [Q]RPILTIITL  | 325.61 | WT | [R]RPILTIITL  | 156.92   | 10 | 31.19247  |
| Se051 | COASY L312M    | HLA-A*03:04 | MT | LA[M]YQIQLL   | 23.53  | WT | LA[L]YQIQLL   | 168.77   | 9  | 22.144    |
| Se051 | COASY L312M    | HLA-B*40:02 | MT | EELA[M]YQIQL  | 71.41  | WT | EELA[L]YQIQL  | 63.83    | 10 | 22.144    |
| Se051 | COASY L312M    | HLA-B*40:02 | MT | LENDLEELA[M]  | 159.61 | WT | LENDLEELA[L]  | 74.33    | 10 | 22.144    |
| Se051 | COASY L312M    | HLA-B*40:02 | MT | LEELA[M]YQI   | 187.49 | WT | LEELA[L]YQI   | 147.07   | 9  | 22.144    |
| Se051 | COASY L312M    | HLA-A*24:02 | MT | [M]YQIQLLKDL  | 223.72 | WT | [L]YQIQLLKDL  | 590.09   | 10 | 22.144    |
| Se051 | EPS15L1 T536M  | HLA-A*26:01 | MT | ETIIKSLKS[M]  | 29.11  | WT | ETIIKSLKS[T]  | 3749.81  | 10 | 3.57662   |
| Se051 | EPS15L1 T536M  | HLA-A*26:01 | MT | TIKSLKS[M]    | 330.21 | WT | TIKSLKS[T]    | 17102.98 | 9  | 3.57662   |
| Se051 | SIGLEC10 I476V | HLA-C*03:04 | MT | HGAQSGS[V]L   | 323.16 | WT | HGAQSGS[I]L   | 548.27   | 9  | 1.47468   |
| Se051 | SIGLEC10 I476V | HLA-C*03:04 | MT | GAQSGS[V]LQL  | 375.82 | WT | GAQSGS[I]LQL  | 462.97   | 10 | 1.47468   |
| Se051 | KIF3B V314A    | HLA-C*03:04 | MT | M[A]ANVGPASY  | 67.43  | WT | M[V]ANVGPASY  | 398.83   | 10 | 8.63399   |
| Se051 | KIF3B V314A    | HLA-A*26:01 | MT | M[A]ANVGPASY  | 285.7  | WT | M[V]ANVGPASY  | 32.36    | 10 | 8.63399   |
| Se051 | KIF3B V314A    | HLA-C*03:04 | MT | [A]ANVGPASY   | 375.59 | WT | [V]ANVGPASY   | 269.51   | 9  | 8.63399   |
| Se051 | PREX1 R198M    | HLA-B*40:02 | MT | IQ[M]JICKYPL  | 42.04  | WT | IQ[R]JICKYPL  | 356.88   | 9  | 6.08669   |
| Se051 | PREX1 R198M    | HLA-B*40:02 | MT | IQ[M]JICKYPLL | 99.46  | WT | IQ[R]JICKYPLL | 628.85   | 10 | 6.08669   |
| Se051 | PREX1 R198M    | HLA-A*24:02 | MT | GYLLSPIQ[R]I  | 120.26 | WT | GYLLSPIQ[R]I  | 107.04   | 10 | 6.08669   |
| Se051 | SYNJ1 R638T    | HLA-C*03:04 | MT | FI[T]PQHAPF   | 29.98  | WT | FI[R]PQHAPF   | 100.37   | 9  | 1.21154   |
| Se051 | SYNJ1 R638T    | HLA-A*24:02 | MT | VFI[T]PQHAPF  | 97.67  | WT | VFI[R]PQHAPF  | 65.67    | 10 | 1.21154   |
| Se051 | MYH9 L1449P    | HLA-B*40:02 | MT | KQKKFDPQ[P]L  | 320.38 | WT | KQKKFDPQ[L]L  | 524.43   | 9  | 108.60627 |
| Se051 | PLS3 H210D     | HLA-C*03:04 | MT | SAIGC[D]VVNI  | 240.83 | WT | SAIGC[H]VVNI  | 131.7    | 10 | 30.35613  |
| Se051 | PLS3 H210D     | HLA-C*03:04 | MT | SASAIGC[D]VV  | 380.21 | WT | SASAIGC[H]VV  | 236.37   | 10 | 30.35613  |
| Se051 | DKC1 R298W     | HLA-C*03:04 | MT | LTSHK[R]LVM   | 210.48 | WT | LTSHK[R]LVM   | 297.88   | 9  | 29.67798  |
| Se054 | STIL Q638K     | HLA-B*44:03 | MT | SEAL[K]KHSLF  | 394.31 | WT | SEAL[Q]KHSLF  | 173.89   | 10 | 5.45993   |
| Se054 | TXNIP V123L    | HLA-C*14:02 | MT | MFIPDGR[L]SV  | 70.93  | WT | MFIPDGR[V]SV  | 98.31    | 10 | 48.97169  |
| Se054 | TXNIP V123L    | HLA-C*14:03 | MT | MFIPDGR[L]SV  | 70.93  | WT | MFIPDGR[V]SV  | 98.31    | 10 | 48.97169  |
| Se054 | TXNIP V123L    | HLA-C*14:02 | MT | FIPDGR[L]SV   | 135.3  | WT | FIPDGR[V]SV   | 179.25   | 9  | 48.97169  |
| Se054 | TXNIP V123L    | HLA-C*14:03 | MT | FIPDGR[L]SV   | 135.3  | WT | FIPDGR[V]SV   | 179.25   | 9  | 48.97169  |
| Se054 | PREPL G298A    | HLA-A*33:03 | MT | H[A]VLYYVEHR  | 33.79  | WT | H[G]VLYYVEHR  | 316.75   | 10 | 22.79053  |
| Se054 | PREPL G298A    | HLA-A*33:03 | MT | [A]VLYYVEHR   | 170.86 | WT | [G]VLYYVEHR   | 211.17   | 9  | 22.79053  |
| Se054 | ITGB6 G80R     | HLA-A*33:03 | MT | TSNFRLGF[R]   | 13.24  | WT | TSNFRLGF[G]   | 16131.12 | 9  | 7.91764   |
| Se054 | ITGB6 G80R     | HLA-A*33:03 | MT | LTSNFRLGF[R]  | 21.85  | WT | LTSNFRLGF[G]  | 19042.85 | 10 | 7.91764   |
| Se054 | ITGB6 G80R     | HLA-C*14:02 | MT | NFRLGF[R]SF   | 295.53 | WT | NFRLGF[G]SF   | 582.55   | 9  | 7.91764   |
| Se054 | ITGB6 G80R     | HLA-C*14:03 | MT | NFRLGF[R]SF   | 295.53 | WT | NFRLGF[G]SF   | 582.55   | 9  | 7.91764   |
| Se054 | PHC3 N813S     | HLA-A*24:02 | MT | RY[S]VSCSKKF  | 86.42  | WT | RY[N]VSCSKKF  | 163.99   | 10 | 8.48229   |
| Se054 | PHC3 N813S     | HLA-C*14:02 | MT | RY[S]VSCSKKF  | 165.41 | WT | RY[N]VSCSKKF  | 125.12   | 10 | 8.48229   |
| Se054 | PHC3 N813S     | HLA-C*14:03 | MT | RY[S]VSCSKKF  | 165.41 | WT | RY[N]VSCSKKF  | 125.12   | 10 | 8.48229   |
| Se054 | CUL9 V1877L    | HLA-A*33:03 | MT | NLLSCLL[L]R   | 121.96 | WT | NLLSCLL[V]R   | 259.82   | 9  | 3.99361   |
| Se054 | DNAH11 R852S   | HLA-A*33:03 | MT | CVLPP[S]REHR  | 77.3   | WT | CVLPP[R]REHR  | 34.91    | 10 | 3.02078   |
| Se054 | DNAH11 R852S   | HLA-A*33:03 | MT | WARCVLPP[S]R  | 105.01 | WT | WARCVLPP[R]R  | 136.47   | 10 | 3.02078   |
| Se054 | LRWD1 T286I    | HLA-B*44:03 | MT | YEFQASQLL[I]  | 36.05  | WT | YEFQASQLL[T]  | 623.76   | 10 | 10.6289   |
| Se054 | FZD3 Q471E     | HLA-B*44:03 | MT | T[E]MSRPDLI   | 232.21 | WT | T[Q]MSRPDLI   | 7433.68  | 9  | 2.26413   |
| Se054 | FZD3 Q471E     | HLA-B*44:03 | MT | T[E]MSRPDLIL  | 314.28 | WT | T[Q]MSRPDLIL  | 8623.72  | 10 | 2.26413   |
| Se054 | CDK5RAP2 D881N | HLA-A*33:03 | MT | TVATEG[N]LLR  | 152.02 | WT | TVATEG[D]LLR  | 358.63   | 10 | 10.79124  |
| Se054 | VWF E581D      | HLA-C*14:02 | MT | RFS[D]EACAVL  | 112.94 | WT | RFS[E]EACAVL  | 109.4    | 10 | 6.42505   |
| Se054 | VWF E581D      | HLA-C*14:03 | MT | RFS[D]EACAVL  | 112.94 | WT | RFS[E]EACAVL  | 109.4    | 10 | 6.42505   |
| Se054 | SPINT1 V256L   | HLA-A*33:03 | MT | CLASNK[V]JGR  | 266.36 | WT | CLASNK[V]JGR  | 114.27   | 9  | 256.403   |
| Se054 | SPINT1 V256L   | HLA-A*33:03 | MT | [L]JGRCRGSFPR | 360.83 | WT | [V]JGRCRGSFPR | 432.26   | 10 | 256.403   |
| Se054 | ADAMTSL3 H424Y | HLA-C*14:02 | MT | [Y]NPWTACSV   | 118.35 | WT | [H]NPWTACSV   | 844.05   | 9  | 2.93597   |
| Se054 | ADAMTSL3 H424Y | HLA-C*14:03 | MT | [Y]NPWTACSV   | 118.35 | WT | [H]NPWTACSV   | 844.05   | 9  | 2.93597   |
| Se054 | ADAMTSL3 H424Y | HLA-C*14:02 | MT | E[Y]NPWTACSV  | 355.91 | WT | E[H]NPWTACSV  | 11220.12 | 10 | 2.93597   |
| Se054 | ADAMTSL3 H424Y | HLA-C*14:03 | MT | E[Y]NPWTACSV  | 355.91 | WT | E[H]NPWTACSV  | 11220.12 | 10 | 2.93597   |
| Se054 | ADAMTSL3 H424Y | HLA-C*14:02 | MT | HFQPLPRWE[Y]  | 367.3  | WT | HFQPLPRWE[H]  | 4289.13  | 10 | 2.93597   |
| Se054 | ADAMTSL3 H424Y | HLA-C*14:03 | MT | HFQPLPRWE[Y]  | 367.3  | WT | HFQPLPRWE[H]  | 4289.13  | 10 | 2.93597   |
| Se054 | CSNK2A2 N119S  | HLA-B*44:03 | MT | FEYIN[S]TDF   | 150.43 | WT | FEYIN[N]TDF   | 292.57   | 9  | 24.45501  |

|       |                 |             |    |               |        |    |               |          |    |          |
|-------|-----------------|-------------|----|---------------|--------|----|---------------|----------|----|----------|
| Se054 | KDM6B L173R     | HLA-B*44:03 | MT | [R]EQVWNLHL   | 376.05 | WT | [L]EQVWNLHL   | 485.18   | 10 | 2.48732  |
| Se054 | KDM6B L173R     | HLA-B*44:03 | MT | [R]EQVWNLH    | 459.36 | WT | [L]EQVWNLH    | 570.69   | 9  | 2.48732  |
| Se054 | P3H4 Q46L       | HLA-B*44:03 | MT | LE[L]YEGESW   | 55.2   | WT | LE[Q]YEGESW   | 92.48    | 9  | 5.03844  |
| Se054 | P3H4 Q46L       | HLA-C*14:02 | MT | AAYGHALE[L]   | 63.19  | WT | AAYGHALE[Q]   | 9350.54  | 9  | 5.03844  |
| Se054 | P3H4 Q46L       | HLA-C*14:03 | MT | AAYGHALE[L]   | 63.19  | WT | AAYGHALE[Q]   | 9350.54  | 9  | 5.03844  |
| Se054 | P3H4 Q46L       | HLA-A*33:03 | MT | E[L]YEGESWR   | 102.95 | WT | E[Q]YEGESWR   | 163.28   | 9  | 5.03844  |
| Se054 | P3H4 Q46L       | HLA-C*14:02 | MT | AAYGHALE[L]Y  | 305.24 | WT | AAYGHALE[Q]Y  | 588.21   | 10 | 5.03844  |
| Se054 | P3H4 Q46L       | HLA-C*14:03 | MT | AAYGHALE[L]Y  | 305.24 | WT | AAYGHALE[Q]Y  | 588.21   | 10 | 5.03844  |
| Se054 | P3H4 Q46L       | HLA-C*14:02 | MT | AAAYGHALE[L]  | 472.15 | WT | AAAYGHALE[Q]  | 21642.11 | 10 | 5.03844  |
| Se054 | P3H4 Q46L       | HLA-C*14:03 | MT | AAAYGHALE[L]  | 472.15 | WT | AAAYGHALE[Q]  | 21642.11 | 10 | 5.03844  |
| Se054 | LAMA3 S1494C    | HLA-C*14:02 | MT | [C]FNPGSNSM   | 39.01  | WT | [S]FNPGSNSM   | 15.29    | 9  | 72.32509 |
| Se054 | LAMA3 S1494C    | HLA-C*14:03 | MT | [C]FNPGSNSM   | 39.01  | WT | [S]FNPGSNSM   | 15.29    | 9  | 72.32509 |
| Se054 | DSG2 S351R      | HLA-A*33:03 | MT | DF[R]VIVANK   | 242.18 | WT | DF[S]VIVANK   | 203.97   | 9  | 55.98409 |
| Se054 | CPAMD8 P217H    | HLA-A*33:03 | MT | YILD[H]RGRSR  | 66.16  | WT | YILD[P]RGRSR  | 106.46   | 9  | 27.84162 |
| Se054 | CPAMD8 P217H    | HLA-C*14:02 | MT | YILD[H]RGRSRM | 138.05 | WT | YILD[P]RGRSRM | 171.51   | 10 | 27.84162 |
| Se054 | CPAMD8 P217H    | HLA-C*14:03 | MT | YILD[H]RGRSRM | 138.05 | WT | YILD[P]RGRSRM | 171.51   | 10 | 27.84162 |
| Se054 | BMP7 S13T       | HLA-A*24:02 | MT | [T]FVALWAPLF  | 34.5   | WT | [S]FVALWAPLF  | 30.38    | 10 | 2.8248   |
| Se054 | BMP7 S13T       | HLA-C*14:02 | MT | [T]FVALWAPL   | 80.1   | WT | [S]FVALWAPL   | 49.96    | 9  | 2.8248   |
| Se054 | BMP7 S13T       | HLA-C*14:03 | MT | [T]FVALWAPL   | 80.1   | WT | [S]FVALWAPL   | 49.96    | 9  | 2.8248   |
| Se054 | BMP7 S13T       | HLA-C*14:02 | MT | LRAAAPH[T]F   | 100.47 | WT | LRAAAPH[S]F   | 149.97   | 9  | 2.8248   |
| Se054 | BMP7 S13T       | HLA-C*14:03 | MT | LRAAAPH[T]F   | 100.47 | WT | LRAAAPH[S]F   | 149.97   | 9  | 2.8248   |
| Se054 | BMP7 S13T       | HLA-C*14:02 | MT | AAAPH[T]FVAL  | 136.75 | WT | AAAPH[S]FVAL  | 224.09   | 10 | 2.8248   |
| Se054 | BMP7 S13T       | HLA-C*14:03 | MT | AAAPH[T]FVAL  | 136.75 | WT | AAAPH[S]FVAL  | 224.09   | 10 | 2.8248   |
| Se054 | BMP7 S13T       | HLA-C*14:02 | MT | AAPH[T]FVAL   | 203.14 | WT | AAPH[S]FVAL   | 246.81   | 9  | 2.8248   |
| Se054 | BMP7 S13T       | HLA-C*14:03 | MT | AAPH[T]FVAL   | 203.14 | WT | AAPH[S]FVAL   | 246.81   | 9  | 2.8248   |
| Se054 | BMP7 S13T       | HLA-A*24:02 | MT | SLRAAAPH[T]F  | 217.91 | WT | SLRAAAPH[S]F  | 240.19   | 10 | 2.8248   |
| Se054 | BMP7 S13T       | HLA-C*14:03 | MT | SLRAAAPH[T]F  | 217.91 | WT | SLRAAAPH[S]F  | 240.19   | 10 | 2.8248   |
| Se054 | BMP7 S13T       | HLA-C*14:02 | MT | H[T]FVALWAPL  | 218.06 | WT | H[S]FVALWAPL  | 437.8    | 10 | 2.8248   |
| Se054 | BMP7 S13T       | HLA-C*14:03 | MT | H[T]FVALWAPL  | 218.06 | WT | H[S]FVALWAPL  | 437.8    | 10 | 2.8248   |
| Se054 | BMP7 S13T       | HLA-C*14:02 | MT | [T]FVALWAPLF  | 233.72 | WT | [S]FVALWAPLF  | 138.94   | 10 | 2.8248   |
| Se054 | BMP7 S13T       | HLA-C*14:03 | MT | [T]FVALWAPLF  | 233.72 | WT | [S]FVALWAPLF  | 138.94   | 10 | 2.8248   |
| Se054 | BMP7 S13T       | HLA-A*33:03 | MT | H[T]FVALWAPL  | 344    | WT | H[S]FVALWAPL  | 2060.5   | 10 | 2.8248   |
| Se054 | BMP7 S13T       | HLA-A*24:02 | MT | [T]FVALWAPL   | 473.25 | WT | [S]FVALWAPL   | 458.42   | 9  | 2.8248   |
| Se054 | TNRC6B R1319W   | HLA-A*24:02 | MT | T[W]GGSPYNQF  | 64.7   | WT | T[R]GGSPYNQF  | 12478.51 | 10 | 2.55301  |
| Se059 | COL9A2 Q489H    | HLA-A*31:01 | MT | [H]GYPGPPGPR  | 69.38  | WT | [Q]GYPGPPGPR  | 276.07   | 10 | 3.53544  |
| Se059 | HMCN1 S3553C    | HLA-B*40:02 | MT | LELTCIA[C]GI  | 63.93  | WT | LELTCIA[S]GI  | 63.12    | 10 | 1.88795  |
| Se059 | HMCN1 S3553C    | HLA-B*39:02 | MT | LELTCIA[C]GI  | 399.86 | WT | LELTCIA[S]GI  | 409.97   | 10 | 1.88795  |
| Se059 | HMCN1 S3553C    | HLA-A*31:01 | MT | IA[C]GIPAPK   | 423.23 | WT | IA[S]GIPAPK   | 710.66   | 9  | 1.88795  |
| Se059 | KIF21B R832W    | HLA-B*40:02 | MT | SE[W]VAGRAGL  | 13.92  | WT | SE[R]VAGRAGL  | 146.46   | 10 | 1.6182   |
| Se059 | KIF21B R832W    | HLA-B*39:02 | MT | SE[W]VAGRAGL  | 33.08  | WT | SE[R]VAGRAGL  | 1167.27  | 10 | 1.6182   |
| Se059 | KIF21B R832W    | HLA-A*31:01 | MT | PMSE[W]VAGR   | 351.99 | WT | PMSE[R]VAGR   | 426.86   | 9  | 1.6182   |
| Se059 | KIF21B R832W    | HLA-B*40:02 | MT | SE[W]VAGRAG   | 358.16 | WT | SE[R]VAGRAG   | 4754.44  | 9  | 1.6182   |
| Se059 | LYPD6B N133Y    | HLA-B*39:02 | MT | [Y]HTNAVFVAV  | 33.79  | WT | [N]HTNAVFVAV  | 136.03   | 9  | 21.1699  |
| Se059 | LYPD6B N133Y    | HLA-B*39:02 | MT | [Y]HTNAVFVAVM | 41.77  | WT | [N]HTNAVFVAVM | 170.28   | 10 | 21.1699  |
| Se059 | LYPD6B N133Y    | HLA-C*07:02 | MT | [Y]HTNAVFVAV  | 138.09 | WT | [N]HTNAVFVAV  | 2658.3   | 10 | 21.1699  |
| Se059 | LYPD6B N133Y    | HLA-C*03:04 | MT | [Y]HTNAVFVAVM | 204.76 | WT | [N]HTNAVFVAVM | 6339.25  | 10 | 21.1699  |
| Se059 | LYPD6B N133Y    | HLA-B*40:02 | MT | VELPT[Y]HTNA  | 232.07 | WT | VELPT[N]HTNA  | 468.23   | 10 | 21.1699  |
| Se059 | LYPD6B N133Y    | HLA-C*07:02 | MT | [Y]HTNAVFVAVM | 481.56 | WT | [N]HTNAVFVAVM | 4189.82  | 10 | 21.1699  |
| Se059 | DHX30 K846Q     | HLA-B*39:02 | MT | I[K]AVDEAVIL  | 40.42  | WT | I[J]AVDEAVIL  | 213.7    | 10 | 13.04975 |
| Se059 | DHX30 K846Q     | HLA-B*39:02 | MT | I[Q]AVDEAVI   | 119.7  | WT | I[K]AVDEAVI   | 815.48   | 9  | 13.04975 |
| Se059 | DHX30 K846Q     | HLA-C*03:04 | MT | [Q]AVDEAVILL  | 127.88 | WT | [K]AVDEAVILL  | 71.65    | 10 | 13.04975 |
| Se059 | DHX30 K846Q     | HLA-C*03:04 | MT | [Q]AVDEAVIL   | 173.9  | WT | [K]AVDEAVIL   | 80.65    | 9  | 13.04975 |
| Se059 | CLDN16 L90F     | HLA-C*03:04 | MT | FAFFSAGF[F]   | 16.81  | WT | FAFFSAGF[L]   | 7.27     | 9  | 2.50203  |
| Se059 | CLDN16 L90F     | HLA-C*03:04 | MT | FAFFSAGF[F]I  | 28.35  | WT | FAFFSAGF[L]I  | 21.97    | 10 | 2.50203  |
| Se059 | CLDN16 L90F     | HLA-B*39:02 | MT | FAFFSAGF[F]I  | 278.17 | WT | FAFFSAGF[L]I  | 160.16   | 10 | 2.50203  |
| Se059 | CLDN16 L90F     | HLA-B*39:02 | MT | FSAGF[F]IVA   | 493.77 | WT | FSAGF[L]IVA   | 1030.26  | 9  | 2.50203  |
| Se059 | ARSI S290R      | HLA-C*07:02 | MT | FYNN[R]VIIF   | 13.34  | WT | FYNN[S]VIIF   | 41.23    | 9  | 2.09585  |
| Se059 | ARSI S290R      | HLA-C*03:04 | MT | YGFYNN[R]VI   | 77.62  | WT | YGFYNN[S]VI   | 35.23    | 9  | 2.09585  |
| Se059 | ARSI S290R      | HLA-A*31:01 | MT | KRYGFYNN[R]   | 117.34 | WT | KRYGFYNN[S]   | 19052.15 | 9  | 2.09585  |
| Se059 | ARSI S290R      | HLA-B*39:02 | MT | YGFYNN[R]VII  | 141.97 | WT | YGFYNN[S]VII  | 117.6    | 10 | 2.09585  |
| Se059 | ARSI S290R      | HLA-C*03:04 | MT | YGFYNN[R]VII  | 145.47 | WT | YGFYNN[S]VII  | 74.63    | 10 | 2.09585  |
| Se059 | ARSI S290R      | HLA-B*39:02 | MT | YGFYNN[R]VI   | 157.15 | WT | YGFYNN[S]VI   | 96.71    | 9  | 2.09585  |
| Se059 | ARSI S290R      | HLA-C*07:02 | MT | GFYNN[R]VIIF  | 461.6  | WT | GFYNN[S]VIIF  | 959.45   | 10 | 2.09585  |
| Se059 | CASP8AP2 L1497V | HLA-B*40:02 | MT | SEQDIHLA[V]   | 18.61  | WT | SEQDIHLA[L]   | 10.85    | 9  | 1.23438  |
| Se059 | CASP8AP2 L1497V | HLA-B*39:02 | MT | SEQDIHLA[V]   | 46.6   | WT | SEQDIHLA[L]   | 12.86    | 9  | 1.23438  |
| Se059 | TSC22D4 L246F   | HLA-B*39:02 | MT | ME[F]GAPEEM   | 44.6   | WT | ME[L]GAPEEM   | 104.38   | 9  | 19.14947 |
| Se059 | TSC22D4 L246F   | HLA-B*40:02 | MT | ME[F]GAPEEM   | 61.62  | WT | ME[L]GAPEEM   | 124.61   | 9  | 19.14947 |
| Se059 | TSC22D4 L246F   | HLA-B*39:02 | MT | RME[F]GAPEEM  | 355.47 | WT | RME[L]GAPEEM  | 297.17   | 10 | 19.14947 |
| Se059 | ING3 F22L       | HLA-B*39:02 | MT | R[L]JTEMREMDL | 423.38 | WT | R[F]JTEMREMDL | 1461.34  | 10 | 2.49021  |
| Se059 | ERMP1 L817F     | HLA-C*03:04 | MT | WS[F]GNGTPV   | 13.94  | WT | WS[L]GNGTPV   | 35.2     | 9  | 3.08419  |
| Se059 | ERMP1 L817F     | HLA-B*39:02 | MT | WS[F]GNGTPV   | 78.87  | WT | WS[L]GNGTPV   | 224.83   | 9  | 3.08419  |
| Se059 | ERMP1 L817F     | HLA-B*39:02 | MT | SQWS[F]GNGT   | 145.14 | WT | SQWS[L]GNGT   | 313.11   | 9  | 3.08419  |
| Se059 | ERMP1 L817F     | HLA-B*39:02 | MT | SQWS[F]GNGTP  | 418.2  | WT | SQWS[L]GNGTP  | 620.2    | 10 | 3.08419  |
| Se059 | BNC2 C446Y      | HLA-A*31:01 | MT | RVFCNA[Y]GK   | 41.75  | WT | RVFCNA[C]GK   | 119.77   | 9  | 1.64304  |
| Se059 | ARHGAP21 K229Q  | HLA-B*39:02 | MT | [S]QJQQTSTPVL | 10.67  | WT | [K]JQQTSTPVL  | 60.57    | 10 | 7.2514   |
| Se059 | ARHGAP21 K229Q  | HLA-B*39:02 | MT | [S]QJQQTSTPVL | 20.21  | WT | [K]JQQTSTPVL  | 17.81    | 9  | 7.2514   |
| Se059 | ARHGAP21 K229Q  | HLA-B*39:02 | MT | [S]QJQQTSTPV  | 21.44  | WT | [K]JQQTSTPV   | 192.8    | 9  | 7.2514   |
| Se059 | ACBD5 L85V      | HLA-B*39:02 | MT | KQATEGPCK[V]  | 132.17 | WT | KQATEGPCK[L]  | 39.95    | 10 | 4.48287  |

|       |                 |             |    |               |        |    |               |          |    |          |
|-------|-----------------|-------------|----|---------------|--------|----|---------------|----------|----|----------|
| Se059 | ACBD5 L85V      | HLA-A*31:01 | MT | ATEGPCK[V]JSR | 485.96 | WT | ATEGPCK[L]JSR | 738.18   | 10 | 4.48287  |
| Se059 | TCF7L2 A148V    | HLA-A*31:01 | MT | SLQSRQ[V]LJK  | 260.57 | WT | SLQSRQ[A]LJK  | 322.95   | 9  | 4.18208  |
| Se059 | TCF7L2 A148V    | HLA-A*31:01 | MT | QSRQ[V]LKDAR  | 364.21 | WT | QSRQ[A]LKDAR  | 721.29   | 10 | 4.18208  |
| Se059 | CHST11 V107L    | HLA-C*03:04 | MT | LV[L]DEDHEL   | 356.67 | WT | LV[V]DEDHEL   | 201.88   | 9  | 24.47088 |
| Se059 | ARHGEF7 R651W   | HLA-C*03:04 | MT | FAS[W]JKSTAAL | 2.46   | WT | FAS[R]JKSTAAL | 3.32     | 10 | 1.87377  |
| Se059 | ARHGEF7 R651W   | HLA-B*39:02 | MT | FAS[W]KSTAAL  | 37.29  | WT | FAS[R]KSTAAL  | 98.48    | 10 | 1.87377  |
| Se059 | ARHGEF7 R651W   | HLA-C*03:04 | MT | FAS[W]KSTAA   | 55.9   | WT | FAS[R]KSTAA   | 136.71   | 9  | 1.87377  |
| Se059 | ARHGEF7 R651W   | HLA-C*03:04 | MT | AS[W]KSTAAL   | 80.21  | WT | AS[R]KSTAAL   | 297.13   | 9  | 1.87377  |
| Se059 | ARHGEF7 R651W   | HLA-B*39:02 | MT | AS[W]KSTAAL   | 115.55 | WT | AS[R]KSTAAL   | 1358.36  | 9  | 1.87377  |
| Se059 | ARHGEF7 R651W   | HLA-C*07:02 | MT | FAS[W]KSTAAL  | 341.41 | WT | FAS[R]KSTAAL  | 737.04   | 10 | 1.87377  |
| Se059 | ADCY4 A676P     | HLA-C*03:04 | MT | LVF[P]MAITSL  | 25.41  | WT | LVF[A]MAITSL  | 37.46    | 10 | 6.30885  |
| Se059 | ADCY4 A676P     | HLA-C*03:04 | MT | F[P]MAITSLF   | 45.87  | WT | F[A]MAITSLF   | 3.38     | 9  | 6.30885  |
| Se059 | ADCY4 A676P     | HLA-C*03:04 | MT | F[P]MAITSLFF  | 70.34  | WT | F[A]MAITSLFF  | 4.36     | 10 | 6.30885  |
| Se059 | ADCY4 A676P     | HLA-B*39:02 | MT | F[P]MAITSLF   | 108.58 | WT | F[A]MAITSLF   | 38.62    | 9  | 6.30885  |
| Se059 | ADCY4 A676P     | HLA-B*39:02 | MT | F[P]MAITSLFF  | 167.83 | WT | F[A]MAITSLFF  | 70.48    | 10 | 6.30885  |
| Se059 | ADCY4 A676P     | HLA-C*03:04 | MT | TATILLVF[P]M  | 168    | WT | TATILLVF[A]M  | 348.02   | 10 | 6.30885  |
| Se059 | ADCY4 A676P     | HLA-C*03:04 | MT | ATILLVF[P]M   | 289.14 | WT | ATILLVF[A]M   | 743.73   | 9  | 6.30885  |
| Se059 | ADCY4 A676P     | HLA-B*39:02 | MT | LVF[P]MAITSL  | 324.03 | WT | LVF[A]MAITSL  | 238.2    | 10 | 6.30885  |
| Se059 | ADCY4 A676P     | HLA-B*39:02 | MT | ATILLVF[P]M   | 418.22 | WT | ATILLVF[A]M   | 753.48   | 9  | 6.30885  |
| Se059 | ADCY4 A676P     | HLA-B*39:02 | MT | ILLVF[P]MAI   | 460.75 | WT | ILLVF[A]MAI   | 424.52   | 9  | 6.30885  |
| Se059 | TRIP11 E67D     | HLA-A*31:01 | MT | HAILRS[D]NER  | 230.82 | WT | HAILRS[E]NER  | 183.91   | 10 | 2.20242  |
| Se059 | TRIP11 E67D     | HLA-A*31:01 | MT | AILRS[D]NER   | 266.03 | WT | AILRS[E]NER   | 313.39   | 9  | 2.20242  |
| Se059 | CIITA L861M     | HLA-C*03:04 | MT | FS[M]DLRSTGI  | 27.39  | WT | FS[L]DLRSTGI  | 212.44   | 10 | 10.86415 |
| Se059 | CIITA L861M     | HLA-B*40:02 | MT | LEAAGQDFS[M]  | 112.61 | WT | LEAAGQDFS[L]  | 47.29    | 10 | 10.86415 |
| Se059 | CIITA L861M     | HLA-B*39:02 | MT | LEAAGQDFS[M]  | 173.2  | WT | LEAAGQDFS[L]  | 39.09    | 10 | 10.86415 |
| Se059 | CIITA L861M     | HLA-B*39:02 | MT | FS[M]DLRSTGI  | 265.16 | WT | FS[L]DLRSTGI  | 977.48   | 10 | 10.86415 |
| Se059 | MNT G534S       | HLA-B*39:02 | MT | QQVNGTA[S]L   | 11.51  | WT | QQVNGTA[G]L   | 25.21    | 9  | 3.398    |
| Se059 | MNT G534S       | HLA-B*39:02 | MT | HQQVNGTA[S]L  | 14.57  | WT | HQQVNGTA[G]L  | 28.41    | 10 | 3.398    |
| Se059 | MNT G534S       | HLA-C*03:04 | MT | TA[S]LGPPATV  | 101.18 | WT | TA[G]LGPPATV  | 862.93   | 10 | 3.398    |
| Se059 | MNT G534S       | HLA-C*03:04 | MT | A[S]LGPPATVM  | 141    | WT | A[G]LGPPATVM  | 928.11   | 10 | 3.398    |
| Se059 | MNT G534S       | HLA-C*03:04 | MT | QQVNGTA[S]L   | 313.08 | WT | QQVNGTA[G]L   | 2537.87  | 9  | 3.398    |
| Se059 | MNT G534S       | HLA-C*03:04 | MT | [S]LGPPATVM   | 487.53 | WT | [G]LGPPATVM   | 2150.84  | 9  | 3.398    |
| Se059 | TP53 M114V      | HLA-A*31:01 | MT | SSCMGG[V]NR   | 109.28 | WT | SSCMGG[M]NR   | 110.57   | 9  | 18.32025 |
| Se059 | TP53 M114V      | HLA-A*31:01 | MT | SSCMGG[V]NRR  | 167.87 | WT | SSCMGG[M]NRR  | 172.56   | 10 | 18.32025 |
| Se059 | SLC26A11 I271V  | HLA-B*40:02 | MT | FEVTGYQP[F]V  | 71.79  | WT | FEVTGYQP[F]I  | 41.12    | 10 | 6.52973  |
| Se059 | SLC26A11 I271V  | HLA-B*39:02 | MT | FEVTGYQP[F]V  | 267.03 | WT | FEVTGYQP[F]I  | 183.31   | 10 | 6.52973  |
| Se059 | KIAA1468 R867G  | HLA-B*39:02 | MT | WRLC[G]TFGKI  | 247.3  | WT | WRLC[R]TFGKI  | 428.48   | 10 | 3.23033  |
| Se059 | CDKN2D A37T     | HLA-B*40:02 | MT | RELVHPD[T]L   | 19.64  | WT | RELVHPD[A]L   | 18.42    | 9  | 4.69931  |
| Se059 | CDKN2D A37T     | HLA-B*39:02 | MT | RELVHPD[T]L   | 45.56  | WT | RELVHPD[A]L   | 41.03    | 9  | 4.69931  |
| Se059 | CDKN2D A37T     | HLA-B*39:02 | MT | HRELVHPD[T]L  | 142.84 | WT | HRELVHPD[A]L  | 152.45   | 10 | 4.69931  |
| Se059 | CDKN2D A37T     | HLA-A*31:01 | MT | LVHPD[T]LNR   | 333.23 | WT | LVHPD[A]LNR   | 470.17   | 9  | 4.69931  |
| Se059 | CILP2 R112H     | HLA-B*40:02 | MT | GE[H]VHLNPT   | 74.24  | WT | GE[R]VHLNPT   | 132.95   | 9  | 4.31929  |
| Se059 | CILP2 R112H     | HLA-C*03:04 | MT | SAVGE[H]VHL   | 138.9  | WT | SAVGE[R]VHL   | 299.54   | 9  | 4.31929  |
| Se059 | SLC1A5 A172G    | HLA-B*40:02 | MT | [G]JENAPSKEVL | 134.1  | WT | [A]JENAPSKEVL | 90.7     | 10 | 28.18228 |
| Se059 | SLC1A5 A172G    | HLA-B*39:02 | MT | [G]JENAPSKEVL | 245.03 | WT | [A]JENAPSKEVL | 161.41   | 10 | 28.18228 |
| Se059 | SLC1A5 A172G    | HLA-B*40:02 | MT | [G]JENAPSKEV  | 283.28 | WT | [A]JENAPSKEV  | 182.08   | 9  | 28.18228 |
| Se059 | SLC2A11 R2T     | HLA-A*31:01 | MT | [T]ALRRLIQGR  | 61.64  | WT | [R]ALRRLIQGR  | 10.82    | 10 | 4.50573  |
| Se060 | MOV10 Y180C     | HLA-C*12:02 | MT | FAF[C]NEDQEL  | 36.23  | WT | FAF[Y]NEDQEL  | 29.4     | 10 | 67.99836 |
| Se060 | FAM189B V81I    | HLA-C*12:02 | MT | FS[I]JGLTICA  | 372.55 | WT | FS[V]JGLTICA  | 649.44   | 10 | 9.32094  |
| Se060 | FAM189B V81I    | HLA-A*24:02 | MT | GFSNLLFS[I]   | 456.87 | WT | GFSNLLFS[V]   | 3946.92  | 9  | 9.32094  |
| Se060 | OBSCN P2494A    | HLA-C*12:02 | MT | R[A]APKAVQWY  | 332.26 | WT | R[P]APKAVQWY  | 8078.73  | 10 | 1.44977  |
| Se060 | YIPF4 L178V     | HLA-B*07:02 | MT | LP[V]JVIAPVL  | 198.07 | WT | LP[L]JVIAPVL  | 202.22   | 10 | 8.95584  |
| Se060 | YIPF4 L178V     | HLA-B*07:02 | MT | LP[V]JVIAPV   | 449.26 | WT | LP[L]JVIAPV   | 457.32   | 9  | 8.95584  |
| Se060 | BIRC6 E2160K    | HLA-B*07:02 | MT | LPMHRR[T]K]GV | 25.43  | WT | LPMHRR[T]E]GV | 25.01    | 10 | 1.46777  |
| Se060 | CCDC88A R882H   | HLA-A*24:02 | MT | IYKESC[V]HJL  | 110.71 | WT | IYKESC[R]JL   | 106.11   | 9  | 1.41071  |
| Se060 | DYSF R1572L     | HLA-A*24:02 | MT | IYIV[L]AFGL   | 137.68 | WT | IYIV[R]AFGL   | 91.86    | 9  | 2.15486  |
| Se060 | DYSF R1572L     | HLA-C*07:02 | MT | VRIYIV[L]JAF  | 349.01 | WT | VRIYIV[R]JAF  | 110.87   | 9  | 2.15486  |
| Se060 | ATG7 K350N      | HLA-C*12:02 | MT | FVDNA[N]ISY   | 229.57 | WT | FVDNA[K]ISY   | 455.92   | 9  | 1.9239   |
| Se060 | GOLGB1 A1991T   | HLA-C*12:02 | MT | ITKENLAQ[T]V  | 287.82 | WT | ITKENLAQ[A]V  | 288.15   | 10 | 4.07175  |
| Se060 | SH3RF1 G393R    | HLA-B*07:02 | MT | VPYQAAL[R]JTL | 15.62  | WT | VPYQAAL[G]JTL | 17.61    | 10 | 1.31781  |
| Se060 | SH3RF1 G393R    | HLA-A*24:02 | MT | PYQAAL[R]JTL  | 219.98 | WT | PYQAAL[G]JTL  | 274.47   | 9  | 1.31781  |
| Se060 | SH3RF1 G393R    | HLA-B*07:02 | MT | AL[R]JTLNPP   | 284.19 | WT | AL[G]JTLNPP   | 10002.77 | 9  | 1.31781  |
| Se060 | CFTR R1066C     | HLA-C*12:02 | MT | [R]AFGRQPYF   | 366.83 | WT | [R]AFGRQPYF   | 246.74   | 9  | 2.20801  |
| Se060 | MAF1 R120Q      | HLA-C*12:02 | MT | FS[Q]EPSLSWV  | 95.3   | WT | FS[R]EPSLSWV  | 44.81    | 10 | 74.51427 |
| Se060 | MAF1 R120Q      | HLA-C*12:02 | MT | FS[Q]EPSLSW   | 417.17 | WT | FS[R]EPSLSW   | 216.46   | 9  | 74.51427 |
| Se060 | JAK2 Y934H      | HLA-B*07:02 | MT | LP[H]GSLRDYL  | 30.26  | WT | LP[Y]GSLRDYL  | 43.53    | 10 | 3.00197  |
| Se060 | TMEM216 L65R    | HLA-A*24:02 | MT | [R]YLGIEVIRL  | 80.58  | WT | [L]YLGIEVIRL  | 435.66   | 10 | 19.28204 |
| Se060 | MYRF D427N      | HLA-B*07:02 | MT | KPL[D]CFYLYKL | 158.31 | WT | KPL[L]CFYLYKL | 242.75   | 10 | 1.84675  |
| Se060 | ARHGEF17 P1035L | HLA-B*07:02 | MT | MPLCLPAA[L]   | 21.2   | WT | MPLCLPAA[P]   | 5121.75  | 9  | 8.57067  |
| Se060 | ARHGEF17 P1035L | HLA-B*07:02 | MT | LPLAA[L]PSA   | 368.65 | WT | LPLAA[P]PSA   | 370.9    | 9  | 8.57067  |
| Se060 | RALGAP1 G934A   | HLA-C*12:02 | MT | FGFGTDT[A]V   | 105.23 | WT | FGFGTDT[G]V   | 321.7    | 9  | 1.3905   |
| Se060 | SEMA6D V21F     | HLA-C*12:02 | MT | [F]SFPEDDEPL  | 68.48  | WT | [V]SFPEDDEPL  | 1607.36  | 10 | 1.14016  |
| Se060 | FAM195A N138Y   | HLA-B*07:02 | MT | NPRLQ[N]FVPI  | 20.15  | WT | NPRLQ[N]FVPI  | 14.88    | 10 | 55.21244 |
| Se060 | FAM195A N138Y   | HLA-A*24:02 | MT | [Y]FVPIDLDEW  | 176.51 | WT | [N]FVPIDLDEW  | 1514.12  | 10 | 55.21244 |
| Se060 | FAM195A N138Y   | HLA-B*07:02 | MT | TPNPRLQ[Y]F   | 367.37 | WT | TPNPRLQ[N]F   | 359.17   | 9  | 55.21244 |
| Se060 | AMHD2 G9R       | HLA-B*07:02 | MT | AA[R]ARVLQF   | 293.22 | WT | AA[G]ARVLQF   | 8167.25  | 9  | 3.0718   |
| Se060 | ITGAX S357R     | HLA-C*12:02 | MT | MAQEGF[R]AV   | 78.03  | WT | MAQEGF[S]AV   | 50.53    | 9  | 2.65736  |
| Se060 | ITGAX S357R     | HLA-C*12:02 | MT | MAQEGF[R]AVF  | 96.22  | WT | MAQEGF[S]AVF  | 67.93    | 10 | 2.65736  |



|       |                |             |    |              |        |    |              |          |    |           |
|-------|----------------|-------------|----|--------------|--------|----|--------------|----------|----|-----------|
| Se060 | ITGAX S357R    | HLA-C*12:02 | MT | [R]AVFTPDGPV | 347.13 | WT | [S]AVFTPDGPV | 212.36   | 10 | 2.65736   |
| Se060 | DNMT1 P7T      | HLA-B*07:02 | MT | MPARTA[T]ARV | 26.35  | WT | MPARTA[P]ARV | 44.2     | 10 | 5.11625   |
| Se060 | DNMT1 P7T      | HLA-B*07:02 | MT | [T]ARVPTLAV  | 141.28 | WT | [P]ARVPTLAV  | 3888.84  | 9  | 5.11625   |
| Se060 | DNMT1 P7T      | HLA-C*12:02 | MT | [T]ARVPTLAV  | 200.13 | WT | [P]ARVPTLAV  | 4151.79  | 9  | 5.11625   |
| Se060 | DNMT1 P7T      | HLA-C*12:02 | MT | A[T]ARVPTLAV | 233.32 | WT | A[P]ARVPTLAV | 3635.73  | 10 | 5.11625   |
| Se060 | DNMT1 P7T      | HLA-B*07:02 | MT | RTA[T]ARVPTL | 237.57 | WT | RTA[P]ARVPTL | 188.43   | 10 | 5.11625   |
| Se060 | DNMT1 P7T      | HLA-C*12:02 | MT | RTA[T]ARVPTL | 342.33 | WT | RTA[P]ARVPTL | 135.95   | 10 | 5.11625   |
| Se060 | DNMT1 P7T      | HLA-C*12:02 | MT | TA[T]ARVPTL  | 441.51 | WT | TA[P]ARVPTL  | 448.47   | 9  | 5.11625   |
| Se060 | LYL1 G221V     | HLA-C*12:02 | MT | LAAGTPP[V]   | 52.34  | WT | LAAGTPP[G]   | 9035.84  | 9  | 6.54587   |
| Se060 | LYL1 G221V     | HLA-B*07:02 | MT | [V]PRKRPVHRV | 66.97  | WT | [G]PRKRPVHRV | 86.91    | 10 | 6.54587   |
| Se060 | LYL1 G221V     | HLA-B*07:02 | MT | TPP[V]PRKRPV | 299.41 | WT | TPP[G]PRKRPV | 279.67   | 10 | 6.54587   |
| Se060 | DTD1 D138Y     | HLA-A*24:02 | MT | N[Y]GPVTIEL  | 142.48 | WT | N[D]GPVTIEL  | 27311.73 | 9  | 12.62039  |
| Se060 | DTD1 D138Y     | HLA-C*07:02 | MT | N[Y]GPVTIEL  | 176.82 | WT | N[D]GPVTIEL  | 20531.4  | 9  | 12.62039  |
| Se060 | SIK1 D506E     | HLA-C*12:02 | MT | TSS[E]SCLTF  | 406.73 | WT | TSS[D]SCLTF  | 272.57   | 9  | 2.34966   |
| Se067 | CLDN19 V167L   | HLA-A*02:06 | MT | F[L]GWASAGL  | 20.35  | WT | F[V]GWASAGL  | 42.51    | 9  | 2.19453   |
| Se067 | CLDN19 V167L   | HLA-A*02:06 | MT | ALF[L]GWASA  | 45.82  | WT | ALF[V]GWASA  | 46.58    | 9  | 2.19453   |
| Se067 | CLDN19 V167L   | HLA-A*24:02 | MT | RYEFGPALF[L] | 76.75  | WT | RYEFGPALF[V] | 352.15   | 10 | 2.19453   |
| Se067 | CLDN19 V167L   | HLA-B*40:06 | MT | YEFGPALF[L]  | 107.86 | WT | YEFGPALF[V]  | 103.5    | 9  | 2.19453   |
| Se067 | CLDN19 V167L   | HLA-A*02:06 | MT | F[L]GWASAGLA | 147.11 | WT | F[V]GWASAGLA | 171.2    | 10 | 2.19453   |
| Se067 | CLDN19 V167L   | HLA-A*02:06 | MT | YEFGPALF[L]  | 201.72 | WT | YEFGPALF[V]  | 196.49   | 9  | 2.19453   |
| Se067 | CYP4B1 L8V     | HLA-A*02:06 | MT | FLS[V]SFSSL  | 35.34  | WT | FLS[L]SFSSL  | 54.45    | 9  | 1.13093   |
| Se067 | CYP4B1 L8V     | HLA-C*12:02 | MT | FLS[V]SFSSL  | 131.48 | WT | FLS[L]SFSSL  | 229.6    | 9  | 1.13093   |
| Se067 | CYP4B1 L8V     | HLA-A*24:02 | MT | SFLS[V]SFSSL | 161.34 | WT | SFLS[L]SFSSL | 249.81   | 10 | 1.13093   |
| Se067 | CYP4B1 L8V     | HLA-A*24:02 | MT | MVPSFSL[V]SF | 337.8  | WT | MVPSFSL[L]SF | 175.57   | 10 | 1.13093   |
| Se067 | CYP4B1 L8V     | HLA-C*12:02 | MT | LS[V]SFSSLGL | 474.64 | WT | LS[L]SFSSLGL | 1292.28  | 10 | 1.13093   |
| Se067 | CYP4B1 L8V     | HLA-C*12:02 | MT | MVPSFSL[V]SF | 487.64 | WT | MVPSFSL[L]SF | 431.44   | 10 | 1.13093   |
| Se067 | CMTM6 G114E    | HLA-A*02:06 | MT | YITLGT[E]CV  | 188.05 | WT | YITLGT[G]CV  | 564.86   | 9  | 139.59182 |
| Se067 | CMTM6 G114E    | HLA-A*02:06 | MT | ITLGT[E]CVFL | 339.62 | WT | ITLGT[G]CVFL | 185.69   | 10 | 139.59182 |
| Se067 | CMTM6 G114E    | HLA-A*02:06 | MT | TLGT[E]CVFLL | 470.3  | WT | TLGT[G]CVFLL | 332.77   | 10 | 139.59182 |
| Se067 | SCN5A F1604L   | HLA-A*24:02 | MT | KYFFSPTL[L]  | 28.98  | WT | KYFFSPTL[F]  | 6.89     | 9  | 1.17033   |
| Se067 | SCN5A F1604L   | HLA-A*02:06 | MT | FFSPTL[L]RV  | 264.03 | WT | FFSPTL[F]RV  | 50.95    | 9  | 1.17033   |
| Se067 | SCN5A F1604L   | HLA-A*02:06 | MT | YFFSPTL[L]RV | 265.61 | WT | YFFSPTL[F]RV | 73.49    | 10 | 1.17033   |
| Se067 | SCN5A F1604L   | HLA-C*12:02 | MT | YFFSPTL[L]RV | 331.07 | WT | YFFSPTL[F]RV | 436.76   | 10 | 1.17033   |
| Se067 | SCN5A F1604L   | HLA-C*12:02 | MT | FFSPTL[L]RV  | 494.75 | WT | FFSPTL[F]RV  | 667.06   | 9  | 1.17033   |
| Se067 | ITPR3 V1058M   | HLA-A*02:06 | MT | RMFLR[M]LIHL | 91.92  | WT | RMFLR[V]LIHL | 83.23    | 10 | 13.05938  |
| Se067 | ITPR3 V1058M   | HLA-C*12:02 | MT | FLR[M]LIHLTM | 431.14 | WT | FLR[V]LIHLTM | 668.55   | 10 | 13.05938  |
| Se067 | AIG1 P139T     | HLA-A*02:06 | MT | TVL[T]FILIEM | 282.58 | WT | TVL[P]FILIEM | 147.3    | 10 | 3.35581   |
| Se067 | AIG1 P139T     | HLA-A*02:06 | MT | TTVL[T]FILI  | 289.81 | WT | TTVL[P]FILI  | 239.81   | 9  | 3.35581   |
| Se067 | AIG1 P139T     | HLA-A*24:02 | MT | HGMHTTVL[T]F | 424.49 | WT | HGMHTTVL[P]F | 562.74   | 10 | 3.35581   |
| Se067 | AIG1 P139T     | HLA-A*02:06 | MT | GMHTTVL[T]FI | 453.3  | WT | GMHTTVL[P]FI | 206.88   | 10 | 3.35581   |
| Se067 | CCZ1B C184Y    | HLA-A*02:06 | MT | LQS[Y]DLLDI  | 437.99 | WT | LQS[C]DLLDI  | 399.82   | 9  | 40.63081  |
| Se067 | KMT2E P1832A   | HLA-C*12:02 | MT | S[A]VPGQIPI  | 227.5  | WT | S[P]VPGQIPI  | 4061.28  | 9  | 18.74468  |
| Se067 | KMT2E P1832A   | HLA-A*02:06 | MT | QQAS[A]VPGQI | 432.75 | WT | QQAS[P]VPGQI | 818.68   | 10 | 18.74468  |
| Se067 | ADAMTSL2 V478M | HLA-A*02:06 | MT | FTLNET[M]NSI | 17.42  | WT | FTLNET[V]NSI | 23.2     | 10 | 2.57697   |
| Se067 | ADAMTSL2 V478M | HLA-C*12:02 | MT | FTLNET[M]NSI | 88.44  | WT | FTLNET[V]NSI | 96.63    | 10 | 2.57697   |
| Se067 | ADAMTSL2 V478M | HLA-A*02:06 | MT | T[V]NSIFAQGA | 233.63 | WT | T[V]NSIFAQGA | 500.3    | 10 | 2.57697   |
| Se067 | ADAMTSL2 V478M | HLA-A*02:06 | MT | TLNET[M]NSI  | 233.89 | WT | TLNET[V]NSI  | 363.52   | 9  | 2.57697   |
| Se067 | PPP3CB L386V   | HLA-A*02:06 | MT | VLSICSDDE[V] | 363.55 | WT | VLSICSDDE[L] | 1914.16  | 10 | 27.64204  |
| Se067 | SIDT2 T311S    | HLA-A*02:06 | MT | FLSFYLL[S]V  | 4.68   | WT | FLSFYLL[T]V  | 6.28     | 9  | 7.05406   |
| Se067 | SIDT2 T311S    | HLA-A*02:06 | MT | FLSFYLL[S]VL | 34.54  | WT | FLSFYLL[T]VL | 31.74    | 10 | 7.05406   |
| Se067 | SIDT2 T311S    | HLA-A*02:06 | MT | YLL[S]VLLAC  | 211.69 | WT | YLL[T]VLLAC  | 535.9    | 9  | 7.05406   |
| Se067 | SIDT2 T311S    | HLA-C*12:02 | MT | FLSFYLL[S]VL | 289.84 | WT | FLSFYLL[T]VL | 301.99   | 10 | 7.05406   |
| Se067 | SIDT2 T311S    | HLA-C*12:02 | MT | LSFYLL[S]VL  | 333.39 | WT | LSFYLL[T]VL  | 425.65   | 9  | 7.05406   |
| Se067 | SIDT2 T311S    | HLA-A*02:06 | MT | IFLSFYLL[S]V | 376.16 | WT | IFLSFYLL[T]V | 424      | 10 | 7.05406   |
| Se067 | SIDT2 T311S    | HLA-C*12:02 | MT | FLSFYLL[S]V  | 380.18 | WT | FLSFYLL[T]V  | 336.21   | 9  | 7.05406   |
| Se067 | SIDT2 T311S    | HLA-C*12:02 | MT | LSFYLL[S]VLL | 499.84 | WT | LSFYLL[T]VLL | 476.46   | 10 | 7.05406   |
| Se067 | BHLHE41 K76E   | HLA-A*02:06 | MT | LLPEHL[E]LT  | 255.34 | WT | LLPEHL[K]LT  | 1569.6   | 9  | 13.63373  |
| Se067 | OPRL1 N21T     | HLA-A*24:02 | MT | IYGSHLQG[T]L | 240.58 | WT | IYGSHLQG[N]L | 399.78   | 10 | 3.70588   |
| Se067 | RRP1B D115N    | HLA-A*02:06 | MT | RL[N]KYYMLI  | 105.78 | WT | RL[D]KYYMLI  | 111.45   | 9  | 12.79159  |
| Se067 | RRP1B D115N    | HLA-A*24:02 | MT | RL[N]KYYMLI  | 379.64 | WT | RL[D]KYYMLI  | 1432.52  | 9  | 12.79159  |
| Se068 | CGN R845S      | HLA-A*31:01 | MT | K[S]LLDRTVDR | 67.34  | WT | K[R]LLDRTVDR | 4674.5   | 10 | 3.82611   |
| Se068 | CGN R845S      | HLA-A*31:01 | MT | [S]LLDRTVDR  | 128.41 | WT | [R]LLDRTVDR  | 28.5     | 9  | 3.82611   |
| Se068 | PKP4 G446D     | HLA-C*03:03 | MT | TALYRT[D]SV  | 257.79 | WT | TALYRT[G]SV  | 379.23   | 9  | 11.72097  |
| Se068 | TKT I274M      | HLA-C*03:03 | MT | MAEQIIQE[M]  | 71.19  | WT | MAEQIIQE[I]  | 443.42   | 9  | 65.03983  |
| Se068 | TKT I274M      | HLA-B*15:01 | MT | NMAEQIIQE[M] | 308.75 | WT | NMAEQIIQE[I] | 3668.94  | 10 | 65.03983  |
| Se068 | TKT I274M      | HLA-A*31:01 | MT | [M]YSQIQSKK  | 440.08 | WT | [I]YSQIQSKK  | 1159.58  | 9  | 65.03983  |
| Se068 | TKT I274M      | HLA-C*14:02 | MT | NMAEQIIQE[M] | 464.49 | WT | NMAEQIIQE[I] | 2488.07  | 10 | 65.03983  |
| Se068 | CPE S424L      | HLA-C*03:03 | MT | TA[L]APGYLAI | 76.3   | WT | TA[S]APGYLAI | 77.07    | 10 | 47.55003  |
| Se068 | CPE S424L      | HLA-C*03:03 | MT | LTA[L]APGYL  | 322.74 | WT | LTA[S]APGYL  | 168.48   | 9  | 47.55003  |
| Se068 | CPE S424L      | HLA-B*15:01 | MT | KLTA[L]APGY  | 381.77 | WT | KLTA[S]APGY  | 330.76   | 9  | 47.55003  |
| Se068 | C2 G169C       | HLA-A*31:01 | MT | KSNMG[C]SPK  | 53.24  | WT | KSNMG[G]SPK  | 134.19   | 9  | 37.10059  |
| Se068 | AIMP2 D74H     | HLA-C*03:03 | MT | AAV[H]GLSKM  | 70.04  | WT | AAV[D]GLSKM  | 39.12    | 9  | 11.8677   |
| Se068 | AIMP2 D74H     | HLA-C*03:03 | MT | KAAV[H]GLSKM | 78.2   | WT | KAAV[D]GLSKM | 137.47   | 10 | 11.8677   |
| Se068 | CYC1 K315N     | HLA-A*31:01 | MT | VL[N]SRKLAYR | 11.84  | WT | VL[K]SRKLAYR | 13.61    | 10 | 671.75962 |
| Se068 | CYC1 K315N     | HLA-A*31:01 | MT | L[N]SRKLAYR  | 35     | WT | L[K]SRKLAYR  | 682.54   | 9  | 671.75962 |
| Se068 | CYC1 K315N     | HLA-B*15:01 | MT | VL[N]SRKLAY  | 130.33 | WT | VL[K]SRKLAY  | 154.93   | 9  | 671.75962 |
| Se068 | CYC1 K315N     | HLA-A*31:01 | MT | RHKWSVL[N]SR | 159.29 | WT | RHKWSVL[K]SR | 370.7    | 10 | 671.75962 |
| Se068 | CYC1 K315N     | HLA-C*03:03 | MT | WSVL[N]SRKLL | 172.53 | WT | WSVL[K]SRKLL | 925.07   | 9  | 671.75962 |

|       |               |             |    |                |        |    |                |          |    |           |
|-------|---------------|-------------|----|----------------|--------|----|----------------|----------|----|-----------|
| Se068 | CYC1 K315N    | HLA-A*31:01 | MT | KWSVL[N]SRK    | 263.06 | WT | KWSVL[K]SRK    | 286.99   | 9  | 671.75962 |
| Se068 | SEC24C P621A  | HLA-C*03:03 | MT | FV[A]VIQAGM    | 49.88  | WT | FV[P]VIQAGM    | 218.87   | 9  | 11.53699  |
| Se068 | SEC24C P621A  | HLA-C*03:03 | MT | [A]VIQAGMEAL   | 65.4   | WT | [P]VIQAGMEAL   | 2630.52  | 10 | 11.53699  |
| Se068 | DLG4 R148Q    | HLA-B*15:01 | MT | R[Q]KPPAEKVM   | 290.73 | WT | R[R]KPPAEKVM   | 17262.83 | 10 | 1.52748   |
| Se068 | DLG4 R148Q    | HLA-A*31:01 | MT | VMR[Q]KPPAEK   | 354.36 | WT | VMR[R]KPPAEK   | 170.03   | 10 | 1.52748   |
| Se068 | DLG4 R148Q    | HLA-A*31:01 | MT | IVRLYVMR[Q]K   | 389.21 | WT | IVRLYVMR[R]K   | 477.11   | 10 | 1.52748   |
| Se068 | NLE1 R119H    | HLA-B*15:01 | MT | SL[H]GHVAAVY   | 17.63  | WT | SL[R]GHVAAVY   | 15.2     | 10 | 3.41471   |
| Se068 | NLE1 R119H    | HLA-A*24:20 | MT | KYLASL[H]GHV   | 212.77 | WT | KYLASL[R]GHV   | 785.86   | 10 | 3.41471   |
| Se068 | NLE1 R119H    | HLA-C*03:03 | MT | ASL[H]GHVAAV   | 383.61 | WT | ASL[R]GHVAAV   | 695.6    | 10 | 3.41471   |
| Se068 | NLE1 R119H    | HLA-C*14:02 | MT | SL[H]GHVAAV    | 389.4  | WT | SL[R]GHVAAV    | 470.66   | 9  | 3.41471   |
| Se068 | ZNF763 Y158C  | HLA-A*31:01 | MT | KAFR[C]HPSFR   | 4.48   | WT | KAFR[Y]HPSFR   | 4.21     | 10 | 2.30161   |
| Se068 | ZNF763 Y158C  | HLA-A*31:01 | MT | AFR[C]HPSFR    | 10.7   | WT | AFR[Y]HPSFR    | 8.57     | 9  | 2.30161   |
| Se068 | ZNF763 Y158C  | HLA-C*03:03 | MT | KAFR[C]HPSF    | 109.86 | WT | KAFR[Y]HPSF    | 165.21   | 9  | 2.30161   |
| Se068 | ZNF763 Y158C  | HLA-C*14:02 | MT | KAFR[C]HPSF    | 143    | WT | KAFR[Y]HPSF    | 167.64   | 9  | 2.30161   |
| Se068 | ZNF763 Y158C  | HLA-B*15:01 | MT | KAFR[C]HPSF    | 168.99 | WT | KAFR[Y]HPSF    | 177.45   | 9  | 2.30161   |
| Se068 | SPINT2 D29H   | HLA-A*31:01 | MT | GVLAA[H]RER    | 103.49 | WT | GVLAA[D]RER    | 769.45   | 9  | 266.82727 |
| Se068 | SPINT2 D29H   | HLA-A*31:01 | MT | LLSGVLA[A]HJR  | 139.35 | WT | LLSGVLA[A]DJR  | 1018.42  | 10 | 266.82727 |
| Se068 | SPINT2 D29H   | HLA-A*31:01 | MT | LSGVLA[A]HJR   | 227.56 | WT | LSGVLA[A]DJR   | 2464.8   | 9  | 266.82727 |
| Se068 | ZNF182 P4H    | HLA-B*15:01 | MT | MAK[H]QGLVTF   | 52.45  | WT | MAK[P]QGLVTF   | 44.33    | 10 | 2.16224   |
| Se068 | ZNF182 P4H    | HLA-C*03:03 | MT | MAK[H]QGLVTF   | 138.07 | WT | MAK[P]QGLVTF   | 82.72    | 10 | 2.16224   |
| Se068 | ZNF182 P4H    | HLA-C*14:02 | MT | MAK[H]QGLVTF   | 265.64 | WT | MAK[P]QGLVTF   | 168.21   | 10 | 2.16224   |
| Se071 | SPEG R1350C   | HLA-A*31:01 | MT | L[C]KGVQHIFR   | 219.63 | WT | L[R]KGVQHIFR   | 1026.19  | 10 | 1.09197   |
| Se071 | TNIK R1262T   | HLA-C*08:01 | MT | FMTLN[T]NSM    | 405.12 | WT | FMTLN[R]NSM    | 1345.85  | 9  | 2.85587   |
| Se071 | PIK3CA H1047R | HLA-A*31:01 | MT | FMKQMND[A]R    | 360.9  | WT | FMKQMND[A]H    | 18331.65 | 9  | 4.46232   |
| Se071 | KCNK5 S295Y   | HLA-A*31:01 | MT | NIFSFL[Y]KK    | 140.91 | WT | NIFSFL[S]KK    | 573.06   | 9  | 7.28467   |
| Se071 | KCNK5 S295Y   | HLA-A*31:01 | MT | VNIFSFL[Y]K    | 407.14 | WT | VNIFSFL[S]K    | 1593.86  | 9  | 7.28467   |
| Se071 | BTRC T391I    | HLA-A*31:01 | MT | [I]LRRVLVGH    | 34.35  | WT | [T]LRRVLVGH    | 31.14    | 10 | 2.25368   |
| Se071 | BTRC T391I    | HLA-A*31:01 | MT | MASPTD[I]JLR   | 80.87  | WT | MASPTD[I]TLR   | 62.99    | 10 | 2.25368   |
| Se071 | BTRC T391I    | HLA-C*08:01 | MT | MASPTD[I]JL    | 388.9  | WT | MASPTD[I]TL    | 212.91   | 9  | 2.25368   |
| Se071 | SYT13 R303C   | HLA-B*51:01 | MT | LPAAN[C]JLLV   | 355.97 | WT | LPAAN[R]JLLV   | 691.19   | 9  | 1.30138   |
| Se071 | SYT13 R303C   | HLA-B*51:01 | MT | LPAAN[C]JLLV   | 464.43 | WT | LPAAN[R]JLLV   | 649.32   | 10 | 1.30138   |
| Se071 | GPRC5B C267S  | HLA-C*08:01 | MT | FAL[S]FSCLL    | 186.56 | WT | FAL[C]FSCLL    | 329.41   | 9  | 6.56796   |
| Se071 | PPP2R1A P179R | HLA-A*31:01 | MT | [R]MVRRAAASK   | 51.59  | WT | [P]MVRRAAASK   | 4609.91  | 10 | 65.27311  |
| Se071 | PPP2R1A P179R | HLA-A*31:01 | MT | RNLCSDDT[R]    | 453.91 | WT | RNLCSDDT[P]    | 40536.17 | 9  | 65.27311  |
| Se071 | SLC4A11 G766R | HLA-A*31:01 | MT | TSLGASVLV[R]   | 287.17 | WT | TSLGASVLV[G]   | 33948.48 | 10 | 6.96152   |
| Se071 | SLC4A11 G766R | HLA-A*31:01 | MT | SLGASVLV[R]    | 409.28 | WT | SLGASVLV[G]    | 33996.02 | 9  | 6.96152   |
| Se071 | GAL3ST1 D128N | HLA-A*31:01 | MT | FARSLVQ[N]YR   | 40.16  | WT | FARSLVQ[D]YR   | 107.82   | 10 | 1.22958   |
| Se071 | PHKA2 T842R   | HLA-A*31:01 | MT | KVEVLA[E]AC[R] | 284.08 | WT | KVEVLA[E]AC[T] | 33682.49 | 10 | 4.22676   |
| Se101 | MRPL37 Y31C   | HLA-A*31:01 | MT | RGA[C]EJWGV    | 283.69 | WT | RGA[Y]EJWGV    | 219.11   | 9  | 91.30662  |
| Se101 | PHLDB2 S196L  | HLA-C*14:02 | MT | ISR[L]GAASM    | 411.45 | WT | ISR[S]GAASM    | 270.28   | 9  | 1.3349    |
| Se101 | SLC22A5 I146V | HLA-C*14:02 | MT | KAPL[T]VSLF    | 99.31  | WT | KAPL[T]ISLF    | 100.73   | 9  | 5.53418   |
| Se101 | SLC22A5 I146V | HLA-A*24:02 | MT | KAPL[T]VSLF    | 271.61 | WT | KAPL[T]ISLF    | 239.76   | 9  | 5.53418   |
| Se101 | SLC22A5 I146V | HLA-C*14:02 | MT | KAPL[T]VSLFF   | 288.47 | WT | KAPL[T]ISLFF   | 307.27   | 10 | 5.53418   |
| Se101 | SLC22A5 I146V | HLA-A*24:02 | MT | KAPL[T]VSLFF   | 361.61 | WT | KAPL[T]ISLFF   | 301.24   | 10 | 5.53418   |
| Se101 | UBE2J1 S9T    | HLA-C*14:02 | MT | RYNLK[T]PAV    | 43.25  | WT | RYNLK[S]PAV    | 65.36    | 9  | 15.24973  |
| Se101 | UBE2J1 S9T    | HLA-A*31:01 | MT | NLK[T]PAVKK    | 149.08 | WT | NLK[S]PAVKK    | 123      | 9  | 15.24973  |
| Se101 | UBE2J1 S9T    | HLA-A*31:01 | MT | RYNLK[T]PAVK   | 296.02 | WT | RYNLK[S]PAVK   | 337.33   | 10 | 15.24973  |
| Se101 | UBE2J1 S9T    | HLA-A*31:01 | MT | K[T]PAVKRLMK   | 458.57 | WT | K[S]PAVKRLMK   | 804.5    | 10 | 15.24973  |
| Se101 | THAP1 T138A   | HLA-A*31:01 | MT | [A]VEDTMHQR    | 443.96 | WT | [T]VEDTMHQR    | 573.32   | 9  | 3.98937   |
| Se101 | TF1 G121R     | HLA-A*31:01 | MT | KLKMYHSL[L]R   | 8.1    | WT | KLKMYHSL[L]G   | 4684.28  | 10 | 8.30465   |
| Se101 | TF1 G121R     | HLA-A*24:02 | MT | MYHSL[L]RNDW   | 72.82  | WT | MYHSL[L]GNDW   | 67.3     | 10 | 8.30465   |
| Se101 | TF1 G121R     | HLA-C*14:02 | MT | MYHSL[L]RNDW   | 417.65 | WT | MYHSL[L]GNDW   | 626.25   | 10 | 8.30465   |
| Se101 | BAD A78V      | HLA-A*31:01 | MT | RSRHSSYP[V]    | 450.16 | WT | RSRHSSYP[A]    | 653.81   | 9  | 28.20489  |
| Se101 | RBM23 L380V   | HLA-C*14:02 | MT | ALNPAA[V]TAL   | 213.3  | WT | ALNPAA[L]TAL   | 229.44   | 10 | 37.26113  |
| Se101 | RBM23 L380V   | HLA-C*14:02 | MT | LNPA[A]VJTAL   | 339.71 | WT | LNPA[A]LJTAL   | 484.98   | 9  | 37.26113  |
| Se101 | FANCM P936T   | HLA-A*24:02 | MT | SVSSNLF[L]TJF  | 170.07 | WT | SVSSNLF[L]PJF  | 288.42   | 10 | 1.61563   |
| Se101 | FANCM P936T   | HLA-C*14:02 | MT | SVSSNLF[L]TJF  | 217.12 | WT | SVSSNLF[L]PJF  | 162.25   | 10 | 1.61563   |
| Se101 | FANCM P936T   | HLA-A*24:02 | MT | VSSNLF[L]TJF   | 294.19 | WT | VSSNLF[L]PJF   | 578.41   | 9  | 1.61563   |
| Se101 | NDC80 K271T   | HLA-A*31:01 | MT | KLESLEA[T]NR   | 186.24 | WT | KLESLEA[K]NR   | 398.38   | 10 | 8.66641   |
| Se101 | GDF15 D136A   | HLA-A*31:01 | MT | RSW[A]VTRPLR   | 7.05   | WT | RSW[D]VTRPLR   | 10.64    | 10 | 10.77319  |
| Se101 | GDF15 D136A   | HLA-A*31:01 | MT | ASRSW[A]VTR    | 11.2   | WT | ASRSW[D]VTR    | 17.41    | 9  | 10.77319  |
| Se101 | GDF15 D136A   | HLA-A*31:01 | MT | SW[A]VTRPLR    | 39.88  | WT | SW[D]VTRPLR    | 263.09   | 9  | 10.77319  |
| Se101 | GDF15 D136A   | HLA-C*14:02 | MT | SRSW[A]VTRPL   | 69.28  | WT | SRSW[D]VTRPL   | 260.45   | 10 | 10.77319  |
| Se101 | GDF15 D136A   | HLA-A*31:01 | MT | SW[A]VTRPLRR   | 89.44  | WT | SW[D]VTRPLRR   | 732.16   | 10 | 10.77319  |
| Se101 | GDF15 D136A   | HLA-A*31:01 | MT | TASRSW[A]VTR   | 111.62 | WT | TASRSW[D]VTR   | 317.92   | 10 | 10.77319  |
| Se101 | GDF15 D136A   | HLA-C*14:02 | MT | RSW[A]VTRPL    | 116.46 | WT | RSW[D]VTRPL    | 161.42   | 9  | 10.77319  |
| Se101 | ZNF431 G16V   | HLA-A*31:01 | MT | AS[V]CPGAER    | 309.92 | WT | AS[G]CPGAER    | 457.04   | 9  | 3.95022   |
| Se101 | RBL1 S1013N   | HLA-A*31:01 | MT | [N]LKDINNMR    | 224.02 | WT | [S]LKDINNMR    | 49.58    | 10 | 1.91234   |
| Se101 | RBPJL L250H   | HLA-A*31:01 | MT | RQWAAFT[H]JHL  | 227.45 | WT | RQWAAFT[L]JHL  | 390.44   | 10 | 1.07054   |
| Se101 | RBPJL L250H   | HLA-A*24:02 | MT | QWAAFT[H]JHL   | 286.03 | WT | QWAAFT[L]JHL   | 536.25   | 9  | 1.07054   |
| Se101 | RBPJL L250H   | HLA-C*14:02 | MT | QWAAFT[H]JHL   | 345.71 | WT | QWAAFT[L]JHL   | 529.98   | 9  | 1.07054   |
| Se102 | MMEL1 L287F   | HLA-B*15:01 | MT | LQFMVSVAT[F]   | 6.32   | WT | LQFMVSVAT[L]   | 56.48    | 10 | 8.48644   |
| Se102 | MMEL1 L287F   | HLA-A*33:03 | MT | MVSVAT[F]LR    | 8.54   | WT | MVSVAT[L]LR    | 34.86    | 9  | 8.48644   |
| Se102 | MMEL1 L287F   | HLA-A*33:03 | MT | FMVSVAT[F]LR   | 18.68  | WT | FMVSVAT[L]LR   | 68.02    | 10 | 8.48644   |
| Se102 | MMEL1 L287F   | HLA-A*11:01 | MT | MVSVAT[F]LR    | 40.39  | WT | MVSVAT[L]LR    | 71.09    | 9  | 8.48644   |
| Se102 | MMEL1 L287F   | HLA-C*14:03 | MT | QFMVSVAT[F]    | 91.29  | WT | QFMVSVAT[L]    | 85.64    | 9  | 8.48644   |
| Se102 | MMEL1 L287F   | HLA-C*14:03 | MT | FMVSVAT[F]L    | 285.43 | WT | FMVSVAT[L]L    | 124.47   | 9  | 8.48644   |
| Se102 | MMEL1 L287F   | HLA-C*14:03 | MT | QFMVSVAT[F]L   | 318.23 | WT | QFMVSVAT[L]L   | 159.97   | 10 | 8.48644   |

|       |                 |             |    |               |        |    |               |          |    |           |
|-------|-----------------|-------------|----|---------------|--------|----|---------------|----------|----|-----------|
| Se102 | MMEL1 L287F     | HLA-A*33:03 | MT | [F]JLREDANLPR | 323.59 | WT | [L]JLREDANLPR | 640.07   | 10 | 8.48644   |
| Se102 | MMEL1 L287F     | HLA-B*15:01 | MT | FMVSVAT[F]L   | 396.63 | WT | FMVSVAT[L]L   | 379.32   | 9  | 8.48644   |
| Se102 | MMEL1 L287F     | HLA-B*15:01 | MT | QFMVSVAT[F]   | 404.99 | WT | QFMVSVAT[L]   | 5034.94  | 9  | 8.48644   |
| Se102 | OMA1 V299M      | HLA-B*15:01 | MT | F[M]LPNGQMF   | 20.45  | WT | F[V]LPNGQMF   | 286.38   | 9  | 9.20449   |
| Se102 | OMA1 V299M      | HLA-C*14:03 | MT | F[M]LPNGQMF   | 20.87  | WT | F[V]LPNGQMF   | 48.04    | 9  | 9.20449   |
| Se102 | OMA1 V299M      | HLA-B*15:01 | MT | [M]LPNGQMFV   | 80.63  | WT | [V]LPNGQMFV   | 383.16   | 10 | 9.20449   |
| Se102 | OMA1 V299M      | HLA-C*14:03 | MT | F[M]LPNGQMFV  | 179.03 | WT | F[V]LPNGQMFV  | 374      | 10 | 9.20449   |
| Se102 | OMA1 V299M      | HLA-C*14:03 | MT | AF[M]LPNGQMF  | 200.16 | WT | AF[V]LPNGQMF  | 656.51   | 10 | 9.20449   |
| Se102 | OMA1 V299M      | HLA-C*14:03 | MT | [M]LPNGQMFV   | 248.71 | WT | [V]LPNGQMFV   | 516.86   | 10 | 9.20449   |
| Se102 | OMA1 V299M      | HLA-C*14:03 | MT | AF[M]LPNGQM   | 375.34 | WT | AF[V]LPNGQM   | 1378.79  | 9  | 9.20449   |
| Se102 | PDE4B D225E     | HLA-B*15:01 | MT | YMMTLE[E]JHY  | 21.92  | WT | YMMTLE[D]JHY  | 35.8     | 9  | 2.17609   |
| Se102 | PDE4B D225E     | HLA-B*44:03 | MT | E[E]JHYHSDVAY | 154.46 | WT | E[D]JHYHSDVAY | 6854.76  | 10 | 2.17609   |
| Se102 | STRN W490G      | HLA-A*11:01 | MT | HTLKM[G]NLQK  | 29.24  | WT | HTLKM[W]NLQK  | 16.15    | 10 | 6.18643   |
| Se102 | STRN W490G      | HLA-A*11:01 | MT | TLKM[G]NLQK   | 121.42 | WT | TLKM[W]NLQK   | 68.43    | 9  | 6.18643   |
| Se102 | CNNM4 C151R     | HLA-A*33:03 | MT | ESMKLYAL[R]   | 13.01  | WT | ESMKLYAL[C]   | 11468.36 | 9  | 4.53153   |
| Se102 | CNNM4 C151R     | HLA-A*33:03 | MT | SMKLYAL[R]TR  | 82.35  | WT | SMKLYAL[C]TR  | 46.6     | 10 | 4.53153   |
| Se102 | WDR33 M423I     | HLA-C*14:03 | MT | RYNLNLLPG[I]  | 268.61 | WT | RYNLNLLPG[M]  | 48.93    | 10 | 8.98195   |
| Se102 | FN1 P1111T      | HLA-A*33:03 | MT | IVITWTPA[T]R  | 39.68  | WT | IVITWTPA[P]R  | 18.77    | 10 | 912.38619 |
| Se102 | FN1 P1111T      | HLA-A*11:01 | MT | WTPA[T]RIGFK  | 94.16  | WT | WTPA[P]RIGFK  | 83.23    | 10 | 912.38619 |
| Se102 | FN1 P1111T      | HLA-C*14:03 | MT | WTPA[T]RIGF   | 194.26 | WT | WTPA[P]RIGF   | 297      | 9  | 912.38619 |
| Se102 | FN1 P1111T      | HLA-C*14:03 | MT | TWTPA[T]RIGF  | 226.92 | WT | TWTPA[P]RIGF  | 282.26   | 10 | 912.38619 |
| Se102 | FN1 P1111T      | HLA-A*33:03 | MT | VITWTPA[T]R   | 236.28 | WT | VITWTPA[P]R   | 73.12    | 9  | 912.38619 |
| Se102 | FN1 P1111T      | HLA-A*11:01 | MT | IVITWTPA[T]R  | 266.33 | WT | IVITWTPA[P]R  | 114.7    | 10 | 912.38619 |
| Se102 | TRNT1 S269L     | HLA-C*14:03 | MT | F[L]PKPVTL    | 80.93  | WT | F[S]PKPVTL    | 78.14    | 9  | 7.68745   |
| Se102 | TRNT1 S269L     | HLA-A*11:01 | MT | KNVDGF[L]PK   | 107.03 | WT | KNVDGF[S]PK   | 165.13   | 9  | 7.68745   |
| Se102 | TRNT1 S269L     | HLA-C*14:03 | MT | GF[L]PKPVTL   | 197.11 | WT | GF[S]PKPVTL   | 233.66   | 9  | 7.68745   |
| Se102 | TRNT1 S269L     | HLA-C*14:03 | MT | GF[L]PKPVTL   | 365.26 | WT | GF[S]PKPVTL   | 327.32   | 10 | 7.68745   |
| Se102 | FLNB V1220L     | HLA-A*11:01 | MT | LVPHPAR[L]K   | 133.16 | WT | LVPHPAR[V]K   | 375.75   | 10 | 27.20684  |
| Se102 | FLNB V1220L     | HLA-C*14:03 | MT | LVPHPAR[L]Y   | 487.97 | WT | LVPHPAR[V]    | 1475.24  | 9  | 27.20684  |
| Se102 | PCCB R410W      | HLA-C*14:03 | MT | I[W]HGAKLLY   | 462.56 | WT | I[R]HGAKLLY   | 932.3    | 9  | 11.34848  |
| Se102 | PCCB R410W      | HLA-B*44:03 | MT | QEYGGI[W]H    | 465.64 | WT | QEYGGI[R]H    | 685.87   | 9  | 11.34848  |
| Se102 | IL1RAP S575T    | HLA-A*11:01 | MT | HVQRRR[T]RLK  | 339.56 | WT | HVQRRR[S]RLK  | 375.71   | 10 | 26.9323   |
| Se102 | LAP3 L511F      | HLA-A*11:01 | MT | RTLIEF[F]LR   | 57.22  | WT | RTLIEF[L]LR   | 68.53    | 9  | 131.15973 |
| Se102 | LAP3 L511F      | HLA-B*15:01 | MT | TLIEF[F]LRF   | 101.75 | WT | TLIEF[L]LRF   | 278.69   | 9  | 131.15973 |
| Se102 | LAP3 L511F      | HLA-A*33:03 | MT | RTLIEF[F]LR   | 110.75 | WT | RTLIEF[L]LR   | 549.51   | 9  | 131.15973 |
| Se102 | PCDHGB1 D662E   | HLA-C*14:03 | MT | IFA[E]SLQEV   | 149.56 | WT | IFA[D]SLQEV   | 129.98   | 10 | 25.84185  |
| Se102 | PCDHGB1 D662E   | HLA-C*14:03 | MT | IFA[E]SLQEV   | 200.17 | WT | IFA[D]SLQEV   | 177.16   | 9  | 25.84185  |
| Se102 | GCNT2 Q193K     | HLA-A*11:01 | MT | NTCG[Q]DFPLK  | 127.61 | WT | NTCG[Q]DFPLK  | 130.1    | 10 | 2.10085   |
| Se102 | GCNT2 Q193K     | HLA-B*15:01 | MT | YVINTCG[K]DF  | 310.62 | WT | YVINTCG[Q]DF  | 135.87   | 10 | 2.10085   |
| Se102 | GCNT2 Q193K     | HLA-C*14:03 | MT | YVINTCG[K]DF  | 461.49 | WT | YVINTCG[Q]DF  | 208.31   | 10 | 2.10085   |
| Se102 | MRPS10 S90T     | HLA-B*15:01 | MT | AVLD[T]YEYF   | 472.48 | WT | AVLD[S]YEYF   | 406.38   | 9  | 21.31108  |
| Se102 | MRPS10 S90T     | HLA-B*15:01 | MT | KAVLD[T]YEY   | 496.54 | WT | KAVLD[S]YEY   | 572.37   | 9  | 21.31108  |
| Se102 | ELFN1 Y379N     | HLA-C*14:03 | MT | FTLTNYT[N]CV  | 364.73 | WT | FTLTNYT[Y]CV  | 374.47   | 10 | 1.52588   |
| Se102 | FOKK1 A317V     | HLA-C*14:03 | MT | SYAQLIVQ[V]I  | 59.65  | WT | SYAQLIVQ[A]I  | 30.3     | 10 | 3.83402   |
| Se102 | FOKK1 A317V     | HLA-C*14:03 | MT | SYAQLIVQ[V]   | 91.96  | WT | SYAQLIVQ[A]   | 624.92   | 9  | 3.83402   |
| Se102 | TMEM130 S52R    | HLA-A*11:01 | MT | TISA[R]LVAK   | 19.77  | WT | TISA[S]LVAK   | 14.02    | 9  | 1.31612   |
| Se102 | TMEM130 S52R    | HLA-A*11:01 | MT | VTISA[R]LVAK  | 21.11  | WT | VTISA[S]LVAK  | 18.57    | 10 | 1.31612   |
| Se102 | TMEM130 S52R    | HLA-A*33:03 | MT | TGAVVTISA[R]  | 313.13 | WT | TGAVVTISA[S]  | 34274.39 | 10 | 1.31612   |
| Se102 | CDK5 L235R      | HLA-A*33:03 | MT | NL[R]KCNPVQR  | 142.04 | WT | NL[L]KCNPVQR  | 197.99   | 10 | 10.37303  |
| Se102 | SCRIB A1325V    | HLA-B*15:01 | MT | KQAYRAF[V]AV  | 383.6  | WT | KQAYRAF[A]AV  | 353.09   | 10 | 28.05909  |
| Se102 | CENPP E63Q      | HLA-A*33:03 | MT | HFFV[Q]WFEYR  | 4.43   | WT | HFFV[E]WFEYR  | 6.04     | 10 | 2.02449   |
| Se102 | CENPP E63Q      | HLA-A*33:03 | MT | FFV[Q]WFEYR   | 28.75  | WT | FFV[E]WFEYR   | 17.01    | 9  | 2.02449   |
| Se102 | CENPP E63Q      | HLA-A*11:01 | MT | FV[Q]WFEYRK   | 37.14  | WT | FV[E]WFEYRK   | 98.81    | 9  | 2.02449   |
| Se102 | CENPP E63Q      | HLA-A*33:03 | MT | FV[Q]WFEYRKR  | 81.54  | WT | FV[E]WFEYRKR  | 229.92   | 10 | 2.02449   |
| Se102 | CENPP E63Q      | HLA-C*14:03 | MT | [Q]WFEYRKRTF  | 162.55 | WT | [E]WFEYRKRTF  | 1131.99  | 10 | 2.02449   |
| Se102 | CENPP E63Q      | HLA-B*15:01 | MT | SLHFFV[Q]WF   | 171.27 | WT | SLHFFV[E]WF   | 332.78   | 9  | 2.02449   |
| Se102 | CENPP E63Q      | HLA-C*14:03 | MT | HFFV[Q]WFEY   | 332.21 | WT | HFFV[E]WFEY   | 391.49   | 9  | 2.02449   |
| Se102 | CENPP E63Q      | HLA-B*15:01 | MT | RSLHFFV[Q]WF  | 414    | WT | RSLHFFV[E]WF  | 619.46   | 10 | 2.02449   |
| Se102 | STXBP1 L582V    | HLA-A*11:01 | MT | LLDT[V]KKLNK  | 361.2  | WT | LLDT[L]KKLNK  | 430.25   | 10 | 5.94312   |
| Se102 | ST6GALNAC4 A19S | HLA-B*15:01 | MT | CSVVFS[S]JY   | 50.27  | WT | CSVVFS[A]JY   | 51.45    | 9  | 12.74461  |
| Se102 | ST6GALNAC4 A19S | HLA-C*14:03 | MT | VFS[S]JYILL   | 223.09 | WT | VFS[A]JYILL   | 358.15   | 9  | 12.74461  |
| Se102 | ST6GALNAC4 A19S | HLA-B*15:01 | MT | LCSVVFS[S]JY  | 470.81 | WT | LCSVVFS[A]JY  | 441.5    | 10 | 12.74461  |
| Se102 | ADAMTSL2 R221L  | HLA-A*11:01 | MT | CTHVVTGNY[L]K | 31.78  | WT | CTHVVTGNY[R]K | 60.97    | 10 | 3.27186   |
| Se102 | ADAMTSL2 R221L  | HLA-B*15:01 | MT | Y[L]KGNHLGY   | 54.36  | WT | Y[R]KGNHLGY   | 4683.41  | 10 | 3.27186   |
| Se102 | ADAMTSL2 R221L  | HLA-C*14:03 | MT | NY[L]KGNHL    | 169.71 | WT | NY[R]KGNHL    | 184.89   | 9  | 3.27186   |
| Se102 | ADAMTSL2 R221L  | HLA-C*14:03 | MT | Y[L]KGNHLGY   | 304.25 | WT | Y[R]KGNHLGY   | 457.79   | 10 | 3.27186   |
| Se102 | LCOR L354R      | HLA-B*44:03 | MT | SEI[R]JEEAISV | 291.62 | WT | SEI[L]JEEAISV | 301.65   | 10 | 1.24736   |
| Se102 | NSMCE4A R83P    | HLA-A*33:03 | MT | C[R]QIRHQYR   | 331.01 | WT | C[R]QIRHQYR   | 1448.43  | 9  | 12.64897  |
| Se102 | NSMCE4A R83P    | HLA-B*15:01 | MT | GLC[R]QIRHQY  | 366.79 | WT | GLC[L]QIRHQY  | 583.75   | 10 | 12.64897  |
| Se102 | LRRC32 I230N    | HLA-B*15:01 | MT | LSCNS[N]JEF   | 125.86 | WT | LSCNS[I]JEF   | 53.89    | 9  | 10.84726  |
| Se102 | FLII L64M       | HLA-A*33:03 | MT | E[M]JSSLPSL   | 13.95  | WT | E[L]JSSLPSL   | 39.84    | 9  | 27.61658  |
| Se102 | FLII L64M       | HLA-B*44:03 | MT | GE[M]JSSLPSL  | 63.71  | WT | GE[L]JSSLPSL  | 266.83   | 9  | 27.61658  |
| Se102 | GHDC Q376H      | HLA-C*14:03 | MT | AYN[Q]CPVVR   | 56.83  | WT | AYN[H]CPVVR   | 60.63    | 10 | 7.76857   |
| Se102 | GHDC Q376H      | HLA-A*33:03 | MT | GAYN[H]CPVVR  | 276.69 | WT | GAYN[Q]CPVVR  | 608.05   | 10 | 7.76857   |
| Se102 | GHDC Q376H      | HLA-C*14:03 | MT | YN[H]CPVVR    | 334.63 | WT | YN[Q]CPVVR    | 587.63   | 9  | 7.76857   |
| Se102 | GHDC Q376H      | HLA-A*11:01 | MT | GAYN[H]CPVVR  | 363.85 | WT | GAYN[Q]CPVVR  | 596.84   | 10 | 7.76857   |
| Se102 | GHDC Q376H      | HLA-A*33:03 | MT | [H]CPVVRFCR   | 391.62 | WT | [Q]CPVVRFCR   | 1751.09  | 10 | 7.76857   |
| Se102 | ZNF652 L538V    | HLA-A*33:03 | MT | MNPVST[V]PPR  | 115.96 | WT | MNPVST[L]PPR  | 167.69   | 10 | 1.7918    |

|       |                 |             |    |                |        |    |               |          |    |          |
|-------|-----------------|-------------|----|----------------|--------|----|---------------|----------|----|----------|
| Se102 | APBBP2 L26V     | HLA-A*33:03 | MT | SV[V]AYSFSR    | 13.29  | WT | SV[L]AYSFSR   | 12.64    | 9  | 5.56777  |
| Se102 | APBBP2 L26V     | HLA-A*11:01 | MT | SV[V]AYSFSR    | 18.54  | WT | SV[L]AYSFSR   | 17.31    | 9  | 5.56777  |
| Se102 | APBBP2 L26V     | HLA-A*33:03 | MT | SV[V]AYSFSRR   | 21.61  | WT | SV[L]AYSFSRR  | 19.91    | 10 | 5.56777  |
| Se102 | APBBP2 L26V     | HLA-A*11:01 | MT | SV[V]AYSFSRR   | 32.14  | WT | SV[L]AYSFSRR  | 29.63    | 10 | 5.56777  |
| Se102 | APBBP2 L26V     | HLA-A*33:03 | MT | V[V]AYSFSRR    | 44.27  | WT | V[L]AYSFSRR   | 135.77   | 9  | 5.56777  |
| Se102 | APBBP2 L26V     | HLA-B*15:01 | MT | KVASV[V]AYSF   | 48.75  | WT | KVASV[L]AYSF  | 56.2     | 10 | 5.56777  |
| Se102 | APBBP2 L26V     | HLA-A*11:01 | MT | V[V]AYSFSRR    | 72.35  | WT | V[L]AYSFSRR   | 232.11   | 9  | 5.56777  |
| Se102 | APBBP2 L26V     | HLA-B*15:01 | MT | GVKVASV[V]AY   | 79.07  | WT | GVKVASV[L]AY  | 82.6     | 10 | 5.56777  |
| Se102 | APBBP2 L26V     | HLA-A*11:01 | MT | ASV[V]AYSFSR   | 118.21 | WT | ASV[L]AYSFSR  | 90.69    | 10 | 5.56777  |
| Se102 | APBBP2 L26V     | HLA-A*33:03 | MT | ASV[V]AYSFSR   | 292.3  | WT | ASV[L]AYSFSR  | 270.81   | 10 | 5.56777  |
| Se102 | APBBP2 L26V     | HLA-B*15:01 | MT | VKVASV[V]AY    | 373.94 | WT | VKVASV[L]AY   | 305.33   | 9  | 5.56777  |
| Se102 | APBBP2 L26V     | HLA-B*15:01 | MT | VASV[V]AYSF    | 450.16 | WT | VASV[L]AYSF   | 387.77   | 9  | 5.56777  |
| Se102 | APBBP2 V25G     | HLA-B*15:01 | MT | KVAS[G]LAYSF   | 52.21  | WT | KVAS[V]LAYSF  | 56.2     | 10 | 5.56777  |
| Se102 | APBBP2 V25G     | HLA-B*15:01 | MT | GVKVAS[G]LAY   | 85.42  | WT | GVKVAS[V]LAY  | 82.6     | 10 | 5.56777  |
| Se102 | APBBP2 V25G     | HLA-A*11:01 | MT | S[G]LAYSFSR    | 150.21 | WT | S[V]LAYSFSR   | 17.31    | 9  | 5.56777  |
| Se102 | APBBP2 V25G     | HLA-A*11:01 | MT | AS[G]LAYSFRR   | 155.13 | WT | AS[V]LAYSFRR  | 90.69    | 10 | 5.56777  |
| Se102 | APBBP2 V25G     | HLA-A*33:03 | MT | S[G]LAYSFRR    | 208.61 | WT | S[V]LAYSFRR   | 12.64    | 9  | 5.56777  |
| Se102 | APBBP2 V25G     | HLA-A*33:03 | MT | [G]LAYSFRR     | 270.62 | WT | [V]LAYSFRR    | 135.77   | 9  | 5.56777  |
| Se102 | APBBP2 V25G     | HLA-B*15:01 | MT | VAS[G]LAYSF    | 294.84 | WT | VAS[V]LAYSF   | 387.77   | 9  | 5.56777  |
| Se102 | APBBP2 V25G     | HLA-A*11:01 | MT | S[G]LAYSFRR    | 337.4  | WT | S[V]LAYSFRR   | 29.63    | 10 | 5.56777  |
| Se102 | APBBP2 V25G     | HLA-A*11:01 | MT | [G]LAYSFRR     | 342.87 | WT | [V]LAYSFRR    | 232.11   | 9  | 5.56777  |
| Se102 | APBBP2 V25G     | HLA-B*15:01 | MT | VKVAS[G]LAY    | 351.33 | WT | VKVAS[V]LAY   | 305.33   | 9  | 5.56777  |
| Se102 | APBBP2 V25G     | HLA-A*33:03 | MT | S[G]LAYSFRR    | 371.17 | WT | S[V]LAYSFRR   | 19.91    | 10 | 5.56777  |
| Se102 | APBBP2 V25G     | HLA-C*14:03 | MT | KVAS[G]LAYSF   | 441.72 | WT | KVAS[V]LAYSF  | 675.31   | 10 | 5.56777  |
| Se102 | HELZ K500N      | HLA-C*14:03 | MT | [N]YAQNGQLF    | 52.82  | WT | [K]YAQNGQLF   | 17.26    | 9  | 2.82786  |
| Se102 | HELZ K500N      | HLA-B*15:01 | MT | LTGVSGGA[N]Y   | 411.83 | WT | LTGVSGGA[K]Y  | 783.58   | 10 | 2.82786  |
| Se102 | TMC6 R231P      | HLA-A*11:01 | MT | ALMPW[P]YALK   | 8.28   | WT | ALMPW[R]YALK  | 10.31    | 10 | 12.7561  |
| Se102 | TMC6 R231P      | HLA-C*14:03 | MT | ALMPW[P]YAL    | 47.15  | WT | ALMPW[R]YAL   | 66.48    | 9  | 12.7561  |
| Se102 | TMC6 R231P      | HLA-B*15:01 | MT | LQALMPW[P]Y    | 48.68  | WT | LQALMPW[R]Y   | 175.89   | 9  | 12.7561  |
| Se102 | TMC6 R231P      | HLA-A*11:01 | MT | LMPW[P]YALK    | 62.1   | WT | LMPW[R]YALK   | 111.17   | 9  | 12.7561  |
| Se102 | TMC6 R231P      | HLA-A*33:03 | MT | MPW[P]YALKR    | 165.5  | WT | MPW[R]YALKR   | 204.66   | 9  | 12.7561  |
| Se102 | TMC6 R231P      | HLA-B*15:01 | MT | ALQALMPW[P]Y   | 194.83 | WT | ALQALMPW[R]Y  | 541.43   | 10 | 12.7561  |
| Se102 | TMC6 R231P      | HLA-A*33:03 | MT | LMPW[P]YALKR   | 347.06 | WT | LMPW[R]YALKR  | 195.01   | 10 | 12.7561  |
| Se102 | TMC6 R231P      | HLA-B*15:01 | MT | ALMPW[P]YAL    | 367.99 | WT | ALMPW[R]YAL   | 340.33   | 9  | 12.7561  |
| Se102 | BRD4 E345Q      | HLA-A*11:01 | MT | SQQHPAP[Q]K    | 122.8  | WT | SQQHPAP[E]K   | 129.27   | 9  | 12.69856 |
| Se102 | RASAL3 R992L    | HLA-C*14:03 | MT | SLQLSPRT[L]    | 483.8  | WT | SLQLSPRT[R]   | 16228.28 | 9  | 1.61285  |
| Se102 | CHERP R559Q     | HLA-A*33:03 | MT | DFPP[Q]HPFER   | 189.19 | WT | DFPP[R]HPFER  | 85.73    | 10 | 17.80433 |
| Se102 | CENPB Q313H     | HLA-B*15:01 | MT | GLRHV[H]LAF    | 31.97  | WT | GLRHV[Q]LAF   | 31.71    | 9  | 51.81155 |
| Se102 | CENPB Q313H     | HLA-B*15:01 | MT | GLRHV[H]LAF    | 94.54  | WT | GLRHV[Q]LAF   | 100.17   | 10 | 51.81155 |
| Se102 | CENPB Q313H     | HLA-C*14:03 | MT | SGLRHV[H]LAF   | 414.93 | WT | SGLRHV[Q]LAF  | 679.62   | 10 | 51.81155 |
| Se103 | OBSCN E4387K    | HLA-B*44:03 | MT | SENA[K]VVFV    | 53.19  | WT | SENA[E]VVFV   | 19.11    | 9  | 2.77493  |
| Se103 | OBSCN E4387K    | HLA-A*11:01 | MT | [K]VVFVFNGLR   | 185.36 | WT | [E]VVFVFNGLR  | 2748.42  | 10 | 2.77493  |
| Se103 | OBSCN E4387K    | HLA-A*33:03 | MT | [K]VVFVFNGLR   | 315.58 | WT | [E]VVFVFNGLR  | 58.44    | 10 | 2.77493  |
| Se103 | HIBCH V158M     | HLA-A*11:01 | MT | GQFR[M]ATEK    | 72.85  | WT | GQFR[V]ATEK   | 57.68    | 9  | 20.7199  |
| Se103 | HIBCH V158M     | HLA-C*14:03 | MT | FR[M]ATEKCLF   | 178.31 | WT | FR[V]ATEKCLF  | 909.28   | 10 | 20.7199  |
| Se103 | HIBCH V158M     | HLA-C*14:03 | MT | [M]ATEKCLFAM   | 292.61 | WT | [V]ATEKCLFAM  | 839.5    | 10 | 20.7199  |
| Se103 | DOCK1 D344N     | HLA-B*44:03 | MT | DE[N]KQHFIFP   | 170.61 | WT | DE[D]KQHFIFP  | 1260.82  | 10 | 11.66788 |
| Se103 | PPFIA1 V178M    | HLA-C*14:03 | MT | K[M]RERLRVAL   | 109.91 | WT | K[V]RERLRVAL  | 230.54   | 10 | 10.48798 |
| Se103 | PPFIA1 V178M    | HLA-C*14:03 | MT | [M]RERLRVAL    | 351.21 | WT | [V]RERLRVAL   | 727.47   | 9  | 10.48798 |
| Se103 | ZNF200 I334M    | HLA-A*11:01 | MT | K[M]JFKCPECGK  | 46.45  | WT | K[I]JFKCPECGK | 38.32    | 10 | 2.73017  |
| Se103 | ZNF200 I334M    | HLA-A*11:01 | MT | GIHIREK[M]JFK  | 157.3  | WT | GIHIREK[I]JFK | 222.39   | 10 | 2.73017  |
| Se103 | ZNF200 I334M    | HLA-A*33:03 | MT | [M]JFKCPECGK   | 312.77 | WT | [I]JFKCPECGK  | 2257.52  | 9  | 2.73017  |
| Se103 | TP53 V41L       | HLA-A*33:03 | MT | V[L]JRRCPHHER  | 139.43 | WT | V[V]JRRCPHHER | 53.41    | 10 | 22.44744 |
| Se103 | TP53 V41L       | HLA-A*33:03 | MT | QSQHMTEV[L]R   | 471.56 | WT | QSQHMTEV[V]R  | 1188.53  | 10 | 22.44744 |
| Se103 | SIRT2 G104V     | HLA-C*14:03 | MT | LYP[V]QFKPTI   | 194.09 | WT | LYP[G]QFKPTI  | 141.28   | 10 | 15.68762 |
| Se103 | SIRT2 G104V     | HLA-C*08:01 | MT | FALAKELYP[V]   | 202.77 | WT | FALAKELYP[G]  | 16995.17 | 10 | 15.68762 |
| Se103 | SIRT2 G104V     | HLA-C*14:03 | MT | FALAKELYP[V]   | 391.2  | WT | FALAKELYP[G]  | 12169.61 | 10 | 15.68762 |
| Se104 | CPA1 A336T      | HLA-C*12:02 | MT | A[T]VTALASL    | 274.93 | WT | A[A]VTALASL   | 198.26   | 9  | 1.51475  |
| Se104 | CPA1 A336T      | HLA-C*12:02 | MT | LSKA[T]VTAL    | 332.33 | WT | LSKA[A]VTAL   | 240.59   | 9  | 1.51475  |
| Se104 | CPA1 A336T      | HLA-C*12:02 | MT | A[T]VTALASLY   | 479.72 | WT | A[A]VTALASLY  | 287.45   | 10 | 1.51475  |
| Se104 | LZTS2 G27R      | HLA-B*07:02 | MT | APVM[R]JSVSSL  | 5.39   | WT | APVM[G]JSVSSL | 6.57     | 10 | 23.13225 |
| Se104 | LZTS2 G27R      | HLA-B*07:02 | MT | APQAPVM[R]JSV  | 29.99  | WT | APQAPVM[G]JSV | 31.9     | 10 | 23.13225 |
| Se104 | LZTS2 G27R      | HLA-B*07:02 | MT | APVM[R]JSVSS   | 443.9  | WT | APVM[G]JSVSS  | 1081.76  | 9  | 23.13225 |
| Se104 | KIAA0556 R1029H | HLA-B*07:02 | MT | LPAYGKDP[R]HIV | 396.78 | WT | LPAYGKDP[R]V  | 302.11   | 10 | 6.24894  |
| Se104 | CLDN7 A94T      | HLA-C*12:02 | MT | L[T]MFVATMGM   | 91.09  | WT | L[A]MFVATMGM  | 32.59    | 10 | 35.25859 |
| Se104 | CLDN7 A94T      | HLA-C*12:02 | MT | FL[T]MFVATM    | 100.08 | WT | FL[A]MFVATM   | 40.75    | 9  | 35.25859 |
| Se104 | CLDN7 A94T      | HLA-C*12:02 | MT | [T]MFVATMGM    | 264.72 | WT | [A]MFVATMGM   | 386.47   | 9  | 35.25859 |
| Se104 | RRP1B R476W     | HLA-B*07:02 | MT | RP[W]JKKSPRA   | 129.73 | WT | RP[R]JKKSPRA  | 51.31    | 9  | 17.26816 |
| Se104 | RRP1B R476W     | HLA-B*07:02 | MT | RP[W]JKKSPRAH  | 197.26 | WT | RP[R]JKKSPRAH | 120.43   | 10 | 17.26816 |
| Se105 | SLAMF7 P93S     | HLA-C*12:02 | MT | [S]VSRNFSSPI   | 400.04 | WT | [P]VSRNFSSPI  | 9760.86  | 10 | 2.5408   |
| Se105 | SLAMF7 P93S     | HLA-C*14:02 | MT | TFICVARN[S]V   | 444.1  | WT | TFICVARN[P]V  | 247.58   | 10 | 2.5408   |
| Se105 | RBM34 V194F     | HLA-C*14:02 | MT | TVFVGNLP[F]    | 295.74 | WT | TVFVGNLP[V]   | 693.53   | 9  | 13.56689 |
| Se105 | RBM34 V194F     | HLA-C*12:02 | MT | TVFVGNLP[F]    | 400.12 | WT | TVFVGNLP[V]   | 174.09   | 9  | 13.56689 |
| Se105 | RBM34 V194F     | HLA-C*12:02 | MT | RTVFGNLP[F]    | 448.75 | WT | RTVFGNLP[V]   | 376.42   | 10 | 13.56689 |
| Se105 | PTCD1 E36D      | HLA-C*14:02 | MT | RWAGGR[D]GLM   | 274.74 | WT | RWAGGR[E]GLM  | 343.07   | 10 | 19.46356 |
| Se105 | TSSK6 G121S     | HLA-C*12:02 | MT | FAQIA[S]AVRY   | 151.81 | WT | FAQIA[G]AVRY  | 157.81   | 10 | 1.12867  |
| Se105 | TSSK6 G121S     | HLA-C*12:02 | MT | QIA[S]AVRYL    | 447.91 | WT | QIA[G]AVRYL   | 439.21   | 9  | 1.12867  |
| Se105 | TSSK6 G121S     | HLA-C*14:02 | MT | LFAQIA[S]AV    | 464.72 | WT | LFAQIA[G]AV   | 903.37   | 9  | 1.12867  |

|       |                |             |    |                |        |    |                |          |    |          |
|-------|----------------|-------------|----|----------------|--------|----|----------------|----------|----|----------|
| Se105 | SUPT5H D310N   | HLA-C*14:02 | MT | Y[N]RIKARMSL   | 139.85 | WT | Y[D]RIKARMSL   | 1683.12  | 10 | 46.15297 |
| Se105 | CAPN6 V134L    | HLA-C*14:02 | MT | FWHFGWE[TE][L] | 35.62  | WT | FWHFGWE[TE][V] | 166.6    | 10 | 2.61866  |
| Se105 | CAPN6 V134L    | HLA-C*12:02 | MT | [L][V]IDLLPTI  | 310.33 | WT | [V][V]IDLLPTI  | 476.28   | 10 | 2.61866  |
| Se108 | ALG14 E85Q     | HLA-A*11:01 | MT | KINSF[Q]LDR    | 135.66 | WT | KINSF[E]LDR    | 293.98   | 9  | 5.71582  |
| Se108 | ALG14 E85Q     | HLA-B*67:01 | MT | SANKINSF[Q]L   | 455.8  | WT | SANKINSF[E]L   | 255.86   | 10 | 5.71582  |
| Se108 | ALG14 E85Q     | HLA-C*15:02 | MT | SANKINSF[Q]L   | 466.43 | WT | SANKINSF[E]L   | 310.24   | 10 | 5.71582  |
| Se108 | POLR3C S538C   | HLA-A*02:01 | MT | FLLE[C]YIECT   | 10.56  | WT | FLLE[S]YIECT   | 10.59    | 10 | 14.28824 |
| Se108 | POLR3C S538C   | HLA-A*02:01 | MT | FLLE[C]YIEC    | 18.36  | WT | FLLE[S]YIEC    | 12.35    | 9  | 14.28824 |
| Se108 | POLR3C S538C   | HLA-B*40:01 | MT | LE[C]YIECTM    | 172.07 | WT | LE[S]YIECTM    | 47.58    | 9  | 14.28824 |
| Se108 | POLR3C S538C   | HLA-A*02:01 | MT | TIFLLE[C]YI    | 396.9  | WT | TIFLLE[S]YI    | 558.32   | 9  | 14.28824 |
| Se108 | MNDA F223L     | HLA-A*11:01 | MT | VVLKATAP[L]K   | 23.44  | WT | VVLKATAP[F]K   | 15.84    | 10 | 15.57865 |
| Se108 | MNDA F223L     | HLA-A*11:01 | MT | VLKATAP[L]K    | 71.63  | WT | VLKATAP[F]K    | 49.36    | 9  | 15.57865 |
| Se108 | MNDA F223L     | HLA-B*67:01 | MT | VVLKATAP[L]K   | 270.87 | WT | VVLKATAP[F]K   | 1393.57  | 9  | 15.57865 |
| Se108 | MNDA F223L     | HLA-A*02:01 | MT | VVLKATAP[L]K   | 361.49 | WT | VVLKATAP[F]K   | 10813.99 | 9  | 15.57865 |
| Se108 | EXO1 T396S     | HLA-B*40:01 | MT | KENPS[S]VGV    | 157.37 | WT | KENPS[T]VGV    | 229.78   | 9  | 2.1449   |
| Se108 | EXO1 T396S     | HLA-B*67:01 | MT | NPS[S]VGV      | 211.85 | WT | NPS[T]VGV      | 247.1    | 10 | 2.1449   |
| Se108 | WDR35 G151V    | HLA-A*11:01 | MT | SVDGNRIW[V]K   | 42.42  | WT | SVDGNRIW[G]K   | 53.97    | 10 | 3.24162  |
| Se108 | POLR1A G130A   | HLA-B*40:01 | MT | LEV[A]ALQAV    | 100.22 | WT | LEV[G]ALQAV    | 101.17   | 9  | 6.37549  |
| Se108 | POLR1A G130A   | HLA-A*02:01 | MT | VLEV[A]ALQAV   | 359.03 | WT | VLEV[G]ALQAV   | 355.1    | 10 | 6.37549  |
| Se108 | POLR1A G130A   | HLA-B*67:01 | MT | [A]ALQAVYEL    | 481.07 | WT | [G]ALQAVYEL    | 1021.4   | 9  | 6.37549  |
| Se108 | POLR1A G130A   | HLA-C*15:02 | MT | [A]ALQAVYEL    | 484.84 | WT | [G]ALQAVYEL    | 1187.13  | 9  | 6.37549  |
| Se108 | CD8B P108L     | HLA-A*02:01 | MT | FILNLT[SVK][P] | 45.89  | WT | FILNLT[SVK][P] | 11159.97 | 10 | 3.64116  |
| Se108 | CD8B P108L     | HLA-B*40:01 | MT | [L]JEDSGIYFCM  | 68.22  | WT | [P]JEDSGIYFCM  | 1438.9   | 10 | 3.64116  |
| Se108 | CD8B P108L     | HLA-A*02:01 | MT | ILNLT[SVK][L]  | 418.29 | WT | ILNLT[SVK][P]  | 19340.86 | 9  | 3.64116  |
| Se108 | PTPN23 Q762H   | HLA-C*15:02 | MT | TTVDSI[H]API   | 169.91 | WT | TTVDSI[Q]API   | 340.21   | 10 | 11.57448 |
| Se108 | PTPN23 Q762H   | HLA-C*15:02 | MT | TVDSI[H]API    | 485.73 | WT | TVDSI[Q]API    | 1403.87  | 9  | 11.57448 |
| Se108 | BCHE E559G     | HLA-C*07:02 | MT | SFFPKVL[G]M    | 174.04 | WT | SFFPKVL[E]M    | 42.19    | 9  | 3.05157  |
| Se108 | FYTTD1 S84R    | HLA-C*07:02 | MT | T[R]LNRRGRVM   | 125.22 | WT | T[S]LNRRGRVM   | 3086.96  | 10 | 15.78759 |
| Se108 | C5orf34 F362S  | HLA-A*11:01 | MT | YSGDGSV[F]K    | 230.54 | WT | YSGDGSV[F]K    | 51.9     | 9  | 2.81733  |
| Se108 | DDX56 R379W    | HLA-A*02:01 | MT | ILLPYQF[W]M    | 8.47   | WT | ILLPYQF[R]M    | 13.65    | 9  | 16.14379 |
| Se108 | DDX56 R379W    | HLA-B*67:01 | MT | LPYQF[W]MEEI   | 66.98  | WT | LPYQF[R]MEEI   | 58.29    | 10 | 16.14379 |
| Se108 | LAMB1 L421V    | HLA-C*15:02 | MT | YTD[STG][L]I   | 99.34  | WT | YTD[STG][L]I   | 75.67    | 9  | 48.40018 |
| Se108 | LAMB1 L421V    | HLA-A*11:01 | MT | G[L]JAGQCRCK   | 181.32 | WT | G[L]JAGQCRCK   | 538.33   | 10 | 48.40018 |
| Se108 | DLC1 I141T     | HLA-A*11:01 | MT | M[I]JQAGSLEK   | 35.25  | WT | M[I]JQAGSLEK   | 76.27    | 10 | 5.27259  |
| Se108 | DLC1 I141T     | HLA-A*11:01 | MT | [T]JQAGSLEK    | 202.53 | WT | [I]JQAGSLEK    | 338.25   | 9  | 5.27259  |
| Se108 | GOLGA2 S131P   | HLA-B*67:01 | MT | L[P]JQQLNGLV   | 192.72 | WT | L[S]JQQLNGLV   | 15014.48 | 9  | 29.05184 |
| Se108 | GOLGA2 S131P   | HLA-B*67:01 | MT | L[P]JQQLNGLVC  | 395.14 | WT | L[S]JQQLNGLVC  | 18297.21 | 10 | 29.05184 |
| Se108 | NUP214 V990I   | HLA-C*15:02 | MT | STSS[V]SQSL    | 242.93 | WT | STSS[V]SQSL    | 242.01   | 9  | 12.994   |
| Se108 | SEC61A2 G122V  | HLA-B*40:01 | MT | AEM[G]JAGICLL  | 7.43   | WT | AEM[G]JAGICLL  | 4.94     | 10 | 2.38095  |
| Se108 | SEC61A2 G122V  | HLA-B*40:01 | MT | AEM[V]JAGICL   | 9.56   | WT | AEM[G]JAGICL   | 5.74     | 9  | 2.38095  |
| Se108 | SEC61A2 G122V  | HLA-A*02:01 | MT | GMVGDPAEM[V]   | 19.26  | WT | GMVGDPAEM[G]   | 10273.31 | 10 | 2.38095  |
| Se108 | SEC61A2 G122V  | HLA-A*02:01 | MT | M[V]JAGICLLI   | 155.36 | WT | M[G]JAGICLLI   | 5716.15  | 9  | 2.38095  |
| Se108 | SEC61A2 G122V  | HLA-A*02:01 | MT | M[V]JAGICLLI   | 397.52 | WT | M[G]JAGICLLI   | 8664.52  | 10 | 2.38095  |
| Se108 | C10orf12 G594W | HLA-B*40:01 | MT | AEQEGEG[W]GI   | 44.92  | WT | AEQEGEG[G]GI   | 105.2    | 10 | 1.36275  |
| Se108 | C10orf12 G594W | HLA-B*40:01 | MT | QEGEG[W]GII    | 184.47 | WT | QEGEG[G]GII    | 182      | 9  | 1.36275  |
| Se108 | ABLIM1 G43E    | HLA-B*40:01 | MT | C[E]JEPCKGEVL  | 72.12  | WT | C[G]JEPCKGEVL  | 29149.02 | 10 | 29.54223 |
| Se108 | RGS10 S31T     | HLA-A*11:01 | MT | SSSSHQ[T]LK    | 17.56  | WT | SSSSHQ[S]LK    | 13.15    | 9  | 37.0914  |
| Se108 | RGS10 S31T     | HLA-A*11:01 | MT | SSSSHQ[T]LK    | 21.98  | WT | SSSSHQ[S]LK    | 17.15    | 10 | 37.0914  |
| Se108 | RGS10 S31T     | HLA-C*15:02 | MT | SSSSHQ[T]L     | 456.94 | WT | SSSSHQ[S]L     | 394.69   | 9  | 37.0914  |
| Se108 | DCHS1 T156R    | HLA-B*67:01 | MT | [R]AFGTRYPL    | 33.98  | WT | [T]AFGTRYPL    | 32.23    | 9  | 5.40251  |
| Se108 | DCHS1 T156R    | HLA-C*15:02 | MT | [R]AFGTRYPL    | 157.28 | WT | [T]AFGTRYPL    | 563.73   | 9  | 5.40251  |
| Se108 | DCHS1 T156R    | HLA-C*07:02 | MT | H[R]AFGTRYPL   | 216.64 | WT | H[T]AFGTRYPL   | 3300.12  | 10 | 5.40251  |
| Se108 | DCHS1 T156R    | HLA-B*67:01 | MT | H[R]AFGTRYPL   | 365.96 | WT | H[T]AFGTRYPL   | 99.13    | 10 | 5.40251  |
| Se108 | DGKZ R38W      | HLA-B*67:01 | MT | EPDKAP[W]RL    | 152.19 | WT | EPDKAP[R]RL    | 343.91   | 9  | 14.52037 |
| Se108 | C2CD3 A1021G   | HLA-A*02:01 | MT | GLAPLQ[G]TV    | 113.1  | WT | GLAPLQ[A]TV    | 13.83    | 9  | 4.75773  |
| Se108 | PLXNC1 A133P   | HLA-C*15:02 | MT | WTFDRG[P]CEV   | 91.08  | WT | WTFDRG[A]CEV   | 92.94    | 10 | 8.20446  |
| Se108 | PLXNC1 A133P   | HLA-A*02:01 | MT | WTFDRG[P]CEV   | 178.24 | WT | WTFDRG[A]CEV   | 193.36   | 10 | 8.20446  |
| Se108 | BRI3BP A74S    | HLA-A*02:01 | MT | FL[S]RLTERFV   | 18.6   | WT | FL[A]RLTERFV   | 12.36    | 10 | 6.78026  |
| Se108 | BRI3BP A74S    | HLA-C*15:02 | MT | RAAQKFL[S]JRL  | 142.55 | WT | RAAQKFL[A]JRL  | 144.16   | 10 | 6.78026  |
| Se108 | BRI3BP A74S    | HLA-C*07:02 | MT | [S]RLTERFV     | 239.87 | WT | [A]RLTERFV     | 656.7    | 9  | 6.78026  |
| Se108 | BRI3BP A74S    | HLA-A*11:01 | MT | RAAQKFL[S]R    | 247.97 | WT | RAAQKFL[A]R    | 270.54   | 9  | 6.78026  |
| Se108 | TRPM7 G317A    | HLA-B*40:01 | MT | CE[A]JTGRAADL  | 96.25  | WT | CE[G]JTGRAADL  | 426.65   | 10 | 8.23778  |
| Se108 | SCAPER V317I   | HLA-A*02:01 | MT | F[V]JGDGTSNTI  | 123.71 | WT | F[V]JGDGTSNTI  | 305.88   | 10 | 2.03094  |
| Se108 | IL16 G277V     | HLA-B*67:01 | MT | MA[V]LTHQDAL   | 72.06  | WT | MA[G]LTHQDAL   | 307.36   | 10 | 4.00243  |
| Se108 | IL16 G277V     | HLA-B*40:01 | MT | LELNGESMA[V]   | 118.87 | WT | LELNGESMA[G]   | 8119.47  | 10 | 4.00243  |
| Se108 | IL16 G277V     | HLA-A*11:01 | MT | [V]LTHQDALQK   | 285.51 | WT | [G]LTHQDALQK   | 469.3    | 10 | 4.00243  |
| Se108 | WDR81 K495E    | HLA-B*40:01 | MT | R[K]SVFFVQGL   | 12.76  | WT | R[K]SVFFVQGL   | 7024.12  | 10 | 5.65394  |
| Se108 | WDR81 K495E    | HLA-A*02:01 | MT | TQHR[E]SVFFV   | 180.85 | WT | TQHR[K]SVFFV   | 283.69   | 10 | 5.65394  |
| Se108 | WDR81 K495E    | HLA-C*07:02 | MT | VYTQHR[E]SVF   | 364.67 | WT | VYTQHR[K]SVF   | 313.64   | 10 | 5.65394  |
| Se108 | PITPNM3 R669W  | HLA-B*67:01 | MT | RP[R]JRLGVGV   | 66.33  | WT | RP[R]JRLGVGV   | 270.63   | 9  | 3.28331  |
| Se108 | PITPNM3 R669W  | HLA-A*11:01 | MT | ITYNVPRP[W]R   | 115.08 | WT | ITYNVPRP[R]R   | 151.82   | 10 | 3.28331  |
| Se108 | PITPNM3 R669W  | HLA-C*07:02 | MT | TYNVPRP[W]R    | 204.97 | WT | TYNVPRP[R]R    | 214.74   | 10 | 3.28331  |
| Se108 | PITPNM3 R669W  | HLA-C*07:02 | MT | YNVPRP[W]R     | 371.92 | WT | YNVPRP[R]R     | 273.82   | 9  | 3.28331  |
| Se108 | BCAS3 I743V    | HLA-B*67:01 | MT | HPSGQTTV[V]    | 23.48  | WT | HPSGQTTV[I]    | 29.33    | 9  | 4.79451  |
| Se108 | BCAS3 I743V    | HLA-C*15:02 | MT | TTV[V]JSSSSV   | 382.35 | WT | TTV[I]JSSSSV   | 448.44   | 10 | 4.79451  |
| Se108 | BCAS3 I743V    | HLA-B*67:01 | MT | HPSGQTTV[V]S   | 404.16 | WT | HPSGQTTV[I]S   | 508.5    | 10 | 4.79451  |
| Se108 | FOXS1 G315E    | HLA-B*67:01 | MT | YPL[E]JLTPCL   | 7.76   | WT | YPL[G]JLTPCL   | 6.91     | 9  | 2.38588  |
| Se108 | FOXS1 G315E    | HLA-B*67:01 | MT | YPL[E]JLTPCLY  | 432.56 | WT | YPL[G]JLTPCLY  | 380.17   | 10 | 2.38588  |

|       |               |             |    |               |        |    |               |          |    |          |
|-------|---------------|-------------|----|---------------|--------|----|---------------|----------|----|----------|
| Se108 | NCOA6 A855S   | HLA-C*15:02 | MT | MSFN[S]PFSGA  | 248.98 | WT | MSFN[A]PFSGA  | 230.43   | 10 | 7.20469  |
| Se108 | F8 P926T      | HLA-A*02:01 | MT | SLGP[T]SMPV   | 15.51  | WT | SLGP[P]SMPV   | 23.31    | 9  | 2.04326  |
| Se108 | F8 P926T      | HLA-C*15:02 | MT | SSLGP[T]SMPV  | 59.52  | WT | SSLGP[P]SMPV  | 54.5     | 10 | 2.04326  |
| Se109 | OBSN D2733N   | HLA-C*07:02 | MT | TRARVRVH[N]L  | 298.09 | WT | TRARVRVH[D]L  | 466.49   | 10 | 1.53967  |
| Se109 | NUP35 P267R   | HLA-C*03:04 | MT | LAFTP[R]IKTL  | 42.96  | WT | LAFTP[P]IKTL  | 24.77    | 10 | 7.46924  |
| Se109 | NUP35 P267R   | HLA-C*07:02 | MT | AFTP[R]IKTL   | 306.65 | WT | AFTP[P]IKTL   | 943.72   | 9  | 7.46924  |
| Se109 | STK36 V1042I  | HLA-C*03:04 | MT | SASPRTI[I]SF  | 38.7   | WT | SASPRTI[V]SF  | 29.27    | 10 | 6.07367  |
| Se109 | STK36 V1042I  | HLA-C*03:04 | MT | I[I]SFLSVAL   | 180.67 | WT | I[V]SFLSVAL   | 78.68    | 9  | 6.07367  |
| Se109 | STK36 V1042I  | HLA-C*03:04 | MT | TI[I]SFLSVAL  | 210.1  | WT | TI[V]SFLSVAL  | 261.56   | 10 | 6.07367  |
| Se109 | STK36 V1042I  | HLA-C*03:04 | MT | [I]SFLSVAL    | 282.29 | WT | [V]SFLSVAL    | 575.83   | 9  | 6.07367  |
| Se109 | COL6A6 L174M  | HLA-C*03:04 | MT | KASEEN[M]KAM  | 63.64  | WT | KASEEN[L]KAM  | 77.99    | 10 | 1.11695  |
| Se109 | TNIP1 P522R   | HLA-C*07:02 | MT | RYPPI[R]PMAM  | 25.84  | WT | RYPPI[P]PMAM  | 66.53    | 9  | 44.29428 |
| Se109 | TNIP1 P522R   | HLA-C*07:02 | MT | IRYPP[R]PMAM  | 27.59  | WT | IRYPP[P]PMAM  | 33.3     | 10 | 44.29428 |
| Se109 | TNIP1 P522R   | HLA-A*24:02 | MT | RYPPI[R]PMAM  | 152.11 | WT | RYPPI[P]PMAM  | 237.21   | 9  | 44.29428 |
| Se109 | TNIP1 P522R   | HLA-C*03:04 | MT | SQIRYPP[R]PM  | 357.1  | WT | SQIRYPP[P]PM  | 200.76   | 10 | 44.29428 |
| Se109 | ZNF292 L2484P | HLA-B*40:01 | MT | DEMDE[P]TEL   | 334.82 | WT | DEMDE[L]TEL   | 102.59   | 9  | 4.75951  |
| Se109 | ZNF292 L2484P | HLA-B*40:01 | MT | DEMDE[P]TEL   | 334.82 | WT | DEMDE[L]TEL   | 102.59   | 9  | 4.75951  |
| Se109 | ZNF292 L2484P | HLA-B*40:01 | MT | DEMDE[P]TEL   | 334.82 | WT | DEMDE[L]TEL   | 102.59   | 9  | 4.75951  |
| Se109 | LACE1 G450R   | HLA-C*03:04 | MT | FT[R]EEEIFAF  | 186.92 | WT | FT[G]EEEIFAF  | 961.36   | 10 | 1.34806  |
| Se109 | CRTC3 A32S    | HLA-B*40:01 | MT | AEETR[S]FEQL  | 108.39 | WT | AEETR[A]FEQL  | 79.45    | 10 | 4.88748  |
| Se109 | CRTC3 A32S    | HLA-B*40:01 | MT | AEETR[S]FEQL  | 108.39 | WT | AEETR[A]FEQL  | 79.45    | 10 | 4.88748  |
| Se109 | CRTC3 A32S    | HLA-B*40:01 | MT | AEETR[S]FEQL  | 108.39 | WT | AEETR[A]FEQL  | 79.45    | 10 | 4.88748  |
| Se109 | CRTC3 A32S    | HLA-B*40:01 | MT | EETR[S]FEQL   | 184.28 | WT | EETR[A]FEQL   | 166.75   | 9  | 4.88748  |
| Se109 | CRTC3 A32S    | HLA-B*40:01 | MT | EETR[S]FEQL   | 184.28 | WT | EETR[A]FEQL   | 166.75   | 9  | 4.88748  |
| Se109 | CRTC3 A32S    | HLA-B*40:01 | MT | EETR[S]FEQL   | 184.28 | WT | EETR[A]FEQL   | 166.75   | 9  | 4.88748  |
| Se109 | CRTC3 A32S    | HLA-C*03:04 | MT | R[S]FEQLMTDL  | 315.05 | WT | R[A]FEQLMTDL  | 39.02    | 10 | 4.88748  |
| Se109 | CILP2 V645M   | HLA-A*24:02 | MT | TYGMFS[M]JDL  | 201.64 | WT | TYGMFS[V]JDL  | 335.18   | 9  | 2.3453   |
| Se109 | CILP2 V645M   | HLA-C*03:04 | MT | RTYGMFS[M]JDL | 242.84 | WT | RTYGMFS[V]JDL | 264.85   | 10 | 2.3453   |
| Se109 | GDI1 G220V    | HLA-C*03:04 | MT | Y[V]KSPYLYPL  | 69.14  | WT | Y[G]KSPYLYPL  | 302.48   | 10 | 83.59188 |
| Se109 | GDI1 G220V    | HLA-C*07:02 | MT | ARY[V]KSPYL   | 75.69  | WT | ARY[G]KSPYL   | 51.22    | 9  | 83.59188 |
| Se109 | GDI1 G220V    | HLA-A*24:02 | MT | RY[V]KSPYLY   | 285.49 | WT | RY[G]KSPYLY   | 404.61   | 9  | 83.59188 |
| Se109 | GDI1 G220V    | HLA-C*07:02 | MT | ARY[V]KSPYLY  | 296.14 | WT | ARY[G]KSPYLY  | 188.88   | 10 | 83.59188 |
| Se109 | GDI1 G220V    | HLA-C*07:02 | MT | LYSESLARY[V]  | 349.52 | WT | LYSESLARY[G]  | 13953.64 | 10 | 83.59188 |
| Se109 | GDI1 G220V    | HLA-C*03:04 | MT | LARY[V]KSPYL  | 473.44 | WT | LARY[G]KSPYL  | 359.53   | 10 | 83.59188 |
| Se110 | KCNAB2 M106I  | HLA-C*12:02 | MT | [I]THVINOQM   | 402.33 | WT | [M]THVINOQM   | 170.12   | 9  | 3.63995  |
| Se110 | ZP3 P22H      | HLA-A*24:02 | MT | CY[H]QPLWLL   | 11.59  | WT | CY[P]QPLWLL   | 9.02     | 9  | 3.48888  |
| Se110 | ANK3 G167A    | HLA-C*12:02 | MT | Q[A]HDQVVSL   | 142.23 | WT | Q[G]HDQVVSL   | 2309.69  | 10 | 1.34215  |
| Se110 | ANK3 G167A    | HLA-C*12:02 | MT | Q[A]HDQVVSL   | 195.97 | WT | Q[G]HDQVVSL   | 3014.47  | 9  | 1.34215  |
| Se110 | ZBTB39 V87D   | HLA-C*12:02 | MT | LSF[D]YTSELF  | 20.85  | WT | LSF[V]YTSELF  | 67.77    | 9  | 2.58581  |
| Se110 | ZBTB39 V87D   | HLA-C*12:02 | MT | LSF[D]YTSELF  | 50.33  | WT | LSF[V]YTSELF  | 144.31   | 10 | 2.58581  |
| Se110 | ZBTB39 V87D   | HLA-A*24:02 | MT | SF[D]YTSELF   | 420.28 | WT | SF[V]YTSELF   | 42.21    | 9  | 2.58581  |
| Se110 | PAK4 R203P    | HLA-C*12:02 | MT | LAAG[P]PFNTY  | 104.6  | WT | LAAG[R]PFNTY  | 112.68   | 10 | 25.73503 |
| Se111 | SASS6 L262F   | HLA-B*40:06 | MT | KE[F]QDVGQSL  | 310.99 | WT | KE[L]QDVGQSL  | 582.4    | 10 | 1.36514  |
| Se111 | BOLA1 E41K    | HLA-A*02:01 | MT | KL[K]EALSPEV  | 11.49  | WT | KL[E]EALSPEV  | 9.41     | 10 | 21.60177 |
| Se111 | POLE4 F74I    | HLA-A*02:01 | MT | FILARAAEL[I]  | 73.58  | WT | FILARAAEL[F]  | 2839.8   | 10 | 52.18219 |
| Se111 | POLE4 F74I    | HLA-A*02:01 | MT | ILARAAEL[I]V  | 125.2  | WT | ILARAAEL[F]V  | 25.17    | 10 | 52.18219 |
| Se111 | POLE4 F74I    | HLA-A*02:01 | MT | ILARAAEL[I]   | 193.99 | WT | ILARAAEL[F]   | 6781.69  | 9  | 52.18219 |
| Se111 | PVRL3 M213V   | HLA-A*26:02 | MT | E[V]ESTTTSF   | 42.4   | WT | E[M]ESTTTSF   | 721.01   | 9  | 15.39236 |
| Se111 | PVRL3 M213V   | HLA-B*15:01 | MT | GE[V]ESTTTSF  | 209.01 | WT | GE[M]ESTTTSF  | 74.27    | 10 | 15.39236 |
| Se111 | TNS3 G785V    | HLA-A*02:01 | MT | SLGQYDND[A]V  | 297.19 | WT | SLGQYDND[A]G  | 30168.3  | 10 | 12.17396 |
| Se111 | DNAJB5 F174S  | HLA-B*15:01 | MT | ASF[S]GGSNPF  | 13.16  | WT | ASF[F]GGSNPF  | 15.77    | 10 | 11.20393 |
| Se111 | DNAJB5 F174S  | HLA-B*15:01 | MT | SF[S]GGSNPF   | 469.31 | WT | SF[F]GGSNPF   | 89.38    | 9  | 11.20393 |
| Se111 | GBA2 L526V    | HLA-B*15:01 | MT | FGY[L]EGQEY   | 233.68 | WT | FGY[L]EGQEY   | 403      | 9  | 20.56861 |
| Se111 | GBA2 L526V    | HLA-A*26:02 | MT | Y[V]EGQEYRMY  | 439.8  | WT | Y[L]EGQEYRMY  | 2404.88  | 10 | 20.56861 |
| Se111 | DIP2C G1027V  | HLA-A*02:01 | MT | HLQD[V]DHVAL  | 140.65 | WT | HLQD[G]DHVAL  | 192.7    | 10 | 1.48825  |
| Se111 | DIP2C G1027V  | HLA-A*02:01 | MT | LQD[V]DHVAL   | 200.39 | WT | LQD[G]DHVAL   | 84.24    | 10 | 1.48825  |
| Se111 | DIP2C G1027V  | HLA-A*26:02 | MT | D[V]DHVALVY   | 434.47 | WT | D[G]DHVALVY   | 11778.47 | 9  | 1.48825  |
| Se111 | EPS8 S481N    | HLA-A*02:01 | MT | RLSTEH[S]N    | 163.69 | WT | RLSTEH[S]V    | 148.95   | 9  | 5.03446  |
| Se111 | NOVA1 V197I   | HLA-A*02:01 | MT | NLQERV[I]TV   | 32.85  | WT | NLQERV[V]TV   | 49.86    | 9  | 1.87955  |
| Se111 | ETFA A25T     | HLA-A*02:01 | MT | KVAGI[T]KVLV  | 408.63 | WT | KVAGI[A]KVLV  | 610.21   | 10 | 24.74845 |
| Se111 | RABEP1 L729F  | HLA-A*02:01 | MT | QQLES[F]QEI   | 134.23 | WT | QQLES[L]QEI   | 85.34    | 9  | 5.06638  |
| Se111 | RTEL1 G516C   | HLA-A*02:01 | MT | RVYDNF[C]HV   | 10.91  | WT | RVYDNF[G]HV   | 83.27    | 9  | 2.75414  |
| Se111 | RTEL1 G516C   | HLA-A*02:01 | MT | RVYDNF[C]HVI  | 198.64 | WT | RVYDNF[G]HVI  | 570.56   | 10 | 2.75414  |
| Se111 | RTEL1 G516V   | HLA-A*02:01 | MT | RVYDNF[V]HV   | 11.73  | WT | RVYDNF[G]HV   | 83.27    | 9  | 2.75414  |
| Se111 | RTEL1 G516V   | HLA-A*02:01 | MT | RVYDNF[V]HVI  | 118.59 | WT | RVYDNF[G]HVI  | 570.56   | 10 | 2.75414  |
| Se111 | RTEL1 G516V   | HLA-C*07:02 | MT | RVYDNF[V]HV   | 437.8  | WT | RVYDNF[G]HV   | 1513.59  | 9  | 2.75414  |
| Se111 | RTEL1 G516V   | HLA-C*07:02 | MT | VYDNF[V]HVI   | 468.5  | WT | VYDNF[G]HVI   | 805.23   | 9  | 2.75414  |
| Se112 | SCNN1D S332T  | HLA-A*11:01 | MT | SLYNVNL[T]K   | 13.08  | WT | SLYNVNL[S]K   | 9.62     | 9  | 1.09682  |
| Se112 | ACP6 M132I    | HLA-A*33:03 | MT | Q[I]FALGERLR  | 73.87  | WT | Q[M]FALGERLR  | 46.11    | 10 | 4.44121  |
| Se112 | ACP6 M132I    | HLA-C*14:03 | MT | VGMQQ[I]FAL   | 390.55 | WT | VGMQQ[M]FAL   | 513.26   | 9  | 4.44121  |
| Se112 | ACP6 M132I    | HLA-A*33:03 | MT | MQQ[I]FALGER  | 459.91 | WT | MQQ[M]FALGER  | 236.25   | 10 | 4.44121  |
| Se112 | SV2A Q286H    | HLA-B*44:03 | MT | [H]EKRGHEHLSW | 74.55  | WT | [Q]EKRGHEHLSW | 98.21    | 10 | 1.59102  |
| Se112 | SV2A Q286H    | HLA-A*11:01 | MT | FSEFLA[H]EK   | 255.58 | WT | FSEFLA[Q]EK   | 1132.02  | 9  | 1.59102  |
| Se112 | SV2A Q286H    | HLA-C*14:03 | MT | SYFSEFLA[H]   | 309.05 | WT | SYFSEFLA[Q]   | 1223.59  | 9  | 1.59102  |
| Se112 | SV2A Q286H    | HLA-B*35:01 | MT | FSYFSEFLA[H]  | 324.45 | WT | FSYFSEFLA[Q]  | 3008.36  | 10 | 1.59102  |

|       |                |             |    |                       |        |    |                       |          |    |          |
|-------|----------------|-------------|----|-----------------------|--------|----|-----------------------|----------|----|----------|
| Se112 | SV2A Q286H     | HLA-A*11:01 | MT | YFSEFLA[H]JEK         | 325.78 | WT | YFSEFLA[Q]JEK         | 926.33   | 10 | 1.59102  |
| Se112 | PRRX1 N219K    | HLA-A*11:01 | MT | [K]MANSIANLR          | 103.04 | WT | [N]MANSIANLR          | 896.53   | 10 | 30.08311 |
| Se112 | PRRX1 N219K    | HLA-A*33:03 | MT | [K]MANSIANLR          | 183.45 | WT | [N]MANSIANLR          | 16.57    | 10 | 30.08311 |
| Se112 | PRRX1 N219K    | HLA-C*14:03 | MT | [K]MANSIANL           | 424.99 | WT | [N]MANSIANL           | 655.55   | 9  | 30.08311 |
| Se112 | ELK4 P409T     | HLA-C*14:03 | MT | VLNSHG[T]FTL          | 231.38 | WT | VLNSHG[P]FTL          | 269.2    | 10 | 2.02501  |
| Se112 | ELK4 P409T     | HLA-C*14:03 | MT | SVLNSHG[T]F           | 377.35 | WT | SVLNSHG[P]F           | 287.08   | 9  | 2.02501  |
| Se112 | MAPKAPK2 M314T | HLA-A*11:01 | MT | [T]TITEFMNH           | 181.65 | WT | [M]TITEFMNH           | 116.19   | 9  | 31.7864  |
| Se112 | RTKN M131I     | HLA-B*35:01 | MT | IPL[I]WKDTEY          | 12.23  | WT | IPL[M]WKDTEY          | 10.43    | 10 | 11.69512 |
| Se112 | RTKN M131I     | HLA-A*11:01 | MT | L[I]WKDTEYFK          | 46.52  | WT | L[M]WKDTEYFK          | 51.66    | 10 | 11.69512 |
| Se112 | RTKN M131I     | HLA-B*44:03 | MT | SDLRIPL[I]W           | 417.87 | WT | SDLRIPL[M]W           | 444.59   | 9  | 11.69512 |
| Se112 | LRR15 L438P    | HLA-B*35:01 | MT | W[P]LLNQPR            | 242.24 | WT | W[L]LLNQPR            | 12534.67 | 9  | 5.69404  |
| Se112 | LRR15 L438P    | HLA-A*33:03 | MT | RNW[P]LLNQPR          | 302.94 | WT | RNW[L]LLNQPR          | 296.29   | 10 | 5.69404  |
| Se112 | LRR15 L438P    | HLA-C*14:03 | MT | ILPLRNW[P]LL          | 344.66 | WT | ILPLRNW[L]LL          | 452.53   | 10 | 5.69404  |
| Se112 | LRR15 L438P    | HLA-C*14:03 | MT | NW[P]LLNQPR           | 391.41 | WT | NW[L]LLNQPR           | 1023.95  | 10 | 5.69404  |
| Se112 | LRR15 L438P    | HLA-C*14:03 | MT | ILPLRNW[P]L           | 438.34 | WT | ILPLRNW[L]L           | 914.7    | 9  | 5.69404  |
| Se112 | LRR15 L438P    | HLA-B*35:01 | MT | LPLRNW[P]LL           | 447.89 | WT | LPLRNW[L]LL           | 277.78   | 9  | 5.69404  |
| Se112 | UVSSA R683Q    | HLA-A*11:01 | MT | KVFAKAAV[Q]R          | 68.65  | WT | KVFAKAAV[R]R          | 66.71    | 10 | 2.04614  |
| Se112 | UVSSA R683Q    | HLA-A*33:03 | MT | KVFAKAAV[Q]R          | 96.11  | WT | KVFAKAAV[R]R          | 121.15   | 10 | 2.04614  |
| Se112 | UVSSA R683Q    | HLA-B*35:01 | MT | AAV[Q]RVVAAM          | 99.26  | WT | AAV[R]RVVAAM          | 264.82   | 10 | 2.04614  |
| Se112 | UVSSA R683Q    | HLA-A*33:03 | MT | VFAKAAV[Q]R           | 304.15 | WT | VFAKAAV[R]R           | 352.28   | 9  | 2.04614  |
| Se112 | UVSSA R683Q    | HLA-C*14:03 | MT | VFAKAAV[Q]RV          | 415.97 | WT | VFAKAAV[R]RV          | 405.19   | 10 | 2.04614  |
| Se112 | UVSSA R683Q    | HLA-C*14:03 | MT | AAV[Q]RVVAAM          | 425.03 | WT | AAV[R]RVVAAM          | 564.04   | 10 | 2.04614  |
| Se112 | FBXO4 C330S    | HLA-A*11:01 | MT | S[S]ISQGDVK           | 190.49 | WT | S[C]ISQGDVK           | 9653.9   | 9  | 2.36141  |
| Se112 | CHD1 R547T     | HLA-B*44:03 | MT | [T]EIQTWASQM          | 64.84  | WT | [R]EIQTWASQM          | 71.54    | 10 | 5.0271   |
| Se112 | PCDH12 R1175S  | HLA-A*11:01 | MT | KS[S]GSSSSSR          | 249.18 | WT | KS[R]GSSSSSR          | 1389.43  | 10 | 6.41542  |
| Se112 | PCDH12 R1175S  | HLA-A*11:01 | MT | S[S]GSSSSSR           | 340.39 | WT | S[R]GSSSSSR           | 25683.8  | 9  | 6.41542  |
| Se112 | ZNF354B C466F  | HLA-A*11:01 | MT | RIHTGEKP[F]K          | 125.18 | WT | RIHTGEKP[C]K          | 517.6    | 10 | 2.96867  |
| Se112 | ZNF354B C466F  | HLA-A*11:01 | MT | HTGEKP[F]KCK          | 293.64 | WT | HTGEKP[C]KCK          | 1037.91  | 10 | 2.96867  |
| Se112 | PKN3 C606W     | HLA-A*33:03 | MT | EIESLY[W]EKR          | 125    | WT | EIESLY[C]EKR          | 324.41   | 10 | 2.74625  |
| Se112 | PKN3 C606W     | HLA-C*14:03 | MT | Y[W]EKRILEAV          | 307.56 | WT | Y[C]EKRILEAV          | 6126.46  | 10 | 2.74625  |
| Se112 | SEC61A2 E210K  | HLA-A*33:03 | MT | RALR[K]AFYR           | 44.62  | WT | RALR[E]AFYR           | 149.85   | 9  | 2.12101  |
| Se112 | SEC61A2 E210K  | HLA-A*11:01 | MT | RALR[K]AFYR           | 50.87  | WT | RALR[E]AFYR           | 59.98    | 9  | 2.12101  |
| Se112 | SEC61A2 E210K  | HLA-A*11:01 | MT | RTDKVRALR[K]          | 107.54 | WT | RTDKVRALR[E]          | 15141.37 | 10 | 2.12101  |
| Se112 | ARL5B V42L     | HLA-C*14:03 | MT | LYQFLMNEV[L]          | 56.15  | WT | LYQFLMNEV[V]          | 231.77   | 10 | 4.67929  |
| Se112 | ARL5B V42L     | HLA-B*44:03 | MT | NEV[L]HTSPTI          | 236.8  | WT | NEV[V]HTSPTI          | 273.89   | 10 | 4.67929  |
| Se112 | PLCE1 G1960R   | HLA-A*33:03 | MT | LTKSTKQPR[R]          | 171.46 | WT | LTKSTKQPR[G]          | 34750.18 | 10 | 1.12215  |
| Se112 | PLCE1 G1960R   | HLA-C*14:03 | MT | [R]LTSPSPLL           | 480.33 | WT | [G]LTSPSPLL           | 2487.79  | 9  | 1.12215  |
| Se112 | RCN1 H202R     | HLA-A*33:03 | MT | FLHPPEEF[R]           | 260.58 | WT | FLHPPEEF[H]           | 22168.88 | 9  | 71.00507 |
| Se112 | TMEM126B L84F  | HLA-A*11:01 | MT | A[F]YSDNISK           | 123.76 | WT | A[L]YSDNISK           | 17.84    | 9  | 7.27629  |
| Se112 | MAML2 Q672E    | HLA-A*33:03 | MT | [E]SLPSQPLL           | 124.59 | WT | [Q]SLPSQPLL           | 519.7    | 10 | 6.40557  |
| Se112 | MAML2 Q672E    | HLA-B*44:03 | MT | A[E]SLPSQPL           | 276.72 | WT | A[Q]SLPSQPL           | 11053.78 | 9  | 6.40557  |
| Se112 | MAML2 Q672E    | HLA-B*44:03 | MT | A[E]SLPSQPLL          | 292.39 | WT | A[Q]SLPSQPLL          | 13173.39 | 10 | 6.40557  |
| Se112 | MANSC1 C100S   | HLA-B*35:01 | MT | [S]PNEEACPL           | 79.27  | WT | [C]PNEEACPL           | 284.47   | 9  | 7.67533  |
| Se112 | SPATS2 A275S   | HLA-C*14:03 | MT | KMKQAF[S]EL           | 150.97 | WT | KMKQAF[A]EL           | 176.82   | 9  | 7.93403  |
| Se112 | SLC16A7 F346Y  | HLA-B*35:01 | MT | YAV[Y]FGLGF           | 16.02  | WT | YAV[F]FGLGF           | 30.46    | 9  | 1.54399  |
| Se112 | SLC16A7 F346Y  | HLA-B*35:01 | MT | YTSLVLYAV[Y]          | 29.2   | WT | YTSLVLYAV[F]          | 124.95   | 10 | 1.54399  |
| Se112 | SLC16A7 F346Y  | HLA-C*14:03 | MT | V[Y]FGLGFGSV          | 135.11 | WT | V[F]FGLGFGSV          | 931.76   | 10 | 1.54399  |
| Se112 | SLC16A7 F346Y  | HLA-C*14:03 | MT | LYAV[Y]FGLGF          | 168.3  | WT | LYAV[F]FGLGF          | 241.14   | 10 | 1.54399  |
| Se112 | SLC16A7 F346Y  | HLA-C*14:03 | MT | YAV[Y]FGLGF           | 206.27 | WT | YAV[F]FGLGF           | 305.05   | 9  | 1.54399  |
| Se112 | SLC16A7 F346Y  | HLA-C*14:03 | MT | YTSLVLYAV[Y]          | 456.97 | WT | YTSLVLYAV[F]          | 257.52   | 10 | 1.54399  |
| Se112 | SLC16A7 F346Y  | HLA-B*35:01 | MT | TSLVLYAV[Y]           | 472.31 | WT | TSLVLYAV[F]           | 1983.24  | 9  | 1.54399  |
| Se112 | ANKRD13A V34M  | HLA-A*33:03 | MT | QN[M]EAVDPR           | 394.69 | WT | QN[V]EAVDPR           | 1312.79  | 9  | 12.50843 |
| Se112 | ARID4A N358T   | HLA-C*14:03 | MT | VYHQGGCD[T]I          | 72.03  | WT | VYHQGGCD[N]I          | 244.66   | 10 | 4.36436  |
| Se112 | ARID4A N358T   | HLA-A*11:01 | MT | [T]IDSGAVWK           | 114.15 | WT | [N]IDSGAVWK           | 694.56   | 9  | 4.36436  |
| Se112 | ZWILCH L148F   | HLA-B*35:01 | MT | EPRGP[ <i>I</i> ]NHLY | 179.79 | WT | EPRGP[ <i>L</i> ]NHLY | 198.89   | 10 | 5.08156  |
| Se112 | ZC3H18 R406W   | HLA-A*33:03 | MT | HNYRERE[W]JER         | 30.75  | WT | HNYRERE[R]JER         | 155.84   | 10 | 9.57578  |
| Se112 | ZC3H18 R406W   | HLA-A*33:03 | MT | NYRERE[W]JER          | 33.33  | WT | NYRERE[R]JER          | 662.93   | 9  | 9.57578  |
| Se112 | KDM6B P528R    | HLA-A*33:03 | MT | EGFLG[R]PASR          | 91.33  | WT | EGFLG[P]PASR          | 234.7    | 10 | 5.55802  |
| Se112 | KDM6B P528R    | HLA-A*33:03 | MT | GFLG[R]PASR           | 177.15 | WT | GFLG[P]PASR           | 368.31   | 9  | 5.55802  |
| Se112 | FLCN P404R     | HLA-A*11:01 | MT | RH[R]YSSQY            | 251.42 | WT | RH[P]YSSQY            | 215.94   | 9  | 11.97291 |
| Se112 | FLCN P404R     | HLA-C*14:03 | MT | [R]YSSQYEEAY          | 442.86 | WT | [P]YSSQYEEAY          | 7122.1   | 10 | 11.97291 |
| Se112 | TNFAIP1 F80V   | HLA-A*33:03 | MT | H[V]GTILNYLR          | 12.78  | WT | H[F]GTILNYLR          | 16.85    | 10 | 16.79562 |
| Se112 | TNFAIP1 F80V   | HLA-A*11:01 | MT | H[V]GTILNYLR          | 203.13 | WT | H[F]GTILNYLR          | 3683.99  | 10 | 16.79562 |
| Se112 | MYOM1 T395A    | HLA-B*35:01 | MT | MPLSFGV[A]PY          | 1.75   | WT | MPLSFGV[T]PY          | 1.85     | 10 | 1.04538  |
| Se112 | MYOM1 T395A    | HLA-B*35:01 | MT | MPLSFGV[A]P           | 73.62  | WT | MPLSFGV[T]P           | 162.04   | 9  | 1.04538  |
| Se112 | MYOM1 T395A    | HLA-A*33:03 | MT | GV[A]PYGYASR          | 82.53  | WT | GV[T]PYGYASR          | 139.76   | 10 | 1.04538  |
| Se112 | MYOM1 T395A    | HLA-B*35:01 | MT | LSFGV[A]PYGY          | 86.73  | WT | LSFGV[T]PYGY          | 66.83    | 10 | 1.04538  |
| Se112 | MYOM1 T395A    | HLA-B*35:01 | MT | [A]PYGYASRF           | 116.68 | WT | [T]PYGYASRF           | 27.67    | 9  | 1.04538  |
| Se112 | MYOM1 T395A    | HLA-A*11:01 | MT | GV[A]PYGYASR          | 151.89 | WT | GV[T]PYGYASR          | 598.43   | 10 | 1.04538  |
| Se112 | MYOM1 T395A    | HLA-C*14:03 | MT | V[A]PYGYASRF          | 277.05 | WT | V[T]PYGYASRF          | 385.11   | 10 | 1.04538  |
| Se112 | MYOM1 T395A    | HLA-A*33:03 | MT | V[A]PYGYASR           | 499.04 | WT | V[T]PYGYASR           | 322.65   | 9  | 1.04538  |
| Se112 | UBA52 I61M     | HLA-A*11:01 | MT | RTLSDDY[N]JQK         | 12.71  | WT | RTLSDDY[I]QK          | 17.15    | 10 | 104.4925 |
| Se112 | UBA52 I61M     | HLA-A*11:01 | MT | RTLSDDY[N]JQK         | 18.71  | WT | RTLSDDY[I]QK          | 23.2     | 9  | 104.4925 |
| Se112 | UBA52 I61M     | HLA-C*14:03 | MT | YN[M]JQKESTL          | 203.6  | WT | YN[I]JQKESTL          | 660.18   | 9  | 104.4925 |
| Se112 | PRR12 T1192M   | HLA-A*11:01 | MT | AS[M]PTDGAKK          | 43.75  | WT | AS[T]PTDGAKK          | 550.68   | 10 | 6.35469  |
| Se112 | PRR12 T1192M   | HLA-A*11:01 | MT | AS[M]PTDGAK           | 54.78  | WT | AS[T]PTDGAK           | 715.13   | 9  | 6.35469  |
| Se112 | PRR12 T1192M   | HLA-B*35:01 | MT | TAGPASAS[M]           | 116.34 | WT | TAGPASAS[T]           | 13650.84 | 9  | 6.35469  |
| Se112 | PRR12 T1192M   | HLA-A*11:01 | MT | SAS[M]PTDGAK          | 241.16 | WT | SAS[T]PTDGAK          | 348.75   | 10 | 6.35469  |

|       |                |             |    |               |        |    |              |          |    |          |
|-------|----------------|-------------|----|---------------|--------|----|--------------|----------|----|----------|
| Se112 | PRR12 T1192M   | HLA-B*35:01 | MT | TTAGPASAS[M]  | 457.63 | WT | TTAGPASAS[T] | 23547.77 | 10 | 6.35469  |
| Se112 | RANGAP1 L23R   | HLA-A*11:01 | MT | [R]SFKGKSLK   | 21.08  | WT | [L]SFKGKSLK  | 31.97    | 9  | 13.86878 |
| Se112 | RANGAP1 L23R   | HLA-A*11:01 | MT | QVAGGQ[R]SFK  | 71.87  | WT | QVAGGQ[L]SFK | 23.67    | 10 | 13.86878 |
| Se112 | RANGAP1 L23R   | HLA-A*11:01 | MT | VAGGQ[R]SFK   | 194.11 | WT | VAGGQ[L]SFK  | 87.92    | 9  | 13.86878 |
| Se112 | DDX3X R183C    | HLA-A*33:03 | MT | NIELT[C]YTR   | 115.71 | WT | NIELT[R]YTR  | 38.53    | 9  | 74.33424 |
| Se112 | DDX3X R183C    | HLA-A*33:03 | MT | GNIELT[C]YTR  | 265.6  | WT | GNIELT[R]YTR | 263.11   | 10 | 74.33424 |
| Se112 | DDX3X R183C    | HLA-B*35:01 | MT | MGNIELT[C]Y   | 334.18 | WT | MGNIELT[R]Y  | 605.08   | 9  | 74.33424 |
| Se112 | RRAGB N92K     | HLA-C*14:03 | MT | RFLGNLVL[K]L  | 143.78 | WT | RFLGNLVL[N]L | 143.19   | 10 | 6.3353   |
| Se112 | RRAGB N92K     | HLA-A*11:01 | MT | RFLGNLVL[K]   | 235.46 | WT | RFLGNLVL[N]  | 31701.33 | 9  | 6.3353   |
| Se112 | PNCK H392D     | HLA-A*11:01 | MT | ATSFLR[D]IRK  | 34.51  | WT | ATSFLR[H]IRK | 18.1     | 10 | 1.04508  |
| Se112 | PNCK H392D     | HLA-A*11:01 | MT | TSFLR[D]IRK   | 36.04  | WT | TSFLR[H]IRK  | 19.53    | 9  | 1.04508  |
| Se112 | PNCK H392D     | HLA-A*33:03 | MT | NATSFLR[D]IR  | 185.12 | WT | NATSFLR[H]IR | 36.95    | 10 | 1.04508  |
| Se112 | PNCK H392D     | HLA-A*33:03 | MT | ATSFLR[D]IR   | 266.45 | WT | ATSFLR[H]IR  | 42.3     | 9  | 1.04508  |
| Se112 | PNCK H392D     | HLA-C*14:03 | MT | SFLR[D]IRKL   | 315.18 | WT | SFLR[H]IRKL  | 91.66    | 9  | 1.04508  |
| Se112 | PNCK H392D     | HLA-A*11:01 | MT | ATSFLR[D]IR   | 418.45 | WT | ATSFLR[H]IR  | 124.56   | 9  | 1.04508  |
| Se113 | FMO4 G162R     | HLA-A*33:03 | MT | EAF[R]IHKFK   | 73.25  | WT | EAF[G]IHKFK  | 110.12   | 10 | 1.68595  |
| Se113 | FMO4 G162R     | HLA-A*33:03 | MT | HLPLEAFP[R]   | 101.31 | WT | HLPLEAFP[G]  | 34815.72 | 9  | 1.68595  |
| Se113 | MBNL1 T6I      | HLA-A*33:03 | MT | MAVSV[I]PIR   | 38.41  | WT | MAVSV[T]PIR  | 38.7     | 9  | 14.49147 |
| Se113 | MBNL1 T6I      | HLA-B*58:01 | MT | SV[I]PIRDTKW  | 39.2   | WT | SV[T]PIRDTKW | 99.39    | 10 | 14.49147 |
| Se113 | PCDHGB6 R627C  | HLA-A*33:03 | MT | RTGEV[C]TAR   | 208.56 | WT | RTGEV[R]TAR  | 129.88   | 9  | 39.71458 |
| Se113 | PCDHGB6 R627C  | HLA-A*33:03 | MT | [C]TARALGDR   | 467.28 | WT | [R]TARALGDR  | 2477.15  | 9  | 39.71458 |
| Se113 | TRRAP E660D    | HLA-A*33:03 | MT | TTVPYMV[D]JR  | 47.51  | WT | TTVPYMV[E]JR | 16.69    | 9  | 6.62431  |
| Se113 | TRRAP E660D    | HLA-A*33:03 | MT | QTTVPYMV[D]R  | 210.41 | WT | QTTVPYMV[E]R | 73.77    | 10 | 6.62431  |
| Se113 | NSMCE2 F17L    | HLA-C*03:04 | MT | IS[L]SGVESAL  | 87.35  | WT | IS[F]SGVESAL | 35.46    | 10 | 11.00293 |
| Se113 | NSMCE2 F17L    | HLA-C*03:03 | MT | IS[L]SGVESAL  | 87.35  | WT | IS[F]SGVESAL | 35.46    | 10 | 11.00293 |
| Se113 | ECHDC3 V247L   | HLA-C*03:04 | MT | ASLSRP[L]VSL  | 257.52 | WT | ASLSRP[V]VSL | 185.35   | 10 | 1.50265  |
| Se113 | ECHDC3 V247L   | HLA-C*03:03 | MT | ASLSRP[L]VSL  | 257.52 | WT | ASLSRP[V]VSL | 185.35   | 10 | 1.50265  |
| Se113 | ECHDC3 V247L   | HLA-C*03:04 | MT | KIASLSRP[L]   | 258.77 | WT | KIASLSRP[V]  | 1584     | 9  | 1.50265  |
| Se113 | ECHDC3 V247L   | HLA-C*03:03 | MT | KIASLSRP[L]   | 258.77 | WT | KIASLSRP[V]  | 1584     | 9  | 1.50265  |
| Se113 | ZNF664 H49Y    | HLA-A*33:03 | MT | HISELHI[Y]WR  | 8.15   | WT | HISELHI[H]WR | 10.01    | 10 | 19.79416 |
| Se113 | ZNF664 H49Y    | HLA-B*58:01 | MT | HISELHI[Y]W   | 23.31  | WT | HISELHI[H]W  | 27.27    | 9  | 19.79416 |
| Se113 | ZNF664 H49Y    | HLA-A*33:03 | MT | ISELHI[Y]WR   | 187.15 | WT | ISELHI[H]WR  | 329.12   | 9  | 19.79416 |
| Se113 | TP53 R116W     | HLA-B*58:01 | MT | SSCMGGMN[W]   | 27.06  | WT | SSCMGGMN[R]  | 31452.95 | 9  | 32.68065 |
| Se113 | TP53 R116W     | HLA-B*58:01 | MT | NSSCMGGMN[W]  | 76.07  | WT | NSSCMGGMN[R] | 33270.55 | 10 | 32.68065 |
| Se113 | TP53 R116W     | HLA-A*33:03 | MT | SSCMGGMN[W]R  | 303.47 | WT | SSCMGGMN[R]R | 507.12   | 10 | 32.68065 |
| Se113 | PPP6R1 R692G   | HLA-C*03:04 | MT | CAA[G]GGATPL  | 8.96   | WT | CAA[R]GGATPL | 12.99    | 10 | 34.70777 |
| Se113 | PPP6R1 R692G   | HLA-C*03:03 | MT | CAA[G]GGATPL  | 8.96   | WT | CAA[R]GGATPL | 12.99    | 10 | 34.70777 |
| Se113 | PPP6R1 R692G   | HLA-C*03:04 | MT | AA[G]GGATPL   | 44.5   | WT | AA[R]GGATPL  | 18.67    | 9  | 34.70777 |
| Se113 | PPP6R1 R692G   | HLA-C*03:03 | MT | AA[G]GGATPL   | 44.5   | WT | AA[R]GGATPL  | 18.67    | 9  | 34.70777 |
| Se113 | PPP1R3F G278C  | HLA-A*33:03 | MT | TFWANNH[C]R   | 16.67  | WT | TFWANNH[G]R  | 10.84    | 9  | 1.8388   |
| Se113 | PPP1R3F G278C  | HLA-A*33:03 | MT | GTFWANNH[C]R  | 37.63  | WT | GTFWANNH[G]R | 25.84    | 10 | 1.8388   |
| Se113 | PPP1R3F G278C  | HLA-A*33:03 | MT | H[C]RNYTVLLR  | 280.63 | WT | H[G]RNYTVLLR | 177.96   | 10 | 1.8388   |
| Se114 | NLRP3 S597N    | HLA-A*02:01 | MT | KL[N]CKISQOI  | 132.76 | WT | KL[S]CKISQOI | 87.89    | 10 | 1.38248  |
| Se114 | ARL6IP6 L130F  | HLA-A*02:01 | MT | FLLAIAI[Y]FJ  | 3.29   | WT | FLLAIAI[L]J  | 4.29     | 9  | 9.91904  |
| Se114 | ARL6IP6 L130F  | HLA-A*02:01 | MT | FLLAIAI[Y]FIV | 4.47   | WT | FLLAIAI[L]IV | 10.2     | 10 | 9.91904  |
| Se114 | ARL6IP6 L130F  | HLA-A*02:01 | MT | LIAIAY[F]IV   | 35.83  | WT | LIAIAY[L]IV  | 220.35   | 9  | 9.91904  |
| Se114 | ARL6IP6 L130F  | HLA-A*24:02 | MT | AFLAIAI[Y]F   | 228.08 | WT | AFLAIAI[L]   | 1476.02  | 9  | 9.91904  |
| Se114 | ARL6IP6 L130F  | HLA-A*24:02 | MT | AFLAIAI[Y]FJ  | 353.79 | WT | AFLAIAI[L]J  | 234.43   | 10 | 9.91904  |
| Se114 | ARL6IP6 L130F  | HLA-A*02:01 | MT | AIAY[F]IVKEL  | 395.57 | WT | AIAY[L]IVKEL | 625.42   | 10 | 9.91904  |
| Se114 | PLA2R1 G922R   | HLA-A*02:01 | MT | [R]LWGSEECV   | 29.41  | WT | [G]LWGSEECV  | 23.83    | 10 | 1.78733  |
| Se114 | PLA2R1 G922R   | HLA-A*24:02 | MT | GFSSIT[R]LW   | 294.65 | WT | GFSSIT[G]LW  | 296.56   | 10 | 1.78733  |
| Se114 | SSFA2 H740R    | HLA-B*54:01 | MT | CPYSHR[R]AT   | 485.76 | WT | CPYSHR[H]AT  | 102.21   | 9  | 12.21401 |
| Se114 | WDR5B T297A    | HLA-A*02:01 | MT | KLQGH[A]DVV   | 161.73 | WT | KLQGH[T]DVV  | 84.06    | 9  | 5.2915   |
| Se114 | WDR5B T297A    | HLA-A*02:01 | MT | KLQGH[A]DVVI  | 367.08 | WT | KLQGH[T]DVVI | 364.89   | 10 | 5.2915   |
| Se114 | DIRC2 L382W    | HLA-B*54:01 | MT | LPLTTV[T]WYA  | 48.16  | WT | LPLTTV[L]WYA | 48.27    | 10 | 7.42432  |
| Se114 | DIRC2 L382W    | HLA-A*24:02 | MT | T[W]YASCILL   | 439.14 | WT | T[L]YASCILL  | 11025.11 | 9  | 7.42432  |
| Se114 | NSD1 W421C     | HLA-A*02:01 | MT | ILSK[C]EASV   | 28.1   | WT | ILSK[W]EASV  | 16.07    | 9  | 9.03143  |
| Se114 | NSD1 W421C     | HLA-A*02:01 | MT | KILSK[C]EASV  | 63     | WT | KILSK[W]EASV | 39.11    | 10 | 9.03143  |
| Se114 | NEU1 S119I     | HLA-A*02:01 | MT | [I]TWSPTAFIV  | 133.14 | WT | [S]TWSPTAFIV | 132.19   | 10 | 25.27052 |
| Se114 | NEU1 S119I     | HLA-A*02:01 | MT | [I]TWSPTAFI   | 207.69 | WT | [S]TWSPTAFI  | 310.8    | 9  | 25.27052 |
| Se114 | FBXO30 N285T   | HLA-A*02:01 | MT | SALC[T]GFPL   | 336.5  | WT | SALC[N]GFPL  | 327.15   | 9  | 3.96942  |
| Se114 | BIRC3 G472A    | HLA-A*02:01 | MT | ILDSLLTA[A]I  | 21.23  | WT | ILDSLLTA[G]I | 23.97    | 10 | 11.00904 |
| Se114 | BIRC3 G472A    | HLA-A*02:01 | MT | ILDSLLTA[A]   | 29.93  | WT | ILDSLLTA[G]  | 2246.6   | 9  | 11.00904 |
| Se114 | ALOX5AP S108R  | HLA-A*02:01 | MT | YLGERTQ[R]T   | 321.08 | WT | YLGERTQ[S]T  | 114.42   | 9  | 19.47422 |
| Se114 | TJP1 S404C     | HLA-B*54:01 | MT | LPVSP[C]DGV   | 164.63 | WT | LPVSP[S]DGV  | 137      | 9  | 12.60195 |
| Se114 | DECR2 D12Y     | HLA-A*24:02 | MT | [Y]CLPAYRHFL  | 495.93 | WT | [D]CLPAYRHFL | 13153.45 | 10 | 3.63966  |
| Se114 | USP7 D428Y     | HLA-B*54:01 | MT | [Y]PANYILHAV  | 11.04  | WT | [D]PANYILHAV | 286.78   | 10 | 16.72134 |
| Se114 | USP7 D428Y     | HLA-B*54:01 | MT | [Y]PANYILHA   | 33.3   | WT | [D]PANYILHA  | 1433.34  | 9  | 16.72134 |
| Se114 | DYRK1B A417T   | HLA-A*02:01 | MT | RMLEYEP[T]A   | 12.76  | WT | RMLEYEP[A]A  | 12.61    | 9  | 7.88859  |
| Se114 | IRAK1 D52H     | HLA-A*02:01 | MT | ALIVR[H]QTEL  | 412.14 | WT | ALIVR[D]QTEL | 463.96   | 10 | 39.96844 |
| Se115 | RAPH1 S913A    | HLA-B*55:02 | MT | QPSSIPV[P]A   | 177.18 | WT | QPSSIPV[S]   | 4085.08  | 9  | 2.39179  |
| Se115 | ZNF142 L943S   | HLA-B*07:02 | MT | LPKDAP[S]JEL  | 29.69  | WT | LPKDAP[L]JEL | 39.37    | 9  | 5.19336  |
| Se115 | SEC62 F234V    | HLA-C*07:02 | MT | YYLSVGAGC[V]  | 401.98 | WT | YYLSVGAGC[F] | 143.29   | 10 | 20.29382 |
| Se115 | SEC62 F234V    | HLA-A*24:02 | MT | YYLSVGAGC[V]  | 473.06 | WT | YYLSVGAGC[F] | 16.61    | 10 | 20.29382 |
| Se115 | METTL14 A62V   | HLA-B*07:02 | MT | APN[V]KRKYL   | 46.95  | WT | APN[A]KRKYL  | 26.35    | 9  | 6.31498  |
| Se115 | CDC42 K634R    | HLA-B*07:02 | MT | NPV[R]KRKDL   | 371.79 | WT | NPV[K]KRKDL  | 256.71   | 9  | 3.05482  |
| Se115 | ADAMTSL2 P333T | HLA-B*07:02 | MT | [T]PHESRPQPI  | 52.08  | WT | [P]PHESRPQPI | 958.59   | 10 | 1.63625  |
| Se115 | ADAMTSL4 K825N | HLA-A*24:02 | MT | AY[N]YVIHEDL  | 383.92 | WT | AY[K]YVIHEDL | 364.9    | 10 | 1.0468   |



|       |                |             |    |                |        |    |                |          |    |          |
|-------|----------------|-------------|----|----------------|--------|----|----------------|----------|----|----------|
| Se115 | ADAMTS14 Y826N | HLA-A*24:02 | MT | AYK[N]VIHEDL   | 297.86 | WT | AYK[Y]VIHEDL   | 364.9    | 10 | 1.0468   |
| Se115 | ATP11A A915V   | HLA-A*24:02 | MT | [V]YLTLYNISF   | 18.14  | WT | [A]YLTLYNISF   | 33.5     | 10 | 6.47587  |
| Se115 | ATP11A A915V   | HLA-A*24:02 | MT | LYDT[V]YLTTL   | 53.49  | WT | LYDT[A]YLTTL   | 107.66   | 9  | 6.47587  |
| Se115 | ATP11A A915V   | HLA-C*07:02 | MT | LYDT[V]YLTTL   | 201.54 | WT | LYDT[A]YLTTL   | 156.2    | 9  | 6.47587  |
| Se115 | FASN R1349W    | HLA-A*24:02 | MT | GFLLHTLL[W]    | 421.34 | WT | GFLLHTLL[R]    | 15731.21 | 10 | 6.90259  |
| Se115 | B3GNT3 H91Y    | HLA-C*07:02 | MT | YRHCR[Y]FPLL   | 8.92   | WT | YRHCR[H]FPLL   | 8.19     | 10 | 4.02073  |
| Se115 | B3GNT3 H91Y    | HLA-C*07:02 | MT | YRHCR[Y]FPL    | 9.38   | WT | YRHCR[H]FPL    | 8.31     | 9  | 4.02073  |
| Se115 | B3GNT3 H91Y    | HLA-A*24:02 | MT | LYRHCR[Y]FPL   | 88.23  | WT | LYRHCR[H]FPL   | 143.41   | 10 | 4.02073  |
| Se115 | B3GNT3 H91Y    | HLA-A*24:02 | MT | R[Y]FPLLQDV    | 94.2   | WT | R[H]FPLLQDV    | 13765.34 | 9  | 4.02073  |
| Se115 | B3GNT3 H91Y    | HLA-C*07:02 | MT | LYRHCR[Y]FPL   | 301.54 | WT | LYRHCR[H]FPL   | 238.73   | 10 | 4.02073  |
| Se115 | B3GNT3 H91Y    | HLA-C*07:02 | MT | R[Y]FPLLQDV    | 322.35 | WT | R[H]FPLLQDV    | 4101.78  | 9  | 4.02073  |
| Se115 | B3GNT3 H91Y    | HLA-C*07:02 | MT | FLLYRHCR[Y]F   | 395.06 | WT | FLLYRHCR[H]F   | 1249.67  | 10 | 4.02073  |
| Se115 | KMT2B S941C    | HLA-B*07:02 | MT | EPTG[C]GGTL    | 260.28 | WT | EPTG[S]GGTL    | 195.6    | 9  | 10.97326 |
| Se115 | EML2 S185L     | HLA-A*24:02 | MT | RYLSPERLA[L]   | 185.97 | WT | RYLSPERLA[S]   | 8036.17  | 10 | 7.76798  |
| Se115 | EML2 S185L     | HLA-C*07:02 | MT | RYLSPERLA[L]   | 331.3  | WT | RYLSPERLA[S]   | 9492.02  | 10 | 7.76798  |
| Se115 | SLC52A3 F129S  | HLA-B*07:02 | MT | LP[S]MSRLPT    | 28.69  | WT | LP[F]MSRLPT    | 32.55    | 9  | 3.56899  |
| Se115 | SLC52A3 F129S  | HLA-B*55:02 | MT | LP[S]MSRLPT    | 348.34 | WT | LP[F]MSRLPT    | 56.89    | 9  | 3.56899  |
| Se116 | MXRA8 P160L    | HLA-B*40:02 | MT | GDFSLRIE[L]    | 192.25 | WT | GDFSLRIE[P]    | 8093.88  | 9  | 10.10897 |
| Se116 | MXRA8 P160L    | HLA-A*02:01 | MT | SLRIE[L]LEV    | 200.5  | WT | SLRIE[P]LEV    | 858.73   | 9  | 10.10897 |
| Se116 | MXRA8 P160L    | HLA-A*02:01 | MT | FSLRIE[L]LEV   | 225.01 | WT | FSLRIE[P]LEV   | 411.22   | 10 | 10.10897 |
| Se116 | MXRA8 P160L    | HLA-B*40:02 | MT | GDFSLRIE[L]L   | 251.23 | WT | GDFSLRIE[P]L   | 93.65    | 10 | 10.10897 |
| Se116 | ZNF638 K1431N  | HLA-A*02:01 | MT | [N]LSAKEFGL    | 251.8  | WT | [K]LSAKEFGL    | 57.47    | 9  | 17.76437 |
| Se116 | RBSN L559V     | HLA-B*40:02 | MT | REIGPFQ[V]EP   | 208.91 | WT | REIGPFQ[L]EP   | 244.22   | 10 | 3.74079  |
| Se116 | RBSN L559V     | HLA-B*40:02 | MT | REIGPFQ[V]E    | 406.34 | WT | REIGPFQ[L]E    | 820.25   | 9  | 3.74079  |
| Se116 | EXOSC7 M239I   | HLA-A*11:01 | MT | VTC[I]RKVGK    | 303.53 | WT | VTC[M]RKVGK    | 237.73   | 9  | 20.6967  |
| Se116 | EXOSC7 M239I   | HLA-A*11:01 | MT | VVTC[I]RKVGK   | 452.79 | WT | VVTC[M]RKVGK   | 458.35   | 10 | 20.6967  |
| Se116 | CACNA1D L80V   | HLA-C*03:04 | MT | SAPPPVGS[V]    | 133.81 | WT | SAPPPVGS[L]    | 30.03    | 9  | 1.33245  |
| Se116 | ABI3BP E427Q   | HLA-A*11:01 | MT | KTSRTL[Q]QPR   | 268.84 | WT | KTSRTL[E]QPR   | 377.57   | 10 | 1.32572  |
| Se116 | ABI3BP E427Q   | HLA-C*03:04 | MT | RTL[Q]QPRATL   | 294    | WT | RTL[E]QPRATL   | 195.81   | 10 | 1.32572  |
| Se116 | GEMIN5 R718Q   | HLA-A*11:01 | MT | HS[R]PPQGKK    | 394.92 | WT | HS[R]PPQGKK    | 947.63   | 9  | 4.7956   |
| Se116 | DOCK2 M1388R   | HLA-A*11:01 | MT | MTQFPNAEK[R]   | 329.31 | WT | MTQFPNAEK[M]   | 13705.28 | 10 | 1.05531  |
| Se116 | DOCK2 M1388R   | HLA-B*40:02 | MT | AEK[R]NTTSA    | 434.48 | WT | AEK[M]NTTSA    | 344.51   | 9  | 1.05531  |
| Se116 | MDC1 M1316I    | HLA-A*11:01 | MT | RSRTN[I]SSVK   | 274.17 | WT | RSRTN[M]SSVK   | 225.96   | 10 | 8.17975  |
| Se116 | BAG6 Q289E     | HLA-A*02:01 | MT | FL[E]RYEVL     | 140.43 | WT | FL[Q]RYEVL     | 36.65    | 9  | 62.92272 |
| Se116 | BAG6 Q289E     | HLA-B*40:02 | MT | L[E]RYEVLGA    | 479.62 | WT | L[Q]RYEVLGA    | 6081.61  | 10 | 62.92272 |
| Se116 | FGD2 R322C     | HLA-A*11:01 | MT | TL[L]C]EGPVLK  | 62.84  | WT | TL[L]R]EGPVLK  | 54.05    | 10 | 1.03685  |
| Se116 | FGD2 R322C     | HLA-A*02:01 | MT | LL[C]EGPVLKI   | 120.28 | WT | LL[R]EGPVLKI   | 833.17   | 10 | 1.03685  |
| Se116 | FGD2 R322C     | HLA-A*11:01 | MT | LL[C]EGPVLK    | 142.29 | WT | LL[R]EGPVLK    | 399.37   | 9  | 1.03685  |
| Se116 | FGD2 R322C     | HLA-A*02:01 | MT | TL[L]C]EGPVL   | 199.92 | WT | TL[L]R]EGPVL   | 934.64   | 9  | 1.03685  |
| Se116 | RBAK C266S     | HLA-A*11:01 | MT | CSE[S]GKSFCK   | 359.69 | WT | CSE[C]GKSFCK   | 410.42   | 10 | 6.08618  |
| Se116 | FBXL18 R501H   | HLA-C*03:04 | MT | SAMP[H]NEPAI   | 20.72  | WT | SAMP[R]NEPAI   | 31.12    | 10 | 2.75813  |
| Se116 | FBXL18 R501H   | HLA-C*03:04 | MT | SAMP[H]NEPA    | 150.29 | WT | SAMP[R]NEPA    | 275.08   | 9  | 2.75813  |
| Se116 | TRIM4 R170L    | HLA-A*11:01 | MT | [L]MRISTEFSK   | 260.86 | WT | [R]MRISTEFSK   | 173.13   | 10 | 4.22197  |
| Se116 | TRIB1 L42I     | HLA-A*11:01 | MT | IVLGD[L]K[I]RK | 150.47 | WT | IVLGD[L]K[L]RK | 101.71   | 10 | 6.17113  |
| Se116 | TRIB1 L42I     | HLA-A*11:01 | MT | VLGD[L]K[I]RK  | 152.88 | WT | VLGD[L]K[L]RK  | 152.56   | 9  | 6.17113  |
| Se116 | ZNF239 R44K    | HLA-A*11:01 | MT | ASSPISR[N]K    | 81.78  | WT | ASSPISR[N]R    | 535.59   | 9  | 6.93293  |
| Se116 | IGHMBP2 D754Y  | HLA-A*02:01 | MT | SLNSH[Y]RLRV   | 171.88 | WT | SLNSH[D]RLRV   | 481.03   | 10 | 3.40419  |
| Se116 | TAPBPL R442H   | HLA-A*02:01 | MT | GLLQAE[H]WET   | 136.2  | WT | GLLQAE[R]WET   | 647.59   | 10 | 24.38147 |
| Se116 | TAPBPL R442H   | HLA-A*02:01 | MT | LLQAE[H]WET    | 165.28 | WT | LLQAE[R]WET    | 832.05   | 9  | 24.38147 |
| Se116 | TAPBPL R442H   | HLA-B*40:02 | MT | AE[H]WETTSCA   | 212.13 | WT | AE[R]WETTSCA   | 299.58   | 10 | 24.38147 |
| Se116 | TAPBPL R442H   | HLA-B*40:02 | MT | AE[H]WETTSC    | 309.12 | WT | AE[R]WETTSC    | 465.44   | 9  | 24.38147 |
| Se116 | SPRY2 R292H    | HLA-A*11:01 | MT | RVNRP[C]G[H]CK | 53.16  | WT | RVNRP[C]G[R]CK | 163.85   | 10 | 5.79804  |
| Se116 | NOP9 R290C     | HLA-A*11:01 | MT | QVALQVLH[C]K   | 58.58  | WT | QVALQVLH[R]K   | 53.94    | 10 | 7.96378  |
| Se116 | NOP9 R290C     | HLA-A*11:01 | MT | VALQVLH[C]K    | 121.66 | WT | VALQVLH[R]K    | 94.68    | 9  | 7.96378  |
| Se116 | NOP9 R290C     | HLA-C*03:04 | MT | VALQVLH[C]KL   | 484.72 | WT | VALQVLH[R]KL   | 612.2    | 10 | 7.96378  |
| Se116 | SYNE2 M5466I   | HLA-A*02:01 | MT | [I]LLPGLHSL    | 11.91  | WT | [M]LLPGLHSL    | 6.93     | 10 | 5.305    |
| Se116 | SYNE2 M5466I   | HLA-B*40:02 | MT | AESSTH[I]JLL   | 18.25  | WT | AESSTH[M]JLL   | 24.94    | 9  | 5.305    |
| Se116 | SYNE2 M5466I   | HLA-C*03:04 | MT | [I]LLPGLHSL    | 321.7  | WT | [M]LLPGLHSL    | 101.37   | 10 | 5.305    |
| Se116 | ITGAE I909T    | HLA-A*02:01 | MT | IMNCR[I]GHPV   | 49.52  | WT | IMNCR[I]GHPV   | 24.11    | 10 | 1.06409  |
| Se116 | ITGAE I909T    | HLA-A*11:01 | MT | R[I]GHPVLR     | 133.74 | WT | R[I]GHPVLR     | 210.18   | 9  | 1.06409  |
| Se116 | TP53 R116W     | HLA-A*11:01 | MT | SSCMGGMN[W]R   | 314.72 | WT | SSCMGGMN[R]R   | 416.65   | 10 | 26.67127 |
| Se116 | TP53 R116W     | HLA-A*02:01 | MT | GMN[W]RPILT    | 349.83 | WT | GMN[R]RPILT    | 1051.42  | 10 | 26.67127 |
| Se116 | MAPK7 P323S    | HLA-A*11:01 | MT | PVSE[S]APPK    | 479    | WT | PVSE[P]APPK    | 594.12   | 9  | 4.94366  |
| Se116 | KCNJ2 I269V    | HLA-A*02:01 | MT | FLVSPIT[V]V    | 7.12   | WT | FLVSPIT[I]V    | 9.1      | 9  | 4.88954  |
| Se116 | KCNJ2 I269V    | HLA-A*02:01 | MT | RIFLVSPT[V]    | 108.96 | WT | RIFLVSPT[I]    | 501.02   | 10 | 4.88954  |
| Se116 | KCNJ2 I269V    | HLA-C*03:04 | MT | FLVSPIT[V]V    | 146.34 | WT | FLVSPIT[I]V    | 439.92   | 9  | 4.88954  |
| Se116 | GDF15 R57Q     | HLA-B*40:02 | MT | REL[Q]KRYEDL   | 43.01  | WT | REL[R]KRYEDL   | 60.79    | 10 | 4.29015  |
| Se116 | MOC3 V189F     | HLA-A*02:01 | MT | YL[F]NDACVLA   | 7.9    | WT | YL[V]NDACVLA   | 41.85    | 10 | 8.32048  |
| Se116 | MOC3 V189F     | HLA-A*02:01 | MT | YL[F]NDACVL    | 10.19  | WT | YL[V]NDACVL    | 51.08    | 9  | 8.32048  |
| Se116 | MOC3 V189F     | HLA-C*03:04 | MT | YL[F]NDACVL    | 17.95  | WT | YL[V]NDACVL    | 31.71    | 9  | 8.32048  |
| Se117 | PMF1 E198K     | HLA-B*40:06 | MT | REQR[KL]VAV    | 256.39 | WT | REQR[E]LVAV    | 259.08   | 9  | 41.43247 |
| Se117 | ATP2B2 P859T   | HLA-C*15:02 | MT | S[T]LKAVQML    | 413.44 | WT | S[P]LKAVQML    | 18781.37 | 9  | 3.23116  |
| Se117 | CUL7 R1062Q    | HLA-A*24:02 | MT | TFWVPV[F]R]EQL | 354.74 | WT | TFWVPV[F]R]EQL | 506.94   | 10 | 18.0435  |
| Se117 | SLC17A5 F48L   | HLA-A*24:02 | MT | RYNLAILAF[L]   | 58.12  | WT | RYNLAILAF[F]   | 16.54    | 10 | 7.49879  |
| Se117 | UTRN D1037V    | HLA-A*24:02 | MT | KWMDGVK[V]F    | 172.03 | WT | KWMDGVK[D]F    | 244.97   | 9  | 2.61391  |
| Se117 | UTRN D1037V    | HLA-A*24:02 | MT | KWMDGVK[V]JL   | 347.56 | WT | KWMDGVK[D]JL   | 668.75   | 10 | 2.61391  |
| Se117 | TMEM140 A153V  | HLA-C*15:02 | MT | LSLPGPGL[V]    | 143.38 | WT | LSLPGPGL[A]    | 1386.92  | 10 | 5.21187  |
| Se117 | CLEC5A E113V   | HLA-A*24:02 | MT | IYHR[V]EKRW    | 458.22 | WT | IYHR[E]EKRW    | 1854.96  | 9  | 3.15483  |

|       |                |             |    |                |        |    |                |          |    |          |
|-------|----------------|-------------|----|----------------|--------|----|----------------|----------|----|----------|
| Se117 | CLECSA E113V   | HLA-A*24:02 | MT | YFIGLIYHR[V]   | 495.25 | WT | YFIGLIYHR[E]   | 11721.77 | 10 | 3.15483  |
| Se117 | TRPS1 S882F    | HLA-A*24:02 | MT | QYPASGENK[F]   | 215.63 | WT | QYPASGENK[S]   | 20245.66 | 10 | 17.39733 |
| Se117 | PLEC I3605L    | HLA-B*40:06 | MT | KERM[L]IIII    | 203.88 | WT | KERM[I]IIII    | 221.54   | 9  | 37.11197 |
| Se117 | GBA2 L550F     | HLA-A*24:02 | MT | FYASFALIM[F]   | 32.61  | WT | FYASFALIM[L]   | 259.8    | 10 | 16.68847 |
| Se117 | DHCR7 Q144E    | HLA-A*24:02 | MT | KY[E]INGLQAW   | 156.74 | WT | KY[Q]INGLQAW   | 30.42    | 10 | 17.94896 |
| Se117 | TMPRSS13 L308Q | HLA-A*24:02 | MT | KWPWQVS[Q]HF   | 34.54  | WT | KWPWQVS[L]HF   | 29.21    | 10 | 6.03841  |
| Se117 | EFTUD1 V487L   | HLA-B*40:06 | MT | LEFLRR[L]PL    | 273.51 | WT | LEFLRR[V]PL    | 203.05   | 9  | 13.55461 |
| Se117 | TP53 C9Y       | HLA-C*15:02 | MT | KT[Y]PVQLWV    | 19.62  | WT | KT[C]PVQLWV    | 163.76   | 9  | 18.04264 |
| Se117 | FARSA P347L    | HLA-C*15:02 | MT | FT[L]VKYFSI    | 287.34 | WT | FT[P]VKYFSI    | 468.4    | 9  | 29.65828 |
| Se117 | DYRK1A A26G    | HLA-C*15:02 | MT | FSFHA[G]GLQM   | 63.04  | WT | FSFHA[A]GLQM   | 63.42    | 10 | 10.08463 |
| Se117 | PIM3 T86A      | HLA-B*40:06 | MT | TEWGS LGGA[A]  | 252.09 | WT | TEWGS LGGA[T]  | 1033.81  | 10 | 16.67216 |
| Se117 | PDK3 R162H     | HLA-C*15:02 | MT | YTNRISF[H]ML   | 56.69  | WT | YTNRISF[R]ML   | 60.74    | 10 | 2.4772   |
| Se117 | PDK3 R162H     | HLA-C*15:02 | MT | YTNRISF[H]M    | 78.46  | WT | YTNRISF[R]M    | 77.14    | 9  | 2.4772   |
| Se117 | PDK3 R162H     | HLA-A*24:02 | MT | FYTNRISF[H]M   | 273.7  | WT | FYTNRISF[R]M   | 297.87   | 10 | 2.4772   |
| Se118 | PRKCZ R73G     | HLA-A*11:01 | MT | [G]VIGRGSYAK   | 35.8   | WT | [R]VIGRGSYAK   | 22.5     | 10 | 6.3913   |
| Se118 | USP24 S2135T   | HLA-C*03:04 | MT | Y[T]SDYFSFVL   | 8.54   | WT | Y[S]SDYFSFVL   | 8.19     | 10 | 7.53997  |
| Se118 | USP24 S2135T   | HLA-C*03:04 | MT | Y[T]SDYFSFV    | 112.95 | WT | Y[S]SDYFSFV    | 85.75    | 9  | 7.53997  |
| Se118 | USP24 S2135T   | HLA-A*26:01 | MT | DVY[T]SDYFSF   | 160.16 | WT | DVY[S]SDYFSF   | 128.06   | 10 | 7.53997  |
| Se118 | USP24 S2135T   | HLA-A*26:01 | MT | Y[T]SDYFSFV    | 166.61 | WT | Y[S]SDYFSFV    | 1745.74  | 9  | 7.53997  |
| Se118 | ATP8B2 D1022N  | HLA-C*03:04 | MT | LA[N]YQSFV     | 88.71  | WT | LA[D]YQSFV     | 170.83   | 9  | 6.63327  |
| Se118 | ATP8B2 D1022N  | HLA-B*54:01 | MT | LA[N]YQSFV     | 487.12 | WT | LA[D]YQSFV     | 1524.11  | 9  | 6.63327  |
| Se118 | ELK4 M405L     | HLA-B*40:06 | MT | LERLCVTV[L]    | 474.53 | WT | LERLCVTV[M]    | 896.47   | 9  | 2.17001  |
| Se118 | BIRC6 D1967H   | HLA-C*03:04 | MT | KAVEE[H]SRVF   | 73.11  | WT | KAVEE[D]SRVF   | 126.26   | 10 | 6.5027   |
| Se118 | GULP1 D103H    | HLA-A*11:01 | MT | RISFCA[H]DK    | 41.32  | WT | RISFCA[D]DK    | 111.27   | 9  | 1.33919  |
| Se118 | MYEOV2 K192Q   | HLA-A*26:01 | MT | NQS[Q]WLGSY    | 433.54 | WT | NQS[K]WLGSY    | 418.58   | 9  | 20.79512 |
| Se118 | FBLN2 G707S    | HLA-A*11:01 | MT | AICSCFP[S]Y    | 109.19 | WT | AICSCFP[G]Y    | 162.47   | 9  | 6.40665  |
| Se118 | FBLN2 G707S    | HLA-C*03:04 | MT | SAICSCFP[S]Y   | 194.17 | WT | SAICSCFP[G]Y   | 709.18   | 10 | 6.40665  |
| Se118 | FBLN2 G707S    | HLA-A*11:01 | MT | SAICSCFP[S]Y   | 206.61 | WT | SAICSCFP[G]Y   | 270.64   | 10 | 6.40665  |
| Se118 | FRYL S2582F    | HLA-A*26:01 | MT | TFFEDEG[F]Y    | 117.86 | WT | TFFEDEG[S]Y    | 107.89   | 9  | 4.99589  |
| Se118 | FRYL S2582F    | HLA-B*40:06 | MT | FEDEG[F]YII    | 253.2  | WT | FEDEG[S]YII    | 392.31   | 9  | 4.99589  |
| Se118 | FRAS1 L1138F   | HLA-B*40:06 | MT | VED[F]LFHV     | 368.83 | WT | VED[L]LFHV     | 358.37   | 9  | 1.45026  |
| Se118 | FAT2 T843A     | HLA-A*11:01 | MT | TTIAEL[T]TK    | 18.1   | WT | TTIAEL[T]TK    | 18.1     | 9  | 1.54178  |
| Se118 | FAT2 T843A     | HLA-A*11:01 | MT | GTIAEL[A]TK    | 129.26 | WT | GTIAEL[T]TK    | 136.03   | 10 | 1.54178  |
| Se118 | CD83 S48F      | HLA-A*11:01 | MT | QVPYTV[F]WVK   | 93.1   | WT | QVPYTV[S]WVK   | 206.76   | 10 | 8.59801  |
| Se118 | CD83 S48F      | HLA-C*03:04 | MT | YTV[F]WVKLL    | 311.6  | WT | YTV[S]WVKLL    | 100.62   | 9  | 8.59801  |
| Se118 | BAK1 G4W       | HLA-A*11:01 | MT | AS[W]QGGPPR    | 213.97 | WT | AS[G]QGGPPR    | 1156.24  | 10 | 22.68104 |
| Se118 | FAM83B E575G   | HLA-A*11:01 | MT | GSQGS[G]TPK    | 109.9  | WT | GSQGS[E]TPK    | 151.93   | 9  | 2.02613  |
| Se118 | TULP4 Y464F    | HLA-B*40:06 | MT | LE[F]LGLLVP    | 53.94  | WT | LE[Y]LGLLVP    | 60.95    | 10 | 3.23813  |
| Se118 | TULP4 Y464F    | HLA-A*11:01 | MT | [F]LGLLVPILK   | 238.97 | WT | [Y]LGLLVPILK   | 147.43   | 10 | 3.23813  |
| Se118 | C7orf60 D349A  | HLA-B*54:01 | MT | IPQDFNSIE[A]   | 168.09 | WT | IPQDFNSIE[D]   | 19919.27 | 10 | 3.22274  |
| Se118 | SNTB1 H382N    | HLA-A*11:01 | MT | RLV[N]SGPGK    | 154.91 | WT | RLV[H]SGPGK    | 142.44   | 9  | 7.19712  |
| Se118 | SPTAN1 Q2124R  | HLA-C*03:04 | MT | [R]ADFNQLAEL   | 64.12  | WT | [Q]ADFNQLAEL   | 127.37   | 10 | 36.04571 |
| Se118 | SPTAN1 Q2124R  | HLA-C*03:04 | MT | SA[R]ADFNQL    | 415.37 | WT | SA[Q]ADFNQL    | 195.48   | 9  | 36.04571 |
| Se118 | ABCA2 H1295L   | HLA-C*03:04 | MT | GAFERLFQ[L]L   | 346.96 | WT | GAFERLFQ[H]L   | 365.43   | 10 | 6.92575  |
| Se118 | ABCA2 H1295L   | HLA-C*03:04 | MT | GAFERLFQ[L]    | 351.53 | WT | GAFERLFQ[H]    | 20026.77 | 9  | 6.92575  |
| Se118 | CDHR1 K578M    | HLA-C*03:04 | MT | [M]SVQKKTMLV   | 75.49  | WT | [K]SVQKKTMLV   | 621.02   | 10 | 1.26905  |
| Se118 | CDHR1 K578M    | HLA-C*03:04 | MT | FG[M]SVQKKTMLV | 178.94 | WT | FG[K]SVQKKTMLV | 8833.22  | 10 | 1.26905  |
| Se118 | CDHR1 K578M    | HLA-B*54:01 | MT | HPPQFG[M]SV    | 389.84 | WT | HPPQFG[K]SV    | 1761.11  | 9  | 1.26905  |
| Se118 | MRPL43 R68C    | HLA-C*03:04 | MT | YVNS[R]PCCV    | 268.76 | WT | YVNS[R]PCCV    | 262.95   | 9  | 11.42203 |
| Se118 | MRPL43 R68C    | HLA-B*54:01 | MT | [C]PCCVPRVVA   | 269.41 | WT | [R]PCCVPRVVA   | 2255.76  | 10 | 11.42203 |
| Se118 | SLC43A1 P183T  | HLA-A*11:01 | MT | SSAITF[T]GIK   | 23.19  | WT | SSAITF[P]GIK   | 31.16    | 10 | 1.49436  |
| Se118 | SLC43A1 P183T  | HLA-A*11:01 | MT | SAITF[T]GIK    | 31.63  | WT | SAITF[P]GIK    | 59.03    | 9  | 1.49436  |
| Se118 | SLC43A1 P183T  | HLA-C*03:04 | MT | SAITF[T]GIKL   | 84.74  | WT | SAITF[P]GIKL   | 87.68    | 10 | 1.49436  |
| Se118 | SLC43A1 P183T  | HLA-A*11:01 | MT | ITF[T]GIKLIY   | 220.99 | WT | ITF[P]GIKLIY   | 223.12   | 10 | 1.49436  |
| Se118 | LGALS12 D11H   | HLA-B*54:01 | MT | VPL[H]AHRFQV   | 293.57 | WT | VPL[D]AHRFQV   | 276.02   | 10 | 1.72826  |
| Se118 | CYFIP1 Q378H   | HLA-A*26:01 | MT | EVVTGSGR[H]    | 492.67 | WT | EVVTGSGR[Q]    | 5645.47  | 9  | 17.20739 |
| Se118 | STRA6 A400S    | HLA-C*03:04 | MT | RALHRGA[S]L    | 20.84  | WT | RALHRGA[A]L    | 16.51    | 9  | 1.04246  |
| Se118 | STRA6 A400S    | HLA-C*03:04 | MT | GA[S]LDLSPL    | 140.59 | WT | GA[A]LDLSPL    | 85.56    | 9  | 1.04246  |
| Se118 | STRA6 A400S    | HLA-A*11:01 | MT | A[S]LDLSPLHR   | 179.85 | WT | A[A]LDLSPLHR   | 492.47   | 10 | 1.04246  |
| Se118 | ALDH1A3 V170M  | HLA-A*11:01 | MT | R[M]TLELGGK    | 494.31 | WT | R[V]TLELGGK    | 233.61   | 9  | 3.74735  |
| Se118 | GLYR1 R7W      | HLA-A*11:01 | MT | [W]LGDLVWGK    | 421.52 | WT | [R]LGDLVWGK    | 74.86    | 9  | 24.80077 |
| Se118 | GLYR1 R7W      | HLA-C*03:04 | MT | AAVSL[W]LGD    | 438.39 | WT | AAVSL[R]LGD    | 513.31   | 10 | 24.80077 |
| Se118 | FBXL19 L74V    | HLA-C*03:04 | MT | L[V]RQCTAPV    | 249.78 | WT | L[L]RQCTAPV    | 499.44   | 10 | 9.06548  |
| Se118 | FBXL19 L74V    | HLA-C*03:04 | MT | L[V]RQCTAPV    | 342.99 | WT | L[L]RQCTAPV    | 934.03   | 9  | 9.06548  |
| Se118 | RILP Q250H     | HLA-A*11:01 | MT | [H]ILQERNELK   | 165.96 | WT | [Q]ILQERNELK   | 366.62   | 10 | 3.50254  |
| Se118 | RILP Q250H     | HLA-C*03:04 | MT | FSREEFE[H]IL   | 256.59 | WT | FSREEFE[Q]IL   | 221.53   | 10 | 3.50254  |
| Se118 | PHF12 G938R    | HLA-C*03:04 | MT | [R]AGWEGTAL    | 149.22 | WT | [G]AGWEGTAL    | 928.33   | 9  | 9.50122  |
| Se118 | PHF12 G938R    | HLA-A*11:01 | MT | SSSLIGGS[R]    | 315.79 | WT | SSSLIGGS[G]    | 26148.08 | 10 | 9.50122  |
| Se118 | PHF12 G938R    | HLA-A*11:01 | MT | SSSLIGGS[R]    | 319.18 | WT | SSSLIGGS[G]    | 26810.49 | 9  | 9.50122  |
| Se118 | PHF12 G938R    | HLA-C*03:04 | MT | [R]AGWEGTALL   | 459.34 | WT | [G]AGWEGTALL   | 2505.08  | 10 | 9.50122  |
| Se118 | STARD3 W386C   | HLA-A*11:01 | MT | FV[C]ILNTDLK   | 240.54 | WT | FV[W]ILNTDLK   | 145.18   | 10 | 16.70026 |
| Se118 | CHERP K879N    | HLA-A*26:01 | MT | DVRD[N]WDQY    | 134.84 | WT | DVRD[K]WDQY    | 315.5    | 9  | 14.16531 |
| Se118 | ATRN H808R     | HLA-A*11:01 | MT | SVCERPAN[R]    | 430.8  | WT | SVCERPAN[H]    | 2750.14  | 9  | 11.56261 |
| Se119 | ESPN D689N     | HLA-A*02:06 | MT | FQP[N]SPLPSV   | 7.96   | WT | FQP[D]SPLPSV   | 4.75     | 10 | 9.09865  |
| Se119 | ESPN D689N     | HLA-B*35:01 | MT | QPAFQP[N]SPL   | 130.44 | WT | QPAFQP[D]SPL   | 119.25   | 10 | 9.09865  |
| Se119 | ESPN D689N     | HLA-C*03:03 | MT | PAFQP[N]SPL    | 197.44 | WT | PAFQP[D]SPL    | 292.96   | 9  | 9.09865  |
| Se119 | ESPN D689N     | HLA-C*03:04 | MT | PAFQP[N]SPL    | 197.44 | WT | PAFQP[D]SPL    | 292.96   | 9  | 9.09865  |
| Se119 | ZMYND10 N301H  | HLA-A*02:06 | MT | TLLDQLP[H]L    | 5.53   | WT | TLLDQLP[N]L    | 6.49     | 9  | 1.46587  |

|       |                |             |    |               |        |    |               |          |    |          |
|-------|----------------|-------------|----|---------------|--------|----|---------------|----------|----|----------|
| Se119 | ZMYND10 N301H  | HLA-B*35:01 | MT | LP[H]LAHLQSF  | 19.66  | WT | LP[N]LAHLQSF  | 9.86     | 10 | 1.46587  |
| Se119 | ZMYND10 N301H  | HLA-A*02:06 | MT | TLLDQLP[H]LA  | 33.16  | WT | TLLDQLP[N]LA  | 70.46    | 10 | 1.46587  |
| Se119 | ZMYND10 N301H  | HLA-A*02:06 | MT | [H]LAHLQSF    | 237.62 | WT | [N]LAHLQSF    | 339.5    | 10 | 1.46587  |
| Se119 | ZMYND10 N301H  | HLA-A*02:06 | MT | [H]LAHLQSF    | 339.79 | WT | [N]LAHLQSF    | 535.1    | 9  | 1.46587  |
| Se119 | ZMYND10 N301H  | HLA-A*02:06 | MT | LLDQLP[H]LA   | 488.05 | WT | LLDQLP[N]LA   | 1011.2   | 9  | 1.46587  |
| Se119 | UGT2B7 T503S   | HLA-A*02:06 | MT | FLLVCVA[S]V   | 6.47   | WT | FLLVCVA[T]V   | 9.7      | 9  | 5.4888   |
| Se119 | UGT2B7 T503S   | HLA-A*02:06 | MT | CVA[S]VIFIV   | 42.06  | WT | CVA[T]VIFIV   | 91.43    | 9  | 5.4888   |
| Se119 | UGT2B7 T503S   | HLA-A*02:06 | MT | FLLVCVA[S]VI  | 111.87 | WT | FLLVCVA[T]VI  | 97.54    | 10 | 5.4888   |
| Se119 | PCDHGC4 V368A  | HLA-C*03:03 | MT | SAEPGT[A]VAL  | 30.91  | WT | SAEPGT[V]VAL  | 30.78    | 10 | 1.87483  |
| Se119 | PCDHGC4 V368A  | HLA-C*03:04 | MT | SAEPGT[A]VAL  | 30.91  | WT | SAEPGT[V]VAL  | 30.78    | 10 | 1.87483  |
| Se119 | PCDHGC4 V368A  | HLA-A*02:06 | MT | GT[A]VALISV   | 68.04  | WT | GT[V]VALISV   | 82.97    | 9  | 1.87483  |
| Se119 | PCDHGC4 V368A  | HLA-B*40:02 | MT | AEPGT[A]VAL   | 110.97 | WT | AEPGT[V]VAL   | 84.54    | 9  | 1.87483  |
| Se119 | PCDHGC4 V368A  | HLA-B*40:02 | MT | AEPGT[A]VALI  | 350.82 | WT | AEPGT[V]VALI  | 316.2    | 10 | 1.87483  |
| Se119 | LRRIC16A G171V | HLA-A*02:06 | MT | L[V]FSYREEV   | 23.72  | WT | L[G]FSYREEV   | 1721.08  | 9  | 3.65601  |
| Se119 | LRRIC16A G171V | HLA-B*35:01 | MT | YACVCDWL[V]F  | 33.31  | WT | YACVCDWL[G]F  | 121.15   | 10 | 3.65601  |
| Se119 | LRRIC16A G171V | HLA-A*24:02 | MT | MYACVCDWL[V]  | 55.3   | WT | MYACVCDWL[G]  | 980.86   | 10 | 3.65601  |
| Se119 | LRRIC16A G171V | HLA-A*02:06 | MT | WL[V]FSYREEV  | 84.89  | WT | WL[G]FSYREEV  | 243.02   | 10 | 3.65601  |
| Se119 | LRRIC16A G171V | HLA-C*03:03 | MT | YACVCDWL[V]F  | 99.96  | WT | YACVCDWL[G]F  | 415.04   | 10 | 3.65601  |
| Se119 | LRRIC16A G171V | HLA-C*03:04 | MT | YACVCDWL[V]F  | 99.96  | WT | YACVCDWL[G]F  | 415.04   | 10 | 3.65601  |
| Se119 | LRRIC16A G171V | HLA-B*35:01 | MT | CVCDWL[V]FSY  | 187.18 | WT | CVCDWL[G]FSY  | 251.45   | 10 | 3.65601  |
| Se119 | LRRIC16A G171V | HLA-A*02:06 | MT | YACVCDWL[V]   | 222.96 | WT | YACVCDWL[G]   | 19562.46 | 9  | 3.65601  |
| Se119 | GLTSCR1L I166L | HLA-C*03:03 | MT | YSGQTLQP[L]   | 49.37  | WT | YSGQTLQP[I]   | 287.87   | 9  | 3.01907  |
| Se119 | GLTSCR1L I166L | HLA-C*03:04 | MT | YSGQTLQP[L]   | 49.37  | WT | YSGQTLQP[I]   | 287.87   | 9  | 3.01907  |
| Se119 | GLTSCR1L I166L | HLA-A*02:06 | MT | LQP[L]GVTHV   | 108.38 | WT | LQP[I]GVTHV   | 138.43   | 9  | 3.01907  |
| Se119 | GLTSCR1L I166L | HLA-B*35:01 | MT | QP[L]GVTHVPV  | 232.29 | WT | QP[I]GVTHVPV  | 82.53    | 10 | 3.01907  |
| Se119 | GLTSCR1L I166L | HLA-A*02:06 | MT | TLQP[I]GVTHV  | 239.99 | WT | TLQP[I]GVTHV  | 196.57   | 10 | 3.01907  |
| Se119 | ZNF775 P275L   | HLA-C*03:03 | MT | AAVSGPEG[L]   | 116.83 | WT | AAVSGPEG[P]   | 34248.56 | 9  | 1.69208  |
| Se119 | ZNF775 P275L   | HLA-C*03:04 | MT | AAVSGPEG[L]   | 116.83 | WT | AAVSGPEG[P]   | 34248.56 | 9  | 1.69208  |
| Se119 | ZNF775 P275L   | HLA-C*03:03 | MT | RAAVSGPEG[L]  | 142.92 | WT | RAAVSGPEG[P]  | 30454.34 | 10 | 1.69208  |
| Se119 | ZNF775 P275L   | HLA-C*03:04 | MT | RAAVSGPEG[L]  | 142.92 | WT | RAAVSGPEG[P]  | 30454.34 | 10 | 1.69208  |
| Se119 | SEC31B G122V   | HLA-C*03:03 | MT | HT[V]AVRALDL  | 269.09 | WT | HT[G]AVRALDL  | 3095.05  | 10 | 2.24443  |
| Se119 | SEC31B G122V   | HLA-C*03:04 | MT | HT[V]AVRALDL  | 269.09 | WT | HT[G]AVRALDL  | 3095.05  | 10 | 2.24443  |
| Se119 | FRMD8 R152L    | HLA-A*02:06 | MT | FLPAHLCK[R]   | 10.8   | WT | FLPAHLCK[R]   | 3542.51  | 9  | 10.75632 |
| Se119 | FRMD8 R152L    | HLA-A*02:06 | MT | K[L]GQSLFAA   | 49.54  | WT | K[R]GQSLFAA   | 14868.01 | 9  | 10.75632 |
| Se119 | FRMD8 R152L    | HLA-A*02:06 | MT | K[L]GQSLFAAL  | 103.98 | WT | K[R]GQSLFAAL  | 10826.42 | 10 | 10.75632 |
| Se119 | FRMD8 R152L    | HLA-A*24:02 | MT | SFLPAHLCK[R]  | 453.25 | WT | SFLPAHLCK[R]  | 12363.25 | 10 | 10.75632 |
| Se119 | R3HDM2 M724I   | HLA-B*35:01 | MT | [I]VQWSHCKY   | 326.08 | WT | [M]VQWSHCKY   | 21.99    | 9  | 10.19345 |
| Se119 | R3HDM2 M724I   | HLA-B*35:01 | MT | NPS[I]VQWSH   | 354.71 | WT | NPS[M]VQWSH   | 438.26   | 9  | 10.19345 |
| Se119 | TBC1D15 M145I  | HLA-B*40:02 | MT | KEG[I]GWSYLV  | 96.6   | WT | KEG[M]GWSYLV  | 86.52    | 10 | 8.03269  |
| Se119 | TBC1D15 M145I  | HLA-B*40:02 | MT | KEG[I]GWSYL   | 100.62 | WT | KEG[M]GWSYL   | 94.59    | 9  | 8.03269  |
| Se119 | TBC1D15 M145I  | HLA-B*35:01 | MT | EG[I]GWSYLVF  | 238.28 | WT | EG[M]GWSYLVF  | 149.83   | 10 | 8.03269  |
| Se119 | TBC1D15 M145I  | HLA-A*02:06 | MT | EG[I]GWSYLV   | 238.79 | WT | EG[M]GWSYLV   | 176.28   | 9  | 8.03269  |
| Se119 | SEL1L L9V      | HLA-A*02:06 | MT | [V]LLCAVLLSL  | 52.38  | WT | [L]LLCAVLLSL  | 41.82    | 10 | 17.67881 |
| Se119 | SEL1L L9V      | HLA-A*02:06 | MT | GLT[V]LLCAV   | 133.8  | WT | GLT[L]LLCAV   | 143.8    | 9  | 17.67881 |
| Se119 | CACNA1H G712C  | HLA-C*03:03 | MT | RALEDPE[C]JEL | 103.88 | WT | RALEDPE[G]JEL | 141.67   | 10 | 1.14006  |
| Se119 | CACNA1H G712C  | HLA-C*03:04 | MT | RALEDPE[C]JEL | 103.88 | WT | RALEDPE[G]JEL | 141.67   | 10 | 1.14006  |
| Se119 | ZNF574 K506E   | HLA-A*02:06 | MT | KMFK[E]KSHV   | 146.9  | WT | KMFK[K]KSHV   | 317.23   | 9  | 6.76679  |
| Se119 | ZNF574 K506E   | HLA-B*40:02 | MT | K[E]KSHVRNHL  | 183.68 | WT | K[K]KSHVRNHL  | 11356.83 | 10 | 6.76679  |
| Se119 | C20orf27 G178A | HLA-A*02:06 | MT | MLLD[G]VKCV   | 15.12  | WT | MLLD[J]VKCV   | 13.97    | 9  | 30.52502 |
| Se119 | C20orf27 G178A | HLA-A*02:06 | MT | GTPMLLD[A]V   | 362.5  | WT | GTPMLLD[G]V   | 405.2    | 9  | 30.52502 |
| Se119 | KCNG1 A441V    | HLA-A*02:06 | MT | [V]LSSILSGI   | 76.73  | WT | [A]LSSILSGI   | 40.93    | 9  | 1.42093  |
| Se119 | KCNG1 A441V    | HLA-A*02:06 | MT | V[V]LSSILSGI  | 77.57  | WT | V[A]LSSILSGI  | 370.66   | 10 | 1.42093  |
| Se119 | KCNG1 A441V    | HLA-A*02:06 | MT | GQVV[V]LSSI   | 124.67 | WT | GQVV[A]LSSI   | 97.33    | 9  | 1.42093  |
| Se119 | KCNG1 A441V    | HLA-B*40:02 | MT | GQVV[V]LSSI   | 210.61 | WT | GQVV[A]LSSI   | 332.61   | 9  | 1.42093  |
| Se119 | KCNG1 A441V    | HLA-B*40:02 | MT | GQVV[V]LSSIL  | 284.09 | WT | GQVV[A]LSSIL  | 425.3    | 10 | 1.42093  |
| Se119 | KCNG1 A441V    | HLA-C*03:03 | MT | RSTPGQVV[V]L  | 297.22 | WT | RSTPGQVV[A]L  | 185.1    | 10 | 1.42093  |
| Se119 | KCNG1 A441V    | HLA-C*03:04 | MT | RSTPGQVV[V]L  | 297.22 | WT | RSTPGQVV[A]L  | 185.1    | 10 | 1.42093  |
| Se119 | KCNG1 A441S    | HLA-A*02:06 | MT | [S]LSSILSGI   | 59.45  | WT | [A]LSSILSGI   | 40.93    | 9  | 1.42093  |
| Se119 | KCNG1 A441S    | HLA-A*02:06 | MT | GQVV[S]LSSI   | 164.28 | WT | GQVV[A]LSSI   | 97.33    | 9  | 1.42093  |
| Se119 | KCNG1 A441S    | HLA-C*03:03 | MT | RSTPGQVV[S]L  | 216.53 | WT | RSTPGQVV[A]L  | 185.1    | 10 | 1.42093  |
| Se119 | KCNG1 A441S    | HLA-C*03:04 | MT | RSTPGQVV[S]L  | 216.53 | WT | RSTPGQVV[A]L  | 185.1    | 10 | 1.42093  |
| Se119 | KCNG1 A441S    | HLA-B*40:02 | MT | GQVV[S]LSSI   | 337.06 | WT | GQVV[A]LSSI   | 332.61   | 9  | 1.42093  |
| Se119 | KCNG1 A441S    | HLA-C*03:03 | MT | QVV[S]LSSIL   | 420.36 | WT | QVV[A]LSSIL   | 406.5    | 9  | 1.42093  |
| Se119 | KCNG1 A441S    | HLA-C*03:04 | MT | QVV[S]LSSIL   | 420.36 | WT | QVV[A]LSSIL   | 406.5    | 9  | 1.42093  |
| Se119 | KCNG1 A441S    | HLA-B*40:02 | MT | GQVV[S]LSSIL  | 470.6  | WT | GQVV[A]LSSIL  | 425.3    | 10 | 1.42093  |
| Se119 | PRDM15 S267I   | HLA-A*02:06 | MT | SLPPG[I]QSEA  | 295.51 | WT | SLPPG[S]QSEA  | 1107.3   | 10 | 2.52069  |
| Se119 | PRDM15 S267I   | HLA-A*02:06 | MT | EQAKSLPPG[I]  | 495.83 | WT | EQAKSLPPG[S]  | 13667.45 | 10 | 2.52069  |
| Se120 | ALDH4A1 R10G   | HLA-B*35:01 | MT | LPAPALR[G]AL  | 38.71  | WT | LPAPALR[R]AL  | 46.32    | 10 | 6.77243  |
| Se120 | ZZZ3 S367Y     | HLA-B*35:01 | MT | [Y]LSEPQEHRY  | 198.31 | WT | [S]LSEPQEHRY  | 1851.58  | 10 | 20.95429 |
| Se120 | TANC1 A1036V   | HLA-C*03:03 | MT | Q[V]LTAASAM   | 276.99 | WT | Q[A]LTAASAM   | 38.88    | 9  | 10.38317 |
| Se120 | TANC1 A1036V   | HLA-B*35:01 | MT | Q[V]LTAASAM   | 302.42 | WT | Q[A]LTAASAM   | 73.27    | 9  | 10.38317 |
| Se120 | TANC1 A1036V   | HLA-B*35:01 | MT | HALQQ[V]LTAA  | 422.15 | WT | HALQQ[A]LTAA  | 349.1    | 10 | 10.38317 |
| Se120 | ATG4B R90P     | HLA-C*03:03 | MT | FAQALVC[P]JHL | 26.07  | WT | FAQALVC[R]JHL | 31.69    | 10 | 20.68699 |
| Se120 | ATG4B R90P     | HLA-B*35:01 | MT | FAQALVC[P]JH  | 93.84  | WT | FAQALVC[R]JH  | 1744.21  | 9  | 20.68699 |
| Se120 | TTC33 R46H     | HLA-C*03:03 | MT | HAIK[H]RKEIL  | 146.41 | WT | HAIK[R]RKEIL  | 272.59   | 10 | 2.92766  |
| Se120 | TTC33 R46H     | HLA-C*03:03 | MT | HAIK[H]RKEI   | 352.79 | WT | HAIK[R]RKEI   | 721.42   | 9  | 2.92766  |
| Se120 | SKIV2L2 H810Y  | HLA-B*35:01 | MT | HPL[Y]NDPNL   | 140.7  | WT | HPL[H]NDPNL   | 189.1    | 9  | 17.73998 |
| Se120 | SLC35B2 F73L   | HLA-C*03:03 | MT | [L]VSFPTQVL   | 59.05  | WT | [F]VSFPTQVL   | 6.59     | 9  | 89.96051 |

|       |                |             |    |               |        |    |              |          |    |           |
|-------|----------------|-------------|----|---------------|--------|----|--------------|----------|----|-----------|
| Se120 | SLC35B2 F73L   | HLA-A*24:02 | MT | QYEALK[L]VSFL | 145.53 | WT | QYEALK[F]VSF | 77.63    | 10 | 89.96051  |
| Se120 | SLC35B2 F73L   | HLA-C*03:03 | MT | K[L]VSFPTQVL  | 351.63 | WT | K[F]VSFPTQVL | 2478.88  | 10 | 89.96051  |
| Se120 | NOM1 C697Y     | HLA-A*26:01 | MT | EIIHVLMDC[Y]  | 17.05  | WT | EIIHVLMDC[C] | 9132.61  | 10 | 5.14356   |
| Se120 | NOM1 C697Y     | HLA-C*03:03 | MT | [Y]LQEKTYNPF  | 193.1  | WT | [C]LQEKTYNPF | 4693     | 10 | 5.14356   |
| Se120 | NOM1 C697Y     | HLA-A*24:02 | MT | [Y]LQEKTYNPF  | 214.86 | WT | [C]LQEKTYNPF | 536.85   | 10 | 5.14356   |
| Se120 | NOM1 C697Y     | HLA-B*35:01 | MT | [Y]LQEKTYNPF  | 281.72 | WT | [C]LQEKTYNPF | 2675.02  | 10 | 5.14356   |
| Se120 | NOM1 C697Y     | HLA-B*35:01 | MT | EIIHVLMDC[Y]  | 349.89 | WT | EIIHVLMDC[C] | 35194.07 | 10 | 5.14356   |
| Se120 | KAT6A V1188I   | HLA-B*35:01 | MT | MPVSTQAC[I]   | 37.41  | WT | MPVSTQAC[V]  | 30.19    | 9  | 12.38895  |
| Se120 | KAT6A V1188I   | HLA-B*35:01 | MT | MPVSTQAC[I]I  | 42.19  | WT | MPVSTQAC[V]I | 27.14    | 10 | 12.38895  |
| Se120 | SULF1 H182Y    | HLA-B*35:01 | MT | [Y]GFDYAKDY   | 190.69 | WT | [H]GFDYAKDY  | 798.24   | 9  | 5.41244   |
| Se120 | SULF1 H182Y    | HLA-B*35:01 | MT | [Y]GFDYAKDYF  | 448.7  | WT | [H]GFDYAKDYF | 1562.69  | 10 | 5.41244   |
| Se120 | FAM175B R282Q  | HLA-C*03:03 | MT | FSP[Q]MPSSGF  | 268.65 | WT | FSP[R]MPSSGF | 339.85   | 10 | 11.71531  |
| Se120 | FAM175B R282Q  | HLA-B*35:01 | MT | SP[Q]MPSSGF   | 329.04 | WT | SP[R]MPSSGF  | 810.38   | 9  | 11.71531  |
| Se120 | FAM175B R282Q  | HLA-C*03:03 | MT | SLDPAFSP[Q]M  | 378.22 | WT | SLDPAFSP[R]M | 562.42   | 10 | 11.71531  |
| Se120 | PIK3C2A V528M  | HLA-B*35:01 | MT | TP[M]DLNKHLY  | 12.57  | WT | TP[V]DLNKHLY | 20.72    | 10 | 16.12213  |
| Se120 | PIK3C2A V528M  | HLA-C*03:03 | MT | RTAEDDETP[M]  | 151.94 | WT | RTAEDDETP[V] | 1195.43  | 10 | 16.12213  |
| Se120 | PIK3C2A V528M  | HLA-B*35:01 | MT | TAEDDETP[M]   | 197.4  | WT | TAEDDETP[V]  | 6364.64  | 9  | 16.12213  |
| Se120 | NCAPD3 D1135G  | HLA-B*35:01 | MT | LPL[G]LDASEL  | 38.41  | WT | LPL[D]LDASEL | 33.19    | 10 | 7.76346   |
| Se120 | NCAPD3 D1135G  | HLA-C*03:03 | MT | FADGILPL[G]L  | 38.91  | WT | FADGILPL[D]L | 50.75    | 10 | 7.76346   |
| Se120 | NCAPD3 D1135G  | HLA-C*08:01 | MT | FADGILPL[G]L  | 65.91  | WT | FADGILPL[D]L | 74.21    | 10 | 7.76346   |
| Se120 | TIMELESS R515Q | HLA-A*24:02 | MT | LFLKMLE[Q]F   | 49.28  | WT | LFLKMLE[R]F  | 51.78    | 9  | 27.46669  |
| Se120 | FZD10 R443H    | HLA-C*03:03 | MT | MV[H]IGLFSVL  | 138.55 | WT | MV[R]IGLFSVL | 583.08   | 10 | 11.8341   |
| Se120 | NFATC4 P127L   | HLA-C*03:03 | MT | TSISPTPE[P]   | 57.95  | WT | TSISPTPE[P]  | 27343.08 | 9  | 2.50046   |
| Se120 | NFATC4 P127L   | HLA-B*35:01 | MT | SPTPE[L]PAAL  | 126.3  | WT | SPTPE[P]PAAL | 204.2    | 10 | 2.50046   |
| Se120 | NFATC4 P127L   | HLA-C*03:03 | MT | ITSISPTPE[L]  | 140.33 | WT | ITSISPTPE[P] | 30787.92 | 10 | 2.50046   |
| Se120 | SPTB P1197Q    | HLA-C*03:03 | MT | LAHLEP[Q]DSL  | 114.25 | WT | LAHLEP[P]DSL | 92.06    | 10 | 1.8271    |
| Se120 | SHCBP1 S337C   | HLA-C*03:03 | MT | ITHVVS[C]TM   | 102.01 | WT | ITHVVS[S]TM  | 69.14    | 9  | 1.70358   |
| Se120 | SHCBP1 S337C   | HLA-C*03:03 | MT | ITHVVS[C]TMM  | 377.57 | WT | ITHVVS[S]TMM | 178.7    | 10 | 1.70358   |
| Se120 | SHCBP1 S337C   | HLA-C*03:03 | MT | VVS[C]TMMAGL  | 492.8  | WT | VVS[S]TMMAGL | 365.41   | 10 | 1.70358   |
| Se120 | GPS2 D107H     | HLA-B*35:01 | MT | [H]LTLTSAAY   | 33.51  | WT | [D]LTLTSAAY  | 100.86   | 10 | 13.5662   |
| Se120 | NF1 T1951S     | HLA-C*03:03 | MT | [S]AILDKLITM  | 50.43  | WT | [T]AILDKLITM | 68.31    | 10 | 14.30734  |
| Se120 | NF1 T1951S     | HLA-B*35:01 | MT | [S]AILDKLITM  | 382.71 | WT | [T]AILDKLITM | 232.86   | 10 | 14.30734  |
| Se120 | PCTP F104L     | HLA-A*24:02 | MT | YY[F]DNPGGQI  | 117.58 | WT | YY[F]DNPGGQI | 191.51   | 10 | 14.35037  |
| Se120 | RGS9 S554N     | HLA-C*03:03 | MT | SVTES[N]EASL  | 205.37 | WT | SVTES[S]EASL | 171.2    | 10 | 1.11989   |
| Se120 | SIGLEC15 S178I | HLA-B*35:01 | MT | [I]PAHAFRAL   | 25.12  | WT | [S]PAHAFRAL  | 44.84    | 9  | 1.02214   |
| Se120 | SIGLEC15 S178I | HLA-C*03:03 | MT | IVNISVLP[I]   | 184.09 | WT | IVNISVLP[S]  | 13333.2  | 9  | 1.02214   |
| Se120 | SIGLEC15 S178I | HLA-B*35:01 | MT | LP[I]PAHAFA   | 209.66 | WT | LP[S]PAHAFA  | 334.89   | 10 | 1.02214   |
| Se120 | SIGLEC15 S178I | HLA-B*35:01 | MT | SVLP[I]PAHAF  | 239.86 | WT | SVLP[S]PAHAF | 134.78   | 10 | 1.02214   |
| Se120 | SIGLEC15 S178I | HLA-C*03:03 | MT | [I]PAHAFRAL   | 340.73 | WT | [S]PAHAFRAL  | 371.94   | 9  | 1.02214   |
| Se120 | SIGLEC15 S178I | HLA-C*03:03 | MT | SVLP[I]PAHAF  | 406.73 | WT | SVLP[S]PAHAF | 171.73   | 10 | 1.02214   |
| Se120 | ZNF837 E461V   | HLA-C*03:03 | MT | KTFRGCS[V]L   | 150.82 | WT | KTFRGCS[E]L  | 161.68   | 9  | 1.09794   |
| Se120 | MYH7B Y175N    | HLA-A*26:01 | MT | [N]TASVVAAY   | 10.24  | WT | [Y]TASVVAAY  | 4.98     | 9  | 1.61478   |
| Se120 | MYH7B Y175N    | HLA-B*35:01 | MT | [N]TASVVAAY   | 11.82  | WT | [Y]TASVVAAY  | 4.3      | 9  | 1.61478   |
| Se120 | MYH7B Y175N    | HLA-B*35:01 | MT | LPV[N]TASVV   | 54.42  | WT | LPV[Y]TASVV  | 43.47    | 9  | 1.61478   |
| Se120 | MYH7B Y175N    | HLA-B*35:01 | MT | LPV[N]TASVVA  | 55.77  | WT | LPV[Y]TASVVA | 46.55    | 10 | 1.61478   |
| Se120 | RPN2 G57V      | HLA-C*03:03 | MT | YSIV[G]LSSL   | 9.73   | WT | YSIV[G]LSSL  | 5.23     | 9  | 172.743   |
| Se120 | RPN2 G57V      | HLA-C*03:03 | MT | SAFYSIV[V]L   | 12.34  | WT | SAFYSIV[G]L  | 27.07    | 9  | 172.743   |
| Se120 | RPN2 G57V      | HLA-B*40:06 | MT | LESAFYSIV[V]  | 126.1  | WT | LESAFYSIV[G] | 4366.49  | 10 | 172.743   |
| Se120 | RPN2 G57V      | HLA-A*24:02 | MT | FYSIV[V]LSSL  | 150.03 | WT | FYSIV[G]LSSL | 286.86   | 10 | 172.743   |
| Se121 | GNL2 R355P     | HLA-A*31:01 | MT | WQYITLM[P]R   | 46.52  | WT | WQYITLM[R]R  | 87.43    | 9  | 31.69561  |
| Se121 | GNL2 R355P     | HLA-A*31:01 | MT | VWQYITLM[P]R  | 56.81  | WT | VWQYITLM[R]R | 80.07    | 10 | 31.69561  |
| Se121 | GNL2 R355P     | HLA-B*40:02 | MT | WQYITLM[P]RI  | 95.02  | WT | WQYITLM[R]RI | 220.5    | 10 | 31.69561  |
| Se121 | GNL2 R355P     | HLA-C*03:04 | MT | YITLM[P]RIFL  | 307.54 | WT | YITLM[R]RIFL | 691.18   | 10 | 31.69561  |
| Se121 | GNL2 R355P     | HLA-A*11:01 | MT | WQYITLM[P]R   | 392.73 | WT | WQYITLM[R]R  | 896.53   | 9  | 31.69561  |
| Se121 | GNL2 R355P     | HLA-C*03:04 | MT | YITLM[P]RIF   | 496.41 | WT | YITLM[R]RIF  | 1116.99  | 9  | 31.69561  |
| Se121 | SLC44A5 R351Q  | HLA-A*11:01 | MT | RI[Q]VAIILLK  | 38.94  | WT | RI[R]VAIILLK | 105.32   | 10 | 1.60925   |
| Se121 | SLC44A5 R351Q  | HLA-A*11:01 | MT | I[Q]VAIILLK   | 55.59  | WT | I[R]VAIILLK  | 6407.62  | 9  | 1.60925   |
| Se121 | SLC44A5 R351Q  | HLA-A*31:01 | MT | RI[Q]VAIILLK  | 258.12 | WT | RI[R]VAIILLK | 94.45    | 10 | 1.60925   |
| Se121 | ITSN2 D614H    | HLA-B*40:02 | MT | SEM[H]SFNNQL  | 17.44  | WT | SEM[D]SFNNQL | 18.05    | 10 | 4.77952   |
| Se121 | ITSN2 D614H    | HLA-A*11:01 | MT | EM[H]SFNNQLK  | 222.98 | WT | EM[D]SFNNQLK | 351.07   | 10 | 4.77952   |
| Se121 | ITSN2 D614H    | HLA-B*15:01 | MT | ASKLSEM[H]SF  | 284.29 | WT | ASKLSEM[D]SF | 923.07   | 10 | 4.77952   |
| Se121 | HARS N120T     | HLA-C*03:04 | MT | KVYRRD[T]PAM  | 95.2   | WT | KVYRRD[N]PAM | 162.07   | 10 | 15.21724  |
| Se121 | HARS N120T     | HLA-B*15:01 | MT | KVYRRD[T]PAM  | 349.16 | WT | KVYRRD[N]PAM | 589.58   | 10 | 15.21724  |
| Se121 | PCDHGA6 D426H  | HLA-C*03:04 | MT | TAT[H]KGTPLL  | 38.38  | WT | TAT[D]KGTPLL | 29.95    | 10 | 4.738     |
| Se121 | PCDHGA6 D426H  | HLA-C*03:04 | MT | AT[H]KGTPLL   | 106.64 | WT | AT[D]KGTPLL  | 287.69   | 9  | 4.738     |
| Se121 | ZSCAN16 K318I  | HLA-B*15:01 | MT | RIHTGE[I]PY   | 218.41 | WT | RIHTGE[K]PY  | 399.7    | 9  | 7.50105   |
| Se121 | ATF6B L119H    | HLA-A*11:01 | MT | GVGEV[H]HVK   | 81.54  | WT | GVGEV[L]HVK  | 70.07    | 9  | 127.42896 |
| Se121 | KMT2C A1590T   | HLA-B*15:01 | MT | FSAI[T]QSSY   | 25.18  | WT | FSAI[A]QSSY  | 24.05    | 9  | 8.21177   |
| Se121 | KMT2C A1590T   | HLA-A*31:01 | MT | I[T]QSSYPDAR  | 145.88 | WT | I[A]QSSYPDAR | 476.54   | 10 | 8.21177   |
| Se121 | KMT2C A1590T   | HLA-C*03:04 | MT | FSAI[T]QSSY   | 390.94 | WT | FSAI[A]QSSY  | 291.7    | 9  | 8.21177   |
| Se121 | HAUS6 S484T    | HLA-A*11:01 | MT | [T]AFGGSLPAK  | 20.82  | WT | [S]AFGGSLPAK | 12.37    | 10 | 7.48812   |
| Se121 | HAUS6 S484T    | HLA-C*03:04 | MT | [T]AFGGSLPA   | 40.02  | WT | [S]AFGGSLPA  | 31.82    | 9  | 7.48812   |
| Se121 | HAUS6 S484T    | HLA-B*40:02 | MT | TES[T]AFGGSL  | 117.28 | WT | TES[S]AFGGSL | 90.16    | 10 | 7.48812   |
| Se121 | HAUS6 S484T    | HLA-B*15:01 | MT | VAKNTES[T]AF  | 127.97 | WT | VAKNTES[S]AF | 101.11   | 10 | 7.48812   |
| Se121 | CELF2 G40R     | HLA-A*31:01 | MT | [R]JAVYQINVL  | 19.9   | WT | [G]JAVYQINVL | 156.31   | 10 | 1.93321   |
| Se121 | CELF2 G40R     | HLA-C*03:04 | MT | [R]JAVYQINVL  | 32.8   | WT | [G]JAVYQINVL | 171.35   | 9  | 1.93321   |
| Se121 | CELF2 G40R     | HLA-B*40:02 | MT | KELFEPY[R]AV  | 48.08  | WT | KELFEPY[G]AV | 48.5     | 10 | 1.93321   |
| Se121 | CELF2 G40R     | HLA-B*15:01 | MT | ELFEPY[R]AVY  | 92.62  | WT | ELFEPY[G]AVY | 60.52    | 10 | 1.93321   |

|       |                 |             |    |               |        |    |               |          |    |          |
|-------|-----------------|-------------|----|---------------|--------|----|---------------|----------|----|----------|
| Se121 | CEL2F G40R      | HLA-A*31:01 | MT | ELKELFEPY[R]  | 138.02 | WT | ELKELFEPY[G]  | 29108.61 | 10 | 1.93321  |
| Se121 | CEL2F G40R      | HLA-B*40:02 | MT | FEPY[R]AVYQI  | 269.68 | WT | FEPY[G]AVYQI  | 188.53   | 10 | 1.93321  |
| Se121 | CEL2F G40R      | HLA-A*11:01 | MT | [R]AVYQINVLRL | 413.04 | WT | [G]AVYQINVLRL | 1087.26  | 10 | 1.93321  |
| Se121 | CEL2F G40R      | HLA-B*40:02 | MT | KELFEPY[R]A   | 422.88 | WT | KELFEPY[G]A   | 310.13   | 9  | 1.93321  |
| Se121 | PARPBP L393F    | HLA-A*31:01 | MT | GTSILT[F]FR   | 12.52  | WT | GTSILT[L]FR   | 41.36    | 9  | 4.90529  |
| Se121 | PARPBP L393F    | HLA-A*31:01 | MT | HGTSILT[F]FR  | 20.88  | WT | HGTSILT[L]FR  | 51.33    | 10 | 4.90529  |
| Se121 | PARPBP L393F    | HLA-A*11:01 | MT | GTSILT[F]FR   | 24.97  | WT | GTSILT[L]FR   | 27.26    | 9  | 4.90529  |
| Se121 | PLCB2 R762H     | HLA-C*03:04 | MT | FLGH[H]IPI    | 460.8  | WT | FLGH[R]IPI    | 813.92   | 9  | 1.63796  |
| Se121 | ANKFY1 D284H    | HLA-C*03:04 | MT | YLIEM[H]SQL   | 42.21  | WT | YLIEM[D]SQL   | 64.88    | 9  | 19.63525 |
| Se121 | ANKFY1 D284H    | HLA-B*15:01 | MT | YLIEM[H]SQL   | 390.8  | WT | YLIEM[D]SQL   | 540.25   | 9  | 19.63525 |
| Se121 | ANKFY1 D284H    | HLA-B*40:02 | MT | IEM[H]SQLPG   | 426.11 | WT | IEM[D]SQLPG   | 417.09   | 9  | 19.63525 |
| Se121 | TP53 H61R       | HLA-A*31:01 | MT | [R]LIRVEGNLR  | 36.76  | WT | [H]LIRVEGNLR  | 104.76   | 10 | 56.64522 |
| Se121 | TP53 H61R       | HLA-A*31:01 | MT | GLAPPQ[R]LIR  | 243.65 | WT | GLAPPQ[H]LIR  | 157.36   | 10 | 56.64522 |
| Se122 | ACSL1 M291V     | HLA-A*02:06 | MT | H[V]FERVVECV  | 21.32  | WT | H[M]FERVVECV  | 10.62    | 10 | 20.80311 |
| Se122 | ACSL1 M291V     | HLA-A*02:06 | MT | ISFLPLAH[V]   | 61.46  | WT | ISFLPLAH[M]   | 2145.66  | 9  | 20.80311 |
| Se122 | ACSL1 M291V     | HLA-A*02:06 | MT | LISFLPLAH[V]  | 78.24  | WT | LISFLPLAH[M]  | 1162.95  | 10 | 20.80311 |
| Se122 | ACSL1 M291V     | HLA-A*02:13 | MT | LISFLPLAH[V]  | 86.58  | WT | LISFLPLAH[M]  | 3412.4   | 10 | 20.80311 |
| Se122 | ACSL1 M291V     | HLA-B*59:01 | MT | LPLAH[V]FERV  | 215.47 | WT | LPLAH[M]FERV  | 248.1    | 10 | 20.80311 |
| Se122 | ACSL1 M291V     | HLA-A*02:13 | MT | H[V]FERVVECV  | 278.87 | WT | H[M]FERVVECV  | 10.43    | 10 | 20.80311 |
| Se122 | ACSL1 M291V     | HLA-A*02:06 | MT | H[V]FERVVECV  | 433.79 | WT | H[M]FERVVECV  | 119.54   | 9  | 20.80311 |
| Se122 | SLC35A4 G72A    | HLA-A*02:06 | MT | FSLLV[A]WQA   | 147.77 | WT | FSLLV[G]WQA   | 270.88   | 9  | 23.54681 |
| Se122 | CDK14 D226G     | HLA-A*02:06 | MT | [G]TWPVGHSL   | 39.44  | WT | [D]TWPVGHSL   | 549.78   | 9  | 8.91042  |
| Se122 | AQP3 A44V       | HLA-A*02:13 | MT | VMFPGCGSV[V]  | 13.25  | WT | VMFPGCGSV[A]  | 65.08    | 9  | 7.56361  |
| Se122 | AQP3 A44V       | HLA-A*02:06 | MT | VMFPGCGSV[V]  | 59.05  | WT | VMFPGCGSV[A]  | 267.08   | 9  | 7.56361  |
| Se122 | AQP3 A44V       | HLA-A*02:06 | MT | LVMFPGCGSV[V] | 95.71  | WT | LVMFPGCGSV[A] | 499.83   | 10 | 7.56361  |
| Se122 | AQP3 A44V       | HLA-A*02:13 | MT | LVMFPGCGSV[V] | 145.53 | WT | LVMFPGCGSV[A] | 1186.08  | 10 | 7.56361  |
| Se122 | VAV2 P617L      | HLA-A*02:13 | MT | S[L]WVEGRLV   | 148.47 | WT | S[P]WVEGRLV   | 27104.19 | 9  | 11.02223 |
| Se122 | VAV2 P617L      | HLA-A*02:06 | MT | S[L]WVEGRLV   | 229.43 | WT | S[P]WVEGRLV   | 8186.89  | 9  | 11.02223 |
| Se122 | PIK3C2A L435I   | HLA-A*02:06 | MT | FQ[I]PVVFTFC  | 40.14  | WT | FQ[L]PVVFTFC  | 52.4     | 9  | 5.42223  |
| Se122 | PIK3C2A L435I   | HLA-A*02:06 | MT | IDIEGFQ[I]PV  | 411.59 | WT | IDIEGFQ[L]PV  | 374.58   | 10 | 5.42223  |
| Se122 | ZNF646 Q349H    | HLA-A*02:06 | MT | [H]MLNGSAEL   | 46.44  | WT | [Q]MLNGSAEL   | 52.47    | 9  | 3.77447  |
| Se122 | ZNF646 Q349H    | HLA-A*02:13 | MT | [H]MLNGSAEL   | 53.49  | WT | [Q]MLNGSAEL   | 86.99    | 9  | 3.77447  |
| Se122 | PPP4R1 S648T    | HLA-A*02:06 | MT | Y[T]LPGVALT   | 9.82   | WT | Y[S]LPGVALT   | 40.69    | 10 | 16.73278 |
| Se122 | PPP4R1 S648T    | HLA-A*02:06 | MT | Y[T]LPGVALT   | 84.96  | WT | Y[S]LPGVALT   | 396.9    | 9  | 16.73278 |
| Se122 | PPP4R1 S648T    | HLA-A*02:06 | MT | [T]LPGVALT    | 272.68 | WT | [S]LPGVALT    | 304.95   | 9  | 16.73278 |
| Se122 | KLK8 R106H      | HLA-A*02:06 | MT | GVTNLC[H]YL   | 135.92 | WT | GVTNLC[R]YL   | 917.6    | 10 | 16.81575 |
| Se123 | GPR153 H129Q    | HLA-C*03:04 | MT | QAV[Q]TVMGI   | 489.48 | WT | QAV[H]TVMGI   | 462.14   | 9  | 7.09557  |
| Se123 | EIF3I K17M      | HLA-A*24:02 | MT | [M]YNREGDLLF  | 23.05  | WT | [K]YNREGDLLF  | 45.63    | 10 | 85.73384 |
| Se123 | EIF3I K17M      | HLA-B*40:02 | MT | HERSITQ[I]K   | 162.13 | WT | HERSITQ[K]K   | 7260.79  | 9  | 85.73384 |
| Se123 | EIF3I K17M      | HLA-A*24:02 | MT | [M]YNREGDLL   | 398.14 | WT | [K]YNREGDLL   | 986.6    | 9  | 85.73384 |
| Se123 | DHCR24 M476R    | HLA-A*24:02 | MT | CY[R]NREEFW   | 192.49 | WT | CY[M]NREEFW   | 18.72    | 9  | 41.54257 |
| Se123 | GBP4 D347E      | HLA-C*03:04 | MT | RAA[E]HYSQQM  | 28.95  | WT | RAA[D]HYSQQM  | 32.06    | 10 | 11.37174 |
| Se123 | GBP4 D347E      | HLA-B*40:02 | MT | A[E]HYSQQMA   | 162.19 | WT | A[D]HYSQQMA   | 10492.76 | 9  | 11.37174 |
| Se123 | TGFBR3 E442D    | HLA-B*40:02 | MT | REPE[D]VQGSV  | 395.87 | WT | REPE[E]VQGSV  | 313.72   | 10 | 3.11299  |
| Se123 | OTUD7B F359Y    | HLA-C*03:04 | MT | QAH[Y]SALVSM  | 54.12  | WT | QAH[F]SALVSM  | 76.75    | 10 | 4.86829  |
| Se123 | OTUD7B F359Y    | HLA-B*15:18 | MT | AH[Y]SALVSM   | 169.38 | WT | AH[F]SALVSM   | 207.56   | 9  | 4.86829  |
| Se123 | OTUD7B F359Y    | HLA-B*40:02 | MT | YDQAH[Y]SAL   | 200.31 | WT | YDQAH[F]SAL   | 119.58   | 9  | 4.86829  |
| Se123 | OTUD7B F359Y    | HLA-C*03:04 | MT | LAYDQAH[Y]SA  | 427.9  | WT | LAYDQAH[F]SA  | 449.8    | 10 | 4.86829  |
| Se123 | ARNT P286L      | HLA-B*40:02 | MT | GE[L]HFVVVHC  | 167.97 | WT | GE[P]HFVVVHC  | 2206.72  | 10 | 11.75719 |
| Se123 | ARNT P286L      | HLA-B*40:02 | MT | GE[L]HFVVVHC  | 305.84 | WT | GE[P]HFVVVHC  | 2324.92  | 9  | 11.75719 |
| Se123 | TMEM63A F210V   | HLA-C*03:04 | MT | YLFLT[VG]VJM  | 119.98 | WT | YLFLT[VG]FJM  | 742.3    | 9  | 11.84544 |
| Se123 | RAB10 Q68E      | HLA-B*40:02 | MT | G[E]JERFHITTT | 295.05 | WT | G[Q]JERFHITTT | 5633.72  | 10 | 48.06869 |
| Se123 | RAB10 Q68E      | HLA-B*40:02 | MT | G[E]JERFHITTT | 435.33 | WT | G[Q]JERFHITTT | 6231.96  | 9  | 48.06869 |
| Se123 | DNAJC10 V532L   | HLA-A*24:02 | MT | [L]WVDFYSPW   | 38.64  | WT | [V]WVDFYSPW   | 25.15    | 10 | 50.39384 |
| Se123 | NEMP2 N90T      | HLA-B*15:18 | MT | YIAERH[T]CQY  | 469.46 | WT | YIAERH[N]CQY  | 778.93   | 10 | 2.42283  |
| Se123 | BARD1 Q430E     | HLA-B*40:02 | MT | L[Q]NGSDPNV   | 484.56 | WT | L[Q]NGSDPNV   | 6573.34  | 9  | 2.78897  |
| Se123 | ROBO2 L50M      | HLA-C*03:04 | MT | IVSKGEPTT[M]  | 120.81 | WT | IVSKGEPTT[L]  | 146.77   | 10 | 1.83111  |
| Se123 | NSUN7 C476F     | HLA-A*24:02 | MT | RLSPPV[L]P[F] | 328.18 | WT | RLSPPV[L]P[C] | 25604.76 | 10 | 1.4026   |
| Se123 | NSUN7 C476F     | HLA-A*24:02 | MT | LSPPV[L]P[F]  | 435.09 | WT | LSPPV[L]P[C]  | 21540.88 | 9  | 1.4026   |
| Se123 | SLC10A7 P27T    | HLA-C*03:04 | MT | [T]SIGVNGGPL  | 86.04  | WT | [P]SIGVNGGPL  | 3682.96  | 10 | 2.31898  |
| Se123 | ELL2 M1L        | HLA-C*03:04 | MT | [L]AAGGTGGL   | 48.19  | WT | [M]AAGGTGGL   | 18.87    | 9  | 4.47691  |
| Se123 | MCC I388M       | HLA-C*03:04 | MT | TLYSHGSA[M]   | 24.81  | WT | TLYSHGSA[I]   | 177.79   | 9  | 2.74282  |
| Se123 | MCC I388M       | HLA-B*15:18 | MT | TLYSHGSA[M]   | 116.81 | WT | TLYSHGSA[I]   | 2701.21  | 9  | 2.74282  |
| Se123 | MCC I388M       | HLA-C*03:04 | MT | QTLYSHGSA[M]  | 323.23 | WT | QTLYSHGSA[I]  | 1183.47  | 10 | 2.74282  |
| Se123 | MLLT4 Q806H     | HLA-B*40:02 | MT | RQ[H]LGHEAW   | 181.87 | WT | RQ[Q]LGHEAW   | 384.6    | 10 | 11.97665 |
| Se123 | MLLT4 Q806H     | HLA-A*24:02 | MT | YWGAIHQ[H]L   | 205.91 | WT | YWGAIHQ[Q]L   | 207.46   | 10 | 11.97665 |
| Se123 | C7orf26 L21W    | HLA-B*40:02 | MT | KEV[W]YHLDI   | 29.38  | WT | KEV[L]YHLDI   | 45.41    | 9  | 17.20064 |
| Se123 | C7orf26 L21W    | HLA-A*24:02 | MT | V[W]YHLDIYF   | 190.37 | WT | V[L]YHLDIYF   | 5085.75  | 9  | 17.20064 |
| Se123 | C7orf26 L21W    | HLA-C*03:04 | MT | SAAKEV[W]YHL  | 232.93 | WT | SAAKEV[L]YHL  | 156.3    | 10 | 17.20064 |
| Se123 | AGR3 P124R      | HLA-C*03:04 | MT | RIMFVD[R]SL   | 168.64 | WT | RIMFVD[P]SL   | 224.47   | 9  | 3.79324  |
| Se123 | AGR3 P124R      | HLA-C*03:04 | MT | MFVD[R]SLTV   | 430.53 | WT | MFVD[P]SLTV   | 460.77   | 9  | 3.79324  |
| Se123 | VPS13B K867I    | HLA-C*03:04 | MT | LV[I]CASGTM   | 40.9   | WT | LV[K]CASGTM   | 1117.07  | 9  | 4.16473  |
| Se123 | VPS13B K867I    | HLA-A*24:02 | MT | KYCSTSLV[I]   | 61.72  | WT | KYCSTSLV[K]   | 11307.32 | 9  | 4.16473  |
| Se123 | PLEC Q1420H     | HLA-B*40:02 | MT | SEAEI[H]AKA   | 144.53 | WT | SEAEI[Q]AKA   | 281.97   | 9  | 36.33702 |
| Se123 | PLEC Q1420H     | HLA-B*40:02 | MT | AEI[H]AKARQA  | 246.33 | WT | AEI[Q]AKARQA  | 190.45   | 10 | 36.33702 |
| Se123 | C10orf128 V109L | HLA-A*24:02 | MT | LFS[L]JIGMLF  | 175.11 | WT | LFS[V]JIGMLF  | 114.82   | 9  | 1.57198  |
| Se123 | LZTS2 R479W     | HLA-C*03:04 | MT | VAL[W]EARATL  | 37.5   | WT | VAL[R]EARATL  | 75.86    | 10 | 13.22399 |
| Se123 | LZTS2 R479W     | HLA-B*40:02 | MT | [W]JEARATLRV  | 85.97  | WT | [R]JEARATLRV  | 72.71    | 9  | 13.22399 |

|       |                |             |    |               |        |    |               |          |    |           |
|-------|----------------|-------------|----|---------------|--------|----|---------------|----------|----|-----------|
| Se123 | B4GALNT4 P714A | HLA-B*40:02 | MT | [A]EAEAVDVT   | 79.16  | WT | [P]EAEAVDVT   | 4184.79  | 10 | 4.82637   |
| Se123 | B4GALNT4 P714A | HLA-B*40:02 | MT | [A]EAEAVDVT   | 167.97 | WT | [P]EAEAVDVT   | 7226.07  | 9  | 4.82637   |
| Se123 | EEF1G D393H    | HLA-A*24:02 | MT | [H]YESYTWRKL  | 433.56 | WT | [D]YESYTWRKL  | 3068.7   | 10 | 606.60246 |
| Se123 | B4GAT1 I197S   | HLA-C*03:04 | MT | VAQPG[S]NYAL  | 32.43  | WT | VAQPG[I]NYAL  | 46.74    | 10 | 7.21073   |
| Se123 | NUMA1 A1289G   | HLA-C*03:04 | MT | RAAERSS[G]L   | 38.17  | WT | RAAERSS[A]L   | 6.77     | 9  | 34.22048  |
| Se123 | PEX5 R105T     | HLA-C*03:04 | MT | [T]APGVADLAL  | 89.11  | WT | [R]APGVADLAL  | 66.21    | 10 | 16.46502  |
| Se123 | PEX5 R105T     | HLA-C*03:04 | MT | Q[T]APGVADL   | 432.8  | WT | Q[R]APGVADL   | 10626.78 | 9  | 16.46502  |
| Se123 | CDKN1B V36L    | HLA-C*03:04 | MT | SACRNLFPGP[L] | 209.56 | WT | SACRNLFPGP[V] | 838.7    | 10 | 24.4406   |
| Se123 | ATF7IP R1041C  | HLA-C*03:04 | MT | TTVNVTH[C]PV  | 404.45 | WT | TTVNVTH[R]PV  | 615.06   | 10 | 12.88456  |
| Se123 | ATF7IP R1041C  | HLA-C*03:04 | MT | TVNVTH[C]PV   | 422.48 | WT | TVNVTH[R]PV   | 796.36   | 9  | 12.88456  |
| Se123 | NUP107 H545Y   | HLA-A*24:02 | MT | G[Y]LLRFMTHL  | 336.85 | WT | G[H]LLRFMTHL  | 16467.21 | 10 | 16.8002   |
| Se123 | NUP107 H545Y   | HLA-C*03:04 | MT | [Y]LLRFMTHL   | 495.63 | WT | [H]LLRFMTHL   | 2328.97  | 9  | 16.8002   |
| Se123 | KIAA1033 T572A | HLA-C*03:04 | MT | LSVGTQMK[A]F  | 405.37 | WT | LSVGTQMK[T]F  | 575.31   | 10 | 10.03088  |
| Se123 | TRPV4 Q683P    | HLA-C*03:04 | MT | WSHWN[P]NLGI  | 284.16 | WT | WSHWN[Q]NLGI  | 485.02   | 10 | 2.9606    |
| Se123 | PYGL S775L     | HLA-C*03:04 | MT | MVLKNIAA[L]   | 14.79  | WT | MVLKNIAA[S]   | 6466.75  | 9  | 24.9836   |
| Se123 | PYGL S775L     | HLA-C*03:04 | MT | TMVLKNIAA[L]  | 331.69 | WT | TMVLKNIAA[S]  | 23256.51 | 10 | 24.9836   |
| Se123 | DACT1 M245L    | HLA-C*03:04 | MT | HAVAVQSP[L]   | 7.03   | WT | HAVAVQSP[M]   | 8.87     | 9  | 3.16073   |
| Se123 | DACT1 M245L    | HLA-C*03:04 | MT | VAVQSP[L]FL   | 33.29  | WT | VAVQSP[M]FL   | 39.31    | 9  | 3.16073   |
| Se123 | DACT1 M245L    | HLA-C*03:04 | MT | HAVAVQSP[L]F  | 66.99  | WT | HAVAVQSP[M]F  | 62.72    | 10 | 3.16073   |
| Se123 | DACT1 M245L    | HLA-C*03:04 | MT | VAVQSP[L]FLL  | 82.07  | WT | VAVQSP[M]FLL  | 54.6     | 10 | 3.16073   |
| Se123 | DACT1 M245L    | HLA-B*15:18 | MT | HAVAVQSP[L]F  | 367.21 | WT | HAVAVQSP[M]F  | 466.2    | 10 | 3.16073   |
| Se123 | CCDC88C N48K   | HLA-A*24:02 | MT | IFL[K]QIMLQI  | 179.89 | WT | IFL[N]QIMLQI  | 151.89   | 10 | 1.80539   |
| Se123 | TMEM121 P218T  | HLA-C*03:04 | MT | MMLY[T]VLSL   | 79.03  | WT | MMLY[P]VLSL   | 58.42    | 9  | 2.77071   |
| Se123 | TMEM121 P218T  | HLA-C*03:04 | MT | Y[T]VLSLATV   | 82.51  | WT | Y[P]VLSLATV   | 62.49    | 9  | 2.77071   |
| Se123 | TMEM121 P218T  | HLA-C*03:04 | MT | KMMLY[T]VLSL  | 294.42 | WT | KMMLY[P]VLSL  | 256.29   | 10 | 2.77071   |
| Se123 | TMEM121 P218T  | HLA-B*40:02 | MT | KMMLY[T]VLSL  | 381.91 | WT | KMMLY[P]VLSL  | 419.04   | 10 | 2.77071   |
| Se123 | TMEM121 P218T  | HLA-B*15:18 | MT | MMLY[T]VLSL   | 382.44 | WT | MMLY[P]VLSL   | 662.05   | 9  | 2.77071   |
| Se123 | ATMIN K153N    | HLA-C*03:04 | MT | FSLV[N]QHFM   | 54.03  | WT | FSLV[K]QHFM   | 188.52   | 9  | 8.24178   |
| Se123 | ATMIN K153N    | HLA-B*40:02 | MT | SQFSLV[N]QHF  | 155.78 | WT | SQFSLV[K]QHF  | 272.28   | 10 | 8.24178   |
| Se123 | ATMIN K153N    | HLA-A*24:02 | MT | QFSLV[N]QHF   | 279.41 | WT | QFSLV[K]QHF   | 592.88   | 9  | 8.24178   |
| Se123 | ATMIN K153N    | HLA-B*15:18 | MT | SQFSLV[N]QHF  | 354.73 | WT | SQFSLV[K]QHF  | 609.67   | 10 | 8.24178   |
| Se123 | DPEP1 E327Q    | HLA-A*24:02 | MT | KYPDLIA[Q]LL  | 23.27  | WT | KYPDLIA[E]LL  | 34.48    | 10 | 2.22939   |
| Se123 | DPEP1 E327Q    | HLA-A*24:02 | MT | KYPDLIA[Q]L   | 55.01  | WT | KYPDLIA[E]L   | 70.63    | 9  | 2.22939   |
| Se123 | DPEP1 E327Q    | HLA-C*03:04 | MT | YPDLIA[Q]LL   | 320.04 | WT | YPDLIA[E]LL   | 784.36   | 9  | 2.22939   |
| Se123 | AOC3 I363M     | HLA-B*40:02 | MT | YE[M]SLQEAL   | 8.87   | WT | YE[I]SLQEAL   | 19.6     | 9  | 1.01586   |
| Se123 | AOC3 I363M     | HLA-B*40:02 | MT | GERLVYE[M]SL  | 32.01  | WT | GERLVYE[I]SL  | 25.98    | 10 | 1.01586   |
| Se123 | AOC3 I363M     | HLA-B*40:02 | MT | YE[M]SLQEALA  | 85.8   | WT | YE[I]SLQEALA  | 247.01   | 10 | 1.01586   |
| Se123 | AOC3 I363M     | HLA-C*03:04 | MT | [M]SLQEALAI   | 111.81 | WT | [I]SLQEALAI   | 378.49   | 9  | 1.01586   |
| Se123 | GPATCH8 E312Q  | HLA-A*24:02 | MT | T[Q]PEYHYI    | 334.29 | WT | T[E]PEYHYI    | 2265.13  | 9  | 6.70502   |
| Se123 | LRFN3 G125V    | HLA-B*40:02 | MT | GE[V]QLRGLV   | 113.78 | WT | GE[G]QLRGLV   | 291.72   | 9  | 4.80889   |
| Se123 | LRFN3 G125V    | HLA-B*40:02 | MT | [V]QLRGLVNL   | 448.58 | WT | [G]QLRGLVNL   | 237.1    | 9  | 4.80889   |
| Se123 | GSS R132C      | HLA-C*03:04 | MT | [C]SADGSPAL   | 74.94  | WT | [R]SADGSPAL   | 41.03    | 9  | 18.42508  |
| Se123 | PIGT L269V     | HLA-B*40:02 | MT | GELST[V]LYNT  | 96.87  | WT | GELST[L]LYNT  | 88.97    | 10 | 45.14225  |
| Se123 | DOPEY2 A1412T  | HLA-C*03:04 | MT | LATAHHGR[T]L  | 31.54  | WT | LATAHHGR[A]L  | 27.62    | 10 | 3.74428   |
| Se123 | DOPEY2 A1412T  | HLA-C*03:04 | MT | ATAHHGR[T]L   | 124.39 | WT | ATAHHGR[A]L   | 99.43    | 9  | 3.74428   |
| Se123 | PACSN2 V9L     | HLA-C*03:04 | MT | MSVYDDSD[V]   | 96.39  | WT | MSVYDDSD[V]   | 546.41   | 9  | 17.4601   |
| Se124 | TP73 H17Q      | HLA-C*03:04 | MT | TTFE[Q]LWSSL  | 148.16 | WT | TTFE[H]LWSSL  | 62.02    | 10 | 2.94398   |
| Se124 | TP73 H17Q      | HLA-C*12:02 | MT | TTFE[Q]LWSSL  | 248.62 | WT | TTFE[H]LWSSL  | 106.95   | 10 | 2.94398   |
| Se124 | FAM69A V45A    | HLA-C*03:04 | MT | Y[A]QYSTYTEL  | 3.9    | WT | Y[V]QYSTYTEL  | 16.41    | 10 | 2.43368   |
| Se124 | FAM69A V45A    | HLA-C*12:02 | MT | Y[A]QYSTYTEL  | 29.15  | WT | Y[V]QYSTYTEL  | 97.2     | 10 | 2.43368   |
| Se124 | FAM69A V45A    | HLA-B*40:02 | MT | [A]QYSTYTEL   | 106.87 | WT | [V]QYSTYTEL   | 255.86   | 9  | 2.43368   |
| Se124 | FAM69A V45A    | HLA-C*12:02 | MT | IY[A]QYSTY    | 423.74 | WT | IY[V]QYSTY    | 878.5    | 9  | 2.43368   |
| Se124 | FAM69A V45A    | HLA-C*12:02 | MT | [A]QYSTYTEL   | 462.55 | WT | [V]QYSTYTEL   | 488.2    | 9  | 2.43368   |
| Se124 | FAM69A V45A    | HLA-C*03:04 | MT | [A]QYSTYTEL   | 484.3  | WT | [V]QYSTYTEL   | 503.47   | 9  | 2.43368   |
| Se124 | PRCC F388Y     | HLA-B*40:02 | MT | QEIAPDAS[Y]I  | 255.5  | WT | QEIAPDAS[F]I  | 204.74   | 10 | 31.52341  |
| Se124 | KIF14 I609V    | HLA-B*40:02 | MT | QEANA[I]SSKL  | 132.16 | WT | QEANA[I]SSKL  | 110.65   | 10 | 1.21003   |
| Se124 | WDR26 P589T    | HLA-A*24:02 | MT | IWHKRSEL[T]I  | 167.21 | WT | IWHKRSEL[P]I  | 319.94   | 10 | 21.25601  |
| Se124 | WDR26 P589T    | HLA-B*40:02 | MT | SEL[T]IAELT   | 367.01 | WT | SEL[P]IAELT   | 375.39   | 9  | 21.25601  |
| Se124 | HEATR1 E741Q   | HLA-B*40:02 | MT | L[Q]SVITAVEI  | 402.1  | WT | L[E]SVITAVEI  | 52.12    | 10 | 5.20859   |
| Se124 | CAP2 M405I     | HLA-B*40:02 | MT | IQV[I]GRVPTI  | 232.8  | WT | IQV[M]GRVPTI  | 206.01   | 10 | 7.01346   |
| Se124 | TIAM2 S604R    | HLA-B*40:02 | MT | LEREF[R]VQSL  | 62.34  | WT | LEREF[S]VQSL  | 35.6     | 10 | 1.81073   |
| Se124 | TIAM2 S604R    | HLA-B*40:02 | MT | REF[R]VQSLT   | 76.59  | WT | REF[S]VQSLT   | 67.37    | 9  | 1.81073   |
| Se124 | TIAM2 S604R    | HLA-B*40:02 | MT | REF[R]VQSLTS  | 108.22 | WT | REF[S]VQSLTS  | 89.87    | 10 | 1.81073   |
| Se124 | TIAM2 S604R    | HLA-C*12:02 | MT | F[R]VQSLTSV   | 420.74 | WT | F[S]VQSLTSV   | 23.33    | 9  | 1.81073   |
| Se124 | RSBN1L S21L    | HLA-C*03:04 | MT | AAAAPTATV[L]  | 7.97   | WT | AAAAPTATV[S]  | 6414.76  | 10 | 16.22781  |
| Se124 | RSBN1L S21L    | HLA-C*03:04 | MT | AAAPTATV[L]   | 8.45   | WT | AAAPTATV[S]   | 7548.53  | 9  | 16.22781  |
| Se124 | RSBN1L S21L    | HLA-C*12:02 | MT | AAAAPTATV[L]  | 49.11  | WT | AAAAPTATV[S]  | 3548.02  | 10 | 16.22781  |
| Se124 | RSBN1L S21L    | HLA-C*12:02 | MT | AAAPTATV[L]   | 54.7   | WT | AAAPTATV[S]   | 4804.65  | 9  | 16.22781  |
| Se124 | RSBN1L S21L    | HLA-B*40:02 | MT | [L]EKEPFGKL   | 252.55 | WT | [S]EKEPFGKL   | 149.91   | 9  | 16.22781  |
| Se124 | PREX2 D1142E   | HLA-B*40:02 | MT | [E]JELPLSVRI  | 238.2  | WT | [D]JELPLSVRI  | 703.5    | 9  | 1.01258   |
| Se124 | PREX2 D1142E   | HLA-B*40:02 | MT | G[E]JELPLSVRI | 307.13 | WT | G[D]JELPLSVRI | 5379.53  | 10 | 1.01258   |
| Se124 | PREX2 D1142E   | HLA-B*40:02 | MT | DEMDSG[E]JEL  | 368.13 | WT | DEMDSG[D]JEL  | 588.51   | 9  | 1.01258   |
| Se124 | VSTM4 S143Y    | HLA-C*12:02 | MT | W[Y]NGSSATEM  | 427.51 | WT | W[S]NGSSATEM  | 103.61   | 10 | 1.26922   |
| Se124 | VSTM4 S143Y    | HLA-C*03:04 | MT | TAW[Y]NGSSA   | 482.28 | WT | TAW[S]NGSSA   | 428.92   | 9  | 1.26922   |
| Se124 | MGEA5 S19Y     | HLA-B*40:02 | MT | SELS[Y]NPAA   | 38.93  | WT | SELS[S]NPAA   | 83.11    | 9  | 29.06956  |
| Se124 | MGEA5 S19Y     | HLA-B*40:02 | MT | RESELS[Y]NPA  | 40.12  | WT | RESELS[S]NPA  | 82.52    | 10 | 29.06956  |
| Se124 | MGEA5 S19Y     | HLA-C*12:02 | MT | LS[Y]NPAASA   | 346.55 | WT | LS[S]NPAASA   | 1240.48  | 9  | 29.06956  |
| Se124 | MGEA5 S19Y     | HLA-B*40:02 | MT | RESELS[Y]NPN  | 428.4  | WT | RESELS[S]NPN  | 1458.25  | 9  | 29.06956  |

|       |                |             |    |               |        |    |               |          |    |          |
|-------|----------------|-------------|----|---------------|--------|----|---------------|----------|----|----------|
| Se124 | UROS A191T     | HLA-C*03:04 | MT | YSQQGVP[T]SI  | 46.73  | WT | YSQQGVP[A]SI  | 45.05    | 10 | 29.20649 |
| Se124 | UROS A191T     | HLA-C*12:02 | MT | YSQQGVP[T]SI  | 210.47 | WT | YSQQGVP[A]SI  | 215.61   | 10 | 29.20649 |
| Se124 | ANKRD52 D869H  | HLA-C*03:04 | MT | FA[H]NVSGLRM  | 6.29   | WT | FA[D]NVSGLRM  | 17.84    | 10 | 5.81125  |
| Se124 | ANKRD52 D869H  | HLA-C*12:02 | MT | FA[H]NVSGLRM  | 8.34   | WT | FA[D]NVSGLRM  | 32.5     | 10 | 5.81125  |
| Se124 | ANKRD52 D869H  | HLA-C*03:04 | MT | AAFA[H]NVSGL  | 15.45  | WT | AAFA[D]NVSGL  | 24.54    | 10 | 5.81125  |
| Se124 | ANKRD52 D869H  | HLA-C*12:02 | MT | AAFA[H]NVSGL  | 84.73  | WT | AAFA[D]NVSGL  | 181.61   | 10 | 5.81125  |
| Se124 | ANKRD52 D869H  | HLA-C*03:04 | MT | HAAFA[H]NV    | 193.14 | WT | HAAFA[D]NV    | 387.4    | 9  | 5.81125  |
| Se124 | ANKRD52 D869H  | HLA-C*12:02 | MT | HAAFA[H]NV    | 213.73 | WT | HAAFA[D]NV    | 365.35   | 9  | 5.81125  |
| Se124 | TP53 C145F     | HLA-C*12:02 | MT | NSFEVRVCA[F]  | 261.52 | WT | NSFEVRVCA[C]  | 9212.85  | 10 | 26.80988 |
| Se124 | TP53 C145F     | HLA-C*03:04 | MT | NSFEVRVCA[F]  | 385.68 | WT | NSFEVRVCA[C]  | 18468.92 | 10 | 26.80988 |
| Se124 | TP53 C145F     | HLA-B*40:02 | MT | FEVRVCA[F]PG  | 406.68 | WT | FEVRVCA[C]PG  | 647.4    | 10 | 26.80988 |
| Se124 | SMCR8 A237V    | HLA-B*40:02 | MT | IEKANEL[V]SV  | 117.28 | WT | IEKANEL[A]SV  | 183.39   | 10 | 2.56077  |
| Se124 | SMCR8 A237V    | HLA-B*40:02 | MT | NEL[V]SVEKSI  | 190.21 | WT | NEL[A]SVEKSI  | 140.78   | 10 | 2.56077  |
| Se124 | ITGB4 G1383D   | HLA-C*03:04 | MT | FAFP[D]STNSL  | 2.06   | WT | FAFP[G]STNSL  | 1.77     | 10 | 26.21579 |
| Se124 | ITGB4 G1383D   | HLA-C*12:02 | MT | FAFP[D]STNSL  | 5.14   | WT | FAFP[G]STNSL  | 4.1      | 10 | 26.21579 |
| Se124 | GAREM1 R376G   | HLA-C*03:04 | MT | YA[G]DELTOQSF | 39.11  | WT | YA[R]DELTOQSF | 20.3     | 10 | 2.29032  |
| Se124 | GAREM1 R376G   | HLA-C*12:02 | MT | YA[G]DELTOQSF | 123.41 | WT | YA[R]DELTOQSF | 25.18    | 10 | 2.29032  |
| Se124 | TPGS1 V122M    | HLA-C*03:04 | MT | AAFNNV[S]M    | 6.79   | WT | AAFNNV[S]V    | 22.99    | 9  | 4.11472  |
| Se124 | TPGS1 V122M    | HLA-C*03:04 | MT | RAAFNNV[S]M   | 12.86  | WT | RAAFNNV[S]V   | 60.23    | 10 | 4.11472  |
| Se124 | TPGS1 V122M    | HLA-C*12:02 | MT | AAFNNV[S]M    | 36.95  | WT | AAFNNV[S]V    | 54.42    | 9  | 4.11472  |
| Se124 | TPGS1 V122M    | HLA-C*12:02 | MT | RAAFNNV[S]M   | 110.8  | WT | RAAFNNV[S]V   | 169.86   | 10 | 4.11472  |
| Se124 | TPGS1 V122M    | HLA-C*12:02 | MT | FNNV[S]M      | 150.2  | WT | FNNV[S]V      | 166.02   | 9  | 4.11472  |
| Se124 | TPGS1 V122M    | HLA-C*03:04 | MT | AAFNNV[S]M    | 386.43 | WT | AAFNNV[S]V    | 188.59   | 10 | 4.11472  |
| Se124 | TPGS1 V122M    | HLA-C*12:02 | MT | AAFNNV[S]M    | 390.02 | WT | AAFNNV[S]V    | 300.86   | 10 | 4.11472  |
| Se125 | ASAP3 A668S    | HLA-A*02:01 | MT | [S]QAGTFAPFL  | 29.77  | WT | [A]QAGTFAPFL  | 31.29    | 10 | 9.52871  |
| Se125 | ASAP3 A668S    | HLA-B*15:01 | MT | EQ[S]QAGTFAF  | 84.7   | WT | EQ[A]QAGTFAF  | 53.47    | 10 | 9.52871  |
| Se125 | ASAP3 A668S    | HLA-B*15:01 | MT | [S]QAGTFAPFL  | 100.43 | WT | [A]QAGTFAPFL  | 95.25    | 10 | 9.52871  |
| Se125 | ASAP3 A668S    | HLA-B*15:01 | MT | [Q]S]QAGTFAF  | 200.62 | WT | [Q]A]QAGTFAF  | 250.97   | 9  | 9.52871  |
| Se125 | ASAP3 A668S    | HLA-B*15:01 | MT | LLEQ[S]QAGTF  | 305.17 | WT | LLEQ[A]QAGTF  | 294.08   | 10 | 9.52871  |
| Se125 | BCAS2 R72T     | HLA-B*15:01 | MT | IMRNEFE[T]JL  | 152.94 | WT | IMRNEFE[R]JL  | 514.28   | 9  | 18.95261 |
| Se125 | BCAS2 R72T     | HLA-A*02:01 | MT | [T]JLAARQPIEL | 165.66 | WT | [R]JLAARQPIEL | 87.58    | 10 | 18.95261 |
| Se125 | CRIM1 C284Y    | HLA-A*02:01 | MT | RLTADG[Y]CTL  | 217.09 | WT | RLTADG[C]CTL  | 443.26   | 10 | 24.13733 |
| Se125 | CRIM1 C284Y    | HLA-B*15:01 | MT | TQVRLTADG[Y]  | 221.25 | WT | TQVRLTADG[C]  | 24272.74 | 10 | 24.13733 |
| Se125 | STEAP3 R126H   | HLA-B*15:01 | MT | LQH[H]ESNAEY  | 19.25  | WT | LQH[R]ESNAEY  | 22.54    | 10 | 9.34006  |
| Se125 | GOLGA4 E1853Q  | HLA-A*11:01 | MT | LTCQL[Q]QK    | 256.89 | WT | LTCQL[E]QK    | 250.56   | 9  | 19.38011 |
| Se125 | XYLB G235S     | HLA-A*02:01 | MT | CL[S]ACAPHL   | 82.05  | WT | CL[G]ACAPHL   | 178.02   | 9  | 2.76902  |
| Se125 | XYLB G235S     | HLA-A*11:01 | MT | [S]ACAPHLEEK  | 88.1   | WT | [G]ACAPHLEEK  | 218.79   | 10 | 2.76902  |
| Se125 | XYLB G235S     | HLA-A*02:01 | MT | KVWSQACL[S]A  | 477.03 | WT | KVWSQACL[G]A  | 584.81   | 10 | 2.76902  |
| Se125 | FLNB A1218S    | HLA-A*11:01 | MT | LVPHPF[S]RVK  | 384.08 | WT | LVPHPF[A]RVK  | 375.75   | 10 | 36.00511 |
| Se125 | XRN1 L662M     | HLA-A*02:01 | MT | ALYFCGFPT[M]  | 67.63  | WT | ALYFCGFPT[L]  | 16.58    | 10 | 4.84497  |
| Se125 | XRN1 L662M     | HLA-B*15:01 | MT | ALYFCGFPT[M]  | 98.78  | WT | ALYFCGFPT[L]  | 511.02   | 10 | 4.84497  |
| Se125 | XRN1 L662M     | HLA-A*11:01 | MT | LYFCGFPT[M]K  | 247.32 | WT | LYFCGFPT[L]K  | 154.18   | 10 | 4.84497  |
| Se125 | RAP1GDS1 E269Q | HLA-A*11:01 | MT | MVDNGIV[Q]K   | 36.56  | WT | MVDNGIV[E]K   | 43.28    | 9  | 3.60222  |
| Se125 | RAP1GDS1 E269Q | HLA-A*11:01 | MT | HMVDNGIV[Q]K  | 94.04  | WT | HMVDNGIV[E]K  | 97.64    | 10 | 3.60222  |
| Se125 | DCDC2 R7M      | HLA-A*02:01 | MT | A[M]SSHLSQPV  | 5.72   | WT | A[R]SSHLSQPV  | 18667.71 | 10 | 11.07008 |
| Se125 | DCDC2 R7M      | HLA-B*15:01 | MT | A[M]SSHLSQPV  | 255.75 | WT | A[R]SSHLSQPV  | 20061.26 | 10 | 11.07008 |
| Se125 | FZD3 D640G     | HLA-B*15:01 | MT | SIR[G]LSNNPM  | 205.68 | WT | SIR[D]LSNNPM  | 225.98   | 10 | 11.28127 |
| Se125 | GRHL2 K118N    | HLA-A*02:01 | MT | VL[K]TVPVNL   | 138.89 | WT | VL[K]TVPVNL   | 992.6    | 9  | 11.16801 |
| Se125 | GRHL2 K118N    | HLA-A*02:01 | MT | VQVL[N]TVPV   | 163.21 | WT | VQVL[K]TVPV   | 279.61   | 9  | 11.16801 |
| Se125 | CNTLN K1289R   | HLA-A*11:01 | MT | TFVKALA[R]    | 42.79  | WT | TFVKALA[K]    | 9.73     | 9  | 1.5818   |
| Se125 | CNTLN K1289R   | HLA-A*02:01 | MT | ALA[R]JELQNDV | 82.15  | WT | ALA[K]JELQNDV | 63.04    | 10 | 1.5818   |
| Se125 | RABL6 P170A    | HLA-B*15:01 | MT | HV[A]JVCVLGNY | 148.92 | WT | HV[P]JVCVLGNY | 1143.51  | 10 | 13.63527 |
| Se125 | RABL6 P170A    | HLA-B*15:01 | MT | V[A]JVCVLGNY  | 268.96 | WT | V[P]JVCVLGNY  | 7809.99  | 9  | 13.63527 |
| Se125 | RABL6 P170A    | HLA-A*11:01 | MT | HV[A]JVCVLGNY | 404.98 | WT | HV[P]JVCVLGNY | 5199.07  | 10 | 13.63527 |
| Se125 | RABL6 P170A    | HLA-A*11:01 | MT | [A]JVCVLGNYR  | 448.04 | WT | [P]JVCVLGNYR  | 9721.2   | 9  | 13.63527 |
| Se125 | DEAF1 L129M    | HLA-A*11:01 | MT | SISGHV[M]SGR  | 130.9  | WT | SISGHV[L]SGR  | 162.38   | 10 | 5.44144  |
| Se125 | DEAF1 L129M    | HLA-A*02:01 | MT | V[M]SGRTALQI  | 335.75 | WT | V[L]SGRTALQI  | 400.14   | 10 | 5.44144  |
| Se125 | OTUB1 ESV      | HLA-A*11:01 | MT | MAAE[V]PQQQK  | 200.42 | WT | MAAE[E]PQQQK  | 730.83   | 10 | 40.74361 |
| Se125 | CLEC7A Q152K   | HLA-A*02:01 | MT | VIYD[K]LCSV   | 7.33   | WT | VIYD[Q]LCSV   | 8.52     | 9  | 2.41534  |
| Se125 | CLEC7A Q152K   | HLA-A*02:01 | MT | [K]LCSVPSYSI  | 51.14  | WT | [Q]LCSVPSYSI  | 318.42   | 10 | 2.41534  |
| Se125 | CLEC7A Q152K   | HLA-A*11:01 | MT | WIHVSVIYD[K]  | 135.76 | WT | WIHVSVIYD[Q]  | 28047.08 | 10 | 2.41534  |
| Se125 | CLEC7A Q152K   | HLA-A*02:01 | MT | SVIYD[K]LCSV  | 200.72 | WT | SVIYD[Q]LCSV  | 110.26   | 10 | 2.41534  |
| Se125 | GALC G355V     | HLA-A*02:01 | MT | ALTDGL[V]NL   | 14.11  | WT | ALTDGL[G]NL   | 118.51   | 9  | 7.2254   |
| Se125 | GALC G355V     | HLA-A*02:01 | MT | GL[V]NLIII    | 193.21 | WT | GL[G]NLIII    | 342.08   | 9  | 7.2254   |
| Se125 | GALC G355V     | HLA-A*02:01 | MT | ALTDGL[V]NLT  | 344.61 | WT | ALTDGL[G]NLT  | 2122.82  | 10 | 7.2254   |
| Se125 | HERC1 A4494V   | HLA-A*11:01 | MT | FVQI[V]RQVVK  | 422.94 | WT | FVQI[A]RQVVK  | 583.87   | 10 | 6.62619  |
| Se125 | HERC1 A4494V   | HLA-A*11:01 | MT | VQI[V]RQVVK   | 458.77 | WT | VQI[A]RQVVK   | 228.95   | 9  | 6.62619  |
| Se125 | CHTF18 V577M   | HLA-A*11:01 | MT | VQATR[M]GLK   | 91.55  | WT | VQATR[V]GLK   | 138.51   | 9  | 6.38584  |
| Se125 | MTSSL R84C     | HLA-A*11:01 | MT | CM[C]HRSIETK  | 93.5   | WT | CM[R]HRSIETK  | 394.41   | 10 | 6.02611  |
| Se125 | MYH10 S1922T   | HLA-A*11:01 | MT | GLSREV[T]TLK  | 82.68  | WT | GLSREV[S]TLK  | 91.88    | 10 | 16.099   |
| Se125 | MYH10 S1922T   | HLA-A*11:01 | MT | LSREV[T]TLK   | 140.05 | WT | LSREV[S]TLK   | 156.58   | 9  | 16.099   |
| Se125 | MYH10 S1922T   | HLA-A*11:01 | MT | [T]TLKNRLRR   | 255.19 | WT | [S]TLKNRLRR   | 174.55   | 9  | 16.099   |
| Se125 | MYH10 S1922T   | HLA-A*02:01 | MT | GLSREV[M]TL   | 350.87 | WT | GLSREV[S]TL   | 512.42   | 9  | 16.099   |
| Se125 | MED25 G298W    | HLA-A*02:01 | MT | [W]LGPRFSPI   | 92.63  | WT | [G]LGPRFSPI   | 221.14   | 9  | 21.82273 |
| Se125 | MED25 G298W    | HLA-B*15:01 | MT | NQKA[W]LGPRF  | 117    | WT | NQKA[G]LGPRF  | 114.93   | 10 | 21.82273 |
| Se125 | ZFP64 F317L    | HLA-A*11:01 | MT | RIHCTDRP[L]K  | 171.45 | WT | RIHCTDRP[F]K  | 105.74   | 10 | 8.08677  |
| Se125 | SGSM3 L254V    | HLA-A*11:01 | MT | LTLGM[V]HLK   | 13.98  | WT | LTLGM[L]HLK   | 17.02    | 9  | 15.57634 |
| Se125 | SGSM3 L254V    | HLA-A*02:01 | MT | VLFQLTLGM[V]  | 36.05  | WT | VLFQLTLGM[L]  | 121.17   | 10 | 15.57634 |

|       |                 |             |    |              |        |    |              |          |    |          |
|-------|-----------------|-------------|----|--------------|--------|----|--------------|----------|----|----------|
| Se125 | SGSM3 L254V     | HLA-A*02:01 | MT | FQLTLGM[V]HL | 79.89  | WT | FQLTLGM[L]HL | 96.79    | 10 | 15.57634 |
| Se125 | SGSM3 L254V     | HLA-A*11:01 | MT | QLTLGM[V]HLK | 179.67 | WT | QLTLGM[L]HLK | 168.86   | 10 | 15.57634 |
| Se125 | DOCK11 H1078Q   | HLA-B*15:01 | MT | E[Q]YIPLNLP  | 258.77 | WT | E[H]YIPLNLP  | 16034.43 | 10 | 1.0611   |
| Se125 | DOCK11 H1078Q   | HLA-B*15:01 | MT | LQTCNHE[Q]Y  | 288.27 | WT | LQTCNHE[H]Y  | 156.81   | 10 | 1.0611   |
| Se126 | EHBP1 N218K     | HLA-A*31:01 | MT | KL[K]FLDEAEK | 379.53 | WT | KL[N]FLDEAEK | 615.67   | 10 | 8.69674  |
| Se126 | ERBB4 C520W     | HLA-A*31:01 | MT | [W]LSCRRFSR  | 20.93  | WT | [C]LSCRRFSR  | 15.52    | 9  | 2.33208  |
| Se126 | ERBB4 C520W     | HLA-A*31:01 | MT | Q[W]LSCRRFSR | 39.09  | WT | Q[C]LSCRRFSR | 127.55   | 10 | 2.33208  |
| Se126 | FAM149A K201E   | HLA-A*26:03 | MT | [E]VAGNRFPV  | 120.24 | WT | [K]VAGNRFPV  | 8567.52  | 10 | 1.38018  |
| Se126 | FAM149A K201E   | HLA-A*26:03 | MT | [E]VAGNRFPH  | 219.98 | WT | [K]VAGNRFPH  | 17775.19 | 9  | 1.38018  |
| Se126 | SCRIB G1424R    | HLA-A*31:01 | MT | RLALDGETL[R] | 146.09 | WT | RLALDGETL[G] | 32460.88 | 10 | 26.43186 |
| Se126 | MAP1LC3B2 E14V  | HLA-A*31:01 | MT | KQRRTF[V]QR  | 8.77   | WT | KQRRTF[E]QR  | 15.1     | 9  | 1.26496  |
| Se126 | MAP1LC3B2 E14V  | HLA-A*31:01 | MT | KTFKQRRTF[V] | 392.69 | WT | KTFKQRRTF[E] | 2210.56  | 10 | 1.26496  |
| Se126 | ZC3H14 A384T    | HLA-A*31:01 | MT | KQTLVP[T]PR  | 27.06  | WT | KQTLVP[A]PR  | 24.18    | 9  | 10.23447 |
| Se126 | ZC3H14 A384T    | HLA-A*31:01 | MT | QTLVP[T]PRTR | 105.07 | WT | QTLVP[A]PRTR | 135.25   | 10 | 10.23447 |
| Se126 | RPAP1 R1289W    | HLA-C*14:02 | MT | YF[W]TLVTGAL | 30.08  | WT | YF[R]TLVTGAL | 24.57    | 10 | 6.34228  |
| Se126 | RPAP1 R1289W    | HLA-C*14:02 | MT | F[W]TLVTGAL  | 67.02  | WT | F[R]TLVTGAL  | 147.69   | 9  | 6.34228  |
| Se126 | RPAP1 R1289W    | HLA-A*31:01 | MT | [W]TLVTGALR  | 82.09  | WT | [R]TLVTGALR  | 10.85    | 9  | 6.34228  |
| Se126 | RPAP1 R1289W    | HLA-A*31:01 | MT | F[W]TLVTGALR | 429.73 | WT | F[R]TLVTGALR | 9600.85  | 10 | 6.34228  |
| Se126 | ITGB4 E853D     | HLA-A*26:03 | MT | [D]VYRQISGV  | 177.01 | WT | [E]VYRQISGV  | 61.68    | 9  | 36.17381 |
| Se126 | SPEF1 G123S     | HLA-C*14:02 | MT | RRKQGA[S]SL  | 381.14 | WT | RRKQGA[G]SL  | 877.36   | 9  | 2.43031  |
| Se127 | LEPR D475A      | HLA-C*08:01 | MT | S[A]IPSHP    | 366.09 | WT | S[D]IPSHP    | 17629.24 | 9  | 3.63948  |
| Se127 | LEPR N1126Y     | HLA-A*26:01 | MT | DSCSHFVE[Y]  | 493.72 | WT | DSCSHFVE[N]  | 38110.08 | 9  | 3.63948  |
| Se127 | PIK3C2B V923I   | HLA-A*02:07 | MT | YLPQL[V]QAL  | 297.95 | WT | YLPQL[V]QAL  | 553.28   | 9  | 6.37336  |
| Se127 | PIK3C2B V923I   | HLA-C*08:01 | MT | YLPQL[I]QAL  | 375.53 | WT | YLPQL[V]QAL  | 357.78   | 9  | 6.37336  |
| Se127 | SEC61A1 I129V   | HLA-A*26:01 | MT | S[V]VYVMTGM  | 20.73  | WT | S[I]VYVMTGM  | 61.88    | 9  | 107.1571 |
| Se127 | SEC61A1 I129V   | HLA-A*26:01 | MT | S[V]VYVMTGMY | 22.5   | WT | S[I]VYVMTGMY | 68.88    | 10 | 107.1571 |
| Se127 | SEC61A1 I129V   | HLA-A*26:01 | MT | ITIGQS[V]VY  | 331.63 | WT | ITIGQS[I]VY  | 299.32   | 9  | 107.1571 |
| Se127 | UHRF1BP1 D474Y  | HLA-A*26:01 | MT | MVVRVDDL[Y]  | 214.5  | WT | MVVRVDDL[D]  | 36359.52 | 9  | 4.84939  |
| Se127 | FBXO10 V29L     | HLA-A*02:07 | MT | SL[L]CRAWYEL | 443.62 | WT | SL[L]CRAWYEL | 1828.96  | 10 | 2.52945  |
| Se127 | SYT7 N135Y      | HLA-A*26:01 | MT | EAHEGCSRE[Y] | 150.88 | WT | EAHEGCSRE[N] | 35761.81 | 10 | 4.64836  |
| Se127 | SYT7 N135Y      | HLA-A*02:07 | MT | [Y]LGRIQFSV  | 176.58 | WT | [N]LGRIQFSV  | 3113.19  | 9  | 4.64836  |
| Se127 | USP5 S39C       | HLA-A*26:01 | MT | DTPE[C]EGGLY | 42.69  | WT | DTPE[S]EGGLY | 40.08    | 10 | 29.45218 |
| Se127 | ZFYVE26 D1470N  | HLA-C*08:01 | MT | YLFVVK[N]ASL | 291.35 | WT | YLFVVK[D]ASL | 328.12   | 10 | 3.4332   |
| Se127 | ZFYVE26 D1470N  | HLA-A*02:07 | MT | YLFVVK[N]ASL | 367.92 | WT | YLFVVK[D]ASL | 536.6    | 10 | 3.4332   |
| Se127 | CTCFL I398T     | HLA-C*08:01 | MT | YHDANF[T]PTV | 352.8  | WT | YHDANF[I]PTV | 373.94   | 10 | 1.01218  |
| Se128 | AGRN G741E      | HLA-C*03:02 | MT | KARCESQR[E]L | 492.7  | WT | KARCESQR[G]L | 1198.23  | 10 | 78.05516 |
| Se128 | ZBTB40 V972M    | HLA-B*15:01 | MT | HIHE[M]HSKEY | 181.97 | WT | HIHE[V]HSKEY | 232.76   | 10 | 3.7491   |
| Se128 | ZBTB40 V972M    | HLA-C*03:02 | MT | HIHE[M]HSKEY | 310.72 | WT | HIHE[V]HSKEY | 307.66   | 10 | 3.7491   |
| Se128 | PDE4B E263K     | HLA-C*03:02 | MT | FTDL[K]JLAAI | 141.44 | WT | FTDL[E]JLAAI | 120.02   | 10 | 1.86005  |
| Se128 | PDE4B E263K     | HLA-C*03:03 | MT | FTDL[K]JLAAI | 342.31 | WT | FTDL[E]JLAAI | 416.25   | 10 | 1.86005  |
| Se128 | PDE4B E263K     | HLA-C*03:02 | MT | FTDL[K]JLAA  | 396.08 | WT | FTDL[E]JLAA  | 451.66   | 9  | 1.86005  |
| Se128 | POLQ D549N      | HLA-B*15:01 | MT | [N]MHTYAACF  | 50.74  | WT | [D]MHTYAACF  | 477.9    | 10 | 1.21291  |
| Se128 | POLQ D549N      | HLA-C*03:02 | MT | STSQ[N]MHTY  | 54.18  | WT | STSQ[D]MHTY  | 128.97   | 9  | 1.21291  |
| Se128 | POLQ D549N      | HLA-C*03:02 | MT | [N]MHTYAACF  | 201.08 | WT | [D]MHTYAACF  | 1183.67  | 10 | 1.21291  |
| Se128 | POLQ D549N      | HLA-B*15:01 | MT | STSQ[N]MHTY  | 230.93 | WT | STSQ[D]MHTY  | 320.84   | 9  | 1.21291  |
| Se128 | POLQ D549N      | HLA-A*26:03 | MT | STSQ[N]MHTY  | 288.59 | WT | STSQ[D]MHTY  | 350.55   | 9  | 1.21291  |
| Se128 | POLQ D549N      | HLA-C*03:02 | MT | ASTSQ[N]MHTY | 325.83 | WT | ASTSQ[D]MHTY | 484.97   | 10 | 1.21291  |
| Se128 | POLQ D549N      | HLA-B*58:01 | MT | ASTSQ[N]MHTY | 405.34 | WT | ASTSQ[D]MHTY | 451.82   | 10 | 1.21291  |
| Se128 | POLQ D549N      | HLA-B*15:01 | MT | ASTSQ[N]MHTY | 433.91 | WT | ASTSQ[D]MHTY | 596.47   | 10 | 1.21291  |
| Se128 | POLQ D549N      | HLA-C*03:02 | MT | GVASTSQ[N]M  | 446.57 | WT | GVASTSQ[D]M  | 538.35   | 9  | 1.21291  |
| Se128 | POLQ D549N      | HLA-B*58:01 | MT | STSQ[N]MHTY  | 471.48 | WT | STSQ[D]MHTY  | 495.46   | 9  | 1.21291  |
| Se128 | AHR Y468C       | HLA-B*15:01 | MT | MQQDESI[C]LY | 34.28  | WT | MQQDESI[Y]LY | 46.59    | 10 | 15.23351 |
| Se128 | AHR Y468C       | HLA-C*03:02 | MT | MMQQDESI[C]L | 497.37 | WT | MMQQDESI[Y]L | 261.29   | 10 | 15.23351 |
| Se128 | TRRAP W3205S    | HLA-C*03:02 | MT | WLA[S]IPQLL  | 161.4  | WT | WLA[W]IPQLL  | 250.15   | 9  | 8.72597  |
| Se128 | TRRAP W3205S    | HLA-C*03:02 | MT | A[S]IPQLLTCL | 198.9  | WT | A[W]IPQLLTCL | 6183.24  | 10 | 8.72597  |
| Se128 | TRRAP W3205S    | HLA-C*03:03 | MT | WLA[S]IPQLL  | 204.57 | WT | WLA[W]IPQLL  | 259.34   | 9  | 8.72597  |
| Se128 | TRRAP W3205S    | HLA-C*03:03 | MT | A[S]IPQLLTCL | 479.02 | WT | A[W]IPQLLTCL | 16879.34 | 10 | 8.72597  |
| Se128 | KIAA1549 Q1487H | HLA-C*03:02 | MT | VPSKI[H]LIAM | 377.29 | WT | VPSKI[Q]LIAM | 666.83   | 10 | 1.7726   |
| Se128 | KRAS G12R       | HLA-A*33:03 | MT | EYKLVVGA[R]  | 32.04  | WT | EYKLVVGA[G]  | 23811.84 | 10 | 9.97401  |
| Se128 | BRI3BP H151Y    | HLA-C*03:02 | MT | FTFSVL[Y]VVF | 8.02   | WT | FTFSVL[H]VVF | 5.24     | 10 | 7.66115  |
| Se128 | BRI3BP H151Y    | HLA-A*33:03 | MT | SVL[Y]VVFGR  | 11.54  | WT | SVL[H]VVFGR  | 13.92    | 9  | 7.66115  |
| Se128 | BRI3BP H151Y    | HLA-B*15:01 | MT | FTFSVL[Y]VVF | 44.2   | WT | FTFSVL[H]VVF | 33.46    | 10 | 7.66115  |
| Se128 | BRI3BP H151Y    | HLA-C*03:02 | MT | FTFSVL[Y]VV  | 49.35  | WT | FTFSVL[H]VV  | 30.05    | 9  | 7.66115  |
| Se128 | BRI3BP H151Y    | HLA-A*33:03 | MT | FSVL[Y]VVFGR | 50.48  | WT | FSVL[H]VVFGR | 36.42    | 10 | 7.66115  |
| Se128 | BRI3BP H151Y    | HLA-B*58:01 | MT | FTFSVL[Y]VVF | 53.92  | WT | FTFSVL[H]VVF | 39.71    | 10 | 7.66115  |
| Se128 | BRI3BP H151Y    | HLA-B*58:01 | MT | [Y]VVFGRFFW  | 54.57  | WT | [H]VVFGRFFW  | 44.99    | 9  | 7.66115  |
| Se128 | BRI3BP H151Y    | HLA-C*03:03 | MT | FTFSVL[Y]VVF | 79.69  | WT | FTFSVL[H]VVF | 37.09    | 10 | 7.66115  |
| Se128 | BRI3BP H151Y    | HLA-B*15:01 | MT | TLGFTFSVL[H] | 247.93 | WT | TLGFTFSVL[H] | 6130.38  | 10 | 7.66115  |
| Se128 | BRI3BP H151Y    | HLA-B*15:01 | MT | VL[Y]VVFGRF  | 258.45 | WT | VL[H]VVFGRF  | 260.42   | 9  | 7.66115  |
| Se128 | BRI3BP H151Y    | HLA-C*03:03 | MT | FTFSVL[Y]VV  | 299.06 | WT | FTFSVL[H]VV  | 120.09   | 9  | 7.66115  |
| Se128 | BRI3BP H151Y    | HLA-C*03:02 | MT | [Y]VVFGRFFWI | 342.24 | WT | [H]VVFGRFFWI | 2270.47  | 10 | 7.66115  |
| Se128 | BRI3BP H151Y    | HLA-B*15:01 | MT | VL[Y]VVFGRFF | 369.23 | WT | VL[H]VVFGRFF | 360.83   | 10 | 7.66115  |
| Se128 | PIK3R5 D76N     | HLA-C*03:02 | MT | Y[N]LLTPLAL  | 59.92  | WT | Y[D]LLTPLAL  | 1313.07  | 9  | 3.14964  |
| Se128 | PIK3R5 D76N     | HLA-C*03:02 | MT | GTY[N]LLTPL  | 88.14  | WT | GTY[D]LLTPL  | 57.98    | 9  | 3.14964  |
| Se128 | PIK3R5 D76N     | HLA-C*03:03 | MT | Y[N]LLTPLAL  | 93.53  | WT | Y[D]LLTPLAL  | 2275.27  | 9  | 3.14964  |
| Se128 | PIK3R5 D76N     | HLA-C*03:03 | MT | GTY[N]LLTPL  | 284.9  | WT | GTY[D]LLTPL  | 162.69   | 9  | 3.14964  |
| Se128 | PIK3R5 D76N     | HLA-C*03:02 | MT | Y[N]LLTPLALL | 474.35 | WT | Y[D]LLTPLALL | 6271.54  | 10 | 3.14964  |
| Se128 | RIPK4 G615V     | HLA-A*33:03 | MT | HLLAQR[V]HYR | 10.23  | WT | HLLAQR[G]HYR | 19.07    | 10 | 4.0364   |



|       |                 |             |    |              |        |    |               |          |    |           |
|-------|-----------------|-------------|----|--------------|--------|----|---------------|----------|----|-----------|
| Se128 | RIPK4 G615V     | HLA-A*33:03 | MT | LAAQR[V]HYR  | 24.27  | WT | LAAQR[G]HYR   | 52.33    | 9  | 4.0364    |
| Se128 | RIPK4 G615V     | HLA-B*15:01 | MT | HAAQR[V]HY   | 81.71  | WT | HAAQR[G]HY    | 97.24    | 9  | 4.0364    |
| Se128 | RIPK4 G615V     | HLA-C*03:02 | MT | LAAQR[V]HYRV | 263.48 | WT | LAAQR[G]HYRV  | 221.16   | 10 | 4.0364    |
| Se128 | RIPK4 G615V     | HLA-C*03:02 | MT | R[V]HYRVARIL | 366.31 | WT | R[G]HYRVARIL  | 2438.87  | 10 | 4.0364    |
| Se128 | NHSL2 A523T     | HLA-C*03:02 | MT | KANEAC[T]LPF | 4.8    | WT | KANEAC[A]LPF  | 5.53     | 10 | 1.10333   |
| Se128 | NHSL2 A523T     | HLA-C*03:03 | MT | KANEAC[T]LPF | 18.32  | WT | KANEAC[A]LPF  | 22.97    | 10 | 1.10333   |
| Se128 | NHSL2 A523T     | HLA-B*58:01 | MT | KANEAC[T]LPF | 27.82  | WT | KANEAC[A]LPF  | 27.45    | 10 | 1.10333   |
| Se128 | NHSL2 A523T     | HLA-B*15:01 | MT | KANEAC[T]LPF | 41.64  | WT | KANEAC[A]LPF  | 53.59    | 10 | 1.10333   |
| Se128 | LAGE3 R143H     | HLA-B*15:01 | MT | MQRFGPPVS[H] | 257.01 | WT | MQRFGPPVS[R]  | 5303.43  | 10 | 26.46449  |
| Se129 | SPEN S1424N     | HLA-A*11:01 | MT | RLS[N]SLERNK | 184.8  | WT | RLS[S]SLERNK  | 157.57   | 10 | 10.31651  |
| Se129 | SPEN S1424N     | HLA-A*11:01 | MT | LS[N]SLERNK  | 465.61 | WT | LS[S]SLERNK   | 592.88   | 9  | 10.31651  |
| Se129 | PQLC2 S126P     | HLA-A*24:02 | MT | YYKFRTRP[P]L | 149.78 | WT | YYKFRTRP[S]L  | 151.74   | 10 | 5.08036   |
| Se129 | MEF2D R15Q      | HLA-A*11:01 | MT | E[R]NRQVTFTK | 370.79 | WT | E[R]NRQVTFTK  | 15901.45 | 10 | 8.96044   |
| Se129 | NID1 P557S      | HLA-C*12:02 | MT | [S]QIPFGSSV  | 96.61  | WT | [P]QIPFGSSV   | 5237.02  | 9  | 9.41431   |
| Se129 | BIRC6 V3258G    | HLA-B*35:01 | MT | TPV[G]TSLGTY | 5.34   | WT | TPV[V]TSLGTY  | 7.42     | 10 | 5.70943   |
| Se129 | BIRC6 V3258G    | HLA-A*11:01 | MT | [G]TSLGTYIK  | 22.66  | WT | [V]TSLGTYIK   | 25.51    | 9  | 5.70943   |
| Se129 | BIRC6 V3258G    | HLA-C*03:03 | MT | LSTPV[G]TSGL | 230.38 | WT | LSTPV[V]TSGL  | 257.5    | 10 | 5.70943   |
| Se129 | BIRC6 V3258G    | HLA-C*12:02 | MT | LSTPV[G]TSGL | 384    | WT | LSTPV[V]TSGL  | 259.75   | 10 | 5.70943   |
| Se129 | UBXN4 A99S      | HLA-C*03:03 | MT | IAGSV[S]DEL  | 239.92 | WT | IAGSV[S]ADEL  | 260.17   | 10 | 44.04149  |
| Se129 | UBXN4 A99S      | HLA-A*11:01 | MT | SVS[S]DELVTR | 368.04 | WT | SVS[A]DELVTR  | 327.39   | 10 | 44.04149  |
| Se129 | TAMM41 T162I    | HLA-C*03:03 | MT | SAV[I]AAFLML | 48.59  | WT | SAV[T]AAFLML  | 21.46    | 10 | 4.5012    |
| Se129 | TAMM41 T162I    | HLA-C*03:03 | MT | SAV[I]AAFLM  | 113.95 | WT | SAV[T]AAFLM   | 43.3     | 9  | 4.5012    |
| Se129 | TAMM41 T162I    | HLA-C*12:02 | MT | SAV[I]AAFLM  | 331.26 | WT | SAV[T]AAFLM   | 99.37    | 9  | 4.5012    |
| Se129 | TAMM41 T162I    | HLA-C*03:03 | MT | AV[I]AAFLML  | 336.06 | WT | AV[T]AAFLML   | 652.99   | 9  | 4.5012    |
| Se129 | TAMM41 T162I    | HLA-B*35:01 | MT | SAV[I]AAFLM  | 336.22 | WT | SAV[T]AAFLM   | 134.63   | 9  | 4.5012    |
| Se129 | RAD54L2 S385Y   | HLA-C*12:02 | MT | KTMA[Y]RAKVM | 206.01 | WT | KTMA[S]RAKVM  | 226.76   | 10 | 2.92893   |
| Se129 | RAD54L2 S385Y   | HLA-C*03:03 | MT | KTMA[Y]RAKVM | 320.76 | WT | KTMA[S]RAKVM  | 275.34   | 10 | 2.92893   |
| Se129 | RAD54L2 S385Y   | HLA-A*24:02 | MT | A[Y]RAKVMAD  | 331.43 | WT | A[S]RAKVMADW  | 17739.39 | 10 | 2.92893   |
| Se129 | RAD54L2 S385Y   | HLA-C*12:02 | MT | KTMA[Y]RAKV  | 486.73 | WT | KTMA[S]RAKV   | 514.9    | 9  | 2.92893   |
| Se129 | FAM208A T1150A  | HLA-B*35:01 | MT | NSNS[A]EQDSY | 178.09 | WT | NSNS[T]EQDSY  | 214.32   | 10 | 19.84774  |
| Se129 | PBX3 R304H      | HLA-C*12:02 | MT | SQVDTL[H]HV  | 308.1  | WT | SQVDTL[R]HV   | 328.98   | 9  | 9.3255    |
| Se129 | ARHGAP21 T1114I | HLA-A*11:01 | MT | LSKDD[I]SPPK | 197.68 | WT | LSKDD[T]SPPK  | 294.34   | 10 | 27.708    |
| Se129 | TOLLIP P220L    | HLA-B*35:01 | MT | VPVALP[L]AA  | 76.57  | WT | VPVALP[P]AA   | 144.06   | 9  | 8.09915   |
| Se129 | TOLLIP P220L    | HLA-B*35:01 | MT | VPVALP[L]AA  | 76.57  | WT | VPVALP[P]AA   | 144.06   | 9  | 8.20617   |
| Se129 | TOLLIP P220L    | HLA-B*35:01 | MT | VPVALP[L]AAV | 139.58 | WT | VPVALP[P]AAV  | 159.68   | 10 | 8.09915   |
| Se129 | TOLLIP P220L    | HLA-B*35:01 | MT | VPVALP[L]AAV | 139.58 | WT | VPVALP[P]AAV  | 159.68   | 10 | 8.20617   |
| Se129 | TOLLIP P220L    | HLA-C*03:03 | MT | GMVPVALP[L]  | 192.79 | WT | GMVPVALP[P]   | 26637.28 | 9  | 8.09915   |
| Se129 | TOLLIP P220L    | HLA-C*03:03 | MT | GMVPVALP[L]  | 192.79 | WT | GMVPVALP[P]   | 26637.28 | 9  | 8.20617   |
| Se129 | TOLLIP P220L    | HLA-B*35:01 | MT | LP[L]AAVNAQ  | 203.38 | WT | LP[P]AAVNAQ   | 3092.67  | 9  | 8.09915   |
| Se129 | TOLLIP P220L    | HLA-B*35:01 | MT | LP[L]AAVNAQ  | 203.38 | WT | LP[P]AAVNAQ   | 3092.67  | 9  | 8.20617   |
| Se129 | TOLLIP P220L    | HLA-B*78:02 | MT | VPVALP[L]AAV | 401.36 | WT | VPVALP[P]AAV  | 541.43   | 10 | 8.09915   |
| Se129 | TOLLIP P220L    | HLA-B*78:02 | MT | VPVALP[L]AAV | 401.36 | WT | VPVALP[P]AAV  | 541.43   | 10 | 8.20617   |
| Se129 | ITPR2 R1547H    | HLA-C*12:02 | MT | VAKN[H]GIAI  | 442.42 | WT | VAKN[R]GIAI   | 570.82   | 9  | 3.43672   |
| Se129 | ITPR2 R1547H    | HLA-C*03:03 | MT | VAKN[H]GIAI  | 442.78 | WT | VAKN[R]GIAI   | 912.99   | 9  | 3.43672   |
| Se129 | DIAPH3 P16H     | HLA-C*03:03 | MT | KAVD[H]RHPNM | 77.24  | WT | KAVD[P]RHPNM  | 105.03   | 10 | 5.75821   |
| Se129 | DIAPH3 P16H     | HLA-C*12:02 | MT | KAVD[H]RHPNM | 135.27 | WT | KAVD[P]RHPNM  | 162.74   | 10 | 5.75821   |
| Se129 | EIF2AK4 M149V   | HLA-A*11:01 | MT | KSFHEE[V]LER | 107.13 | WT | KSFHEE[M]LER  | 68.2     | 10 | 6.90771   |
| Se129 | ZNF521 V354I    | HLA-A*11:01 | MT | S[I]LKLKHK   | 131.33 | WT | S[V]LKLKHK    | 95.63    | 10 | 2.78138   |
| Se129 | ZNF521 V354I    | HLA-A*11:01 | MT | NSPIFNS[V]LK | 168.49 | WT | NSPIFNS[V]LK  | 226.65   | 10 | 2.78138   |
| Se129 | ZNF521 V354I    | HLA-B*35:01 | MT | SPIFNS[V]LKL | 229.21 | WT | SPIFNS[V]LKL  | 242.54   | 10 | 2.78138   |
| Se129 | THOP1 H391Y     | HLA-B*35:01 | MT | SAW[Y]EDVRLY | 39.35  | WT | SAW[H]EDVRLY  | 51.6     | 10 | 10.84428  |
| Se129 | THOP1 H391Y     | HLA-C*03:03 | MT | SAW[Y]EDVRL  | 424.1  | WT | SAW[H]EDVRL   | 407.81   | 9  | 10.84428  |
| Se129 | ATP13A1 D541Y   | HLA-A*11:01 | MT | LTS[Y]SLVVR  | 362.06 | WT | LTS[D]SLVVR   | 437.88   | 9  | 20.0579   |
| Se129 | ATP13A1 D541Y   | HLA-C*12:02 | MT | TS[Y]SLVVRGV | 364.48 | WT | TS[D]SLVVRGV  | 5166.13  | 10 | 20.0579   |
| Se129 | FOXA3 R160H     | HLA-A*24:02 | MT | YYRENQQ[H]W  | 72.27  | WT | YYRENQQ[R]W   | 69.83    | 9  | 2.41168   |
| Se129 | FOXA3 R160H     | HLA-B*35:01 | MT | FPYRENQQ[H]  | 262.23 | WT | FPYRENQQ[R]   | 6871.53  | 10 | 2.41168   |
| Se129 | ZMYND8 T230M    | HLA-A*11:01 | MT | [M]QIAKVVVK  | 85.29  | WT | [T]QIAKVVVK   | 110.07   | 9  | 8.95143   |
| Se129 | CLCN5 R563C     | HLA-B*35:01 | MT | DAH[I]CJLNGY | 174.5  | WT | DAH[R]CJLNGY  | 1144.79  | 9  | 1.26737   |
| Se129 | CLCN5 R563C     | HLA-B*35:01 | MT | HI[C]JLNGYPF | 243.19 | WT | HI[R]CJLNGYPF | 232.05   | 9  | 1.26737   |
| Se130 | GPR161 A141T    | HLA-A*11:01 | MT | RVARVK[T]RK  | 64.7   | WT | RVARVK[A]RK   | 57.29    | 9  | 6.537     |
| Se130 | EPCAM V6I       | HLA-C*12:02 | MT | MAPPQ[I]LAF  | 53.34  | WT | MAPPQ[V]LAF   | 48.84    | 9  | 134.91812 |
| Se130 | FLNB G972V      | HLA-C*12:02 | MT | FTVDTRGA[V]  | 18.92  | WT | FTVDTRGA[G]   | 1900.76  | 9  | 27.56892  |
| Se130 | SORCS2 T893K    | HLA-A*11:01 | MT | GLNQEVNL[K]  | 247.22 | WT | GLNQEVNL[T]   | 36093.39 | 9  | 2.6874    |
| Se130 | TBC1D1 K787M    | HLA-A*11:01 | MT | RSK[I]M]FDMK | 73.29  | WT | RSK[K]M]FDMK  | 222.71   | 10 | 20.24046  |
| Se130 | KIAA0922 G973V  | HLA-A*11:01 | MT | ATY[V]HSQKK  | 10.58  | WT | ATY[G]HSQKK   | 8.7      | 9  | 5.31049   |
| Se130 | ZNF391 K200I    | HLA-C*12:02 | MT | [I]AFSRSTNL  | 37.28  | WT | [K]AFSRSTNL   | 94.07    | 9  | 2.71947   |
| Se130 | C2 L126P        | HLA-B*55:02 | MT | L[P]LDLCSQSV | 187.07 | WT | L[L]LDLCSQSV  | 10755.88 | 9  | 45.87171  |
| Se130 | IGF2R T1015S    | HLA-C*12:02 | MT | LS[S]JEGFITL | 216.97 | WT | LS[T]JEGFITL  | 392.24   | 9  | 20.9876   |
| Se130 | ORC5 L351P      | HLA-A*11:01 | MT | KTSNH[P]LGPK | 17.51  | WT | KTSNH[L]LGPK  | 11.7     | 10 | 11.82873  |
| Se130 | ORC5 L351P      | HLA-A*11:01 | MT | TSNH[P]LGPK  | 18.5   | WT | TSNH[L]LGPK   | 22.38    | 9  | 11.82873  |
| Se130 | PUF60 V333I     | HLA-C*12:02 | MT | MAAQAPG[I]I  | 184.14 | WT | MAAQAPG[V]I   | 93.38    | 9  | 133.47491 |
| Se130 | PUF60 V333I     | HLA-C*12:02 | MT | AQAPG[I]ITGV | 399.68 | WT | AQAPG[V]ITGV  | 364.33   | 10 | 133.47491 |
| Se130 | PUF60 V333I     | HLA-A*11:01 | MT | G[I]ITGVTPAR | 492.35 | WT | G[V]ITGVTPAR  | 245.11   | 10 | 133.47491 |
| Se130 | AQP3 Y104C      | HLA-B*55:02 | MT | LPI[C]TLAQT  | 410.22 | WT | LPI[Y]TLAQT   | 515.68   | 9  | 2.7769    |
| Se130 | RASSF4 L28V     | HLA-A*11:01 | MT | KSELLGL[L]K  | 354.08 | WT | KSELLGL[L]K   | 98.06    | 9  | 20.58295  |
| Se130 | SBF2 I1318V     | HLA-A*11:01 | MT | AALY[I]FGEK  | 50.51  | WT | AALY[V]FGEK   | 53.24    | 9  | 5.04104   |
| Se130 | SBF2 I1318V     | HLA-A*11:01 | MT | QAALY[V]FGEK | 107.18 | WT | QAALY[I]FGEK  | 111.05   | 10 | 5.04104   |
| Se130 | SBF2 I1318V     | HLA-C*12:02 | MT | Y[V]FGEKSQL  | 434.94 | WT | Y[I]FGEKSQL   | 818.37   | 9  | 5.04104   |

|       |                |             |    |               |        |    |               |          |    |           |
|-------|----------------|-------------|----|---------------|--------|----|---------------|----------|----|-----------|
| Se130 | SBF2 I1318V    | HLA-A*11:01 | MT | Y[V]FGEKSQLR  | 459.06 | WT | Y[I]FGEKSQLR  | 636.47   | 10 | 5.04104   |
| Se130 | APLP2 E49V     | HLA-C*12:02 | MT | FAVA[V]PQIAM  | 10.39  | WT | FAVA[E]PQIAM  | 22.35    | 10 | 175.38837 |
| Se130 | APLP2 E49V     | HLA-C*12:02 | MT | FAVA[V]PQIA   | 148.04 | WT | FAVA[E]PQIA   | 861.64   | 9  | 175.38837 |
| Se130 | APLP2 E49V     | HLA-C*12:02 | MT | VA[V]PQIAMF   | 179.76 | WT | VA[E]PQIAMF   | 978.08   | 9  | 175.38837 |
| Se130 | PLEKHG6 E244Q  | HLA-A*24:02 | MT | R[Q]QQETNPLF  | 497.1  | WT | R[E]QQETNPLF  | 4848.97  | 10 | 3.42479   |
| Se130 | ORMDL2 A121S   | HLA-A*24:02 | MT | KYD[S]AHFLI   | 18.74  | WT | KYD[A]AHFLI   | 16.69    | 9  | 24.50457  |
| Se130 | ORMDL2 A121S   | HLA-A*24:02 | MT | FYTKYD[S]AHF  | 52.57  | WT | FYTKYD[A]AHF  | 56.77    | 10 | 24.50457  |
| Se130 | ORMDL2 A121S   | HLA-C*12:02 | MT | YTKYD[S]AHF   | 113.23 | WT | YTKYD[A]AHF   | 124.56   | 9  | 24.50457  |
| Se130 | ORMDL2 A121S   | HLA-C*12:02 | MT | YTKYD[S]AHFL  | 114.49 | WT | YTKYD[A]AHFL  | 105.01   | 10 | 24.50457  |
| Se130 | ZDHHYC17 Y223S | HLA-A*11:01 | MT | SVNLGDK[S]JHK | 182.6  | WT | SVNLGDK[Y]JHK | 81.95    | 10 | 5.6965    |
| Se130 | RNF213 S4922R  | HLA-A*11:01 | MT | HV[I]R]YEVEER | 416.03 | WT | HV[I]S]YEVEER | 366.43   | 9  | 21.12122  |
| Se130 | NPLOC4 D111H   | HLA-A*11:01 | MT | [H]QYLSKQDQK  | 383.35 | WT | [D]QYLSKQDQK  | 6502.64  | 10 | 25.50451  |
| Se130 | ANKRD27 H754R  | HLA-A*11:01 | MT | SSPLHVAAL[R]  | 343.9  | WT | SSPLHVAAL[H]  | 4683.47  | 10 | 12.27031  |
| Se130 | ZNF671 R408W   | HLA-C*12:02 | MT | FS[W]KHTLVL   | 26.24  | WT | FS[R]KHTLVL   | 26.49    | 9  | 2.35972   |
| Se130 | ZNF671 R408W   | HLA-C*01:02 | MT | FS[W]KHTLVL   | 453.2  | WT | FS[R]KHTLVL   | 855.05   | 9  | 2.35972   |
| Se130 | PABPC1L P457T  | HLA-C*12:02 | MT | R[T]PAHISSV   | 120.94 | WT | R[P]PAHISSV   | 2748.36  | 9  | 3.85177   |
| Se130 | PABPC1L P457T  | HLA-A*11:01 | MT | R[T]PAHISSVR  | 375.28 | WT | R[P]PAHISSVR  | 22353.17 | 10 | 3.85177   |
| Se130 | LAMA5 E2916D   | HLA-C*12:02 | MT | YNF[D]RTFQL   | 73.7   | WT | YNF[E]RTFQL   | 120.01   | 9  | 88.27905  |
| Se130 | LAMA5 E2916D   | HLA-A*11:01 | MT | VVSLYNF[D]R   | 235.01 | WT | VVSLYNF[E]R   | 71.78    | 9  | 88.27905  |
| Se130 | LAMA5 E2916D   | HLA-A*24:02 | MT | LYNF[D]RTFQL  | 252.9  | WT | LYNF[E]RTFQL  | 154.54   | 10 | 88.27905  |
| Se130 | LAMA5 E2916D   | HLA-C*12:02 | MT | SLYNF[D]RTF   | 439.82 | WT | SLYNF[E]RTF   | 1342.22  | 9  | 88.27905  |
| Se130 | IL17RA D538A   | HLA-A*24:02 | MT | RQLRAAL[A]RF  | 366.99 | WT | RQLRAAL[D]RF  | 842.16   | 10 | 7.34018   |
| Se130 | SNAP29 L31F    | HLA-B*55:02 | MT | [F]PDGPDAPA   | 74.92  | WT | [L]PDGPDAPA   | 274.95   | 9  | 13.47533  |
| Se130 | TMLHE S88F     | HLA-A*11:01 | MT | RSASCYN[F]K   | 7.34   | WT | RSASCYN[S]K   | 16.21    | 9  | 7.28871   |
| Se130 | TMLHE S88F     | HLA-C*12:02 | MT | YN[F]KTHQRS   | 431.69 | WT | YN[S]KTHQRS   | 1040.58  | 10 | 7.28871   |
| Se131 | CACHD1 R150Q   | HLA-A*24:02 | MT | FYTNLNP[Q]MI  | 149.17 | WT | FYTNLNP[R]MI  | 434.47   | 10 | 3.89138   |
| Se131 | CACHD1 R150Q   | HLA-C*12:02 | MT | YTNLNP[Q]MI   | 183.7  | WT | YTNLNP[R]MI   | 251.18   | 9  | 3.89138   |
| Se131 | CACHD1 R150Q   | HLA-C*12:02 | MT | FYTNLNP[Q]MI  | 259.69 | WT | FYTNLNP[R]MI  | 218.58   | 9  | 3.89138   |
| Se131 | CACHD1 R150Q   | HLA-A*24:08 | MT | FYTNLNP[Q]MI  | 371.7  | WT | FYTNLNP[R]MI  | 971.33   | 10 | 3.89138   |
| Se131 | CID T73S       | HLA-C*12:02 | MT | WVYLA[S]QGV   | 197.14 | WT | WVYLA[T]QGV   | 133.11   | 9  | 9.30985   |
| Se131 | PDE1A V219F    | HLA-C*12:02 | MT | LAM[F]FAAAI   | 62.86  | WT | LAM[V]FAAAI   | 68.21    | 9  | 10.22433  |
| Se131 | PDE1A V219F    | HLA-B*52:01 | MT | LAM[F]FAAAI   | 483.51 | WT | LAM[V]FAAAI   | 516.93   | 9  | 10.22433  |
| Se131 | ENTPD4 A160S   | HLA-C*12:02 | MT | F[S]AEHVPRA   | 239.74 | WT | F[A]AEHVPRA   | 109.77   | 9  | 7.61548   |
| Se131 | DEAF1 P204L    | HLA-C*12:02 | MT | SVYDSEL[L]V   | 394.03 | WT | SVYDSEL[P]V   | 83.21    | 9  | 6.81956   |
| Se131 | QSER1 T1248I   | HLA-A*24:02 | MT | AYKSVS[I]PL   | 278.39 | WT | AYKSVS[T]PL   | 557.24   | 9  | 9.64947   |
| Se131 | QSER1 T1248I   | HLA-C*12:02 | MT | KSVS[I]PLTTL  | 372.71 | WT | KSVS[T]PLTTL  | 433.96   | 10 | 9.64947   |
| Se131 | QSER1 T1248I   | HLA-C*12:02 | MT | DAYKSVS[I]PL  | 466.13 | WT | DAYKSVS[T]PL  | 308.89   | 10 | 9.64947   |
| Se131 | UTP20 R1043W   | HLA-A*24:02 | MT | RMAIVL[W]JF   | 324.13 | WT | RMAIVL[R]JF   | 2502.64  | 9  | 3.56485   |
| Se131 | UTP20 R1043W   | HLA-A*24:08 | MT | RMAIVL[W]JF   | 379.35 | WT | RMAIVL[R]JF   | 2516.92  | 9  | 3.56485   |
| Se131 | UBAC2 R90K     | HLA-A*24:02 | MT | RYGS[K]KFASF  | 19.32  | WT | RYGS[R]KFASF  | 13.54    | 10 | 17.02984  |
| Se131 | UBAC2 R90K     | HLA-A*24:08 | MT | RYGS[K]KFASF  | 172.96 | WT | RYGS[R]KFASF  | 116.99   | 10 | 17.02984  |
| Se131 | UBAC2 R90K     | HLA-C*12:02 | MT | YGS[K]KFASF   | 287.57 | WT | YGS[R]KFASF   | 453.01   | 9  | 17.02984  |
| Se131 | TM9SF1 G453V   | HLA-C*12:02 | MT | LSV[G]STGLF   | 341.49 | WT | LSV[J]STGLF   | 227.94   | 9  | 28.83419  |
| Se131 | AP4E1 D965N    | HLA-A*24:02 | MT | [N]FGKLWLSF   | 66.79  | WT | [D]FGKLWLSF   | 386.33   | 9  | 2.10488   |
| Se131 | AP4E1 D965N    | HLA-A*24:08 | MT | [N]FGKLWLSF   | 308.53 | WT | [D]FGKLWLSF   | 1907.68  | 9  | 2.10488   |
| Se131 | AP4E1 D965N    | HLA-C*12:02 | MT | ISSD[D]FGKL   | 383.51 | WT | ISSD[J]FGKL   | 1296.1   | 9  | 2.10488   |
| Se131 | VPS13C E2692A  | HLA-A*24:02 | MT | TLP[A]FFPVCF  | 383.35 | WT | TLP[E]FFPVCF  | 702.49   | 10 | 4.60838   |
| Se131 | IGDCC4 N1145K  | HLA-C*12:02 | MT | FSASNG[K]PDL  | 478.04 | WT | FSASNG[N]PDL  | 188.17   | 10 | 1.10792   |
| Se131 | TMEM208 F118L  | HLA-C*12:02 | MT | TAIVQVLSL[F]  | 419.75 | WT | TAIVQVLSL[F]  | 459.15   | 10 | 22.70779  |
| Se131 | SCRN2 S288R    | HLA-C*12:02 | MT | TTA[R]MVSVL   | 373.18 | WT | TTA[S]MVSVL   | 186.49   | 9  | 9.93327   |
| Se131 | SCRN2 S288R    | HLA-C*12:02 | MT | RTTA[R]MVSVL  | 376.15 | WT | RTTA[S]MVSVL  | 416.95   | 10 | 9.93327   |
| Se131 | SCRN2 S288R    | HLA-C*12:02 | MT | RTTA[R]MVSV   | 384.19 | WT | RTTA[S]MVSV   | 386.36   | 9  | 9.93327   |
| Se131 | CACNG4 V303M   | HLA-A*24:02 | MT | SFLQ[V]HDFD   | 36.22  | WT | SFLQ[V]HDFD   | 32.64    | 9  | 5.3491    |
| Se131 | CACNG4 V303M   | HLA-A*24:08 | MT | SFLQ[M]HDFD   | 155.46 | WT | SFLQ[V]HDFD   | 163.81   | 9  | 5.3491    |
| Se131 | NFATC1 R108S   | HLA-C*12:02 | MT | HT[R]PDGAPAL  | 382.55 | WT | HT[R]PDGAPAL  | 536.4    | 10 | 1.42682   |
| Se131 | TEF K177M      | HLA-A*24:02 | MT | LFNPRKH[M]F   | 318.33 | WT | LFNPRKH[K]F   | 481.46   | 9  | 3.51723   |
| Se132 | UBR4 R2974H    | HLA-A*02:06 | MT | RLHMV[H]LMLL  | 387.4  | WT | RLHMV[R]LMLL  | 739.41   | 10 | 6.00593   |
| Se132 | DNTTIP2 L252I  | HLA-A*02:06 | MT | LQARS[I]SEI   | 135.16 | WT | LQARS[L]SEI   | 88.82    | 9  | 34.95788  |
| Se132 | TOMM40L L73F   | HLA-C*03:04 | MT | SALG[F]PGYHL  | 155.33 | WT | SALG[L]PGYHL  | 204.58   | 10 | 5.62372   |
| Se132 | TOMM40L L73F   | HLA-C*03:04 | MT | HTIHMSALG[F]  | 335.03 | WT | HTIHMSALG[L]  | 82.72    | 10 | 5.62372   |
| Se132 | TOMM40L L73F   | HLA-A*02:06 | MT | SALG[F]PGYHL  | 422.43 | WT | SALG[L]PGYHL  | 728.9    | 10 | 5.62372   |
| Se132 | RGS16 D153H    | HLA-C*03:04 | MT | [H]AAQGKTRTL  | 39.32  | WT | [D]AAQGKTRTL  | 2120.12  | 10 | 16.75319  |
| Se132 | RGS16 D153H    | HLA-A*02:06 | MT | ATATCF[H]AA   | 53.83  | WT | ATATCF[D]AA   | 215.59   | 9  | 16.75319  |
| Se132 | C1orf106 G299S | HLA-A*02:06 | MT | WQ[S]RTSAPA   | 264.85 | WT | WQ[G]RTSAPA   | 822.13   | 9  | 24.60138  |
| Se132 | ATP2B4 L1002V  | HLA-A*02:06 | MT | NIIFCSVV[V]   | 121.15 | WT | NIIFCSVV[L]   | 587.03   | 9  | 46.54804  |
| Se132 | ATP2B4 L1002V  | HLA-A*02:06 | MT | VV[V]GTFICQI  | 282.1  | WT | VV[L]GTFICQI  | 125.33   | 10 | 46.54804  |
| Se132 | PLXNA2 V1183G  | HLA-A*02:06 | MT | [G]LIGETPCAV  | 18.85  | WT | [V]LIGETPCAV  | 16.77    | 10 | 2.83442   |
| Se132 | PLXNA2 V1183G  | HLA-A*02:06 | MT | [G]LIGETPCA   | 180.65 | WT | [V]LIGETPCA   | 174.29   | 9  | 2.83442   |
| Se132 | ROCK2 C1257F   | HLA-A*02:06 | MT | YI[F]HKGHEFI  | 33.53  | WT | YI[C]HKGHEFI  | 386.7    | 10 | 7.01295   |
| Se132 | ROCK2 C1257F   | HLA-C*03:04 | MT | YI[F]HKGHEF   | 45.07  | WT | YI[C]HKGHEF   | 1102.7   | 9  | 7.01295   |
| Se132 | ROCK2 C1257F   | HLA-A*02:06 | MT | YI[F]HKGHEF   | 305.75 | WT | YI[C]HKGHEF   | 3326.89  | 9  | 7.01295   |
| Se132 | ROCK2 C1257F   | HLA-C*03:04 | MT | YI[F]HKGHEFI  | 404.89 | WT | YI[C]HKGHEFI  | 6300.56  | 10 | 7.01295   |
| Se132 | BIRC6 I2111M   | HLA-A*02:06 | MT | LL[M]FPQDRV   | 79.65  | WT | LL[I]FPQDRV   | 251.05   | 9  | 8.30844   |
| Se132 | BIRC6 I2111M   | HLA-C*03:04 | MT | L[M]FPQDRVF   | 306.26 | WT | L[I]FPQDRVF   | 411.08   | 9  | 8.30844   |
| Se132 | BIRC6 I2111M   | HLA-A*02:06 | MT | QLL[M]FPQDRV  | 320.93 | WT | QLL[I]FPQDRV  | 497.56   | 10 | 8.30844   |
| Se132 | BIRC6 I2111M   | HLA-C*03:04 | MT | L[M]FPQDRVFM  | 349.33 | WT | L[I]FPQDRVFM  | 610.45   | 10 | 8.30844   |
| Se132 | BIRC6 I2111M   | HLA-A*02:06 | MT | L[M]FPQDRVFM  | 409.19 | WT | L[I]FPQDRVFM  | 1552.54  | 10 | 8.30844   |
| Se132 | TMEM131 F632L  | HLA-C*03:04 | MT | LASGYFAV[L]   | 15.05  | WT | LASGYFAV[F]   | 24.3     | 9  | 10.81397  |

|       |               |             |    |                |        |    |                |          |    |           |
|-------|---------------|-------------|----|----------------|--------|----|----------------|----------|----|-----------|
| Se132 | TMEM131 F632L | HLA-A*02:06 | MT | TLASGYFAV[L]   | 56.38  | WT | TLASGYFAV[F]   | 372.74   | 10 | 10.81397  |
| Se132 | TMEM131 F632L | HLA-C*03:04 | MT | FAV[L]RVKLT    | 270.65 | WT | FAV[F]RVKLT    | 216.38   | 10 | 10.81397  |
| Se132 | TMEM131 F632L | HLA-C*03:04 | MT | TLASGYFAV[L]   | 274.03 | WT | TLASGYFAV[F]   | 716.24   | 10 | 10.81397  |
| Se132 | REV1 G58A     | HLA-A*02:06 | MT | YVN[A]YTDPSA   | 90.39  | WT | YVN[G]YTDPSA   | 111.44   | 10 | 10.87433  |
| Se132 | SH3RF3 R535L  | HLA-C*03:04 | MT | VPAGGAGPP[L]   | 361.42 | WT | VPAGGAGPP[R]   | 35114.27 | 10 | 1.36037   |
| Se132 | SLC6A6 C112W  | HLA-A*02:06 | MT | IT[W]WEKICPL   | 109.99 | WT | IT[C]WEKICPL   | 1051.16  | 10 | 7.39484   |
| Se132 | SLC6A6 C112W  | HLA-C*03:04 | MT | YTSEGGIT[W]    | 358.2  | WT | YTSEGGIT[C]    | 2878.99  | 9  | 7.39484   |
| Se132 | MITF A57T     | HLA-A*02:06 | MT | TTLPS[T]TQV    | 143.86 | WT | TTLPS[A]TQV    | 209.71   | 9  | 1.24503   |
| Se132 | MITF A57T     | HLA-C*03:04 | MT | S[T]TQVPMEV    | 330.53 | WT | S[A]TQVPMEV    | 43.36    | 10 | 1.24503   |
| Se132 | ABTB1 I38F    | HLA-A*02:06 | MT | YTGRLD[F]GV    | 59.88  | WT | YTGRLD[I]GV    | 282.53   | 9  | 15.08867  |
| Se132 | ABTB1 I38F    | HLA-A*02:06 | MT | RLD[F]GVEHV    | 83.62  | WT | RLD[I]GVEHV    | 207.76   | 9  | 15.08867  |
| Se132 | ABTB1 I38F    | HLA-C*03:04 | MT | YLYTGRLD[F]    | 142.7  | WT | YLYTGRLD[I]    | 311.96   | 9  | 15.08867  |
| Se132 | HPS3 D135H    | HLA-A*02:06 | MT | FAP[H]ISSYV    | 6.63   | WT | FAP[D]ISSYV    | 4.09     | 9  | 11.28444  |
| Se132 | HPS3 D135H    | HLA-C*03:04 | MT | FAP[H]ISSYVL   | 7.75   | WT | FAP[D]ISSYVL   | 6.7      | 10 | 11.28444  |
| Se132 | HPS3 D135H    | HLA-C*03:04 | MT | FAP[H]ISSYV    | 39     | WT | FAP[D]ISSYV    | 24.62    | 9  | 11.28444  |
| Se132 | HPS3 D135H    | HLA-A*02:06 | MT | LLYRRFAP[H]I   | 86.18  | WT | LLYRRFAP[D]I   | 416.95   | 10 | 11.28444  |
| Se132 | HPS3 D135H    | HLA-C*08:22 | MT | FAP[H]ISSYVL   | 103.47 | WT | FAP[D]ISSYVL   | 62.57    | 10 | 11.28444  |
| Se132 | HPS3 D135H    | HLA-C*08:22 | MT | FAP[H]ISSYV    | 121.52 | WT | FAP[D]ISSYV    | 57.48    | 9  | 11.28444  |
| Se132 | HPS3 D135H    | HLA-A*02:06 | MT | FAP[H]ISSYVL   | 141.26 | WT | FAP[D]ISSYVL   | 75.87    | 10 | 11.28444  |
| Se132 | HPS3 D135H    | HLA-A*02:06 | MT | RFAP[H]ISSYV   | 473.46 | WT | RFAP[D]ISSYV   | 604.75   | 10 | 11.28444  |
| Se132 | WWTR1 S5P     | HLA-C*03:04 | MT | NPA[P]APPL     | 493.25 | WT | NPA[S]APPL     | 1078.13  | 9  | 8.7532    |
| Se132 | CHRD D67N     | HLA-A*02:06 | MT | ALDETWH[P]N[L] | 47.65  | WT | ALDETWH[P]D[L] | 228.71   | 10 | 10.0312   |
| Se132 | CENPC M647I   | HLA-C*03:04 | MT | I[I]TAQNVPL    | 326.08 | WT | I[M]TAQNVPL    | 324.13   | 9  | 6.21147   |
| Se132 | TMEM192 L178V | HLA-C*03:04 | MT | LA[V]JELICSL   | 11.92  | WT | LA[L]JELICSL   | 22.28    | 9  | 6.83705   |
| Se132 | TMEM192 L178V | HLA-A*02:06 | MT | ILA[V]JELICSL  | 78.72  | WT | ILA[L]JELICSL  | 103.57   | 10 | 6.83705   |
| Se132 | TMEM192 L178V | HLA-A*02:06 | MT | LILAILA[V]JEL  | 113.73 | WT | LILAILA[L]JEL  | 118.71   | 10 | 6.83705   |
| Se132 | TMEM192 L178V | HLA-A*02:06 | MT | LA[V]JELICSL   | 220.61 | WT | LA[L]JELICSL   | 147.32   | 9  | 6.83705   |
| Se132 | TMEM192 L178V | HLA-A*02:06 | MT | ILAILA[V]JELI  | 328.53 | WT | ILAILA[L]JELI  | 248.11   | 10 | 6.83705   |
| Se132 | TMEM192 L178V | HLA-A*02:06 | MT | ILAILA[V]JEL   | 331.55 | WT | ILAILA[L]JEL   | 351.13   | 9  | 6.83705   |
| Se132 | TMEM192 L178V | HLA-C*03:04 | MT | LA[V]JELICSLI  | 346.27 | WT | LA[L]JELICSLI  | 734.66   | 10 | 6.83705   |
| Se132 | TMEM192 L178V | HLA-A*02:06 | MT | DLILAILA[V]    | 432.53 | WT | DLILAILA[L]    | 1375.22  | 9  | 6.83705   |
| Se132 | TMEM192 L178V | HLA-C*03:04 | MT | LAILA[V]JELI   | 483.85 | WT | LAILA[L]JELI   | 1212.54  | 9  | 6.83705   |
| Se132 | IL6ST M804I   | HLA-A*02:06 | MT | GQ[I]KMFQEV    | 7.02   | WT | GQ[M]KMFQEV    | 4.31     | 9  | 21.00332  |
| Se132 | GRAMD3 M238T  | HLA-A*02:06 | MT | [T]LHHILIFYA   | 37.27  | WT | [M]LHHILIFYA   | 11.57    | 10 | 4.60127   |
| Se132 | GRPEL2 R208H  | HLA-A*02:06 | MT | KLHG[H]TIRL    | 115.89 | WT | KLHG[R]TIRL    | 474.21   | 9  | 8.04462   |
| Se132 | GRPEL2 R208H  | HLA-A*02:06 | MT | [H]TIRLARVEV   | 256.09 | WT | [R]TIRLARVEV   | 214.9    | 10 | 8.04462   |
| Se132 | NEDD9 G116V   | HLA-A*02:06 | MT | YQNQ[V]IYQV    | 4.42   | WT | YQNQ[G]IYQV    | 3.34     | 9  | 10.71745  |
| Se132 | ITPR3 F994L   | HLA-A*02:06 | MT | SV[L]KKEFVEV   | 30.76  | WT | SV[F]KKEFVEV   | 16.85    | 10 | 31.08332  |
| Se132 | ITPR3 F994L   | HLA-A*02:06 | MT | V[L]KKEFVEV    | 113.44 | WT | V[F]KKEFVEV    | 6759.06  | 9  | 31.08332  |
| Se132 | ITPR3 F994L   | HLA-C*03:04 | MT | YRISYLLSV[L]   | 463.42 | WT | YRISYLLSV[F]   | 1989.67  | 10 | 31.08332  |
| Se132 | DST V3858F    | HLA-A*02:06 | MT | [F]QYQDGLQAV   | 7.12   | WT | [V]QYQDGLQAV   | 33.34    | 10 | 4.37954   |
| Se132 | DST V3858F    | HLA-A*02:06 | MT | [F]QYQDGLQA    | 156.85 | WT | [V]QYQDGLQA    | 1442.44  | 9  | 4.37954   |
| Se132 | DST V3858F    | HLA-C*03:04 | MT | [F]QYQDGLQAV   | 156.99 | WT | [V]QYQDGLQAV   | 1762.59  | 10 | 4.37954   |
| Se132 | DST V3858F    | HLA-C*03:04 | MT | AA[F]QYQDGL    | 370.72 | WT | AA[V]QYQDGL    | 818.56   | 9  | 4.37954   |
| Se132 | LACE1 F188L   | HLA-A*02:06 | MT | G[L]MAKSYDPI   | 37.35  | WT | G[F]MAKSYDPI   | 2465.66  | 10 | 1.32768   |
| Se132 | LACE1 F188L   | HLA-A*02:06 | MT | [L]MAKSYDPI    | 60.19  | WT | [F]MAKSYDPI    | 7.67     | 9  | 1.32768   |
| Se132 | LACE1 F188L   | HLA-A*02:06 | MT | [L]MAKSYDPIA   | 357.23 | WT | [F]MAKSYDPIA   | 31.75    | 10 | 1.32768   |
| Se132 | MDH2 A202G    | HLA-C*03:04 | MT | KAG[G]GSATL    | 143.11 | WT | KAG[A]GSATL    | 119.26   | 9  | 112.27126 |
| Se132 | ARPC1B D130H  | HLA-A*02:06 | MT | FEQEN[D]WVW    | 248.79 | WT | FEQEN[I]WVW    | 433.47   | 9  | 81.48526  |
| Se132 | KMT2E G1134R  | HLA-A*02:06 | MT | GLVSGF[R]RTV   | 407.45 | WT | GLVSGF[G]RTV   | 254.03   | 10 | 21.38676  |
| Se132 | MAK16 L91M    | HLA-C*03:04 | MT | KA[M]EQIDENL   | 90.77  | WT | KA[L]EQIDENL   | 570.98   | 10 | 5.62347   |
| Se132 | MAK16 L91M    | HLA-A*02:06 | MT | KA[M]EQIDENL   | 274.3  | WT | KA[L]EQIDENL   | 714.63   | 10 | 5.62347   |
| Se132 | CHD7 M7I      | HLA-C*03:04 | MT | MADPGM[I]SL    | 7.02   | WT | MADPGM[M]SL    | 5.54     | 9  | 2.26167   |
| Se132 | CHD7 M7I      | HLA-C*03:04 | MT | MADPGM[I]SLF   | 26.07  | WT | MADPGM[M]SLF   | 18.59    | 10 | 2.26167   |
| Se132 | CHD7 M7I      | HLA-C*08:22 | MT | MADPGM[I]SL    | 32.8   | WT | MADPGM[M]SL    | 31.7     | 9  | 2.26167   |
| Se132 | CHD7 M7I      | HLA-A*02:06 | MT | MADPGM[I]SL    | 120.55 | WT | MADPGM[M]SL    | 116.73   | 9  | 2.26167   |
| Se132 | CHD7 M7I      | HLA-C*08:22 | MT | MADPGM[I]SLF   | 151.43 | WT | MADPGM[M]SLF   | 118.7    | 10 | 2.26167   |
| Se132 | VPS13B A3424S | HLA-C*03:04 | MT | CV[S]PGAGPL    | 95.85  | WT | CV[A]PGAGPL    | 67.93    | 9  | 2.85842   |
| Se132 | VPS13B A3424S | HLA-A*02:06 | MT | NIFLCV[S]PGA   | 152.07 | WT | NIFLCV[A]PGA   | 143.23   | 10 | 2.85842   |
| Se132 | GRHL2 F23L    | HLA-C*03:04 | MT | VPMPSPDP[L]    | 110.79 | WT | VPMPSPDP[F]    | 162.08   | 9  | 5.74723   |
| Se132 | GRHL2 F23L    | HLA-C*03:04 | MT | LVPMPSPDP[L]   | 164.13 | WT | LVPMPSPDP[F]   | 475.94   | 10 | 5.74723   |
| Se132 | ENPP2 R203W   | HLA-A*02:06 | MT | GTHSPYM[W]PV   | 22.04  | WT | GTHSPYM[R]PV   | 394.76   | 10 | 2.35269   |
| Se132 | ENPP2 R203W   | HLA-A*02:06 | MT | YM[W]PVYPTKT   | 35.26  | WT | YM[R]PVYPTKT   | 2321.76  | 10 | 2.35269   |
| Se132 | ENPP2 R203W   | HLA-A*02:06 | MT | THSPYM[W]PV    | 354.12 | WT | THSPYM[R]PV    | 9983.96  | 9  | 2.35269   |
| Se132 | TRIM14 V326F  | HLA-C*03:04 | MT | FATGRHYWE[F]   | 20.32  | WT | FATGRHYWE[V]   | 51.97    | 10 | 5.39607   |
| Se132 | ZFAND4 G621R  | HLA-A*02:06 | MT | [R]VFLSTHGV    | 11.44  | WT | [G]VFLSTHGV    | 20.25    | 9  | 2.381     |
| Se132 | PITPNM1 S318L | HLA-C*03:04 | MT | WSSSRSSY[L]    | 80.41  | WT | WSSSRSSY[S]    | 18073.52 | 10 | 23.51921  |
| Se132 | PITPNM1 S318L | HLA-C*03:04 | MT | Y[L]SQHGGAV    | 134.16 | WT | Y[S]SQHGGAV    | 27.88    | 9  | 23.51921  |
| Se132 | PITPNM1 S318L | HLA-A*02:06 | MT | Y[L]SQHGGAV    | 205.52 | WT | Y[S]SQHGGAV    | 1171.39  | 9  | 23.51921  |
| Se132 | PITPNM1 S318L | HLA-C*03:04 | MT | SSSRSSY[S]     | 214.52 | WT | SSSRSSY[S]     | 22199.84 | 9  | 23.51921  |
| Se132 | NUDT4 C96F    | HLA-C*03:04 | MT | [F]SPANGNSTV   | 125.14 | WT | [C]SPANGNSTV   | 2473.81  | 10 | 23.02767  |
| Se132 | NUDT4 C96F    | HLA-A*02:06 | MT | [F]SPANGNSTV   | 144.98 | WT | [C]SPANGNSTV   | 1329.28  | 10 | 23.02767  |
| Se132 | NUDT4 C96F    | HLA-C*08:22 | MT | [F]SPANGNSTV   | 437.99 | WT | [C]SPANGNSTV   | 3279.14  | 10 | 23.02767  |
| Se132 | GNPTAB I354N  | HLA-A*02:06 | MT | GQ[N]PSWLNL    | 401.1  | WT | GQ[I]PSWLNL    | 71.36    | 9  | 4.97733   |
| Se132 | CENP1 A1183T  | HLA-A*02:06 | MT | S[T]DGKTTV     | 241.61 | WT | S[A]DGKTTV     | 623.77   | 9  | 3.65936   |
| Se132 | HSPH1 G266A   | HLA-A*02:06 | MT | SAVEIV[A]JGA   | 64.3   | WT | SAVEIV[G]JGA   | 336.96   | 9  | 32.46991  |
| Se132 | HSPH1 G266A   | HLA-A*02:06 | MT | IV[A]GATRIPA   | 388.56 | WT | IV[G]GATRIPA   | 1663.16  | 10 | 32.46991  |
| Se132 | PCDH17 W12R   | HLA-A*02:06 | MT | FLL[R]APALTL   | 30.98  | WT | FLL[W]APALTL   | 15.53    | 10 | 1.0768    |

|       |                 |             |    |              |        |    |              |          |    |          |
|-------|-----------------|-------------|----|--------------|--------|----|--------------|----------|----|----------|
| Se132 | PCDH17 W12R     | HLA-C*03:04 | MT | FLL[R]APALTL | 32.73  | WT | FLL[W]APALTL | 25.65    | 10 | 1.0768   |
| Se132 | PCDH17 W12R     | HLA-A*02:06 | MT | FLL[R]APALT  | 108.01 | WT | FLL[W]APALT  | 27.53    | 9  | 1.0768   |
| Se132 | PCDH17 W12R     | HLA-C*03:04 | MT | LL[R]APALTL  | 310.12 | WT | LL[W]APALTL  | 252.65   | 9  | 1.0768   |
| Se132 | PCDH17 W12R     | HLA-C*08:22 | MT | FLL[R]APALTL | 313.84 | WT | FLL[W]APALTL | 215.91   | 10 | 1.0768   |
| Se132 | TBC1D4 M992I    | HLA-A*02:06 | MT | IQ[I]YQLSRL  | 138.43 | WT | IQ[M]YQLSRL  | 62.97    | 9  | 1.91787  |
| Se132 | TBC1D4 M992I    | HLA-A*02:06 | MT | IQ[I]YQLSRL  | 187.82 | WT | IQ[M]YQLSRL  | 83.62    | 10 | 1.91787  |
| Se132 | TBC1D4 M992I    | HLA-A*02:06 | MT | MSLQIQ[I]YQL | 344.35 | WT | MSLQIQ[M]YQL | 306.1    | 10 | 1.91787  |
| Se132 | TBC1D4 M992I    | HLA-A*02:06 | MT | SLQIQ[I]YQL  | 374.06 | WT | SLQIQ[M]YQL  | 778.39   | 9  | 1.91787  |
| Se132 | ABCC4 I311M     | HLA-A*02:06 | MT | [M]QTFLLLDEI | 38.23  | WT | [I]QTFLLLDEI | 141.71   | 10 | 12.28274 |
| Se132 | ABCC4 I311M     | HLA-C*03:04 | MT | VSIRR[M]QTF  | 262.07 | WT | VSIRR[I]QTF  | 431.52   | 9  | 12.28274 |
| Se132 | ABCC4 I311M     | HLA-C*03:04 | MT | VSIRR[M]QTFL | 399.3  | WT | VSIRR[I]QTFL | 485.7    | 10 | 12.28274 |
| Se132 | LAMP1 L240V     | HLA-C*03:04 | MT | LASMGLQ[V]NL | 72.66  | WT | LASMGLQ[L]NL | 67.05    | 10 | 97.28725 |
| Se132 | LAMP1 L240V     | HLA-A*02:06 | MT | LLASMGLQ[V]  | 115.38 | WT | LLASMGLQ[L]  | 412.51   | 9  | 97.28725 |
| Se132 | LAMP1 L240V     | HLA-A*02:06 | MT | CLLASMGLQ[V] | 143.53 | WT | CLLASMGLQ[L] | 614.22   | 10 | 97.28725 |
| Se132 | AKAP6 V1408L    | HLA-A*02:06 | MT | QMGDAVN[L]L  | 221.41 | WT | QMGDAVN[V]L  | 733.32   | 9  | 1.09165  |
| Se132 | ATG2B T1944R    | HLA-C*03:04 | MT | MAALEL[R]NRM | 105.63 | WT | MAALEL[T]NRM | 38.25    | 10 | 2.3557   |
| Se132 | PLA2G4F H246N   | HLA-A*02:06 | MT | RL[N]VELMEL  | 213.08 | WT | RL[H]VELMEL  | 228.27   | 9  | 1.53153  |
| Se132 | PLA2G4F H246N   | HLA-A*02:06 | MT | RL[N]VELMELL | 358.45 | WT | RL[H]VELMELL | 410.87   | 10 | 1.53153  |
| Se132 | PLA2G4F H246N   | HLA-A*02:06 | MT | VLSSRL[N]VEL | 428.09 | WT | VLSSRL[H]VEL | 349.99   | 10 | 1.53153  |
| Se132 | PLA2G4F H246N   | HLA-C*03:04 | MT | LSSRL[N]VEL  | 480.74 | WT | LSSRL[H]VEL  | 302.04   | 9  | 1.53153  |
| Se132 | HAUS2 S194C     | HLA-A*02:06 | MT | FT[C]KVHVQTI | 477.74 | WT | FT[S]KVHVQTI | 159.22   | 10 | 6.15017  |
| Se132 | LCMT2 L279V     | HLA-A*02:06 | MT | DMNEFYHCF[V] | 121.21 | WT | DMNEFYHCF[L] | 683.1    | 10 | 7.0414   |
| Se132 | TMEM8A V123I    | HLA-A*02:06 | MT | [I]QPSFQVGV  | 34.62  | WT | [V]QPSFQVGV  | 52.37    | 9  | 15.8092  |
| Se132 | TMEM8A V123I    | HLA-A*02:06 | MT | A[I]QPSFQVGV | 88.66  | WT | A[V]QPSFQVGV | 74.51    | 10 | 15.8092  |
| Se132 | TMEM8A V123I    | HLA-A*02:06 | MT | TA[I]QPSFQV  | 228.71 | WT | TA[V]QPSFQV  | 535.41   | 9  | 15.8092  |
| Se132 | TMEM8A V123I    | HLA-C*03:04 | MT | TA[I]QPSFQV  | 284.28 | WT | TA[V]QPSFQV  | 419.44   | 9  | 15.8092  |
| Se132 | TMEM8A V123I    | HLA-C*03:04 | MT | TSFPDDTA[I]  | 450.27 | WT | TSFPDDTA[V]  | 425.27   | 9  | 15.8092  |
| Se132 | COG7 R470K      | HLA-C*03:04 | MT | TAFQNSI[K]I  | 205.84 | WT | TAFQNSI[R]I  | 124.14   | 9  | 10.17545 |
| Se132 | COG7 R470K      | HLA-C*03:04 | MT | TAFQNSI[K]II | 320.82 | WT | TAFQNSI[R]II | 138.8    | 10 | 10.17545 |
| Se132 | COG7 R470K      | HLA-A*02:06 | MT | FQNSI[K]IIAT | 338.1  | WT | FQNSI[R]IIAT | 228.71   | 10 | 10.17545 |
| Se132 | COG7 R470K      | HLA-A*02:06 | MT | FQNSI[K]IIA  | 459.53 | WT | FQNSI[R]IIA  | 229.85   | 9  | 10.17545 |
| Se132 | CMTR2 L708F     | HLA-A*02:06 | MT | YLQSVNE[F]L  | 16.76  | WT | YLQSVNE[L]L  | 34.35    | 9  | 5.87632  |
| Se132 | CMTR2 L708F     | HLA-A*02:06 | MT | SVNE[F]LSTL  | 63.86  | WT | SVNE[L]LSTL  | 133.75   | 9  | 5.87632  |
| Se132 | CMTR2 L708F     | HLA-C*03:04 | MT | SVNE[F]LSTL  | 84.02  | WT | SVNE[L]LSTL  | 106.9    | 9  | 5.87632  |
| Se132 | CMTR2 L708F     | HLA-A*02:06 | MT | SVNE[F]LSTLL | 90.38  | WT | SVNE[L]LSTLL | 158.73   | 10 | 5.87632  |
| Se132 | CMTR2 L708F     | HLA-C*03:04 | MT | SVNE[F]LSTLL | 253.52 | WT | SVNE[L]LSTLL | 298.72   | 10 | 5.87632  |
| Se132 | CMTR2 L708F     | HLA-C*03:04 | MT | QSVNE[F]LSTL | 279.24 | WT | QSVNE[L]LSTL | 429.55   | 10 | 5.87632  |
| Se132 | TP53 C3W        | HLA-A*02:06 | MT | [W]QLAKTCPV  | 4.8    | WT | [C]QLAKTCPV  | 13.48    | 9  | 26.91538 |
| Se132 | FAM83G G665V    | HLA-A*02:06 | MT | GTFVGPQG[V]  | 303.75 | WT | GTFVGPQG[G]  | 26212.43 | 9  | 1.96197  |
| Se132 | PIGW E21K       | HLA-A*02:06 | MT | [K]ITQGLCFPA | 119.54 | WT | [E]ITQGLCFPA | 1536.17  | 10 | 7.19426  |
| Se132 | PIGW E21K       | HLA-A*02:06 | MT | TVL[K]ITQGL  | 430.49 | WT | TVL[E]ITQGL  | 70.94    | 9  | 7.19426  |
| Se132 | MIF4GD P128L    | HLA-A*02:06 | MT | [L]VYDCLFRL  | 21.73  | WT | [P]VYDCLFRL  | 619.62   | 9  | 12.66511 |
| Se132 | MIF4GD P128L    | HLA-A*02:06 | MT | [L]VYDCLFRLA | 62.11  | WT | [P]VYDCLFRLA | 1489.41  | 10 | 12.66511 |
| Se132 | MIF4GD P128L    | HLA-A*02:06 | MT | PMMALVN[L]V  | 139.76 | WT | PMMALVN[P]V  | 42.83    | 9  | 12.66511 |
| Se132 | MIF4GD P128L    | HLA-C*03:04 | MT | MPMMALVN[L]  | 167.5  | WT | MPMMALVN[P]  | 24718.39 | 9  | 12.66511 |
| Se132 | MIF4GD P128L    | HLA-A*02:06 | MT | N[L]VYDCLFRL | 171.4  | WT | N[P]VYDCLFRL | 10151.84 | 10 | 12.66511 |
| Se132 | MIF4GD P128L    | HLA-A*02:06 | MT | ALVN[L]VYDCL | 406.6  | WT | ALVN[P]VYDCL | 516.76   | 10 | 12.66511 |
| Se132 | LDLR A603T      | HLA-C*03:04 | MT | IVTMSHQ[T]L  | 94.79  | WT | IVTMSHQ[A]L  | 73.21    | 9  | 4.77338  |
| Se132 | NCCRP1 G238R    | HLA-A*02:06 | MT | HVFRHY[R]PGV | 40.07  | WT | HVFRHY[G]PGV | 25.16    | 10 | 1.17861  |
| Se132 | C20orf194 V215I | HLA-C*03:04 | MT | N[I]YSKMDPM  | 307.1  | WT | N[V]YSKMDPM  | 118.85   | 9  | 1.51121  |
| Se132 | C20orf194 V215I | HLA-A*02:06 | MT | N[I]YSKMDPM  | 419.42 | WT | N[V]YSKMDPM  | 320.59   | 9  | 1.51121  |
| Se132 | C20orf24 D37H   | HLA-C*03:04 | MT | AAWE[H]KDEF  | 358.57 | WT | AAWE[D]KDEF  | 1057.1   | 9  | 56.10884 |
| Se132 | NDRG3 L272F     | HLA-A*02:06 | MT | RLNPINTT[F]L | 221.87 | WT | RLNPINTT[L]L | 337.77   | 10 | 12.67909 |
| Se132 | USP16 P586A     | HLA-C*03:04 | MT | H[A]DEINIEIL | 158.92 | WT | H[P]DEINIEIL | 2659.24  | 10 | 29.94486 |
| Se132 | USP16 P586A     | HLA-C*08:22 | MT | H[A]DEINIEIL | 261.23 | WT | H[P]DEINIEIL | 2583.77  | 10 | 29.94486 |
| Se132 | USP16 P586A     | HLA-C*03:04 | MT | H[A]DEINIEI  | 303.26 | WT | H[P]DEINIEI  | 3989.16  | 9  | 29.94486 |
| Se132 | USP16 P586A     | HLA-C*08:22 | MT | H[A]DEINIEI  | 323.48 | WT | H[P]DEINIEI  | 2957.61  | 9  | 29.94486 |
| Se132 | DOPEY2 E1559Q   | HLA-A*02:06 | MT | KQYES[Q]SVKL | 46.48  | WT | KQYES[E]SVKL | 67.56    | 10 | 8.77853  |
| Se132 | HLCS I648V      | HLA-A*02:06 | MT | RVVTVLEKL[V] | 279.91 | WT | RVVTVLEKL[I] | 912.55   | 10 | 8.79614  |
| Se132 | NUP62CL T24M    | HLA-C*03:04 | MT | TS[M]TTTATF  | 68.47  | WT | TS[T]TTTATF  | 769.74   | 9  | 1.59485  |
| Se132 | NUP62CL T24M    | HLA-A*02:06 | MT | FTTS[M]TTTA  | 169.18 | WT | FTTS[T]TTTA  | 291.3    | 9  | 1.59485  |
| Se132 | NUP62CL T24M    | HLA-C*03:04 | MT | TTS[M]TTTATF | 321.03 | WT | TTS[T]TTTATF | 361.21   | 10 | 1.59485  |
| Se132 | NUP62CL T24M    | HLA-C*03:04 | MT | IGLSFTTS[M]  | 366.74 | WT | IGLSFTTS[T]  | 21690.79 | 9  | 1.59485  |
| Se133 | NAV1 R284W      | HLA-A*02:06 | MT | IQYRSLP[W]PA | 10.48  | WT | IQYRSLP[R]PA | 148.08   | 10 | 3.05401  |
| Se133 | TRAPPC12 G342S  | HLA-A*33:03 | MT | ENLTMP[S]JLR | 62.95  | WT | ENLTMP[G]JLR | 138.58   | 9  | 8.90061  |
| Se133 | TRAPPC12 G342S  | HLA-B*51:01 | MT | MP[S]JLRFDNI | 144.08 | WT | MP[G]JLRFDNI | 338.04   | 9  | 8.90061  |
| Se133 | SMC6 S1068F     | HLA-A*33:03 | MT | ILRM[F]DPER  | 139.01 | WT | ILRM[S]DPER  | 639.93   | 9  | 6.75265  |
| Se133 | SMC6 S1068F     | HLA-A*33:03 | MT | RILRM[F]DPER | 356.61 | WT | RILRM[S]DPER | 1303.65  | 10 | 6.75265  |
| Se133 | CRIM1 D158H     | HLA-A*02:06 | MT | SQ[H]MCLSAL  | 87.93  | WT | SQ[D]MCLSAL  | 134.57   | 9  | 10.41973 |
| Se133 | CRIM1 D158H     | HLA-C*14:02 | MT | SQ[H]MCLSAL  | 92.75  | WT | SQ[D]MCLSAL  | 989.65   | 9  | 10.41973 |
| Se133 | CRIM1 D158H     | HLA-A*33:03 | MT | [H]MCLSALKR  | 182.08 | WT | [D]MCLSALKR  | 176.14   | 9  | 10.41973 |
| Se133 | DNAH1 R4096H    | HLA-A*02:06 | MT | WVMDLLQ[H]L  | 6.81   | WT | WVMDLLQ[R]L  | 13.95    | 9  | 1.19002  |
| Se133 | DNAH1 R4096H    | HLA-C*14:02 | MT | WVMDLLQ[H]L  | 349.62 | WT | WVMDLLQ[R]L  | 294.52   | 9  | 1.19002  |
| Se133 | SIPA1 R1007Q    | HLA-A*33:03 | MT | EV[Q]SLRHNNR | 20.11  | WT | EV[R]SLRHNNR | 14.66    | 10 | 9.3339   |
| Se133 | SIPA1 R1007Q    | HLA-A*33:03 | MT | [Q]SLRHNNRR  | 208.85 | WT | [R]SLRHNNRR  | 383.35   | 9  | 9.3339   |
| Se133 | SIPA1 R1007Q    | HLA-A*02:06 | MT | ALEEEV[Q]SL  | 473.69 | WT | ALEEEV[R]SL  | 2614.15  | 9  | 9.3339   |
| Se133 | CTAGE5 K236M    | HLA-A*33:03 | MT | ESHI[M]TLTER | 121.66 | WT | ESHI[K]TLTER | 147.95   | 10 | 6.40365  |
| Se133 | CTAGE5 K236M    | HLA-A*02:06 | MT | HI[M]TLTERL  | 447.62 | WT | HI[K]TLTERL  | 9651.19  | 9  | 6.40365  |

|       |                 |             |    |               |        |    |               |          |    |          |
|-------|-----------------|-------------|----|---------------|--------|----|---------------|----------|----|----------|
| Se133 | CTAGE5 K236M    | HLA-A*33:03 | MT | [M]TLTERLLK   | 485.7  | WT | [K]TLTERLLK   | 9327.49  | 9  | 6.40365  |
| Se133 | EMC8 E97K       | HLA-C*14:02 | MT | GYQQAN[K]RV   | 386.76 | WT | GYQQAN[E]RV   | 240.24   | 9  | 14.49172 |
| Se133 | TP53 R141C      | HLA-A*33:03 | MT | EV[C]VCACPGR  | 94.8   | WT | EV[R]VCACPGR  | 62.63    | 10 | 45.27501 |
| Se133 | MAN2B1 R190H    | HLA-C*14:02 | MT | [H]VAWHIDPF   | 156.5  | WT | [R]VAWHIDPF   | 114.72   | 9  | 33.18469 |
| Se133 | MAN2B1 R190H    | HLA-B*15:18 | MT | [H]VAWHIDPF   | 179.89 | WT | [R]VAWHIDPF   | 1403.78  | 9  | 33.18469 |
| Se133 | MAN2B1 R190H    | HLA-A*02:06 | MT | [H]VAWHIDPF   | 472.27 | WT | [R]VAWHIDPF   | 392.82   | 9  | 33.18469 |
| Se133 | COLGALT1 R453W  | HLA-A*02:06 | MT | RLMNL[M]W]DV  | 5.45   | WT | RLMNL[M]R]DV  | 194.53   | 9  | 26.34678 |
| Se133 | COLGALT1 R453W  | HLA-A*33:03 | MT | MNL[M]W]DVER  | 23.21  | WT | MNL[M]R]DVER  | 27.84    | 9  | 26.34678 |
| Se133 | COLGALT1 R453W  | HLA-A*02:06 | MT | LM[W]DVEREGL  | 83.72  | WT | LM[R]DVEREGL  | 3253.87  | 10 | 26.34678 |
| Se133 | COLGALT1 R453W  | HLA-A*33:03 | MT | LMNL[M]W]DVER | 119.9  | WT | LMNL[M]R]DVER | 105.31   | 10 | 26.34678 |
| Se133 | RALGAPA2 V691M  | HLA-A*02:06 | MT | TT[M]GRSFSL   | 24.94  | WT | TT[V]GRSFSL   | 107.1    | 9  | 6.79981  |
| Se133 | RALGAPA2 V691M  | HLA-A*33:03 | MT | [M]GRSFSLSWR  | 63.76  | WT | [V]GRSFSLSWR  | 1007.09  | 10 | 6.79981  |
| Se133 | RALGAPA2 V691M  | HLA-C*14:02 | MT | TT[M]GRSFSL   | 131.6  | WT | TT[V]GRSFSL   | 796.96   | 9  | 6.79981  |
| Se134 | ATP1A2 Q703H    | HLA-A*31:01 | MT | KLIIVEGC[H]R  | 99.56  | WT | KLIIVEGC[Q]R  | 147.29   | 10 | 2.51974  |
| Se134 | ATP1A2 V924M    | HLA-C*03:03 | MT | TAFFASI[M]VV  | 57.71  | WT | TAFFASI[V]VV  | 62.33    | 10 | 2.51974  |
| Se134 | ATP1A2 V924M    | HLA-C*03:03 | MT | TAFFASI[M]V   | 134.85 | WT | TAFFASI[V]V   | 51.94    | 9  | 2.51974  |
| Se134 | ATP1A2 V924M    | HLA-A*24:02 | MT | FFASI[M]VVQW  | 137.82 | WT | FFASI[V]VVQW  | 144.28   | 10 | 2.51974  |
| Se134 | ATP1A2 V924M    | HLA-C*03:03 | MT | HTAFFASI[M]V  | 267.54 | WT | HTAFFASI[V]V  | 1211.15  | 9  | 2.51974  |
| Se134 | ATP1A2 V924M    | HLA-C*03:03 | MT | [M]VVQWADLII  | 411.22 | WT | [V]VVQWADLII  | 1935.43  | 10 | 2.51974  |
| Se134 | ATP1A2 V924M    | HLA-C*14:03 | MT | AFFASI[M]VV   | 467.72 | WT | AFFASI[V]VV   | 794.55   | 9  | 2.51974  |
| Se134 | CDC73 G22A      | HLA-C*03:03 | MT | K[A]DEVIFGEF  | 271.06 | WT | K[G]DEVIFGEF  | 6965.31  | 10 | 13.42867 |
| Se134 | CDC73 G22A      | HLA-B*40:01 | MT | KEIVVK[A]DEV  | 283.54 | WT | KEIVVK[G]DEV  | 358.25   | 10 | 13.42867 |
| Se134 | RBKS C241F      | HLA-C*03:03 | MT | LGAEG[C]VVL   | 194.9  | WT | LGAEG[V]VVL   | 398.05   | 9  | 4.12282  |
| Se134 | SNRNP200 Q1568P | HLA-A*31:01 | MT | FVPSRK[P]TR   | 91.86  | WT | FVPSRK[Q]TR   | 150.65   | 10 | 48.82386 |
| Se134 | SNRNP200 Q1568P | HLA-C*14:03 | MT | FVPSRK[P]TRL  | 207.32 | WT | FVPSRK[Q]TRL  | 311.29   | 10 | 48.82386 |
| Se134 | SNRNP200 Q1568P | HLA-C*03:03 | MT | FVPSRK[P]TRL  | 258.76 | WT | FVPSRK[Q]TRL  | 393.4    | 10 | 48.82386 |
| Se134 | PMS1 L561P      | HLA-C*14:03 | MT | LRFPD[M]PJM   | 307.6  | WT | LRFPD[L]JM    | 751.28   | 9  | 6.43045  |
| Se134 | VGLL3 K44M      | HLA-A*31:01 | MT | QQK[M]LAVFSK  | 262.45 | WT | QQK[K]LAVFSK  | 327.17   | 10 | 4.15448  |
| Se134 | EPHB3 P400R     | HLA-B*40:01 | MT | VEFV[R]RQLGL  | 211.67 | WT | VEFV[P]RQLGL  | 68.2     | 10 | 16.5888  |
| Se134 | TBC1D19 D77N    | HLA-B*40:01 | MT | NEMGT[N]EPDL  | 51.87  | WT | NEMGT[D]EPDL  | 84.47    | 10 | 2.35842  |
| Se134 | TBC1D19 D77N    | HLA-C*03:03 | MT | GT[N]EPDLSL   | 316.35 | WT | GT[D]EPDLSL   | 886.82   | 9  | 2.35842  |
| Se134 | PCDHGB6 S475R   | HLA-C*03:03 | MT | [R]ASDPDLGL   | 91.94  | WT | [S]ASDPDLGL   | 53.39    | 9  | 15.56633 |
| Se134 | FAT2 Q1520R     | HLA-C*14:03 | MT | SGPS[R]HTLTV  | 303.65 | WT | SGPS[Q]HTLTV  | 574.18   | 10 | 3.21029  |
| Se134 | RREB1 V1284L    | HLA-B*40:01 | MT | AETAAAAGE[L]  | 9.24   | WT | AETAAAAGE[V]  | 56.61    | 10 | 7.27725  |
| Se134 | RREB1 V1284L    | HLA-C*03:03 | MT | TAAAAGE[L]L   | 108.16 | WT | TAAAAGE[V]L   | 31.7     | 9  | 7.27725  |
| Se134 | RREB1 V1284L    | HLA-C*03:03 | MT | AAAAGE[L]LDL  | 270.07 | WT | AAAAGE[V]LDL  | 194.69   | 10 | 7.27725  |
| Se134 | RREB1 V1284L    | HLA-B*44:03 | MT | AETAAAAGE[L]  | 365.43 | WT | AETAAAAGE[V]  | 549.46   | 10 | 7.27725  |
| Se134 | FAM160B2 G439R  | HLA-A*31:01 | MT | HTLYAHLI[R]   | 36.78  | WT | HTLYAHLI[G]   | 16552.8  | 9  | 6.82937  |
| Se134 | HNRNPK G248V    | HLA-A*31:01 | MT | R[V]RPVGFPMR  | 7.26   | WT | R[G]RPVGFPMR  | 20.43    | 10 | 227.9496 |
| Se134 | HNRNPK G248V    | HLA-A*31:01 | MT | MMFDDRR[V]R   | 17.32  | WT | MMFDDRR[G]R   | 15.13    | 9  | 227.9496 |
| Se134 | HNRNPK G248V    | HLA-A*31:01 | MT | TMMFDDRR[V]R  | 81.29  | WT | TMMFDDRR[G]R  | 77.8     | 10 | 227.9496 |
| Se134 | HNRNPK G248V    | HLA-C*14:03 | MT | R[V]RPVGFPM   | 250.01 | WT | R[G]RPVGFPM   | 327.72   | 9  | 227.9496 |
| Se134 | HNRNPK G248V    | HLA-C*03:03 | MT | R[V]RPVGFPM   | 299.25 | WT | R[G]RPVGFPM   | 1662.92  | 9  | 227.9496 |
| Se134 | HNRNPK G248V    | HLA-A*31:01 | MT | R[V]RPVGFPM   | 308.41 | WT | R[G]RPVGFPM   | 2830.38  | 9  | 227.9496 |
| Se134 | HNRNPK G248V    | HLA-C*14:03 | MT | MFDDRR[V]RPV  | 384.37 | WT | MFDDRR[G]RPV  | 506.24   | 10 | 227.9496 |
| Se134 | ENG F290L       | HLA-C*14:03 | MT | IFPEKNIRG[L]  | 130.61 | WT | IFPEKNIRG[F]  | 195.88   | 10 | 46.52133 |
| Se134 | FAM208B R2080T  | HLA-A*31:01 | MT | HNRDL[T]NSQR  | 449    | WT | HNRDL[R]NSQR  | 388.79   | 10 | 6.79684  |
| Se134 | ITGA8 V718M     | HLA-C*03:03 | MT | M[M]SGTNYSL   | 139.51 | WT | M[V]SGTNYSL   | 77.54    | 9  | 1.11409  |
| Se134 | ITGA8 V718M     | HLA-C*14:03 | MT | M[M]SGTNYSL   | 185.87 | WT | M[V]SGTNYSL   | 692.58   | 9  | 1.11409  |
| Se134 | LRRC20 F59V     | HLA-C*03:03 | MT | KAIDLSRNQ[V]  | 393.85 | WT | KAIDLSRNQ[F]  | 147.13   | 10 | 3.98476  |
| Se134 | HARB11 P194L    | HLA-B*40:01 | MT | VETNW[L]GSL   | 48     | WT | VETNW[P]GSL   | 84.23    | 9  | 2.04064  |
| Se134 | EHBPI1 I62N     | HLA-C*14:03 | MT | SWQPG[I]QNPNY | 336.65 | WT | SWQPG[V]QNPNY | 296.53   | 10 | 10.96825 |
| Se134 | SPTBN2 F1913L   | HLA-A*31:01 | MT | KFRF[F]KAVR   | 19.71  | WT | KFRF[V]KAVR   | 9.04     | 9  | 7.77639  |
| Se134 | SPTBN2 F1913L   | HLA-C*14:03 | MT | RF[L]KAVREL   | 33.94  | WT | RF[F]KAVREL   | 14.57    | 9  | 7.77639  |
| Se134 | SPTBN2 F1913L   | HLA-C*14:03 | MT | FR[F]KAVREL   | 47.55  | WT | FR[V]KAVREL   | 32.08    | 10 | 7.77639  |
| Se134 | SPTBN2 F1913L   | HLA-C*14:03 | MT | RF[L]KAVRELM  | 130.72 | WT | RF[F]KAVRELM  | 40.54    | 10 | 7.77639  |
| Se134 | SPTBN2 F1913L   | HLA-C*14:03 | MT | F[L]KAVRELM   | 300.66 | WT | F[F]KAVRELM   | 57.55    | 9  | 7.77639  |
| Se134 | SPTBN2 F1913L   | HLA-A*31:01 | MT | TTDKFRF[L]K   | 482.78 | WT | TTDKFRF[F]K   | 187.24   | 9  | 7.77639  |
| Se134 | SLC38A2 Q36L    | HLA-B*40:01 | MT | NEGGSLLYE[L]  | 87.53  | WT | NEGGSLLYE[Q]  | 20025.8  | 10 | 81.07635 |
| Se134 | SLC38A2 Q36L    | HLA-B*40:01 | MT | YE[L]JLGYKAF  | 88.17  | WT | YE[Q]JLGYKAF  | 96.64    | 9  | 81.07635 |
| Se134 | SLC38A2 Q36L    | HLA-C*14:03 | MT | LYE[L]JLGYKAF | 210.68 | WT | LYE[Q]JLGYKAF | 127.12   | 10 | 81.07635 |
| Se134 | SLC38A2 Q36L    | HLA-A*24:02 | MT | LYE[L]JLGYKAF | 232.62 | WT | LYE[Q]JLGYKAF | 168.46   | 10 | 81.07635 |
| Se134 | SLC38A2 Q36L    | HLA-B*44:03 | MT | YE[L]JLGYKAF  | 247.27 | WT | YE[Q]JLGYKAF  | 400.9    | 9  | 81.07635 |
| Se134 | DDX23 E334Q     | HLA-A*31:01 | MT | K[Q]QEEARLR   | 338.95 | WT | K[E]QEEARLR   | 12832.45 | 9  | 38.39994 |
| Se134 | TMEM263 G92R    | HLA-C*03:03 | MT | SAVA[R]GVTAV  | 17.31  | WT | SAVA[G]GVTAV  | 12.13    | 10 | 21.54883 |
| Se134 | TMEM263 G92R    | HLA-C*03:03 | MT | AVA[R]GVTAV   | 256.38 | WT | AVA[G]GVTAV   | 141.54   | 9  | 21.54883 |
| Se134 | TMEM263 G92R    | HLA-A*31:01 | MT | KGVSVAVA[R]   | 396.11 | WT | KGVSVAVA[G]   | 40074.36 | 9  | 21.54883 |
| Se134 | TMEM263 G92R    | HLA-C*03:03 | MT | SAVA[R]GVTAV  | 423.95 | WT | SAVA[G]GVTAV  | 237.71   | 9  | 21.54883 |
| Se134 | RALGAPA1 G1583R | HLA-B*40:01 | MT | SEENMPGG[R]L  | 175.4  | WT | SEENMPGG[G]L  | 125.32   | 10 | 4.70237  |
| Se134 | DDHD1 P663A     | HLA-C*14:03 | MT | IFHPTD[A]VAY  | 103.53 | WT | IFHPTD[P]VAY  | 99.74    | 10 | 1.66338  |
| Se134 | DDHD1 P663A     | HLA-C*03:03 | MT | [A]VAYRLEPL   | 268.04 | WT | [P]VAYRLEPL   | 7412.88  | 9  | 1.66338  |
| Se134 | DDHD1 P663A     | HLA-C*03:03 | MT | D[A]VAYRLEPL  | 463.93 | WT | D[P]VAYRLEPL  | 6631.84  | 10 | 1.66338  |
| Se134 | RTN1 R513W      | HLA-A*31:01 | MT | RAEERAPS[W]R  | 242.48 | WT | RAEERAPS[R]R  | 426.93   | 10 | 4.1432   |
| Se134 | BRF1 E131Q      | HLA-B*40:01 | MT | GEEDTEDE[Q]L  | 181.68 | WT | GEEDTEDE[E]L  | 203.4    | 10 | 6.13838  |
| Se134 | TBC1D24 L325V   | HLA-A*31:01 | MT | KQKSVS[V]JSKR | 13.34  | WT | KQKSVS[L]JSKR | 15.24    | 10 | 2.49551  |
| Se134 | TBC1D24 L325V   | HLA-A*31:01 | MT | KQKSVS[V]JSK  | 55.31  | WT | KQKSVS[L]JSK  | 164.97   | 9  | 2.49551  |
| Se134 | IGSF6 A121V     | HLA-A*31:01 | MT | I[V]FPSVPEAR  | 27.74  | WT | I[A]FPSVPEAR  | 57.94    | 10 | 2.3442   |
| Se134 | IGSF6 A121V     | HLA-C*03:03 | MT | SAIYICG[V]F   | 130.59 | WT | SAIYICG[A]F   | 86.3     | 10 | 2.3442   |

|       |                |             |    |               |        |    |               |          |    |           |
|-------|----------------|-------------|----|---------------|--------|----|---------------|----------|----|-----------|
| Se134 | TP53 R148S     | HLA-A*31:01 | MT | RVCACPG[S]DR  | 59.51  | WT | RVCACPG[R]DR  | 96.27    | 10 | 26.19535  |
| Se134 | MAP2K7 V180M   | HLA-C*03:03 | MT | YI[M]QCFGTF   | 47.98  | WT | YI[V]QCFGTF   | 154.92   | 9  | 9.77544   |
| Se134 | MAP2K7 V180M   | HLA-A*24:02 | MT | PYI[M]QCFGTF  | 48.8   | WT | PYI[V]QCFGTF  | 54.61    | 10 | 9.77544   |
| Se134 | MAP2K7 V180M   | HLA-C*14:03 | MT | YI[M]QCFGTF   | 72.11  | WT | YI[V]QCFGTF   | 389.2    | 9  | 9.77544   |
| Se134 | MAP2K7 V180M   | HLA-A*24:02 | MT | YI[M]QCFGTF   | 133.51 | WT | YI[V]QCFGTF   | 835.07   | 9  | 9.77544   |
| Se134 | MAP2K7 V180M   | HLA-C*03:03 | MT | YI[M]QCFGTFI  | 235.4  | WT | YI[V]QCFGTFI  | 801.58   | 10 | 9.77544   |
| Se134 | MICAL3 W1001L  | HLA-A*31:01 | MT | TSLFG[L]VAR   | 45.15  | WT | TSLFG[W]VAR   | 29.07    | 9  | 7.40165   |
| Se134 | MICAL3 W1001L  | HLA-C*03:03 | MT | FG[L]VARHSL   | 64.93  | WT | FG[W]VARHSL   | 53.76    | 9  | 7.40165   |
| Se134 | MICAL3 W1001L  | HLA-A*31:01 | MT | LTSLFG[L]VAR  | 108.37 | WT | LTSLFG[W]VAR  | 41.66    | 10 | 7.40165   |
| Se134 | MICAL3 W1001L  | HLA-C*14:03 | MT | FG[L]VARHSL   | 154.02 | WT | FG[W]VARHSL   | 82.36    | 9  | 7.40165   |
| Se134 | MICAL3 W1001L  | HLA-C*03:03 | MT | [L]VARHSLGL   | 215.71 | WT | [W]VARHSLGL   | 106.46   | 9  | 7.40165   |
| Se135 | VPS13D T1011S  | HLA-A*24:02 | MT | [S]YGADFDLL   | 101.17 | WT | [T]YGADFDLL   | 135.84   | 9  | 5.59769   |
| Se135 | VPS13D T1011S  | HLA-A*24:02 | MT | [S]YGADFDLLM  | 321.81 | WT | [T]YGADFDLLM  | 392.34   | 10 | 5.59769   |
| Se135 | VPS13D T1011S  | HLA-C*12:02 | MT | LLVDTMQ[S]Y   | 485.91 | WT | LLVDTMQ[T]Y   | 471.92   | 9  | 5.59769   |
| Se135 | B4GALT3 A133T  | HLA-C*12:02 | MT | R[T]REHHLRL   | 436.77 | WT | R[A]REHHLRL   | 314.7    | 10 | 35.86506  |
| Se135 | NBAS S1994F    | HLA-A*24:02 | MT | KYSHLYDL[F]   | 5.28   | WT | KYSHLYDL[S]   | 3180.43  | 9  | 7.95649   |
| Se135 | NAGK G38R      | HLA-C*12:02 | MT | [R]TSSDGSSSM  | 189.44 | WT | [G]TSSDGSSSM  | 741.66   | 10 | 17.32625  |
| Se135 | SCRN3 N410K    | HLA-A*24:02 | MT | IYQS[K]LSVKV  | 202.36 | WT | IYQS[N]LSVKV  | 129.66   | 10 | 2.44747   |
| Se135 | DZIP3 R1000G   | HLA-C*12:02 | MT | SATGQP[G]APL  | 404.38 | WT | SATGQP[R]APL  | 375.52   | 10 | 4.92189   |
| Se135 | FGFR3 N191I    | HLA-A*24:02 | MT | SWLK[I]GREF   | 185    | WT | SWLK[N]GREF   | 396.09   | 9  | 1.57605   |
| Se135 | ALDH7A1 L26R   | HLA-C*12:02 | MT | [R]SMWRLPRAL  | 265.22 | WT | [L]SMWRLPRAL  | 198.99   | 10 | 11.42406  |
| Se135 | ALDH7A1 L26R   | HLA-C*12:02 | MT | LIPSPG[R]SM   | 393.08 | WT | LIPSPG[L]SM   | 378.92   | 9  | 11.42406  |
| Se135 | TMEM170B K2M   | HLA-C*12:02 | MT | M[M]AEGGDHSM  | 127.41 | WT | M[K]AEGGDHSM  | 2350.08  | 10 | 2.41472   |
| Se135 | PUS7 M403I     | HLA-A*24:02 | MT | SWTEV[I]DLI   | 330.56 | WT | SWTEV[M]DLI   | 433.69   | 9  | 11.08748  |
| Se135 | FAM171A1 A370V | HLA-C*12:02 | MT | LLFSRR[V]SEF  | 233.53 | WT | LLFSRR[A]SEF  | 273.06   | 10 | 17.7163   |
| Se135 | FAM171A1 A370V | HLA-A*24:02 | MT | LFSRR[V]SEF   | 255.36 | WT | LFSRR[A]SEF   | 422.85   | 9  | 17.7163   |
| Se135 | FAM171A1 A370V | HLA-C*12:02 | MT | R[V]SEFFGPL   | 464.8  | WT | R[A]SEFFGPL   | 99.21    | 9  | 17.7163   |
| Se135 | LATS2 C400Y    | HLA-C*12:02 | MT | VAFRPD[Y]PV   | 194.08 | WT | VAFRPD[C]PV   | 203.39   | 9  | 2.90913   |
| Se135 | LATS2 C400Y    | HLA-C*12:02 | MT | [Y]PVPSTRNSF  | 271.33 | WT | [C]PVPSTRNSF  | 2707.54  | 10 | 2.90913   |
| Se135 | LATS2 C400Y    | HLA-C*12:02 | MT | HVAFRPD[Y]PV  | 318.33 | WT | HVAFRPD[C]PV  | 487.01   | 10 | 2.90913   |
| Se135 | RHBDF2 L721V   | HLA-C*12:02 | MT | F[V]NLSAIVL   | 95.41  | WT | F[L]NLSAIVL   | 422.11   | 9  | 4.31475   |
| Se135 | RHBDF2 L721V   | HLA-C*12:02 | MT | KAF[V]NLSAI   | 97.46  | WT | KAF[L]NLSAI   | 141.66   | 9  | 4.31475   |
| Se135 | RHBDF2 L721V   | HLA-C*12:02 | MT | F[V]NLSAIVLF  | 121.2  | WT | F[L]NLSAIVLF  | 566.04   | 10 | 4.31475   |
| Se135 | RHBDF2 L721V   | HLA-C*12:02 | MT | KAF[V]NLSAIV  | 161.99 | WT | KAF[L]NLSAIV  | 218.06   | 10 | 4.31475   |
| Se135 | CILP2 V513L    | HLA-C*12:02 | MT | YQGDFTIE[V]   | 202.2  | WT | YQGDFTIE[V]   | 127      | 9  | 1.32853   |
| Se135 | CILP2 V513L    | HLA-A*24:02 | MT | AYQGDFTIE[L]  | 367.13 | WT | AYQGDFTIE[V]  | 1008.54  | 10 | 1.32853   |
| Se135 | RYR1 K965N     | HLA-C*12:02 | MT | MSNGY[N]PAPL  | 83.59  | WT | MSNGY[K]PAPL  | 193.54   | 10 | 2.25118   |
| Se135 | RYR1 K965N     | HLA-C*12:02 | MT | YMMSNGY[N]PA  | 189.09 | WT | YMMSNGY[K]PA  | 428.62   | 10 | 2.25118   |
| Se135 | FKRP R154H     | HLA-C*12:02 | MT | SA[H]LVAAPV   | 77.31  | WT | SA[R]LVAAPV   | 251.13   | 9  | 4.97137   |
| Se135 | FKRP R154H     | HLA-C*12:02 | MT | GSA[H]LVAAPV  | 481.36 | WT | GSA[R]LVAAPV  | 1036.59  | 10 | 4.97137   |
| Se135 | IFNAR1 A406P   | HLA-C*12:02 | MT | YCVK[P]RAHTM  | 343.49 | WT | YCVK[A]RAHTM  | 456.81   | 10 | 20.29303  |
| Se135 | TIMM8A A9V     | HLA-C*12:02 | MT | SS[A]AGLGAV   | 276.3  | WT | SS[A]AGLGAV   | 226.84   | 9  | 7.20272   |
| Se135 | TIMM8A A9V     | HLA-C*12:02 | MT | SSSS[V]AGL    | 456.09 | WT | SSSS[A]AGL    | 679.29   | 9  | 7.20272   |
| Se135 | IL13RA2 G47D   | HLA-A*24:02 | MT | GYL[D]YLQLQW  | 17.65  | WT | GYL[G]YLQLQW  | 14.77    | 10 | 1.10031   |
| Se135 | DNASE1L1 P67A  | HLA-C*12:02 | MT | SAI[A]LLLLREL | 158.24 | WT | SAI[P]LLLLREL | 87.27    | 10 | 3.81272   |
| Se136 | STAT1 E500K    | HLA-A*11:01 | MT | CARWAQLS[K]   | 312.45 | WT | CARWAQLS[E]   | 26893.58 | 9  | 389.33043 |
| Se136 | LARS2 W455C    | HLA-A*24:02 | MT | RY[C]GTPIPI   | 71.04  | WT | RY[W]GTPIPI   | 19.46    | 9  | 14.49929  |
| Se136 | LARS2 W455C    | HLA-C*07:02 | MT | QRY[C]GTPIPI  | 482.26 | WT | QRY[W]GTPIPI  | 303.77   | 10 | 14.49929  |
| Se136 | CACNA1D R631K  | HLA-A*11:01 | MT | RLLRIFKV[T]K  | 87.97  | WT | RLLRIFKV[T]R  | 532.83   | 10 | 1.30735   |
| Se136 | CACNA1D R631K  | HLA-C*03:04 | MT | KVT[K]JHWTSL  | 346.05 | WT | KVT[R]JHWTSL  | 495.56   | 9  | 1.30735   |
| Se136 | ABCC10 T651I   | HLA-C*03:04 | MT | FA[I]JRDNIL   | 8.57   | WT | FA[T]JRDNIL   | 25.33    | 9  | 4.38913   |
| Se136 | ABCC10 T651I   | HLA-C*03:04 | MT | FA[I]JRDNILF  | 35.31  | WT | FA[T]JRDNILF  | 105.23   | 10 | 4.38913   |
| Se136 | ABCC10 T651I   | HLA-B*40:01 | MT | QEPWIQFA[I]   | 40.48  | WT | QEPWIQFA[T]   | 1785.47  | 9  | 4.38913   |
| Se136 | ABCC10 T651I   | HLA-A*11:01 | MT | [I]JRDNILFGK  | 116.48 | WT | [T]JRDNILFGK  | 58.02    | 10 | 4.38913   |
| Se136 | ABCC10 T651I   | HLA-B*40:01 | MT | QEPWIQFA[I]I  | 172.4  | WT | QEPWIQFA[T]I  | 143.05   | 10 | 4.38913   |
| Se136 | ABCC10 T651I   | HLA-B*67:01 | MT | FA[I]JRDNIL   | 328.43 | WT | FA[T]JRDNIL   | 535.86   | 9  | 4.38913   |
| Se136 | ABCC10 T651I   | HLA-B*67:01 | MT | EPWIQFA[I]I   | 366.71 | WT | EPWIQFA[T]I   | 201.77   | 9  | 4.38913   |
| Se136 | ESR1 L536P     | HLA-B*67:01 | MT | VP[P]YDLLLEM  | 247.55 | WT | VP[L]YDLLLEM  | 68.56    | 10 | 34.14984  |
| Se136 | ESR1 L536P     | HLA-B*67:01 | MT | P[P]YDLLLEM   | 261.21 | WT | P[L]YDLLLEM   | 16046.69 | 9  | 34.14984  |
| Se136 | CREB3L2 T506K  | HLA-A*11:01 | MT | VSAKLEGNE[K]  | 326.29 | WT | VSAKLEGNE[T]  | 35702.33 | 10 | 8.89206   |
| Se136 | OSBPL5 T465A   | HLA-A*11:01 | MT | TL[A]MPYAHCK  | 29.73  | WT | TL[T]MPYAHCK  | 59.18    | 10 | 3.64826   |
| Se136 | OSBPL5 T465A   | HLA-A*11:01 | MT | L[A]MPYAHCK   | 41.15  | WT | L[T]MPYAHCK   | 10.3     | 9  | 3.64826   |
| Se136 | OSBPL5 T465A   | HLA-C*03:04 | MT | RAEDYTL[A]M   | 43.05  | WT | RAEDYTL[T]M   | 47.58    | 9  | 3.64826   |
| Se136 | OSBPL5 T465A   | HLA-B*67:01 | MT | RAEDYTL[A]M   | 80.72  | WT | RAEDYTL[T]M   | 307.79   | 9  | 3.64826   |
| Se136 | ZDHHC13 V390D  | HLA-B*67:01 | MT | SPW[D]LYILML  | 17.8   | WT | SPW[V]LYILML  | 35.7     | 10 | 19.20753  |
| Se136 | ZDHHC13 V390D  | HLA-B*67:01 | MT | SPW[D]LYILM   | 37.35  | WT | SPW[V]LYILM   | 110.39   | 9  | 19.20753  |
| Se136 | ACOT1 T202M    | HLA-A*11:01 | MT | KTME[M]LHLEY  | 15.63  | WT | KTME[T]LHLEY  | 15.08    | 10 | 3.28366   |
| Se136 | ACOT1 T202M    | HLA-B*40:01 | MT | YEDLPKTM[E]M  | 100.41 | WT | YEDLPKTM[E]T  | 4340.99  | 10 | 3.28366   |
| Se136 | ACOT1 T202M    | HLA-B*40:01 | MT | ME[M]LHLEYF   | 110.21 | WT | ME[T]LHLEYF   | 446.89   | 9  | 3.28366   |
| Se136 | ACOT1 T202M    | HLA-B*67:01 | MT | LPKTM[E]M]LHL | 474.2  | WT | LPKTM[E]T]LHL | 345.53   | 10 | 3.28366   |
| Se136 | MAP2K3 T10I    | HLA-B*67:01 | MT | APNP[I]PPRNL  | 189.35 | WT | APNP[T]PPRNL  | 258.41   | 10 | 16.29261  |
| Se136 | MAP2K3 T10I    | HLA-C*03:04 | MT | MSKPPAPNP[I]  | 362.22 | WT | MSKPPAPNP[T]  | 10788.75 | 10 | 16.29261  |
| Se136 | ELF4 V247A     | HLA-A*11:01 | MT | KA[A]SKLWGK   | 49.31  | WT | KA[V]SKLWGK   | 74.21    | 9  | 22.81281  |
| Se136 | ELF4 V247A     | HLA-A*11:01 | MT | KLVDSKA[A]JSK | 126.05 | WT | KLVDSKA[V]JSK | 115.02   | 10 | 22.81281  |
| Se136 | ELF4 V247A     | HLA-A*11:01 | MT | LVDSKA[A]JSK  | 214.37 | WT | LVDSKA[V]JSK  | 146.04   | 9  | 22.81281  |
| Se137 | IPO13 V774F    | HLA-B*35:01 | MT | EALFLLVTS[F]  | 87.23  | WT | EALFLLVTS[V]  | 5126.26  | 10 | 16.63503  |
| Se137 | IPO13 V774F    | HLA-B*35:01 | MT | LVTS[F]TLTLF  | 149.75 | WT | LVTS[V]TLTLF  | 131.78   | 10 | 16.63503  |
| Se137 | IPO13 V774F    | HLA-B*35:01 | MT | LVTS[F]TLTL   | 384.22 | WT | LVTS[V]TLTL   | 285.95   | 9  | 16.63503  |

|       |                |             |    |                |        |    |               |          |    |          |
|-------|----------------|-------------|----|----------------|--------|----|---------------|----------|----|----------|
| Se137 | AGL R404T      | HLA-A*11:01 | MT | T[T]KHPLVTR    | 401.59 | WT | T[R]KHPLVTR   | 26182.68 | 9  | 8.53038  |
| Se137 | OTUD7B P78T    | HLA-A*11:01 | MT | R[T]PRPILQR    | 212.41 | WT | R[P]PRPILQR   | 15305.79 | 9  | 7.06476  |
| Se137 | CD84 N36T      | HLA-A*11:01 | MT | [T]VTLTCSVEK   | 83.09  | WT | [N]VTLTCSVEK  | 492.12   | 10 | 1.1358   |
| Se137 | CD84 N36T      | HLA-B*35:01 | MT | MASVNSTC[T]V   | 121.57 | WT | MASVNSTC[N]V  | 597.68   | 10 | 1.1358   |
| Se137 | OBSCN T4372I   | HLA-A*26:01 | MT | EVAAH[I]WLL    | 25.42  | WT | EVAAH[T]WLL   | 29.15    | 9  | 2.50196  |
| Se137 | PQLC3 V90L     | HLA-A*11:01 | MT | CIFHFNGN[L]K   | 14.68  | WT | CIFHFNGN[V]K  | 31.92    | 10 | 13.17029 |
| Se137 | LRP2 S608G     | HLA-B*35:01 | MT | IPHPFGV[G]LF   | 33.57  | WT | IPHPFGV[S]LF  | 15.31    | 10 | 7.1455   |
| Se137 | LRP2 S608G     | HLA-B*35:01 | MT | HPFGV[G]LFEG   | 178.61 | WT | HPFGV[S]LFEG  | 168.15   | 10 | 7.1455   |
| Se137 | LRP2 S608G     | HLA-B*35:01 | MT | IPHPFGV[G]JL   | 229.19 | WT | IPHPFGV[S]JL  | 45.96    | 9  | 7.1455   |
| Se137 | HOXD8 K14N     | HLA-B*54:01 | MT | NPLYSKY[N]AA   | 242.77 | WT | NPLYSKY[K]AA  | 802.18   | 10 | 5.51188  |
| Se137 | HOXD8 K14N     | HLA-B*35:01 | MT | [N]AAAAAAAA    | 333.81 | WT | [K]AAAAAAAA   | 2137.01  | 9  | 5.51188  |
| Se137 | HOXD8 K14N     | HLA-B*35:01 | MT | [N]AAAAAAAA    | 333.81 | WT | [K]AAAAAAAA   | 2137.01  | 10 | 5.51188  |
| Se137 | SLC25A38 Q236E | HLA-B*35:01 | MT | [E]PADVIKTHM   | 133.9  | WT | [Q]PADVIKTHM  | 150.92   | 10 | 29.32816 |
| Se137 | PRICKLE2 M236I | HLA-B*35:01 | MT | YI[I]KEGRPY    | 29.99  | WT | YI[M]KEGRPY   | 14.96    | 9  | 2.29329  |
| Se137 | PRICKLE2 M236I | HLA-A*26:01 | MT | YI[I]KEGRPY    | 126.67 | WT | YI[M]KEGRPY   | 276.06   | 9  | 2.29329  |
| Se137 | PRICKLE2 M236I | HLA-A*11:01 | MT | VLGGQRY[I]JK   | 392.31 | WT | VLGGQRY[M]JK  | 205.74   | 10 | 2.29329  |
| Se137 | TXK T196R      | HLA-A*11:01 | MT | SVFMGARRS[R]   | 136.57 | WT | SVFMGARRS[T]  | 17230.37 | 10 | 1.72629  |
| Se137 | PCDHA4 A731T   | HLA-B*35:01 | MT | LPTEG[T]CAPG   | 201.43 | WT | LPTEG[A]CAPG  | 241.01   | 10 | 12.18177 |
| Se137 | RGL2 D361N     | HLA-A*11:01 | MT | LVML[N]AASK    | 31.96  | WT | LVML[D]AASK   | 40.82    | 9  | 17.31488 |
| Se137 | WDR60 S758L    | HLA-B*35:01 | MT | FSTDGILT[L]    | 368.32 | WT | FSTDGILT[S]   | 5212.26  | 9  | 6.59643  |
| Se137 | SNAI2 S30Y     | HLA-B*35:01 | MT | [Y]PYLYESYSM   | 3.47   | WT | [S]PYLYESYSM  | 22.83    | 10 | 2.83785  |
| Se137 | SNAI2 S30Y     | HLA-A*26:01 | MT | DTHTVII[Y]PY   | 20.31  | WT | DTHTVII[S]PY  | 11.48    | 10 | 2.83785  |
| Se137 | SNAI2 S30Y     | HLA-B*35:01 | MT | TVIII[Y]PYLY   | 110.24 | WT | TVIII[S]PYLY  | 75.31    | 9  | 2.83785  |
| Se137 | SNAI2 S30Y     | HLA-B*35:01 | MT | DTHTVII[Y]PY   | 117.97 | WT | DTHTVII[S]PY  | 149.32   | 10 | 2.83785  |
| Se137 | SNAI2 S30Y     | HLA-B*54:01 | MT | [Y]PYLYESYSM   | 124.66 | WT | [S]PYLYESYSM  | 1451.68  | 10 | 2.83785  |
| Se137 | SNAI2 S30Y     | HLA-A*26:01 | MT | HTVII[Y]PYLY   | 146.84 | WT | HTVII[S]PYLY  | 165.02   | 10 | 2.83785  |
| Se137 | SNAI2 S30Y     | HLA-B*35:01 | MT | II[Y]PYLYESY   | 162.76 | WT | II[S]PYLYESY  | 204.95   | 10 | 2.83785  |
| Se137 | SNAI2 S30Y     | HLA-B*35:01 | MT | HTVII[Y]PYLY   | 176.27 | WT | HTVII[S]PYLY  | 92.4     | 10 | 2.83785  |
| Se137 | SNAI2 S30Y     | HLA-A*11:01 | MT | TVIII[Y]PYLY   | 192.38 | WT | TVIII[S]PYLY  | 154.88   | 9  | 2.83785  |
| Se137 | SNAI2 S30Y     | HLA-A*11:01 | MT | HTVII[Y]PYLY   | 254.76 | WT | HTVII[S]PYLY  | 217.78   | 10 | 2.83785  |
| Se137 | SNAI2 S30Y     | HLA-A*26:01 | MT | TVIII[Y]PYLY   | 384.51 | WT | TVIII[S]PYLY  | 455.84   | 9  | 2.83785  |
| Se137 | SNAI2 S30Y     | HLA-B*35:01 | MT | ELDTHTVII[Y]   | 406.18 | WT | ELDTHTVII[S]  | 30115.37 | 10 | 2.83785  |
| Se137 | SNAI2 S30Y     | HLA-A*11:01 | MT | II[Y]PYLYESY   | 491.18 | WT | II[S]PYLYESY  | 1070.14  | 10 | 2.83785  |
| Se137 | TMEM67 V701A   | HLA-A*11:01 | MT | LFLE[A]VGFK    | 233.45 | WT | LFLE[V]VGFK   | 238.98   | 10 | 2.63392  |
| Se137 | KCNQ3 E5G      | HLA-B*35:01 | MT | KPA[G]HATMF    | 101.56 | WT | KPA[E]HATMF   | 43.51    | 9  | 1.0093   |
| Se137 | WISPI P163L    | HLA-B*35:01 | MT | TPCLRVRP[L]    | 212.36 | WT | TPCLRVRP[P]   | 10188.41 | 10 | 1.63459  |
| Se137 | ENG Y612S      | HLA-B*35:01 | MT | W[S]IYSHSTREY  | 22.68  | WT | W[Y]IYSHSTREY | 354.87   | 10 | 35.68533 |
| Se137 | ENG Y612S      | HLA-B*35:01 | MT | [S]IYSHSTREY   | 38.41  | WT | [Y]IYSHSTREY  | 4.87     | 9  | 35.68533 |
| Se137 | ENG Y612S      | HLA-B*35:01 | MT | LTAALW[S]IY    | 106.97 | WT | LTAALW[Y]IY   | 72.09    | 9  | 35.68533 |
| Se137 | ENG Y612S      | HLA-A*26:01 | MT | [S]IYSHSTREY   | 125.18 | WT | [Y]IYSHSTREY  | 34.01    | 9  | 35.68533 |
| Se137 | ENG Y612S      | HLA-A*26:01 | MT | LTAALW[S]IY    | 145.64 | WT | LTAALW[Y]IY   | 870.24   | 9  | 35.68533 |
| Se137 | ENG Y612S      | HLA-A*11:01 | MT | [S]IYSHSTREY   | 152.91 | WT | [Y]IYSHSTREY  | 581.67   | 9  | 35.68533 |
| Se137 | ENG Y612S      | HLA-A*11:01 | MT | ALW[S]IYSHTR   | 280.65 | WT | ALW[Y]IYSHTR  | 326.74   | 10 | 35.68533 |
| Se137 | ENG Y612S      | HLA-B*35:01 | MT | LLTAALW[S]IY   | 401.16 | WT | LLTAALW[Y]IY  | 509.08   | 10 | 35.68533 |
| Se137 | ENG Y612S      | HLA-A*26:01 | MT | W[S]IYSHSTREY  | 415.12 | WT | W[Y]IYSHSTREY | 3743.28  | 10 | 35.68533 |
| Se137 | ENG Y612S      | HLA-A*11:01 | MT | LTAALW[S]IY    | 445.73 | WT | LTAALW[Y]IY   | 310.41   | 9  | 35.68533 |
| Se137 | NAIF1 A42T     | HLA-B*35:01 | MT | VPL[T]AKSAAW   | 87.51  | WT | VPL[A]AKSAAW  | 49.71    | 10 | 2.74636  |
| Se137 | NAIF1 A42T     | HLA-B*54:01 | MT | VPL[T]AKSAA    | 450.58 | WT | VPL[A]AKSAA   | 247.93   | 9  | 2.74636  |
| Se137 | SETX R2340Q    | HLA-A*11:01 | MT | [Q]NIGIITHYK   | 240.25 | WT | [R]NIGIITHYK  | 75.94    | 10 | 11.88907 |
| Se137 | SETX R2340Q    | HLA-B*35:01 | MT | F[Q]NIGIITHY   | 296.99 | WT | F[R]NIGIITHY  | 4446.2   | 10 | 11.88907 |
| Se137 | RALGDS Y813C   | HLA-B*35:01 | MT | [C]AMNSTANY    | 9.76   | WT | [Y]AMNSTANY   | 2.39     | 9  | 20.80324 |
| Se137 | RALGDS Y813C   | HLA-B*35:01 | MT | F[C]AMNSTANY   | 52.57  | WT | F[Y]AMNSTANY  | 185.59   | 10 | 20.80324 |
| Se137 | RALGDS Y813C   | HLA-A*11:01 | MT | [C]AMNSTANY    | 386.29 | WT | [Y]AMNSTANY   | 575.49   | 9  | 20.80324 |
| Se137 | RALGDS Y813C   | HLA-A*26:01 | MT | ENANVF[C]AM    | 390.94 | WT | ENANVF[Y]AM   | 294.91   | 9  | 20.80324 |
| Se137 | PDZD8 R936M    | HLA-B*35:01 | MT | SVNKT[GLT]R[M] | 293.47 | WT | SVNKT[GLT]R   | 26359.42 | 10 | 20.89361 |
| Se137 | CNIH1 I29V     | HLA-B*35:01 | MT | FAIWHI[V]AF    | 3.04   | WT | FAIWHI[I]AF   | 2.66     | 9  | 23.23105 |
| Se137 | CNIH1 I29V     | HLA-A*11:01 | MT | HI[V]AFDELK    | 52.41  | WT | HI[I]AFDELK   | 34.37    | 9  | 23.23105 |
| Se137 | CNIH1 I29V     | HLA-B*35:01 | MT | [V]AFDELKTDY   | 72.42  | WT | [I]AFDELKTDY  | 37.21    | 10 | 23.23105 |
| Se137 | CNIH1 I29V     | HLA-B*35:01 | MT | FFAIWHI[V]AF   | 191.88 | WT | FFAIWHI[I]AF  | 161.62   | 10 | 23.23105 |
| Se137 | CNIH1 I29V     | HLA-A*26:01 | MT | FAIWHI[V]AF    | 246.42 | WT | FAIWHI[I]AF   | 206.79   | 9  | 23.23105 |
| Se137 | CNIH1 I29V     | HLA-B*54:01 | MT | FAIWHI[V]AF    | 351.3  | WT | FAIWHI[I]AF   | 414.29   | 9  | 23.23105 |
| Se137 | LOC81691 E560A | HLA-B*35:01 | MT | EAAQLA[I]EJSL  | 213.55 | WT | EAAQLA[I]EJSL | 588.46   | 10 | 1.66232  |
| Se137 | IRX5 A279S     | HLA-B*35:01 | MT | SPAGPA[S]ARL   | 453.64 | WT | SPAGPA[A]ARL  | 385.73   | 10 | 1.60446  |
| Se137 | NLRP1 A126V    | HLA-B*54:01 | MT | MPWIHELP[V]    | 6.7    | WT | MPWIHELP[A]   | 5.58     | 9  | 2.3262   |
| Se137 | NLRP1 A126V    | HLA-B*35:01 | MT | MPWIHELP[V]    | 12.76  | WT | MPWIHELP[A]   | 13.78    | 9  | 2.3262   |
| Se137 | NLRP1 A126V    | HLA-B*35:01 | MT | MPWIHELP[V]G   | 116.16 | WT | MPWIHELP[A]G  | 62.09    | 10 | 2.3262   |
| Se137 | COLEC12 T230K  | HLA-A*11:01 | MT | [K]SQAIQRIK    | 448.23 | WT | [T]SQAIQRIK   | 489.53   | 9  | 1.68222  |
| Se137 | IER2 N173K     | HLA-A*11:01 | MT | AQAEGAF[P]K    | 11.83  | WT | AQAEGAF[N]    | 23669.36 | 9  | 26.73577 |
| Se137 | PEPD S160N     | HLA-A*11:01 | MT | [N]LFEHYCYSR   | 484.32 | WT | [S]LFEHYCYSR  | 46.65    | 10 | 18.32067 |
| Se137 | ANGPT4 K102N   | HLA-A*11:01 | MT | LQNNTQWL[N]K   | 85.74  | WT | LQNNTQWL[K]K  | 130.3    | 10 | 19.2573  |
| Se137 | TNRC6B E637G   | HLA-A*26:01 | MT | DTVWDI[G]JEV   | 178.18 | WT | DTVWDI[E]JEV  | 704.69   | 9  | 3.5041   |
| Se137 | TNRC6B E637G   | HLA-A*11:01 | MT | TVWDI[G]JEVPR  | 215.92 | WT | TVWDI[E]JEVPR | 392.01   | 10 | 3.5041   |
| Se137 | BRWD3 W297R    | HLA-A*11:01 | MT | TICFWQ[R]HVK   | 63.28  | WT | TICFWQ[W]HVK  | 20.48    | 10 | 4.71745  |
| Se138 | UBE4B A234T    | HLA-A*33:03 | MT | TSQPIA[T]AAR   | 86.18  | WT | TSQPIA[A]AAR  | 81.57    | 10 | 18.37027 |
| Se138 | AGL K969I      | HLA-B*44:03 | MT | AEVG[I]WLQAM   | 41.28  | WT | AEVG[K]WLQAM  | 89.97    | 10 | 3.48616  |
| Se138 | AGL K969I      | HLA-A*24:02 | MT | [I]WLQAMFFYL   | 61.89  | WT | [K]WLQAMFFYL  | 34.17    | 10 | 3.48616  |
| Se138 | AGL K969I      | HLA-B*44:03 | MT | AEVG[I]WLQA    | 348.87 | WT | AEVG[K]WLQA   | 2219.45  | 9  | 3.48616  |
| Se138 | AGL K969I      | HLA-C*14:03 | MT | [I]WLQAMFFYL   | 383.74 | WT | [K]WLQAMFFYL  | 383.48   | 10 | 3.48616  |

|       |               |             |    |               |        |    |               |          |    |          |
|-------|---------------|-------------|----|---------------|--------|----|---------------|----------|----|----------|
| Se138 | ILDR2 C231Y   | HLA-A*24:02 | MT | C[Y]PQALYEA   | 241.65 | WT | C[C]PQALYEA   | 23144.63 | 9  | 1.00714  |
| Se138 | ILDR2 C231Y   | HLA-C*14:03 | MT | C[Y]PQALYEA   | 330.06 | WT | C[C]PQALYEA   | 19008.91 | 9  | 1.00714  |
| Se138 | ASPM H262L    | HLA-C*12:02 | MT | [L]SANVSKVSF  | 263.59 | WT | [H]SANVSKVSF  | 401.52   | 10 | 2.34326  |
| Se138 | ASPM H262L    | HLA-B*44:03 | MT | SENRELLNV[L]  | 334.33 | WT | SENRELLNV[H]  | 770.79   | 10 | 2.34326  |
| Se138 | AKT3 G231C    | HLA-B*44:03 | MT | MEYVNG[C]ELF  | 30.08  | WT | MEYVNG[G]ELF  | 34.04    | 10 | 5.43618  |
| Se138 | AKT3 G231C    | HLA-A*24:02 | MT | EYVNG[C]ELF   | 78.37  | WT | EYVNG[G]ELF   | 300.04   | 9  | 5.43618  |
| Se138 | AKT3 G231C    | HLA-A*24:02 | MT | EYVNG[C]ELFF  | 109.25 | WT | EYVNG[G]ELFF  | 241.09   | 10 | 5.43618  |
| Se138 | AKT3 G231C    | HLA-B*44:03 | MT | MEYVNG[C]EL   | 144.92 | WT | MEYVNG[G]EL   | 460.77   | 9  | 5.43618  |
| Se138 | SLC1A4 G59A   | HLA-C*12:02 | MT | L[A]AALRGLSL  | 128.04 | WT | L[G]AALRGLSL  | 2584.36  | 10 | 4.7911   |
| Se138 | SLC1A4 G59A   | HLA-C*14:03 | MT | [A]AALRGLSL   | 419.39 | WT | [G]AALRGLSL   | 1145.7   | 9  | 4.7911   |
| Se138 | SLC1A4 G59A   | HLA-C*12:02 | MT | [A]AALRGLSL   | 422.08 | WT | [G]AALRGLSL   | 1112.82  | 9  | 4.7911   |
| Se138 | SLC1A4 G59A   | HLA-C*14:03 | MT | L[A]AALRGLSL  | 466.82 | WT | L[G]AALRGLSL  | 1526.46  | 10 | 4.7911   |
| Se138 | NRP2 R428W    | HLA-C*12:02 | MT | [W]VTDAPCSNM  | 366.8  | WT | [R]VTDAPCSNM  | 531.7    | 10 | 3.92245  |
| Se138 | PASK C925Y    | HLA-C*14:03 | MT | F[Y]CWLVKDL   | 94.89  | WT | F[C]CWLVKDL   | 13738.27 | 9  | 2.86192  |
| Se138 | PASK C925Y    | HLA-C*14:03 | MT | F[Y]CWLVKDLL  | 111.98 | WT | F[C]CWLVKDLL  | 12619.65 | 10 | 2.86192  |
| Se138 | DBR1 S466C    | HLA-A*33:03 | MT | EFSASF[C]DVR  | 52.1   | WT | EFSASF[S]DVR  | 55.53    | 10 | 9.7554   |
| Se138 | DBR1 S466C    | HLA-B*44:03 | MT | SEFSASF[C]DV  | 210.71 | WT | SEFSASF[S]DV  | 268.55   | 10 | 9.7554   |
| Se138 | DBR1 S466C    | HLA-A*33:03 | MT | FSASF[C]DVR   | 233.58 | WT | FSASF[S]DVR   | 320.7    | 9  | 9.7554   |
| Se138 | DBR1 S466C    | HLA-C*12:02 | MT | FSASF[C]DVRI  | 329.51 | WT | FSASF[S]DVRI  | 176.02   | 10 | 9.7554   |
| Se138 | CEP70 D396E   | HLA-B*44:03 | MT | E[E]LQSHYKL   | 235.89 | WT | E[D]LQSHYKL   | 13932.49 | 10 | 8.96454  |
| Se138 | TNIK L915R    | HLA-A*33:03 | MT | AAALFTSEL[R]  | 249.03 | WT | AAALFTSEL[L]  | 28612.54 | 10 | 1.14445  |
| Se138 | EVC2 T1036S   | HLA-C*12:02 | MT | FA[S]LCSQEL   | 39.65  | WT | FA[T]LCSQEL   | 75.5     | 9  | 5.52584  |
| Se138 | EVC2 T1036S   | HLA-B*44:03 | MT | MEADTFA[S]L   | 79.36  | WT | MEADTFA[T]L   | 92.49    | 9  | 5.52584  |
| Se138 | EVC2 T1036S   | HLA-C*14:03 | MT | TFA[S]LCSQEL  | 90.46  | WT | TFA[T]LCSQEL  | 147.11   | 10 | 5.52584  |
| Se138 | EVC2 T1036S   | HLA-C*14:03 | MT | FA[S]LCSQEL   | 221.04 | WT | FA[T]LCSQEL   | 320.89   | 9  | 5.52584  |
| Se138 | EVC2 T1036S   | HLA-A*33:03 | MT | FA[S]LCSQELR  | 274.48 | WT | FA[T]LCSQELR  | 332.01   | 10 | 5.52584  |
| Se138 | MAN2B2 G345R  | HLA-C*14:03 | MT | YLWPAPR[R]JHL | 29.36  | WT | YLWPAPR[G]JHL | 72.23    | 10 | 20.77706 |
| Se138 | MAN2B2 G345R  | HLA-C*14:03 | MT | LWPAPR[R]JHL  | 112.9  | WT | LWPAPR[G]JHL  | 215.57   | 9  | 20.77706 |
| Se138 | MAN2B2 G345R  | HLA-C*12:02 | MT | YLWPAPR[R]JHL | 163.6  | WT | YLWPAPR[G]JHL | 322.87   | 10 | 20.77706 |
| Se138 | CPEB2 G786C   | HLA-C*14:03 | MT | SYFPPK[C]YAF  | 8.02   | WT | SYFPPK[G]YAF  | 7.43     | 10 | 1.17094  |
| Se138 | CPEB2 G786C   | HLA-C*14:03 | MT | YFPPK[C]YAFL  | 16.37  | WT | YFPPK[G]YAFL  | 11.08    | 10 | 1.17094  |
| Se138 | CPEB2 G786C   | HLA-C*14:03 | MT | YFPPK[C]YAF   | 17.01  | WT | YFPPK[G]YAF   | 12.38    | 9  | 1.17094  |
| Se138 | CPEB2 G786C   | HLA-A*24:02 | MT | YFPPK[C]YAF   | 18.53  | WT | YFPPK[G]YAF   | 44.68    | 9  | 1.17094  |
| Se138 | CPEB2 G786C   | HLA-A*24:02 | MT | SYFPPK[C]YAF  | 18.9   | WT | SYFPPK[G]YAF  | 38.44    | 10 | 1.17094  |
| Se138 | CPEB2 G786C   | HLA-A*24:02 | MT | YFPPK[C]YAFL  | 69.09  | WT | YFPPK[G]YAFL  | 100.92   | 10 | 1.17094  |
| Se138 | CPEB2 G786C   | HLA-C*14:03 | MT | FPPK[C]YAFL   | 248.08 | WT | FPPK[G]YAFL   | 184.38   | 10 | 1.17094  |
| Se138 | CPEB2 G786C   | HLA-C*14:03 | MT | SYFPPK[C]YA   | 283.47 | WT | SYFPPK[G]YA   | 448.07   | 9  | 1.17094  |
| Se138 | CPEB2 G786C   | HLA-C*14:03 | MT | FPPK[C]YAFL   | 378.89 | WT | FPPK[G]YAFL   | 258.48   | 9  | 1.17094  |
| Se138 | N4BP2 A1640S  | HLA-A*33:03 | MT | YSK[S]KEAYR   | 26.3   | WT | YSK[A]KEAYR   | 24.44    | 9  | 2.1512   |
| Se138 | N4BP2 A1640S  | HLA-A*33:03 | MT | CYSK[S]KEAYR  | 84.14  | WT | CYSK[A]KEAYR  | 84.62    | 10 | 2.1512   |
| Se138 | C7 G821S      | HLA-A*33:03 | MT | MSECEA[S]ALR  | 292.62 | WT | MSECEA[G]ALR  | 426.71   | 10 | 10.69286 |
| Se138 | CCDC125 S103L | HLA-C*14:03 | MT | YRRQSSD[L]    | 90.45  | WT | YRRQSSD[S]    | 10700.85 | 9  | 5.63376  |
| Se138 | CCDC125 S103L | HLA-C*14:03 | MT | NYRRQSSD[L]   | 184.73 | WT | NYRRQSSD[S]   | 14354.02 | 10 | 5.63376  |
| Se138 | CCDC125 S103L | HLA-C*12:02 | MT | SSTD[L]NSEL   | 444.07 | WT | SSTD[S]NSEL   | 553.14   | 9  | 5.63376  |
| Se138 | CAP2 F130I    | HLA-C*12:02 | MT | NM[I]NHLSAV   | 181.48 | WT | NM[F]NHLSAV   | 122.99   | 9  | 8.74336  |
| Se138 | CAP2 F130I    | HLA-C*14:03 | MT | SNM[I]NHLSAV  | 235    | WT | SNM[F]NHLSAV  | 126.9    | 10 | 8.74336  |
| Se138 | CAP2 F130I    | HLA-C*14:03 | MT | NM[I]NHLSAV   | 395.08 | WT | NM[F]NHLSAV   | 263.33   | 9  | 8.74336  |
| Se138 | BRD2 D151V    | HLA-A*33:03 | MT | S[V]SEEEAHR   | 282.8  | WT | S[D]SEEEAHR   | 13297.57 | 10 | 64.75187 |
| Se138 | SYNGAP1 A351D | HLA-A*33:03 | MT | TVPV[D]TLAGR  | 401.04 | WT | TVPV[A]TLAGR  | 204.36   | 10 | 17.53031 |
| Se138 | KCNQ5 W180L   | HLA-A*33:03 | MT | [L]SAGCCCRYR  | 175.79 | WT | [W]SAGCCCRYR  | 79.21    | 10 | 3.7558   |
| Se138 | ADAP1 R131Q   | HLA-A*33:03 | MT | DWFNAL[Q]AAR  | 33.17  | WT | DWFNAL[R]AAR  | 24.62    | 10 | 17.63369 |
| Se138 | ADAP1 R131Q   | HLA-A*33:03 | MT | WFNAL[Q]AAR   | 42.8   | WT | WFNAL[R]AAR   | 20.02    | 9  | 17.63369 |
| Se138 | ADAP1 R131Q   | HLA-C*14:03 | MT | WFNAL[Q]AARF  | 185.67 | WT | WFNAL[R]AARF  | 105.39   | 10 | 17.63369 |
| Se138 | ADAP1 R131Q   | HLA-C*14:03 | MT | L[Q]AARFHYL   | 434.33 | WT | L[R]AARFHYL   | 150.08   | 9  | 17.63369 |
| Se138 | ADAP1 R131Q   | HLA-C*12:02 | MT | L[Q]AARFHYL   | 497.74 | WT | L[R]AARFHYL   | 1298.43  | 9  | 17.63369 |
| Se138 | HIP1 S582T    | HLA-A*33:03 | MT | DSL[V]TGAHR   | 108.73 | WT | DSL[V]S]GAHR  | 122.08   | 10 | 8.10437  |
| Se138 | HIP1 S582T    | HLA-A*33:03 | MT | SLV[T]GAHR    | 374.92 | WT | SLV[S]GAHR    | 272.6    | 9  | 8.10437  |
| Se138 | FBXL13 Q609H  | HLA-A*33:03 | MT | DL[H]IGCKQLR  | 240.72 | WT | DL[Q]IGCKQLR  | 473.65   | 10 | 2.375    |
| Se138 | ZYX V484A     | HLA-A*33:03 | MT | SFI[A]DQANR   | 78.08  | WT | SFI[V]DQANR   | 125.6    | 9  | 38.57103 |
| Se138 | ZYX V484A     | HLA-A*33:03 | MT | TSFI[A]DQANR  | 130.66 | WT | TSFI[V]DQANR  | 83.27    | 10 | 38.57103 |
| Se138 | ADAM9 W724C   | HLA-A*33:03 | MT | DQL[C]RSYFR   | 16.67  | WT | DQL[W]RSYFR   | 11.74    | 9  | 12.78291 |
| Se138 | ADAM9 W724C   | HLA-A*33:03 | MT | IFIKRDQL[C]R  | 398.09 | WT | IFIKRDQL[W]R  | 220.35   | 10 | 12.78291 |
| Se138 | CUBN G1739A   | HLA-C*12:02 | MT | VSAC[A]GTFYM  | 149.91 | WT | VSAC[G]GTFYM  | 184.65   | 10 | 2.43566  |
| Se138 | CUBN G1739A   | HLA-C*12:02 | MT | SAC[A]GTFYM   | 178.39 | WT | SAC[G]GTFYM   | 170.98   | 9  | 2.43566  |
| Se138 | CUBN G1739A   | HLA-C*14:03 | MT | SAC[A]GTFYM   | 403.76 | WT | SAC[G]GTFYM   | 406.98   | 9  | 2.43566  |
| Se138 | CUBN G1739A   | HLA-C*14:03 | MT | SVSAC[A]GTF   | 458.68 | WT | SVSAC[G]GTF   | 512.94   | 9  | 2.43566  |
| Se138 | MMRN2 V239G   | HLA-A*24:02 | MT | TFLQ[G]HFSPI  | 73.76  | WT | TFLQ[V]HFSPI  | 67.8     | 10 | 2.51583  |
| Se138 | MMRN2 V239G   | HLA-C*14:03 | MT | TFLQ[G]HFSPI  | 113.09 | WT | TFLQ[V]HFSPI  | 259.58   | 10 | 2.51583  |
| Se138 | MMRN2 V239G   | HLA-C*12:02 | MT | FLQ[G]HFSPI   | 229.45 | WT | FLQ[V]HFSPI   | 543.93   | 9  | 2.51583  |
| Se138 | MMRN2 V239G   | HLA-C*14:03 | MT | FLQ[G]HFSPI   | 268.12 | WT | FLQ[V]HFSPI   | 585.13   | 9  | 2.51583  |
| Se138 | DYRK4 F175I   | HLA-A*33:03 | MT | HMKDFFY[I]R   | 7.02   | WT | HMKDFFY[F]R   | 3.48     | 9  | 10.46511 |
| Se138 | DYRK4 F175I   | HLA-A*24:02 | MT | FY[I]RNHFCI   | 9.65   | WT | FY[F]RNHFCI   | 11.67    | 9  | 10.46511 |
| Se138 | DYRK4 F175I   | HLA-C*14:03 | MT | FY[I]RNHFCI   | 48.99  | WT | FY[F]RNHFCI   | 25.4     | 9  | 10.46511 |
| Se138 | DYRK4 F175I   | HLA-C*14:03 | MT | Y[I]RNHFCITF  | 99.29  | WT | Y[F]RNHFCITF  | 22.95    | 10 | 10.46511 |
| Se138 | DYRK4 F175I   | HLA-C*12:02 | MT | Y[I]RNHFCITF  | 244.23 | WT | Y[F]RNHFCITF  | 1268.14  | 10 | 10.46511 |
| Se138 | DYRK4 F175I   | HLA-C*14:03 | MT | [I]RNHFCITF   | 252.61 | WT | [F]RNHFCITF   | 79.05    | 9  | 10.46511 |
| Se138 | DYRK4 F175I   | HLA-A*24:02 | MT | VHMKDFFY[I]   | 271.83 | WT | VHMKDFFY[F]   | 65.43    | 9  | 10.46511 |
| Se138 | DYRK4 F175I   | HLA-C*14:03 | MT | FFY[I]RNHFCI  | 320.24 | WT | FFY[F]RNHFCI  | 161.57   | 10 | 10.46511 |



|       |                  |             |    |               |        |    |               |          |    |          |
|-------|------------------|-------------|----|---------------|--------|----|---------------|----------|----|----------|
| Se138 | RAB3IP T128I     | HLA-A*33:03 | MT | DIFPCL[I]FSK  | 114.03 | WT | DIFPCL[T]FSK  | 101.97   | 10 | 4.81     |
| Se138 | RAB3IP T128I     | HLA-B*44:03 | MT | QEDIFPCL[I]F  | 490.44 | WT | QEDIFPCL[T]F  | 323.35   | 10 | 4.81     |
| Se138 | ATP8A2 S595P     | HLA-C*14:03 | MT | AYADL[P]ENEY  | 274.44 | WT | AYADL[S]ENEY  | 317.39   | 10 | 1.35595  |
| Se138 | KCNRG V112I      | HLA-A*33:03 | MT | ALVE[I]HFLSR  | 193.19 | WT | ALVE[V]HFLSR  | 202.22   | 10 | 5.4667   |
| Se138 | KCNRG V112I      | HLA-A*33:03 | MT | LVE[I]HFLSR   | 365.01 | WT | LVE[V]HFLSR   | 330.86   | 9  | 5.4667   |
| Se138 | SUPT16H F687I    | HLA-A*33:03 | MT | NG[I]RFRTSVR  | 162.95 | WT | NG[F]RFRTSVR  | 67.19    | 9  | 44.46929 |
| Se138 | SUPT16H F687I    | HLA-B*44:03 | MT | LEAHVNG[I]RF  | 190.15 | WT | LEAHVNG[F]RF  | 121.72   | 10 | 44.46929 |
| Se138 | SUPT16H F687I    | HLA-C*12:02 | MT | HVNG[I]RFRTSV | 413.16 | WT | HVNG[F]RFRTSV | 327.31   | 10 | 44.46929 |
| Se138 | ARRDC4 L397V     | HLA-C*12:02 | MT | FQPPP[V]YSEV  | 67.9   | WT | FQPPP[L]YSEV  | 115.08   | 10 | 2.36212  |
| Se138 | ARRDC4 L397V     | HLA-C*14:03 | MT | FQPPP[V]YSEV  | 265.99 | WT | FQPPP[L]YSEV  | 348.26   | 10 | 2.36212  |
| Se138 | ARRDC4 L397V     | HLA-C*14:03 | MT | FRFQPPP[V]Y   | 308.99 | WT | FRFQPPP[L]Y   | 303.51   | 9  | 2.36212  |
| Se138 | ARRDC4 L397V     | HLA-C*12:02 | MT | FRFQPPP[V]Y   | 435.75 | WT | FRFQPPP[L]Y   | 671.05   | 9  | 2.36212  |
| Se138 | MVP D355E        | HLA-A*33:03 | MT | HQAG[E]HWLIR  | 294.68 | WT | HQAG[D]HWLIR  | 275.94   | 10 | 12.83591 |
| Se138 | MVP D355E        | HLA-A*24:02 | MT | HQAG[E]HWLI   | 425.14 | WT | HQAG[D]HWLI   | 822.68   | 9  | 12.83591 |
| Se138 | TLDC1 A334S      | HLA-C*12:02 | MT | FSICPSM[S]V   | 10.2   | WT | FSICPSM[A]V   | 9.01     | 9  | 3.03036  |
| Se138 | TLDC1 A334S      | HLA-C*12:02 | MT | FSICPSM[S]VY  | 11.74  | WT | FSICPSM[A]VY  | 12.26    | 10 | 3.03036  |
| Se138 | TLDC1 A334S      | HLA-C*12:02 | MT | M[S]VYTHTYG   | 187.6  | WT | M[A]VYTHTYG   | 120.16   | 9  | 3.03036  |
| Se138 | TLDC1 A334S      | HLA-C*14:03 | MT | FSICPSM[S]VY  | 230.56 | WT | FSICPSM[A]VY  | 202.43   | 10 | 3.03036  |
| Se138 | LIG1 A724D       | HLA-B*44:03 | MT | EELQ[D]ICKL   | 467.86 | WT | EELQ[A]ICKL   | 322.08   | 9  | 19.12802 |
| Se138 | C20orf194 G1133S | HLA-C*12:02 | MT | F[S]DKTDFHPL  | 256.03 | WT | F[G]DKTDFHPL  | 2036.42  | 10 | 1.6006   |
| Se139 | CADM3 Y71S       | HLA-A*33:03 | MT | [S]FGEKRALR   | 53.01  | WT | [Y]FGEKRALR   | 46.28    | 9  | 6.60858  |
| Se139 | CADM3 Y71S       | HLA-A*33:03 | MT | L[S]FGEKRALR  | 131.32 | WT | L[Y]FGEKRALR  | 70.91    | 10 | 6.60858  |
| Se139 | CADM3 Y71S       | HLA-A*33:03 | MT | QTL[S]FGEKR   | 145.73 | WT | QTL[Y]FGEKR   | 113.31   | 9  | 6.60858  |
| Se139 | BMPR2 S704C      | HLA-C*03:04 | MT | STS[C]SLLYPL  | 214.36 | WT | STS[S]SLLYPL  | 147.29   | 10 | 12.71961 |
| Se139 | BMPR2 S704C      | HLA-C*03:04 | MT | LSSTS[C]SLL   | 426.66 | WT | LSSTS[S]SLL   | 156.9    | 9  | 12.71961 |
| Se139 | DIS3L2 R794H     | HLA-A*03:04 | MT | [H]IYCNALAL   | 13.86  | WT | [R]IYCNALAL   | 34.99    | 9  | 3.90187  |
| Se139 | DIS3L2 R794H     | HLA-A*33:03 | MT | [H]IYCNALALR  | 26.35  | WT | [R]IYCNALALR  | 201.53   | 10 | 3.90187  |
| Se139 | DIS3L2 R794H     | HLA-A*33:03 | MT | [H]IYCNALAL   | 63.65  | WT | [R]IYCNALAL   | 57       | 9  | 3.90187  |
| Se139 | MLPH S444C       | HLA-A*33:03 | MT | D[C]FDRKSVYR  | 56.51  | WT | D[S]FDRKSVYR  | 12.49    | 10 | 3.84134  |
| Se139 | MLPH S444C       | HLA-A*33:03 | MT | [C]FDRKSVYR   | 129.88 | WT | [S]FDRKSVYR   | 181.79   | 9  | 3.84134  |
| Se139 | TACC3 P353R      | HLA-A*33:03 | MT | GATSKRAP[R]   | 153.57 | WT | GATSKRAP[P]   | 37706.48 | 9  | 19.44029 |
| Se139 | TACC3 P353R      | HLA-A*33:03 | MT | TSKRAP[R]PRR  | 267.46 | WT | TSKRAP[P]PRR  | 363.83   | 10 | 19.44029 |
| Se139 | TACC3 P353R      | HLA-A*33:03 | MT | TSKRAP[R]PR   | 300.62 | WT | TSKRAP[P]PR   | 153.26   | 9  | 19.44029 |
| Se139 | RBM47 S6Y        | HLA-C*03:04 | MT | MTAED[Y]TAAM  | 9.62   | WT | MTAED[S]TAAM  | 7.75     | 10 | 14.49542 |
| Se139 | RBM47 S6Y        | HLA-A*26:01 | MT | MTAED[Y]TAAM  | 10.47  | WT | MTAED[S]TAAM  | 16.16    | 10 | 14.49542 |
| Se139 | RBM47 S6Y        | HLA-C*03:04 | MT | TAED[Y]TAAM   | 79.48  | WT | TAED[S]TAAM   | 74.68    | 9  | 14.49542 |
| Se139 | RBM47 S6Y        | HLA-C*14:03 | MT | MTAED[Y]TAAM  | 98.18  | WT | MTAED[S]TAAM  | 122.13   | 10 | 14.49542 |
| Se139 | SLC4A4 L625W     | HLA-A*33:03 | MT | TFDWF[A]FWSK  | 29.08  | WT | TFDWF[L]JSK   | 111.91   | 10 | 1.43438  |
| Se139 | SLC4A4 L625W     | HLA-A*33:03 | MT | TFDWF[A]WJSK  | 267.63 | WT | TFDWF[L]JSK   | 2178.9   | 9  | 1.43438  |
| Se139 | ZNF827 V920M     | HLA-C*03:04 | MT | FVSHMSLH[M]   | 19.07  | WT | FVSHMSLH[V]   | 155.95   | 9  | 3.07992  |
| Se139 | ZNF827 V920M     | HLA-C*14:03 | MT | FVSHMSLH[M]   | 262.85 | WT | FVSHMSLH[V]   | 1367.38  | 9  | 3.07992  |
| Se139 | ZNF827 V920M     | HLA-C*14:03 | MT | QFVSHMSLH[M]  | 361.56 | WT | QFVSHMSLH[V]  | 1414.1   | 10 | 3.07992  |
| Se139 | SPRY4 V129L      | HLA-A*33:03 | MT | DQASPR[A]VJR  | 33.3   | WT | DQASPR[A]VJR  | 119.68   | 9  | 6.47199  |
| Se139 | SPRY4 V129L      | HLA-C*03:04 | MT | VADQASPR[A]L  | 43.76  | WT | VADQASPR[A]V  | 199.5    | 10 | 6.47199  |
| Se139 | FAM65B P4A       | HLA-A*33:03 | MT | L[A]SRLHWIR   | 62.27  | WT | L[P]SRLHWIR   | 440.01   | 9  | 2.35894  |
| Se139 | FAM65B P4A       | HLA-A*33:03 | MT | VL[A]SRLHWIR  | 69.11  | WT | VL[P]SRLHWIR  | 249.62   | 10 | 2.35894  |
| Se139 | FAM65B P4A       | HLA-A*33:03 | MT | [A]SRLHWIRNR  | 340.55 | WT | [P]SRLHWIRNR  | 1698.38  | 10 | 2.35894  |
| Se139 | ARID1B A1870P    | HLA-A*33:03 | MT | ATIDDVLS[P]JR | 74.26  | WT | ATIDDVLS[A]JR | 118.25   | 10 | 7.84714  |
| Se139 | ARID1B A1870P    | HLA-A*33:03 | MT | TIDDVLS[P]JR  | 131.5  | WT | TIDDVLS[A]JR  | 236.73   | 9  | 7.84714  |
| Se139 | ARID1B A1870P    | HLA-C*14:03 | MT | VLS[P]RPGAL   | 435.53 | WT | VLS[A]RPGAL   | 1029.16  | 9  | 7.84714  |
| Se139 | ARID1B A1870P    | HLA-C*03:04 | MT | VLS[P]RPGAL   | 451.03 | WT | VLS[A]RPGAL   | 800.2    | 9  | 7.84714  |
| Se139 | SDK1 D1174V      | HLA-C*03:04 | MT | [V]VAPTSVTV   | 182.83 | WT | [D]VAPTSVTV   | 3269.61  | 9  | 2.56567  |
| Se139 | SDK1 D1174V      | HLA-A*33:03 | MT | [V]VAPTSVTVR  | 228.38 | WT | [D]VAPTSVTVR  | 60.6     | 10 | 2.56567  |
| Se139 | CDK13 R860G      | HLA-C*03:04 | MT | LADFGLA[G]JL  | 217.37 | WT | LADFGLA[R]JL  | 218.49   | 9  | 9.11206  |
| Se139 | CACNA2D1 N154D   | HLA-A*33:03 | MT | VFIEDA[D]FGR  | 328.42 | WT | VFIEDA[N]FGR  | 148.21   | 10 | 2.44222  |
| Se139 | TMEM67 P7L       | HLA-A*33:03 | MT | MSLSHW[L]YFR  | 5.75   | WT | MSLSHW[P]YFR  | 5.44     | 10 | 2.03195  |
| Se139 | TMEM67 P7L       | HLA-A*33:03 | MT | SLSHW[L]YFR   | 12.92  | WT | SLSHW[P]YFR   | 13.88    | 9  | 2.03195  |
| Se139 | TMEM67 P7L       | HLA-A*33:03 | MT | [L]YFRLVLFNR  | 26.65  | WT | [P]YFRLVLFNR  | 209.84   | 10 | 2.03195  |
| Se139 | TMEM67 P7L       | HLA-C*03:04 | MT | MSLSHW[L]YF   | 95.26  | WT | MSLSHW[P]YF   | 192.48   | 9  | 2.03195  |
| Se139 | TMEM67 P7L       | HLA-C*14:03 | MT | [L]YFRLVLFN   | 116.2  | WT | [P]YFRLVLFN   | 1058     | 9  | 2.03195  |
| Se139 | TMEM67 P7L       | HLA-C*14:03 | MT | MSLSHW[L]YF   | 125.43 | WT | MSLSHW[P]YF   | 187.22   | 9  | 2.03195  |
| Se139 | TMEM67 P7L       | HLA-C*14:03 | MT | HW[L]YFRLVL   | 346.86 | WT | HW[P]YFRLVL   | 65.41    | 9  | 2.03195  |
| Se139 | RECQL4 R766G     | HLA-C*03:04 | MT | RAFMQGQL[G]V  | 291.1  | WT | RAFMQGQL[R]V  | 318.48   | 10 | 7.79825  |
| Se139 | EIF3A F184S      | HLA-A*33:03 | MT | AFK[S]CLQYTR  | 72.8   | WT | AFK[F]CLQYTR  | 51.67    | 10 | 45.84685 |
| Se139 | EIF3A F184S      | HLA-C*03:04 | MT | IAQQAFK[S]JCL | 228.07 | WT | IAQQAFK[F]JCL | 467.13   | 10 | 45.84685 |
| Se139 | TECPR2 E356A     | HLA-C*14:03 | MT | SRP[A]GLTSTV  | 287.37 | WT | SRP[E]GLTSTV  | 382.18   | 10 | 2.41773  |
| Se139 | TECPR2 E356A     | HLA-C*14:03 | MT | IRISSRP[A]JGL | 454.19 | WT | IRISSRP[E]JGL | 955.93   | 10 | 2.41773  |
| Se139 | MLST8 W274R      | HLA-C*14:03 | MT | RGWM[R]GCAF   | 175.66 | WT | RGWM[W]GCAF   | 300.6    | 9  | 10.16946 |
| Se139 | MLST8 W274R      | HLA-C*14:03 | MT | SRGWM[R]GCAF  | 455.65 | WT | SRGWM[W]GCAF  | 474.51   | 10 | 10.16946 |
| Se139 | PKMYT1 L277M     | HLA-A*33:03 | MT | MMLEPDPK[M]JR | 98.7   | WT | MMLEPDPK[L]JR | 60.36    | 10 | 3.73198  |
| Se139 | PKMYT1 L277M     | HLA-C*14:03 | MT | K[M]RATAEAL   | 262.3  | WT | K[L]RATAEAL   | 793.27   | 9  | 3.73198  |
| Se139 | PKMYT1 L277M     | HLA-C*03:04 | MT | MMLEPDPK[M]   | 476.55 | WT | MMLEPDPK[L]   | 621.48   | 9  | 3.73198  |
| Se139 | RANBP10 D492N    | HLA-A*33:03 | MT | SM[N]DRHPRR   | 34.33  | WT | SM[D]DRHPRR   | 436.72   | 9  | 5.06346  |
| Se139 | RANBP10 D492N    | HLA-A*33:03 | MT | SSM[N]DRHPR   | 40.11  | WT | SSM[D]DRHPR   | 39.85    | 9  | 5.06346  |
| Se139 | RANBP10 D492N    | HLA-A*33:03 | MT | SSM[N]DRHPRR  | 101.73 | WT | SSM[D]DRHPRR  | 120.42   | 10 | 5.06346  |
| Se139 | RANBP10 D492N    | HLA-A*33:03 | MT | ESSM[N]DRHPR  | 130.85 | WT | ESSM[D]DRHPR  | 250.09   | 10 | 5.06346  |
| Se139 | TP53 Y87H        | HLA-C*03:04 | MT | SVTCT[H]SPAL  | 138.75 | WT | SVTCT[Y]SPAL  | 164.27   | 10 | 26.15264 |
| Se139 | DSC2 P139L       | HLA-C*03:04 | MT | WA[L]IPCSML   | 104.2  | WT | WA[P]IPCSML   | 150.59   | 9  | 27.06926 |

|       |                |             |    |               |        |    |               |          |    |          |
|-------|----------------|-------------|----|---------------|--------|----|---------------|----------|----|----------|
| Se139 | DSC2 P139L     | HLA-C*14:03 | MT | RWA[L]IPCSM   | 106.92 | WT | RWA[P]IPCSM   | 42.76    | 9  | 27.06926 |
| Se139 | DSC2 P139L     | HLA-C*14:03 | MT | RRAKRRWA[L]   | 181.53 | WT | RRAKRRWA[P]   | 13201.86 | 9  | 27.06926 |
| Se139 | DSC2 P139L     | HLA-C*14:03 | MT | RWA[L]IPCSML  | 248.17 | WT | RWA[P]IPCSML  | 104.28   | 10 | 27.06926 |
| Se139 | DSC2 P139L     | HLA-C*14:03 | MT | RRWA[L]IPCSM  | 279.15 | WT | RRWA[P]IPCSM  | 307.17   | 10 | 27.06926 |
| Se139 | DSC2 P139L     | HLA-C*14:03 | MT | LRRAKRRWA[L]  | 356.2  | WT | LRRAKRRWA[P]  | 18993.09 | 10 | 27.06926 |
| Se139 | PARD6G P249R   | HLA-A*33:03 | MT | IVTVK[R]ANQR  | 85.69  | WT | IVTVK[P]ANQR  | 180.92   | 10 | 1.93436  |
| Se139 | PARD6G P249R   | HLA-A*33:03 | MT | HNLIVTVK[R]   | 92.89  | WT | HNLIVTVK[P]   | 27712.7  | 9  | 1.93436  |
| Se139 | PARD6G P249R   | HLA-A*33:03 | MT | VTVK[R]ANQR   | 165.48 | WT | VTVK[P]ANQR   | 397.84   | 9  | 1.93436  |
| Se139 | PARD6G P249R   | HLA-C*03:04 | MT | [R]ANQRNNVV   | 432.5  | WT | [P]ANQRNNVV   | 14161.91 | 9  | 1.93436  |
| Se139 | AP3D1 D146G    | HLA-C*03:04 | MT | FVTPDLAR[G]L  | 90.9   | WT | FVTPDLAR[D]L  | 129.31   | 10 | 17.2198  |
| Se139 | JSRP1 L143P    | HLA-C*03:04 | MT | SAFQ[P]CRDAV  | 118.78 | WT | SAFQ[L]CRDAV  | 210.64   | 10 | 3.38382  |
| Se139 | JSRP1 L143P    | HLA-C*14:03 | MT | SAFQ[P]CRDAV  | 485.22 | WT | SAFQ[L]CRDAV  | 596.54   | 10 | 3.38382  |
| Se139 | JSRP1 L143P    | HLA-C*14:03 | MT | AFQ[P]CRDAV   | 499.22 | WT | AFQ[L]CRDAV   | 885.11   | 9  | 3.38382  |
| Se139 | FZR1 Q218H     | HLA-A*33:03 | MT | WSACTS[H]VTR  | 121.8  | WT | WSACTS[Q]VTR  | 394.16   | 10 | 6.00873  |
| Se139 | FZR1 Q218H     | HLA-A*33:03 | MT | SACTS[H]VTR   | 143.35 | WT | SACTS[Q]VTR   | 441.27   | 9  | 6.00873  |
| Se139 | FZR1 Q218H     | HLA-C*03:04 | MT | SACTS[H]VTRL  | 480.02 | WT | SACTS[Q]VTRL  | 985.74   | 10 | 6.00873  |
| Se139 | CACTIN S67T    | HLA-A*33:03 | MT | [T]GMRSRSPPR  | 180.19 | WT | [S]GMRSRSPPR  | 284.99   | 10 | 3.86347  |
| Se139 | PTPRS M16I     | HLA-C*03:04 | MT | MVSVVGP[M]GL  | 142.35 | WT | MVSVVGP[M]GL  | 133.61   | 10 | 8.35034  |
| Se139 | PTPRS M16I     | HLA-A*26:01 | MT | SVVGP[I]GLL   | 227.89 | WT | SVVGP[M]GLL   | 128.39   | 9  | 8.35034  |
| Se139 | PTPRS M16I     | HLA-C*03:04 | MT | SVVGP[I]GLL   | 474.03 | WT | SVVGP[M]GLL   | 313.7    | 9  | 8.35034  |
| Se139 | DNM2 E588D     | HLA-A*33:03 | MT | FAIFNT[D]QR   | 122.36 | WT | FAIFNT[E]QR   | 106.27   | 9  | 23.36378 |
| Se139 | DNM2 E588D     | HLA-A*33:03 | MT | [D]QRNVYKDLR  | 239.84 | WT | [E]QRNVYKDLR  | 169.6    | 10 | 23.36378 |
| Se139 | DNM2 E588D     | HLA-A*33:03 | MT | VFAIFNT[D]QR  | 275.51 | WT | VFAIFNT[E]QR  | 200.33   | 10 | 23.36378 |
| Se139 | TMED1 Y47H     | HLA-C*03:04 | MT | [H]QSAPANASL  | 209.27 | WT | [Y]QSAPANASL  | 16.12    | 10 | 9.27877  |
| Se139 | SIX5 A117V     | HLA-C*14:03 | MT | RFLGALPP[V]   | 195.52 | WT | RFLGALPP[A]   | 1535.38  | 9  | 5.93232  |
| Se139 | SIX5 A117V     | HLA-A*14:03 | MT | SRLGALPP[V]   | 284.79 | WT | SRLGALPP[A]   | 2284.86  | 10 | 5.93232  |
| Se139 | AP2A1 G202S    | HLA-C*03:04 | MT | M[S]VVTAAVSL  | 13.87  | WT | M[G]VVTAAVSL  | 97.7     | 10 | 16.31834 |
| Se139 | AP2A1 G202S    | HLA-C*03:04 | MT | [S]VVTAAVSL   | 36.05  | WT | [G]VVTAAVSL   | 382.39   | 9  | 16.31834 |
| Se139 | AP2A1 G202S    | HLA-C*03:04 | MT | HM[S]VVTAAV   | 391.62 | WT | HM[G]VVTAAV   | 3698.87  | 9  | 16.31834 |
| Se139 | AP2A1 G202S    | HLA-C*03:04 | MT | [S]VVTAAVSLI  | 395.65 | WT | [G]VVTAAVSLI  | 3359.35  | 10 | 16.31834 |
| Se139 | ATF5 R280L     | HLA-C*14:03 | MT | VYKARSQRT[L]  | 35.74  | WT | VYKARSQRT[R]  | 7753.8   | 10 | 25.92129 |
| Se139 | SIGLEC1 R376W  | HLA-A*33:03 | MT | HTL[W]LHLATR  | 7.78   | WT | HTL[R]LHLATR  | 9.46     | 10 | 7.09482  |
| Se139 | SIGLEC1 R376W  | HLA-A*33:03 | MT | TL[W]LHLATR   | 39.03  | WT | TL[R]LHLATR   | 47.74    | 9  | 7.09482  |
| Se139 | SIGLEC1 R376W  | HLA-B*44:03 | MT | LEDAHSHTL[W]  | 62.17  | WT | LEDAHSHTL[R]  | 13841.56 | 10 | 7.09482  |
| Se139 | CTNBNL1 G523V  | HLA-A*33:03 | MT | R[V]SSIKIVR   | 213.49 | WT | R[G]SSIKIVR   | 3871.67  | 9  | 15.84773 |
| Se139 | HMGB3 S42F     | HLA-A*33:03 | MT | EF[F]KKCSER   | 11.22  | WT | EF[S]KKCSER   | 65.83    | 9  | 19.09539 |
| Se139 | HMGB3 S42F     | HLA-A*26:01 | MT | EVVPNFAEF[F]  | 380.75 | WT | EVVPNFAEF[S]  | 11056.01 | 10 | 19.09539 |
| Se140 | KCNK2 I99R     | HLA-A*31:01 | MT | IVIQQQTF[R]   | 33.97  | WT | IVIQQQTF[I]   | 14131.3  | 9  | 1.06368  |
| Se140 | KCNK2 I99R     | HLA-A*31:01 | MT | TIVIQQTF[R]   | 126.03 | WT | TIVIQQTF[I]   | 23581.81 | 10 | 1.06368  |
| Se140 | UBR3 M405V     | HLA-A*02:07 | MT | KMVTFLN[V]    | 418.13 | WT | KMVTFLN[M]    | 7045.27  | 9  | 6.44882  |
| Se140 | DIS3L2 H81R    | HLA-A*31:01 | MT | VLRINPKK[F]R  | 106.32 | WT | VLRINPKK[F]H  | 12703.42 | 10 | 4.58074  |
| Se140 | CRBN Q172K     | HLA-A*31:01 | MT | RFKVLRLT[K]   | 210.56 | WT | RFKVLRLT[Q]   | 15929.84 | 10 | 9.74167  |
| Se140 | KMT2E S780N    | HLA-C*14:02 | MT | TY[N]PHVYST   | 459.46 | WT | TY[S]PHVYST   | 628.72   | 9  | 16.40657 |
| Se140 | TNPO3 V473I    | HLA-C*14:02 | MT | RLPET[V]HTAV  | 489.95 | WT | RLPET[I]HTAV  | 548.54   | 10 | 12.73761 |
| Se140 | SLC25A29 E116K | HLA-A*31:01 | MT | RALGC[K]PGDR  | 146.32 | WT | RALGC[E]PGDR  | 405.99   | 10 | 20.11323 |
| Se140 | SMG1 C2738R    | HLA-A*31:01 | MT | KQEAVTVPV[R]  | 159.47 | WT | KQEAVTVPV[C]  | 31163.49 | 10 | 11.11453 |
| Se140 | CNOT1 R1678C   | HLA-C*14:02 | MT | [C]YRECHLLVL  | 50.73  | WT | [R]YRECHLLVL  | 21.55    | 10 | 16.22133 |
| Se140 | CNOT1 R1678C   | HLA-C*14:02 | MT | [C]YRECHLLV   | 257.09 | WT | [R]YRECHLLV   | 93.4     | 9  | 16.22133 |
| Se140 | TP53 P19S      | HLA-A*31:01 | MT | ST[S]PPGTRVR  | 279.64 | WT | ST[P]PPGTRVR  | 759.65   | 10 | 29.03961 |
| Se140 | TP53 P19S      | HLA-C*14:02 | MT | [S]PPGTRVRAM  | 381.9  | WT | [P]PPGTRVRAM  | 5634.23  | 10 | 29.03961 |
| Se140 | CASKIN2 P980L  | HLA-C*14:02 | MT | LAPSPAMQP[L]  | 164.79 | WT | LAPSPAMQP[P]  | 16475.08 | 10 | 8.98975  |
| Se140 | ELL N530S      | HLA-C*14:02 | MT | SYKNDF[S]AEY  | 101.79 | WT | SYKNDF[N]AEY  | 115.29   | 9  | 3.73314  |
| Se140 | ELL N530S      | HLA-A*31:01 | MT | F[S]AEYSEYR   | 259.61 | WT | F[N]AEYSEYR   | 869.56   | 9  | 3.73314  |
| Se141 | INADL T545N    | HLA-A*02:01 | MT | VMVA[N]LDTQI  | 173.98 | WT | VMVA[T]LDTQI  | 193.52   | 10 | 8.28035  |
| Se141 | LRRRC8 Y126F   | HLA-A*24:02 | MT | WYAK[F]FPYL   | 28.19  | WT | WYAK[Y]FPYL   | 14.03    | 9  | 1.29425  |
| Se141 | LRRRC8 Y126F   | HLA-A*24:02 | MT | WYAK[Y]FPYL   | 42.69  | WT | WYAK[Y]FPYLV  | 30.61    | 10 | 1.29425  |
| Se141 | LRRRC8 Y126F   | HLA-A*24:02 | MT | K[F]FPYLVLI   | 60.09  | WT | K[Y]FPYLVLI   | 7.7      | 9  | 1.29425  |
| Se141 | LRRRC8 Y126F   | HLA-A*24:02 | MT | RALHWYAK[F]   | 66.63  | WT | RALHWYAK[Y]   | 8715.33  | 9  | 1.29425  |
| Se141 | LRRRC8 Y126F   | HLA-A*24:02 | MT | HWYAK[F]FPYL  | 207.28 | WT | HWYAK[Y]FPYL  | 142.76   | 10 | 1.29425  |
| Se141 | LRRRC8 Y126F   | HLA-A*24:02 | MT | RALHWYAK[F]F  | 303.87 | WT | RALHWYAK[Y]F  | 353.96   | 10 | 1.29425  |
| Se141 | TROVE2 A494S   | HLA-A*02:01 | MT | KMDIP[S]KLIV  | 316.1  | WT | KMDIP[A]KLIV  | 340.18   | 10 | 5.18306  |
| Se141 | HEATR1 Q247E   | HLA-A*02:01 | MT | KLFPY[I]E]KGL | 23.74  | WT | KLFPY[I]Q]KGL | 17.22    | 10 | 8.46766  |
| Se141 | TGFBRAP1 E108D | HLA-A*02:01 | MT | LVNMLNL[D]PV  | 297.54 | WT | LVNMLNL[E]PV  | 208.18   | 10 | 7.83668  |
| Se141 | CNTN3 D561G    | HLA-A*02:01 | MT | [G]LMIRNIQL   | 106.94 | WT | [D]LMIRNIQL   | 3037.65  | 9  | 2.89375  |
| Se141 | DNAJC13 K1359R | HLA-A*02:01 | MT | FLCTKSA[R]I   | 102.68 | WT | FLCTKSA[K]I   | 99.52    | 9  | 10.09728 |
| Se141 | DNAJC13 K1359R | HLA-A*02:01 | MT | FLCTKSA[R]IV  | 170.24 | WT | FLCTKSA[K]IV  | 197.87   | 10 | 10.09728 |
| Se141 | GRSF1 C11W     | HLA-A*02:01 | MT | VLNFFSD[W]RI  | 99.41  | WT | VLNFFSD[C]RI  | 380.59   | 10 | 18.28174 |
| Se141 | FKBP5 L217S    | HLA-B*15:01 | MT | MQREEQC[S]Y   | 11.82  | WT | MQREEQC[L]Y   | 20.62    | 10 | 3.75456  |
| Se141 | FKBP5 L217S    | HLA-A*24:02 | MT | [S]YLGPRYGF   | 43.7   | WT | [L]YLGPRYGF   | 50.92    | 9  | 3.75456  |
| Se141 | FKBP5 L217S    | HLA-B*15:01 | MT | I[S]YLGPRYGF  | 421.41 | WT | I[L]YLGPRYGF  | 278.79   | 10 | 3.75456  |
| Se141 | STK17A T244A   | HLA-A*02:01 | MT | SMA[A]DMWSI   | 5.42   | WT | SMA[T]DMWSI   | 6.98     | 9  | 6.70582  |
| Se141 | STK17A T244A   | HLA-A*02:01 | MT | MA[A]DMWSIGV  | 53.41  | WT | MA[T]DMWSIGV  | 391.75   | 10 | 6.70582  |
| Se141 | STK17A T244A   | HLA-A*02:01 | MT | ISMA[A]DMWSI  | 368.36 | WT | ISMA[T]DMWSI  | 447.32   | 10 | 6.70582  |
| Se141 | STK17A T244A   | HLA-B*15:01 | MT | SMA[A]DMWSI   | 439.05 | WT | SMA[T]DMWSI   | 635.22   | 9  | 6.70582  |
| Se141 | STK17A T244A   | HLA-A*02:01 | MT | A[A]DMWSIGV   | 468.88 | WT | A[T]DMWSIGV   | 199.43   | 9  | 6.70582  |
| Se141 | PLPP6 I183M    | HLA-A*02:01 | MT | LLLVALL[I]KGL | 160.83 | WT | LLLVALL[I]KGL | 115.51   | 10 | 12.51616 |
| Se141 | PLPP6 I183M    | HLA-A*02:01 | MT | LLDLLLVAL[M]  | 194.34 | WT | LLDLLLVAL[I]  | 77.47    | 10 | 12.51616 |
| Se141 | PLPP6 I183M    | HLA-A*02:01 | MT | LLVAL[M]KGLV  | 317.33 | WT | LLVAL[I]KGLV  | 218.29   | 10 | 12.51616 |

|       |                |             |    |               |        |    |               |          |    |          |
|-------|----------------|-------------|----|---------------|--------|----|---------------|----------|----|----------|
| Se141 | PLPP6 I183M    | HLA-A*02:01 | MT | LLVAL[M]KGL   | 384.37 | WT | LLVAL[I]KGL   | 145.05   | 9  | 12.51616 |
| Se141 | TEK S41C       | HLA-B*40:06 | MT | AET[C]LTCIA   | 280.97 | WT | AET[S]LTCIA   | 373.06   | 9  | 1.29784  |
| Se141 | WNK2 D2293E    | HLA-A*02:01 | MT | ASFAAS[E]PV   | 461.79 | WT | ASFAAS[D]PV   | 683.02   | 9  | 5.61775  |
| Se141 | RIC8A P360T    | HLA-A*02:01 | MT | FLKAQGWPP[T]  | 229.35 | WT | FLKAQGWPP[P]  | 4042.28  | 10 | 26.76658 |
| Se141 | MRV11 A296D    | HLA-A*02:01 | MT | RLA[D]RLSSRA  | 178.04 | WT | RLA[A]RLSSRA  | 591.19   | 10 | 1.23412  |
| Se141 | NCKAP1L Y88F   | HLA-B*24:02 | MT | SYLDLIVT[F]   | 6.18   | WT | SYLDLIVT[Y]   | 463.77   | 9  | 3.74143  |
| Se141 | NCKAP1L Y88F   | HLA-A*02:01 | MT | YLDLIVT[F]T   | 43.2   | WT | YLDLIVT[Y]T   | 26.91    | 9  | 3.74143  |
| Se141 | NCKAP1L Y88F   | HLA-A*02:01 | MT | YLDLIVT[F]TS  | 128.76 | WT | YLDLIVT[Y]TS  | 124.57   | 10 | 3.74143  |
| Se141 | NCKAP1L Y88F   | HLA-B*15:01 | MT | RSYLDLIVT[F]  | 143.6  | WT | RSYLDLIVT[Y]  | 130.69   | 10 | 3.74143  |
| Se141 | NCKAP1L Y88F   | HLA-A*24:02 | MT | T[Y]TSVILL    | 255.65 | WT | T[Y]TSVILL    | 21.08    | 9  | 3.74143  |
| Se141 | SACS N605S     | HLA-B*15:01 | MT | RLIKEVM[S]TF  | 11.06  | WT | RLIKEVM[N]TF  | 16.71    | 10 | 2.164    |
| Se141 | SACS N605S     | HLA-B*15:01 | MT | LIKEVM[S]TF   | 20.4   | WT | LIKEVM[N]TF   | 35.96    | 9  | 2.164    |
| Se141 | SACS N605S     | HLA-A*02:01 | MT | RLIKEVM[S]T   | 263.46 | WT | RLIKEVM[N]T   | 425.29   | 9  | 2.164    |
| Se141 | SACS N605S     | HLA-A*24:02 | MT | RLIKEVM[S]TF  | 373.35 | WT | RLIKEVM[N]TF  | 307.1    | 10 | 2.164    |
| Se141 | GPATCH2L S452C | HLA-B*40:06 | MT | SEWLVRT[C]AA  | 99.91  | WT | SEWLVRT[S]AA  | 103.96   | 10 | 2.0913   |
| Se141 | GPATCH2L S452C | HLA-B*40:06 | MT | SEWLVRT[C]A   | 211.86 | WT | SEWLVRT[S]A   | 90.99    | 9  | 2.0913   |
| Se141 | SEL1L R600T    | HLA-A*02:01 | MT | FILDQ[T]EASI  | 23.8   | WT | FILDQ[R]EASI  | 92.83    | 10 | 24.19524 |
| Se141 | SEL1L R600T    | HLA-A*02:01 | MT | ILDQ[T]EASIV  | 117.79 | WT | ILDQ[R]EASIV  | 255.64   | 10 | 24.19524 |
| Se141 | SEL1L R600T    | HLA-A*02:01 | MT | ILDQ[T]EASI   | 210.22 | WT | ILDQ[R]EASI   | 433.32   | 9  | 24.19524 |
| Se141 | XRCC3 R81L     | HLA-A*02:01 | MT | Q[Q]LSLGCVPV  | 21.92  | WT | Q[R]LSLGCVPV  | 20756.11 | 9  | 6.67893  |
| Se141 | XRCC3 R81L     | HLA-A*02:01 | MT | Q[Q]LSLGCVPV  | 99.1   | WT | Q[R]LSLGCVPV  | 22222.92 | 10 | 6.67893  |
| Se141 | XRCC3 R81L     | HLA-A*02:01 | MT | [L]LSLGCVPV   | 161.88 | WT | [R]LSLGCVPV   | 249.65   | 9  | 6.67893  |
| Se141 | XRCC3 R81L     | HLA-A*24:02 | MT | RFPTQHQ[R]L   | 220.36 | WT | RFPTQHQ[R]L   | 489.95   | 9  | 6.67893  |
| Se141 | XRCC3 R81L     | HLA-A*02:01 | MT | HQ[Q]LSLGCVPV | 225.1  | WT | HQ[R]LSLGCVPV | 4337.19  | 10 | 6.67893  |
| Se141 | IGF1R R1337H   | HLA-B*15:01 | MT | GVLVL[H]JASF  | 487.42 | WT | GVLVL[R]JASF  | 680.96   | 9  | 33.45439 |
| Se141 | GRIN2A V820I   | HLA-A*02:01 | MT | NMAG[I]FYML   | 9.95   | WT | NMAG[V]FYML   | 9.89     | 9  | 8.47523  |
| Se141 | GRIN2A V820I   | HLA-A*02:01 | MT | NMAG[I]FYMLA  | 41.69  | WT | NMAG[V]FYMLA  | 48.56    | 10 | 8.47523  |
| Se141 | GRIN2A V820I   | HLA-A*02:01 | MT | G[V]FYMLAAA   | 128.81 | WT | G[V]FYMLAAA   | 220.2    | 9  | 8.47523  |
| Se141 | GRIN2A V820I   | HLA-B*15:01 | MT | G[V]FYMLAAAM  | 209.43 | WT | G[V]FYMLAAAM  | 235.4    | 10 | 8.47523  |
| Se141 | TP53 D127Y     | HLA-B*40:06 | MT | LE[D]SSGNLL   | 273.44 | WT | LE[D]SSGNLL   | 2972.21  | 9  | 40.72434 |
| Se141 | TP53 D127Y     | HLA-B*15:01 | MT | ILTIITL[Y]    | 423.15 | WT | ILTIITL[D]    | 33436.8  | 9  | 40.72434 |
| Se141 | RPS6KB1 P412L  | HLA-C*08:01 | MT | FSFEPKIRS[L]  | 465.9  | WT | FSFEPKIRS[P]  | 23447.27 | 10 | 2.1833   |
| Se141 | DHX34 T556A    | HLA-A*02:01 | MT | SLE[A]AILYL   | 56.42  | WT | SLE[T]AILYL   | 112.24   | 9  | 5.25454  |
| Se141 | TRPC4AP T252S  | HLA-B*15:01 | MT | ILAV[S]ISEM   | 112.67 | WT | ILAV[T]ISEM   | 102.23   | 9  | 37.84303 |
| Se141 | TRPC4AP T252S  | HLA-A*02:01 | MT | ILAV[S]ISEM   | 224.99 | WT | ILAV[T]ISEM   | 284.84   | 9  | 37.84303 |
| Se141 | TRPC4AP T252S  | HLA-B*15:01 | MT | RILAV[S]ISEM  | 470.84 | WT | RILAV[T]ISEM  | 577.76   | 10 | 37.84303 |
| Se141 | PRODH G434D    | HLA-B*15:01 | MT | GQA[D]YPVYKY  | 90.86  | WT | GQA[G]YPVYKY  | 84.81    | 10 | 1.01439  |
| Se141 | PRODH G434D    | HLA-B*15:01 | MT | ISFPLGQA[D]Y  | 106.28 | WT | ISFPLGQA[G]Y  | 48.61    | 10 | 1.01439  |
| Se141 | PRPS2 Q156R    | HLA-A*24:02 | MT | LYAEPVAVL[R]W | 47.88  | WT | LYAEPVAVL[Q]W | 45.58    | 10 | 16.28661 |
| Se141 | PRPS2 Q156R    | HLA-A*24:02 | MT | [R]WIRENIAEW  | 87.77  | WT | [Q]WIRENIAEW  | 490.17   | 10 | 16.28661 |
| Se142 | RALGPS2 H482Y  | HLA-C*14:03 | MT | [Y]FKSTSNKNV  | 416.4  | WT | [H]FKSTSNKNV  | 2632.83  | 10 | 7.94037  |
| Se142 | EPAS1 G197A    | HLA-A*02:06 | MT | KVLHCT[A]QV   | 21.65  | WT | KVLHCT[G]QV   | 173.77   | 9  | 15.75932 |
| Se142 | EPAS1 G197A    | HLA-A*02:06 | MT | ATWKVLHCT[A]  | 164.96 | WT | ATWKVLHCT[G]  | 8666.92  | 10 | 15.75932 |
| Se142 | ZDBF2 F1601L   | HLA-A*33:03 | MT | MTNQCKET[L]K  | 353.32 | WT | MTNQCKET[F]K  | 179.79   | 10 | 1.02019  |
| Se142 | ZDBF2 F1601L   | HLA-A*33:03 | MT | ET[L]KIINRK   | 403.12 | WT | ET[F]KIINRK   | 136.4    | 9  | 1.02019  |
| Se142 | MCTP1 H310N    | HLA-A*02:06 | MT | LQLEEGEG[N]L  | 333.61 | WT | LQLEEGEG[H]L  | 231.85   | 10 | 1.62975  |
| Se142 | MCTP1 H310N    | HLA-B*44:03 | MT | GEG[N]LVLLV   | 408.94 | WT | GEG[H]LVLLV   | 595.23   | 9  | 1.62975  |
| Se142 | KDM4C C109F    | HLA-A*33:03 | MT | NSGKY[F]TPR   | 52.35  | WT | NSGKY[C]TPR   | 121.31   | 9  | 8.84102  |
| Se142 | KDM4C C109F    | HLA-C*14:03 | MT | Y[F]TPRYLDY   | 55.99  | WT | Y[C]TPRYLDY   | 1809.31  | 9  | 8.84102  |
| Se142 | KDM4C C109F    | HLA-C*14:03 | MT | KY[F]TPRYLDY  | 127.98 | WT | KY[C]TPRYLDY  | 1425.9   | 10 | 8.84102  |
| Se142 | KDM4C C109F    | HLA-A*33:03 | MT | ANSGBK[F]TPR  | 217.38 | WT | ANSGBK[C]TPR  | 541.52   | 10 | 8.84102  |
| Se142 | GNAQ T96S      | HLA-A*02:06 | MT | AMIRAMD[S]L   | 67.06  | WT | AMIRAMD[T]L   | 103.18   | 9  | 10.62602 |
| Se142 | GNAQ T96S      | HLA-A*33:03 | MT | MIRAMD[S]LK   | 300.92 | WT | MIRAMD[T]LK   | 381.75   | 9  | 10.62602 |
| Se142 | GNAQ T96S      | HLA-C*14:03 | MT | RAMD[S]LKIPY  | 370.48 | WT | RAMD[T]LKIPY  | 347.14   | 10 | 10.62602 |
| Se142 | FRMD4A G887R   | HLA-A*33:03 | MT | LFKESWRGG[R]  | 66.96  | WT | LFKESWRGG[G]  | 32184.44 | 10 | 2.72038  |
| Se142 | SPATA13 E174K  | HLA-B*44:03 | MT | REIMDT[K]RVY  | 117.17 | WT | REIMDT[E]RVY  | 98.99    | 10 | 6.32587  |
| Se142 | SPATA13 E174K  | HLA-A*33:03 | MT | VIREIMDT[K]R  | 206.99 | WT | VIREIMDT[E]R  | 209.48   | 10 | 6.32587  |
| Se142 | MCF2L F806L    | HLA-A*02:06 | MT | LLMQGS[L]SV   | 8.88   | WT | LLMQGS[F]SV   | 3.01     | 9  | 2.60709  |
| Se142 | MCF2L F806L    | HLA-A*02:06 | MT | KLLMQGS[L]SV  | 45.1   | WT | KLLMQGS[F]SV  | 13.57    | 10 | 2.60709  |
| Se142 | MCF2L F806L    | HLA-A*33:03 | MT | S[L]SVWTDHKR  | 209.49 | WT | S[F]SVWTDHKR  | 63.85    | 10 | 2.60709  |
| Se142 | MCF2L F806L    | HLA-A*33:03 | MT | [L]SVWTDHKR   | 483.93 | WT | [F]SVWTDHKR   | 119.8    | 9  | 2.60709  |
| Se142 | AP1G1 R35Q     | HLA-A*33:03 | MT | CAAI[Q]SSFR   | 47.79  | WT | CAAI[R]SSFR   | 19.18    | 9  | 13.11108 |
| Se142 | AP1G1 R35Q     | HLA-A*33:03 | MT | ECAA[Q]SSFR   | 83.22  | WT | ECAA[R]SSFR   | 40.52    | 10 | 13.11108 |
| Se142 | AP1G1 R35Q     | HLA-B*44:03 | MT | KECAA[Q]SSF   | 123.18 | WT | KECAA[R]SSF   | 274.13   | 10 | 13.11108 |
| Se142 | TP53 R141C     | HLA-A*33:03 | MT | EV[C]VCACPR   | 94.8   | WT | EV[R]VCACPR   | 62.63    | 10 | 50.43608 |
| Se142 | PIK3C3 S180L   | HLA-C*14:03 | MT | VYEEKDGDE[L]  | 35.07  | WT | VYEEKDGDE[S]  | 4107.78  | 10 | 3.7593   |
| Se142 | PIK3C3 S180L   | HLA-C*14:03 | MT | YEEKDGDE[L]   | 130.26 | WT | YEEKDGDE[S]   | 12409.04 | 9  | 3.7593   |
| Se142 | PIK3C3 S180L   | HLA-B*44:03 | MT | DE[L]SPILTSF  | 139.94 | WT | DE[S]SPILTSF  | 132      | 10 | 3.7593   |
| Se142 | ZNF430 K149R   | HLA-A*02:06 | MT | LQLRTGC[R]JSV | 201.9  | WT | LQLRTGC[K]JSV | 255.02   | 10 | 3.72201  |
| Se142 | YDJC A148P     | HLA-A*14:03 | MT | VF[P]JEALQAY  | 181.84 | WT | VF[A]JEALQAY  | 124.93   | 9  | 8.82367  |
| Se142 | YDJC A148P     | HLA-A*02:06 | MT | GVCQVF[P]EA   | 400.45 | WT | GVCQVF[A]EA   | 430.54   | 9  | 8.82367  |
| Se142 | PANX2 V379D    | HLA-C*14:03 | MT | MYDNV[D]RQLL  | 34.12  | WT | MYDNV[V]RQLL  | 14.02    | 10 | 2.2917   |
| Se142 | PANX2 V379D    | HLA-C*14:03 | MT | MYDNV[D]RQL   | 63.83  | WT | MYDNV[V]RQL   | 19.5     | 9  | 2.2917   |
| Se142 | PANX2 V379D    | HLA-C*14:03 | MT | LMYDNV[DJ]RQL | 164.58 | WT | LMYDNV[V]RQL  | 95.53    | 10 | 2.2917   |
| Se142 | PANX2 V379D    | HLA-A*02:06 | MT | LMYDNV[DJ]RQL | 190.32 | WT | LMYDNV[V]RQL  | 87.16    | 10 | 2.2917   |
| Se142 | PANX2 V379D    | HLA-A*33:03 | MT | DLMYDNV[DJ]R  | 345.81 | WT | DLMYDNV[V]R   | 120.14   | 9  | 2.2917   |
| Se142 | TENM1 S95F     | HLA-C*14:03 | MT | V[F]RHGYQLEM  | 57.06  | WT | V[S]RHGYQLEM  | 854.76   | 10 | 3.2676   |
| Se142 | TENM1 S95F     | HLA-C*14:03 | MT | [F]RHGYQLEM   | 61.18  | WT | [S]RHGYQLEM   | 252.92   | 9  | 3.2676   |

|       |               |             |    |               |        |    |               |          |    |           |
|-------|---------------|-------------|----|---------------|--------|----|---------------|----------|----|-----------|
| Se142 | TENM1 S95F    | HLA-A*33:03 | MT | QTDMSV[F]R    | 79.49  | WT | QTDMSV[S]R    | 248.63   | 9  | 3.2676    |
| Se142 | TENM1 S95F    | HLA-C*14:03 | MT | YQTDMSV[F]    | 95.74  | WT | YQTDMSV[S]    | 10073.04 | 9  | 3.2676    |
| Se142 | TENM1 S95F    | HLA-A*33:03 | MT | YQTDMSV[F]R   | 127.03 | WT | YQTDMSV[S]R   | 483.55   | 10 | 3.2676    |
| Se142 | TENM1 S95F    | HLA-A*02:06 | MT | SV[F]RHGYQL   | 131.11 | WT | SV[S]RHGYQL   | 1435.52  | 9  | 3.2676    |
| Se142 | TENM1 S95F    | HLA-C*14:03 | MT | GYQTDMSV[F]   | 178.54 | WT | GYQTDMSV[S]   | 9428.91  | 10 | 3.2676    |
| Se142 | TENM1 S95F    | HLA-A*02:06 | MT | YQTDMSV[F]    | 315.1  | WT | YQTDMSV[S]    | 5091.64  | 9  | 3.2676    |
| Se143 | MOV10 V417M   | HLA-A*02:89 | MT | F[M]HKVELDRV  | 25.06  | WT | F[V]HKVELDRV  | 448.31   | 10 | 9.59379   |
| Se143 | MOV10 V417M   | HLA-A*02:89 | MT | ITYKGF[M]HKV  | 124.67 | WT | ITYKGF[V]HKV  | 153.25   | 10 | 9.59379   |
| Se143 | MOV10 V417M   | HLA-C*14:02 | MT | TYKGF[M]HKV   | 377.97 | WT | TYKGF[V]HKV   | 403.18   | 9  | 9.59379   |
| Se143 | POLR3GL E190A | HLA-B*40:02 | MT | HE[A]ETDYIM   | 96.89  | WT | HE[E]ETDYIM   | 395.55   | 9  | 22.85753  |
| Se143 | POLR3GL E190A | HLA-B*40:02 | MT | [A]ETDYIMSYF  | 147.46 | WT | [E]ETDYIMSYF  | 1860.6   | 10 | 22.85753  |
| Se143 | ELMOD3 H110P  | HLA-C*14:02 | MT | SFSEALQ[P]F   | 33.79  | WT | SFSEALQ[H]F   | 115.67   | 9  | 3.39618   |
| Se143 | ELMOD3 H110P  | HLA-B*40:02 | MT | SEALQ[P]FQTV  | 74.26  | WT | SEALQ[H]FQTV  | 38.05    | 10 | 3.39618   |
| Se143 | ELMOD3 H110P  | HLA-C*03:04 | MT | ISFSEALQ[P]F  | 90.04  | WT | ISFSEALQ[H]F  | 819.4    | 10 | 3.39618   |
| Se143 | ELMOD3 H110P  | HLA-A*02:89 | MT | ALQ[P]FQTVDL  | 240.83 | WT | ALQ[H]FQTVDL  | 352.92   | 10 | 3.39618   |
| Se143 | ELMOD3 H110P  | HLA-C*14:02 | MT | ISFSEALQ[P]F  | 318.09 | WT | ISFSEALQ[H]F  | 1205.03  | 10 | 3.39618   |
| Se143 | CD8A E108Q    | HLA-C*14:02 | MT | FRR[Q]NEGYF   | 236.28 | WT | FRR[E]NEGYF   | 197.2    | 10 | 1.51466   |
| Se143 | PSD4 G421R    | HLA-B*40:02 | MT | RE[R]GHPQESL  | 67.9   | WT | RE[G]GHPQESL  | 151.42   | 10 | 9.12701   |
| Se143 | PLEKHM3 E634D | HLA-B*40:02 | MT | R[D]YLLQIHL   | 43.1   | WT | R[E]YLLQIHL   | 8.44     | 10 | 1.93664   |
| Se143 | PLEKHM3 E634D | HLA-A*02:89 | MT | RIFPR[D]YLL   | 97.07  | WT | RIFPR[E]YLL   | 122.94   | 9  | 1.93664   |
| Se143 | PLEKHM3 E634D | HLA-B*51:01 | MT | FPR[D]YLLQI   | 207.71 | WT | FPR[E]YLLQI   | 163.75   | 10 | 1.93664   |
| Se143 | PLEKHM3 E634D | HLA-C*14:02 | MT | RIFPR[D]YLL   | 411.35 | WT | RIFPR[E]YLL   | 1016.25  | 9  | 1.93664   |
| Se143 | PTH2R A49D    | HLA-A*26:01 | MT | [D]VAILIYG    | 35.38  | WT | [A]VAILIYG    | 1567.87  | 9  | 2.68203   |
| Se143 | PTH2R A49D    | HLA-A*26:01 | MT | [D]VAILIYG    | 80.38  | WT | [A]VAILIYG    | 3263.8   | 10 | 2.68203   |
| Se143 | PTH2R A49D    | HLA-C*03:04 | MT | YSISFGSL[D]V  | 112.5  | WT | YSISFGSL[A]V  | 16.7     | 10 | 2.68203   |
| Se143 | PTH2R A49D    | HLA-C*03:04 | MT | FGSL[D]VAIL   | 260.36 | WT | FGSL[A]VAIL   | 73.56    | 9  | 2.68203   |
| Se143 | PTH2R A49D    | HLA-C*03:04 | MT | ISFGSL[D]VAI  | 410.59 | WT | ISFGSL[A]VAI  | 239.61   | 10 | 2.68203   |
| Se143 | SST A11G      | HLA-C*03:04 | MT | [G]ALSIVLAL   | 71.31  | WT | [A]ALSIVLAL   | 20.37    | 9  | 366.19666 |
| Se143 | SST A11G      | HLA-C*03:04 | MT | CAL[G]ALSIVL  | 98.52  | WT | CAL[A]ALSIVL  | 96.83    | 10 | 366.19666 |
| Se143 | SST A11G      | HLA-A*02:89 | MT | AL[G]ALSIVL   | 144.86 | WT | AL[A]ALSIVL   | 23.99    | 9  | 366.19666 |
| Se143 | SST A11G      | HLA-A*02:89 | MT | AL[G]ALSIVLA  | 163.9  | WT | AL[A]ALSIVLA  | 40.76    | 10 | 366.19666 |
| Se143 | SST A11G      | HLA-A*02:89 | MT | RLQCAL[G]AL   | 256.82 | WT | RLQCAL[A]AL   | 33.49    | 9  | 366.19666 |
| Se143 | SST A11G      | HLA-B*40:02 | MT | LQCAL[G]ALSI  | 398.46 | WT | LQCAL[A]ALSI  | 347.49   | 10 | 366.19666 |
| Se143 | SST A11G      | HLA-C*03:04 | MT | L[G]ALSIVLAL  | 421.11 | WT | L[A]ALSIVLAL  | 11.99    | 10 | 366.19666 |
| Se143 | PTPN13 A1012E | HLA-B*40:02 | MT | [E]ESLAGVTKL  | 355.44 | WT | [A]ESLAGVTKL  | 39.77    | 10 | 2.24969   |
| Se143 | TENM3 N1582I  | HLA-B*51:01 | MT | MPVRVSPD[I]   | 290.06 | WT | MPVRVSPD[N]   | 22191.11 | 10 | 2.41018   |
| Se143 | SRFBP1 A197S  | HLA-B*40:02 | MT | MEHGPK[S]VTI  | 67.78  | WT | MEHGPK[A]VTI  | 58.33    | 10 | 4.54534   |
| Se143 | PCDHGB4 E359D | HLA-B*40:02 | MT | A[D]LGTHIAL   | 114.89 | WT | A[E]LGTHIAL   | 7.33     | 9  | 21.54735  |
| Se143 | PCDHGB4 E359D | HLA-B*40:02 | MT | A[D]LGTHIAL   | 338.22 | WT | A[E]LGTHIAL   | 16.42    | 10 | 21.54735  |
| Se143 | PCDHGB4 E359D | HLA-B*40:02 | MT | MEDA[D]LGTHI  | 473.29 | WT | MEDA[E]LGTHI  | 375.15   | 10 | 21.54735  |
| Se143 | HECW1 T717M   | HLA-C*03:04 | MT | FASH[M]RFSSV  | 12.46  | WT | FASH[T]RFSSV  | 10.73    | 10 | 1.50199   |
| Se143 | HECW1 T717M   | HLA-C*14:02 | MT | FASH[M]RFSSV  | 168.32 | WT | FASH[T]RFSSV  | 171.97   | 10 | 1.50199   |
| Se143 | HECW1 T717M   | HLA-A*02:89 | MT | FASH[M]RFSSV  | 326.67 | WT | FASH[T]RFSSV  | 389.83   | 10 | 1.50199   |
| Se143 | HECW1 T717M   | HLA-C*14:02 | MT | NRFASH[M]RF   | 416.54 | WT | NRFASH[T]RF   | 444.13   | 9  | 1.50199   |
| Se143 | ZP3 P22H      | HLA-B*40:02 | MT | TELCY[H]QPL   | 9.85   | WT | TELCY[P]QPL   | 16.51    | 9  | 2.60305   |
| Se143 | ZP3 P22H      | HLA-C*14:02 | MT | CY[H]QPLWLL   | 88.12  | WT | CY[P]QPLWLL   | 70.45    | 9  | 2.60305   |
| Se143 | FAM200A S254A | HLA-B*40:02 | MT | KEI[A]PSLMDV  | 48.29  | WT | KEI[S]PSLMDV  | 49.79    | 10 | 8.03525   |
| Se143 | FAM200A S254A | HLA-C*03:04 | MT | LVSKEI[A]PSL  | 170.58 | WT | LVSKEI[S]PSL  | 148.46   | 10 | 8.03525   |
| Se143 | FAM200A S254A | HLA-B*40:02 | MT | REALVSKIE[A]  | 185.64 | WT | REALVSKIE[S]  | 82.79    | 10 | 8.03525   |
| Se143 | FAM200A S254A | HLA-C*03:04 | MT | I[A]PSLMDVL   | 196.44 | WT | I[S]PSLMDVL   | 2115.39  | 9  | 8.03525   |
| Se143 | XPO7 F553S    | HLA-C*03:04 | MT | LAMLS[S]FEQF  | 31.46  | WT | LAMLS[F]FEQF  | 67.3     | 10 | 21.33041  |
| Se143 | XPO7 F553S    | HLA-B*40:02 | MT | LELAML[S]F    | 53.31  | WT | LELAML[F]F    | 131.17   | 9  | 21.33041  |
| Se143 | SPIDR E600Q   | HLA-A*02:89 | MT | LLEQR[E]IWL   | 38.87  | WT | LLEQR[E]IWL   | 49.61    | 10 | 12.69574  |
| Se143 | SPIDR E600Q   | HLA-B*40:02 | MT | LEQR[Q]IWL    | 44.1   | WT | LEQR[E]IWL    | 68.69    | 9  | 12.69574  |
| Se143 | SPIDR E600Q   | HLA-A*02:89 | MT | R[Q]IWLVTDV   | 105.77 | WT | R[E]IWLVTDV   | 879.42   | 10 | 12.69574  |
| Se143 | SPIDR E600Q   | HLA-B*40:02 | MT | LEQR[Q]IWL    | 152.66 | WT | LEQR[E]IWL    | 164.13   | 10 | 12.69574  |
| Se143 | SPIDR E600Q   | HLA-A*02:89 | MT | LLEQR[Q]IWL   | 181.3  | WT | LLEQR[E]IWL   | 233.11   | 10 | 12.69574  |
| Se143 | SPIDR E600Q   | HLA-B*40:02 | MT | R[Q]IWLVTDV   | 190.08 | WT | R[E]IWLVTDV   | 18.01    | 10 | 12.69574  |
| Se143 | RIPK2 R247P   | HLA-C*03:04 | MT | YSVSGQH[P]PV  | 19.23  | WT | YSVSGQH[R]PV  | 33.31    | 10 | 14.65227  |
| Se143 | RIPK2 R247P   | HLA-C*14:02 | MT | YSVSGQH[P]PV  | 253.39 | WT | YSVSGQH[R]PV  | 269.18   | 10 | 14.65227  |
| Se143 | RIPK2 R247P   | HLA-C*03:04 | MT | SVSQGH[P]PV   | 276.8  | WT | SVSQGH[R]PV   | 299.2    | 9  | 14.65227  |
| Se143 | RIPK2 R247P   | HLA-A*02:89 | MT | SVSQGH[P]PV   | 373.88 | WT | SVSQGH[R]PV   | 5436.97  | 9  | 14.65227  |
| Se143 | RIPK2 R247P   | HLA-C*03:04 | MT | SVSQGH[P]PVI  | 496    | WT | SVSQGH[R]PVI  | 819.87   | 10 | 14.65227  |
| Se143 | LRSAM1 R315C  | HLA-A*02:89 | MT | GLSEHQ[C]HL   | 40.69  | WT | GLSEHQ[R]HL   | 503.07   | 9  | 3.68505   |
| Se143 | LRSAM1 R315C  | HLA-B*40:02 | MT | SEHQ[C]HLNA   | 104.18 | WT | SEHQ[R]HLNA   | 332.15   | 9  | 3.68505   |
| Se143 | VSTM4 R299Q   | HLA-B*40:02 | MT | LELIKPH[Q]AA  | 280.13 | WT | LELIKPH[R]AA  | 336.53   | 10 | 1.85453   |
| Se143 | PPP1CA K190Q  | HLA-C*03:04 | MT | FGAEVVA[Q]JFL | 72.58  | WT | FGAEVVA[K]JFL | 246.51   | 10 | 71.07127  |
| Se143 | PPP1CA K190Q  | HLA-C*03:04 | MT | FGAEVVA[Q]JF  | 119.13 | WT | FGAEVVA[K]JF  | 410.18   | 9  | 71.07127  |
| Se143 | PPP1CA K190Q  | HLA-C*14:02 | MT | FGAEVVA[Q]JF  | 269.44 | WT | FGAEVVA[K]JF  | 329.22   | 9  | 71.07127  |
| Se143 | PPP1CA K190Q  | HLA-B*40:02 | MT | A[Q]JFLHKHDL  | 373.4  | WT | A[K]JFLHKHDL  | 4407.74  | 9  | 71.07127  |
| Se143 | PPP1CA K190Q  | HLA-C*14:02 | MT | FGAEVVA[Q]JFL | 431.63 | WT | FGAEVVA[K]JFL | 1210.16  | 10 | 71.07127  |
| Se143 | PPP1CA K190Q  | HLA-A*26:01 | MT | EVVA[Q]JFLHKH | 441.84 | WT | EVVA[K]JFLHKH | 588.99   | 10 | 71.07127  |
| Se143 | EXPH5 A890E   | HLA-B*40:02 | MT | S[E]NECSKVL   | 75.05  | WT | S[A]NECSKVL   | 27651.3  | 9  | 1.17434   |
| Se143 | MON2 P453R    | HLA-B*40:02 | MT | FEYRGTWI[R]I  | 23.5   | WT | FEYRGTWI[P]I  | 7.51     | 10 | 4.44956   |
| Se143 | MON2 P453R    | HLA-C*14:02 | MT | YRGTWI[R]I    | 110.99 | WT | YRGTWI[P]I    | 191.71   | 9  | 4.44956   |
| Se143 | MON2 P453R    | HLA-C*14:02 | MT | EYRGTWI[R]I   | 306.43 | WT | EYRGTWI[P]I   | 260.97   | 10 | 4.44956   |
| Se143 | SBNO1 P220A   | HLA-C*14:02 | MT | SFSPTMKV[A]V  | 300.37 | WT | SFSPTMKV[P]V  | 282.43   | 10 | 16.09248  |
| Se143 | AJUBA D27E    | HLA-A*02:89 | MT | FTV[E]FSNQV   | 20.64  | WT | FTV[D]FSNQV   | 18.28    | 9  | 7.23468   |

|       |                |             |    |               |        |    |               |          |    |          |
|-------|----------------|-------------|----|---------------|--------|----|---------------|----------|----|----------|
| Se143 | AJUBA D27E     | HLA-A*26:01 | MT | FTV[E]FSNQVY  | 29.97  | WT | FTV[D]FSNQVY  | 29.88    | 10 | 7.23468  |
| Se143 | AJUBA D27E     | HLA-B*40:02 | MT | V[E]FSNQVYCV  | 61.83  | WT | V[D]FSNQVYCV  | 1221.96  | 10 | 7.23468  |
| Se143 | AJUBA D27E     | HLA-C*03:04 | MT | FTV[E]FSNQV   | 184.05 | WT | FTV[D]FSNQV   | 125.09   | 9  | 7.23468  |
| Se143 | AJUBA D27E     | HLA-C*03:04 | MT | FTV[E]FSNQVY  | 211.74 | WT | FTV[D]FSNQVY  | 185.49   | 10 | 7.23468  |
| Se143 | AJUBA D27E     | HLA-C*14:02 | MT | FTV[E]FSNQVY  | 326.75 | WT | FTV[D]FSNQVY  | 318.44   | 10 | 7.23468  |
| Se143 | NUBPL K65E     | HLA-B*40:02 | MT | C[E]HKTHIFGA  | 218.38 | WT | C[K]HKTHIFGA  | 11826.7  | 10 | 4.20495  |
| Se143 | CEP170B P1503L | HLA-C*03:04 | MT | RASCGP[L]SL   | 23.64  | WT | RASCGP[P]SL   | 47.67    | 9  | 11.3442  |
| Se143 | CEP170B P1503L | HLA-C*03:04 | MT | FPQRASCGP[L]  | 231.85 | WT | FPQRASCGP[P]  | 27062.24 | 10 | 11.3442  |
| Se143 | CEP170B P1503L | HLA-C*03:04 | MT | [L]SLPDPFTL   | 270.23 | WT | [P]SLPDPFTL   | 9654.95  | 9  | 11.3442  |
| Se143 | CEP170B P1503L | HLA-C*14:02 | MT | RASCGP[L]SL   | 418.84 | WT | RASCGP[P]SL   | 808.4    | 9  | 11.3442  |
| Se143 | ATP10A A804V   | HLA-C*03:04 | MT | Y[V]AEGLRTL   | 5.45   | WT | Y[A]AEGLRTL   | 2.53     | 9  | 2.38668  |
| Se143 | ATP10A A804V   | HLA-A*02:89 | MT | YLNVDY[V]AEGL | 13.28  | WT | YLNVDY[A]AEGL | 19.52    | 10 | 2.38668  |
| Se143 | ATP10A A804V   | HLA-C*14:02 | MT | Y[V]AEGLRTL   | 18.76  | WT | Y[A]AEGLRTL   | 19.17    | 9  | 2.38668  |
| Se143 | ATP10A A804V   | HLA-C*14:02 | MT | VY[V]AEGLRTL  | 31.79  | WT | VY[A]AEGLRTL  | 20.31    | 10 | 2.38668  |
| Se143 | ATP10A A804V   | HLA-A*02:89 | MT | Y[V]AEGLRTL   | 58.27  | WT | Y[A]AEGLRTL   | 768.75   | 9  | 2.38668  |
| Se143 | ATP10A A804V   | HLA-A*02:89 | MT | KTQNYLNVY[V]  | 170.31 | WT | KTQNYLNVY[A]  | 2173.47  | 10 | 2.38668  |
| Se143 | ATP10A A804V   | HLA-A*02:89 | MT | TQNYLNVY[V]   | 196.31 | WT | TQNYLNVY[A]   | 3291.76  | 9  | 2.38668  |
| Se143 | ATP10A A804V   | HLA-C*03:04 | MT | YLNVDY[V]AEGL | 313.37 | WT | YLNVDY[A]AEGL | 210.79   | 10 | 2.38668  |
| Se143 | ATP10A A804V   | HLA-A*26:01 | MT | Y[V]AEGLRTL   | 364.76 | WT | Y[A]AEGLRTL   | 2812.12  | 9  | 2.38668  |
| Se143 | ACSF3 R53H     | HLA-A*02:89 | MT | FL[H]AVCEEKI  | 58.93  | WT | FL[R]AVCEEKI  | 351.39   | 10 | 2.95719  |
| Se143 | ACSF3 R53H     | HLA-C*03:04 | MT | HAQDFL[H]AV   | 216.29 | WT | HAQDFL[R]AV   | 299.68   | 9  | 2.95719  |
| Se143 | ACSF3 R53H     | HLA-A*02:89 | MT | HAQDFL[H]AV   | 481.83 | WT | HAQDFL[R]AV   | 4546.22  | 9  | 2.95719  |
| Se143 | TP53 M105I     | HLA-C*14:02 | MT | YNY[I]CNSSCM  | 70.63  | WT | YNY[M]CNSSCM  | 37.88    | 10 | 29.45133 |
| Se143 | TP53 M105I     | HLA-C*14:02 | MT | NY[I]CNSSCM   | 82.33  | WT | NY[M]CNSSCM   | 35.65    | 9  | 29.45133 |
| Se143 | TP53 M105I     | HLA-C*03:04 | MT | YNY[I]CNSSCM  | 299.55 | WT | YNY[M]CNSSCM  | 134.49   | 10 | 29.45133 |
| Se143 | RNF213 C4348W  | HLA-C*03:04 | MT | KAVLE[W]KPL   | 242.85 | WT | KAVLE[C]KPL   | 333.42   | 9  | 12.25829 |
| Se143 | RNF213 C4348W  | HLA-B*40:02 | MT | LE[W]KPLGIKT  | 270.04 | WT | LE[C]KPLGIKT  | 1682.25  | 10 | 12.25829 |
| Se143 | RNF213 C4348W  | HLA-A*02:89 | MT | AVLE[W]KPLGI  | 413.95 | WT | AVLE[C]KPLGI  | 993.7    | 10 | 12.25829 |
| Se143 | COLGALT1 A189V | HLA-B*40:02 | MT | AENKTVV[V]PM  | 19     | WT | AENKTVV[A]PM  | 23.23    | 10 | 40.84382 |
| Se143 | COLGALT1 A189V | HLA-A*02:89 | MT | LIAENKTVV[V]  | 346.75 | WT | LIAENKTVV[A]  | 3477.18  | 10 | 40.84382 |
| Se143 | ZBTB45 H8Y     | HLA-B*40:02 | MT | AEAV[Y]HHHL   | 16.87  | WT | AEAV[H]HHHL   | 24.28    | 9  | 5.63241  |
| Se143 | ZBTB45 H8Y     | HLA-C*14:02 | MT | V[Y]HHHLQNF   | 73.79  | WT | V[H]HHHLQNF   | 1248.52  | 9  | 5.63241  |
| Se143 | ZBTB45 H8Y     | HLA-C*03:04 | MT | MAAAEAV[Y]HI  | 77.51  | WT | MAAAEAV[H]HI  | 79.1     | 10 | 5.63241  |
| Se143 | ZBTB45 H8Y     | HLA-C*03:04 | MT | AAAEAV[Y]HI   | 261.08 | WT | AAAEAV[H]HI   | 188.6    | 9  | 5.63241  |
| Se143 | ZBTB45 H8Y     | HLA-B*51:01 | MT | MAAAEAV[Y]HI  | 457.95 | WT | MAAAEAV[H]HI  | 493.45   | 10 | 5.63241  |
| Se143 | ITCH P456A     | HLA-A*02:89 | MT | FLLSHEVLN[A]  | 8.9    | WT | FLLSHEVLN[P]  | 548.41   | 10 | 13.46458 |
| Se143 | ITCH P456A     | HLA-A*02:89 | MT | [A]MYCLFEYA   | 9.47   | WT | [P]MYCLFEYA   | 829.64   | 9  | 13.46458 |
| Se143 | ITCH P456A     | HLA-B*40:02 | MT | HEVLN[A]MYCL  | 32.13  | WT | HEVLN[P]MYCL  | 51.35    | 10 | 13.46458 |
| Se143 | ITCH P456A     | HLA-C*03:04 | MT | LSHEVLN[A]M   | 51.79  | WT | LSHEVLN[P]M   | 35.8     | 9  | 13.46458 |
| Se143 | ITCH P456A     | HLA-A*26:01 | MT | EVLN[A]MYCLF  | 138.74 | WT | EVLN[P]MYCLF  | 237.38   | 10 | 13.46458 |
| Se143 | ITCH P456A     | HLA-A*02:89 | MT | LLSHEVLN[A]   | 147.31 | WT | LLSHEVLN[P]   | 10424.53 | 9  | 13.46458 |
| Se143 | ITCH P456A     | HLA-A*02:89 | MT | LLSHEVLN[A]M  | 205.41 | WT | LLSHEVLN[P]M  | 119.13   | 10 | 13.46458 |
| Se143 | ITCH P456A     | HLA-C*03:04 | MT | LLSHEVLN[A]M  | 350.06 | WT | LLSHEVLN[P]M  | 233.64   | 10 | 13.46458 |
| Se143 | RBL1 S1011F    | HLA-C*14:02 | MT | LYKFNKSP[F]   | 15.97  | WT | LYKFNKSP[S]   | 1824.29  | 9  | 2.07907  |
| Se143 | RBL1 S1011F    | HLA-C*03:04 | MT | LLYKFNKSP[F]  | 214.62 | WT | LLYKFNKSP[S]  | 11073.31 | 10 | 2.07907  |
| Se143 | RBL1 S1011F    | HLA-C*14:02 | MT | KFNKSP[F]KSL  | 225.88 | WT | KFNKSP[S]KSL  | 276.46   | 10 | 2.07907  |
| Se143 | RBL1 S1011F    | HLA-C*14:02 | MT | LLYKFNKSP[F]  | 240.73 | WT | LLYKFNKSP[S]  | 9099.13  | 10 | 2.07907  |
| Se143 | C22orf39 H68D  | HLA-A*02:89 | MT | FL[H]HYVYVHG  | 452.69 | WT | FL[H]HYVYVHG  | 1509     | 9  | 7.24986  |
| Se143 | MED12 A1137V   | HLA-C*03:04 | MT | VAILI[V]RQCL  | 180.58 | WT | VAILI[A]RQCL  | 125.7    | 10 | 3.90178  |
| Se143 | MED12 A1137V   | HLA-A*02:89 | MT | ILI[V]RQCLL   | 292.8  | WT | ILI[A]RQCLL   | 80.69    | 10 | 3.90178  |
| Se143 | MED12 A1137V   | HLA-A*02:89 | MT | ILI[V]RQCLL   | 378.73 | WT | ILI[A]RQCLL   | 85.8     | 9  | 3.90178  |
| Se144 | CYP4B1 D359V   | HLA-A*02:06 | MT | FQWD[V]LGKM   | 26.53  | WT | FQWD[D]LGKM   | 29.91    | 9  | 3.9696   |
| Se144 | CYP4B1 D359V   | HLA-A*02:01 | MT | FQWD[V]LGKM   | 173.82 | WT | FQWD[D]LGKM   | 285.6    | 9  | 3.9696   |
| Se144 | CYP4B1 D359V   | HLA-A*02:06 | MT | FQWD[V]LGKMT  | 204.24 | WT | FQWD[D]LGKMT  | 198.63   | 10 | 3.9696   |
| Se144 | ADGRL4 I163V   | HLA-A*02:06 | MT | LSPTDIITY[V]  | 100.87 | WT | LSPTDIITY[I]  | 739.14   | 10 | 3.86682  |
| Se144 | ADGRL4 I163V   | HLA-B*54:01 | MT | SPTDIITY[V]   | 205.73 | WT | SPTDIITY[I]   | 828.08   | 9  | 3.86682  |
| Se144 | VCAM1 R407K    | HLA-B*15:01 | MT | KQ[K]QSTQTLY  | 29.48  | WT | KQ[R]QSTQTLY  | 22.45    | 10 | 2.77807  |
| Se144 | VCAM1 R407K    | HLA-A*02:06 | MT | [K]QSTQTLYV   | 33.91  | WT | [R]QSTQTLYV   | 63.24    | 9  | 2.77807  |
| Se144 | VCAM1 R407K    | HLA-A*02:01 | MT | [K]QSTQTLYV   | 132.28 | WT | [R]QSTQTLYV   | 356.45   | 9  | 2.77807  |
| Se144 | VCAM1 R407K    | HLA-B*15:01 | MT | KQ[K]QSTQTL   | 147.52 | WT | KQ[R]QSTQTL   | 104.67   | 9  | 2.77807  |
| Se144 | IGSF3 R805C    | HLA-A*02:01 | MT | KLAEEVSG[C]   | 231.6  | WT | KLAEEVSG[R]   | 9703.65  | 9  | 3.40232  |
| Se144 | IGSF3 R805C    | HLA-A*02:06 | MT | KLAEEVSG[C]   | 451.16 | WT | KLAEEVSG[R]   | 9606.5   | 9  | 3.40232  |
| Se144 | RGS16 A78V     | HLA-B*15:01 | MT | SSKNGVA[V]F   | 21     | WT | SSKNGVA[A]F   | 22.13    | 9  | 4.26263  |
| Se144 | RGS16 A78V     | HLA-B*15:01 | MT | LSSKNGVA[V]F  | 22.17  | WT | LSSKNGVA[A]F  | 22.56    | 10 | 4.26263  |
| Se144 | RGS16 A78V     | HLA-C*03:03 | MT | LSSKNGVA[V]F  | 70.65  | WT | LSSKNGVA[A]F  | 40.39    | 10 | 4.26263  |
| Se144 | RGS16 A78V     | HLA-A*02:01 | MT | LSSKNGVA[V]   | 131.98 | WT | LSSKNGVA[A]   | 1295.94  | 10 | 4.26263  |
| Se144 | RGS16 A78V     | HLA-C*03:03 | MT | LSSKNGVA[V]   | 177.17 | WT | LSSKNGVA[A]   | 1359.24  | 9  | 4.26263  |
| Se144 | RGS16 A78V     | HLA-A*02:06 | MT | GVA[V]FHAFL   | 341.71 | WT | GVA[A]FHAFL   | 80.46    | 9  | 4.26263  |
| Se144 | RGS16 A78V     | HLA-A*02:06 | MT | LSSKNGVA[V]   | 371.13 | WT | LSSKNGVA[A]   | 2405.12  | 10 | 4.26263  |
| Se144 | CAD G485A      | HLA-C*03:03 | MT | TALNC[A]VEL   | 24.29  | WT | TALNC[G]VEL   | 28.08    | 9  | 4.59739  |
| Se144 | CAD G485A      | HLA-A*02:06 | MT | GQTALNC[A]V   | 231.56 | WT | GQTALNC[G]V   | 237.61   | 9  | 4.59739  |
| Se144 | CAD G485A      | HLA-C*03:03 | MT | QTALNC[A]VEL  | 328.7  | WT | QTALNC[G]VEL  | 551.22   | 10 | 4.59739  |
| Se144 | THADA C1042Y   | HLA-A*02:06 | MT | KT[Y]DVTAQMV  | 30.41  | WT | KT[C]DVTAQMV  | 189.52   | 10 | 2.98152  |
| Se144 | THADA C1042Y   | HLA-C*03:03 | MT | KT[Y]DVTAQMV  | 74.94  | WT | KT[C]DVTAQMV  | 1217.39  | 9  | 2.98152  |
| Se144 | THADA C1042Y   | HLA-A*02:01 | MT | KT[Y]DVTAQMV  | 103.53 | WT | KT[C]DVTAQMV  | 1209.53  | 10 | 2.98152  |
| Se144 | THADA C1042Y   | HLA-A*02:06 | MT | KT[Y]DVTAQMV  | 277.2  | WT | KT[C]DVTAQMV  | 1382.26  | 9  | 2.98152  |
| Se144 | THADA C1042Y   | HLA-B*15:01 | MT | KT[Y]DVTAQMV  | 488.62 | WT | KT[C]DVTAQMV  | 1069.84  | 9  | 2.98152  |
| Se144 | TMBIM1 A118T   | HLA-A*02:06 | MT | [T]IFTFVEPV   | 5.21   | WT | [A]IFTFVEPV   | 3.73     | 9  | 84.44829 |

|       |                |             |    |               |        |    |               |          |    |          |
|-------|----------------|-------------|----|---------------|--------|----|---------------|----------|----|----------|
| Se144 | TMBIM1 A118T   | HLA-A*02:06 | MT | AII[T]IFTFV   | 5.62   | WT | AII[A]IFTFV   | 4.29     | 9  | 84.44829 |
| Se144 | TMBIM1 A118T   | HLA-A*02:06 | MT | I[T]IFTFVEPV  | 6.88   | WT | I[A]IFTFVEPV  | 15.96    | 10 | 84.44829 |
| Se144 | TMBIM1 A118T   | HLA-A*02:01 | MT | [T]IFTFVEPV   | 7.39   | WT | [A]IFTFVEPV   | 4.24     | 9  | 84.44829 |
| Se144 | TMBIM1 A118T   | HLA-A*02:01 | MT | AII[T]IFTFV   | 12.57  | WT | AII[A]IFTFV   | 8        | 9  | 84.44829 |
| Se144 | TMBIM1 A118T   | HLA-A*02:06 | MT | V AII[T]IFTFV | 48.76  | WT | V AII[A]IFTFV | 41.54    | 10 | 84.44829 |
| Se144 | TMBIM1 A118T   | HLA-A*02:01 | MT | I[T]IFTFVEPV  | 61.89  | WT | I[A]IFTFVEPV  | 203.72   | 10 | 84.44829 |
| Se144 | TMBIM1 A118T   | HLA-A*02:01 | MT | LLITV AII[T]I | 70.26  | WT | LLITV AII[A]I | 53.96    | 10 | 84.44829 |
| Se144 | TMBIM1 A118T   | HLA-B*15:01 | MT | ITV AII[T]IF  | 166.53 | WT | ITV AII[A]IF  | 175.47   | 9  | 84.44829 |
| Se144 | TMBIM1 A118T   | HLA-B*15:01 | MT | V AII[T]IFTF  | 212.56 | WT | V AII[A]IFTF  | 270.11   | 9  | 84.44829 |
| Se144 | TMBIM1 A118T   | HLA-C*03:03 | MT | V AII[T]IFTF  | 226.57 | WT | V AII[A]IFTF  | 244.31   | 9  | 84.44829 |
| Se144 | TMBIM1 A118T   | HLA-A*02:06 | MT | LLITV AII[T]I | 231.99 | WT | LLITV AII[A]I | 144.46   | 10 | 84.44829 |
| Se144 | TMBIM1 A118T   | HLA-A*02:01 | MT | V AII[T]IFTFV | 363.75 | WT | V AII[A]IFTFV | 387.25   | 10 | 84.44829 |
| Se144 | TMBIM1 A118T   | HLA-C*03:03 | MT | I[T]IFTFVEPV  | 452.54 | WT | I[A]IFTFVEPV  | 35.29    | 10 | 84.44829 |
| Se144 | TMBIM1 A118T   | HLA-B*15:01 | MT | LITV AII[T]IF | 491.36 | WT | LITV AII[A]IF | 421.41   | 10 | 84.44829 |
| Se144 | DZIP3 R357T    | HLA-C*03:03 | MT | GASY[T]KLISL  | 460.92 | WT | GASY[R]KLISL  | 851.24   | 10 | 7.01772  |
| Se144 | WWC2 E325V     | HLA-C*03:03 | MT | RSMANLK[I]V[L | 148.38 | WT | RSMANLK[I]E]L | 134.57   | 10 | 2.88214  |
| Se144 | WWC2 E325V     | HLA-A*02:01 | MT | SMANLKI[V]L   | 221.67 | WT | SMANLKI[E]L   | 90.14    | 9  | 2.88214  |
| Se144 | WWC2 E325V     | HLA-A*02:06 | MT | RSMANLK[I]V   | 313.25 | WT | RSMANLK[I]E   | 24970.79 | 9  | 2.88214  |
| Se144 | WWC2 E325V     | HLA-B*15:01 | MT | SMANLKI[V]L   | 338.52 | WT | SMANLKI[E]L   | 1375.11  | 9  | 2.88214  |
| Se144 | WWC2 E325V     | HLA-A*02:06 | MT | I[V]LSKLDSEA  | 407.34 | WT | I[E]LSKLDSEA  | 17192.9  | 10 | 2.88214  |
| Se144 | SLF1 K20N      | HLA-A*02:01 | MT | KMEE[N]EALV   | 62.29  | WT | KMEE[K]EALV   | 86.17    | 9  | 2.47776  |
| Se144 | SLF1 K20N      | HLA-A*02:06 | MT | KMEE[N]EALV   | 179.98 | WT | KMEE[K]EALV   | 339.79   | 9  | 2.47776  |
| Se144 | SLF1 K20N      | HLA-A*02:06 | MT | FKMEE[N]EALV  | 410.25 | WT | FKMEE[K]EALV  | 1225.28  | 10 | 2.47776  |
| Se144 | ZNF354B K364Q  | HLA-B*15:01 | MT | F[Q]SSSSLRY   | 20.24  | WT | F[K]SSSSLRY   | 864.92   | 9  | 3.77768  |
| Se144 | ZNF354B K364Q  | HLA-C*03:03 | MT | NTF[Q]SSSSL   | 70.51  | WT | NTF[K]SSSSL   | 85.69    | 9  | 3.77768  |
| Se144 | PHACTR1 S50Y   | HLA-B*15:01 | MT | LLPPTLMAA[Y]  | 56.68  | WT | LLPPTLMAA[S]  | 12105.63 | 10 | 1.00749  |
| Se144 | PHACTR1 S50Y   | HLA-A*02:01 | MT | LMAA[Y]SEDDI  | 294.26 | WT | LMAA[S]SEDDI  | 683.38   | 10 | 1.00749  |
| Se144 | EGFL8 G233A    | HLA-C*03:03 | MT | A[A]AWVRAVL   | 27.12  | WT | A[G]AWVRAVL   | 1764.39  | 9  | 3.47587  |
| Se144 | EGFL8 G233A    | HLA-A*02:06 | MT | GQA[A]AWVRAV  | 30.28  | WT | GQA[G]AWVRAV  | 23.8     | 10 | 3.47587  |
| Se144 | EGFL8 G233A    | HLA-C*03:03 | MT | QA[A]AWVRAVL  | 31.93  | WT | QA[G]AWVRAVL  | 425.68   | 10 | 3.47587  |
| Se144 | EGFL8 G233A    | HLA-A*02:06 | MT | [A]AWVRAVLPV  | 73.42  | WT | [G]AWVRAVLPV  | 166.06   | 10 | 3.47587  |
| Se144 | EGFL8 G233A    | HLA-C*03:03 | MT | QA[A]AWVRAV   | 115.37 | WT | QA[G]AWVRAV   | 1395.35  | 9  | 3.47587  |
| Se144 | EGFL8 G233A    | HLA-C*03:03 | MT | [A]AWVRAVLPV  | 123.11 | WT | [G]AWVRAVLPV  | 577.32   | 10 | 3.47587  |
| Se144 | EGFL8 G233A    | HLA-A*02:06 | MT | GQA[A]AWVRA   | 226.42 | WT | GQA[G]AWVRA   | 128.03   | 9  | 3.47587  |
| Se144 | EGFL8 G233A    | HLA-A*02:01 | MT | GQA[A]AWVRAV  | 297.65 | WT | GQA[G]AWVRAV  | 232.77   | 10 | 3.47587  |
| Se144 | EGFL8 G233A    | HLA-A*02:06 | MT | QA[A]AWVRAV   | 361.45 | WT | QA[G]AWVRAV   | 1986.78  | 9  | 3.47587  |
| Se144 | EGFL8 G233A    | HLA-A*02:01 | MT | [A]AWVRAVLPV  | 433.33 | WT | [G]AWVRAVLPV  | 748.84   | 10 | 3.47587  |
| Se144 | EGFL8 G233A    | HLA-B*15:01 | MT | GQA[A]AWVRAV  | 458.76 | WT | GQA[G]AWVRAV  | 698.85   | 10 | 3.47587  |
| Se144 | PKHD1L1 G1179C | HLA-B*15:01 | MT | LLTSLSGF[C]F  | 353.14 | WT | LLTSLSGF[G]F  | 345.58   | 9  | 1.18398  |
| Se144 | FBXW5 C114Y    | HLA-B*15:01 | MT | YQFASCSD[Y]   | 23.22  | WT | YQFASCSD[C]   | 5174.76  | 10 | 33.95253 |
| Se144 | FBXW5 C114Y    | HLA-C*03:03 | MT | FASCSD[Y]TV   | 45.62  | WT | FASCSD[C]TV   | 47.6     | 10 | 33.95253 |
| Se144 | FBXW5 C114Y    | HLA-C*03:03 | MT | [Y]TVKIWSNDL  | 85.9   | WT | [C]TVKIWSNDL  | 3702.43  | 10 | 33.95253 |
| Se144 | FBXW5 C114Y    | HLA-A*02:06 | MT | FASCSD[Y]TV   | 110.85 | WT | FASCSD[C]TV   | 521.76   | 10 | 33.95253 |
| Se144 | FBXW5 C114Y    | HLA-A*02:06 | MT | [Y]TVKIWSNDL  | 256.1  | WT | [C]TVKIWSNDL  | 1931.09  | 10 | 33.95253 |
| Se144 | FBXW5 C114Y    | HLA-A*02:01 | MT | FASCSD[Y]TV   | 462.92 | WT | FASCSD[C]TV   | 2536.76  | 10 | 33.95253 |
| Se144 | NMT2 P126L     | HLA-A*02:06 | MT | YQFWDTQ[L]V   | 2.82   | WT | YQFWDTQ[P]V   | 1.86     | 9  | 2.09485  |
| Se144 | NMT2 P126L     | HLA-A*02:01 | MT | YQFWDTQ[L]V   | 5.34   | WT | YQFWDTQ[P]V   | 3        | 9  | 2.09485  |
| Se144 | NMT2 P126L     | HLA-A*02:06 | MT | Q[L]VPKLDEV   | 24.03  | WT | Q[P]VPKLDEV   | 6610.29  | 9  | 2.09485  |
| Se144 | NMT2 P126L     | HLA-A*02:01 | MT | Q[L]VPKLDEV   | 30.84  | WT | Q[P]VPKLDEV   | 21007.34 | 9  | 2.09485  |
| Se144 | NMT2 P126L     | HLA-A*02:06 | MT | TQ[L]VPKLDEV  | 121.87 | WT | TQ[P]VPKLDEV  | 936.17   | 10 | 2.09485  |
| Se144 | CHD4 K1184E    | HLA-A*02:06 | MT | [E]MMLTHLVV   | 262.43 | WT | [K]MMLTHLVV   | 49.1     | 9  | 59.51367 |
| Se144 | CHD4 K1184E    | HLA-A*02:01 | MT | [E]MMLTHLVV   | 326.36 | WT | [K]MMLTHLVV   | 19.16    | 9  | 59.51367 |
| Se144 | CHD4 K1184E    | HLA-A*02:06 | MT | K[E]MMLTHLV   | 404.9  | WT | K[K]MMLTHLV   | 758.26   | 9  | 59.51367 |
| Se144 | PRSS21 Q252E   | HLA-A*02:06 | MT | Y[E]IGVVSXGV  | 41.3   | WT | Y[Q]IGVVSXGV  | 1.79     | 10 | 11.40713 |
| Se144 | PRSS21 Q252E   | HLA-A*02:01 | MT | GLWY[E]IGVV   | 78.81  | WT | GLWY[Q]IGVV   | 88.48    | 9  | 11.40713 |
| Se144 | PRSS21 Q252E   | HLA-A*02:06 | MT | GLWY[E]IGVV   | 366.59 | WT | GLWY[Q]IGVV   | 411.09   | 9  | 11.40713 |
| Se144 | PRSS21 Q252E   | HLA-A*02:01 | MT | Y[E]IGVVSXGV  | 381.57 | WT | Y[Q]IGVVSXGV  | 2.66     | 10 | 11.40713 |
| Se144 | BFAR E75G      | HLA-A*02:06 | MT | [G]KWEGFPKV   | 294.34 | WT | [E]KWEGFPKV   | 4024.58  | 9  | 21.14457 |
| Se144 | ARHGDI A V204L | HLA-C*03:03 | MT | SADRPS[L]PL   | 31.49  | WT | SADRPS[V]PL   | 38.5     | 9  | 83.94252 |
| Se144 | ARHGDI A V204L | HLA-C*03:03 | MT | QSADRPS[L]PL  | 70.81  | WT | QSADRPS[V]PL  | 75.76    | 10 | 83.94252 |
| Se144 | ARHGDI A V204L | HLA-A*02:06 | MT | YQSADRPS[L]   | 75.62  | WT | YQSADRPS[V]   | 19.57    | 9  | 83.94252 |
| Se144 | ARHGDI A V204L | HLA-C*03:03 | MT | YQSADRPS[L]   | 110.39 | WT | YQSADRPS[V]   | 691.65   | 9  | 83.94252 |
| Se144 | ARHGDI A V204L | HLA-C*03:03 | MT | [L]PLPPWSASL  | 225.59 | WT | [V]PLPPWSASL  | 247.33   | 10 | 83.94252 |
| Se144 | ARHGDI A V204L | HLA-A*02:01 | MT | S[L]PLPPWSA   | 266    | WT | S[V]PLPPWSA   | 3118.65  | 9  | 83.94252 |
| Se144 | ARHGDI A V204L | HLA-B*54:01 | MT | [L]PLPPWSASL  | 297.81 | WT | [V]PLPPWSASL  | 1554.03  | 10 | 83.94252 |
| Se144 | ARHGDI A V204L | HLA-A*02:06 | MT | S[L]PLPPWSA   | 298.74 | WT | S[V]PLPPWSA   | 360.48   | 9  | 83.94252 |
| Se144 | ARHGDI A V204L | HLA-B*15:01 | MT | YQSADRPS[L]   | 348.53 | WT | YQSADRPS[V]   | 1602.09  | 9  | 83.94252 |
| Se144 | RAD23A V3I     | HLA-C*03:03 | MT | MA[I]TITLKT   | 10.62  | WT | MA[V]TITLKT   | 13.22    | 10 | 58.82365 |
| Se144 | RAD23A V3I     | HLA-A*02:06 | MT | MA[I]TITLKT   | 456.98 | WT | MA[V]TITLKT   | 848.42   | 10 | 58.82365 |
| Se144 | ZNF568 S101I   | HLA-A*02:06 | MT | KVAKIFPL[I]   | 25.42  | WT | KVAKIFPL[S]   | 1942.34  | 9  | 1.58486  |
| Se144 | ZNF568 S101I   | HLA-A*02:06 | MT | KIFPL[I]SDIV  | 69.03  | WT | KIFPL[S]SDIV  | 123.92   | 10 | 1.58486  |
| Se144 | ZNF568 S101I   | HLA-A*02:01 | MT | KIFPL[I]SDIV  | 77.77  | WT | KIFPL[S]SDIV  | 156.28   | 10 | 1.58486  |
| Se144 | ZNF568 S101I   | HLA-A*02:01 | MT | KVAKIFPL[I]   | 149.53 | WT | KVAKIFPL[S]   | 10172.71 | 9  | 1.58486  |
| Se144 | ZNF568 S101I   | HLA-B*54:01 | MT | FPL[I]SDIVT   | 152.91 | WT | FPL[S]SDIVT   | 196.31   | 9  | 1.58486  |
| Se144 | ZNF568 S101I   | HLA-A*02:01 | MT | KIFPL[I]SDI   | 226.61 | WT | KIFPL[S]SDI   | 536.97   | 9  | 1.58486  |
| Se144 | ZNF568 S101I   | HLA-A*02:06 | MT | KIFPL[I]SDI   | 282.44 | WT | KIFPL[S]SDI   | 551.07   | 9  | 1.58486  |
| Se144 | ZNF568 S101I   | HLA-B*54:01 | MT | FPL[I]SDIVTS  | 319.89 | WT | FPL[S]SDIVTS  | 364.98   | 10 | 1.58486  |
| Se144 | NINL Q624K     | HLA-B*15:01 | MT | LMME[K]VKEHY  | 16.72  | WT | LMME[Q]VKEHY  | 16.63    | 10 | 2.99133  |

|       |                |             |    |               |        |    |               |          |    |           |
|-------|----------------|-------------|----|---------------|--------|----|---------------|----------|----|-----------|
| Se144 | NINL Q624K     | HLA-B*15:01 | MT | MME[K]VKEHY   | 375.73 | WT | MME[Q]VKEHY   | 376.84   | 9  | 2.99133   |
| Se144 | PRDM15 V538I   | HLA-A*02:01 | MT | KMFYRKD[I]ML  | 108.06 | WT | KMFYRKD[V]ML  | 101.99   | 10 | 4.11373   |
| Se144 | PRDM15 V538I   | HLA-A*02:06 | MT | KMFYRKD[I]ML  | 277.36 | WT | KMFYRKD[V]ML  | 252.62   | 10 | 4.11373   |
| Se145 | HPDL P254Q     | HLA-A*02:06 | MT | FLARHKG[Q]GL  | 306.55 | WT | FLARHKG[P]GL  | 94.26    | 10 | 3.17168   |
| Se145 | MUTYH D238Y    | HLA-A*02:06 | MT | GA[Y]PSSTLV   | 246.52 | WT | GA[D]PSSTLV   | 946.72   | 9  | 12.04112  |
| Se145 | LRRC8C C322S   | HLA-A*02:06 | MT | LSF[S]YLCFV   | 8.4    | WT | LSF[C]YLCFV   | 9.93     | 9  | 2.66469   |
| Se145 | LRRC8C C322S   | HLA-A*02:06 | MT | KLSF[S]YLCFV  | 11.26  | WT | KLSF[C]YLCFV  | 10.24    | 10 | 2.66469   |
| Se145 | LRRC8C C322S   | HLA-A*02:06 | MT | F[S]YLCFVSI   | 98.08  | WT | F[C]YLCFVSI   | 2224.09  | 9  | 2.66469   |
| Se145 | LRRC8C C322S   | HLA-A*24:02 | MT | SF[S]YLCFVSI  | 277.1  | WT | SF[C]YLCFVSI  | 604.42   | 10 | 2.66469   |
| Se145 | LRRC8C C322S   | HLA-A*02:06 | MT | HLFSKLSF[S]   | 473.11 | WT | HLFSKLSF[C]   | 527.12   | 9  | 2.66469   |
| Se145 | PTGFRN N540D   | HLA-A*24:02 | MT | VFSKPV[D]IF   | 269.4  | WT | VFSKPV[N]IF   | 242.29   | 9  | 17.15123  |
| Se145 | PTGFRN N540D   | HLA-A*02:06 | MT | KPV[D]IFWAL   | 441.74 | WT | KPV[N]IFWAL   | 980.39   | 9  | 17.15123  |
| Se145 | PTGFRN N540D   | HLA-B*54:01 | MT | KPV[D]IFWAL   | 492.7  | WT | KPV[N]IFWAL   | 805.59   | 9  | 17.15123  |
| Se145 | TRAPPC12 E579D | HLA-A*24:02 | MT | YYPEQ[D]PQLL  | 128.26 | WT | YYPEQ[E]PQLL  | 106.73   | 10 | 10.98347  |
| Se145 | TRAPPC12 E579D | HLA-A*24:02 | MT | KYYPEQ[D]PQL  | 291.03 | WT | KYYPEQ[E]PQL  | 263.63   | 10 | 10.98347  |
| Se145 | TET3 Q330H     | HLA-A*02:06 | MT | LLSSEVP[H]I   | 36.13  | WT | LLSSEVP[Q]I   | 60.91    | 9  | 4.22534   |
| Se145 | MFSD6 F456I    | HLA-A*02:06 | MT | W[I]MGFGYGFV  | 8.87   | WT | W[F]MGFGYGFV  | 268.47   | 10 | 14.43912  |
| Se145 | MFSD6 F456I    | HLA-A*02:06 | MT | [I]MGFGYGFV   | 105.27 | WT | [F]MGFGYGFV   | 15.23    | 9  | 14.43912  |
| Se145 | MFSD6 F456I    | HLA-A*24:02 | MT | [I]MGFGYGFV   | 166.4  | WT | [F]MGFGYGFV   | 310.07   | 10 | 14.43912  |
| Se145 | MFSD6 F456I    | HLA-A*24:02 | MT | AW[I]MGFGYGF  | 207.36 | WT | AW[F]MGFGYGF  | 190.43   | 10 | 14.43912  |
| Se145 | MFSD6 F456I    | HLA-A*24:02 | MT | LFVAW[I]MGF   | 211.3  | WT | LFVAW[F]MGF   | 87.25    | 9  | 14.43912  |
| Se145 | MFSD6 F456I    | HLA-A*02:06 | MT | W[I]MGFGYGF   | 262.71 | WT | W[F]MGFGYGF   | 2855.29  | 9  | 14.43912  |
| Se145 | STAT1 S508F    | HLA-A*02:06 | MT | VLSWQFS[F]V   | 17.86  | WT | VLSWQFS[S]V   | 32.86    | 9  | 135.74229 |
| Se145 | STAT1 S508F    | HLA-A*02:06 | MT | EVLSWQFS[F]V  | 33.16  | WT | EVLSWQFS[S]V  | 79.35    | 10 | 135.74229 |
| Se145 | STAT1 S508F    | HLA-A*02:06 | MT | [F]VTKRGLNV   | 321.18 | WT | [S]VTKRGLNV   | 2184.5   | 9  | 135.74229 |
| Se145 | PSMD2 L657P    | HLA-B*54:01 | MT | Q[L]MSQVAVA   | 237.46 | WT | Q[L]MSQVAVA   | 13994.81 | 9  | 120.43078 |
| Se145 | PSMD2 L657P    | HLA-A*02:06 | MT | RQ[P]MSQVAV   | 466.87 | WT | RQ[L]MSQVAV   | 30.39    | 9  | 120.43078 |
| Se145 | TBCCD1 P367H   | HLA-A*02:06 | MT | QLL[P]H]CEFYV | 7.33   | WT | QLL[P]P]CEFYV | 11.53    | 10 | 8.23011   |
| Se145 | TBCCD1 P367H   | HLA-A*02:06 | MT | LLP[H]CEFYV   | 13.45  | WT | LLP[P]CEFYV   | 8.94     | 9  | 8.23011   |
| Se145 | TBCCD1 P367H   | HLA-A*24:02 | MT | VFQLL[P]H]CEF | 71.84  | WT | VFQLL[P]P]CEF | 127.84   | 10 | 8.23011   |
| Se145 | TBCCD1 P367H   | HLA-B*59:01 | MT | LP[H]CEFYVFI  | 178.53 | WT | LP[P]CEFYVFI  | 397.82   | 10 | 8.23011   |
| Se145 | TBCCD1 P367H   | HLA-B*54:01 | MT | LP[H]CEFYVFI  | 312.64 | WT | LP[P]CEFYVFI  | 1797.71  | 10 | 8.23011   |
| Se145 | TBCCD1 P367H   | HLA-A*02:06 | MT | FQLL[P]H]CEF  | 313.66 | WT | FQLL[P]P]CEF  | 241.63   | 9  | 8.23011   |
| Se145 | TBCCD1 P367H   | HLA-A*24:02 | MT | LLP[H]CEFYVF  | 446.74 | WT | LLP[P]CEFYVF  | 266.59   | 10 | 8.23011   |
| Se145 | BMPR1B D384Y   | HLA-A*02:06 | MT | YMPPEVL[Y]ES  | 95.44  | WT | YMPPEVL[D]ES  | 633.37   | 10 | 7.19103   |
| Se145 | BMPR1B D384Y   | HLA-A*24:02 | MT | L[D]YESLNRNH  | 201.21 | WT | L[D]YESLNRNH  | 25087.96 | 10 | 7.19103   |
| Se145 | BMPR1B D384Y   | HLA-B*54:01 | MT | MPPEVL[Y]ES   | 465.44 | WT | MPPEVL[D]ES   | 1813.74  | 9  | 7.19103   |
| Se145 | FBXW7 L170V    | HLA-A*02:06 | MT | LLPKE[V]ALYV  | 21.07  | WT | LLPKE[L]ALYV  | 17.52    | 10 | 3.26088   |
| Se145 | FBXW7 L170V    | HLA-B*54:01 | MT | LPKE[V]ALYV   | 154.53 | WT | LPKE[L]ALYV   | 169.69   | 9  | 3.26088   |
| Se145 | FBXW7 L170V    | HLA-A*02:06 | MT | FISLLPKE[V]   | 330.17 | WT | FISLLPKE[L]   | 1549.08  | 9  | 3.26088   |
| Se145 | FBXW7 L170V    | HLA-A*02:06 | MT | SLLPKE[V]AL   | 363.83 | WT | SLLPKE[L]AL   | 465.93   | 9  | 3.26088   |
| Se145 | CDH18 I634V    | HLA-A*02:06 | MT | ILLAIVVLF[V]  | 27.35  | WT | ILLAIVVLF[I]  | 80.59    | 10 | 2.12814   |
| Se145 | CDH18 I634V    | HLA-A*02:06 | MT | LLAIVVLF[V]   | 112.48 | WT | LLAIVVLF[I]   | 626.54   | 9  | 2.12814   |
| Se145 | CDH18 I634V    | HLA-A*02:06 | MT | AIVVLF[V]I    | 335.78 | WT | AIVVLF[I]I    | 412.5    | 9  | 2.12814   |
| Se145 | CREBRF S37L    | HLA-A*02:06 | MT | S[S]DPDFMYEL  | 12.71  | WT | S[S]DPDFMYEL  | 425.87   | 10 | 10.33317  |
| Se145 | CREBRF S37L    | HLA-A*02:06 | MT | MSTDLLANS[L]  | 393.33 | WT | MSTDLLANS[S]  | 12480.31 | 10 | 10.33317  |
| Se145 | GUSB Y198C     | HLA-A*02:06 | MT | FLINGKPF[C]F  | 80.61  | WT | FLINGKPF[Y]F  | 17.56    | 10 | 17.6885   |
| Se145 | GUSB Y198C     | HLA-A*02:06 | MT | FLINGKPF[C]   | 238.34 | WT | FLINGKPF[Y]   | 740.76   | 9  | 17.6885   |
| Se145 | EPPK1 V1290L   | HLA-A*02:06 | MT | AQVASGFL[L]   | 28.59  | WT | AQVASGFL[V]   | 8.76     | 9  | 15.94372  |
| Se145 | EPPK1 V1290L   | HLA-A*02:06 | MT | L[V]DPLNNQRL  | 267.79 | WT | L[V]DPLNNQRL  | 1027.54  | 10 | 15.94372  |
| Se145 | C10orf88 G203V | HLA-A*02:06 | MT | SMGSKLSP[V]   | 25.77  | WT | SMGSKLSP[G]   | 8166.01  | 9  | 6.07266   |
| Se145 | C10orf88 G203V | HLA-A*02:06 | MT | KLSP[V]AQQ    | 94.41  | WT | KLSP[G]AQQ    | 139.99   | 9  | 6.07266   |
| Se145 | C10orf88 G203V | HLA-A*02:06 | MT | KLSP[V]AQQLM  | 341.55 | WT | KLSP[G]AQQLM  | 401.87   | 10 | 6.07266   |
| Se145 | C10orf88 G203V | HLA-A*02:06 | MT | ESMGSKLSP[V]  | 384.67 | WT | ESMGSKLSP[G]  | 25871.54 | 10 | 6.07266   |
| Se145 | EXPH5 S803C    | HLA-A*02:06 | MT | KLSKTE[C]ISV  | 143.39 | WT | KLSKTE[S]ISV  | 147.76   | 10 | 1.22721   |
| Se145 | CLEC12A S115R  | HLA-A*24:02 | MT | YFL[RD]DDVQTW | 64.52  | WT | YFL[S]DDVQTW  | 62.81    | 10 | 3.18752   |
| Se145 | ERP27 L96P     | HLA-A*02:06 | MT | FQGKILFI[P]V  | 5.05   | WT | FQGKILFI[L]V  | 12.52    | 10 | 35.24937  |
| Se145 | PAPOLA M226L   | HLA-A*02:06 | MT | AINSK[L]FEV   | 9.25   | WT | AINSK[M]FEV   | 14.27    | 9  | 41.58622  |
| Se145 | PAPOLA M226L   | HLA-A*02:06 | MT | K[L]FEVDMKI   | 15.06  | WT | K[M]FEVDMKI   | 10.27    | 9  | 41.58622  |
| Se145 | PAPOLA M226L   | HLA-A*02:06 | MT | QAINSK[L]FEV  | 95.76  | WT | QAINSK[M]FEV  | 96.44    | 10 | 41.58622  |
| Se145 | PAPOLA M226L   | HLA-A*02:06 | MT | K[L]FEVDMKIA  | 204.37 | WT | K[M]FEVDMKIA  | 135.52   | 10 | 41.58622  |
| Se145 | PAPOLA M226L   | HLA-A*24:02 | MT | VYRQAINSK[L]  | 260.55 | WT | VYRQAINSK[M]  | 1103.5   | 10 | 41.58622  |
| Se145 | IFT140 A349T   | HLA-A*02:06 | MT | [T]MWRKVPDFL  | 177.09 | WT | [A]MWRKVPDFL  | 132.14   | 10 | 6.00914   |
| Se145 | LAT C29W       | HLA-A*02:06 | MT | MALCVH[W]HRL  | 117.57 | WT | MALCVH[C]HRL  | 363.7    | 10 | 2.10697   |
| Se145 | SLC38A7 V60I   | HLA-A*02:06 | MT | STLGAIFI[I]V  | 16.24  | WT | STLGAIFI[V]V  | 10.69    | 10 | 4.26961   |
| Se145 | SLC38A7 V60I   | HLA-A*02:06 | MT | STLGAIFI[I]   | 19.01  | WT | STLGAIFI[V]   | 8.1      | 9  | 4.26961   |
| Se145 | SLC38A7 V60I   | HLA-A*02:06 | MT | FI[I]VNACLGA  | 63.97  | WT | FI[V]VNACLGA  | 161.06   | 10 | 4.26961   |
| Se145 | SLC38A7 V60I   | HLA-A*02:06 | MT | TLGAIFI[I]V   | 187.14 | WT | TLGAIFI[V]V   | 113.03   | 9  | 4.26961   |
| Se145 | SLC38A7 V60I   | HLA-A*02:06 | MT | [I]VNACLGAGL  | 396.42 | WT | [V]VNACLGAGL  | 648.28   | 10 | 4.26961   |
| Se145 | TP53 C9Y       | HLA-A*02:06 | MT | CQLAKT[C]PV   | 5.19   | WT | CQLAKT[C]PV   | 13.48    | 9  | 51.02865  |
| Se145 | TP53 C9Y       | HLA-A*02:06 | MT | KT[Y]PVQLWV   | 46.92  | WT | KT[C]PVQLWV   | 255.27   | 9  | 51.02865  |
| Se145 | TP53 C9Y       | HLA-B*54:01 | MT | [Y]PVQLWVDST  | 197.68 | WT | [C]PVQLWVDST  | 494.1    | 10 | 51.02865  |
| Se145 | TOP3A C296W    | HLA-A*02:06 | MT | RLFNHTA[W]LV  | 4.82   | WT | RLFNHTA[C]LV  | 15.89    | 10 | 4.44972   |
| Se145 | TOP3A C296W    | HLA-A*02:06 | MT | RLFNHTA[W]L   | 26.9   | WT | RLFNHTA[C]L   | 106.98   | 9  | 4.44972   |
| Se145 | TOP3A C296W    | HLA-A*02:06 | MT | HTA[W]LVLYQL  | 63.88  | WT | HTA[C]LVLYQL  | 80.42    | 10 | 4.44972   |
| Se145 | TOP3A C296W    | HLA-A*02:06 | MT | [W]LVLYQLCV   | 297.42 | WT | [C]LVLYQLCV   | 719.62   | 9  | 4.44972   |
| Se145 | TOP3A C296W    | HLA-A*02:06 | MT | TA[W]LVLYQL   | 390.13 | WT | TA[C]LVLYQL   | 2833.54  | 9  | 4.44972   |
| Se145 | SUPT6H H792Y   | HLA-A*02:06 | MT | FSSARD[Y]PV   | 22.21  | WT | FSSARD[H]PV   | 56.81    | 9  | 15.82869  |

|       |               |             |    |               |        |    |               |          |    |          |
|-------|---------------|-------------|----|---------------|--------|----|---------------|----------|----|----------|
| Se145 | MISP A617T    | HLA-A*02:06 | MT | HLHSNV[T]WTV  | 37.8   | WT | HLHSNV[A]WTV  | 51.55    | 10 | 10.76699 |
| Se145 | MISP A617T    | HLA-A*02:06 | MT | V[T]WTVEDPV   | 115.23 | WT | V[A]WTVEDPV   | 332.27   | 9  | 10.76699 |
| Se145 | MISP A617T    | HLA-A*02:06 | MT | NV[T]WTVEDPV  | 357.44 | WT | NV[A]WTVEDPV  | 79.92    | 10 | 10.76699 |
| Se145 | CCDC22 A398T  | HLA-A*02:06 | MT | LLPDGT[T]NLA  | 22.71  | WT | LLPDGT[A]NLA  | 13.59    | 9  | 6.03011  |
| Se145 | CCDC22 A398T  | HLA-A*02:06 | MT | LLPDGT[T]NLA  | 96.66  | WT | LLPDGT[A]NLA  | 107.64   | 10 | 6.03011  |
| Se145 | CCDC22 A398T  | HLA-B*54:01 | MT | LPDGT[T]NLA   | 104.87 | WT | LPDGT[A]NLA   | 204.58   | 9  | 6.03011  |
| Se146 | FOLH1 M361L   | HLA-A*24:02 | MT | RMMNDQL[L]F   | 50.1   | WT | RMMNDQL[M]F   | 122.04   | 9  | 7.18455  |
| Se146 | FOLH1 M361L   | HLA-B*15:18 | MT | RMMNDQL[L]F   | 297.6  | WT | RMMNDQL[M]F   | 396.98   | 9  | 7.18455  |
| Se146 | FOLH1 M361L   | HLA-C*12:02 | MT | MMNDQL[L]FL   | 362.96 | WT | MMNDQL[M]FL   | 266.92   | 9  | 7.18455  |
| Se146 | ARNTL2 A353V  | HLA-C*12:02 | MT | FVYVDQRAT[V]  | 29.23  | WT | FVYVDQRAT[A]  | 190.44   | 10 | 1.56064  |
| Se146 | ARNTL2 A353V  | HLA-C*08:01 | MT | YVDQRAT[V]JL  | 111.5  | WT | YVDQRAT[A]JL  | 95.57    | 10 | 1.56064  |
| Se146 | ARNTL2 A353V  | HLA-C*12:02 | MT | YVDQRAT[V]JL  | 216.3  | WT | YVDQRAT[A]JL  | 154.76   | 10 | 1.56064  |
| Se146 | ARNTL2 A353V  | HLA-C*12:02 | MT | YVDQRAT[V]I   | 285.97 | WT | YVDQRAT[A]I   | 221.75   | 9  | 1.56064  |
| Se146 | ARNTL2 A353V  | HLA-C*08:01 | MT | YVDQRAT[V]I   | 362.85 | WT | YVDQRAT[A]I   | 238.62   | 9  | 1.56064  |
| Se146 | TP53 R43H     | HLA-A*31:01 | MT | VVR[H]CPHHER  | 18.39  | WT | VVR[R]CPHHER  | 15.79    | 10 | 18.64553 |
| Se146 | GID4 S126P    | HLA-A*31:01 | MT | LLYSG[P]KFR   | 43.56  | WT | LLYSG[S]KFR   | 50.62    | 9  | 2.5715   |
| Se146 | GID4 S126P    | HLA-A*31:01 | MT | SLLYSG[P]KFR  | 63.75  | WT | SLLYSG[S]KFR  | 66.34    | 10 | 2.5715   |
| Se146 | DIP2A L968V   | HLA-C*12:02 | MT | IAQASGRE[V]   | 408.89 | WT | IAQASGRE[L]   | 359.26   | 9  | 5.35052  |
| Se147 | AP4B1 C214S   | HLA-B*39:01 | MT | DQ[S]VQILTEL  | 193.63 | WT | DQ[C]VQILTEL  | 1169.86  | 10 | 5.78468  |
| Se147 | AP4B1 C214S   | HLA-C*07:02 | MT | TYTDQ[S]VQIL  | 424    | WT | TYTDQ[C]VQIL  | 389.9    | 10 | 5.78468  |
| Se147 | COPA D998Y    | HLA-C*07:02 | MT | YGYPNRNWK[Y]  | 175.58 | WT | YGYPNRNWK[D]  | 13106.76 | 10 | 53.88712 |
| Se147 | COPA D998Y    | HLA-B*39:01 | MT | NRNWK[Y]AGL   | 183.52 | WT | NRNWK[D]AGL   | 170.19   | 9  | 53.88712 |
| Se147 | COPA D998Y    | HLA-B*54:01 | MT | YPNRNWK[Y]A   | 248.48 | WT | YPNRNWK[D]A   | 1268.52  | 9  | 53.88712 |
| Se147 | SWT1 S366T    | HLA-B*54:01 | MT | LPGELM[T]MEI  | 406.94 | WT | LPGELM[S]MEI  | 584.5    | 10 | 1.95501  |
| Se147 | HMCN1 S5611Y  | HLA-C*07:02 | MT | YRMRVRAS[Y]   | 24     | WT | YRMRVRAS[S]   | 2305.83  | 9  | 1.61736  |
| Se147 | HMCN1 S5611Y  | HLA-C*07:02 | MT | YRMRVRAS[Y]Y  | 24.95  | WT | YRMRVRAS[S]Y  | 29.39    | 10 | 1.61736  |
| Se147 | HMCN1 S5611Y  | HLA-A*24:02 | MT | S[Y]YSANGTI   | 71.63  | WT | S[S]YSANGTI   | 11094.28 | 9  | 1.61736  |
| Se147 | HMCN1 S5611Y  | HLA-C*07:02 | MT | [Y]YSANGTIEY  | 82.86  | WT | [S]YSANGTIEY  | 542.26   | 10 | 1.61736  |
| Se147 | HMCN1 S5611Y  | HLA-C*07:02 | MT | S[Y]YSANGTI   | 213.11 | WT | S[S]YSANGTI   | 9393.12  | 9  | 1.61736  |
| Se147 | TLR5 G10A     | HLA-B*39:01 | MT | DHLDLLL[A]V   | 81.89  | WT | DHLDLLL[G]V   | 732.84   | 9  | 1.68495  |
| Se147 | TLR5 G10A     | HLA-B*39:01 | MT | DHLDLLL[A]VV  | 127.99 | WT | DHLDLLL[G]VV  | 299.41   | 10 | 1.68495  |
| Se147 | TLR5 G10A     | HLA-B*39:01 | MT | HLDLLL[A]VVL  | 311.13 | WT | HLDLLL[G]VVL  | 502.22   | 10 | 1.68495  |
| Se147 | AHCTF1 P1672T | HLA-B*54:01 | MT | LPYVPE[T]IKV  | 62.3   | WT | LPYVPE[P]IKV  | 115.25   | 10 | 9.13968  |
| Se147 | NCKAP1 I720V  | HLA-C*07:02 | MT | IRFTKS[V]VGM  | 123.29 | WT | IRFTKS[I]VGM  | 128.52   | 10 | 39.68986 |
| Se147 | DHTKD1 G104R  | HLA-B*39:01 | MT | FHTA[R]LLNM   | 136.29 | WT | FHTA[G]LLNM   | 65.99    | 9  | 7.05308  |
| Se147 | EXT2 P558L    | HLA-B*39:01 | MT | NKLSNRFF[L]   | 125.12 | WT | NKLSNRFF[P]   | 21206.02 | 9  | 15.15225 |
| Se147 | EXT2 P558L    | HLA-B*39:01 | MT | NRFF[L]YDEI   | 336.4  | WT | NRFF[P]YDEI   | 666.1    | 9  | 15.15225 |
| Se147 | MAP3K11 C686Y | HLA-B*39:01 | MT | [Y]PTEPPPSPL  | 37.02  | WT | [C]PTEPPPSPL  | 441.86   | 10 | 14.50594 |
| Se147 | MAP3K11 C686Y | HLA-B*54:01 | MT | [Y]PTEPPPSPL  | 460.09 | WT | [C]PTEPPPSPL  | 1272.88  | 10 | 14.50594 |
| Se147 | MCF2L L730P   | HLA-B*39:01 | MT | HKLS[P]DSYLL  | 337.83 | WT | HKLS[L]DSYLL  | 196.96   | 10 | 1.22321  |
| Se147 | INO80E E152K  | HLA-B*39:01 | MT | LQLP[K]PSPL   | 171.02 | WT | LQLP[E]PSPL   | 175.81   | 9  | 14.74807 |
| Se147 | TP53 L125Q    | HLA-B*39:01 | MT | T[Q]JEDSSGNLL | 455.37 | WT | T[L]JEDSSGNLL | 5562.02  | 10 | 10.73066 |
| Se147 | IRGQ R483K    | HLA-B*39:01 | MT | LRAGAW[K]PAL  | 100.3  | WT | LRAGAW[R]PAL  | 60.95    | 10 | 1.72038  |
| Se147 | IRGQ R483K    | HLA-B*54:01 | MT | [K]PALLASLAA  | 199.51 | WT | [R]PALLASLAA  | 107.06   | 10 | 1.72038  |
| Se147 | SIGLEC7 R253T | HLA-B*54:01 | MT | [T]PVSGVLLGA  | 200.24 | WT | [R]PVSGVLLGA  | 596.5    | 10 | 3.78276  |
| Se147 | ZNF470 V553F  | HLA-A*24:02 | MT | AFSQIAHL[V]   | 30.35  | WT | AFSQIAHL[V]   | 1371.12  | 9  | 1.08214  |
| Se147 | ATP9A A89T    | HLA-A*24:02 | MT | YFLLL[T]CSQF  | 61.62  | WT | YFLLL[A]CSQF  | 89.23    | 10 | 7.76951  |
| Se150 | PTGS2 V87A    | HLA-A*24:02 | MT | FWN[A]VNNIPF  | 210.62 | WT | FWN[V]VNNIPF  | 374.13   | 10 | 3.46914  |
| Se150 | ASPM Q2844E   | HLA-B*40:01 | MT | I[E]JFFLQMAV  | 32.69  | WT | I[Q]JFFLQMAV  | 1737.79  | 9  | 3.34351  |
| Se150 | ASPM Q2844E   | HLA-B*15:01 | MT | I[E]JFFLQMAVY | 201.27 | WT | I[Q]JFFLQMAVY | 16.15    | 10 | 3.34351  |
| Se150 | ASPM Q2844E   | HLA-A*26:01 | MT | [E]JFFLQMAVY  | 219.15 | WT | [Q]JFFLQMAVY  | 3951.19  | 9  | 3.34351  |
| Se150 | ASPM Q2844E   | HLA-B*15:01 | MT | ALRI[E]JFFLQM | 419.21 | WT | ALRI[Q]JFFLQM | 443.86   | 10 | 3.34351  |
| Se150 | CAMSAP2 L737V | HLA-B*40:01 | MT | SEMVH[V]RMKL  | 26.31  | WT | SEMVH[L]RMKL  | 29.37    | 10 | 9.81998  |
| Se150 | CYP26B1 F389I | HLA-B*40:01 | MT | VELASTSR[I]   | 457.55 | WT | VELASTSR[F]   | 819.12   | 9  | 7.51098  |
| Se150 | SESTD1 L359I  | HLA-B*15:01 | MT | LQQQ[I]SDVCY  | 90.9   | WT | LQQQ[L]SDVCY  | 87.42    | 10 | 3.43547  |
| Se150 | SESTD1 L359I  | HLA-B*15:01 | MT | QQQ[I]SDVCY   | 313.24 | WT | QQQ[L]SDVCY   | 392.58   | 9  | 3.43547  |
| Se150 | SESTD1 L359I  | HLA-B*40:01 | MT | VELKSLQQQ[I]  | 388.76 | WT | VELKSLQQQ[L]  | 101.48   | 10 | 3.43547  |
| Se150 | EPHA3 E872Q   | HLA-A*24:02 | MT | KF[Q]QIVSIL   | 335.02 | WT | KF[E]QIVSIL   | 2048.38  | 9  | 1.55131  |
| Se150 | MATR3 L28F    | HLA-B*15:01 | MT | [F]LAAATQSL   | 80.44  | WT | [L]LAAATQSL   | 52.8     | 9  | 50.66043 |
| Se150 | NDST1 P221S   | HLA-B*15:01 | MT | VL[S]GEDWTVF  | 119.41 | WT | VL[P]GEDWTVF  | 1213.8   | 10 | 20.18812 |
| Se150 | NDST1 P221S   | HLA-B*15:01 | MT | L[S]GEDWTVF   | 374.66 | WT | L[P]GEDWTVF   | 9326.49  | 9  | 20.18812 |
| Se150 | SIMC1 P159H   | HLA-B*40:01 | MT | TE[H]NCSSATF  | 189.34 | WT | TE[P]NCSSATF  | 971.5    | 10 | 4.77901  |
| Se150 | HERPUD2 H200Q | HLA-B*15:01 | MT | QQMYA[Q]QYY   | 21.4   | WT | QQMYA[H]QYY   | 17       | 9  | 11.38539 |
| Se150 | HERPUD2 H200Q | HLA-B*15:01 | MT | QQMYA[Q]QYY   | 47.59  | WT | QQMYA[H]QYYM  | 38.34    | 10 | 11.38539 |
| Se150 | HERPUD2 H200Q | HLA-B*15:01 | MT | WQQMYA[Q]QY   | 52.07  | WT | WQQMYA[H]QYY  | 51.4     | 10 | 11.38539 |
| Se150 | HERPUD2 H200Q | HLA-B*15:01 | MT | WQQMYA[Q]QY   | 63.34  | WT | WQQMYA[H]QY   | 73.86    | 9  | 11.38539 |
| Se150 | HERPUD2 H200Q | HLA-B*15:01 | MT | QMYA[Q]QYYM   | 90.54  | WT | QMYA[H]QYYM   | 47.46    | 9  | 11.38539 |
| Se150 | HERPUD2 H200Q | HLA-B*15:01 | MT | YA[Q]QYYMQY   | 149.33 | WT | YA[H]QYYMQY   | 86.84    | 9  | 11.38539 |
| Se150 | HERPUD2 H200Q | HLA-A*24:02 | MT | MYA[Q]QYYMQ   | 207.18 | WT | MYA[H]QYYMQY  | 215.64   | 10 | 11.38539 |
| Se150 | CLDN15 P149L  | HLA-B*15:01 | MT | ITRDFD[P]LY   | 342.98 | WT | ITRDFD[P]LY   | 386.43   | 10 | 3.00978  |
| Se150 | CLDN15 P149T  | HLA-B*15:01 | MT | ITRDFD[T]LY   | 236.88 | WT | ITRDFD[P]LY   | 386.43   | 10 | 3.00978  |
| Se150 | CLDN15 P149T  | HLA-A*26:01 | MT | D[T]LYPGTKY   | 446.22 | WT | D[P]LYPGTKY   | 20366.57 | 9  | 3.00978  |
| Se150 | RAB11FIP1 V5I | HLA-B*15:01 | MT | LM[V]SAGRGL   | 104.71 | WT | LM[V]SAGRGL   | 194.78   | 9  | 3.24423  |
| Se150 | RAB18 E173V   | HLA-B*40:01 | MT | [V]EPPVVIAL   | 16.88  | WT | [E]EPPVVIAL   | 38.5     | 10 | 23.24097 |
| Se150 | RHOBTB1 D674G | HLA-B*40:01 | MT | REREKE[G]IAL  | 41.62  | WT | REREKE[D]IAL  | 44.96    | 10 | 6.14222  |
| Se150 | SCD A159V     | HLA-B*40:01 | MT | YEWARHR[V]    | 400.09 | WT | YEWARHR[A]    | 3179.43  | 9  | 38.93841 |
| Se150 | FJX1 R149C    | HLA-B*40:01 | MT | LEAA[C]GARM   | 92.58  | WT | LEAA[R]GARM   | 888.9    | 9  | 5.23972  |
| Se150 | FJX1 R149C    | HLA-B*40:01 | MT | LEAA[C]GARMV  | 250.2  | WT | LEAA[R]GARMV  | 1232.64  | 10 | 5.23972  |



|       |                |             |    |               |        |    |               |          |    |          |
|-------|----------------|-------------|----|---------------|--------|----|---------------|----------|----|----------|
| Se150 | MPEG1 L121H    | HLA-B*15:01 | MT | YSINTELS[H]F  | 14.96  | WT | YSINTELS[L]F  | 35.71    | 10 | 11.70516 |
| Se150 | MPEG1 L121H    | HLA-B*15:01 | MT | SINTELS[H]F   | 49.12  | WT | SINTELS[L]F   | 200.2    | 9  | 11.70516 |
| Se150 | SYT12 G27R     | HLA-A*24:02 | MT | VYAA[R]ALALL  | 42.01  | WT | VYAA[G]ALALL  | 43.9     | 10 | 4.30419  |
| Se150 | SYT12 G27R     | HLA-A*24:02 | MT | VYAA[R]ALAL   | 166    | WT | VYAA[G]ALAL   | 171.9    | 9  | 4.30419  |
| Se150 | CAPRIN2 C867W  | HLA-B*15:01 | MT | SQRDNFQQ[W]Y  | 24.94  | WT | SQRDNFQQ[C]Y  | 34.99    | 10 | 3.32066  |
| Se150 | CAPRIN2 C867W  | HLA-B*15:01 | MT | SQRDNFQQ[W]   | 312.7  | WT | SQRDNFQQ[C]   | 4426.66  | 9  | 3.32066  |
| Se150 | SERPINA5 L79V  | HLA-B*15:01 | MT | SMSLAM[V]SL   | 287.29 | WT | SMSLAM[L]SL   | 212.49   | 9  | 1.31422  |
| Se150 | SERPINA5 L79V  | HLA-B*15:01 | MT | ISMSLAM[V]SL  | 446.98 | WT | ISMSLAM[L]SL  | 366.7    | 10 | 1.31422  |
| Se150 | RPS27L T74A    | HLA-B*15:01 | MT | KARL[A]EGCSF  | 249.24 | WT | KARL[T]EGCSF  | 336.23   | 10 | 29.59643 |
| Se150 | USP31 G522R    | HLA-B*15:01 | MT | RVVSVV[R]ITY  | 123.26 | WT | RVVSVV[G]ITY  | 82.29    | 10 | 3.15506  |
| Se150 | ITGAM C776R    | HLA-B*40:01 | MT | [R]QDDL[SITF  | 416.51 | WT | [C]QDDL[SITF  | 1505.26  | 9  | 4.49477  |
| Se150 | ITGAM C776R    | HLA-B*15:01 | MT | [R]QDDL[SITF  | 477.12 | WT | [C]QDDL[SITF  | 867.76   | 9  | 4.49477  |
| Se150 | RYR1 K2360T    | HLA-B*15:01 | MT | LLIR[T]PECF   | 97.48  | WT | LLIR[K]PECF   | 313.53   | 9  | 3.39768  |
| Se150 | MAP3K10 A316S  | HLA-B*15:01 | MT | ALAVAYGV[S]M  | 68.3   | WT | ALAVAYGV[A]M  | 79.58    | 10 | 2.42613  |
| Se150 | MAP3K10 A316S  | HLA-B*15:01 | MT | [S]MKNKLTLP   | 96     | WT | [A]MKNKLTLP   | 78.67    | 9  | 2.42613  |
| Se150 | MAP3K10 A316S  | HLA-B*15:01 | MT | LAVAYGV[S]M   | 129.59 | WT | LAVAYGV[A]M   | 122.99   | 9  | 2.42613  |
| Se151 | MTMR12 I264T   | HLA-A*24:02 | MT | RFQGHGIP[T]W  | 101.05 | WT | RFQGHGIP[I]W  | 215.49   | 10 | 6.22305  |
| Se152 | LHX9 E108D     | HLA-C*03:04 | MT | LALES[D]LTCF  | 84.47  | WT | LALES[E]LTCF  | 152.87   | 10 | 1.56466  |
| Se152 | BIRC6 A2681V   | HLA-B*40:01 | MT | KENG[V]DIFL   | 8.81   | WT | KENG[A]DIFL   | 9        | 9  | 6.21017  |
| Se152 | FBXO41 S411F   | HLA-C*03:04 | MT | GASSRVPAA[F]  | 153.3  | WT | GASSRVPAA[S]  | 18544.78 | 10 | 1.12819  |
| Se152 | NCKAP5 L439F   | HLA-C*03:04 | MT | SA[F]SAVSSM   | 5.14   | WT | SA[L]SAVSSM   | 7.29     | 9  | 1.19077  |
| Se152 | NCKAP5 L439F   | HLA-A*31:01 | MT | SA[F]SAVSSMR  | 38.47  | WT | SA[L]SAVSSMR  | 90.45    | 10 | 1.19077  |
| Se152 | NCKAP5 L439F   | HLA-A*31:01 | MT | A[F]SAVSSMR   | 46.02  | WT | A[L]SAVSSMR   | 101.45   | 9  | 1.19077  |
| Se152 | NCKAP5 L439F   | HLA-C*14:02 | MT | SA[F]SAVSSM   | 50.3   | WT | SA[L]SAVSSM   | 105.59   | 9  | 1.19077  |
| Se152 | NCKAP5 L439F   | HLA-C*03:04 | MT | QSA[F]SAVSSM  | 214.49 | WT | QSA[L]SAVSSM  | 198.87   | 10 | 1.19077  |
| Se152 | NCKAP5 L439F   | HLA-B*51:01 | MT | LPLQSA[F]SAV  | 249.38 | WT | LPLQSA[L]SAV  | 366.38   | 10 | 1.19077  |
| Se152 | NCKAP5 G829A   | HLA-C*03:04 | MT | TTLPS[A]L     | 80.41  | WT | TTLPS[G]L     | 694.62   | 9  | 1.19077  |
| Se152 | NCKAP5 G829A   | HLA-C*03:04 | MT | LPSS[A]LVTL   | 221.64 | WT | LPSS[G]LVTL   | 232.15   | 9  | 1.19077  |
| Se152 | NCKAP5 G829A   | HLA-C*03:04 | MT | ATTLPS[A]L    | 277.44 | WT | ATTLPS[G]L    | 1805.76  | 10 | 1.19077  |
| Se152 | NCKAP5 G829A   | HLA-C*14:02 | MT | LLPSS[A]LVTL  | 296.16 | WT | LLPSS[G]LVTL  | 324.26   | 10 | 1.19077  |
| Se152 | NCKAP5 G829A   | HLA-C*03:04 | MT | LLPSS[A]LVTL  | 471.83 | WT | LLPSS[G]LVTL  | 508.04   | 10 | 1.19077  |
| Se152 | SCRN3 N410K    | HLA-A*24:02 | MT | IYQS[K]LSVKV  | 202.36 | WT | IYQS[N]LSVKV  | 129.66   | 10 | 4.81877  |
| Se152 | SCRN3 N410K    | HLA-C*14:02 | MT | IYQS[K]LSVKV  | 249.79 | WT | IYQS[N]LSVKV  | 102.6    | 10 | 4.81877  |
| Se152 | SCRN3 N410K    | HLA-B*40:01 | MT | DEIQYQS[K]L   | 342.26 | WT | DEIQYQS[N]L   | 294.39   | 10 | 4.81877  |
| Se152 | TTC14 K463N    | HLA-A*31:01 | MT | KLRKLL[N]EEK  | 291.93 | WT | KLRKLL[K]EEK  | 466.3    | 10 | 10.3467  |
| Se152 | PCDH18 V201I   | HLA-C*03:04 | MT | YAELIV[I]REL  | 24.89  | WT | YAELIV[V]REL  | 19.76    | 10 | 3.87863  |
| Se152 | PCDH18 V201I   | HLA-B*40:01 | MT | AELIV[I]REL   | 30.09  | WT | AELIV[V]REL   | 30.74    | 9  | 3.87863  |
| Se152 | PCDH18 V201I   | HLA-A*31:01 | MT | KYAELIV[I]R   | 44.73  | WT | KYAELIV[V]R   | 32.73    | 9  | 3.87863  |
| Se152 | MDN1 R2012C    | HLA-A*24:02 | MT | PYMGTRLF[C]I  | 36.81  | WT | PYMGTRLF[R]I  | 24.88    | 10 | 2.69131  |
| Se152 | SPAG1 G773R    | HLA-B*40:01 | MT | [R]JEVSMGCLA  | 349.22 | WT | [G]JEVSMGCLA  | 755.16   | 9  | 1.07399  |
| Se152 | DGKZ R44C      | HLA-A*24:02 | MT | RY[C]SWDVPQI  | 24.47  | WT | RY[R]SWDVPQI  | 57.19    | 10 | 8.91775  |
| Se152 | DGKZ R44C      | HLA-A*24:02 | MT | RQMWRV[C]SW   | 105.54 | WT | RQMWRV[R]SW   | 223.73   | 9  | 8.91775  |
| Se152 | DGKZ R44C      | HLA-C*14:02 | MT | RY[C]SWDVPQI  | 486.27 | WT | RY[R]SWDVPQI  | 233.39   | 10 | 8.91775  |
| Se152 | MTCH2 A62V     | HLA-C*14:02 | MT | SYAQHI[V]SI   | 16.15  | WT | SYAQHI[A]SI   | 12.44    | 9  | 23.32261 |
| Se152 | MTCH2 A62V     | HLA-A*24:02 | MT | SYAQHI[V]SI   | 25.3   | WT | SYAQHI[A]SI   | 29.21    | 9  | 23.32261 |
| Se152 | MTCH2 A62V     | HLA-C*03:04 | MT | FSYAQHI[V]SI  | 28.32  | WT | FSYAQHI[A]SI  | 19.13    | 10 | 23.32261 |
| Se152 | MTCH2 A62V     | HLA-A*31:01 | MT | HI[V]SIDGRR   | 198.34 | WT | HI[A]SIDGRR   | 118.28   | 9  | 23.32261 |
| Se152 | MTCH2 A62V     | HLA-A*31:01 | MT | AQHI[V]SIDGR  | 270.68 | WT | AQHI[A]SIDGR  | 428.31   | 10 | 23.32261 |
| Se152 | MTCH2 A62V     | HLA-C*14:02 | MT | FSYAQHI[V]SI  | 302.33 | WT | FSYAQHI[A]SI  | 192.64   | 10 | 23.32261 |
| Se152 | MTCH2 A62V     | HLA-C*03:04 | MT | [V]SIDGRRGL   | 421.74 | WT | [A]SIDGRRGL   | 539.25   | 9  | 23.32261 |
| Se152 | KCNJ5 L141P    | HLA-C*03:04 | MT | FVSAF[P]FSI   | 45.44  | WT | FVSAF[L]FSI   | 376.82   | 9  | 11.75767 |
| Se152 | KCNJ5 L141P    | HLA-A*24:02 | MT | GFVSAF[P]FSI  | 260.73 | WT | GFVSAF[L]FSI  | 284.03   | 10 | 11.75767 |
| Se152 | KCNJ5 L141P    | HLA-C*14:02 | MT | SGFVSAF[P]F   | 347.73 | WT | SGFVSAF[L]F   | 966.58   | 9  | 11.75767 |
| Se152 | DYNC1H1 E1034K | HLA-B*40:01 | MT | [K]JESYSAVMGI | 46.5   | WT | [E]JESYSAVMGI | 350.11   | 10 | 14.72545 |
| Se152 | DYNC1H1 E1034K | HLA-C*03:04 | MT | VAL[K]JESYSAV | 183.69 | WT | VAL[E]JESYSAV | 105.07   | 10 | 14.72545 |
| Se152 | DYNC1H1 E1034K | HLA-A*31:01 | MT | RMPDGPVAL[K]  | 186.23 | WT | RMPDGPVAL[E]  | 20115.75 | 10 | 14.72545 |
| Se152 | CNOT1 E879K    | HLA-A*31:01 | MT | RFKDISTIKR[K] | 280.68 | WT | RFKDISTIKR[E] | 20598.61 | 10 | 25.12001 |
| Se152 | TP53 G112S     | HLA-A*31:01 | MT | SSCM[S]GMNR   | 88.49  | WT | SSCM[G]GMNR   | 110.57   | 9  | 49.38192 |
| Se152 | TP53 G112S     | HLA-A*31:01 | MT | SSCM[S]GMNRR  | 124.2  | WT | SSCM[G]GMNRR  | 172.56   | 10 | 49.38192 |
| Se152 | TP53 G112S     | HLA-C*14:02 | MT | [S]GMNRRPIL   | 224.15 | WT | [G]GMNRRPIL   | 1455.53  | 9  | 49.38192 |
| Se152 | PIEZO2 R399I   | HLA-C*03:04 | MT | YATHYPTDE[I]  | 21.33  | WT | YATHYPTDE[R]  | 26714.36 | 10 | 1.80248  |
| Se152 | PIEZO2 R399I   | HLA-C*14:02 | MT | HYPTDE[I]KLL  | 261.27 | WT | HYPTDE[R]KLL  | 370.7    | 10 | 1.80248  |
