# Supplementary material for: Neoantigen load and HLA-class I expression identify a subgroup of tumors with a T-cell-inflamed phenotype and favorable prognosis in homologous recombination-proficient high-grade serous ovarian carcinoma
Source: PubMed Central journal article supplement — J Immunother Cancer. 2020 May 26;8(1):e000375. doi: 10.1136/jitc-2019-000375 (PMC7254153; doi:10.1136/jitc-2019-000375), 2020-05-26
Supplement: jitc-2019-000375supp003.pdf [file jitc-2019-000375supp003.pdf]

Supplementary Table S3 Neopeptides from insertion/deletion and non-stop mutations in 80 HGSC patients

| Patient ID | Gene     | Alteration                               | Mutant protein                                                              | HLA         | Epitope(MT) | Peptid | IC50 (nM) | FPKM    | Mutation type       |
|------------|----------|------------------------------------------|-----------------------------------------------------------------------------|-------------|-------------|--------|-----------|---------|---------------------|
| Se001      | APBA3    | NM_004886.3c.896delA                     | DHALHTISYTAASAACWC                                                          | HLA-A*24:02 | SYTAASAACW  | 10     | 200.6     | 7.12672 | frameshift deletion |
| Se001      | APBA3    | NM_004886.3c.896delA                     | DHALHTISYTAASAACWC                                                          | HLA-C*12:02 | ISYTAASAA   | 9      | 412.2     | 7.12672 | frameshift deletion |
| Se001      | APBA3    | NM_004886.3c.896delA                     | DHALHTISYTAASAACWC                                                          | HLA-C*12:02 | YTAASAACW   | 9      | 490.1     | 7.12672 | frameshift deletion |
| Se001      | DICER1   | NM_177438.2c.1311_1317delTTTACC          | KEKPETNFPSPFCAELFLWKEDTQQLS                                                 | HLA-A*24:02 | TFCAELFLW   | 9      | 271.5     | 8.09055 | frameshift deletion |
| Se001      | DICER1   | NM_001291628.1c.1311_1317delTTTACC       | KEKPETNFPSPFCAELFLWKEDTQQLS                                                 | HLA-C*14:03 | LWKEDTQQL   | 9      | 208.8     | 8.09055 | frameshift deletion |
| Se001      | PLXNB2   | NM_012401.3c.2404_2410delCCGCCCG         | EALCNTTSECPSSPGSSLRAPWVGASASP<br>SWGPIWASKQGTSRGSLWPAGTAPFSRNV<br>TPCPPGSCV | HLA-A*24:02 | LWPAGTAPF   | 9      | 97.5      | 20.1964 | frameshift deletion |
| Se001      | PLXNB2   | NM_012401.3c.2404_2410delCCGCCCG         | EALCNTTSECPSSPGSSLRAPWVGASASP<br>SWGPIWASKQGTSRGSLWPAGTAPFSRNV<br>TPCPPGSCV | HLA-A*24:02 | SLWPAGTAPF  | 10     | 387.1     | 20.1964 | frameshift deletion |
| Se001      | PLXNB2   | NM_012401.3c.2404_2410delCCGCCCG         | EALCNTTSECPSSPGSSLRAPWVGASASP<br>SWGPIWASKQGTSRGSLWPAGTAPFSRNV<br>TPCPPGSCV | HLA-C*14:03 | LWPAGTAPF   | 9      | 51.4      | 20.1964 | frameshift deletion |
| Se001      | SCAF11   | NM_004719.2c.2599_2613delCCAAAAAGGGATACT | ARERRQSQSRSTRESRRSELS                                                       | HLA-A*33:03 | QSRSTRESR   | 9      | 110.2     | 17.3825 | inframe deletion    |
| Se001      | RALGAP1  | NM_001330075.1c.1534_1545delTCTGAAGAAGCC | NGSYQGALHNATEQNIRAGTQA                                                      | HLA-C*14:03 | SYQGALHNA   | 9      | 179.2     | 6.78143 | inframe deletion    |
| Se004      | KIAA1551 | NM_018169.3c.4612_4615delGAAA            | SKTYNILRNVKKLVGSSLIKYGLIRLN                                                 | HLA-A*31:01 | TYNILRNVK   | 9      | 296.7     | 25.0253 | frameshift deletion |
| Se004      | KIAA1551 | NM_018169.3c.4612_4615delGAAA            | SKTYNILRNVKKLVGSSLIKYGLIRLN                                                 | HLA-A*31:01 | KTYNILRNVK  | 10     | 69.9      | 25.0253 | frameshift deletion |
| Se004      | KIAA1551 | NM_018169.3c.4612_4615delGAAA            | SKTYNILRNVKKLVGSSLIKYGLIRLN                                                 | HLA-A*31:01 | SSLIKYGLIR  | 10     | 116.6     | 25.0253 | frameshift deletion |
| Se004      | KIAA1551 | NM_018169.3c.4612_4615delGAAA            | SKTYNILRNVKKLVGSSLIKYGLIRLN                                                 | HLA-A*31:01 | SLIKYGLIR   | 9      | 204.2     | 25.0253 | frameshift deletion |
| Se004      | MLK4     | NM_032435.2c.2983delC                    | QFLAAKERTKSMCLHYWMLTWKVRAGT<br>TLCHCAE                                      | HLA-C*03:04 | KSMCLHYWM   | 9      | 494.3     | 6.9482  | frameshift deletion |
| Se004      | MLK4     | NM_032435.2c.2983delC                    | QFLAAKERTKSMCLHYWMLTWKVRAGT<br>TLCHCAE                                      | HLA-A*33:03 | HYWMLTWKVR  | 10     | 22.2      | 6.9482  | frameshift deletion |
| Se004      | MLK4     | NM_032435.2c.2983delC                    | QFLAAKERTKSMCLHYWMLTWKVRAGT<br>TLCHCAE                                      | HLA-A*31:01 | HYWMLTWKVR  | 10     | 24.2      | 6.9482  | frameshift deletion |
| Se004      | MLK4     | NM_032435.2c.2983delC                    | QFLAAKERTKSMCLHYWMLTWKVRAGT<br>TLCHCAE                                      | HLA-B*40:02 | KERTKSMCL   | 9      | 283       | 6.9482  | frameshift deletion |
| Se004      | MLK4     | NM_032435.2c.2983delC                    | QFLAAKERTKSMCLHYWMLTWKVRAGT<br>TLCHCAE                                      | HLA-A*33:03 | YWMLTWKVR   | 9      | 154.5     | 6.9482  | frameshift deletion |
| Se004      | MLK4     | NM_032435.2c.2983delC                    | QFLAAKERTKSMCLHYWMLTWKVRAGT<br>TLCHCAE                                      | HLA-A*31:01 | YWMLTWKVR   | 9      | 191.2     | 6.9482  | frameshift deletion |
| Se004      | MLK4     | NM_032435.2c.2983delC                    | QFLAAKERTKSMCLHYWMLTWKVRAGT<br>TLCHCAE                                      | HLA-A*31:01 | KSMCLHYWM   | 9      | 150.2     | 6.9482  | frameshift deletion |
| Se004      | MLK4     | NM_032435.2c.2983delC                    | QFLAAKERTKSMCLHYWMLTWKVRAGT<br>TLCHCAE                                      | HLA-A*31:01 | KSMCLHYWML  | 10     | 276.4     | 6.9482  | frameshift deletion |

|       |        |                                                        |                                                                                                   |             |            |    |       |         |                      |
|-------|--------|--------------------------------------------------------|---------------------------------------------------------------------------------------------------|-------------|------------|----|-------|---------|----------------------|
| Se004 | PTPRC  | NM_002838.4c.3765_3785del<br>AAAGCAGGATGCTAATTG<br>TGT | KIEFDNEVDKVNPLGAPEKLPE                                                                            | HLA-B*40:02 | NEVDKVNPL  | 9  | 97.9  | 2.0091  | inframe deletion     |
| Se004 | PTPRC  | NM_002838.4c.3765_3785del<br>AAAGCAGGATGCTAATTG<br>TGT | KIEFDNEVDKVNPLGAPEKLPE                                                                            | HLA-A*31:01 | KVNPLGAPEK | 10 | 245.4 | 2.0091  | inframe deletion     |
| Se004 | DNMT3B | NM_006892.3c.653_654insA                               | SGDGSSEYQGWEGVWNRGPRV<br>GKDDQGLLLVARHGGVLEGLH<br>LQATGYVWHAVGPPV<br>VWRWQVLRGLCRQTGGT<br>GAVQPAL | HLA-A*31:01 | VVWRWQVLR  | 9  | 9.4   | 6.09989 | frameshift insertion |
| Se004 | DNMT3B | NM_006892.3c.653_654insA                               | SGDGSSEYQGWEGVWNRGPRV<br>GKDDQGLLLVARHGGVLEGLH<br>LQATGYVWHAVGPPV<br>VWRWQVLRGLCRQTGGT<br>GAVQPAL | HLA-A*31:01 | RWQVLRGLCR | 10 | 64.7  | 6.09989 | frameshift insertion |
| Se004 | DNMT3B | NM_006892.3c.653_654insA                               | SGDGSSEYQGWEGVWNRGPRV<br>GKDDQGLLLVARHGGVLEGLH<br>LQATGYVWHAVGPPV<br>VWRWQVLRGLCRQTGGT<br>GAVQPAL | HLA-A*31:01 | PVVWRWQVLR | 10 | 84.8  | 6.09989 | frameshift insertion |
| Se004 | DNMT3B | NM_006892.3c.653_654insA                               | SGDGSSEYQGWEGVWNRGPRV<br>GKDDQGLLLVARHGGVLEGLH<br>LQATGYVWHAVGPPV<br>VWRWQVLRGLCRQTGGT<br>GAVQPAL | HLA-A*31:01 | HAVGPVVWR  | 9  | 97    | 6.09989 | frameshift insertion |
| Se004 | DNMT3B | NM_006892.3c.653_654insA                               | SGDGSSEYQGWEGVWNRGPRV<br>GKDDQGLLLVARHGGVLEGLH<br>LQATGYVWHAVGPPV<br>VWRWQVLRGLCRQTGGT<br>GAVQPAL | HLA-A*31:01 | QGEGVWNR   | 9  | 239.9 | 6.09989 | frameshift insertion |
| Se004 | DNMT3B | NM_006892.3c.653_654insA                               | SGDGSSEYQGWEGVWNRGPRV<br>GKDDQGLLLVARHGGVLEGLH<br>LQATGYVWHAVGPPV<br>VWRWQVLRGLCRQTGGT<br>GAVQPAL | HLA-A*31:01 | KDQGLLLVAR | 10 | 241.2 | 6.09989 | frameshift insertion |
| Se004 | DNMT3B | NM_006892.3c.653_654insA                               | SGDGSSEYQGWEGVWNRGPRV<br>GKDDQGLLLVARHGGVLEGLH<br>LQATGYVWHAVGPPV<br>VWRWQVLRGLCRQTGGT<br>GAVQPAL | HLA-A*31:01 | YQGWEGVWNR | 10 | 254.1 | 6.09989 | frameshift insertion |
| Se004 | DNMT3B | NM_006892.3c.653_654insA                               | SGDGSSEYQGWEGVWNRGPRV<br>GKDDQGLLLVARHGGVLEGLH<br>LQATGYVWHAVGPPV<br>VWRWQVLRGLCRQTGGT<br>GAVQPAL | HLA-A*31:01 | VVWRWQVLRG | 10 | 310.9 | 6.09989 | frameshift insertion |
| Se004 | DNMT3B | NM_006892.3c.653_654insA                               | SGDGSSEYQGWEGVWNRGPRV<br>GKDDQGLLLVARHGGVLEGLH<br>LQATGYVWHAVGPPV<br>VWRWQVLRGLCRQTGGT<br>GAVQPAL | HLA-A*33:03 | VVWRWQVLR  | 9  | 17.5  | 6.09989 | frameshift insertion |
| Se004 | DNMT3B | NM_006892.3c.653_654insA                               | SGDGSSEYQGWEGVWNRGPRV<br>GKDDQGLLLVARHGGVLEGLH<br>LQATGYVWHAVGPPV<br>VWRWQVLRGLCRQTGGT<br>GAVQPAL | HLA-A*33:03 | HAVGPVVWR  | 9  | 48.8  | 6.09989 | frameshift insertion |
| Se004 | DNMT3B | NM_006892.3c.653_654insA                               | SGDGSSEYQGWEGVWNRGPRV<br>GKDDQGLLLVARHGGVLEGLH<br>LQATGYVWHAVGPPV<br>VWRWQVLRGLCRQTGGT<br>GAVQPAL | HLA-A*33:03 | EGVWNRGPR  | 9  | 62.6  | 6.09989 | frameshift insertion |
| Se004 | DNMT3B | NM_006892.3c.653_654insA                               | SGDGSSEYQGWEGVWNRGPRV<br>GKDDQGLLLVARHGGVLEGLH<br>LQATGYVWHAVGPPV<br>VWRWQVLRGLCRQTGGT<br>GAVQPAL | HLA-A*33:03 | PVVWRWQVLR | 10 | 182.9 | 6.09989 | frameshift insertion |
| Se004 | DNMT3B | NM_006892.3c.653_654insA                               | SGDGSSEYQGWEGVWNRGPRV<br>GKDDQGLLLVARHGGVLEGLH<br>LQATGYVWHAVGPPV<br>VWRWQVLRGLCRQTGGT<br>GAVQPAL | HLA-A*33:03 | QGEGVWNR   | 9  | 314.2 | 6.09989 | frameshift insertion |
| Se004 | DNMT3B | NM_006892.3c.653_654insA                               | SGDGSSEYQGWEGVWNRGPRV<br>GKDDQGLLLVARHGGVLEGLH<br>LQATGYVWHAVGPPV<br>VWRWQVLRGLCRQTGGT<br>GAVQPAL | HLA-A*33:03 | YQGWEGVWNR | 10 | 321.2 | 6.09989 | frameshift insertion |
| Se004 | DNMT3B | NM_006892.3c.653_654insA                               | SGDGSSEYQGWEGVWNRGPRV<br>GKDDQGLLLVARHGGVLEGLH<br>LQATGYVWHAVGPPV<br>VWRWQVLRGLCRQTGGT<br>GAVQPAL | HLA-A*33:03 | WEGVWNRGPR | 10 | 405.5 | 6.09989 | frameshift insertion |
| Se004 | DNMT3B | NM_006892.3c.653_654insA                               | SGDGSSEYQGWEGVWNRGPRV<br>GKDDQGLLLVARHGGVLEGLH<br>LQATGYVWHAVGPPV<br>VWRWQVLRGLCRQTGGT<br>GAVQPAL | HLA-B*40:02 | SEYQGWEGV  | 9  | 15.9  | 6.09989 | frameshift insertion |
| Se004 | DNMT3B | NM_006892.3c.653_654insA                               | SGDGSSEYQGWEGVWNRGPRV<br>GKDDQGLLLVARHGGVLEGLH<br>LQATGYVWHAVGPPV<br>VWRWQVLRGLCRQTGGT<br>GAVQPAL | HLA-B*40:02 | SSEYQGWEGV | 10 | 203.4 | 6.09989 | frameshift insertion |
| Se004 | DNMT3B | NM_006892.3c.653_654insA                               | SGDGSSEYQGWEGVWNRGPRV<br>GKDDQGLLLVARHGGVLEGLH<br>LQATGYVWHAVGPPV<br>VWRWQVLRGLCRQTGGT<br>GAVQPAL | HLA-B*44:03 | SEYQGWEGVW | 10 | 18.9  | 6.09989 | frameshift insertion |
| Se004 | DNMT3B | NM_006892.3c.653_654insA                               | SGDGSSEYQGWEGVWNRGPRV<br>GKDDQGLLLVARHGGVLEGLH<br>LQATGYVWHAVGPPV<br>VWRWQVLRGLCRQTGGT<br>GAVQPAL | HLA-B*44:03 | SEYQGWEGV  | 9  | 158.7 | 6.09989 | frameshift insertion |
| Se004 | DNMT3B | NM_006892.3c.653_654insA                               | SGDGSSEYQGWEGVWNRGPRV<br>GKDDQGLLLVARHGGVLEGLH<br>LQATGYVWHAVGPPV<br>VWRWQVLRGLCRQTGGT<br>GAVQPAL | HLA-B*44:03 | LEGLHATGY  | 10 | 482.6 | 6.09989 | frameshift insertion |
| Se004 | DNMT3B | NM_006892.3c.653_654insA                               | SGDGSSEYQGWEGVWNRGPRV<br>GKDDQGLLLVARHGGVLEGLH<br>LQATGYVWHAVGPPV<br>VWRWQVLRGLCRQTGGT<br>GAVQPAL | HLA-C*03:04 | YVWHAVGPPV | 9  | 60.1  | 6.09989 | frameshift insertion |

|       |        |                                                            |                                                                                  |             |             |    |       |         |                      |
|-------|--------|------------------------------------------------------------|----------------------------------------------------------------------------------|-------------|-------------|----|-------|---------|----------------------|
| Se004 | DNMT3B | NM_006892.3c.653_654insA                                   | SGDGSSEYQGWEGVWNRGPRVVKDQGLLLVARHGGVLEGLHQLATGYVWHAVGPVVWRWQVLRGLCRQTGGTGAVQPAL  | HLA-C*03:04 | LVARHGGVL   | 9  | 81.4  | 6.09989 | frameshift insertion |
| Se004 | DNMT3B | NM_006892.3c.653_654insA                                   | SGDGSSEYQGWEGVWNRGPRVVKDQGLLLVARHGGVLEGLHQLATGYVWHAVGPVVWRWQVLRGLCRQTGGTGAVQPAL  | HLA-C*14:03 | VWHAVGPVV   | 9  | 138.1 | 6.09989 | frameshift insertion |
| Se004 | DNMT3B | NM_006892.3c.653_654insA                                   | SGDGSSEYQGWEGVWNRGPRVVKDQGLLLVARHGGVLEGLHQLATGYVWHAVGPVVWRWQVLRGLCRQTGGTGAVQPAL  | HLA-C*14:03 | YVWHAVGPV   | 9  | 227.9 | 6.09989 | frameshift insertion |
| Se004 | DNMT3B | NM_006892.3c.653_654insA                                   | SGDGSSEYQGWEGVWNRGPRVVKDQGLLLVARHGGVLEGLHQLATGYVWHAVGPVVWRWQVLRGLCRQTGGTGAVQPAL  | HLA-C*14:03 | WRWQVLRGL   | 9  | 411.6 | 6.09989 | frameshift insertion |
| Se005 | GLIS3  | NM_001042413.1c.20_32delGCATGAGTCTCCA                      | MNGRSGTGHREPHRGLGWSVVITFLPSEPTPGLLAPRPVAAHRVPLWQALLTTSISRCPQEEGWLLRRTTWLRAASICLP | HLA-A*33:03 | EPTPGLLAPR  | 10 | 90.9  | 6.59104 | frameshift deletion  |
| Se005 | GLIS3  | NM_001042413.1c.20_32delGCATGAGTCTCCA                      | MNGRSGTGHREPHRGLGWSVVITFLPSEPTPGLLAPRPVAAHRVPLWQALLTTSISRCPQEEGWLLRRTTWLRAASICLP | HLA-A*33:03 | PTPGLLAPR   | 9  | 354   | 6.59104 | frameshift deletion  |
| Se005 | GLIS3  | NM_001042413.1c.20_32delGCATGAGTCTCCA                      | MNGRSGTGHREPHRGLGWSVVITFLPSEPTPGLLAPRPVAAHRVPLWQALLTTSISRCPQEEGWLLRRTTWLRAASICLP | HLA-C*14:03 | HRVPLWQAL   | 9  | 106.8 | 6.59104 | frameshift deletion  |
| Se005 | GLIS3  | NM_001042413.1c.20_32delGCATGAGTCTCCA                      | MNGRSGTGHREPHRGLGWSVVITFLPSEPTPGLLAPRPVAAHRVPLWQALLTTSISRCPQEEGWLLRRTTWLRAASICLP | HLA-A*33:03 | CTGHREPHR   | 9  | 472.7 | 6.59104 | frameshift deletion  |
| Se005 | GLIS3  | NM_001042413.1c.20_32delGCATGAGTCTCCA                      | MNGRSGTGHREPHRGLGWSVVITFLPSEPTPGLLAPRPVAAHRVPLWQALLTTSISRCPQEEGWLLRRTTWLRAASICLP | HLA-B*44:03 | EEGWLLRRTTW | 10 | 32.1  | 6.59104 | frameshift deletion  |
| Se005 | GLIS3  | NM_001042413.1c.20_32delGCATGAGTCTCCA                      | MNGRSGTGHREPHRGLGWSVVITFLPSEPTPGLLAPRPVAAHRVPLWQALLTTSISRCPQEEGWLLRRTTWLRAASICLP | HLA-A*33:03 | LAPRPVAAHR  | 10 | 163.1 | 6.59104 | frameshift deletion  |
| Se005 | GLIS3  | NM_001042413.1c.20_32delGCATGAGTCTCCA                      | MNGRSGTGHREPHRGLGWSVVITFLPSEPTPGLLAPRPVAAHRVPLWQALLTTSISRCPQEEGWLLRRTTWLRAASICLP | HLA-A*33:03 | NGRSGTGHR   | 9  | 320.3 | 6.59104 | frameshift deletion  |
| Se005 | GLIS3  | NM_001042413.1c.20_32delGCATGAGTCTCCA                      | MNGRSGTGHREPHRGLGWSVVITFLPSEPTPGLLAPRPVAAHRVPLWQALLTTSISRCPQEEGWLLRRTTWLRAASICLP | HLA-C*14:03 | RVPLWQALL   | 9  | 312.1 | 6.59104 | frameshift deletion  |
| Se005 | GLIS3  | NM_001042413.1c.20_32delGCATGAGTCTCCA                      | MNGRSGTGHREPHRGLGWSVVITFLPSEPTPGLLAPRPVAAHRVPLWQALLTTSISRCPQEEGWLLRRTTWLRAASICLP | HLA-A*33:03 | WLLRRTTWLR  | 9  | 26.3  | 6.59104 | frameshift deletion  |
| Se005 | GLIS3  | NM_001042413.1c.20_32delGCATGAGTCTCCA                      | MNGRSGTGHREPHRGLGWSVVITFLPSEPTPGLLAPRPVAAHRVPLWQALLTTSISRCPQEEGWLLRRTTWLRAASICLP | HLA-A*24:02 | LWQALLTTSI  | 10 | 398.3 | 6.59104 | frameshift deletion  |
| Se005 | GLIS3  | NM_001042413.1c.20_32delGCATGAGTCTCCA                      | MNGRSGTGHREPHRGLGWSVVITFLPSEPTPGLLAPRPVAAHRVPLWQALLTTSISRCPQEEGWLLRRTTWLRAASICLP | HLA-A*33:03 | GWLLRRTTWLR | 10 | 247.9 | 6.59104 | frameshift deletion  |
| Se005 | LURAP1 | NM_001013615.2c.469_497delGATGAACAGGGCCACC<br>TGGGGCTCCACG | SFLDTPAPSELFDRDLGKSYSWWREGQD                                                     | HLA-A*33:03 | GLGKSYSWWR  | 10 | 480.5 | 2.91834 | frameshift deletion  |
| Se005 | LURAP1 | NM_001013615.2c.469_497delGATGAACAGGGCCACC<br>TGGGGCTCCACG | SFLDTPAPSELFDRDLGKSYSWWREGQD                                                     | HLA-A*33:03 | LGKSYSWWR   | 9  | 49    | 2.91834 | frameshift deletion  |
| Se005 | LURAP1 | NM_001013615.2c.469_497delGATGAACAGGGCCACC<br>TGGGGCTCCACG | SFLDTPAPSELFDRDLGKSYSWWREGQD                                                     | HLA-A*33:03 | DTVAPSELFR  | 10 | 146.2 | 2.91834 | frameshift deletion  |
| Se005 | LURAP1 | NM_001013615.2c.469_497delGATGAACAGGGCCACC<br>TGGGGCTCCACG | SFLDTPAPSELFDRDLGKSYSWWREGQD                                                     | HLA-A*33:03 | TVAPSELFR   | 9  | 73.6  | 2.91834 | frameshift deletion  |
| Se005 | XPR1   | NM_004736.3c.19_30delCTC<br>TCCGCGCAC                      | MKFAEHITPEWRKQYIQ                                                                | HLA-A*24:02 | KFAEHITPEW  | 10 | 423.9 | 6.91713 | inframe deletion     |
| Se008 | ANGEL1 | NM_015305.3c.1280_1284del<br>CCATC                         | KVARLSDGSHCHLVRGPKFCP                                                            | HLA-C*03:04 | LSDGSCHL    | 9  | 304.3 | 3.32727 | frameshift deletion  |
| Se008 | ANGEL1 | NM_015305.3c.1280_1284del<br>CCATC                         | KVARLSDGSHCHLVRGPKFCP                                                            | HLA-A*02:01 | RLSDGSCHL   | 10 | 399.7 | 3.32727 | frameshift deletion  |
| Se008 | RPA1   | NM_002945.3c.558delC                                       | TSGGTQSKVVPLPASLLTSPSPGFVLLPT<br>KVRVPGATPEGKGSFSP                               | HLA-A*02:01 | LLTSPSPGFV  | 10 | 90    | 7.07572 | frameshift deletion  |

|       |         |                                  |                                                      |             |            |    |       |         |                     |
|-------|---------|----------------------------------|------------------------------------------------------|-------------|------------|----|-------|---------|---------------------|
| Se008 | RPA1    | NM_002945.3c.558delC             | TSGGTQSKVVPLPASLLTSPSGPFVVLVLT<br>KVRVSPGATPEGKGSFSP | HLA-B*54:01 | LPASLLTSPS | 10 | 100.9 | 7.07572 | flameshift deletion |
| Se008 | RPA1    | NM_002945.3c.558delC             | TSGGTQSKVVPLPASLLTSPSGPFVVLVLT<br>KVRVSPGATPEGKGSFSP | HLA-C*03:04 | LLTSPSGPF  | 9  | 432   | 7.07572 | flameshift deletion |
| Se008 | RPA1    | NM_002945.3c.558delC             | TSGGTQSKVVPLPASLLTSPSGPFVVLVLT<br>KVRVSPGATPEGKGSFSP | HLA-B*54:01 | SGPFVVLVLT | 10 | 358.2 | 7.07572 | flameshift deletion |
| Se008 | RPA1    | NM_002945.3c.558delC             | TSGGTQSKVVPLPASLLTSPSGPFVVLVLT<br>KVRVSPGATPEGKGSFSP | HLA-C*03:04 | LTSPSGPFV  | 9  | 447.7 | 7.07572 | flameshift deletion |
| Se008 | RPA1    | NM_002945.3c.558delC             | TSGGTQSKVVPLPASLLTSPSGPFVVLVLT<br>KVRVSPGATPEGKGSFSP | HLA-C*03:04 | KVVPLPASL  | 9  | 53.5  | 7.07572 | flameshift deletion |
| Se008 | RPA1    | NM_002945.3c.558delC             | TSGGTQSKVVPLPASLLTSPSGPFVVLVLT<br>KVRVSPGATPEGKGSFSP | HLA-B*54:01 | GPVVLVLT   | 9  | 366.1 | 7.07572 | flameshift deletion |
| Se008 | RPA1    | NM_002945.3c.558delC             | TSGGTQSKVVPLPASLLTSPSGPFVVLVLT<br>KVRVSPGATPEGKGSFSP | HLA-B*54:01 | LPASLLTSP  | 9  | 360.8 | 7.07572 | flameshift deletion |
| Se008 | RPA1    | NM_002945.3c.558delC             | TSGGTQSKVVPLPASLLTSPSGPFVVLVLT<br>KVRVSPGATPEGKGSFSP | HLA-B*54:01 | SPSGPFVLV  | 9  | 134.4 | 7.07572 | flameshift deletion |
| Se008 | RPA1    | NM_002945.3c.558delC             | TSGGTQSKVVPLPASLLTSPSGPFVVLVLT<br>KVRVSPGATPEGKGSFSP | HLA-A*02:01 | FVLVLTQV   | 9  | 96.7  | 7.07572 | flameshift deletion |
| Se008 | CCDC127 | NM_145265.2c.352_354delA<br>AG   | ISQGRKLVEEKLLEQERAQVMQ                               | HLA-A*02:01 | KLLEQERAQV | 10 | 134.6 | 8.62407 | inframe deletion    |
| Se011 | MKNK1   | NM_001135553.2c.284_285d<br>eITG | AGHSRSRVFREGDAVSVSGKQEHFGAD                          | HLA-C*14:03 | AGHSRSRVF  | 9  | 473.5 | 24.7116 | flameshift deletion |
| Se015 | DPYD    | NM_000110.3c.1411delA            | GLPEVDPETMQLVKHGYLVVMSLVWLT<br>LQWNR                 | HLA-A*02:01 | YLQVVMSLV  | 9  | 14.6  | 1.70835 | flameshift deletion |
| Se015 | DPYD    | NM_000110.3c.1411delA            | GLPEVDPETMQLVKHGYLVVMSLVWLT<br>LQWNR                 | HLA-A*02:01 | VMSLVWLT   | 9  | 132.3 | 1.70835 | flameshift deletion |
| Se015 | DPYD    | NM_000110.3c.1411delA            | GLPEVDPETMQLVKHGYLVVMSLVWLT<br>LQWNR                 | HLA-A*02:01 | VVMSLVWLT  | 10 | 96.6  | 1.70835 | flameshift deletion |
| Se015 | DPYD    | NM_000110.3c.1411delA            | GLPEVDPETMQLVKHGYLVVMSLVWLT<br>LQWNR                 | HLA-A*02:01 | GYLVVMSLV  | 10 | 184.8 | 1.70835 | flameshift deletion |
| Se015 | DPYD    | NM_000110.3c.1411delA            | GLPEVDPETMQLVKHGYLVVMSLVWLT<br>LQWNR                 | HLA-A*02:01 | YLQVVMSLVW | 10 | 428.1 | 1.70835 | flameshift deletion |
| Se015 | DPYD    | NM_000110.3c.1411delA            | GLPEVDPETMQLVKHGYLVVMSLVWLT<br>LQWNR                 | HLA-A*02:01 | VVMSLVWLT  | 9  | 125.3 | 1.70835 | flameshift deletion |
| Se015 | DPYD    | NM_000110.3c.1411delA            | GLPEVDPETMQLVKHGYLVVMSLVWLT<br>LQWNR                 | HLA-A*24:02 | HGYLVVMSL  | 10 | 164.6 | 1.70835 | flameshift deletion |
| Se015 | DPYD    | NM_000110.3c.1411delA            | GLPEVDPETMQLVKHGYLVVMSLVWLT<br>LQWNR                 | HLA-A*24:02 | GYLVVMSL   | 9  | 106.2 | 1.70835 | flameshift deletion |
| Se015 | ETNK2   | NM_001297762.1c.14delC           | MAVPLRPLSRARPFT                                      | HLA-B*07:02 | RPLSRARP   | 9  | 4.3   | 7.51746 | flameshift deletion |
| Se015 | ETNK2   | NM_001297762.1c.14delC           | MAVPLRPLSRARPFT                                      | HLA-B*07:02 | VPLRPLSRA  | 9  | 439.7 | 7.51746 | flameshift deletion |
| Se015 | ETNK2   | NM_001297760.1c.14delC           | MAVPLRPLSRARPFT                                      | HLA-B*07:02 | RPLSRARPFT | 10 | 64.5  | 7.51746 | flameshift deletion |
| Se015 | ETNK2   | NM_001297762.1c.14delC           | MAVPLRPLSRARPFT                                      | HLA-B*07:02 | LRPLSRARP  | 10 | 28.9  | 7.51746 | flameshift deletion |

|       |         |                                                              |                                                           |             |            |    |       |         |                     |
|-------|---------|--------------------------------------------------------------|-----------------------------------------------------------|-------------|------------|----|-------|---------|---------------------|
| Se015 | ETNK2   | NM_001297762.1c.14delC                                       | MAVPLRPLSRARPFT                                           | HLA-B*55:02 | VPLRPLSRA  | 9  | 90.3  | 7.51746 | flameshift deletion |
| Se015 | MYPOP   | NM_001012643.3c.1093delG                                     | GVIIAPRSEEGHPQPQRSLRTTPPHTSGE<br>KVSLHGKGAADGNLREIYYL     | HLA-B*07:02 | HPGPPQPRSL | 10 | 57    | 1.81718 | flameshift deletion |
| Se020 | BCL2L11 | NM_138621.4c.172_199delG<br>GCAGCCCTCAGGGCCCGC<br>TGGCCCCAC  | NHGGEGDSCPHLPALALLPDRPFSSL                                | HLA-B*07:02 | LLPDRPFSSL | 10 | 99.3  | 6.73969 | flameshift deletion |
| Se020 | BCL2L11 | NM_001204108.1c.172_199d<br>eGGCAGCCCTCAGGGCCC<br>GCTGCCCCAC | NHGGEGDSCPHLPALALLPDRPFSSL                                | HLA-B*07:02 | LPDRPFSSL  | 9  | 19.1  | 6.73969 | flameshift deletion |
| Se020 | BCL2L11 | NM_001204108.1c.172_199d<br>eGGCAGCCCTCAGGGCCC<br>GCTGCCCCAC | NHGGEGDSCPHLPALALLPDRPFSSL                                | HLA-B*40:02 | GEGDSCPHL  | 9  | 211.3 | 6.73969 | flameshift deletion |
| Se020 | BCL2L11 | NM_138621.4c.172_199delG<br>GCAGCCCTCAGGGCCCGC<br>TGGCCCCAC  | NHGGEGDSCPHLPALALLPDRPFSSL                                | HLA-C*03:04 | LPDRPFSSL  | 9  | 458.3 | 6.73969 | flameshift deletion |
| Se020 | BCL2L11 | NM_138621.4c.172_199delG<br>GCAGCCCTCAGGGCCCGC<br>TGGCCCCAC  | NHGGEGDSCPHLPALALLPDRPFSSL                                | HLA-A*31:01 | ALALLPDPR  | 10 | 401.5 | 6.73969 | flameshift deletion |
| Se020 | BCL2L11 | NM_138621.4c.172_199delG<br>GCAGCCCTCAGGGCCCGC<br>TGGCCCCAC  | NHGGEGDSCPHLPALALLPDRPFSSL                                | HLA-B*07:02 | CPHLPALALL | 10 | 51.4  | 6.73969 | flameshift deletion |
| Se020 | BCL2L11 | NM_138621.4c.172_199delG<br>GCAGCCCTCAGGGCCCGC<br>TGGCCCCAC  | NHGGEGDSCPHLPALALLPDRPFSSL                                | HLA-B*07:02 | CPHLPALAL  | 9  | 13.9  | 6.73969 | flameshift deletion |
| Se020 | BCL2L11 | NM_138621.4c.172_199delG<br>GCAGCCCTCAGGGCCCGC<br>TGGCCCCAC  | NHGGEGDSCPHLPALALLPDRPFSSL                                | HLA-A*31:01 | LALLPDPR   | 9  | 233.2 | 6.73969 | flameshift deletion |
| Se020 | BCL2L11 | NM_138622.3c.172_199delG<br>GCAGCCCTCAGGGCCCGC<br>TGGCCCCAC  | NHGGEGDSCPHLPALALLPDRPFSSL                                | HLA-B*07:02 | SCPHLPALAL | 10 | 15.5  | 6.73969 | flameshift deletion |
| Se020 | DYRK1A  | NM_130438.2c.1580_1584del<br>TCAGG                           | GASAISSWLAKLLHRSLLKLILFKKQPF<br>M                         | HLA-A*31:01 | SWLAKLLHR  | 10 | 89.9  | 9.41008 | flameshift deletion |
| Se020 | DYRK1A  | NM_130438.2c.1580_1584del<br>TCAGG                           | GASAISSWLAKLLHRSLLKLILFKKQPF<br>M                         | HLA-A*31:01 | RSLKLILFK  | 10 | 122.6 | 9.41008 | flameshift deletion |
| Se020 | DYRK1A  | NM_130438.2c.1580_1584del<br>TCAGG                           | GASAISSWLAKLLHRSLLKLILFKKQPF<br>M                         | HLA-A*31:01 | KLLHRSLLK  | 9  | 99.2  | 9.41008 | flameshift deletion |
| Se020 | DYRK1A  | NM_130438.2c.1580_1584del<br>TCAGG                           | GASAISSWLAKLLHRSLLKLILFKKQPF<br>M                         | HLA-A*31:01 | ISCSWLALK  | 10 | 298.9 | 9.41008 | flameshift deletion |
| Se020 | DYRK1A  | NM_130436.2c.1678_1682del<br>TCAGG                           | VRQQFPAPLGWH                                              | HLA-C*07:02 | VRQQFPAPL  | 9  | 152.9 | 9.41008 | flameshift deletion |
| Se020 | DYRK1A  | NM_130438.2c.1580_1584del<br>TCAGG                           | GASAISSWLAKLLHRSLLKLILFKKQPF<br>M                         | HLA-C*07:02 | HRSLLKLIL  | 9  | 199.8 | 9.41008 | flameshift deletion |
| Se020 | DYRK1A  | NM_130438.2c.1580_1584del<br>TCAGG                           | GASAISSWLAKLLHRSLLKLILFKKQPF<br>M                         | HLA-A*31:01 | LLKLILFKK  | 9  | 311.9 | 9.41008 | flameshift deletion |
| Se020 | DYRK1A  | NM_130438.2c.1580_1584del<br>TCAGG                           | GASAISSWLAKLLHRSLLKLILFKKQPF<br>M                         | HLA-A*31:01 | SLLKLILFK  | 9  | 405.7 | 9.41008 | flameshift deletion |
| Se020 | DYRK1A  | NM_130438.2c.1580_1584del<br>TCAGG                           | GASAISSWLAKLLHRSLLKLILFKKQPF<br>M                         | HLA-A*31:01 | WLAKLLHR   | 9  | 462   | 9.41008 | flameshift deletion |
| Se020 | DYRK1A  | NM_130438.2c.1580_1584del<br>TCAGG                           | GASAISSWLAKLLHRSLLKLILFKKQPF<br>M                         | HLA-C*03:04 | SAISSWL    | 9  | 26    | 9.41008 | flameshift deletion |
| Se020 | DYRK1A  | NM_130438.2c.1580_1584del<br>TCAGG                           | GASAISSWLAKLLHRSLLKLILFKKQPF<br>M                         | HLA-C*03:04 | ISCSWLAL   | 9  | 421.9 | 9.41008 | flameshift deletion |
| Se020 | WHSC1L1 | NM_023034.1c.2813_2828del<br>TAAGCATAGAAATGCC                | ESCPASFHPECQKAAGIVMTVKLARNYITS<br>RLFGSNWEITDGGQQRATPGLCH | HLA-A*31:01 | LARNYITSR  | 9  | 21.5  | 5.93497 | flameshift deletion |

|       |         |                                                           |                                                            |             |            |    |       |         |                       |
|-------|---------|-----------------------------------------------------------|------------------------------------------------------------|-------------|------------|----|-------|---------|-----------------------|
| Se020 | WHSC1L1 | NM_023034.1c.2813_2828del<br>TAAGCATAGAAATGCC             | ESCPASFHPECQKAAGIVMTVKLARNYITS<br>RLFGSNWEITDGGQQRSATPGLCH | HLA-A*31:01 | IVMTVKLARN | 10 | 338.2 | 5.93497 | flameshift deletion   |
| Se020 | WHSC1L1 | NM_023034.1c.2813_2828del<br>TAAGCATAGAAATGCC             | ESCPASFHPECQKAAGIVMTVKLARNYITS<br>RLFGSNWEITDGGQQRSATPGLCH | HLA-C*03:04 | KAAGIVMTV  | 9  | 39.8  | 5.93497 | flameshift deletion   |
| Se020 | WHSC1L1 | NM_023034.1c.2813_2828del<br>TAAGCATAGAAATGCC             | ESCPASFHPECQKAAGIVMTVKLARNYITS<br>RLFGSNWEITDGGQQRSATPGLCH | HLA-A*31:01 | IVMTVKLAR  | 9  | 15.2  | 5.93497 | flameshift deletion   |
| Se020 | WHSC1L1 | NM_023034.1c.2813_2828del<br>TAAGCATAGAAATGCC             | ESCPASFHPECQKAAGIVMTVKLARNYITS<br>RLFGSNWEITDGGQQRSATPGLCH | HLA-A*31:01 | KLARNYITSR | 10 | 15.9  | 5.93497 | flameshift deletion   |
| Se020 | WHSC1L1 | NM_023034.1c.2813_2828del<br>TAAGCATAGAAATGCC             | ESCPASFHPECQKAAGIVMTVKLARNYITS<br>RLFGSNWEITDGGQQRSATPGLCH | HLA-A*31:01 | GIVMTVKLAR | 10 | 76.1  | 5.93497 | flameshift deletion   |
| Se020 | WHSC1L1 | NM_023034.1c.2813_2828del<br>TAAGCATAGAAATGCC             | ESCPASFHPECQKAAGIVMTVKLARNYITS<br>RLFGSNWEITDGGQQRSATPGLCH | HLA-C*07:02 | ARNYITSRL  | 9  | 377.2 | 5.93497 | flameshift deletion   |
| Se020 | ZNF274  | NM_133502.2c.1087_1110del<br>TCCTCTACATTAGAAGAT<br>ACCTTG | KVQESSRDCALQGGVQEVQDTV                                     | HLA-B*40:02 | QESSRDCAL  | 9  | 479.5 | 4.8168  | inflammation deletion |
| Se023 | EBAG9   | NM_198120.2c.139_145delG<br>ATTATT                        | SGDQITLPTTVHQFLSRQMLKSGLPGMKM<br>HPPV                      | HLA-A*02:06 | MLKSGLPGM  | 9  | 209.5 | 23.8453 | flameshift deletion   |
| Se023 | EBAG9   | NM_198120.2c.139_145delG<br>ATTATT                        | SGDQITLPTTVHQFLSRQMLKSGLPGMKM<br>HPPV                      | HLA-B*55:02 | LPTTVHQFLS | 10 | 376.4 | 23.8453 | flameshift deletion   |
| Se023 | EBAG9   | NM_198120.2c.139_145delG<br>ATTATT                        | SGDQITLPTTVHQFLSRQMLKSGLPGMKM<br>HPPV                      | HLA-B*55:02 | LPGMKMHPPV | 10 | 37.2  | 23.8453 | flameshift deletion   |
| Se023 | EBAG9   | NM_198120.2c.139_145delG<br>ATTATT                        | SGDQITLPTTVHQFLSRQMLKSGLPGMKM<br>HPPV                      | HLA-A*02:06 | QMLKSGLPGM | 10 | 366.5 | 23.8453 | flameshift deletion   |
| Se023 | EBAG9   | NM_198120.2c.139_145delG<br>ATTATT                        | SGDQITLPTTVHQFLSRQMLKSGLPGMKM<br>HPPV                      | HLA-B*40:02 | HQFLSRQML  | 9  | 263.4 | 23.8453 | flameshift deletion   |
| Se023 | EBAG9   | NM_198120.2c.139_145delG<br>ATTATT                        | SGDQITLPTTVHQFLSRQMLKSGLPGMKM<br>HPPV                      | HLA-A*24:02 | TLPTTVHQF  | 9  | 271.6 | 23.8453 | flameshift deletion   |
| Se023 | SLC16A2 | NM_006517.4c.656_665delT<br>CCTGGGCCA                     | GCSFAFQPSLVTFNAAWVWPMVWCLLG<br>VAFSPCPSPSSSECWIRSSWPKPSRC  | HLA-C*03:03 | CSFAFQPSL  | 9  | 69.5  | 5.96938 | flameshift deletion   |
| Se023 | SLC16A2 | NM_006517.4c.656_665delT<br>CCTGGGCCA                     | GCSFAFQPSLVTFNAAWVWPMVWCLLG<br>VAFSPCPSPSSSECWIRSSWPKPSRC  | HLA-A*02:06 | NAAWVWPMV  | 9  | 97.4  | 5.96938 | flameshift deletion   |
| Se023 | SLC16A2 | NM_006517.4c.656_665delT<br>CCTGGGCCA                     | GCSFAFQPSLVTFNAAWVWPMVWCLLG<br>VAFSPCPSPSSSECWIRSSWPKPSRC  | HLA-A*02:06 | SLVTFNAA   | 9  | 37    | 5.96938 | flameshift deletion   |
| Se023 | SLC16A2 | NM_006517.4c.656_665delT<br>CCTGGGCCA                     | GCSFAFQPSLVTFNAAWVWPMVWCLLG<br>VAFSPCPSPSSSECWIRSSWPKPSRC  | HLA-A*02:06 | WVWPMVWCL  | 9  | 33.5  | 5.96938 | flameshift deletion   |
| Se023 | SLC16A2 | NM_006517.4c.656_665delT<br>CCTGGGCCA                     | GCSFAFQPSLVTFNAAWVWPMVWCLLG<br>VAFSPCPSPSSSECWIRSSWPKPSRC  | HLA-A*02:06 | FNAAWVWPM  | 9  | 13.5  | 5.96938 | flameshift deletion   |
| Se023 | SLC16A2 | NM_006517.4c.656_665delT<br>CCTGGGCCA                     | GCSFAFQPSLVTFNAAWVWPMVWCLLG<br>VAFSPCPSPSSSECWIRSSWPKPSRC  | HLA-A*02:06 | PMVWCLLGV  | 9  | 338.1 | 5.96938 | flameshift deletion   |
| Se023 | SLC16A2 | NM_006517.4c.656_665delT<br>CCTGGGCCA                     | GCSFAFQPSLVTFNAAWVWPMVWCLLG<br>VAFSPCPSPSSSECWIRSSWPKPSRC  | HLA-A*02:06 | CSFAFQPSL  | 9  | 392.3 | 5.96938 | flameshift deletion   |
| Se023 | SLC16A2 | NM_006517.4c.656_665delT<br>CCTGGGCCA                     | GCSFAFQPSLVTFNAAWVWPMVWCLLG<br>VAFSPCPSPSSSECWIRSSWPKPSRC  | HLA-B*55:02 | WPMVWCLLGV | 10 | 40.2  | 5.96938 | flameshift deletion   |
| Se023 | SLC16A2 | NM_006517.4c.656_665delT<br>CCTGGGCCA                     | GCSFAFQPSLVTFNAAWVWPMVWCLLG<br>VAFSPCPSPSSSECWIRSSWPKPSRC  | HLA-B*55:02 | QPSLVTFNA  | 10 | 424.2 | 5.96938 | flameshift deletion   |
| Se023 | SLC16A2 | NM_006517.4c.656_665delT<br>CCTGGGCCA                     | GCSFAFQPSLVTFNAAWVWPMVWCLLG<br>VAFSPCPSPSSSECWIRSSWPKPSRC  | HLA-A*24:02 | AWVWPMVWCL | 10 | 369.5 | 5.96938 | flameshift deletion   |

|       |         |                                  |                                                                             |             |             |    |       |         |                     |
|-------|---------|----------------------------------|-----------------------------------------------------------------------------|-------------|-------------|----|-------|---------|---------------------|
| Se023 | SLC16A2 | NM_006517.4c.656_665delTCTGGGCCA | GCSFAFQPSLVTTFNAAWVWPMVWCLLGVAFSPCPSPSSSECWIRSSWPKPSRC                      | HLA-A*02:06 | FNAAWVWPMV  | 10 | 11.6  | 5.96938 | flameshift deletion |
| Se023 | SLC16A2 | NM_006517.4c.656_665delTCTGGGCCA | GCSFAFQPSLVTTFNAAWVWPMVWCLLGVAFSPCPSPSSSECWIRSSWPKPSRC                      | HLA-C*03:03 | FNAAWVWPM   | 9  | 134.4 | 5.96938 | flameshift deletion |
| Se023 | SLC16A2 | NM_006517.4c.656_665delTCTGGGCCA | GCSFAFQPSLVTTFNAAWVWPMVWCLLGVAFSPCPSPSSSECWIRSSWPKPSRC                      | HLA-A*02:06 | WPMVWCLLGV  | 10 | 175.4 | 5.96938 | flameshift deletion |
| Se023 | SLC16A2 | NM_006517.4c.656_665delTCTGGGCCA | GCSFAFQPSLVTTFNAAWVWPMVWCLLGVAFSPCPSPSSSECWIRSSWPKPSRC                      | HLA-A*02:06 | CSFAFQPSLV  | 10 | 257.1 | 5.96938 | flameshift deletion |
| Se023 | SLC16A2 | NM_006517.4c.656_665delTCTGGGCCA | GCSFAFQPSLVTTFNAAWVWPMVWCLLGVAFSPCPSPSSSECWIRSSWPKPSRC                      | HLA-A*02:06 | FAFQPSLVTTF | 10 | 279.1 | 5.96938 | flameshift deletion |
| Se023 | SLC16A2 | NM_006517.4c.656_665delTCTGGGCCA | GCSFAFQPSLVTTFNAAWVWPMVWCLLGVAFSPCPSPSSSECWIRSSWPKPSRC                      | HLA-A*02:06 | LVTTFNAAWV  | 10 | 325.5 | 5.96938 | flameshift deletion |
| Se023 | SLC16A2 | NM_006517.4c.656_665delTCTGGGCCA | GCSFAFQPSLVTTFNAAWVWPMVWCLLGVAFSPCPSPSSSECWIRSSWPKPSRC                      | HLA-A*02:06 | AWVWPMVWCL  | 10 | 428.7 | 5.96938 | flameshift deletion |
| Se023 | SLC16A2 | NM_006517.4c.656_665delTCTGGGCCA | GCSFAFQPSLVTTFNAAWVWPMVWCLLGVAFSPCPSPSSSECWIRSSWPKPSRC                      | HLA-A*02:06 | MVWCLLGV    | 9  | 135.5 | 5.96938 | flameshift deletion |
| Se023 | SLC16A2 | NM_006517.4c.656_665delTCTGGGCCA | GCSFAFQPSLVTTFNAAWVWPMVWCLLGVAFSPCPSPSSSECWIRSSWPKPSRC                      | HLA-A*24:02 | AFQPSLVTTF  | 10 | 75    | 5.96938 | flameshift deletion |
| Se023 | SLC16A2 | NM_006517.4c.656_665delTCTGGGCCA | GCSFAFQPSLVTTFNAAWVWPMVWCLLGVAFSPCPSPSSSECWIRSSWPKPSRC                      | HLA-A*02:06 | WVWPMVWCLL  | 10 | 136.3 | 5.96938 | flameshift deletion |
| Se023 | SLC16A2 | NM_006517.4c.656_665delTCTGGGCCA | GCSFAFQPSLVTTFNAAWVWPMVWCLLGVAFSPCPSPSSSECWIRSSWPKPSRC                      | HLA-A*24:02 | WVWPMVWCLL  | 10 | 429.5 | 5.96938 | flameshift deletion |
| Se023 | SLC16A2 | NM_006517.4c.656_665delTCTGGGCCA | GCSFAFQPSLVTTFNAAWVWPMVWCLLGVAFSPCPSPSSSECWIRSSWPKPSRC                      | HLA-C*03:03 | FAFQPSLVT   | 9  | 54.6  | 5.96938 | flameshift deletion |
| Se023 | SLC16A2 | NM_006517.4c.656_665delTCTGGGCCA | GCSFAFQPSLVTTFNAAWVWPMVWCLLGVAFSPCPSPSSSECWIRSSWPKPSRC                      | HLA-B*55:02 | MVWCLLGV    | 9  | 411.7 | 5.96938 | flameshift deletion |
| Se023 | SLC16A2 | NM_006517.4c.656_665delTCTGGGCCA | GCSFAFQPSLVTTFNAAWVWPMVWCLLGVAFSPCPSPSSSECWIRSSWPKPSRC                      | HLA-B*55:02 | WPMVWCLLGV  | 9  | 102.4 | 5.96938 | flameshift deletion |
| Se023 | SLC16A2 | NM_006517.4c.656_665delTCTGGGCCA | GCSFAFQPSLVTTFNAAWVWPMVWCLLGVAFSPCPSPSSSECWIRSSWPKPSRC                      | HLA-A*24:02 | FQPSLVTTF   | 9  | 416   | 5.96938 | flameshift deletion |
| Se023 | SLC16A2 | NM_006517.4c.656_665delTCTGGGCCA | GCSFAFQPSLVTTFNAAWVWPMVWCLLGVAFSPCPSPSSSECWIRSSWPKPSRC                      | HLA-A*24:02 | VWPMVWCLL   | 9  | 35.6  | 5.96938 | flameshift deletion |
| Se023 | SLC16A2 | NM_006517.4c.656_665delTCTGGGCCA | GCSFAFQPSLVTTFNAAWVWPMVWCLLGVAFSPCPSPSSSECWIRSSWPKPSRC                      | HLA-A*02:06 | FQPSLVTTF   | 9  | 439.5 | 5.96938 | flameshift deletion |
| Se023 | ZNF396  | NM_001322290.1c.691delA          | MNGSQSSTYRGP MNKMVGLKRDKETLLGKNNRNMNVAKSLVRAQPLFYIRESTVER NLMHVTSVQRHSAEAQF | HLA-B*40:02 | VERNLMHVT   | 9  | 385.1 | 1.20368 | flameshift deletion |
| Se023 | ZNF396  | NM_145756.2c.691delA             | MNGSQSSTYRGP MNKMVGLKRDKETLLGKNNRNMNVAKSLVRAQPLFYIRESTVER NLMHVTSVQRHSAEAQF | HLA-A*02:06 | STVERNLMHV  | 10 | 33.2  | 1.20368 | flameshift deletion |
| Se023 | ZNF396  | NM_145756.2c.691delA             | MNGSQSSTYRGP MNKMVGLKRDKETLLGKNNRNMNVAKSLVRAQPLFYIRESTVER NLMHVTSVQRHSAEAQF | HLA-C*03:03 | KSLVRAQPL   | 9  | 383.5 | 1.20368 | flameshift deletion |
| Se023 | ZNF396  | NM_145756.2c.691delA             | MNGSQSSTYRGP MNKMVGLKRDKETLLGKNNRNMNVAKSLVRAQPLFYIRESTVER NLMHVTSVQRHSAEAQF | HLA-B*40:02 | RESTVERNLM  | 9  | 84.2  | 1.20368 | flameshift deletion |
| Se023 | ZNF396  | NM_001322290.1c.691delA          | MNGSQSSTYRGP MNKMVGLKRDKETLLGKNNRNMNVAKSLVRAQPLFYIRESTVER NLMHVTSVQRHSAEAQF | HLA-B*40:02 | RESTVERNLM  | 10 | 152.8 | 1.20368 | flameshift deletion |
| Se023 | ZNF396  | NM_001322290.1c.691delA          | MNGSQSSTYRGP MNKMVGLKRDKETLLGKNNRNMNVAKSLVRAQPLFYIRESTVER NLMHVTSVQRHSAEAQF | HLA-A*02:06 | LVRAQPLFYI  | 10 | 138.4 | 1.20368 | flameshift deletion |

|       |          |                                                      |                                                                                       |             |            |    |       |         |         |                      |
|-------|----------|------------------------------------------------------|---------------------------------------------------------------------------------------|-------------|------------|----|-------|---------|---------|----------------------|
| Se023 | PCDHA3   | NM_018906.2c.505_506insC                             | ADIGTNSLLTLQS                                                                         | HLA-C*03:03 | IGTNSLLTL  | 9  | 242.5 | 3.85798 |         | frameshift insertion |
| Se024 | HS1BP3   | NM_022460.3c.470_473delA<br>CAG                      | TSRDSSVLDGTVRQGMKRLSTFLRSKTK<br>WQKRVRSRA                                             | HLA-A*02:06 | GMMKRLSTFL | 10 | 207.4 |         | 7.33743 | frameshift deletion  |
| Se024 | HS1BP3   | NM_022460.3c.470_473delA<br>CAG                      | TSRDSSVLDGTVRQGMKRLSTFLRSKTK<br>WQKRVRSRA                                             | HLA-A*24:02 | GMMKRLSTF  | 9  | 308.7 |         | 7.33743 | frameshift deletion  |
| Se024 | HS1BP3   | NM_022460.3c.470_473delA<br>CAG                      | TSRDSSVLDGTVRQGMKRLSTFLRSKTK<br>WQKRVRSRA                                             | HLA-C*12:02 | MMKRLSTFL  | 9  | 381.7 |         | 7.33743 | frameshift deletion  |
| Se024 | HS1BP3   | NM_022460.3c.470_473delA<br>CAG                      | TSRDSSVLDGTVRQGMKRLSTFLRSKTK<br>WQKRVRSRA                                             | HLA-A*02:06 | MMKRLSTFL  | 9  | 364.9 |         | 7.33743 | frameshift deletion  |
| Se024 | SEC24A   | NM_021982.2c.2151_2158del<br>CTCTTACC                | YSAGSVYYYSSAQPSPSTEITEGTEIPYS<br>EDWL                                                 | HLA-C*12:02 | SVYYYSSA   | 9  | 356.3 |         | 2.44107 | frameshift deletion  |
| Se024 | SEC24A   | NM_021982.2c.2151_2158del<br>CTCTTACC                | YSAGSVYYYSSAQPSPSTEITEGTEIPYS<br>EDWL                                                 | HLA-C*12:02 | YSAGSVYYY  | 9  | 49.6  |         | 2.44107 | frameshift deletion  |
| Se024 | SEC24A   | NM_021982.2c.2151_2158del<br>CTCTTACC                | YSAGSVYYYSSAQPSPSTEITEGTEIPYS<br>EDWL                                                 | HLA-A*02:06 | SVYYYSSA   | 9  | 328.5 |         | 2.44107 | frameshift deletion  |
| Se024 | ARHGAP21 | NM_020824.3c.3550_3552del<br>AGA                     | EERGLEYTGIVPGNNAISSM                                                                  | HLA-A*02:06 | YVPGNNAI   | 9  | 219.9 | 9.46415 |         | inframe deletion     |
| Se024 | ARHGAP21 | NM_020824.3c.3550_3552del<br>AGA                     | EERGLEYTGIVPGNNAISSM                                                                  | HLA-C*08:01 | YVPGNNAI   | 9  | 474.7 | 9.46415 |         | inframe deletion     |
| Se024 | ARHGAP21 | NM_020824.3c.3550_3552del<br>AGA                     | EERGLEYTGIVPGNNAISSM                                                                  | HLA-C*12:02 | YVPGNNAI   | 9  | 309   | 9.46415 |         | inframe deletion     |
| Se026 | PCGF3    | NM_006315.5c.99_102delT<br>TG                        | YLIDATTVTECTPSAGAAW                                                                   | HLA-C*03:04 | YLIDATTVT  | 9  | 469.1 |         | 12.6523 | frameshift deletion  |
| Se034 | GEMIN5   | NM_015465.4c.2560_2570del<br>AGCCTGGACCA             | RKARSLPLSTQIQRGASSGLFGTSNCKAL<br>QRAE                                                 | HLA-A*33:03 | TSNCKALQR  | 9  | 388.7 |         | 4.82677 | frameshift deletion  |
| Se034 | GEMIN5   | NM_015465.4c.2560_2570del<br>AGCCTGGACCA             | RKARSLPLSTQIQRGASSGLFGTSNCKAL<br>QRAE                                                 | HLA-C*14:03 | FGTSNCKAL  | 9  | 477.4 |         | 4.82677 | frameshift deletion  |
| Se034 | GEMIN5   | NM_001252156.1c.2557_256<br>7delAGCCTGGACCA          | RKARSLPLSTQIQRGASSGLFGTSNCKAL<br>QRAE                                                 | HLA-B*39:01 | RKARSLPL   | 9  | 241.4 |         | 4.82677 | frameshift deletion  |
| Se034 | HDAC4    | NM_006037.3c.3088_3106del<br>TGCTGCAGCGCACAAACC<br>T | KVMEIHSKYWRPQRGVL                                                                     | HLA-A*33:03 | VMEIHSKYWR | 10 | 108.4 |         | 1.75335 | frameshift deletion  |
| Se034 | HDAC4    | NM_006037.3c.3088_3106del<br>TGCTGCAGCGCACAAACC<br>T | KVMEIHSKYWRPQRGVL                                                                     | HLA-C*14:03 | KYWRPQRGV  | 9  | 458.5 |         | 1.75335 | frameshift deletion  |
| Se034 | HDAC4    | NM_006037.3c.3088_3106del<br>TGCTGCAGCGCACAAACC<br>T | KVMEIHSKYWRPQRGVL                                                                     | HLA-C*14:03 | YWRPQRGVL  | 9  | 36    |         | 1.75335 | frameshift deletion  |
| Se034 | HDAC4    | NM_006037.3c.3088_3106del<br>TGCTGCAGCGCACAAACC<br>T | KVMEIHSKYWRPQRGVL                                                                     | HLA-C*07:02 | YWRPQRGVL  | 9  | 461.4 |         | 1.75335 | frameshift deletion  |
| Se034 | HDAC4    | NM_006037.3c.3088_3106del<br>TGCTGCAGCGCACAAACC<br>T | KVMEIHSKYWRPQRGVL                                                                     | HLA-A*33:03 | MEIHSKYWR  | 9  | 269.6 |         | 1.75335 | frameshift deletion  |
| Se034 | HDAC4    | NM_006037.3c.3088_3106del<br>TGCTGCAGCGCACAAACC<br>T | KVMEIHSKYWRPQRGVL                                                                     | HLA-A*33:03 | HSKYWRPQR  | 9  | 12.9  |         | 1.75335 | frameshift deletion  |
| Se034 | HDAC4    | NM_006037.3c.3088_3106del<br>TGCTGCAGCGCACAAACC<br>T | KVMEIHSKYWRPQRGVL                                                                     | HLA-A*33:03 | IHSKYWRPQR | 10 | 213.1 |         | 1.75335 | frameshift deletion  |
| Se034 | LRFN4    | NM_024036.4c.780_795delG<br>CCCGCCGTGGCCGGC          | RPDDLETCASPATSGQCPRASSPVSRLP<br>ATRSASGCWKASGPRCAGPWWTPRLPCT<br>GSVLTGTWLATPPEPLSPTGP | HLA-C*14:03 | RLPCTGSVL  | 9  | 152.5 |         | 17.9247 | frameshift deletion  |



|       |          |                                              |                                                                                      |             |             |    |       |         |                     |
|-------|----------|----------------------------------------------|--------------------------------------------------------------------------------------|-------------|-------------|----|-------|---------|---------------------|
| Se034 | LRFN4    | NM_024036.4c.780_795delG<br>CCCGCCTGGCCGGC   | RPDDLETASPATSGQCPRASSPVSRLP<br>ATRSASGCWKASGPRCGAGPWVTPRLPCT<br>GSVLTGWLATPPEGLSPTGP | HLA-A*33:03 | CGAGPWVTPR  | 10 | 127.2 | 17.9247 | flameshift deletion |
| Se034 | LRFN4    | NM_024036.4c.780_795delG<br>CCCGCCTGGCCGGC   | RPDDLETASPATSGQCPRASSPVSRLP<br>ATRSASGCWKASGPRCGAGPWVTPRLPCT<br>GSVLTGWLATPPEGLSPTGP | HLA-A*33:03 | VSRPSLPATR  | 10 | 462.3 | 17.9247 | flameshift deletion |
| Se034 | LRFN4    | NM_024036.4c.780_795delG<br>CCCGCCTGGCCGGC   | RPDDLETASPATSGQCPRASSPVSRLP<br>ATRSASGCWKASGPRCGAGPWVTPRLPCT<br>GSVLTGWLATPPEGLSPTGP | HLA-A*33:03 | GAGPWVTPR   | 9  | 331.8 | 17.9247 | flameshift deletion |
| Se035 | MZF1     | NM_198055.1c.1232_1245del<br>CGTTCGTGTGCCGC  | LRHQLTHTEERRLWPLRAQRAAPGRASES<br>AHGRTAFPLR                                          | HLA-A*31:01 | HQLTHTEER   | 9  | 245.3 | 4.14964 | flameshift deletion |
| Se035 | MZF1     | NM_198055.1c.1232_1245del<br>CGTTCGTGTGCCGC  | LRHQLTHTEERRLWPLRAQRAAPGRASES<br>AHGRTAFPLR                                          | HLA-C*03:03 | SAHGRTAFPL  | 10 | 445.4 | 4.14964 | flameshift deletion |
| Se035 | MZF1     | NM_198055.1c.1232_1245del<br>CGTTCGTGTGCCGC  | LRHQLTHTEERRLWPLRAQRAAPGRASES<br>AHGRTAFPLR                                          | HLA-A*26:01 | ESAHGRTAF   | 9  | 330.6 | 4.14964 | flameshift deletion |
| Se035 | MZF1     | NM_003422.2c.1232_1245del<br>CGTTCGTGTGCCGC  | LRHQLTHTEERRLWPLRAQRAAPGRASES<br>AHGRTAFPLR                                          | HLA-A*31:01 | GLRAQRAAPGR | 10 | 231.9 | 4.14964 | flameshift deletion |
| Se035 | MZF1     | NM_003422.2c.1232_1245del<br>CGTTCGTGTGCCGC  | LRHQLTHTEERRLWPLRAQRAAPGRASES<br>AHGRTAFPLR                                          | HLA-A*31:01 | RLWPLRAQR   | 10 | 13.3  | 4.14964 | flameshift deletion |
| Se035 | MZF1     | NM_003422.2c.1232_1245del<br>CGTTCGTGTGCCGC  | LRHQLTHTEERRLWPLRAQRAAPGRASES<br>AHGRTAFPLR                                          | HLA-A*31:01 | RASESAHGR   | 9  | 82.2  | 4.14964 | flameshift deletion |
| Se035 | MZF1     | NM_198055.1c.1232_1245del<br>CGTTCGTGTGCCGC  | LRHQLTHTEERRLWPLRAQRAAPGRASES<br>AHGRTAFPLR                                          | HLA-B*35:01 | ESAHGRTAF   | 9  | 270.1 | 4.14964 | flameshift deletion |
| Se035 | MZF1     | NM_003422.2c.1232_1245del<br>CGTTCGTGTGCCGC  | LRHQLTHTEERRLWPLRAQRAAPGRASES<br>AHGRTAFPLR                                          | HLA-A*31:01 | HGRTAFPLR   | 9  | 40.7  | 4.14964 | flameshift deletion |
| Se035 | MZF1     | NM_198055.1c.1232_1245del<br>CGTTCGTGTGCCGC  | LRHQLTHTEERRLWPLRAQRAAPGRASES<br>AHGRTAFPLR                                          | HLA-A*31:01 | AHGRTAFPLR  | 10 | 200   | 4.14964 | flameshift deletion |
| Se035 | MZF1     | NM_003422.2c.1232_1245del<br>CGTTCGTGTGCCGC  | LRHQLTHTEERRLWPLRAQRAAPGRASES<br>AHGRTAFPLR                                          | HLA-A*31:01 | RHQLTHTEER  | 10 | 208.7 | 4.14964 | flameshift deletion |
| Se035 | EWSR1    | NM_013986.3c.1356_1370del<br>GAAGCCTCCAATGAA | QGSKLVSLARNSMRGLPPRE                                                                 | HLA-A*31:01 | SMRGLPPR    | 9  | 13    | 23.421  | inframe deletion    |
| Se035 | EWSR1    | NM_013986.3c.1356_1370del<br>GAAGCCTCCAATGAA | QGSKLVSLARNSMRGLPPRE                                                                 | HLA-A*31:01 | VSLARNSMR   | 9  | 20.1  | 23.421  | inframe deletion    |
| Se035 | EWSR1    | NM_013986.3c.1356_1370del<br>GAAGCCTCCAATGAA | QGSKLVSLARNSMRGLPPRE                                                                 | HLA-A*31:01 | KVSLARNSMR  | 10 | 17.3  | 23.421  | inframe deletion    |
| Se035 | EWSR1    | NM_013986.3c.1356_1370del<br>GAAGCCTCCAATGAA | QGSKLVSLARNSMRGLPPRE                                                                 | HLA-A*31:01 | NSMRGLPPR   | 10 | 91    | 23.421  | inframe deletion    |
| Se035 | EWSR1    | NM_013986.3c.1356_1370del<br>GAAGCCTCCAATGAA | QGSKLVSLARNSMRGLPPRE                                                                 | HLA-A*31:01 | GSKLVSLAR   | 10 | 119.6 | 23.421  | inframe deletion    |
| Se035 | EWSR1    | NM_013986.3c.1356_1370del<br>GAAGCCTCCAATGAA | QGSKLVSLARNSMRGLPPRE                                                                 | HLA-A*31:01 | SMRGLPPRE   | 10 | 343.4 | 23.421  | inframe deletion    |
| Se037 | ZNF821   | NM_001201552.1c.245_253d<br>eTCAAAGTGG       | SSHTSEEDGGVEKELENTEQPV                                                               | HLA-B*40:02 | KELENTEQPV  | 10 | 89.8  | 1.73446 | inframe deletion    |
| Se037 | DNASE1L1 | NM_001009932.2c.291_302d<br>eGACGTATGTGTA    | SSPQLGRSTYMDFYRSHKTQVL                                                               | HLA-C*12:02 | YRSHKTQVL   | 9  | 263   | 6.15656 | inframe deletion    |
| Se039 | TP53     | NM_001276761.1c.56delC                       | PDDIEQWFTEDQVQMKLPECQRLLPPWPL<br>HQQLLHRRPLHQPPPGCHLLSLPRKPTRA<br>ATVSVWASCILGQPSL   | HLA-B*55:02 | LPPWPLHQQL  | 10 | 349.6 | 7.57655 | flameshift deletion |
| Se039 | TP53     | NM_001126114.2c.173delC                      | PDDIEQWFTEDQVQMKLPECQRLLPPWPL<br>HQQLLHRRPLHQPPPGCHLLSLPRKPTRA<br>ATVSVWASCILGQPSL   | HLA-A*02:06 | ATVSVWASCI  | 10 | 486.6 | 7.57655 | flameshift deletion |

|       |       |                                                  |                                                                                 |             |           |    |       |         |                      |
|-------|-------|--------------------------------------------------|---------------------------------------------------------------------------------|-------------|-----------|----|-------|---------|----------------------|
| Se039 | TP53  | NM_001276696.1c.56delC                           | PDDIEQWFTEDQVQMKLPECQRLPPWPL<br>HQQLHRRPLHQPPGCHLLSLPRKPTRA<br>ATVSVWASCILGQPSL | HLA-B*40:02 | QQLHRRPL  | 9  | 265.2 | 7.57655 | flameshift deletion  |
| Se039 | TP53  | NM_001276696.1c.56delC                           | PDDIEQWFTEDQVQMKLPECQRLPPWPL<br>HQQLHRRPLHQPPGCHLLSLPRKPTRA<br>ATVSVWASCILGQPSL | HLA-B*55:02 | LPRKPTRAA | 9  | 31.5  | 7.57655 | flameshift deletion  |
| Se039 | TP53  | NM_001276696.1c.56delC                           | PDDIEQWFTEDQVQMKLPECQRLPPWPL<br>HQQLHRRPLHQPPGCHLLSLPRKPTRA<br>ATVSVWASCILGQPSL | HLA-A*02:06 | CQRLPPWPL | 10 | 422.3 | 7.57655 | flameshift deletion  |
| Se039 | TP53  | NM_001276696.1c.56delC                           | PDDIEQWFTEDQVQMKLPECQRLPPWPL<br>HQQLHRRPLHQPPGCHLLSLPRKPTRA<br>ATVSVWASCILGQPSL | HLA-B*55:02 | LPRKPTRAA | 10 | 203.9 | 7.57655 | flameshift deletion  |
| Se039 | USP15 | NM_001252078.1c.2773_278<br>8delGCATATGTACTCTTCT | TASEQIVSKATRDKTLSELAFLLTEKL<br>KVLQPLASH                                        | HLA-A*02:06 | FLLTEKLV  | 10 | 368.9 | 9.11953 | flameshift deletion  |
| Se039 | USP15 | NM_006313.2c.2686_2701del<br>GCATATGTACTCTTCT    | TASEQIVSKATRDKTLSELAFLLTEKL<br>KVLQPLASH                                        | HLA-A*02:19 | FLLTEKLV  | 10 | 384.3 | 9.11953 | flameshift deletion  |
| Se039 | USP15 | NM_006313.2c.2686_2701del<br>GCATATGTACTCTTCT    | TASEQIVSKATRDKTLSELAFLLTEKL<br>KVLQPLASH                                        | HLA-B*40:02 | TEKLVQL   | 9  | 323.5 | 9.11953 | flameshift deletion  |
| Se039 | USP15 | NM_006313.2c.2686_2701del<br>GCATATGTACTCTTCT    | TASEQIVSKATRDKTLSELAFLLTEKL<br>KVLQPLASH                                        | HLA-A*02:19 | FLLTEKLV  | 10 | 413.4 | 9.11953 | flameshift deletion  |
| Se039 | USP15 | NM_006313.2c.2686_2701del<br>GCATATGTACTCTTCT    | TASEQIVSKATRDKTLSELAFLLTEKL<br>KVLQPLASH                                        | HLA-A*02:06 | LSVELAFFL | 9  | 35.6  | 9.11953 | flameshift deletion  |
| Se039 | USP15 | NM_006313.2c.2686_2701del<br>GCATATGTACTCTTCT    | TASEQIVSKATRDKTLSELAFLLTEKL<br>KVLQPLASH                                        | HLA-A*02:06 | FLLTEKLV  | 9  | 41.5  | 9.11953 | flameshift deletion  |
| Se039 | USP15 | NM_006313.2c.2686_2701del<br>GCATATGTACTCTTCT    | TASEQIVSKATRDKTLSELAFLLTEKL<br>KVLQPLASH                                        | HLA-A*02:06 | SVELAFFL  | 9  | 446.9 | 9.11953 | flameshift deletion  |
| Se039 | USP15 | NM_001252078.1c.2773_278<br>8delGCATATGTACTCTTCT | TASEQIVSKATRDKTLSELAFLLTEKL<br>KVLQPLASH                                        | HLA-A*02:06 | LSVELAFFL | 10 | 146.9 | 9.11953 | flameshift deletion  |
| Se039 | USP15 | NM_006313.2c.2686_2701del<br>GCATATGTACTCTTCT    | TASEQIVSKATRDKTLSELAFLLTEKL<br>KVLQPLASH                                        | HLA-B*40:02 | VELAFFLT  | 9  | 96.6  | 9.11953 | flameshift deletion  |
| Se039 | USP15 | NM_006313.2c.2686_2701del<br>GCATATGTACTCTTCT    | TASEQIVSKATRDKTLSELAFLLTEKL<br>KVLQPLASH                                        | HLA-A*02:06 | LSVELAFFL | 10 | 71.2  | 9.11953 | flameshift deletion  |
| Se039 | USP15 | NM_006313.2c.2686_2701del<br>GCATATGTACTCTTCT    | TASEQIVSKATRDKTLSELAFLLTEKL<br>KVLQPLASH                                        | HLA-A*02:06 | FLLTEKLV  | 10 | 230.8 | 9.11953 | flameshift deletion  |
| Se039 | USP15 | NM_006313.2c.2686_2701del<br>GCATATGTACTCTTCT    | TASEQIVSKATRDKTLSELAFLLTEKL<br>KVLQPLASH                                        | HLA-A*02:06 | SVELAFFLT | 10 | 427.4 | 9.11953 | flameshift deletion  |
| Se039 | USP15 | NM_006313.2c.2686_2701del<br>GCATATGTACTCTTCT    | TASEQIVSKATRDKTLSELAFLLTEKL<br>KVLQPLASH                                        | HLA-A*02:19 | LSVELAFFL | 10 | 20.2  | 9.11953 | flameshift deletion  |
| Se039 | USP15 | NM_006313.2c.2686_2701del<br>GCATATGTACTCTTCT    | TASEQIVSKATRDKTLSELAFLLTEKL<br>KVLQPLASH                                        | HLA-A*02:19 | FLLTEKLV  | 9  | 36.7  | 9.11953 | flameshift deletion  |
| Se039 | USP15 | NM_006313.2c.2686_2701del<br>GCATATGTACTCTTCT    | TASEQIVSKATRDKTLSELAFLLTEKL<br>KVLQPLASH                                        | HLA-B*40:02 | SVELAFFLT | 10 | 136.9 | 9.11953 | flameshift deletion  |
| Se039 | CAND1 | NM_018448.4c.2852_2854del<br>TTG                 | CEAEEGTRNVAECLGKLTLD                                                            | HLA-B*40:02 | AECLGKLT  | 9  | 35.3  | 36.0129 | inframe deletion     |
| Se039 | CAND1 | NM_018448.4c.2852_2854del<br>TTG                 | CEAEEGTRNVAECLGKLTLD                                                            | HLA-B*40:02 | AECLGKLT  | 10 | 219.8 | 36.0129 | inframe deletion     |
| Se039 | MCTP2 | NM_018349.3c.1083_1084ins                        | QLWNGIISITFVGREELRRKHDRDVCVPK<br>TGRSEV                                         | HLA-A*02:06 | QLWNGIIS  | 9  | 20    | 1.11272 | frameshift insertion |
| Se039 | MCTP2 | NM_018349.3c.1083_1084ins                        | QLWNGIISITFVGREELRRKHDRDVCVPK<br>TGRSEV                                         | HLA-A*02:19 | QLWNGIIS  | 9  | 19.8  | 1.11272 | frameshift insertion |

|       |         |                                              |                                                                                                                            |             |            |    |       |         |                      |
|-------|---------|----------------------------------------------|----------------------------------------------------------------------------------------------------------------------------|-------------|------------|----|-------|---------|----------------------|
| Se039 | MCTP2   | NM_018349.3c.1083_1084ins                    | QLWNGIISITFVGREELRRKHDRDVCVK<br>TGRSEV                                                                                     | HLA-B*55:02 | CPVKTGRSEV | 10 | 308.7 | 1.11272 | frameshift insertion |
| Se044 | AGRN    | NM_001305275.1c.3408delC                     | SNCPATKVFQGSWSWRASRARSCTRPR<br>WLTPSQNSGSRQPGALRAPWTTSSGIQTS<br>RRIFGVSACGTWGPANPSAPLWMCTLTPP<br>QPSGHPTWPGPCSGRSRCPGAGPWG | HLA-A*31:01 | TSSGIQTSR  | 9  | 114.5 | 109.468 | frameshift deletion  |
| Se044 | AGRN    | NM_001305275.1c.3408delC                     | SNCPATKVFQGSWSWRASRARSCTRPR<br>WLTPSQNSGSRQPGALRAPWTTSSGIQTS<br>RRIFGVSACGTWGPANPSAPLWMCTLTPP<br>QPSGHPTWPGPCSGRSRCPGAGPWG | HLA-A*31:01 | VFQGSWSWR  | 9  | 29.4  | 109.468 | frameshift deletion  |
| Se044 | AGRN    | NM_001305275.1c.3408delC                     | SNCPATKVFQGSWSWRASRARSCTRPR<br>WLTPSQNSGSRQPGALRAPWTTSSGIQTS<br>RRIFGVSACGTWGPANPSAPLWMCTLTPP<br>QPSGHPTWPGPCSGRSRCPGAGPWG | HLA-A*31:01 | ASRARSCTR  | 10 | 37.3  | 109.468 | frameshift deletion  |
| Se044 | AGRN    | NM_001305275.1c.3408delC                     | SNCPATKVFQGSWSWRASRARSCTRPR<br>WLTPSQNSGSRQPGALRAPWTTSSGIQTS<br>RRIFGVSACGTWGPANPSAPLWMCTLTPP<br>QPSGHPTWPGPCSGRSRCPGAGPWG | HLA-A*31:01 | KVFQGSWSWR | 10 | 9.9   | 109.468 | frameshift deletion  |
| Se044 | AGRN    | NM_001305275.1c.3408delC                     | SNCPATKVFQGSWSWRASRARSCTRPR<br>WLTPSQNSGSRQPGALRAPWTTSSGIQTS<br>RRIFGVSACGTWGPANPSAPLWMCTLTPP<br>QPSGHPTWPGPCSGRSRCPGAGPWG | HLA-A*31:01 | SGRQPGALR  | 9  | 88    | 109.468 | frameshift deletion  |
| Se044 | AGRN    | NM_001305275.1c.3408delC                     | SNCPATKVFQGSWSWRASRARSCTRPR<br>WLTPSQNSGSRQPGALRAPWTTSSGIQTS<br>RRIFGVSACGTWGPANPSAPLWMCTLTPP<br>QPSGHPTWPGPCSGRSRCPGAGPWG | HLA-A*31:01 | SSGIQTSRR  | 9  | 350.6 | 109.468 | frameshift deletion  |
| Se044 | AGRN    | NM_001305275.1c.3408delC                     | SNCPATKVFQGSWSWRASRARSCTRPR<br>WLTPSQNSGSRQPGALRAPWTTSSGIQTS<br>RRIFGVSACGTWGPANPSAPLWMCTLTPP<br>QPSGHPTWPGPCSGRSRCPGAGPWG | HLA-C*03:04 | SAPLWMCTL  | 9  | 114.3 | 109.468 | frameshift deletion  |
| Se044 | AGRN    | NM_001305275.1c.3408delC                     | SNCPATKVFQGSWSWRASRARSCTRPR<br>WLTPSQNSGSRQPGALRAPWTTSSGIQTS<br>RRIFGVSACGTWGPANPSAPLWMCTLTPP<br>QPSGHPTWPGPCSGRSRCPGAGPWG | HLA-A*31:01 | WSWRASRAR  | 9  | 57    | 109.468 | frameshift deletion  |
| Se044 | AGRN    | NM_001305275.1c.3408delC                     | SNCPATKVFQGSWSWRASRARSCTRPR<br>WLTPSQNSGSRQPGALRAPWTTSSGIQTS<br>RRIFGVSACGTWGPANPSAPLWMCTLTPP<br>QPSGHPTWPGPCSGRSRCPGAGPWG | HLA-A*31:01 | GSWSWRASR  | 9  | 4.7   | 109.468 | frameshift deletion  |
| Se044 | AGRN    | NM_001305275.1c.3408delC                     | SNCPATKVFQGSWSWRASRARSCTRPR<br>WLTPSQNSGSRQPGALRAPWTTSSGIQTS<br>RRIFGVSACGTWGPANPSAPLWMCTLTPP<br>QPSGHPTWPGPCSGRSRCPGAGPWG | HLA-A*31:01 | TTSSGIQTSR | 10 | 319.8 | 109.468 | frameshift deletion  |
| Se044 | AGRN    | NM_001305275.1c.3408delC                     | SNCPATKVFQGSWSWRASRARSCTRPR<br>WLTPSQNSGSRQPGALRAPWTTSSGIQTS<br>RRIFGVSACGTWGPANPSAPLWMCTLTPP<br>QPSGHPTWPGPCSGRSRCPGAGPWG | HLA-A*31:01 | CSGRQPGALR | 10 | 170.7 | 109.468 | frameshift deletion  |
| Se044 | AGRN    | NM_001305275.1c.3408delC                     | SNCPATKVFQGSWSWRASRARSCTRPR<br>WLTPSQNSGSRQPGALRAPWTTSSGIQTS<br>RRIFGVSACGTWGPANPSAPLWMCTLTPP<br>QPSGHPTWPGPCSGRSRCPGAGPWG | HLA-A*31:01 | GSWSWRASRA | 10 | 82.7  | 109.468 | frameshift deletion  |
| Se044 | AGRN    | NM_001305275.1c.3408delC                     | SNCPATKVFQGSWSWRASRARSCTRPR<br>WLTPSQNSGSRQPGALRAPWTTSSGIQTS<br>RRIFGVSACGTWGPANPSAPLWMCTLTPP<br>QPSGHPTWPGPCSGRSRCPGAGPWG | HLA-A*31:01 | SWSWRASRAR | 10 | 65.1  | 109.468 | frameshift deletion  |
| Se044 | AGRN    | NM_001305275.1c.3408delC                     | SNCPATKVFQGSWSWRASRARSCTRPR<br>WLTPSQNSGSRQPGALRAPWTTSSGIQTS<br>RRIFGVSACGTWGPANPSAPLWMCTLTPP<br>QPSGHPTWPGPCSGRSRCPGAGPWG | HLA-A*24:02 | IFGVSACGTW | 10 | 389.4 | 109.468 | frameshift deletion  |
| Se044 | AGRN    | NM_001305275.1c.3408delC                     | SNCPATKVFQGSWSWRASRARSCTRPR<br>WLTPSQNSGSRQPGALRAPWTTSSGIQTS<br>RRIFGVSACGTWGPANPSAPLWMCTLTPP<br>QPSGHPTWPGPCSGRSRCPGAGPWG | HLA-A*31:01 | RARSCTRPR  | 10 | 22.2  | 109.468 | frameshift deletion  |
| Se044 | AGRN    | NM_198576.3c.3408delC                        | SNCPATKVFQGSWSWRASRARSCTRPR<br>WLTPSQNSGSRQPGALRAPWTTSSGIQTS<br>RRIFGVSACGTWGPANPSAPLWMCTLTPP<br>QPSGHPTWPGPCSGRSRCPGAGPWG | HLA-A*31:01 | QGSWSWRASR | 10 | 16.9  | 109.468 | frameshift deletion  |
| Se044 | RAI14   | NM_001145522.1c.2345_2346delTG               | VSVLASKLKEREREGPFRGCPD                                                                                                     | HLA-A*31:01 | ASKLKERER  | 9  | 92    | 11.5451 | frameshift deletion  |
| Se044 | RAI14   | NM_001145521.1c.2432_2433delTG               | VSVLASKLKEREREGPFRGCPD                                                                                                     | HLA-A*31:01 | KLKERERER  | 9  | 66.5  | 11.5451 | frameshift deletion  |
| Se044 | SHROOM3 | NM_020859.3c.4785_4805delGACTGGCTTCCAGACTCCA | PGAHVVSQTSIKGSEAEESTP                                                                                                      | HLA-C*03:04 | HVVVSQTSI  | 9  | 254.7 | 7.25097 | inframe deletion     |
| Se044 | FBXO21  | NM_033624.2c.935_955delCTCGGCAGTTGGGAGTCCAC  | PISMSLLYLITIVPVNFPESHFL                                                                                                    | HLA-A*24:02 | LYLITIVPV  | 9  | 266.4 | 13.6141 | inframe deletion     |
| Se044 | FBXO21  | NM_033624.2c.935_955delCTCGGCAGTTGGGAGTCCAC  | PISMSLLYLITIVPVNFPESHFL                                                                                                    | HLA-B*52:01 | ISMSLLYLTI | 10 | 485.7 | 13.6141 | inframe deletion     |
| Se044 | MYCBP2  | NM_015057.4c.13619_13627delCATATTATG         | NDPAGYAMNRYCYKCRKAYFG                                                                                                      | HLA-A*24:02 | CYKCRKAYF  | 9  | 266.6 | 5.39712 | inframe deletion     |

|       |         |                                                                   |                                                            |             |            |    |       |         |                     |
|-------|---------|-------------------------------------------------------------------|------------------------------------------------------------|-------------|------------|----|-------|---------|---------------------|
| Se044 | MYCBP2  | NM_015057.4c.13619_13627delCATATTATG                              | NDPAGYAMNRYVYKCRKAYFG                                      | HLA-A*31:01 | AMNRYVYK   | 9  | 15.3  | 5.39712 | inframe deletion    |
| Se044 | MYCBP2  | NM_015057.4c.13619_13627delCATATTATG                              | NDPAGYAMNRYVYKCRKAYFG                                      | HLA-A*31:01 | RYVYKCRK   | 9  | 57.5  | 5.39712 | inframe deletion    |
| Se044 | MYCBP2  | NM_015057.4c.13619_13627delCATATTATG                              | NDPAGYAMNRYVYKCRKAYFG                                      | HLA-C*03:04 | YAMNRYVY   | 9  | 205.3 | 5.39712 | inframe deletion    |
| Se044 | MYCBP2  | NM_015057.4c.13619_13627delCATATTATG                              | NDPAGYAMNRYVYKCRKAYFG                                      | HLA-C*12:02 | YAMNRYVY   | 9  | 32.7  | 5.39712 | inframe deletion    |
| Se044 | MYCBP2  | NM_015057.4c.13619_13627delCATATTATG                              | NDPAGYAMNRYVYKCRKAYFG                                      | HLA-A*31:01 | YAMNRYVYK  | 10 | 39    | 5.39712 | inframe deletion    |
| Se044 | MYCBP2  | NM_015057.4c.13619_13627delCATATTATG                              | NDPAGYAMNRYVYKCRKAYFG                                      | HLA-A*31:01 | MNRYVYKCR  | 10 | 46.9  | 5.39712 | inframe deletion    |
| Se050 | ARHGEF7 | NM_001113512.2c.493_512delCGTGTGGAGAGGGGAGGCTG                    | SFSKGDVIHVTGGHTQRPDLVPPQLRARGQGQREACVSQIRNTEEPSQRI         | HLA-B*07:02 | RPDLVPPQL  | 10 | 17.6  | 4.94892 | flameshift deletion |
| Se050 | CA11    | NM_001217.4c.420_424delCAGACG                                     | LSELRLIFGARSRLGTSDQPPGLLC                                  | HLA-C*03:04 | LLFGARSRL  | 9  | 369.5 | 3.46632 | flameshift deletion |
| Se050 | IQGAP1  | NM_003870.3c.1180_1195delCTGATTAATGCTGCAA                         | QQYQRRLAAVASRRVLLRRLFWN                                    | HLA-C*07:02 | RRVLLRRLF  | 9  | 126.3 | 27.7298 | flameshift deletion |
| Se050 | IQGAP1  | NM_003870.3c.1180_1195delCTGATTAATGCTGCAA                         | QQYQRRLAAVASRRVLLRRLFWN                                    | HLA-B*07:02 | AAVASRRVL  | 9  | 130.1 | 27.7298 | flameshift deletion |
| Se050 | IQGAP1  | NM_003870.3c.1180_1195delCTGATTAATGCTGCAA                         | QQYQRRLAAVASRRVLLRRLFWN                                    | HLA-C*03:04 | AAVASRRVL  | 9  | 76.2  | 27.7298 | flameshift deletion |
| Se050 | IQGAP1  | NM_003870.3c.1180_1195delCTGATTAATGCTGCAA                         | QQYQRRLAAVASRRVLLRRLFWN                                    | HLA-C*03:04 | LAASRRV    | 9  | 379   | 27.7298 | flameshift deletion |
| Se050 | IRS1    | NM_005544.2c.3587_3599delCCCCTGAACCGCA                            | VKDFKQCPQECSLPHPHLINPWAAVRAAPPAAQVRI                       | HLA-B*07:02 | HPHPLINPWA | 10 | 484.5 | 3.41291 | flameshift deletion |
| Se050 | IRS1    | NM_005544.2c.3587_3599delCCCCTGAACCGCA                            | VKDFKQCPQECSLPHPHLINPWAAVRAAPPAAQVRI                       | HLA-B*07:02 | INPWAAVRAA | 10 | 379.4 | 3.41291 | flameshift deletion |
| Se050 | IRS1    | NM_005544.2c.3587_3599delCCCCTGAACCGCA                            | VKDFKQCPQECSLPHPHLINPWAAVRAAPPAAQVRI                       | HLA-B*07:02 | NPWAAVRAA  | 9  | 101.7 | 3.41291 | flameshift deletion |
| Se050 | IRS1    | NM_005544.2c.3587_3599delCCCCTGAACCGCA                            | VKDFKQCPQECSLPHPHLINPWAAVRAAPPAAQVRI                       | HLA-B*07:02 | HPHPLINPW  | 9  | 353.4 | 3.41291 | flameshift deletion |
| Se050 | IRS1    | NM_005544.2c.3587_3599delCCCCTGAACCGCA                            | VKDFKQCPQECSLPHPHLINPWAAVRAAPPAAQVRI                       | HLA-C*03:04 | CSLPHPHPL  | 9  | 21.1  | 3.41291 | flameshift deletion |
| Se050 | IRS1    | NM_005544.2c.3587_3599delCCCCTGAACCGCA                            | VKDFKQCPQECSLPHPHLINPWAAVRAAPPAAQVRI                       | HLA-B*07:02 | HPLINPWA   | 10 | 48.1  | 3.41291 | flameshift deletion |
| Se050 | IRS1    | NM_005544.2c.3587_3599delCCCCTGAACCGCA                            | VKDFKQCPQECSLPHPHLINPWAAVRAAPPAAQVRI                       | HLA-C*03:04 | RAAPPAAQV  | 9  | 33.5  | 3.41291 | flameshift deletion |
| Se050 | ROBO4   | NM_019055.5c.1570_1607delTGGTTGGCAGACACTTGGCGTTCACCTCTGGCTCTCG    | LKHRMDHSDSQPEQQQQPQASGGGCGPTRLSSLLALLGLPKPRRAPASRHQHLWLPHR | HLA-B*07:02 | APASRHQHF  | 9  | 62.7  | 1.42142 | flameshift deletion |
| Se050 | ROBO4   | NM_001301088.1c.1135_1172delTGGTTGGCAGACACTTGGCGTTCACCTCTGGCTCTCG | LKHRMDHSDSQPEQQQQPQASGGGCGPTRLSSLLALLGLPKPRRAPASRHQHLWLPHR | HLA-B*07:02 | LPKPRRAPA  | 9  | 29.2  | 1.42142 | flameshift deletion |
| Se050 | ROBO4   | NM_001301088.1c.1135_1172delTGGTTGGCAGACACTTGGCGTTCACCTCTGGCTCTCG | LKHRMDHSDSQPEQQQQPQASGGGCGPTRLSSLLALLGLPKPRRAPASRHQHLWLPHR | HLA-B*07:02 | GTRLSSLL   | 9  | 50.7  | 1.42142 | flameshift deletion |
| Se050 | ROBO4   | NM_001301088.1c.1135_1172delTGGTTGGCAGACACTTGGCGTTCACCTCTGGCTCTCG | LKHRMDHSDSQPEQQQQPQASGGGCGPTRLSSLLALLGLPKPRRAPASRHQHLWLPHR | HLA-C*07:02 | SRHQHLWL   | 9  | 27.4  | 1.42142 | flameshift deletion |

|       |          |                                                                            |                                                                       |             |            |    |       |         |                       |
|-------|----------|----------------------------------------------------------------------------|-----------------------------------------------------------------------|-------------|------------|----|-------|---------|-----------------------|
| Se050 | ROBO4    | NM_019055.5c.1570_1607del<br>TGGTTGGCAGACACTTGG<br>CGTTCACCTCTGGCTCT<br>CG | LKHRMDHSDSQPEQQQQPQASAGGGCP<br>GPTRLSSLLALLGLPKPRRAPASRHQHFLW<br>LPHR | HLA-B*07:02 | GLPKPRRAPA | 10 | 423   | 1.42142 | flameshift deletion   |
| Se050 | ROBO4    | NM_019055.5c.1570_1607del<br>TGGTTGGCAGACACTTGG<br>CGTTCACCTCTGGCTCT<br>CG | LKHRMDHSDSQPEQQQQPQASAGGGCP<br>GPTRLSSLLALLGLPKPRRAPASRHQHFLW<br>LPHR | HLA-B*07:02 | RAPASRHQHF | 10 | 132.6 | 1.42142 | flameshift deletion   |
| Se050 | ROBO4    | NM_019055.5c.1570_1607del<br>TGGTTGGCAGACACTTGG<br>CGTTCACCTCTGGCTCT<br>CG | LKHRMDHSDSQPEQQQQPQASAGGGCP<br>GPTRLSSLLALLGLPKPRRAPASRHQHFLW<br>LPHR | HLA-B*07:02 | APASRHQHF  | 10 | 41.5  | 1.42142 | flameshift deletion   |
| Se050 | ROBO4    | NM_019055.5c.1570_1607del<br>TGGTTGGCAGACACTTGG<br>CGTTCACCTCTGGCTCT<br>CG | LKHRMDHSDSQPEQQQQPQASAGGGCP<br>GPTRLSSLLALLGLPKPRRAPASRHQHFLW<br>LPHR | HLA-B*07:02 | CPGPTRLSSL | 10 | 19    | 1.42142 | flameshift deletion   |
| Se050 | ROBO4    | NM_019055.5c.1570_1607del<br>TGGTTGGCAGACACTTGG<br>CGTTCACCTCTGGCTCT<br>CG | LKHRMDHSDSQPEQQQQPQASAGGGCP<br>GPTRLSSLLALLGLPKPRRAPASRHQHFLW<br>LPHR | HLA-C*07:02 | TRLSSLLAL  | 9  | 137.9 | 1.42142 | flameshift deletion   |
| Se050 | ZBTB44   | NM_001301099.1c.1228delC                                                   | FQCPTCGVRFTVFRT                                                       | HLA-B*07:02 | CPTCGVRFTV | 10 | 401.8 | 7.45391 | flameshift deletion   |
| Se050 | TNS1     | NM_022648.5c.4477_4500del<br>TTCCGAGGCGGTACGGG<br>CTGGCC                   | PGAFIIRDShSMKVSSPPPTIM                                                | HLA-C*03:04 | FIIRDShSM  | 9  | 11    | 3.62945 | inflammation deletion |
| Se050 | TNS1     | NM_022648.5c.4477_4500del<br>TTCCGAGGCGGTACGGG<br>CTGGCC                   | PGAFIIRDShSMKVSSPPPTIM                                                | HLA-C*03:04 | VSSPPPTIM  | 9  | 58.7  | 3.62945 | inflammation deletion |
| Se050 | TNS1     | NM_022648.5c.4477_4500del<br>TTCCGAGGCGGTACGGG<br>CTGGCC                   | PGAFIIRDShSMKVSSPPPTIM                                                | HLA-C*07:02 | IRDShSMKV  | 9  | 425.3 | 3.62945 | inflammation deletion |
| Se051 | BRCA1    | NM_007300.3c.803delA                                                       | HPEKYQGSSVSTCMWSHVAQILMPAHYS<br>MRTAVYYSLKTE                          | HLA-C*03:04 | YSMRTAVYY  | 9  | 300.6 | 1.02829 | flameshift deletion   |
| Se051 | BRCA1    | NM_007297.3c.662delA                                                       | HPEKYQGSSVSTCMWSHVAQILMPAHYS<br>MRTAVYYSLKTE                          | HLA-B*07:02 | MPAHYSMRTA | 10 | 120.1 | 1.02829 | flameshift deletion   |
| Se051 | BRCA1    | NM_007300.3c.803delA                                                       | HPEKYQGSSVSTCMWSHVAQILMPAHYS<br>MRTAVYYSLKTE                          | HLA-A*24:02 | MWSHVAQIL  | 9  | 296.1 | 1.02829 | flameshift deletion   |
| Se051 | BRCA1    | NM_007297.3c.662delA                                                       | HPEKYQGSSVSTCMWSHVAQILMPAHYS<br>MRTAVYYSLKTE                          | HLA-C*07:02 | HYSMRTAVY  | 9  | 139.4 | 1.02829 | flameshift deletion   |
| Se051 | BRCA1    | NM_007300.3c.803delA                                                       | HPEKYQGSSVSTCMWSHVAQILMPAHYS<br>MRTAVYYSLKTE                          | HLA-C*03:04 | WSHVAQILM  | 9  | 138.8 | 1.02829 | flameshift deletion   |
| Se051 | BRCA1    | NM_007297.3c.662delA                                                       | HPEKYQGSSVSTCMWSHVAQILMPAHYS<br>MRTAVYYSLKTE                          | HLA-C*07:02 | MRTAVYYSL  | 9  | 86.3  | 1.02829 | flameshift deletion   |
| Se051 | BRCA1    | NM_007300.3c.803delA                                                       | HPEKYQGSSVSTCMWSHVAQILMPAHYS<br>MRTAVYYSLKTE                          | HLA-B*07:02 | HPEKYQGSSV | 10 | 61    | 1.02829 | flameshift deletion   |
| Se051 | BRCA1    | NM_007300.3c.803delA                                                       | HPEKYQGSSVSTCMWSHVAQILMPAHYS<br>MRTAVYYSLKTE                          | HLA-C*03:04 | ILMPAHYSM  | 9  | 27    | 1.02829 | flameshift deletion   |
| Se051 | KIAA1161 | NM_020702.4c.1263_1284del<br>GCTGGTGCGCTGGTGGAA<br>CGGC                    | FVREPTGRLPASARC                                                       | HLA-C*03:04 | FVREPTGRL  | 9  | 144.7 | 9.34659 | flameshift deletion   |
| Se051 | KIAA1161 | NM_020702.4c.1263_1284del<br>GCTGGTGCGCTGGTGGAA<br>CGGC                    | FVREPTGRLPASARC                                                       | HLA-B*40:02 | REPTGRLPA  | 9  | 414.4 | 9.34659 | flameshift deletion   |
| Se051 | KIAA1161 | NM_020702.4c.1263_1284del<br>GCTGGTGCGCTGGTGGAA<br>CGGC                    | FVREPTGRLPASARC                                                       | HLA-B*07:02 | FVREPTGRL  | 9  | 134.7 | 9.34659 | flameshift deletion   |
| Se051 | POLR3C   | NM_001303456.1c.493_518del<br>eIGCAGACACACTTTGT<br>ACAACGCTG               | YAEVSNFVRLPFGTYH                                                      | HLA-C*03:04 | YAEVSNFV   | 9  | 230.1 | 12.326  | flameshift deletion   |
| Se051 | POLR3C   | NM_006468.7c.454_479delG<br>CAGACACACACTTTGTAC<br>AACGCTG                  | YAEVSNFVRLPFGTYH                                                      | HLA-B*40:02 | AEVSNFVRL  | 10 | 30.2  | 12.326  | flameshift deletion   |
| Se051 | POLR3C   | NM_006468.7c.454_479delG<br>CAGACACACACTTTGTAC<br>AACGCTG                  | YAEVSNFVRLPFGTYH                                                      | HLA-A*26:01 | FVRLPFGTY  | 9  | 159.1 | 12.326  | flameshift deletion   |

|       |         |                                                                 |                                                    |             |            |    |       |         |                       |
|-------|---------|-----------------------------------------------------------------|----------------------------------------------------|-------------|------------|----|-------|---------|-----------------------|
| Se051 | PSMB1   | NM_002793.3c.398_422delA<br>TGTTTACAACATCATCGG<br>TGGACT        | TILYSRRFFPYLMKKERGLYALIQ                           | HLA-A*24:02 | LYSRRFFPY  | 9  | 358.2 | 29.872  | flameshift deletion   |
| Se051 | PSMB1   | NM_002793.3c.398_422delA<br>TGTTTACAACATCATCGG<br>TGGACT        | TILYSRRFFPYLMKKERGLYALIQ                           | HLA-B*40:02 | KERGLYAL   | 9  | 16.6  | 29.872  | flameshift deletion   |
| Se051 | PSMB1   | NM_002793.3c.398_422delA<br>TGTTTACAACATCATCGG<br>TGGACT        | TILYSRRFFPYLMKKERGLYALIQ                           | HLA-C*03:04 | YSRRFFPYL  | 9  | 113.2 | 29.872  | flameshift deletion   |
| Se051 | PSMB1   | NM_002793.3c.398_422delA<br>TGTTTACAACATCATCGG<br>TGGACT        | TILYSRRFFPYLMKKERGLYALIQ                           | HLA-C*07:02 | SRRFFPYLM  | 9  | 38.2  | 29.872  | flameshift deletion   |
| Se051 | PSMB1   | NM_002793.3c.398_422delA<br>TGTTTACAACATCATCGG<br>TGGACT        | TILYSRRFFPYLMKKERGLYALIQ                           | HLA-C*07:02 | LYSRRFFPY  | 9  | 186.1 | 29.872  | flameshift deletion   |
| Se051 | PSMB1   | NM_002793.3c.398_422delA<br>TGTTTACAACATCATCGG<br>TGGACT        | TILYSRRFFPYLMKKERGLYALIQ                           | HLA-C*07:02 | YSRRFFPYL  | 9  | 347.4 | 29.872  | flameshift deletion   |
| Se051 | PSMB1   | NM_002793.3c.398_422delA<br>TGTTTACAACATCATCGG<br>TGGACT        | TILYSRRFFPYLMKKERGLYALIQ                           | HLA-A*24:02 | LYSRRFFPYL | 10 | 112.3 | 29.872  | flameshift deletion   |
| Se051 | PSMB1   | NM_002793.3c.398_422delA<br>TGTTTACAACATCATCGG<br>TGGACT        | TILYSRRFFPYLMKKERGLYALIQ                           | HLA-B*40:02 | KKERGLYAL  | 10 | 85.8  | 29.872  | flameshift deletion   |
| Se051 | PSMB1   | NM_002793.3c.398_422delA<br>TGTTTACAACATCATCGG<br>TGGACT        | TILYSRRFFPYLMKKERGLYALIQ                           | HLA-B*40:02 | KERGLYALI  | 10 | 121.9 | 29.872  | flameshift deletion   |
| Se051 | PSMB1   | NM_002793.3c.398_422delA<br>TGTTTACAACATCATCGG<br>TGGACT        | TILYSRRFFPYLMKKERGLYALIQ                           | HLA-C*07:02 | YSRRFFPYLM | 10 | 181.2 | 29.872  | flameshift deletion   |
| Se054 | PLEKHG5 | NM_001265592.1c.2222_224<br>8delACACGTTCCAGGCCA<br>GTGGCCAGGCCT | YLNHFHSAVGALCRGWVDTIYN                             | HLA-A*33:03 | HSAVGALCR  | 9  | 482.5 | 4.77545 | inflammation deletion |
| Se054 | PLEKHG5 | NM_001265592.1c.2222_224<br>8delACACGTTCCAGGCCA<br>GTGGCCAGGCCT | YLNHFHSAVGALCRGWVDTIYN                             | HLA-C*14:02 | YLNHFHSAV  | 9  | 72.7  | 4.77545 | inflammation deletion |
| Se054 | PLEKHG5 | NM_001265592.1c.2222_224<br>8delACACGTTCCAGGCCA<br>GTGGCCAGGCCT | YLNHFHSAVGALCRGWVDTIYN                             | HLA-C*14:02 | EFHSAVGAL  | 9  | 98.7  | 4.77545 | inflammation deletion |
| Se054 | PLEKHG5 | NM_001265592.1c.2222_224<br>8delACACGTTCCAGGCCA<br>GTGGCCAGGCCT | YLNHFHSAVGALCRGWVDTIYN                             | HLA-C*14:03 | YLNHFHSAV  | 9  | 72.7  | 4.77545 | inflammation deletion |
| Se054 | PLEKHG5 | NM_001265592.1c.2222_224<br>8delACACGTTCCAGGCCA<br>GTGGCCAGGCCT | YLNHFHSAVGALCRGWVDTIYN                             | HLA-C*14:03 | EFHSAVGAL  | 9  | 98.7  | 4.77545 | inflammation deletion |
| Se059 | MTOR    | NM_004958.3c.3674_3678del<br>AAGAG                              | CRIVKGYTLADGGSFDPASDA                              | HLA-B*39:02 | CRIVKGYTL  | 9  | 273.9 | 3.98083 | flameshift deletion   |
| Se059 | MTOR    | NM_004958.3c.3674_3678del<br>AAGAG                              | CRIVKGYTLADGGSFDPASDA                              | HLA-C*07:02 | CRIVKGYTL  | 9  | 201.5 | 3.98083 | flameshift deletion   |
| Se059 | MTOR    | NM_004958.3c.3674_3678del<br>AAGAG                              | CRIVKGYTLADGGSFDPASDA                              | HLA-C*03:04 | LADGGSFDP  | 9  | 316   | 3.98083 | flameshift deletion   |
| Se059 | MTOR    | NM_004958.3c.3674_3678del<br>AAGAG                              | CRIVKGYTLADGGSFDPASDA                              | HLA-C*03:04 | YTLADGGSF  | 9  | 24.5  | 3.98083 | flameshift deletion   |
| Se059 | PER2    | NM_022817.2c.1209delG                                           | FDYSPIRFRARTESTSRWTPAGPASSTHGA<br>GKSPSSLGGTKSGWAL | HLA-A*31:01 | YSPIRFRAR  | 9  | 198   | 2.51843 | flameshift deletion   |
| Se059 | PER2    | NM_022817.2c.1209delG                                           | FDYSPIRFRARTESTSRWTPAGPASSTHGA<br>GKSPSSLGGTKSGWAL | HLA-A*31:01 | RARTESTSR  | 9  | 33.9  | 2.51843 | flameshift deletion   |
| Se059 | PER2    | NM_022817.2c.1209delG                                           | FDYSPIRFRARTESTSRWTPAGPASSTHGA<br>GKSPSSLGGTKSGWAL | HLA-A*31:01 | DYSPIRFRAR | 10 | 312.1 | 2.51843 | flameshift deletion   |
| Se067 | KMT2D   | NM_003482.3c.1044delG                                           | NHVAAGSGQERVLVIPPSPVTRPLLLRE                       | HLA-A*02:06 | LVIPPSPVPT | 10 | 184   | 13.7806 | flameshift deletion   |

|       |       |                                                          |                                                                              |             |            |    |       |         |                      |
|-------|-------|----------------------------------------------------------|------------------------------------------------------------------------------|-------------|------------|----|-------|---------|----------------------|
| Se067 | KMT2D | NM_003482.3c.10446delG                                   | NHVAAGSGQERVLVIPPSLVPTRPLLRE                                                 | HLA-A*02:06 | SLVPTRPLL  | 9  | 480.6 | 13.7806 | flameshift deletion  |
| Se067 | KMT2D | NM_003482.3c.10446delG                                   | NHVAAGSGQERVLVIPPSLVPTRPLLRE                                                 | HLA-A*02:06 | RVLVIPPSL  | 9  | 325   | 13.7806 | flameshift deletion  |
| Se067 | KMT2D | NM_003482.3c.10446delG                                   | NHVAAGSGQERVLVIPPSLVPTRPLLRE                                                 | HLA-A*02:06 | RVLVIPPSLV | 10 | 397.1 | 13.7806 | flameshift deletion  |
| Se067 | KMT2D | NM_003482.3c.10446delG                                   | NHVAAGSGQERVLVIPPSLVPTRPLLRE                                                 | HLA-A*02:06 | VIPPSLVPT  | 9  | 389.3 | 13.7806 | flameshift deletion  |
| Se067 | TRAF6 | NM_145803.2c.1509_1510ins                                | LVRCEVSTRFLTWFVAFGGRVFSHEVLMQ<br>GYSLPSLAQKQLPGENSAFPCPVLNNMQT<br>NKPREICNIY | HLA-A*02:06 | MQGYSLPSL  | 9  | 31.1  | 3.94194 | frameshift insertion |
| Se067 | TRAF6 | NM_145803.2c.1509_1510ins                                | LVRCEVSTRFLTWFVAFGGRVFSHEVLMQ<br>GYSLPSLAQKQLPGENSAFPCPVLNNMQT<br>NKPREICNIY | HLA-A*02:06 | LMQGYSLPSL | 10 | 158.2 | 3.94194 | frameshift insertion |
| Se067 | TRAF6 | NM_145803.2c.1509_1510ins                                | LVRCEVSTRFLTWFVAFGGRVFSHEVLMQ<br>GYSLPSLAQKQLPGENSAFPCPVLNNMQT<br>NKPREICNIY | HLA-A*02:06 | VSTRFLTWV  | 9  | 205.5 | 3.94194 | frameshift insertion |
| Se067 | TRAF6 | NM_145803.2c.1509_1510ins                                | LVRCEVSTRFLTWFVAFGGRVFSHEVLMQ<br>GYSLPSLAQKQLPGENSAFPCPVLNNMQT<br>NKPREICNIY | HLA-A*02:06 | MQGYSLPSLA | 10 | 339.9 | 3.94194 | frameshift insertion |
| Se067 | TRAF6 | NM_145803.2c.1509_1510ins                                | LVRCEVSTRFLTWFVAFGGRVFSHEVLMQ<br>GYSLPSLAQKQLPGENSAFPCPVLNNMQT<br>NKPREICNIY | HLA-A*02:06 | RVFSHEVLM  | 9  | 384.1 | 3.94194 | frameshift insertion |
| Se067 | TRAF6 | NM_145803.2c.1509_1510ins                                | LVRCEVSTRFLTWFVAFGGRVFSHEVLMQ<br>GYSLPSLAQKQLPGENSAFPCPVLNNMQT<br>NKPREICNIY | HLA-A*02:06 | LTWVAFGGRV | 10 | 429.5 | 3.94194 | frameshift insertion |
| Se067 | TRAF6 | NM_145803.2c.1509_1510ins                                | LVRCEVSTRFLTWFVAFGGRVFSHEVLMQ<br>GYSLPSLAQKQLPGENSAFPCPVLNNMQT<br>NKPREICNIY | HLA-A*24:02 | TWVAFGGRVF | 10 | 320.4 | 3.94194 | frameshift insertion |
| Se067 | TRAF6 | NM_145803.2c.1509_1510ins                                | LVRCEVSTRFLTWFVAFGGRVFSHEVLMQ<br>GYSLPSLAQKQLPGENSAFPCPVLNNMQT<br>NKPREICNIY | HLA-B*40:06 | GENSAFPCPV | 10 | 96    | 3.94194 | frameshift insertion |
| Se067 | TRAF6 | NM_145803.2c.1509_1510ins                                | LVRCEVSTRFLTWFVAFGGRVFSHEVLMQ<br>GYSLPSLAQKQLPGENSAFPCPVLNNMQT<br>NKPREICNIY | HLA-B*40:06 | CEVSTRFLT  | 9  | 483.7 | 3.94194 | frameshift insertion |
| Se067 | TRAF6 | NM_145803.2c.1509_1510ins                                | LVRCEVSTRFLTWFVAFGGRVFSHEVLMQ<br>GYSLPSLAQKQLPGENSAFPCPVLNNMQT<br>NKPREICNIY | HLA-C*12:02 | WVAFGGRVF  | 9  | 308.8 | 3.94194 | frameshift insertion |
| Se067 | TRAF6 | NM_145803.2c.1509_1510ins                                | LVRCEVSTRFLTWFVAFGGRVFSHEVLMQ<br>GYSLPSLAQKQLPGENSAFPCPVLNNMQT<br>NKPREICNIY | HLA-C*12:02 | RVFSHEVLM  | 9  | 401.2 | 3.94194 | frameshift insertion |
| Se067 | TRAF6 | NM_145803.2c.1509_1510ins                                | LVRCEVSTRFLTWFVAFGGRVFSHEVLMQ<br>GYSLPSLAQKQLPGENSAFPCPVLNNMQT<br>NKPREICNIY | HLA-C*12:02 | FSHEVLMQGY | 10 | 436.5 | 3.94194 | frameshift insertion |
| Se068 | CUX1  | NM_001202543.1c.309_323del<br>eACCAGCTTTGGATCT           | YKRLIDVDPVGGQQLKLVQRL                                                        | HLA-A*31:01 | QQLKLVQRL  | 9  | 259.2 | 2.58061 | inframe deletion     |
| Se068 | ZRSR2 | NM_005089.3c.1032_1055del<br>AGACATCTACTTGCTCC<br>AGATCG | NPNNFEWEANRTGSSFGKNSER                                                       | HLA-A*31:01 | SSFGKNSER  | 9  | 18.5  | 7.80586 | inframe deletion     |
| Se068 | ZRSR2 | NM_005089.3c.1032_1055del<br>AGACATCTACTTGCTCC<br>AGATCG | NPNNFEWEANRTGSSFGKNSER                                                       | HLA-A*31:01 | GSSFGKNSER | 10 | 174.4 | 7.80586 | inframe deletion     |
| Se068 | ZRSR2 | NM_005089.3c.1032_1055del<br>AGACATCTACTTGCTCC<br>AGATCG | NPNNFEWEANRTGSSFGKNSER                                                       | HLA-B*15:01 | WEANRTGSSF | 10 | 84.1  | 7.80586 | inframe deletion     |
| Se071 | TDRD7 | NM_014290.2c.2472_2477del<br>CTTCCC                      | IAHVYLFTPKNDPHRSINRQIT                                                       | HLA-A*31:01 | LFTPKNDPHR | 10 | 474.9 | 3.65031 | inframe deletion     |
| Se102 | LMTK2 | NM_014916.3c.814_836delT<br>TTCTCACTCCGACTTAA<br>ATGT    | FLHSDLALRNCESGRLRNRIQQVQGGLY                                                 | HLA-A*33:03 | FLHSDLALR  | 9  | 154.4 | 2.23482 | flameshift deletion  |
| Se102 | LMTK2 | NM_014916.3c.814_836delT<br>TTCTCACTCCGACTTAA<br>ATGT    | FLHSDLALRNCESGRLRNRIQQVQGGLY                                                 | HLA-B*15:01 | IQQVQGGLY  | 9  | 66.5  | 2.23482 | flameshift deletion  |

|       |       |                                                        |                                                                                                                           |             |             |    |       |         |                     |
|-------|-------|--------------------------------------------------------|---------------------------------------------------------------------------------------------------------------------------|-------------|-------------|----|-------|---------|---------------------|
| Se102 | LMTK2 | NM_014916.3c.814_836delT<br>TTCTCACCTCCGACTTAA<br>ATGT | FLHSDLALRNCESGRLRNRIQVQGGLY                                                                                               | HLA-B*15:01 | RIQVQGGLY   | 10 | 86.4  | 2.23482 | flameshift deletion |
| Se102 | SMO   | NM_005631.4c.663_675delC<br>TTCACAGAGGCT               | EGCGIQCQNPLSTRCTATS<br>RSPWPHSWLTGGTRIALTL<br>LFSSTSMRASLWAALAGW<br>PSSWMVPAERSSAVQMAP                                    | HLA-C*14:03 | MRASLWAAAL  | 9  | 28.9  | 4.95255 | flameshift deletion |
| Se102 | SMO   | NM_005631.4c.663_675delC<br>TTCACAGAGGCT               | EGCGIQCQNPLSTRCTATS<br>RSPWPHSWLTGGTRIALTL<br>LFSSTSMRASLWAALAGW<br>PSSWMVPAERSSAVQMAP                                    | HLA-A*33:03 | PSSWMVPAER  | 10 | 481.4 | 4.95255 | flameshift deletion |
| Se102 | SMO   | NM_005631.4c.663_675delC<br>TTCACAGAGGCT               | EGCGIQCQNPLSTRCTATS<br>RSPWPHSWLTGGTRIALTL<br>LFSSTSMRASLWAALAGW<br>PSSWMVPAERSSAVQMAP                                    | HLA-B*15:01 | SMRASLWAAAL | 10 | 53.4  | 4.95255 | flameshift deletion |
| Se102 | SMO   | NM_005631.4c.663_675delC<br>TTCACAGAGGCT               | EGCGIQCQNPLSTRCTATS<br>RSPWPHSWLTGGTRIALTL<br>LFSSTSMRASLWAALAGW<br>PSSWMVPAERSSAVQMAP                                    | HLA-B*15:01 | GTRIALTL    | 10 | 180.7 | 4.95255 | flameshift deletion |
| Se102 | SMO   | NM_005631.4c.663_675delC<br>TTCACAGAGGCT               | EGCGIQCQNPLSTRCTATS<br>RSPWPHSWLTGGTRIALTL<br>LFSSTSMRASLWAALAGW<br>PSSWMVPAERSSAVQMAP                                    | HLA-B*15:01 | TLFSSTSM    | 10 | 229.9 | 4.95255 | flameshift deletion |
| Se102 | SMO   | NM_005631.4c.663_675delC<br>TTCACAGAGGCT               | EGCGIQCQNPLSTRCTATS<br>RSPWPHSWLTGGTRIALTL<br>LFSSTSMRASLWAALAGW<br>PSSWMVPAERSSAVQMAP                                    | HLA-A*33:03 | LLFSSTSMR   | 10 | 280   | 4.95255 | flameshift deletion |
| Se102 | SMO   | NM_005631.4c.663_675delC<br>TTCACAGAGGCT               | EGCGIQCQNPLSTRCTATS<br>RSPWPHSWLTGGTRIALTL<br>LFSSTSMRASLWAALAGW<br>PSSWMVPAERSSAVQMAP                                    | HLA-A*33:03 | STRCTATS    | 10 | 107.1 | 4.95255 | flameshift deletion |
| Se102 | SMO   | NM_005631.4c.663_675delC<br>TTCACAGAGGCT               | EGCGIQCQNPLSTRCTATS<br>RSPWPHSWLTGGTRIALTL<br>LFSSTSMRASLWAALAGW<br>PSSWMVPAERSSAVQMAP                                    | HLA-A*11:01 | ATSRPSGPR   | 10 | 167.6 | 4.95255 | flameshift deletion |
| Se102 | SMO   | NM_005631.4c.663_675delC<br>TTCACAGAGGCT               | EGCGIQCQNPLSTRCTATS<br>RSPWPHSWLTGGTRIALTL<br>LFSSTSMRASLWAALAGW<br>PSSWMVPAERSSAVQMAP                                    | HLA-C*14:03 | SSPWHSWL    | 9  | 429.6 | 4.95255 | flameshift deletion |
| Se102 | SMO   | NM_005631.4c.663_675delC<br>TTCACAGAGGCT               | EGCGIQCQNPLSTRCTATS<br>RSPWPHSWLTGGTRIALTL<br>LFSSTSMRASLWAALAGW<br>PSSWMVPAERSSAVQMAP                                    | HLA-C*14:03 | LLFSSTSM    | 9  | 294.8 | 4.95255 | flameshift deletion |
| Se102 | SMO   | NM_005631.4c.663_675delC<br>TTCACAGAGGCT               | EGCGIQCQNPLSTRCTATS<br>RSPWPHSWLTGGTRIALTL<br>LFSSTSMRASLWAALAGW<br>PSSWMVPAERSSAVQMAP                                    | HLA-C*14:03 | TRIALTL     | 9  | 183.5 | 4.95255 | flameshift deletion |
| Se102 | SMO   | NM_005631.4c.663_675delC<br>TTCACAGAGGCT               | EGCGIQCQNPLSTRCTATS<br>RSPWPHSWLTGGTRIALTL<br>LFSSTSMRASLWAALAGW<br>PSSWMVPAERSSAVQMAP                                    | HLA-A*33:03 | TSRPSGPR    | 9  | 246.4 | 4.95255 | flameshift deletion |
| Se102 | SMO   | NM_005631.4c.663_675delC<br>TTCACAGAGGCT               | EGCGIQCQNPLSTRCTATS<br>RSPWPHSWLTGGTRIALTL<br>LFSSTSMRASLWAALAGW<br>PSSWMVPAERSSAVQMAP                                    | HLA-A*11:01 | SSWMVPAER   | 9  | 135.9 | 4.95255 | flameshift deletion |
| Se102 | SMO   | NM_005631.4c.663_675delC<br>TTCACAGAGGCT               | EGCGIQCQNPLSTRCTATS<br>RSPWPHSWLTGGTRIALTL<br>LFSSTSMRASLWAALAGW<br>PSSWMVPAERSSAVQMAP                                    | HLA-A*11:01 | LLFSSTSMR   | 9  | 176.4 | 4.95255 | flameshift deletion |
| Se102 | SMO   | NM_005631.4c.663_675delC<br>TTCACAGAGGCT               | EGCGIQCQNPLSTRCTATS<br>RSPWPHSWLTGGTRIALTL<br>LFSSTSMRASLWAALAGW<br>PSSWMVPAERSSAVQMAP                                    | HLA-A*33:03 | SSWMVPAER   | 9  | 28.8  | 4.95255 | flameshift deletion |
| Se102 | SMO   | NM_005631.4c.663_675delC<br>TTCACAGAGGCT               | EGCGIQCQNPLSTRCTATS<br>RSPWPHSWLTGGTRIALTL<br>LFSSTSMRASLWAALAGW<br>PSSWMVPAERSSAVQMAP                                    | HLA-C*14:03 | SWLTGGTRI   | 9  | 241.7 | 4.95255 | flameshift deletion |
| Se102 | SMO   | NM_005631.4c.663_675delC<br>TTCACAGAGGCT               | EGCGIQCQNPLSTRCTATS<br>RSPWPHSWLTGGTRIALTL<br>LFSSTSMRASLWAALAGW<br>PSSWMVPAERSSAVQMAP                                    | HLA-A*33:03 | LLFSSTSMR   | 9  | 59.9  | 4.95255 | flameshift deletion |
| Se102 | SMO   | NM_005631.4c.663_675delC<br>TTCACAGAGGCT               | EGCGIQCQNPLSTRCTATS<br>RSPWPHSWLTGGTRIALTL<br>LFSSTSMRASLWAALAGW<br>PSSWMVPAERSSAVQMAP                                    | HLA-B*44:03 | AERSSAVQM   | 9  | 417   | 4.95255 | flameshift deletion |
| Se102 | SMO   | NM_005631.4c.663_675delC<br>TTCACAGAGGCT               | EGCGIQCQNPLSTRCTATS<br>RSPWPHSWLTGGTRIALTL<br>LFSSTSMRASLWAALAGW<br>PSSWMVPAERSSAVQMAP                                    | HLA-B*15:01 | LLFSSTSM    | 9  | 30.4  | 4.95255 | flameshift deletion |
| Se102 | SMO   | NM_005631.4c.663_675delC<br>TTCACAGAGGCT               | EGCGIQCQNPLSTRCTATS<br>RSPWPHSWLTGGTRIALTL<br>LFSSTSMRASLWAALAGW<br>PSSWMVPAERSSAVQMAP                                    | HLA-B*15:01 | SMRASLWAA   | 9  | 238.4 | 4.95255 | flameshift deletion |
| Se102 | SMO   | NM_005631.4c.663_675delC<br>TTCACAGAGGCT               | EGCGIQCQNPLSTRCTATS<br>RSPWPHSWLTGGTRIALTL<br>LFSSTSMRASLWAALAGW<br>PSSWMVPAERSSAVQMAP                                    | HLA-A*33:03 | HSWLTGGTR   | 9  | 42.3  | 4.95255 | flameshift deletion |
| Se104 | ARMC7 | NM_024585.3c.386_408delG<br>CCGACGCTTCTCCAGAG<br>GCTG  | AITLMLHSPDRHARGAVH<br>ASLLPLGQRQAPEGTDL<br>PGLLLPPGGRRQPAGAL<br>CPGYPTAERGPTAALHGD<br>CETVAPLLLETVLMWTQ<br>GTGSTYCPGAFSAI | HLA-B*07:02 | APLLETTVL   | 10 | 67.5  | 6.17157 | flameshift deletion |



|       |       |                                                        |                                                                                                                        |             |            |    |       |         |                     |
|-------|-------|--------------------------------------------------------|------------------------------------------------------------------------------------------------------------------------|-------------|------------|----|-------|---------|---------------------|
| Se104 | ARMC7 | NM_024585.3c.386_408delG<br>CCGCAGCTTTCTCCAGAG<br>GCTG | AITTLMHLSPPDRHARGAVHASLLPLGQR<br>QAPEPGTDLPGGLLLPPGGRRGPAGALC<br>PGYPTAERGPTAALHGDCEVAPLLETT<br>TVLMWTQGTGSTYCPIGAFSAI | HLA-B*07:02 | PPDRHARGAV | 10 | 283.7 | 6.17157 | flameshift deletion |
| Se104 | ARMC7 | NM_024585.3c.386_408delG<br>CCGCAGCTTTCTCCAGAG<br>GCTG | AITTLMHLSPPDRHARGAVHASLLPLGQR<br>QAPEPGTDLPGGLLLPPGGRRGPAGALC<br>PGYPTAERGPTAALHGDCEVAPLLETT<br>TVLMWTQGTGSTYCPIGAFSAI | HLA-B*07:02 | CPIGAFSAI  | 9  | 16.8  | 6.17157 | flameshift deletion |
| Se104 | ARMC7 | NM_024585.3c.386_408delG<br>CCGCAGCTTTCTCCAGAG<br>GCTG | AITTLMHLSPPDRHARGAVHASLLPLGQR<br>QAPEPGTDLPGGLLLPPGGRRGPAGALC<br>PGYPTAERGPTAALHGDCEVAPLLETT<br>TVLMWTQGTGSTYCPIGAFSAI | HLA-B*07:02 | AVHASLLPL  | 9  | 264.4 | 6.17157 | flameshift deletion |
| Se104 | ARMC7 | NM_024585.3c.386_408delG<br>CCGCAGCTTTCTCCAGAG<br>GCTG | AITTLMHLSPPDRHARGAVHASLLPLGQR<br>QAPEPGTDLPGGLLLPPGGRRGPAGALC<br>PGYPTAERGPTAALHGDCEVAPLLETT<br>TVLMWTQGTGSTYCPIGAFSAI | HLA-B*07:02 | APLLETTV   | 9  | 325   | 6.17157 | flameshift deletion |
| Se104 | ARMC7 | NM_024585.3c.386_408delG<br>CCGCAGCTTTCTCCAGAG<br>GCTG | AITTLMHLSPPDRHARGAVHASLLPLGQR<br>QAPEPGTDLPGGLLLPPGGRRGPAGALC<br>PGYPTAERGPTAALHGDCEVAPLLETT<br>TVLMWTQGTGSTYCPIGAFSAI | HLA-C*12:02 | STYCPIGAF  | 9  | 131.6 | 6.17157 | flameshift deletion |
| Se104 | ARMC7 | NM_024585.3c.386_408delG<br>CCGCAGCTTTCTCCAGAG<br>GCTG | AITTLMHLSPPDRHARGAVHASLLPLGQR<br>QAPEPGTDLPGGLLLPPGGRRGPAGALC<br>PGYPTAERGPTAALHGDCEVAPLLETT<br>TVLMWTQGTGSTYCPIGAFSAI | HLA-C*12:02 | WTQGTGSTY  | 9  | 321.6 | 6.17157 | flameshift deletion |
| Se104 | ARMC7 | NM_024585.3c.386_408delG<br>CCGCAGCTTTCTCCAGAG<br>GCTG | AITTLMHLSPPDRHARGAVHASLLPLGQR<br>QAPEPGTDLPGGLLLPPGGRRGPAGALC<br>PGYPTAERGPTAALHGDCEVAPLLETT<br>TVLMWTQGTGSTYCPIGAFSAI | HLA-B*07:02 | YCPIGAFSAI | 10 | 40.6  | 6.17157 | flameshift deletion |
| Se104 | ARMC7 | NM_024585.3c.386_408delG<br>CCGCAGCTTTCTCCAGAG<br>GCTG | AITTLMHLSPPDRHARGAVHASLLPLGQR<br>QAPEPGTDLPGGLLLPPGGRRGPAGALC<br>PGYPTAERGPTAALHGDCEVAPLLETT<br>TVLMWTQGTGSTYCPIGAFSAI | HLA-B*07:02 | RGPQPAGALC | 10 | 310.3 | 6.17157 | flameshift deletion |
| Se104 | ARMC7 | NM_024585.3c.386_408delG<br>CCGCAGCTTTCTCCAGAG<br>GCTG | AITTLMHLSPPDRHARGAVHASLLPLGQR<br>QAPEPGTDLPGGLLLPPGGRRGPAGALC<br>PGYPTAERGPTAALHGDCEVAPLLETT<br>TVLMWTQGTGSTYCPIGAFSAI | HLA-B*07:02 | HARGAVHASL | 10 | 56.7  | 6.17157 | flameshift deletion |
| Se104 | BRD7  | NM_001173984.2c.830_831d<br>eLAG                       | GEDGGCWQRERGLWRCRSTRLOESQQRK                                                                                           | HLA-A*24:02 | CWQRERGLW  | 9  | 452.1 | 30.7135 | flameshift deletion |
| Se105 | DERL1 | NM_024295.5c.78delC                                    | RYWFAATVAVPWSANSASSARPTSSSGPK<br>PSFIAFRFGGQSLPPFISLWVQELDFFIWSIY<br>ISYISILRDLKQELLMGGQQTYS CSSLTGF<br>AS             | HLA-C*14:02 | FGGQSLPPF  | 9  | 313.8 | 9.57852 | flameshift deletion |
| Se105 | DERL1 | NM_001134671.2c.78delC                                 | RYWFAATVAVPWSANSASSARPTSSSGPK<br>PSFIAFRFGGQSLPPFISLWVQELDFFIWSIY<br>ISYISILRDLKQELLMGGQQTYS CSSLTGF<br>AS             | HLA-C*14:02 | IYSCSSLTGF | 10 | 175   | 9.57852 | flameshift deletion |
| Se105 | DERL1 | NM_001134671.2c.78delC                                 | RYWFAATVAVPWSANSASSARPTSSSGPK<br>PSFIAFRFGGQSLPPFISLWVQELDFFIWSIY<br>ISYISILRDLKQELLMGGQQTYS CSSLTGF<br>AS             | HLA-A*24:02 | IYISYISIL  | 9  | 33.5  | 9.57852 | flameshift deletion |
| Se105 | DERL1 | NM_024295.5c.78delC                                    | RYWFAATVAVPWSANSASSARPTSSSGPK<br>PSFIAFRFGGQSLPPFISLWVQELDFFIWSIY<br>ISYISILRDLKQELLMGGQQTYS CSSLTGF<br>AS             | HLA-A*24:02 | RFGGQSLPPF | 10 | 143.8 | 9.57852 | flameshift deletion |
| Se105 | DERL1 | NM_024295.5c.78delC                                    | RYWFAATVAVPWSANSASSARPTSSSGPK<br>PSFIAFRFGGQSLPPFISLWVQELDFFIWSIY<br>ISYISILRDLKQELLMGGQQTYS CSSLTGF<br>AS             | HLA-A*24:02 | RYWFAATVAV | 10 | 168.9 | 9.57852 | flameshift deletion |
| Se105 | DERL1 | NM_024295.5c.78delC                                    | RYWFAATVAVPWSANSASSARPTSSSGPK<br>PSFIAFRFGGQSLPPFISLWVQELDFFIWSIY<br>ISYISILRDLKQELLMGGQQTYS CSSLTGF<br>AS             | HLA-A*24:02 | IYSCSSLTGF | 10 | 21.3  | 9.57852 | flameshift deletion |
| Se105 | DERL1 | NM_024295.5c.78delC                                    | RYWFAATVAVPWSANSASSARPTSSSGPK<br>PSFIAFRFGGQSLPPFISLWVQELDFFIWSIY<br>ISYISILRDLKQELLMGGQQTYS CSSLTGF<br>AS             | HLA-A*24:02 | WFAATVAVPW | 10 | 312.2 | 9.57852 | flameshift deletion |
| Se105 | DERL1 | NM_024295.5c.78delC                                    | RYWFAATVAVPWSANSASSARPTSSSGPK<br>PSFIAFRFGGQSLPPFISLWVQELDFFIWSIY<br>ISYISILRDLKQELLMGGQQTYS CSSLTGF<br>AS             | HLA-C*14:02 | FISLWVQEL  | 9  | 202.4 | 9.57852 | flameshift deletion |
| Se105 | DERL1 | NM_024295.5c.78delC                                    | RYWFAATVAVPWSANSASSARPTSSSGPK<br>PSFIAFRFGGQSLPPFISLWVQELDFFIWSIY<br>ISYISILRDLKQELLMGGQQTYS CSSLTGF<br>AS             | HLA-C*14:02 | RYWFAATVA  | 9  | 73.8  | 9.57852 | flameshift deletion |
| Se105 | DERL1 | NM_024295.5c.78delC                                    | RYWFAATVAVPWSANSASSARPTSSSGPK<br>PSFIAFRFGGQSLPPFISLWVQELDFFIWSIY<br>ISYISILRDLKQELLMGGQQTYS CSSLTGF<br>AS             | HLA-C*14:02 | YWFAATVAV  | 9  | 12.6  | 9.57852 | flameshift deletion |
| Se105 | DERL1 | NM_001134671.2c.78delC                                 | RYWFAATVAVPWSANSASSARPTSSSGPK<br>PSFIAFRFGGQSLPPFISLWVQELDFFIWSIY<br>ISYISILRDLKQELLMGGQQTYS CSSLTGF<br>AS             | HLA-C*14:02 | AFRFGGQSL  | 9  | 43.2  | 9.57852 | flameshift deletion |
| Se105 | DERL1 | NM_001134671.2c.78delC                                 | RYWFAATVAVPWSANSASSARPTSSSGPK<br>PSFIAFRFGGQSLPPFISLWVQELDFFIWSIY<br>ISYISILRDLKQELLMGGQQTYS CSSLTGF<br>AS             | HLA-C*14:02 | SIYISYISIL | 10 | 124.1 | 9.57852 | flameshift deletion |
| Se105 | DERL1 | NM_024295.5c.78delC                                    | RYWFAATVAVPWSANSASSARPTSSSGPK<br>PSFIAFRFGGQSLPPFISLWVQELDFFIWSIY<br>ISYISILRDLKQELLMGGQQTYS CSSLTGF<br>AS             | HLA-A*24:02 | SIYISYISIL | 10 | 118.3 | 9.57852 | flameshift deletion |

|       |         |                                        |                                                                                                            |             |            |    |       |         |                      |
|-------|---------|----------------------------------------|------------------------------------------------------------------------------------------------------------|-------------|------------|----|-------|---------|----------------------|
| Se105 | DERL1   | NM_001134671.2c.78delC                 | RYWFAATVAVPWSANSASSARPTSSSGPK<br>PSFIARFRGGQSLPPFISLWVQELDFFIWSIY<br>ISYISILRDLKQELLMGGQQTYYSCSSLTGF<br>AS | HLA-A*24:02 | SYISILRDL  | 9  | 90.2  | 9.57852 | flameshift deletion  |
| Se105 | DERL1   | NM_001134671.2c.78delC                 | RYWFAATVAVPWSANSASSARPTSSSGPK<br>PSFIARFRGGQSLPPFISLWVQELDFFIWSIY<br>ISYISILRDLKQELLMGGQQTYYSCSSLTGF<br>AS | HLA-C*12:02 | FISLWVQEL  | 9  | 156.8 | 9.57852 | flameshift deletion  |
| Se105 | DERL1   | NM_001134671.2c.78delC                 | RYWFAATVAVPWSANSASSARPTSSSGPK<br>PSFIARFRGGQSLPPFISLWVQELDFFIWSIY<br>ISYISILRDLKQELLMGGQQTYYSCSSLTGF<br>AS | HLA-C*14:02 | RYWFAATVAV | 10 | 98.7  | 9.57852 | flameshift deletion  |
| Se105 | DERL1   | NM_001134671.2c.78delC                 | RYWFAATVAVPWSANSASSARPTSSSGPK<br>PSFIARFRGGQSLPPFISLWVQELDFFIWSIY<br>ISYISILRDLKQELLMGGQQTYYSCSSLTGF<br>AS | HLA-A*24:02 | SLPPFISLW  | 9  | 149.1 | 9.57852 | flameshift deletion  |
| Se105 | DERL1   | NM_001134671.2c.78delC                 | RYWFAATVAVPWSANSASSARPTSSSGPK<br>PSFIARFRGGQSLPPFISLWVQELDFFIWSIY<br>ISYISILRDLKQELLMGGQQTYYSCSSLTGF<br>AS | HLA-A*24:02 | IWSIYISYI  | 9  | 168.8 | 9.57852 | flameshift deletion  |
| Se105 | DERL1   | NM_001134671.2c.78delC                 | RYWFAATVAVPWSANSASSARPTSSSGPK<br>PSFIARFRGGQSLPPFISLWVQELDFFIWSIY<br>ISYISILRDLKQELLMGGQQTYYSCSSLTGF<br>AS | HLA-A*24:02 | LWVQELDF   | 9  | 234.8 | 9.57852 | flameshift deletion  |
| Se105 | DERL1   | NM_024295.5c.78delC                    | RYWFAATVAVPWSANSASSARPTSSSGPK<br>PSFIARFRGGQSLPPFISLWVQELDFFIWSIY<br>ISYISILRDLKQELLMGGQQTYYSCSSLTGF<br>AS | HLA-B*40:06 | QELDFFIWSI | 10 | 76.8  | 9.57852 | flameshift deletion  |
| Se105 | DERL1   | NM_001134671.2c.78delC                 | RYWFAATVAVPWSANSASSARPTSSSGPK<br>PSFIARFRGGQSLPPFISLWVQELDFFIWSIY<br>ISYISILRDLKQELLMGGQQTYYSCSSLTGF<br>AS | HLA-C*12:02 | YSCSSLTGF  | 9  | 473.7 | 9.57852 | flameshift deletion  |
| Se105 | DERL1   | NM_024295.5c.78delC                    | RYWFAATVAVPWSANSASSARPTSSSGPK<br>PSFIARFRGGQSLPPFISLWVQELDFFIWSIY<br>ISYISILRDLKQELLMGGQQTYYSCSSLTGF<br>AS | HLA-C*14:02 | IYISYISIL  | 9  | 9.9   | 9.57852 | flameshift deletion  |
| Se105 | DERL1   | NM_024295.5c.78delC                    | RYWFAATVAVPWSANSASSARPTSSSGPK<br>PSFIARFRGGQSLPPFISLWVQELDFFIWSIY<br>ISYISILRDLKQELLMGGQQTYYSCSSLTGF<br>AS | HLA-C*14:02 | SYISILRDL  | 9  | 9.8   | 9.57852 | flameshift deletion  |
| Se105 | DERL1   | NM_001134671.2c.78delC                 | RYWFAATVAVPWSANSASSARPTSSSGPK<br>PSFIARFRGGQSLPPFISLWVQELDFFIWSIY<br>ISYISILRDLKQELLMGGQQTYYSCSSLTGF<br>AS | HLA-C*12:02 | FAATVAVPW  | 9  | 167.7 | 9.57852 | flameshift deletion  |
| Se105 | ZBTB7B  | NM_001256455.1c.419_420ins             | PCVIAACMEISAGQWARSSQPGRG                                                                                   | HLA-B*40:06 | MEISAGQWA  | 9  | 366.7 | 14.4855 | frameshift insertion |
| Se108 | KNTC1   | NM_014708.4c.5465_5466delAA            | NLEKVVWDMLEAMAMPFNKTW                                                                                      | HLA-A*11:01 | LLEMAMPFNK | 10 | 26.5  | 3.40901 | flameshift deletion  |
| Se108 | KNTC1   | NM_014708.4c.5465_5466delAA            | NLEKVVWDMLEAMAMPFNKTW                                                                                      | HLA-A*02:01 | KVWDMLEMA  | 10 | 137.9 | 3.40901 | flameshift deletion  |
| Se108 | KNTC1   | NM_014708.4c.5465_5466delAA            | NLEKVVWDMLEAMAMPFNKTW                                                                                      | HLA-C*15:02 | KVWDMLEMA  | 9  | 237.6 | 3.40901 | flameshift deletion  |
| Se108 | KNTC1   | NM_014708.4c.5465_5466delAA            | NLEKVVWDMLEAMAMPFNKTW                                                                                      | HLA-B*40:01 | LEKVVWDMLL | 9  | 333.4 | 3.40901 | flameshift deletion  |
| Se108 | KNTC1   | NM_014708.4c.5465_5466delAA            | NLEKVVWDMLEAMAMPFNKTW                                                                                      | HLA-A*02:01 | KVWDMLEMA  | 9  | 54.6  | 3.40901 | flameshift deletion  |
| Se108 | KNTC1   | NM_014708.4c.5465_5466delAA            | NLEKVVWDMLEAMAMPFNKTW                                                                                      | HLA-A*02:01 | MLEAMAMPF  | 9  | 46.7  | 3.40901 | flameshift deletion  |
| Se108 | SLC30A6 | NM_001193513.1c.753_764delTCTTTGTATTAC | FVLIDLAFAYMLIEINNYFA                                                                                       | HLA-A*02:01 | MLIEINNYF  | 9  | 50.6  | 10.5397 | inframe deletion     |
| Se108 | SLC30A6 | NM_001193513.1c.753_764delTCTTTGTATTAC | FVLIDLAFAYMLIEINNYFA                                                                                       | HLA-A*02:01 | FVLIDLAGA  | 9  | 83.2  | 10.5397 | inframe deletion     |
| Se108 | SLC30A6 | NM_001193513.1c.753_764delTCTTTGTATTAC | FVLIDLAFAYMLIEINNYFA                                                                                       | HLA-A*02:01 | MLIEINNYFA | 10 | 13    | 10.5397 | inframe deletion     |
| Se108 | SLC30A6 | NM_001193513.1c.753_764delTCTTTGTATTAC | FVLIDLAFAYMLIEINNYFA                                                                                       | HLA-A*02:01 | VLIDLAFAGA | 10 | 74.1  | 10.5397 | inframe deletion     |
| Se108 | SLC30A6 | NM_001193513.1c.753_764delTCTTTGTATTAC | FVLIDLAFAYMLIEINNYFA                                                                                       | HLA-A*02:01 | IDLAFAYM   | 10 | 93.4  | 10.5397 | inframe deletion     |

|       |         |                                                 |                                                       |             |            |    |       |         |                     |
|-------|---------|-------------------------------------------------|-------------------------------------------------------|-------------|------------|----|-------|---------|---------------------|
| Se108 | SLC30A6 | NM_001193513.1c.753_764delTCTCTTTGTATTAC        | FVLIDLAFAYMLIEINNYFA                                  | HLA-A*02:01 | YMLIEINNYF | 10 | 156.6 | 10.5397 | inframe deletion    |
| Se108 | RRP9    | NM_004704.4c.1279_1293delCTCAAGTCTCCAGC         | CDIPLVGFINSSGDFLVAGVGQ                                | HLA-A*02:01 | FINSSGDFL  | 9  | 263   | 13.3939 | inframe deletion    |
| Se108 | RRP9    | NM_004704.4c.1279_1293delCTCAAGTCTCCAGC         | CDIPLVGFINSSGDFLVAGVGQ                                | HLA-A*02:01 | FINSSGDFLV | 10 | 35.9  | 13.3939 | inframe deletion    |
| Se108 | HOOK3   | NM_032410.3c.591_599delAAGATGCCA                | NEALSAKEEIAHELDQMVAALQ                                | HLA-C*15:02 | IAHELDMQV  | 9  | 387.8 | 3.21499 | inframe deletion    |
| Se108 | HOOK3   | NM_032410.3c.591_599delAAGATGCCA                | NEALSAKEEIAHELDQMVAALQ                                | HLA-B*40:01 | HELDQMVAAL | 10 | 32.5  | 3.21499 | inframe deletion    |
| Se110 | RASA1   | NM_002890.2c.943_965delGATGGATGGATGTGGGTTCACAAA | GDMFIVHNELEFKNR                                       | HLA-C*12:02 | FIVHNELEF  | 9  | 244.3 | 3.03187 | flameshift deletion |
| Se110 | RASA1   | NM_022650.2c.412_434delGATGGATGGATGTGGGTTCACAAA | GDMFIVHNELEFKNR                                       | HLA-A*24:02 | MFIVHNELEF | 10 | 137.9 | 3.03187 | flameshift deletion |
| Se111 | TP53    | NM_001276698.1c.191delC                         | FRHSVVVPYEPLRLALTVPPSTTTTCVTVPAWAA                    | HLA-B*40:06 | YEPLRLALTV | 10 | 100.5 | 5.01064 | flameshift deletion |
| Se111 | TP53    | NM_001276761.1c.551delC                         | FRHSVVVPYEPLRLALTVPPSTTTTCVTVPAWAA                    | HLA-C*07:02 | FRHSVVVPY  | 9  | 51.8  | 5.01064 | flameshift deletion |
| Se111 | ATXN3   | NM_001164774.1c.199_201delAAA                   | EDYRTFLQAAAAATAAAAAAAG                                | HLA-A*02:01 | FLQAAAAAT  | 9  | 299.1 | 5.2384  | inframe deletion    |
| Se111 | ATXN3   | NM_001164774.1c.199_201delAAA                   | EDYRTFLQAAAAATAAAAAAAG                                | HLA-A*02:01 | FLQAAAAATA | 10 | 326.9 | 5.2384  | inframe deletion    |
| Se111 | ATXN3   | NM_001164776.1c.244_246delAAA                   | DSGFFSIQAAAAATAAAAAAAG                                | HLA-A*26:02 | FSIQTAAAA  | 9  | 415.6 | 5.2384  | inframe deletion    |
| Se111 | ATXN3   | NM_001164776.1c.244_246delAAA                   | DSGFFSIQAAAAATAAAAAAAG                                | HLA-C*08:01 | FSIQTAAAA  | 9  | 354.4 | 5.2384  | inframe deletion    |
| Se112 | EPHA1   | NM_005232.4c.102_112delCAAGGCACAGG              | ARAKEVTLMDTRRAGLAAGSPKRWVE                            | HLA-A*33:03 | EVTLMDTRR  | 9  | 170.9 | 4.13806 | flameshift deletion |
| Se112 | EPHA1   | NM_005232.4c.102_112delCAAGGCACAGG              | ARAKEVTLMDTRRAGLAAGSPKRWVE                            | HLA-A*11:01 | AGLAAGSPK  | 9  | 179.6 | 4.13806 | flameshift deletion |
| Se112 | EPHA1   | NM_005232.4c.102_112delCAAGGCACAGG              | ARAKEVTLMDTRRAGLAAGSPKRWVE                            | HLA-A*11:01 | RAGLAAGSPK | 10 | 135.2 | 4.13806 | flameshift deletion |
| Se112 | GALT    | NM_000155.3c.930_939delGGCAACTGG                | WHGAPTGEAGTIGSCTLITTLRSCALPLSGNSWLATKCLLRLRGTSPSRLQRD | HLA-C*14:03 | TLRSCALPL  | 9  | 193   | 8.33716 | flameshift deletion |
| Se112 | GALT    | NM_001258332.1c.603_612delGGCAACTGG             | WHGAPTGEAGTIGSCTLITTLRSCALPLSGNSWLATKCLLRLRGTSPSRLQRD | HLA-A*33:03 | SWLATKCLLR | 10 | 382   | 8.33716 | flameshift deletion |
| Se112 | GALT    | NM_000155.3c.930_939delGGCAACTGG                | WHGAPTGEAGTIGSCTLITTLRSCALPLSGNSWLATKCLLRLRGTSPSRLQRD | HLA-A*33:03 | ATKCLLRLR  | 9  | 74.6  | 8.33716 | flameshift deletion |
| Se112 | GALT    | NM_000155.3c.930_939delGGCAACTGG                | WHGAPTGEAGTIGSCTLITTLRSCALPLSGNSWLATKCLLRLRGTSPSRLQRD | HLA-A*33:03 | SCTLITTLR  | 9  | 489.5 | 8.33716 | flameshift deletion |
| Se112 | GALT    | NM_000155.3c.930_939delGGCAACTGG                | WHGAPTGEAGTIGSCTLITTLRSCALPLSGNSWLATKCLLRLRGTSPSRLQRD | HLA-B*35:01 | LPLSGNSWL  | 9  | 138.6 | 8.33716 | flameshift deletion |
| Se112 | GALT    | NM_001258332.1c.603_612delGGCAACTGG             | WHGAPTGEAGTIGSCTLITTLRSCALPLSGNSWLATKCLLRLRGTSPSRLQRD | HLA-A*33:03 | LATKCLLRLR | 10 | 192.7 | 8.33716 | flameshift deletion |
| Se112 | GALT    | NM_000155.3c.930_939delGGCAACTGG                | WHGAPTGEAGTIGSCTLITTLRSCALPLSGNSWLATKCLLRLRGTSPSRLQRD | HLA-C*14:03 | LRLRGTSP   | 9  | 113.8 | 8.33716 | flameshift deletion |

|       |       |                                         |                                                                      |             |            |    |       |         |                     |
|-------|-------|-----------------------------------------|----------------------------------------------------------------------|-------------|------------|----|-------|---------|---------------------|
| Se112 | GALT  | NM_000155.3c.930_939delG<br>GCCAACTGG   | WHGAPTGSEAGTIGSCTLITTLRSCALPLS<br>GNSWLATKCLLRRLRGTSPLSRLQRD         | HLA-A*11:01 | SGNSWLATK  | 9  | 65.7  | 8.33716 | flameshift deletion |
| Se112 | GALT  | NM_000155.3c.930_939delG<br>GCCAACTGG   | WHGAPTGSEAGTIGSCTLITTLRSCALPLS<br>GNSWLATKCLLRRLRGTSPLSRLQRD         | HLA-A*11:01 | LSGNSWLATK | 10 | 107.2 | 8.33716 | flameshift deletion |
| Se112 | GALT  | NM_000155.3c.930_939delG<br>GCCAACTGG   | WHGAPTGSEAGTIGSCTLITTLRSCALPLS<br>GNSWLATKCLLRRLRGTSPLSRLQRD         | HLA-A*11:01 | GTPLSRLQR  | 10 | 160.3 | 8.33716 | flameshift deletion |
| Se112 | GALT  | NM_000155.3c.930_939delG<br>GCCAACTGG   | WHGAPTGSEAGTIGSCTLITTLRSCALPLS<br>GNSWLATKCLLRRLRGTSPLSRLQRD         | HLA-A*11:01 | GSCTLITTLR | 10 | 308.9 | 8.33716 | flameshift deletion |
| Se112 | GALT  | NM_000155.3c.930_939delG<br>GCCAACTGG   | WHGAPTGSEAGTIGSCTLITTLRSCALPLS<br>GNSWLATKCLLRRLRGTSPLSRLQRD         | HLA-C*14:03 | SWLATKCLL  | 9  | 105.2 | 8.33716 | flameshift deletion |
| Se112 | GALT  | NM_000155.3c.930_939delG<br>GCCAACTGG   | WHGAPTGSEAGTIGSCTLITTLRSCALPLS<br>GNSWLATKCLLRRLRGTSPLSRLQRD         | HLA-A*33:03 | WLATKCLLR  | 9  | 221.2 | 8.33716 | flameshift deletion |
| Se112 | IGF2R | NM_000876.3c.2150_2159del<br>ATGAAAGACA | QLNYRGGTPYNTHRELSSPFSVIETREWA<br>SLNIRKRITPPTTSGGTPAMPARRSPWNA       | HLA-A*33:03 | SSPFSVIETR | 10 | 356.9 | 21.0117 | flameshift deletion |
| Se112 | IGF2R | NM_000876.3c.2150_2159del<br>ATGAAAGACA | QLNYRGGTPYNTHRELSSPFSVIETREWA<br>SLNIRKRITPPTTSGGTPAMPARRSPWNA       | HLA-A*33:03 | TPYNTHREL  | 10 | 218.3 | 21.0117 | flameshift deletion |
| Se112 | IGF2R | NM_000876.3c.2150_2159del<br>ATGAAAGACA | QLNYRGGTPYNTHRELSSPFSVIETREWA<br>SLNIRKRITPPTTSGGTPAMPARRSPWNA       | HLA-C*14:03 | LNRYRGGTPY | 9  | 250.7 | 21.0117 | flameshift deletion |
| Se112 | IGF2R | NM_000876.3c.2150_2159del<br>ATGAAAGACA | QLNYRGGTPYNTHRELSSPFSVIETREWA<br>SLNIRKRITPPTTSGGTPAMPARRSPWNA       | HLA-A*11:01 | SSPFSVIETR | 10 | 299.9 | 21.0117 | flameshift deletion |
| Se112 | IGF2R | NM_000876.3c.2150_2159del<br>ATGAAAGACA | QLNYRGGTPYNTHRELSSPFSVIETREWA<br>SLNIRKRITPPTTSGGTPAMPARRSPWNA       | HLA-C*14:03 | HRELSSPFS  | 9  | 186.9 | 21.0117 | flameshift deletion |
| Se112 | IGF2R | NM_000876.3c.2150_2159del<br>ATGAAAGACA | QLNYRGGTPYNTHRELSSPFSVIETREWA<br>SLNIRKRITPPTTSGGTPAMPARRSPWNA       | HLA-A*33:03 | SPFSVIETR  | 9  | 481.4 | 21.0117 | flameshift deletion |
| Se112 | IGF2R | NM_000876.3c.2150_2159del<br>ATGAAAGACA | QLNYRGGTPYNTHRELSSPFSVIETREWA<br>SLNIRKRITPPTTSGGTPAMPARRSPWNA       | HLA-B*35:01 | TTSGGTPAM  | 9  | 98.9  | 21.0117 | flameshift deletion |
| Se112 | IGF2R | NM_000876.3c.2150_2159del<br>ATGAAAGACA | QLNYRGGTPYNTHRELSSPFSVIETREWA<br>SLNIRKRITPPTTSGGTPAMPARRSPWNA       | HLA-C*14:03 | TTSGGTPAM  | 9  | 436.9 | 21.0117 | flameshift deletion |
| Se112 | TP53  | NM_001126113.2c.578_581d<br>eLATCT      | CSDSDGLAPPQSEWKEICVWSIWMETL<br>FDIVWCPMSRLRLALTVPPSTTTTCVTV<br>PAWAA | HLA-A*33:03 | VVWCPMSRLR | 10 | 160.7 | 14.2036 | flameshift deletion |
| Se112 | TP53  | NM_001276695.1c.461_464d<br>eLATCT      | CSDSDGLAPPQSEWKEICVWSIWMETL<br>FDIVWCPMSRLRLALTVPPSTTTTCVTV<br>PAWAA | HLA-A*33:03 | IVWCPMSR   | 9  | 25.7  | 14.2036 | flameshift deletion |
| Se112 | TP53  | NM_001126115.1c.182_185d<br>eLATCT      | CSDSDGLAPPQSEWKEICVWSIWMETL<br>FDIVWCPMSRLRLALTVPPSTTTTCVTV<br>PAWAA | HLA-B*35:01 | CPMSRLRLAL | 10 | 397.5 | 14.2036 | flameshift deletion |
| Se112 | TP53  | NM_001276695.1c.461_464d<br>eLATCT      | CSDSDGLAPPQSEWKEICVWSIWMETL<br>FDIVWCPMSRLRLALTVPPSTTTTCVTV<br>PAWAA | HLA-A*11:01 | IVWCPMSR   | 9  | 79.8  | 14.2036 | flameshift deletion |
| Se112 | TP53  | NM_001126118.1c.461_464d<br>eLATCT      | CSDSDGLAPPQSEWKEICVWSIWMETL<br>FDIVWCPMSRLRLALTVPPSTTTTCVTV<br>PAWAA | HLA-B*44:03 | SEWKEICVWS | 10 | 150   | 14.2036 | flameshift deletion |
| Se112 | TP53  | NM_001276695.1c.461_464d<br>eLATCT      | CSDSDGLAPPQSEWKEICVWSIWMETL<br>FDIVWCPMSRLRLALTVPPSTTTTCVTV<br>PAWAA | HLA-A*33:03 | WWCPMSRLR  | 9  | 479.7 | 14.2036 | flameshift deletion |
| Se112 | TP53  | NM_001276695.1c.461_464d<br>eLATCT      | CSDSDGLAPPQSEWKEICVWSIWMETL<br>FDIVWCPMSRLRLALTVPPSTTTTCVTV<br>PAWAA | HLA-B*44:03 | KEICVWSIW  | 9  | 10.7  | 14.2036 | flameshift deletion |
| Se112 | TP53  | NM_001276695.1c.461_464d<br>eLATCT      | CSDSDGLAPPQSEWKEICVWSIWMETL<br>FDIVWCPMSRLRLALTVPPSTTTTCVTV<br>PAWAA | HLA-B*44:03 | SEWKEICVW  | 9  | 12.3  | 14.2036 | flameshift deletion |
| Se112 | TP53  | NM_001276695.1c.461_464d<br>eLATCT      | CSDSDGLAPPQSEWKEICVWSIWMETL<br>FDIVWCPMSRLRLALTVPPSTTTTCVTV<br>PAWAA | HLA-B*44:03 | TETLFDIVW  | 9  | 45.3  | 14.2036 | flameshift deletion |

|       |         |                                   |                                                              |             |             |    |       |         |                     |
|-------|---------|-----------------------------------|--------------------------------------------------------------|-------------|-------------|----|-------|---------|---------------------|
| Se112 | TP53    | NM_001276695.1c.461_464delATCT    | CSDSDDLAPPQSEWKEICVWSIWMETLFDIVWCPMSRLRLALTVPPSTTTTCVTVPAWAA | HLA-C*08:01 | WSIWMETL    | 9  | 84.5  | 14.2036 | flameshift deletion |
| Se112 | TP53    | NM_001276695.1c.461_464delATCT    | CSDSDDLAPPQSEWKEICVWSIWMETLFDIVWCPMSRLRLALTVPPSTTTTCVTVPAWAA | HLA-C*14:03 | VWVCPMSRL   | 9  | 257.2 | 14.2036 | flameshift deletion |
| Se112 | TP53    | NM_001126118.1c.461_464delATCT    | CSDSDDLAPPQSEWKEICVWSIWMETLFDIVWCPMSRLRLALTVPPSTTTTCVTVPAWAA | HLA-A*33:03 | DIVWVCPMSR  | 10 | 46.9  | 14.2036 | flameshift deletion |
| Se112 | TP53    | NM_001126118.1c.461_464delATCT    | CSDSDDLAPPQSEWKEICVWSIWMETLFDIVWCPMSRLRLALTVPPSTTTTCVTVPAWAA | HLA-B*44:03 | WKEICVWSIW  | 10 | 27.1  | 14.2036 | flameshift deletion |
| Se112 | TP53    | NM_001126118.1c.461_464delATCT    | CSDSDDLAPPQSEWKEICVWSIWMETLFDIVWCPMSRLRLALTVPPSTTTTCVTVPAWAA | HLA-B*44:03 | KEICVWSIWM  | 10 | 52.8  | 14.2036 | flameshift deletion |
| Se112 | TP53    | NM_001126118.1c.461_464delATCT    | CSDSDDLAPPQSEWKEICVWSIWMETLFDIVWCPMSRLRLALTVPPSTTTTCVTVPAWAA | HLA-B*44:03 | TETLFDIVWW  | 10 | 69.7  | 14.2036 | flameshift deletion |
| Se112 | TP53    | NM_001126118.1c.461_464delATCT    | CSDSDDLAPPQSEWKEICVWSIWMETLFDIVWCPMSRLRLALTVPPSTTTTCVTVPAWAA | HLA-B*44:03 | MTETLFDIVW  | 10 | 69.8  | 14.2036 | flameshift deletion |
| Se112 | TP53    | NM_001126118.1c.461_464delATCT    | CSDSDDLAPPQSEWKEICVWSIWMETLFDIVWCPMSRLRLALTVPPSTTTTCVTVPAWAA | HLA-B*44:03 | LSEWKEICVW  | 10 | 81.9  | 14.2036 | flameshift deletion |
| Se112 | TP53    | NM_001126118.1c.461_464delATCT    | CSDSDDLAPPQSEWKEICVWSIWMETLFDIVWCPMSRLRLALTVPPSTTTTCVTVPAWAA | HLA-C*14:03 | WSIWMETL    | 9  | 311   | 14.2036 | flameshift deletion |
| Se112 | ZCWPW1  | NM_001258008.1c.106delT           | KSYLLPCSPNPLRRRPRGSVPQRQRP                                   | HLA-C*14:03 | LLPCSPNPL   | 9  | 197.6 | 1.14403 | flameshift deletion |
| Se112 | SRA1    | NM_001035235.3c.14_22delCCGCTGGCC | MTRCQAEVEMAELYV                                              | HLA-B*44:03 | AEVEMAELY   | 9  | 7.6   | 10.1833 | inframe deletion    |
| Se112 | SRA1    | NM_001035235.3c.14_22delCCGCTGGCC | MTRCQAEVEMAELYV                                              | HLA-B*44:03 | QAEVEMAELY  | 10 | 29.2  | 10.1833 | inframe deletion    |
| Se112 | SRA1    | NM_001035235.3c.14_22delCCGCTGGCC | MTRCQAEVEMAELYV                                              | HLA-B*44:03 | AEVEMAELYV  | 10 | 51.6  | 10.1833 | inframe deletion    |
| Se112 | TBC1D32 | NM_152730.5c.1128_1133delATATAA   | RTTVLRLLLETKSLVTTAIQQCV                                      | HLA-A*11:01 | TVLRLLLETK  | 9  | 26.4  | 1.16682 | inframe deletion    |
| Se112 | TBC1D32 | NM_152730.5c.1128_1133delATATAA   | RTTVLRLLLETKSLVTTAIQQCV                                      | HLA-A*11:01 | TTVLRLLLETK | 10 | 35.3  | 1.16682 | inframe deletion    |
| Se112 | RARG    | NM_000966.5c.1143_1148delGAAAAT   | PSQPYMFPRMLITDLRGISTKG                                       | HLA-A*33:03 | PSQPYMFPR   | 9  | 214.6 | 22.4975 | inframe deletion    |
| Se112 | RARG    | NM_000966.5c.1143_1148delGAAAAT   | PSQPYMFPRMLITDLRGISTKG                                       | HLA-B*35:01 | FPRMLITDL   | 9  | 137.8 | 22.4975 | inframe deletion    |
| Se112 | RARG    | NM_000966.5c.1143_1148delGAAAAT   | PSQPYMFPRMLITDLRGISTKG                                       | HLA-C*14:03 | SQPYMFPRM   | 9  | 349   | 22.4975 | inframe deletion    |
| Se112 | RARG    | NM_000966.5c.1143_1148delGAAAAT   | PSQPYMFPRMLITDLRGISTKG                                       | HLA-C*14:03 | PYMFPRMLI   | 9  | 480   | 22.4975 | inframe deletion    |
| Se112 | RARG    | NM_000966.5c.1143_1148delGAAAAT   | PSQPYMFPRMLITDLRGISTKG                                       | HLA-A*11:01 | ITDLRGISTK  | 10 | 63.5  | 22.4975 | inframe deletion    |
| Se112 | RARG    | NM_000966.5c.1143_1148delGAAAAT   | PSQPYMFPRMLITDLRGISTKG                                       | HLA-A*33:03 | FPRMLITDLR  | 10 | 420.8 | 22.4975 | inframe deletion    |
| Se112 | RARG    | NM_000966.5c.1143_1148delGAAAAT   | PSQPYMFPRMLITDLRGISTKG                                       | HLA-C*14:03 | MFPRMLITDL  | 10 | 454.4 | 22.4975 | inframe deletion    |
| Se114 | APOBR   | NM_018690.3c.2300delG             | QTGSVAAGIMGVMSHTSALLALVKLWKGCLGKAGTRKKRKRQESMQVGKNLVWRAQRKR  | HLA-A*02:01 | KLWKGCLGKA  | 10 | 270.4 | 3.09233 | flameshift deletion |

|       |         |                                                           |                                                                                   |             |             |    |       |         |                     |
|-------|---------|-----------------------------------------------------------|-----------------------------------------------------------------------------------|-------------|-------------|----|-------|---------|---------------------|
| Se114 | APOBR   | NM_018690.3c.2300delG                                     | QTGSVAAGIMGVMWSHTSALLALVKLWK<br>GCLGKAGTRKKRRKQQESMQVGKNLV<br>WRAQQRKR            | HLA-A*02:01 | GSVAAGIMGV  | 10 | 269.6 | 3.09233 | flameshift deletion |
| Se114 | APOBR   | NM_018690.3c.2300delG                                     | QTGSVAAGIMGVMWSHTSALLALVKLWK<br>GCLGKAGTRKKRRKQQESMQVGKNLV<br>WRAQQRKR            | HLA-A*02:01 | GVMWSHTSAL  | 10 | 191.5 | 3.09233 | flameshift deletion |
| Se114 | APOBR   | NM_018690.3c.2300delG                                     | QTGSVAAGIMGVMWSHTSALLALVKLWK<br>GCLGKAGTRKKRRKQQESMQVGKNLV<br>WRAQQRKR            | HLA-C*01:02 | VMWSHTSAL   | 9  | 333.1 | 3.09233 | flameshift deletion |
| Se114 | APOBR   | NM_018690.3c.2300delG                                     | QTGSVAAGIMGVMWSHTSALLALVKLWK<br>GCLGKAGTRKKRRKQQESMQVGKNLV<br>WRAQQRKR            | HLA-A*24:02 | MWSHTSALL   | 9  | 272.1 | 3.09233 | flameshift deletion |
| Se114 | APOBR   | NM_018690.3c.2300delG                                     | QTGSVAAGIMGVMWSHTSALLALVKLWK<br>GCLGKAGTRKKRRKQQESMQVGKNLV<br>WRAQQRKR            | HLA-A*02:01 | HTSALLALV   | 9  | 119.7 | 3.09233 | flameshift deletion |
| Se114 | APOBR   | NM_018690.3c.2300delG                                     | QTGSVAAGIMGVMWSHTSALLALVKLWK<br>GCLGKAGTRKKRRKQQESMQVGKNLV<br>WRAQQRKR            | HLA-A*02:01 | VMWSHTSAL   | 9  | 14.5  | 3.09233 | flameshift deletion |
| Se114 | APOBR   | NM_018690.3c.2300delG                                     | QTGSVAAGIMGVMWSHTSALLALVKLWK<br>GCLGKAGTRKKRRKQQESMQVGKNLV<br>WRAQQRKR            | HLA-A*02:01 | SV AAGIMGV  | 9  | 13.9  | 3.09233 | flameshift deletion |
| Se114 | APOBR   | NM_018690.3c.2300delG                                     | QTGSVAAGIMGVMWSHTSALLALVKLWK<br>GCLGKAGTRKKRRKQQESMQVGKNLV<br>WRAQQRKR            | HLA-A*02:01 | VMWSHTSALL  | 10 | 62    | 3.09233 | flameshift deletion |
| Se114 | APOBR   | NM_018690.3c.2300delG                                     | QTGSVAAGIMGVMWSHTSALLALVKLWK<br>GCLGKAGTRKKRRKQQESMQVGKNLV<br>WRAQQRKR            | HLA-A*02:01 | GIMGVMWSHT  | 10 | 177   | 3.09233 | flameshift deletion |
| Se114 | CCDC88B | NM_032251.5c.298delC                                      | WRVWNLNHLWGD                                                                      | HLA-A*24:02 | RVWNLNHLW   | 9  | 339.7 | 2.82615 | flameshift deletion |
| Se114 | EXD3    | NM_017820.4c.1334_1358del<br>TTTCCCGGCTGGTGGCC<br>AGCTCCT | SQPPTGGAQASRTPLSPSWATGWWGTC<br>KNWARPAPPWPMWRSRFFAAWTCCWCT<br>DRCGWRACQPQWTGPGS   | HLA-A*24:02 | RFWAAWTCCW  | 10 | 72.3  | 2.85454 | flameshift deletion |
| Se114 | EXD3    | NM_017820.4c.1355delT                                     | GAQAFSRLVAQPSRTPLSPSWATGWWGT<br>CKNWARPAPPWPMWRSRFFAAWTCCW<br>CTDRCGWRACQPQWTGPGS | HLA-B*54:01 | WPMWRSRFFWA | 10 | 20    | 2.85454 | flameshift deletion |
| Se114 | EXD3    | NM_017820.4c.1355delT                                     | GAQAFSRLVAQPSRTPLSPSWATGWWGT<br>CKNWARPAPPWPMWRSRFFAAWTCCW<br>CTDRCGWRACQPQWTGPGS | HLA-A*24:02 | MWRSRFFAAW  | 10 | 108.9 | 2.85454 | flameshift deletion |
| Se114 | EXD3    | NM_017820.4c.1355delT                                     | GAQAFSRLVAQPSRTPLSPSWATGWWGT<br>CKNWARPAPPWPMWRSRFFAAWTCCW<br>CTDRCGWRACQPQWTGPGS | HLA-A*02:01 | WPMWRSRFFWA | 10 | 292.4 | 2.85454 | flameshift deletion |
| Se114 | EXD3    | NM_017820.4c.1355delT                                     | GAQAFSRLVAQPSRTPLSPSWATGWWGT<br>CKNWARPAPPWPMWRSRFFAAWTCCW<br>CTDRCGWRACQPQWTGPGS | HLA-B*54:01 | TPLSPSWAT   | 9  | 283.2 | 2.85454 | flameshift deletion |
| Se114 | EXD3    | NM_017820.4c.1355delT                                     | GAQAFSRLVAQPSRTPLSPSWATGWWGT<br>CKNWARPAPPWPMWRSRFFAAWTCCW<br>CTDRCGWRACQPQWTGPGS | HLA-A*24:02 | FWAAWTCCW   | 9  | 244.6 | 2.85454 | flameshift deletion |
| Se114 | PPA2    | NM_006903.4c.342_358delG<br>AATCCCATTAACAAT               | NAKMEIATKEPICKGWKATLCGEYLPQG<br>LYMELWYPPSDSFLWRSYSCEDPWNFGSY                     | HLA-A*02:01 | GLYMELWYP   | 9  | 288.6 | 10.9813 | flameshift deletion |
| Se114 | PPA2    | NM_006903.4c.342_358delG<br>AATCCCATTAACAAT               | NAKMEIATKEPICKGWKATLCGEYLPQG<br>LYMELWYPPSDSFLWRSYSCEDPWNFGSY                     | HLA-A*02:01 | TLCGEYLP    | 9  | 155.5 | 10.9813 | flameshift deletion |
| Se114 | PPA2    | NM_006903.4c.342_358delG<br>AATCCCATTAACAAT               | NAKMEIATKEPICKGWKATLCGEYLPQG<br>LYMELWYPPSDSFLWRSYSCEDPWNFGSY                     | HLA-A*02:01 | YLPLQGLYM   | 9  | 475.3 | 10.9813 | flameshift deletion |
| Se114 | PPA2    | NM_006903.4c.342_358delG<br>AATCCCATTAACAAT               | NAKMEIATKEPICKGWKATLCGEYLPQG<br>LYMELWYPPSDSFLWRSYSCEDPWNFGSY                     | HLA-A*24:02 | LWYPPSDSF   | 9  | 81.5  | 10.9813 | flameshift deletion |
| Se114 | PPA2    | NM_006903.4c.342_358delG<br>AATCCCATTAACAAT               | NAKMEIATKEPICKGWKATLCGEYLPQG<br>LYMELWYPPSDSFLWRSYSCEDPWNFGSY                     | HLA-B*54:01 | EPICKGWKA   | 9  | 366.6 | 10.9813 | flameshift deletion |
| Se114 | PPA2    | NM_006903.4c.342_358delG<br>AATCCCATTAACAAT               | NAKMEIATKEPICKGWKATLCGEYLPQG<br>LYMELWYPPSDSFLWRSYSCEDPWNFGSY                     | HLA-A*24:02 | SYSCEDPWNF  | 10 | 64.5  | 10.9813 | flameshift deletion |
| Se114 | PPA2    | NM_006903.4c.342_358delG<br>AATCCCATTAACAAT               | NAKMEIATKEPICKGWKATLCGEYLPQG<br>LYMELWYPPSDSFLWRSYSCEDPWNFGSY                     | HLA-A*02:01 | LPLQGLYMEL  | 10 | 136.4 | 10.9813 | flameshift deletion |

|       |       |                                                                             |                                                                                                                                                |             |             |    |       |         |                     |
|-------|-------|-----------------------------------------------------------------------------|------------------------------------------------------------------------------------------------------------------------------------------------|-------------|-------------|----|-------|---------|---------------------|
| Se114 | PPA2  | NM_006903.4c.342_358delG<br>AATCCCAATTAACAAT                                | NAKMEIATKEPICKGWKATLCGEYLPQQ<br>LYMELWYPPSDSFLWRSYSCEDPWNFGSY                                                                                  | HLA-A*24:02 | WYPPSDSFLW  | 10 | 27.6  | 10.9813 | flameshift deletion |
| Se114 | PPA2  | NM_006903.4c.342_358delG<br>AATCCCAATTAACAAT                                | NAKMEIATKEPICKGWKATLCGEYLPQQ<br>LYMELWYPPSDSFLWRSYSCEDPWNFGSY                                                                                  | HLA-A*02:01 | ATLCGEYLP   | 10 | 460.3 | 10.9813 | flameshift deletion |
| Se114 | PHF3  | NM_015153.3c.3851_3853del<br>CTT                                            | RFTPVTEEDQIYTLLFAYFSSR                                                                                                                         | HLA-A*24:02 | IYTLLFAYF   | 9  | 26.3  | 9.82966 | inframe deletion    |
| Se114 | PHF3  | NM_015153.3c.3851_3853del<br>CTT                                            | RFTPVTEEDQIYTLLFAYFSSR                                                                                                                         | HLA-A*24:02 | QIYTLLFAYF  | 10 | 100.5 | 9.82966 | inframe deletion    |
| Se114 | PHF3  | NM_015153.3c.3851_3853del<br>CTT                                            | RFTPVTEEDQIYTLLFAYFSSR                                                                                                                         | HLA-A*24:02 | IYTLLFAYFS  | 10 | 465   | 9.82966 | inframe deletion    |
| Se115 | ABHD8 | NM_024527.4c.215_254delT<br>CTCCGGCTTGGTCCGCTG<br>TCAGGCCGGGATCACCGT<br>GTA | SSASSDAAQGDPAAMGGCWWKTWAEPLP<br>TSYTGRMALGSRPPWRWSWQIRRAAMA<br>AWPPAAQAAAAA VAVVGGGGEPGAPRGP<br>SILTVRSASLAAPRPTWCSFSSMVS AVP<br>WPSGRSSWTSLCA | HLA-B*07:02 | WPPAAQAAAA  | 10 | 303.9 | 8.13653 | flameshift deletion |
| Se115 | ABHD8 | NM_024527.4c.215_254delT<br>CTCCGGCTTGGTCCGCTG<br>TCAGGCCGGGATCACCGT<br>GTA | SSASSDAAQGDPAAMGGCWWKTWAEPLP<br>TSYTGRMALGSRPPWRWSWQIRRAAMA<br>AWPPAAQAAAAA VAVVGGGGEPGAPRGP<br>SILTVRSASLAAPRPTWCSFSSMVS AVP<br>WPSGRSSWTSLCA | HLA-B*07:02 | KAPRPTWCSF  | 10 | 24.9  | 8.13653 | flameshift deletion |
| Se115 | ABHD8 | NM_024527.4c.215_254delT<br>CTCCGGCTTGGTCCGCTG<br>TCAGGCCGGGATCACCGT<br>GTA | SSASSDAAQGDPAAMGGCWWKTWAEPLP<br>TSYTGRMALGSRPPWRWSWQIRRAAMA<br>AWPPAAQAAAAA VAVVGGGGEPGAPRGP<br>SILTVRSASLAAPRPTWCSFSSMVS AVP<br>WPSGRSSWTSLCA | HLA-B*07:02 | RPPWRWSWQI  | 10 | 193.8 | 8.13653 | flameshift deletion |
| Se115 | ABHD8 | NM_024527.4c.215_254delT<br>CTCCGGCTTGGTCCGCTG<br>TCAGGCCGGGATCACCGT<br>GTA | SSASSDAAQGDPAAMGGCWWKTWAEPLP<br>TSYTGRMALGSRPPWRWSWQIRRAAMA<br>AWPPAAQAAAAA VAVVGGGGEPGAPRGP<br>SILTVRSASLAAPRPTWCSFSSMVS AVP<br>WPSGRSSWTSLCA | HLA-B*07:02 | APRPTWCSFS  | 10 | 205.7 | 8.13653 | flameshift deletion |
| Se115 | ABHD8 | NM_024527.4c.215_254delT<br>CTCCGGCTTGGTCCGCTG<br>TCAGGCCGGGATCACCGT<br>GTA | SSASSDAAQGDPAAMGGCWWKTWAEPLP<br>TSYTGRMALGSRPPWRWSWQIRRAAMA<br>AWPPAAQAAAAA VAVVGGGGEPGAPRGP<br>SILTVRSASLAAPRPTWCSFSSMVS AVP<br>WPSGRSSWTSLCA | HLA-B*07:02 | VPWPSGRSSW  | 10 | 464.5 | 8.13653 | flameshift deletion |
| Se115 | ABHD8 | NM_024527.4c.215_254delT<br>CTCCGGCTTGGTCCGCTG<br>TCAGGCCGGGATCACCGT<br>GTA | SSASSDAAQGDPAAMGGCWWKTWAEPLP<br>TSYTGRMALGSRPPWRWSWQIRRAAMA<br>AWPPAAQAAAAA VAVVGGGGEPGAPRGP<br>SILTVRSASLAAPRPTWCSFSSMVS AVP<br>WPSGRSSWTSLCA | HLA-B*55:02 | WPPAAQAAAA  | 10 | 138.1 | 8.13653 | flameshift deletion |
| Se115 | ABHD8 | NM_024527.4c.215_254delT<br>CTCCGGCTTGGTCCGCTG<br>TCAGGCCGGGATCACCGT<br>GTA | SSASSDAAQGDPAAMGGCWWKTWAEPLP<br>TSYTGRMALGSRPPWRWSWQIRRAAMA<br>AWPPAAQAAAAA VAVVGGGGEPGAPRGP<br>SILTVRSASLAAPRPTWCSFSSMVS AVP<br>WPSGRSSWTSLCA | HLA-B*55:02 | RPTWCSFSSM  | 10 | 294.1 | 8.13653 | flameshift deletion |
| Se115 | ABHD8 | NM_024527.4c.215_254delT<br>CTCCGGCTTGGTCCGCTG<br>TCAGGCCGGGATCACCGT<br>GTA | SSASSDAAQGDPAAMGGCWWKTWAEPLP<br>TSYTGRMALGSRPPWRWSWQIRRAAMA<br>AWPPAAQAAAAA VAVVGGGGEPGAPRGP<br>SILTVRSASLAAPRPTWCSFSSMVS AVP<br>WPSGRSSWTSLCA | HLA-B*55:02 | MAAWPPAAQA  | 10 | 491.6 | 8.13653 | flameshift deletion |
| Se115 | ABHD8 | NM_024527.4c.215_254delT<br>CTCCGGCTTGGTCCGCTG<br>TCAGGCCGGGATCACCGT<br>GTA | SSASSDAAQGDPAAMGGCWWKTWAEPLP<br>TSYTGRMALGSRPPWRWSWQIRRAAMA<br>AWPPAAQAAAAA VAVVGGGGEPGAPRGP<br>SILTVRSASLAAPRPTWCSFSSMVS AVP<br>WPSGRSSWTSLCA | HLA-B*07:02 | APRGP SILTV | 10 | 20.7  | 8.13653 | flameshift deletion |

|       |       |                                                                             |                                                                                                                                                |             |            |    |       |         |                     |
|-------|-------|-----------------------------------------------------------------------------|------------------------------------------------------------------------------------------------------------------------------------------------|-------------|------------|----|-------|---------|---------------------|
| Se115 | ABHD8 | NM_024527.4c.215_254delT<br>CTCCGGCTTGGTCCGCTG<br>TCAGGCCGGGATCACCGT<br>GTA | SSASSDAAQGDPAAMGGCWWKTWAEPL<br>EPTSYTGRMALGSRPPWRWSWQIRRAAMA<br>AWPPAAQAAAAA VAVVGGGGEPGAPRGP<br>SILTVRSASLAAPRPTWCSFSSMVS AV<br>WPSGRSSWTSLCA | HLA-B*07:02 | RPTWCSFSSM | 10 | 5.4   | 8.13653 | flameshift deletion |
| Se115 | ABHD8 | NM_024527.4c.215_254delT<br>CTCCGGCTTGGTCCGCTG<br>TCAGGCCGGGATCACCGT<br>GTA | SSASSDAAQGDPAAMGGCWWKTWAEPL<br>EPTSYTGRMALGSRPPWRWSWQIRRAAMA<br>AWPPAAQAAAAA VAVVGGGGEPGAPRGP<br>SILTVRSASLAAPRPTWCSFSSMVS AV<br>WPSGRSSWTSLCA | HLA-A*24:02 | CWWKTWAEPL | 10 | 376.4 | 8.13653 | flameshift deletion |
| Se115 | ABHD8 | NM_024527.4c.215_254delT<br>CTCCGGCTTGGTCCGCTG<br>TCAGGCCGGGATCACCGT<br>GTA | SSASSDAAQGDPAAMGGCWWKTWAEPL<br>EPTSYTGRMALGSRPPWRWSWQIRRAAMA<br>AWPPAAQAAAAA VAVVGGGGEPGAPRGP<br>SILTVRSASLAAPRPTWCSFSSMVS AV<br>WPSGRSSWTSLCA | HLA-C*07:02 | RRPPWRWSW  | 9  | 446.4 | 8.13653 | flameshift deletion |
| Se115 | ABHD8 | NM_024527.4c.215_254delT<br>CTCCGGCTTGGTCCGCTG<br>TCAGGCCGGGATCACCGT<br>GTA | SSASSDAAQGDPAAMGGCWWKTWAEPL<br>EPTSYTGRMALGSRPPWRWSWQIRRAAMA<br>AWPPAAQAAAAA VAVVGGGGEPGAPRGP<br>SILTVRSASLAAPRPTWCSFSSMVS AV<br>WPSGRSSWTSLCA | HLA-B*55:02 | AAMAAWPPA  | 9  | 439   | 8.13653 | flameshift deletion |
| Se115 | ABHD8 | NM_024527.4c.215_254delT<br>CTCCGGCTTGGTCCGCTG<br>TCAGGCCGGGATCACCGT<br>GTA | SSASSDAAQGDPAAMGGCWWKTWAEPL<br>EPTSYTGRMALGSRPPWRWSWQIRRAAMA<br>AWPPAAQAAAAA VAVVGGGGEPGAPRGP<br>SILTVRSASLAAPRPTWCSFSSMVS AV<br>WPSGRSSWTSLCA | HLA-B*55:02 | WSWQIRRAA  | 9  | 401   | 8.13653 | flameshift deletion |
| Se115 | ABHD8 | NM_024527.4c.215_254delT<br>CTCCGGCTTGGTCCGCTG<br>TCAGGCCGGGATCACCGT<br>GTA | SSASSDAAQGDPAAMGGCWWKTWAEPL<br>EPTSYTGRMALGSRPPWRWSWQIRRAAMA<br>AWPPAAQAAAAA VAVVGGGGEPGAPRGP<br>SILTVRSASLAAPRPTWCSFSSMVS AV<br>WPSGRSSWTSLCA | HLA-B*55:02 | RPTWCSFSS  | 9  | 238.2 | 8.13653 | flameshift deletion |
| Se115 | ABHD8 | NM_024527.4c.215_254delT<br>CTCCGGCTTGGTCCGCTG<br>TCAGGCCGGGATCACCGT<br>GTA | SSASSDAAQGDPAAMGGCWWKTWAEPL<br>EPTSYTGRMALGSRPPWRWSWQIRRAAMA<br>AWPPAAQAAAAA VAVVGGGGEPGAPRGP<br>SILTVRSASLAAPRPTWCSFSSMVS AV<br>WPSGRSSWTSLCA | HLA-B*55:02 | VPWPSGRSS  | 9  | 215.8 | 8.13653 | flameshift deletion |
| Se115 | ABHD8 | NM_024527.4c.215_254delT<br>CTCCGGCTTGGTCCGCTG<br>TCAGGCCGGGATCACCGT<br>GTA | SSASSDAAQGDPAAMGGCWWKTWAEPL<br>EPTSYTGRMALGSRPPWRWSWQIRRAAMA<br>AWPPAAQAAAAA VAVVGGGGEPGAPRGP<br>SILTVRSASLAAPRPTWCSFSSMVS AV<br>WPSGRSSWTSLCA | HLA-B*07:02 | TSYTGRMAL  | 9  | 280.8 | 8.13653 | flameshift deletion |
| Se115 | ABHD8 | NM_024527.4c.215_254delT<br>CTCCGGCTTGGTCCGCTG<br>TCAGGCCGGGATCACCGT<br>GTA | SSASSDAAQGDPAAMGGCWWKTWAEPL<br>EPTSYTGRMALGSRPPWRWSWQIRRAAMA<br>AWPPAAQAAAAA VAVVGGGGEPGAPRGP<br>SILTVRSASLAAPRPTWCSFSSMVS AV<br>WPSGRSSWTSLCA | HLA-B*07:02 | RPTWCSFSS  | 9  | 207.9 | 8.13653 | flameshift deletion |
| Se115 | ABHD8 | NM_024527.4c.215_254delT<br>CTCCGGCTTGGTCCGCTG<br>TCAGGCCGGGATCACCGT<br>GTA | SSASSDAAQGDPAAMGGCWWKTWAEPL<br>EPTSYTGRMALGSRPPWRWSWQIRRAAMA<br>AWPPAAQAAAAA VAVVGGGGEPGAPRGP<br>SILTVRSASLAAPRPTWCSFSSMVS AV<br>WPSGRSSWTSLCA | HLA-B*07:02 | SGRSSWTSL  | 9  | 202.6 | 8.13653 | flameshift deletion |
| Se115 | ABHD8 | NM_024527.4c.215_254delT<br>CTCCGGCTTGGTCCGCTG<br>TCAGGCCGGGATCACCGT<br>GTA | SSASSDAAQGDPAAMGGCWWKTWAEPL<br>EPTSYTGRMALGSRPPWRWSWQIRRAAMA<br>AWPPAAQAAAAA VAVVGGGGEPGAPRGP<br>SILTVRSASLAAPRPTWCSFSSMVS AV<br>WPSGRSSWTSLCA | HLA-B*07:02 | APRPTWCSF  | 9  | 6.8   | 8.13653 | flameshift deletion |
| Se115 | ABHD8 | NM_024527.4c.215_254delT<br>CTCCGGCTTGGTCCGCTG<br>TCAGGCCGGGATCACCGT<br>GTA | SSASSDAAQGDPAAMGGCWWKTWAEPL<br>EPTSYTGRMALGSRPPWRWSWQIRRAAMA<br>AWPPAAQAAAAA VAVVGGGGEPGAPRGP<br>SILTVRSASLAAPRPTWCSFSSMVS AV<br>WPSGRSSWTSLCA | HLA-B*55:02 | WPPAAQAAA  | 9  | 216.4 | 8.13653 | flameshift deletion |



|       |          |                                                                 |                                                                                                                                                |             |            |    |       |         |                     |
|-------|----------|-----------------------------------------------------------------|------------------------------------------------------------------------------------------------------------------------------------------------|-------------|------------|----|-------|---------|---------------------|
| Se115 | ABHD8    | NM_024527.4c.215_254delTCTCCGGCTTGGTCCGCTGTCAGCGCCGGATCACCGTGTA | SSASSDAAQGDPAAMGGCWKWTWAEPLP<br>TSYTGRRMALGSRPPWRWSWQIRRAAMA<br>AWPPAAQAAAAA AVVGGGGEPGAPRGP<br>SILTVRSASLAAPRPTWCSFSSMVS AVP<br>WPSGRSSWTSLCA | HLA-B*07:02 | APRGPSSILT | 9  | 138.5 | 8.13653 | flameshift deletion |
| Se115 | ABHD8    | NM_024527.4c.215_254delTCTCCGGCTTGGTCCGCTGTCAGCGCCGGATCACCGTGTA | SSASSDAAQGDPAAMGGCWKWTWAEPLP<br>TSYTGRRMALGSRPPWRWSWQIRRAAMA<br>AWPPAAQAAAAA AVVGGGGEPGAPRGP<br>SILTVRSASLAAPRPTWCSFSSMVS AVP<br>WPSGRSSWTSLCA | HLA-B*07:02 | TVRSASLAA  | 9  | 365.9 | 8.13653 | flameshift deletion |
| Se115 | AHNAK2   | NM_138420.2c.1993_1994delGA                                     | EKRLKKEQILTKGSGHQVQNAQVQD<br>AIVRGVSPRVHGGGLGGVC AEGGRRREP<br>PLHAGGPQDH                                                                       | HLA-B*07:02 | SPRVHGGGL  | 9  | 4.8   | 4.71252 | flameshift deletion |
| Se115 | AHNAK2   | NM_138420.2c.1993_1994delGA                                     | EKRLKKEQILTKGSGHQVQNAQVQD<br>AIVRGVSPRVHGGGLGGVC AEGGRRREP<br>PLHAGGPQDH                                                                       | HLA-B*07:02 | SPRVHGGGLG | 10 | 132.2 | 4.71252 | flameshift deletion |
| Se115 | AHNAK2   | NM_138420.2c.1993_1994delGA                                     | EKRLKKEQILTKGSGHQVQNAQVQD<br>AIVRGVSPRVHGGGLGGVC AEGGRRREP<br>PLHAGGPQDH                                                                       | HLA-B*07:02 | VSPRVHGGGL | 10 | 38.5  | 4.71252 | flameshift deletion |
| Se115 | C1orf186 | NM_001007544.3c.224_227delGAGA                                  | AVKEMKETQTETSQCLIPFGMTATHPQIA<br>WIAPAVRLLPARPQRMWTHKSSFLTLEN                                                                                  | HLA-B*07:02 | APAVRLLPA  | 9  | 29.8  | 86.6022 | flameshift deletion |
| Se115 | C1orf186 | NM_001007544.3c.224_227delGAGA                                  | AVKEMKETQTETSQCLIPFGMTATHPQIA<br>WIAPAVRLLPARPQRMWTHKSSFLTLEN                                                                                  | HLA-B*07:02 | IAPAVRLLPA | 10 | 328.1 | 86.6022 | flameshift deletion |
| Se115 | C1orf186 | NM_001007544.3c.224_227delGAGA                                  | AVKEMKETQTETSQCLIPFGMTATHPQIA<br>WIAPAVRLLPARPQRMWTHKSSFLTLEN                                                                                  | HLA-B*55:02 | LPARPQRMWI | 10 | 446.9 | 86.6022 | flameshift deletion |
| Se115 | C1orf186 | NM_001007544.3c.224_227delGAGA                                  | AVKEMKETQTETSQCLIPFGMTATHPQIA<br>WIAPAVRLLPARPQRMWTHKSSFLTLEN                                                                                  | HLA-B*55:02 | LIPFGMTAT  | 10 | 142.7 | 86.6022 | flameshift deletion |
| Se115 | C1orf186 | NM_001007544.3c.224_227delGAGA                                  | AVKEMKETQTETSQCLIPFGMTATHPQIA<br>WIAPAVRLLPARPQRMWTHKSSFLTLEN                                                                                  | HLA-B*55:02 | IAPAVRLLPA | 10 | 84    | 86.6022 | flameshift deletion |
| Se115 | C1orf186 | NM_001007544.3c.224_227delGAGA                                  | AVKEMKETQTETSQCLIPFGMTATHPQIA<br>WIAPAVRLLPARPQRMWTHKSSFLTLEN                                                                                  | HLA-B*55:02 | HPQIAWIAPA | 10 | 25.6  | 86.6022 | flameshift deletion |
| Se115 | C1orf186 | NM_001007544.3c.224_227delGAGA                                  | AVKEMKETQTETSQCLIPFGMTATHPQIA<br>WIAPAVRLLPARPQRMWTHKSSFLTLEN                                                                                  | HLA-B*07:02 | HPQIAWIAPA | 10 | 134.9 | 86.6022 | flameshift deletion |
| Se115 | C1orf186 | NM_001007544.3c.224_227delGAGA                                  | AVKEMKETQTETSQCLIPFGMTATHPQIA<br>WIAPAVRLLPARPQRMWTHKSSFLTLEN                                                                                  | HLA-B*07:02 | LPARPQRMWI | 10 | 52.6  | 86.6022 | flameshift deletion |
| Se115 | C1orf186 | NM_001007544.3c.224_227delGAGA                                  | AVKEMKETQTETSQCLIPFGMTATHPQIA<br>WIAPAVRLLPARPQRMWTHKSSFLTLEN                                                                                  | HLA-B*07:02 | IPFGMTAT   | 9  | 361.9 | 86.6022 | flameshift deletion |
| Se115 | C1orf186 | NM_001007544.3c.224_227delGAGA                                  | AVKEMKETQTETSQCLIPFGMTATHPQIA<br>WIAPAVRLLPARPQRMWTHKSSFLTLEN                                                                                  | HLA-A*24:02 | RMWTHKSSF  | 10 | 375   | 86.6022 | flameshift deletion |
| Se115 | C1orf186 | NM_001007544.3c.224_227delGAGA                                  | AVKEMKETQTETSQCLIPFGMTATHPQIA<br>WIAPAVRLLPARPQRMWTHKSSFLTLEN                                                                                  | HLA-A*26:01 | ETSQCLIPF  | 9  | 67.6  | 86.6022 | flameshift deletion |
| Se115 | C1orf186 | NM_001007544.3c.224_227delGAGA                                  | AVKEMKETQTETSQCLIPFGMTATHPQIA<br>WIAPAVRLLPARPQRMWTHKSSFLTLEN                                                                                  | HLA-A*24:02 | MWTHKSSF   | 9  | 196.3 | 86.6022 | flameshift deletion |
| Se115 | C1orf186 | NM_001007544.3c.224_227delGAGA                                  | AVKEMKETQTETSQCLIPFGMTATHPQIA<br>WIAPAVRLLPARPQRMWTHKSSFLTLEN                                                                                  | HLA-B*55:02 | IPFGMTAT   | 9  | 66.6  | 86.6022 | flameshift deletion |
| Se115 | C1orf186 | NM_001007544.3c.224_227delGAGA                                  | AVKEMKETQTETSQCLIPFGMTATHPQIA<br>WIAPAVRLLPARPQRMWTHKSSFLTLEN                                                                                  | HLA-B*55:02 | APAVRLLPA  | 9  | 54.4  | 86.6022 | flameshift deletion |
| Se115 | CCDC85C  | NM_001144995.1c.884_885delAG                                    | DKLLAQAGSGVPHAAERLLALPLGVPA<br>VPAALLPGLPAERPLPRT                                                                                              | HLA-B*07:02 | VPHAAERLLA | 10 | 441.9 | 11.3808 | flameshift deletion |
| Se115 | CCDC85C  | NM_001144995.1c.884_885delAG                                    | DKLLAQAGSGVPHAAERLLALPLGVPA<br>VPAALLPGLPAERPLPRT                                                                                              | HLA-B*55:02 | LALPLGVPA  | 9  | 204.2 | 11.3808 | flameshift deletion |

|       |         |                                              |                                                                                             |             |            |    |       |         |                       |
|-------|---------|----------------------------------------------|---------------------------------------------------------------------------------------------|-------------|------------|----|-------|---------|-----------------------|
| Se115 | CCDC85C | NM_001144995.1c.884_885d<br>eLAG             | DKLLAQAGSGVPHAAERLLALPLGVPA<br>VPAALLPGLPAERPGLPRT                                          | HLA-B*55:02 | VPACVPAAL  | 9  | 246.5 | 11.3808 | flameshift deletion   |
| Se115 | CCDC85C | NM_001144995.1c.884_885d<br>eLAG             | DKLLAQAGSGVPHAAERLLALPLGVPA<br>VPAALLPGLPAERPGLPRT                                          | HLA-B*55:02 | VPHAAERLLA | 10 | 188.4 | 11.3808 | flameshift deletion   |
| Se115 | CCDC85C | NM_001144995.1c.884_885d<br>eLAG             | DKLLAQAGSGVPHAAERLLALPLGVPA<br>VPAALLPGLPAERPGLPRT                                          | HLA-B*07:02 | GVPACVPAAL | 10 | 68.6  | 11.3808 | flameshift deletion   |
| Se115 | CCDC85C | NM_001144995.1c.884_885d<br>eLAG             | DKLLAQAGSGVPHAAERLLALPLGVPA<br>VPAALLPGLPAERPGLPRT                                          | HLA-B*07:02 | VPACVPAALL | 10 | 40.9  | 11.3808 | flameshift deletion   |
| Se115 | CCDC85C | NM_001144995.1c.884_885d<br>eLAG             | DKLLAQAGSGVPHAAERLLALPLGVPA<br>VPAALLPGLPAERPGLPRT                                          | HLA-C*07:02 | HAAERLLAL  | 9  | 491.6 | 11.3808 | flameshift deletion   |
| Se115 | CCDC85C | NM_001144995.1c.884_885d<br>eLAG             | DKLLAQAGSGVPHAAERLLALPLGVPA<br>VPAALLPGLPAERPGLPRT                                          | HLA-B*07:02 | VPACVPAAL  | 9  | 10.2  | 11.3808 | flameshift deletion   |
| Se115 | CCDC85C | NM_001144995.1c.884_885d<br>eLAG             | DKLLAQAGSGVPHAAERLLALPLGVPA<br>VPAALLPGLPAERPGLPRT                                          | HLA-B*07:02 | VPHAAERLL  | 9  | 63.6  | 11.3808 | flameshift deletion   |
| Se115 | CCDC85C | NM_001144995.1c.884_885d<br>eLAG             | DKLLAQAGSGVPHAAERLLALPLGVPA<br>VPAALLPGLPAERPGLPRT                                          | HLA-B*07:02 | VPAALLPGL  | 9  | 84.7  | 11.3808 | flameshift deletion   |
| Se115 | CCDC85C | NM_001144995.1c.884_885d<br>eLAG             | DKLLAQAGSGVPHAAERLLALPLGVPA<br>VPAALLPGLPAERPGLPRT                                          | HLA-B*07:02 | HAAERLLAL  | 9  | 140.1 | 11.3808 | flameshift deletion   |
| Se115 | CCDC85C | NM_001144995.1c.884_885d<br>eLAG             | DKLLAQAGSGVPHAAERLLALPLGVPA<br>VPAALLPGLPAERPGLPRT                                          | HLA-B*55:02 | LPLGVPA CV | 9  | 80.3  | 11.3808 | flameshift deletion   |
| Se115 | CRNKL1  | NM_001278625.1c.125_138d<br>eITGACCTGGGGATGC | LVLAWSSQFRRRRPGRPAPQSLRRC                                                                   | HLA-B*07:02 | RGRPAPQSL  | 10 | 6.1   | 8.36229 | flameshift deletion   |
| Se115 | L3MBTL2 | NM_031488.4c.1398delG                        | GYLMICVDGGPPQMAWTGSATMPLPTSS<br>RPPSVRRMTLSSHRQKVMRHRLSTGRIT<br>WRRPSRKPLHRDSL TWIAQTMASRWA | HLA-B*55:02 | MAWTGSATM  | 9  | 480   | 3.27312 | flameshift deletion   |
| Se115 | L3MBTL2 | NM_031488.4c.1398delG                        | GYLMICVDGGPPQMAWTGSATMPLPTSS<br>RPPSVRRMTLSSHRQKVMRHRLSTGRIT<br>WRRPSRKPLHRDSL TWIAQTMASRWA | HLA-B*07:02 | RPPSVRRMTL | 10 | 7.1   | 3.27312 | flameshift deletion   |
| Se115 | L3MBTL2 | NM_031488.4c.1398delG                        | GYLMICVDGGPPQMAWTGSATMPLPTSS<br>RPPSVRRMTLSSHRQKVMRHRLSTGRIT<br>WRRPSRKPLHRDSL TWIAQTMASRWA | HLA-C*07:02 | SRPPSVRRM  | 9  | 52.6  | 3.27312 | flameshift deletion   |
| Se115 | L3MBTL2 | NM_031488.4c.1398delG                        | GYLMICVDGGPPQMAWTGSATMPLPTSS<br>RPPSVRRMTLSSHRQKVMRHRLSTGRIT<br>WRRPSRKPLHRDSL TWIAQTMASRWA | HLA-B*07:02 | MAWTGSATM  | 9  | 362   | 3.27312 | flameshift deletion   |
| Se115 | L3MBTL2 | NM_031488.4c.1398delG                        | GYLMICVDGGPPQMAWTGSATMPLPTSS<br>RPPSVRRMTLSSHRQKVMRHRLSTGRIT<br>WRRPSRKPLHRDSL TWIAQTMASRWA | HLA-B*07:02 | TPSSRPPSV  | 9  | 200.1 | 3.27312 | flameshift deletion   |
| Se115 | L3MBTL2 | NM_031488.4c.1398delG                        | GYLMICVDGGPPQMAWTGSATMPLPTSS<br>RPPSVRRMTLSSHRQKVMRHRLSTGRIT<br>WRRPSRKPLHRDSL TWIAQTMASRWA | HLA-C*07:02 | WRRPSRKPL  | 9  | 392.8 | 3.27312 | flameshift deletion   |
| Se115 | L3MBTL2 | NM_031488.4c.1398delG                        | GYLMICVDGGPPQMAWTGSATMPLPTSS<br>RPPSVRRMTLSSHRQKVMRHRLSTGRIT<br>WRRPSRKPLHRDSL TWIAQTMASRWA | HLA-B*07:02 | PPSVRRMTL  | 9  | 156.9 | 3.27312 | flameshift deletion   |
| Se115 | SEMA3B  | NM_001290061.1c.732_734d<br>eCTT             | ENPDDDKIYFFRETAVEAAPAL                                                                      | HLA-C*07:02 | IYFFRETAV  | 9  | 428.2 | 12.3211 | inflammation deletion |
| Se115 | DOCK4   | NM_014705.3c.1501_1503del<br>AAG             | RHCSTKEKGEKLFGFSFVPLMQ                                                                      | HLA-C*07:02 | FGFSFVPLM  | 9  | 415.3 | 5.82885 | inflammation deletion |
| Se115 | FBXO32  | NM_058229.3c.884_886delA<br>GA               | ILSDKGQLDWMKYFKLVRCYPR                                                                      | HLA-C*07:02 | MYFKLVRCY  | 9  | 250.1 | 41.9243 | inflammation deletion |
| Se115 | ZC3H12C | NM_033390.1c.1705_1707del<br>CAT             | QYPSMMMATKNGTPMPYEQYPK                                                                      | HLA-B*07:02 | MATKNGTPM  | 9  | 327.1 | 2.25859 | inflammation deletion |
| Se115 | MMP14   | NM_004995.3c.1288_1290del<br>TTC             | LFWMPNGKTYFRGNKYRFNEE                                                                       | HLA-C*07:02 | FRGNKYRF   | 9  | 89.1  | 80.7675 | inflammation deletion |

|       |        |                                                             |                                                                                      |             |            |    |       |         |                      |
|-------|--------|-------------------------------------------------------------|--------------------------------------------------------------------------------------|-------------|------------|----|-------|---------|----------------------|
| Se115 | MMP14  | NM_004995.3c.1288_1290delTTC                                | LFWMPNGKTYFRGNKYRFNEE                                                                | HLA-C*07:02 | TYFRGNKY   | 9  | 180.4 | 80.7675 | inframe deletion     |
| Se115 | MMP14  | NM_004995.3c.1288_1290delTTC                                | LFWMPNGKTYFRGNKYRFNEE                                                                | HLA-C*07:02 | FWMPNGKTY  | 9  | 200.9 | 80.7675 | inframe deletion     |
| Se115 | MMP14  | NM_004995.3c.1288_1290delTTC                                | LFWMPNGKTYFRGNKYRFNEE                                                                | HLA-A*24:02 | YFRGNKYRF  | 10 | 22.9  | 80.7675 | inframe deletion     |
| Se115 | MMP14  | NM_004995.3c.1288_1290delTTC                                | LFWMPNGKTYFRGNKYRFNEE                                                                | HLA-A*24:02 | FWMPNGKTYF | 10 | 63.1  | 80.7675 | inframe deletion     |
| Se116 | EGFR   | NM_201282.1c.1357delC                                       | SLNITSLGLRSSRR                                                                       | HLA-A*11:01 | SLNITSLGLR | 10 | 362.3 | 6.86523 | frameshift deletion  |
| Se116 | EGFR   | NM_005228.3c.1357delC                                       | SLNITSLGLRSSRR                                                                       | HLA-A*02:01 | SLNITSLGL  | 9  | 249.7 | 6.86523 | frameshift deletion  |
| Se116 | ITGA1  | NM_181501.1c.1652delC                                       | MSLEPIKQTCYLGSTIHAQQTKMSHAGLVLELQLLL                                                 | HLA-C*03:04 | KMSHAGLVL  | 9  | 180   | 2.25986 | frameshift deletion  |
| Se116 | ITGA1  | NM_181501.1c.1652delC                                       | MSLEPIKQTCYLGSTIHAQQTKMSHAGLVLELQLLL                                                 | HLA-C*03:04 | LVLELQLLL  | 9  | 420.2 | 2.25986 | frameshift deletion  |
| Se116 | ITGA1  | NM_181501.1c.1652delC                                       | MSLEPIKQTCYLGSTIHAQQTKMSHAGLVLELQLLL                                                 | HLA-A*11:01 | GSTIHAQQK  | 9  | 229.7 | 2.25986 | frameshift deletion  |
| Se116 | ITGA1  | NM_181501.1c.1652delC                                       | MSLEPIKQTCYLGSTIHAQQTKMSHAGLVLELQLLL                                                 | HLA-A*02:01 | KMSHAGLVL  | 9  | 217.5 | 2.25986 | frameshift deletion  |
| Se116 | ITGA1  | NM_181501.1c.1652delC                                       | MSLEPIKQTCYLGSTIHAQQTKMSHAGLVLELQLLL                                                 | HLA-A*02:01 | GLVLELQLLL | 10 | 27.3  | 2.25986 | frameshift deletion  |
| Se116 | ITGA1  | NM_181501.1c.1652delC                                       | MSLEPIKQTCYLGSTIHAQQTKMSHAGLVLELQLLL                                                 | HLA-A*11:01 | STIHAQQKTK | 10 | 68.5  | 2.25986 | frameshift deletion  |
| Se116 | ITGA1  | NM_181501.1c.1652delC                                       | MSLEPIKQTCYLGSTIHAQQTKMSHAGLVLELQLLL                                                 | HLA-C*03:04 | MSHAGLVLEL | 10 | 380.1 | 2.25986 | frameshift deletion  |
| Se116 | ITGA1  | NM_181501.1c.1652delC                                       | MSLEPIKQTCYLGSTIHAQQTKMSHAGLVLELQLLL                                                 | HLA-A*02:01 | LVLELQLLL  | 9  | 65.1  | 2.25986 | frameshift deletion  |
| Se116 | ITGA1  | NM_181501.1c.1652delC                                       | MSLEPIKQTCYLGSTIHAQQTKMSHAGLVLELQLLL                                                 | HLA-A*02:01 | GLVLELQLL  | 9  | 305.5 | 2.25986 | frameshift deletion  |
| Se116 | ZNF679 | NM_153363.2c.78_109delTCTGGAGGAGTGGCAATGCC TGGATCACGCTC     | LTFRDVIIEFSAEFI                                                                      | HLA-A*02:01 | VVIEFSAEFI | 10 | 173.5 | 2.43207 | frameshift deletion  |
| Se116 | ZNF679 | NM_153363.2c.78_109delTCTGGAGGAGTGGCAATGCC TGGATCACGCTC     | LTFRDVIIEFSAEFI                                                                      | HLA-C*03:04 | VVIEFSAEF  | 9  | 50.4  | 2.43207 | frameshift deletion  |
| Se116 | TJP2   | NM_004817.3c.2539_2540insA                                  | KLFDQANKLKKNVCTPFYSYNQPKFSQ                                                          | HLA-A*02:01 | KLFDQANKL  | 9  | 20    | 10.0317 | frameshift insertion |
| Se116 | TJP2   | NM_004817.3c.2539_2540insA                                  | KLFDQANKLKKNVCTPFYSYNQPKFSQ                                                          | HLA-A*11:01 | KLFDQANKLK | 10 | 77    | 10.0317 | frameshift insertion |
| Se116 | TJP2   | NM_004817.3c.2539_2540insA                                  | KLFDQANKLKKNVCTPFYSYNQPKFSQ                                                          | HLA-A*11:01 | KNVCTPFYSY | 10 | 370.9 | 10.0317 | frameshift insertion |
| Se117 | EXOC8  | NM_175876.4c.308_344delTTACGTTGCTGCCTGCCCGCTGCTGCCCGGAGCCGC | TEQKSSLESIPPPLEGRRESVGRGAETTSEARPAFSPPPGVPPATAPVQARKESSALSPCLRRLRWKAAGICWRRRDSTWCTMG | HLA-A*24:02 | RWKAAGICW  | 9  | 256.9 | 3.45664 | frameshift deletion  |

|       |         |                                                                                    |                                                                                                                                                                                                                                                                        |             |            |    |       |         |                       |
|-------|---------|------------------------------------------------------------------------------------|------------------------------------------------------------------------------------------------------------------------------------------------------------------------------------------------------------------------------------------------------------------------|-------------|------------|----|-------|---------|-----------------------|
| Se117 | LMF2    | NM_033200.2c.1397_1398delAG                                                        | FRRMTGLGGRPGGAGGQLRRPPLDGDV<br>HVQAWPEPAAPGCGAPPATPGLADVCS<br>PGPHTAQPVVHKPGLAPAAGQGASDPPCP<br>EPSGQVSLPQAAHLRSPALQVVLPAW<br>GAGPVVAAPVGGGVLPIRVPGPHAGDAA<br>QAVWTTGKPTSHPRQHQHPGPPPLDSL<br>SAVSPGGPRPALGAPHGRGGCQCASPAST<br>LFSPVLPAGTSQRGEAQSLPERLRSLRT<br>GHRSPQLLQ | HLA-C*15:02 | CASPASTLF  | 9  | 251.5 | 4.50961 | flameshift deletion   |
| Se117 | LMF2    | NM_033200.2c.1397_1398delAG                                                        | FRRMTGLGGRPGGAGGQLRRPPLDGDV<br>HVQAWPEPAAPGCGAPPATPGLADVCS<br>PGPHTAQPVVHKPGLAPAAGQGASDPPCP<br>EPSGQVSLPQAAHLRSPALQVVLPAW<br>GAGPVVAAPVGGGVLPIRVPGPHAGDAA<br>QAVWTTGKPTSHPRQHQHPGPPPLDSL<br>SAVSPGGPRPALGAPHGRGGCQCASPAST<br>LFSPVLPAGTSQRGEAQSLPERLRSLRT<br>GHRSPQLLQ | HLA-C*15:02 | ASTLFSPVL  | 9  | 340.1 | 4.50961 | flameshift deletion   |
| Se117 | LMF2    | NM_033200.2c.1397_1398delAG                                                        | FRRMTGLGGRPGGAGGQLRRPPLDGDV<br>HVQAWPEPAAPGCGAPPATPGLADVCS<br>PGPHTAQPVVHKPGLAPAAGQGASDPPCP<br>EPSGQVSLPQAAHLRSPALQVVLPAW<br>GAGPVVAAPVGGGVLPIRVPGPHAGDAA<br>QAVWTTGKPTSHPRQHQHPGPPPLDSL<br>SAVSPGGPRPALGAPHGRGGCQCASPAST<br>LFSPVLPAGTSQRGEAQSLPERLRSLRT<br>GHRSPQLLQ | HLA-C*15:02 | VAAPVGGGV  | 9  | 495.3 | 4.50961 | flameshift deletion   |
| Se117 | RBM15   | NM_022768.4c.21_46delCCC<br>TGTGCCGCGGAGTCC<br>AAGAT                               | MRTAGREAACGSAV                                                                                                                                                                                                                                                         | HLA-B*40:06 | REAACGSAV  | 9  | 76.5  | 5.6175  | flameshift deletion   |
| Se118 | PDGFC   | NM_016205.2c.500_512delT<br>CACAGAAGCTGT                                           | FCIHYNIVMPQ                                                                                                                                                                                                                                                            | HLA-C*03:04 | FCIHYNIVM  | 9  | 287   | 5.09692 | flameshift deletion   |
| Se118 | WNT7A   | NM_004625.3c.781_797delC<br>GGAAGCCATGGACAC                                        | TFLKIKKPLSYGPGVHREVAQLLRGGPGD<br>RQCGHPGRLQDQDGPQRL                                                                                                                                                                                                                    | HLA-A*11:01 | LSYGPVHR   | 9  | 125.3 | 3.18129 | flameshift deletion   |
| Se118 | PLEKHG4 | NM_001129727.2c.3036_307<br>7delGGCTATCAAGCAGGC<br>CTGGACAGCTGACATCTC<br>CCACCTGCT | RDTFVLQASSLWRQAVHNKEVR                                                                                                                                                                                                                                                 | HLA-A*11:01 | VLQASSLWR  | 9  | 341.2 | 6.77211 | inflammation deletion |
| Se118 | PLEKHG4 | NM_001129727.2c.3036_307<br>7delGGCTATCAAGCAGGC<br>CTGGACAGCTGACATCTC<br>CCACCTGCT | RDTFVLQASSLWRQAVHNKEVR                                                                                                                                                                                                                                                 | HLA-A*11:01 | SLWRQAVHNK | 10 | 86.9  | 6.77211 | inflammation deletion |
| Se118 | PLEKHG4 | NM_001129727.2c.3036_307<br>7delGGCTATCAAGCAGGC<br>CTGGACAGCTGACATCTC<br>CCACCTGCT | RDTFVLQASSLWRQAVHNKEVR                                                                                                                                                                                                                                                 | HLA-A*11:01 | FVLQASSLWR | 10 | 352.1 | 6.77211 | inflammation deletion |
| Se119 | MAMSTR  | NM_182574.2c.305_317delG<br>CGCGCCGCCCG                                            | TKSMILLERMRGASGRSGARTVPRVLPGR<br>ASSPRPWQPPGVRARSSPAQHLTGHLFHV<br>PRIPRGRRLQLPLRLLQLQP                                                                                                                                                                                 | HLA-B*40:02 | RLQLPLRLLL | 10 | 476.2 | 4.08375 | flameshift deletion   |
| Se119 | MAMSTR  | NM_182574.2c.305_317delG<br>CGCGCCGCCCG                                            | TKSMILLERMRGASGRSGARTVPRVLPGR<br>ASSPRPWQPPGVRARSSPAQHLTGHLFHV<br>PRIPRGRRLQLPLRLLQLQP                                                                                                                                                                                 | HLA-A*02:06 | HLTGHLFHV  | 9  | 8.1   | 4.08375 | flameshift deletion   |
| Se119 | MAMSTR  | NM_182574.2c.305_317delG<br>CGCGCCGCCCG                                            | TKSMILLERMRGASGRSGARTVPRVLPGR<br>ASSPRPWQPPGVRARSSPAQHLTGHLFHV<br>PRIPRGRRLQLPLRLLQLQP                                                                                                                                                                                 | HLA-A*02:06 | RLQLPLRLLL | 10 | 225.8 | 4.08375 | flameshift deletion   |
| Se119 | MAMSTR  | NM_182574.2c.305_317delG<br>CGCGCCGCCCG                                            | TKSMILLERMRGASGRSGARTVPRVLPGR<br>ASSPRPWQPPGVRARSSPAQHLTGHLFHV<br>PRIPRGRRLQLPLRLLQLQP                                                                                                                                                                                 | HLA-B*40:02 | LQLPLRLLL  | 9  | 362.2 | 4.08375 | flameshift deletion   |
| Se119 | MAMSTR  | NM_182574.2c.305_317delG<br>CGCGCCGCCCG                                            | TKSMILLERMRGASGRSGARTVPRVLPGR<br>ASSPRPWQPPGVRARSSPAQHLTGHLFHV<br>PRIPRGRRLQLPLRLLQLQP                                                                                                                                                                                 | HLA-B*40:02 | AQHLTGHLF  | 9  | 320.2 | 4.08375 | flameshift deletion   |
| Se119 | MAMSTR  | NM_182574.2c.305_317delG<br>CGCGCCGCCCG                                            | TKSMILLERMRGASGRSGARTVPRVLPGR<br>ASSPRPWQPPGVRARSSPAQHLTGHLFHV<br>PRIPRGRRLQLPLRLLQLQP                                                                                                                                                                                 | HLA-B*35:01 | LPLRLLQL   | 9  | 260.5 | 4.08375 | flameshift deletion   |
| Se119 | MAMSTR  | NM_182574.2c.305_317delG<br>CGCGCCGCCCG                                            | TKSMILLERMRGASGRSGARTVPRVLPGR<br>ASSPRPWQPPGVRARSSPAQHLTGHLFHV<br>PRIPRGRRLQLPLRLLQLQP                                                                                                                                                                                 | HLA-A*02:06 | QHLTGHLFHV | 10 | 134.3 | 4.08375 | flameshift deletion   |
| Se119 | MAMSTR  | NM_182574.2c.305_317delG<br>CGCGCCGCCCG                                            | TKSMILLERMRGASGRSGARTVPRVLPGR<br>ASSPRPWQPPGVRARSSPAQHLTGHLFHV<br>PRIPRGRRLQLPLRLLQLQP                                                                                                                                                                                 | HLA-A*02:06 | MILLERMRGA | 9  | 39.1  | 4.08375 | flameshift deletion   |
| Se119 | MAMSTR  | NM_182574.2c.305_317delG<br>CGCGCCGCCCG                                            | TKSMILLERMRGASGRSGARTVPRVLPGR<br>ASSPRPWQPPGVRARSSPAQHLTGHLFHV<br>PRIPRGRRLQLPLRLLQLQP                                                                                                                                                                                 | HLA-A*02:06 | LQLPLRLLL  | 9  | 67.9  | 4.08375 | flameshift deletion   |
| Se120 | INPP5A  | NM_001321042.1c.261delT                                                            | ESTPMLEKEFRRTTSPSANGQEKASSGR<br>GGALQTVPLTW                                                                                                                                                                                                                            | HLA-C*03:03 | ASSGRGGAL  | 9  | 292.6 | 4.64    | flameshift deletion   |

|       |        |                          |                                                                                                                           |             |            |    |       |         |                     |
|-------|--------|--------------------------|---------------------------------------------------------------------------------------------------------------------------|-------------|------------|----|-------|---------|---------------------|
| Se120 | LPIN1  | NM_001261427.1c.2604delC | LLKRSHSDFPVRIPSVTSPFGESHCHLLKTRTFILPQRKMSQAASCQCRAWLSPIKG                                                                 | HLA-C*03:03 | RIPSVTSPF  | 9  | 384.6 | 3.51952 | flameshift deletion |
| Se120 | LPIN1  | NM_001261428.1c.2841delC | LLKRSHSDFPVRIPSVTSPFGESHCHLLKTRTFILPQRKMSQAASCQCRAWLSPIKG                                                                 | HLA-B*35:01 | FPVRIPSVT  | 9  | 90.4  | 3.51952 | flameshift deletion |
| Se120 | LPIN1  | NM_001261428.1c.2841delC | LLKRSHSDFPVRIPSVTSPFGESHCHLLKTRTFILPQRKMSQAASCQCRAWLSPIKG                                                                 | HLA-B*35:01 | SPFGESHCH  | 9  | 290.7 | 3.51952 | flameshift deletion |
| Se120 | LPIN1  | NM_001261427.1c.2604delC | LLKRSHSDFPVRIPSVTSPFGESHCHLLKTRTFILPQRKMSQAASCQCRAWLSPIKG                                                                 | HLA-A*24:02 | RIPSVTSPF  | 9  | 302.2 | 3.51952 | flameshift deletion |
| Se120 | ZNF574 | NM_022752.5c.773delC     | PALQQEVQASSLQRCLCLSLTPCQLLTTVTSCAMVKPLGGIAGGAGPGGTTVEKQAGQPHRSSSAQPVTSSFSHPTSYSSTCGVTGRASLSAPCAVVSSLALPVWTSTLETIAAASHTSCV | HLA-C*03:03 | SAQPVTSSF  | 9  | 31.2  | 9.42623 | flameshift deletion |
| Se120 | ZNF574 | NM_022752.5c.773delC     | PALQQEVQASSLQRCLCLSLTPCQLLTTVTSCAMVKPLGGIAGGAGPGGTTVEKQAGQPHRSSSAQPVTSSFSHPTSYSSTCGVTGRASLSAPCAVVSSLALPVWTSTLETIAAASHTSCV | HLA-C*03:03 | LALPVWTSTL | 10 | 82    | 9.42623 | flameshift deletion |
| Se120 | ZNF574 | NM_022752.5c.773delC     | PALQQEVQASSLQRCLCLSLTPCQLLTTVTSCAMVKPLGGIAGGAGPGGTTVEKQAGQPHRSSSAQPVTSSFSHPTSYSSTCGVTGRASLSAPCAVVSSLALPVWTSTLETIAAASHTSCV | HLA-C*08:01 | IAASHTSCV  | 9  | 419   | 9.42623 | flameshift deletion |
| Se120 | ZNF574 | NM_022752.5c.773delC     | PALQQEVQASSLQRCLCLSLTPCQLLTTVTSCAMVKPLGGIAGGAGPGGTTVEKQAGQPHRSSSAQPVTSSFSHPTSYSSTCGVTGRASLSAPCAVVSSLALPVWTSTLETIAAASHTSCV | HLA-C*08:01 | CAVVSSLAL  | 9  | 209.1 | 9.42623 | flameshift deletion |
| Se120 | ZNF574 | NM_022752.5c.773delC     | PALQQEVQASSLQRCLCLSLTPCQLLTTVTSCAMVKPLGGIAGGAGPGGTTVEKQAGQPHRSSSAQPVTSSFSHPTSYSSTCGVTGRASLSAPCAVVSSLALPVWTSTLETIAAASHTSCV | HLA-C*03:03 | CGVTGRASL  | 9  | 483.2 | 9.42623 | flameshift deletion |
| Se120 | ZNF574 | NM_022752.5c.773delC     | PALQQEVQASSLQRCLCLSLTPCQLLTTVTSCAMVKPLGGIAGGAGPGGTTVEKQAGQPHRSSSAQPVTSSFSHPTSYSSTCGVTGRASLSAPCAVVSSLALPVWTSTLETIAAASHTSCV | HLA-C*03:03 | SSFHPTSYS  | 9  | 395.1 | 9.42623 | flameshift deletion |
| Se120 | ZNF574 | NM_022752.5c.773delC     | PALQQEVQASSLQRCLCLSLTPCQLLTTVTSCAMVKPLGGIAGGAGPGGTTVEKQAGQPHRSSSAQPVTSSFSHPTSYSSTCGVTGRASLSAPCAVVSSLALPVWTSTLETIAAASHTSCV | HLA-C*03:03 | VVSSLALPV  | 9  | 305.9 | 9.42623 | flameshift deletion |
| Se120 | ZNF574 | NM_022752.5c.773delC     | PALQQEVQASSLQRCLCLSLTPCQLLTTVTSCAMVKPLGGIAGGAGPGGTTVEKQAGQPHRSSSAQPVTSSFSHPTSYSSTCGVTGRASLSAPCAVVSSLALPVWTSTLETIAAASHTSCV | HLA-C*03:03 | TSYSTCGV   | 9  | 254.9 | 9.42623 | flameshift deletion |
| Se120 | ZNF574 | NM_022752.5c.773delC     | PALQQEVQASSLQRCLCLSLTPCQLLTTVTSCAMVKPLGGIAGGAGPGGTTVEKQAGQPHRSSSAQPVTSSFSHPTSYSSTCGVTGRASLSAPCAVVSSLALPVWTSTLETIAAASHTSCV | HLA-C*03:03 | ASLSAPCAV  | 9  | 89    | 9.42623 | flameshift deletion |
| Se120 | ZNF574 | NM_022752.5c.773delC     | PALQQEVQASSLQRCLCLSLTPCQLLTTVTSCAMVKPLGGIAGGAGPGGTTVEKQAGQPHRSSSAQPVTSSFSHPTSYSSTCGVTGRASLSAPCAVVSSLALPVWTSTLETIAAASHTSCV | HLA-C*03:03 | IAASHTSCV  | 9  | 36.6  | 9.42623 | flameshift deletion |
| Se120 | ZNF574 | NM_022752.5c.773delC     | PALQQEVQASSLQRCLCLSLTPCQLLTTVTSCAMVKPLGGIAGGAGPGGTTVEKQAGQPHRSSSAQPVTSSFSHPTSYSSTCGVTGRASLSAPCAVVSSLALPVWTSTLETIAAASHTSCV | HLA-C*03:03 | CAVVSSLAL  | 9  | 15.4  | 9.42623 | flameshift deletion |
| Se120 | ZNF574 | NM_022752.5c.773delC     | PALQQEVQASSLQRCLCLSLTPCQLLTTVTSCAMVKPLGGIAGGAGPGGTTVEKQAGQPHRSSSAQPVTSSFSHPTSYSSTCGVTGRASLSAPCAVVSSLALPVWTSTLETIAAASHTSCV | HLA-B*35:01 | QPVTSSFSH  | 9  | 343.6 | 9.42623 | flameshift deletion |
| Se120 | ZNF574 | NM_022752.5c.773delC     | PALQQEVQASSLQRCLCLSLTPCQLLTTVTSCAMVKPLGGIAGGAGPGGTTVEKQAGQPHRSSSAQPVTSSFSHPTSYSSTCGVTGRASLSAPCAVVSSLALPVWTSTLETIAAASHTSCV | HLA-B*35:01 | LPVWTSTLE  | 9  | 276.9 | 9.42623 | flameshift deletion |
| Se120 | ZNF574 | NM_022752.5c.773delC     | PALQQEVQASSLQRCLCLSLTPCQLLTTVTSCAMVKPLGGIAGGAGPGGTTVEKQAGQPHRSSSAQPVTSSFSHPTSYSSTCGVTGRASLSAPCAVVSSLALPVWTSTLETIAAASHTSCV | HLA-B*35:01 | CAVVSSLAL  | 9  | 204.4 | 9.42623 | flameshift deletion |

|       |        |                           |                                                                                                                                          |             |            |    |       |         |                      |
|-------|--------|---------------------------|------------------------------------------------------------------------------------------------------------------------------------------|-------------|------------|----|-------|---------|----------------------|
| Se120 | ZNF574 | NM_022752.5c.773delC      | PALQQEVQASSLQRCLCLSLTPCQLLTTVT<br>SCAMVKPLGGIAGGAGPGGTTVEKQAGQP<br>HRSSSAQPVTSFSHPTSYSSTCGVTGRAS<br>LSAPCAVVSSLALPVWTSTLETIAAHSHTSC<br>V | HLA-B*35:01 | LTTVTSCAM  | 9  | 86.4  | 9.42623 | flameshift deletion  |
| Se120 | ZNF574 | NM_022752.5c.773delC      | PALQQEVQASSLQRCLCLSLTPCQLLTTVT<br>SCAMVKPLGGIAGGAGPGGTTVEKQAGQP<br>HRSSSAQPVTSFSHPTSYSSTCGVTGRAS<br>LSAPCAVVSSLALPVWTSTLETIAAHSHTSC<br>V | HLA-B*35:01 | SSFHPTS    | 9  | 52.8  | 9.42623 | flameshift deletion  |
| Se120 | ZNF574 | NM_022752.5c.773delC      | PALQQEVQASSLQRCLCLSLTPCQLLTTVT<br>SCAMVKPLGGIAGGAGPGGTTVEKQAGQP<br>HRSSSAQPVTSFSHPTSYSSTCGVTGRAS<br>LSAPCAVVSSLALPVWTSTLETIAAHSHTSC<br>V | HLA-B*35:01 | SAQPVTS    | 9  | 34.1  | 9.42623 | flameshift deletion  |
| Se120 | ZNF574 | NM_022752.5c.773delC      | PALQQEVQASSLQRCLCLSLTPCQLLTTVT<br>SCAMVKPLGGIAGGAGPGGTTVEKQAGQP<br>HRSSSAQPVTSFSHPTSYSSTCGVTGRAS<br>LSAPCAVVSSLALPVWTSTLETIAAHSHTSC<br>V | HLA-A*24:02 | VWTSTLETI  | 9  | 97.5  | 9.42623 | flameshift deletion  |
| Se120 | ZNF574 | NM_022752.5c.773delC      | PALQQEVQASSLQRCLCLSLTPCQLLTTVT<br>SCAMVKPLGGIAGGAGPGGTTVEKQAGQP<br>HRSSSAQPVTSFSHPTSYSSTCGVTGRAS<br>LSAPCAVVSSLALPVWTSTLETIAAHSHTSC<br>V | HLA-C*03:03 | LTTVTSCAM  | 9  | 48.9  | 9.42623 | flameshift deletion  |
| Se121 | CYP1B1 | NM_000104.3c.984_985insAG | NVPATTDIFRAPARTPCPPRCGCGSSSSPGI<br>LMCRLECRQNWIRSWGVTCLVWVTSPT<br>CPMSWSPFMKPCASPALCLSLFLMPPLPTP<br>LSWATTFPRTLWFLSTSGL                  | HLA-A*11:01 | LSWATTFPR  | 9  | 31.8  | 59.2412 | frameshift insertion |
| Se121 | CYP1B1 | NM_000104.3c.984_985insAG | NVPATTDIFRAPARTPCPPRCGCGSSSSPGI<br>LMCRLECRQNWIRSWGVTCLVWVTSPT<br>CPMSWSPFMKPCASPALCLSLFLMPPLPTP<br>LSWATTFPRTLWFLSTSGL                  | HLA-A*11:01 | CPMSWSPFMK | 10 | 39.5  | 59.2412 | frameshift insertion |
| Se121 | CYP1B1 | NM_000104.3c.984_985insAG | NVPATTDIFRAPARTPCPPRCGCGSSSSPGI<br>LMCRLECRQNWIRSWGVTCLVWVTSPT<br>CPMSWSPFMKPCASPALCLSLFLMPPLPTP<br>LSWATTFPRTLWFLSTSGL                  | HLA-A*11:01 | PMSWSPFMK  | 9  | 98.1  | 59.2412 | frameshift insertion |
| Se121 | CYP1B1 | NM_000104.3c.984_985insAG | NVPATTDIFRAPARTPCPPRCGCGSSSSPGI<br>LMCRLECRQNWIRSWGVTCLVWVTSPT<br>CPMSWSPFMKPCASPALCLSLFLMPPLPTP<br>LSWATTFPRTLWFLSTSGL                  | HLA-A*11:01 | SSSPGILMCR | 10 | 112.8 | 59.2412 | frameshift insertion |
| Se121 | CYP1B1 | NM_000104.3c.984_985insAG | NVPATTDIFRAPARTPCPPRCGCGSSSSPGI<br>LMCRLECRQNWIRSWGVTCLVWVTSPT<br>CPMSWSPFMKPCASPALCLSLFLMPPLPTP<br>LSWATTFPRTLWFLSTSGL                  | HLA-A*11:01 | SSPGILMCR  | 9  | 309   | 59.2412 | frameshift insertion |
| Se121 | CYP1B1 | NM_000104.3c.984_985insAG | NVPATTDIFRAPARTPCPPRCGCGSSSSPGI<br>LMCRLECRQNWIRSWGVTCLVWVTSPT<br>CPMSWSPFMKPCASPALCLSLFLMPPLPTP<br>LSWATTFPRTLWFLSTSGL                  | HLA-A*11:01 | ITDIFRAPAR | 10 | 398.1 | 59.2412 | frameshift insertion |
| Se121 | CYP1B1 | NM_000104.3c.984_985insAG | NVPATTDIFRAPARTPCPPRCGCGSSSSPGI<br>LMCRLECRQNWIRSWGVTCLVWVTSPT<br>CPMSWSPFMKPCASPALCLSLFLMPPLPTP<br>LSWATTFPRTLWFLSTSGL                  | HLA-A*11:01 | PLSWATTFPR | 10 | 435.9 | 59.2412 | frameshift insertion |
| Se121 | CYP1B1 | NM_000104.3c.984_985insAG | NVPATTDIFRAPARTPCPPRCGCGSSSSPGI<br>LMCRLECRQNWIRSWGVTCLVWVTSPT<br>CPMSWSPFMKPCASPALCLSLFLMPPLPTP<br>LSWATTFPRTLWFLSTSGL                  | HLA-A*31:01 | LSWATTFPR  | 9  | 7.2   | 59.2412 | frameshift insertion |
| Se121 | CYP1B1 | NM_000104.3c.984_985insAG | NVPATTDIFRAPARTPCPPRCGCGSSSSPGI<br>LMCRLECRQNWIRSWGVTCLVWVTSPT<br>CPMSWSPFMKPCASPALCLSLFLMPPLPTP<br>LSWATTFPRTLWFLSTSGL                  | HLA-A*31:01 | PLSWATTFPR | 10 | 47    | 59.2412 | frameshift insertion |
| Se121 | CYP1B1 | NM_000104.3c.984_985insAG | NVPATTDIFRAPARTPCPPRCGCGSSSSPGI<br>LMCRLECRQNWIRSWGVTCLVWVTSPT<br>CPMSWSPFMKPCASPALCLSLFLMPPLPTP<br>LSWATTFPRTLWFLSTSGL                  | HLA-A*31:01 | ILMCRLECR  | 9  | 49.9  | 59.2412 | frameshift insertion |
| Se121 | CYP1B1 | NM_000104.3c.984_985insAG | NVPATTDIFRAPARTPCPPRCGCGSSSSPGI<br>LMCRLECRQNWIRSWGVTCLVWVTSPT<br>CPMSWSPFMKPCASPALCLSLFLMPPLPTP<br>LSWATTFPRTLWFLSTSGL                  | HLA-A*31:01 | RLECRQNWIR | 10 | 55    | 59.2412 | frameshift insertion |
| Se121 | CYP1B1 | NM_000104.3c.984_985insAG | NVPATTDIFRAPARTPCPPRCGCGSSSSPGI<br>LMCRLECRQNWIRSWGVTCLVWVTSPT<br>CPMSWSPFMKPCASPALCLSLFLMPPLPTP<br>LSWATTFPRTLWFLSTSGL                  | HLA-A*31:01 | ITDIFRAPAR | 10 | 74.6  | 59.2412 | frameshift insertion |
| Se121 | CYP1B1 | NM_000104.3c.984_985insAG | NVPATTDIFRAPARTPCPPRCGCGSSSSPGI<br>LMCRLECRQNWIRSWGVTCLVWVTSPT<br>CPMSWSPFMKPCASPALCLSLFLMPPLPTP<br>LSWATTFPRTLWFLSTSGL                  | HLA-A*31:01 | GILMCRLECR | 10 | 117.9 | 59.2412 | frameshift insertion |
| Se121 | CYP1B1 | NM_000104.3c.984_985insAG | NVPATTDIFRAPARTPCPPRCGCGSSSSPGI<br>LMCRLECRQNWIRSWGVTCLVWVTSPT<br>CPMSWSPFMKPCASPALCLSLFLMPPLPTP<br>LSWATTFPRTLWFLSTSGL                  | HLA-A*31:01 | SSSPGILMCR | 10 | 127.7 | 59.2412 | frameshift insertion |
| Se121 | CYP1B1 | NM_000104.3c.984_985insAG | NVPATTDIFRAPARTPCPPRCGCGSSSSPGI<br>LMCRLECRQNWIRSWGVTCLVWVTSPT<br>CPMSWSPFMKPCASPALCLSLFLMPPLPTP<br>LSWATTFPRTLWFLSTSGL                  | HLA-A*31:01 | LSWATTFPRT | 10 | 139   | 59.2412 | frameshift insertion |
| Se121 | CYP1B1 | NM_000104.3c.984_985insAG | NVPATTDIFRAPARTPCPPRCGCGSSSSPGI<br>LMCRLECRQNWIRSWGVTCLVWVTSPT<br>CPMSWSPFMKPCASPALCLSLFLMPPLPTP<br>LSWATTFPRTLWFLSTSGL                  | HLA-A*31:01 | APARTPCPPR | 10 | 157.8 | 59.2412 | frameshift insertion |

|       |         |                            |                                                                                                                        |             |            |    |       |         |                      |
|-------|---------|----------------------------|------------------------------------------------------------------------------------------------------------------------|-------------|------------|----|-------|---------|----------------------|
| Se121 | CYP1B1  | NM_000104.3c.984_985insAG  | NVPATTTDFRAPARTPCPPRCSSGSSSPGI<br>LMCRLECRQNWIRSWGVTCLVWVTSPT<br>CPMSWPSFMKPCASPALCLSLFLMPPLPTP<br>LSWATTFPRTLWFLSTSGL | HLA-A*31:01 | SSPGILMCR  | 9  | 206.8 | 59.2412 | frameshift insertion |
| Se121 | CYP1B1  | NM_000104.3c.984_985insAG  | NVPATTTDFRAPARTPCPPRCSSGSSSPGI<br>LMCRLECRQNWIRSWGVTCLVWVTSPT<br>CPMSWPSFMKPCASPALCLSLFLMPPLPTP<br>LSWATTFPRTLWFLSTSGL | HLA-B*15:01 | FMKPCASPAL | 10 | 44    | 59.2412 | frameshift insertion |
| Se121 | CYP1B1  | NM_000104.3c.984_985insAG  | NVPATTTDFRAPARTPCPPRCSSGSSSPGI<br>LMCRLECRQNWIRSWGVTCLVWVTSPT<br>CPMSWPSFMKPCASPALCLSLFLMPPLPTP<br>LSWATTFPRTLWFLSTSGL | HLA-B*15:01 | FLMPPLPTPL | 10 | 137.2 | 59.2412 | frameshift insertion |
| Se121 | CYP1B1  | NM_000104.3c.984_985insAG  | NVPATTTDFRAPARTPCPPRCSSGSSSPGI<br>LMCRLECRQNWIRSWGVTCLVWVTSPT<br>CPMSWPSFMKPCASPALCLSLFLMPPLPTP<br>LSWATTFPRTLWFLSTSGL | HLA-B*15:01 | FMKPCASPA  | 9  | 160.9 | 59.2412 | frameshift insertion |
| Se121 | CYP1B1  | NM_000104.3c.984_985insAG  | NVPATTTDFRAPARTPCPPRCSSGSSSPGI<br>LMCRLECRQNWIRSWGVTCLVWVTSPT<br>CPMSWPSFMKPCASPALCLSLFLMPPLPTP<br>LSWATTFPRTLWFLSTSGL | HLA-B*15:01 | WVTSPTCPM  | 9  | 230.1 | 59.2412 | frameshift insertion |
| Se121 | CYP1B1  | NM_000104.3c.984_985insAG  | NVPATTTDFRAPARTPCPPRCSSGSSSPGI<br>LMCRLECRQNWIRSWGVTCLVWVTSPT<br>CPMSWPSFMKPCASPALCLSLFLMPPLPTP<br>LSWATTFPRTLWFLSTSGL | HLA-B*15:01 | LMPPLPTPL  | 9  | 355.9 | 59.2412 | frameshift insertion |
| Se121 | CYP1B1  | NM_000104.3c.984_985insAG  | NVPATTTDFRAPARTPCPPRCSSGSSSPGI<br>LMCRLECRQNWIRSWGVTCLVWVTSPT<br>CPMSWPSFMKPCASPALCLSLFLMPPLPTP<br>LSWATTFPRTLWFLSTSGL | HLA-B*15:01 | TTFPRTLWF  | 9  | 403.5 | 59.2412 | frameshift insertion |
| Se121 | CYP1B1  | NM_000104.3c.984_985insAG  | NVPATTTDFRAPARTPCPPRCSSGSSSPGI<br>LMCRLECRQNWIRSWGVTCLVWVTSPT<br>CPMSWPSFMKPCASPALCLSLFLMPPLPTP<br>LSWATTFPRTLWFLSTSGL | HLA-B*15:01 | ASPALCLSLF | 10 | 412.3 | 59.2412 | frameshift insertion |
| Se121 | CYP1B1  | NM_000104.3c.984_985insAG  | NVPATTTDFRAPARTPCPPRCSSGSSSPGI<br>LMCRLECRQNWIRSWGVTCLVWVTSPT<br>CPMSWPSFMKPCASPALCLSLFLMPPLPTP<br>LSWATTFPRTLWFLSTSGL | HLA-C*03:04 | WVTSPTCPM  | 9  | 13.6  | 59.2412 | frameshift insertion |
| Se121 | CYP1B1  | NM_000104.3c.984_985insAG  | NVPATTTDFRAPARTPCPPRCSSGSSSPGI<br>LMCRLECRQNWIRSWGVTCLVWVTSPT<br>CPMSWPSFMKPCASPALCLSLFLMPPLPTP<br>LSWATTFPRTLWFLSTSGL | HLA-C*03:04 | WATTFPRTL  | 9  | 15    | 59.2412 | frameshift insertion |
| Se121 | CYP1B1  | NM_000104.3c.984_985insAG  | NVPATTTDFRAPARTPCPPRCSSGSSSPGI<br>LMCRLECRQNWIRSWGVTCLVWVTSPT<br>CPMSWPSFMKPCASPALCLSLFLMPPLPTP<br>LSWATTFPRTLWFLSTSGL | HLA-C*03:04 | FLMPPLPTPL | 10 | 35.5  | 59.2412 | frameshift insertion |
| Se121 | CYP1B1  | NM_000104.3c.984_985insAG  | NVPATTTDFRAPARTPCPPRCSSGSSSPGI<br>LMCRLECRQNWIRSWGVTCLVWVTSPT<br>CPMSWPSFMKPCASPALCLSLFLMPPLPTP<br>LSWATTFPRTLWFLSTSGL | HLA-C*03:04 | LMPPLPTPL  | 9  | 66    | 59.2412 | frameshift insertion |
| Se121 | CYP1B1  | NM_000104.3c.984_985insAG  | NVPATTTDFRAPARTPCPPRCSSGSSSPGI<br>LMCRLECRQNWIRSWGVTCLVWVTSPT<br>CPMSWPSFMKPCASPALCLSLFLMPPLPTP<br>LSWATTFPRTLWFLSTSGL | HLA-C*03:04 | LSLFLMPPL  | 9  | 73.5  | 59.2412 | frameshift insertion |
| Se121 | CYP1B1  | NM_000104.3c.984_985insAG  | NVPATTTDFRAPARTPCPPRCSSGSSSPGI<br>LMCRLECRQNWIRSWGVTCLVWVTSPT<br>CPMSWPSFMKPCASPALCLSLFLMPPLPTP<br>LSWATTFPRTLWFLSTSGL | HLA-C*03:04 | RSWGGTVCL  | 9  | 132.6 | 59.2412 | frameshift insertion |
| Se121 | CYP1B1  | NM_000104.3c.984_985insAG  | NVPATTTDFRAPARTPCPPRCSSGSSSPGI<br>LMCRLECRQNWIRSWGVTCLVWVTSPT<br>CPMSWPSFMKPCASPALCLSLFLMPPLPTP<br>LSWATTFPRTLWFLSTSGL | HLA-C*03:04 | SSSPGILM   | 9  | 133.4 | 59.2412 | frameshift insertion |
| Se121 | CYP1B1  | NM_000104.3c.984_985insAG  | NVPATTTDFRAPARTPCPPRCSSGSSSPGI<br>LMCRLECRQNWIRSWGVTCLVWVTSPT<br>CPMSWPSFMKPCASPALCLSLFLMPPLPTP<br>LSWATTFPRTLWFLSTSGL | HLA-C*03:04 | CPMSWPSFM  | 9  | 241.3 | 59.2412 | frameshift insertion |
| Se121 | CYP1B1  | NM_000104.3c.984_985insAG  | NVPATTTDFRAPARTPCPPRCSSGSSSPGI<br>LMCRLECRQNWIRSWGVTCLVWVTSPT<br>CPMSWPSFMKPCASPALCLSLFLMPPLPTP<br>LSWATTFPRTLWFLSTSGL | HLA-C*03:04 | FMKPCASPAL | 10 | 347.5 | 59.2412 | frameshift insertion |
| Se121 | CYP1B1  | NM_000104.3c.984_985insAG  | NVPATTTDFRAPARTPCPPRCSSGSSSPGI<br>LMCRLECRQNWIRSWGVTCLVWVTSPT<br>CPMSWPSFMKPCASPALCLSLFLMPPLPTP<br>LSWATTFPRTLWFLSTSGL | HLA-C*03:04 | TTFPRTLWF  | 9  | 378.6 | 59.2412 | frameshift insertion |
| Se121 | CYP1B1  | NM_000104.3c.984_985insAG  | NVPATTTDFRAPARTPCPPRCSSGSSSPGI<br>LMCRLECRQNWIRSWGVTCLVWVTSPT<br>CPMSWPSFMKPCASPALCLSLFLMPPLPTP<br>LSWATTFPRTLWFLSTSGL | HLA-C*03:04 | CSSSPGIL   | 9  | 466.7 | 59.2412 | frameshift insertion |
| Se121 | ZFYVE19 | NM_001077268.1c.113_114ins | RGGTVPVGVWGRAGQGREGKGGAGVRV<br>QGAQDLAGVISALQTLRCWEPWVRVWVAT<br>AALSSSPSSRRSTAVRIVAGPSVQAA                             | HLA-A*11:01 | VISALQTLR  | 9  | 220.6 | 20.3566 | frameshift insertion |
| Se121 | ZFYVE19 | NM_001077268.1c.113_114ins | RGGTVPVGVWGRAGQGREGKGGAGVRV<br>QGAQDLAGVISALQTLRCWEPWVRVWVAT<br>AALSSSPSSRRSTAVRIVAGPSVQAA                             | HLA-A*11:01 | GVISALQTLR | 10 | 244.6 | 20.3566 | frameshift insertion |
| Se121 | ZFYVE19 | NM_001077268.1c.113_114ins | RGGTVPVGVWGRAGQGREGKGGAGVRV<br>QGAQDLAGVISALQTLRCWEPWVRVWVAT<br>AALSSSPSSRRSTAVRIVAGPSVQAA                             | HLA-A*11:01 | GTVPVGVWGR | 10 | 282.8 | 20.3566 | frameshift insertion |
| Se121 | ZFYVE19 | NM_001077268.1c.113_114ins | RGGTVPVGVWGRAGQGREGKGGAGVRV<br>QGAQDLAGVISALQTLRCWEPWVRVWVAT<br>AALSSSPSSRRSTAVRIVAGPSVQAA                             | HLA-A*11:01 | LSSSPSSRR  | 9  | 396.4 | 20.3566 | frameshift insertion |

|       |         |                                                 |                                                                                            |             |            |    |       |         |                      |
|-------|---------|-------------------------------------------------|--------------------------------------------------------------------------------------------|-------------|------------|----|-------|---------|----------------------|
| Se121 | ZFYVE19 | NM_001077268.1c.113_114ins                      | RGGTVPVGVWGRAGQGREGKGGAGVRV<br>QGAQDLAGVISALQTLRCWEPPWRVGGAT<br>AALSSSPSSRRSTAVRIVAGPSVQAA | HLA-A*11:01 | ALSSSPSSRR | 10 | 422.7 | 20.3566 | frameshift insertion |
| Se121 | ZFYVE19 | NM_001077268.1c.113_114ins                      | RGGTVPVGVWGRAGQGREGKGGAGVRV<br>QGAQDLAGVISALQTLRCWEPPWRVGGAT<br>AALSSSPSSRRSTAVRIVAGPSVQAA | HLA-A*31:01 | VISALQTLR  | 9  | 44.6  | 20.3566 | frameshift insertion |
| Se121 | ZFYVE19 | NM_001077268.1c.113_114ins                      | RGGTVPVGVWGRAGQGREGKGGAGVRV<br>QGAQDLAGVISALQTLRCWEPPWRVGGAT<br>AALSSSPSSRRSTAVRIVAGPSVQAA | HLA-A*31:01 | SSRRSTAVR  | 9  | 45.7  | 20.3566 | frameshift insertion |
| Se121 | ZFYVE19 | NM_001077268.1c.113_114ins                      | RGGTVPVGVWGRAGQGREGKGGAGVRV<br>QGAQDLAGVISALQTLRCWEPPWRVGGAT<br>AALSSSPSSRRSTAVRIVAGPSVQAA | HLA-A*31:01 | GTVPVGVWGR | 10 | 90.1  | 20.3566 | frameshift insertion |
| Se121 | ZFYVE19 | NM_001077268.1c.113_114ins                      | RGGTVPVGVWGRAGQGREGKGGAGVRV<br>QGAQDLAGVISALQTLRCWEPPWRVGGAT<br>AALSSSPSSRRSTAVRIVAGPSVQAA | HLA-A*31:01 | TLRCWEPPWR | 10 | 106.8 | 20.3566 | frameshift insertion |
| Se121 | ZFYVE19 | NM_001077268.1c.113_114ins                      | RGGTVPVGVWGRAGQGREGKGGAGVRV<br>QGAQDLAGVISALQTLRCWEPPWRVGGAT<br>AALSSSPSSRRSTAVRIVAGPSVQAA | HLA-A*31:01 | LSSSPSSRR  | 9  | 139.3 | 20.3566 | frameshift insertion |
| Se121 | ZFYVE19 | NM_001077268.1c.113_114ins                      | RGGTVPVGVWGRAGQGREGKGGAGVRV<br>QGAQDLAGVISALQTLRCWEPPWRVGGAT<br>AALSSSPSSRRSTAVRIVAGPSVQAA | HLA-A*31:01 | GVISALQTLR | 10 | 185   | 20.3566 | frameshift insertion |
| Se121 | ZFYVE19 | NM_001077268.1c.113_114ins                      | RGGTVPVGVWGRAGQGREGKGGAGVRV<br>QGAQDLAGVISALQTLRCWEPPWRVGGAT<br>AALSSSPSSRRSTAVRIVAGPSVQAA | HLA-A*31:01 | ALSSSPSSR  | 9  | 216.5 | 20.3566 | frameshift insertion |
| Se121 | ZFYVE19 | NM_001077268.1c.113_114ins                      | RGGTVPVGVWGRAGQGREGKGGAGVRV<br>QGAQDLAGVISALQTLRCWEPPWRVGGAT<br>AALSSSPSSRRSTAVRIVAGPSVQAA | HLA-A*31:01 | GVWGRAGQGR | 10 | 323.7 | 20.3566 | frameshift insertion |
| Se121 | ZFYVE19 | NM_001077268.1c.113_114ins                      | RGGTVPVGVWGRAGQGREGKGGAGVRV<br>QGAQDLAGVISALQTLRCWEPPWRVGGAT<br>AALSSSPSSRRSTAVRIVAGPSVQAA | HLA-A*31:01 | TVPVGVWGR  | 9  | 417.6 | 20.3566 | frameshift insertion |
| Se121 | ZFYVE19 | NM_001077268.1c.113_114ins                      | RGGTVPVGVWGRAGQGREGKGGAGVRV<br>QGAQDLAGVISALQTLRCWEPPWRVGGAT<br>AALSSSPSSRRSTAVRIVAGPSVQAA | HLA-A*31:01 | AALSSSPSSR | 10 | 428.5 | 20.3566 | frameshift insertion |
| Se121 | ZFYVE19 | NM_001077268.1c.113_114ins                      | RGGTVPVGVWGRAGQGREGKGGAGVRV<br>QGAQDLAGVISALQTLRCWEPPWRVGGAT<br>AALSSSPSSRRSTAVRIVAGPSVQAA | HLA-B*40:02 | REGKGGAGV  | 9  | 148.5 | 20.3566 | frameshift insertion |
| Se121 | ZFYVE19 | NM_001077268.1c.113_114ins                      | RGGTVPVGVWGRAGQGREGKGGAGVRV<br>QGAQDLAGVISALQTLRCWEPPWRVGGAT<br>AALSSSPSSRRSTAVRIVAGPSVQAA | HLA-C*03:04 | GVISALQTL  | 9  | 124.4 | 20.3566 | frameshift insertion |
| Se121 | ZFYVE19 | NM_001077268.1c.113_114ins                      | RGGTVPVGVWGRAGQGREGKGGAGVRV<br>QGAQDLAGVISALQTLRCWEPPWRVGGAT<br>AALSSSPSSRRSTAVRIVAGPSVQAA | HLA-C*03:04 | WRVGATAAL  | 9  | 349.7 | 20.3566 | frameshift insertion |
| Se122 | ATM     | NM_000051.3c.4373_4390del<br>GAGGAGCTTGGGCCTTTG | SLLKDIKSGLVLRDVIYTLIH                                                                      | HLA-A*02:06 | VLRDVIYTL  | 9  | 78.6  | 5.67494 | inframe deletion     |
| Se122 | ATM     | NM_000051.3c.4373_4390del<br>GAGGAGCTTGGGCCTTTG | SLLKDIKSGLVLRDVIYTLIH                                                                      | HLA-A*02:06 | LVLRDVIYT  | 9  | 410   | 5.67494 | inframe deletion     |
| Se122 | ATM     | NM_000051.3c.4373_4390del<br>GAGGAGCTTGGGCCTTTG | SLLKDIKSGLVLRDVIYTLIH                                                                      | HLA-A*02:13 | VLRDVIYTL  | 9  | 43.1  | 5.67494 | inframe deletion     |
| Se122 | ATM     | NM_000051.3c.4373_4390del<br>GAGGAGCTTGGGCCTTTG | SLLKDIKSGLVLRDVIYTLIH                                                                      | HLA-A*02:13 | LLKDIKSGL  | 9  | 475.9 | 5.67494 | inframe deletion     |
| Se122 | ATM     | NM_000051.3c.4373_4390del<br>GAGGAGCTTGGGCCTTTG | SLLKDIKSGLVLRDVIYTLIH                                                                      | HLA-A*02:06 | LVLRDVIYTL | 10 | 86.7  | 5.67494 | inframe deletion     |
| Se122 | ATM     | NM_000051.3c.4373_4390del<br>GAGGAGCTTGGGCCTTTG | SLLKDIKSGLVLRDVIYTLIH                                                                      | HLA-A*02:13 | LLLKDIKSGL | 10 | 229.2 | 5.67494 | inframe deletion     |
| Se122 | ATM     | NM_000051.3c.4373_4390del<br>GAGGAGCTTGGGCCTTTG | SLLKDIKSGLVLRDVIYTLIH                                                                      | HLA-A*02:13 | LLKDIKSGLV | 10 | 259.1 | 5.67494 | inframe deletion     |
| Se122 | ATM     | NM_000051.3c.4373_4390del<br>GAGGAGCTTGGGCCTTTG | SLLKDIKSGLVLRDVIYTLIH                                                                      | HLA-A*02:13 | VLRDVIYTLI | 10 | 332.8 | 5.67494 | inframe deletion     |
| Se122 | ATM     | NM_000051.3c.4373_4390del<br>GAGGAGCTTGGGCCTTTG | SLLKDIKSGLVLRDVIYTLIH                                                                      | HLA-A*02:13 | LVLRDVIYTL | 10 | 414.5 | 5.67494 | inframe deletion     |



|       |          |                                                                    |                                                                                |             |            |    |       |         |                     |
|-------|----------|--------------------------------------------------------------------|--------------------------------------------------------------------------------|-------------|------------|----|-------|---------|---------------------|
| Se123 | ADAMTSL4 | NM_001288607.1c.1343delG                                           | GSQRCELNCRPLASASMSVTLKRSRMGPCVSLEPLTSVWLDVA                                    | HLA-C*03:04 | LASASMSVTL | 10 | 167   | 2.82634 | flameshift deletion |
| Se123 | ADAMTSL4 | NM_019032.5c.1274delG                                              | GSQRCELNCRPLASASMSVTLKRSRMGPCVSLEPLTSVWLDVA                                    | HLA-B*40:02 | CELNCRPLA  | 9  | 165.4 | 2.82634 | flameshift deletion |
| Se123 | ADAMTSL4 | NM_001288608.1c.1343delG                                           | GSQRCELNCRPLASASMSVTLKRSRMGPCVSLEPLTSVWLDVA                                    | HLA-B*40:02 | RCELNCRPLA | 10 | 285.7 | 2.82634 | flameshift deletion |
| Se123 | ADAMTSL4 | NM_001288608.1c.1343delG                                           | GSQRCELNCRPLASASMSVTLKRSRMGPCVSLEPLTSVWLDVA                                    | HLA-C*03:04 | VSLEPLTSV  | 9  | 91.9  | 2.82634 | flameshift deletion |
| Se123 | ADAMTSL4 | NM_001288608.1c.1343delG                                           | GSQRCELNCRPLASASMSVTLKRSRMGPCVSLEPLTSVWLDVA                                    | HLA-C*03:04 | ASASMSVTL  | 9  | 38.9  | 2.82634 | flameshift deletion |
| Se123 | SYK      | NM_003177.6c.905delG                                               | SRIKSYSPKRPATESPPLPKGTGKRVLCHSIRMSQNLHPGLQTKAPREKPYWTRQCTRAPTRTPRRSGPRRFTWTESC | HLA-C*03:04 | HSIRMSQNL  | 9  | 158.7 | 11.8855 | flameshift deletion |
| Se123 | SYK      | NM_001174167.2c.905delG                                            | SRIKSYSPKRPATESPPLPKGTGKRVLCHSIRMSQNLHPGLQTKAPREKPYWTRQCTRAPTRTPRRSGPRRFTWTESC | HLA-C*03:04 | RVLCHSIRM  | 9  | 372.3 | 11.8855 | flameshift deletion |
| Se123 | SYK      | NM_001174167.2c.905delG                                            | SRIKSYSPKRPATESPPLPKGTGKRVLCHSIRMSQNLHPGLQTKAPREKPYWTRQCTRAPTRTPRRSGPRRFTWTESC | HLA-C*03:04 | MSQNLHPGL  | 9  | 307.2 | 11.8855 | flameshift deletion |
| Se123 | COL6A6   | NM_001102608.1c.1184_1192delACCTGGCTG                              | EQYVSKLKTFAAHNQTFLLKCLR                                                        | HLA-A*24:02 | QYVSKLKT   | 9  | 70.7  | 7.0894  | inframe deletion    |
| Se123 | COL6A6   | NM_001102608.1c.1184_1192delACCTGGCTG                              | EQYVSKLKTFAAHNQTFLLKCLR                                                        | HLA-A*24:02 | TFAAHNQTF  | 9  | 81.5  | 7.0894  | inframe deletion    |
| Se123 | COL6A6   | NM_001102608.1c.1184_1192delACCTGGCTG                              | EQYVSKLKTFAAHNQTFLLKCLR                                                        | HLA-C*03:04 | FAAHNQTF   | 9  | 3.3   | 7.0894  | inframe deletion    |
| Se123 | COL6A6   | NM_001102608.1c.1184_1192delACCTGGCTG                              | EQYVSKLKTFAAHNQTFLLKCLR                                                        | HLA-A*24:02 | KTFAAHNQTF | 10 | 207.2 | 7.0894  | inframe deletion    |
| Se123 | COL6A6   | NM_001102608.1c.1184_1192delACCTGGCTG                              | EQYVSKLKTFAAHNQTFLLKCLR                                                        | HLA-C*03:04 | TFAAHNQTF  | 10 | 327.6 | 7.0894  | inframe deletion    |
| Se124 | NLRP7    | NM_001127255.1c.864_901delGAGGAAGATGTTACCCA GGGCAGCCTTGCTGGTCA CCA | KPVPVLLGSLNAAQTEGPPAPGAAADLRKGGGLPGGGQEGLPETLWRRGPHACL                         | HLA-B*40:02 | QEGLPETL   | 9  | 71.9  | 1.05995 | flameshift deletion |
| Se124 | NLRP7    | NM_001127255.1c.864_901delGAGGAAGATGTTACCCA GGGCAGCCTTGCTGGTCA CCA | KPVPVLLGSLNAAQTEGPPAPGAAADLRKGGGLPGGGQEGLPETLWRRGPHACL                         | HLA-B*40:02 | GQEGLPETL  | 10 | 314.9 | 1.05995 | flameshift deletion |
| Se125 | CTSA     | NM_000308.3c.108_110delGCT                                         | PLFLLLLLLLLVSWASRGEAAP                                                         | HLA-A*02:01 | FLLLLLLLL  | 9  | 94.6  | 42.0562 | inframe deletion    |
| Se125 | CTSA     | NM_000308.3c.108_110delGCT                                         | PLFLLLLLLLLVSWASRGEAAP                                                         | HLA-A*02:01 | LLLLLVSWA  | 9  | 167   | 42.0562 | inframe deletion    |
| Se125 | CTSA     | NM_000308.3c.108_110delGCT                                         | PLFLLLLLLLLVSWASRGEAAP                                                         | HLA-A*02:01 | LLLLLLLLLV | 9  | 183.3 | 42.0562 | inframe deletion    |
| Se125 | CTSA     | NM_000308.3c.108_110delGCT                                         | PLFLLLLLLLLVSWASRGEAAP                                                         | HLA-A*02:01 | LLLLVSWAS  | 9  | 452.3 | 42.0562 | inframe deletion    |
| Se125 | CTSA     | NM_000308.3c.108_110delGCT                                         | PLFLLLLLLLLVSWASRGEAAP                                                         | HLA-A*02:01 | FLLLLLLLL  | 10 | 289.8 | 42.0562 | inframe deletion    |
| Se125 | CTSA     | NM_000308.3c.108_110delGCT                                         | PLFLLLLLLLLVSWASRGEAAP                                                         | HLA-A*02:01 | LLLLLVSWA  | 10 | 473.1 | 42.0562 | inframe deletion    |
| Se126 | BORA     | NM_024808.3c.374delT                                               | GKFRWSIDQLAE                                                                   | HLA-C*14:02 | KFRWSIDQL  | 9  | 91.3  | 4.56069 | flameshift deletion |
| Se126 | SYNGAP1  | NM_006772.2c.2037_2054delTGAGGGTTACATCGACTT                        | SNLDLTLNSSLGRELSTLHAL                                                          | HLA-A*31:01 | LTNSSLGR   | 9  | 122.6 | 7.05474 | inframe deletion    |

|       |         |                                                            |                                                                                                                          |             |            |    |       |         |                     |
|-------|---------|------------------------------------------------------------|--------------------------------------------------------------------------------------------------------------------------|-------------|------------|----|-------|---------|---------------------|
| Se127 | ATP13A2 | NM_022089.3c.3071_3076del<br>TGGCCC                        | TGVQLGGYFLTQPWFVPLNRTV                                                                                                   | HLA-C*08:01 | LTQPWFVPL  | 9  | 287.5 | 11.4509 | inframe deletion    |
| Se127 | ATP13A2 | NM_022089.3c.3071_3076del<br>TGGCCC                        | TGVQLGGYFLTQPWFVPLNRTV                                                                                                   | HLA-A*02:07 | FLTQPWFVPL | 10 | 344.3 | 11.4509 | inframe deletion    |
| Se128 | SIPA1   | NM_006747.3c.2697_2721del<br>GGCCTCCTTTCTGCCACG<br>TACCTTG | SEDKGNPAPELSCGTPSAGSCRRAVGP<br>WRTSGRPSRRLPLLATPFWSRCPERDPSQ<br>RVETLRELQNLMLSQLGTSSRRSLTWSP<br>CSGSCRTRRRRRRTGRPWRRRCGA | HLA-B*58:01 | LPLLATPFW  | 9  | 187.2 | 18.3759 | flameshift deletion |
| Se128 | SIPA1   | NM_006747.3c.2697_2721del<br>GGCCTCCTTTCTGCCACG<br>TACCTTG | SEDKGNPAPELSCGTPSAGSCRRAVGP<br>WRTSGRPSRRLPLLATPFWSRCPERDPSQ<br>RVETLRELQNLMLSQLGTSSRRSLTWSP<br>CSGSCRTRRRRRRTGRPWRRRCGA | HLA-B*58:01 | RLPLLATPFW | 10 | 73    | 18.3759 | flameshift deletion |
| Se128 | SIPA1   | NM_006747.3c.2697_2721del<br>GGCCTCCTTTCTGCCACG<br>TACCTTG | SEDKGNPAPELSCGTPSAGSCRRAVGP<br>WRTSGRPSRRLPLLATPFWSRCPERDPSQ<br>RVETLRELQNLMLSQLGTSSRRSLTWSP<br>CSGSCRTRRRRRRTGRPWRRRCGA | HLA-B*58:01 | GTSQRRLTW  | 10 | 62.9  | 18.3759 | flameshift deletion |
| Se128 | SIPA1   | NM_153253.29c.2697_2721d<br>eGGCCTCCTTTCTGCCAC<br>GTACCTTG | SEDKGNPAPELSCGTPSAGSCRRAVGP<br>WRTSGRPSRRLPLLATPFWSRCPERDPSQ<br>RVETLRELQNLMLSQLGTSSRRSLTWSP<br>CSGSCRTRRRRRRTGRPWRRRCGA | HLA-A*33:03 | LLATPFWSR  | 9  | 44.4  | 18.3759 | flameshift deletion |
| Se128 | SIPA1   | NM_153253.29c.2697_2721d<br>eGGCCTCCTTTCTGCCAC<br>GTACCTTG | SEDKGNPAPELSCGTPSAGSCRRAVGP<br>WRTSGRPSRRLPLLATPFWSRCPERDPSQ<br>RVETLRELQNLMLSQLGTSSRRSLTWSP<br>CSGSCRTRRRRRRTGRPWRRRCGA | HLA-A*33:03 | PFWSRCPER  | 9  | 318.2 | 18.3759 | flameshift deletion |
| Se128 | SIPA1   | NM_153253.29c.2697_2721d<br>eGGCCTCCTTTCTGCCAC<br>GTACCTTG | SEDKGNPAPELSCGTPSAGSCRRAVGP<br>WRTSGRPSRRLPLLATPFWSRCPERDPSQ<br>RVETLRELQNLMLSQLGTSSRRSLTWSP<br>CSGSCRTRRRRRRTGRPWRRRCGA | HLA-A*33:03 | RTSGRPSRR  | 9  | 450.6 | 18.3759 | flameshift deletion |
| Se128 | SIPA1   | NM_153253.29c.2697_2721d<br>eGGCCTCCTTTCTGCCAC<br>GTACCTTG | SEDKGNPAPELSCGTPSAGSCRRAVGP<br>WRTSGRPSRRLPLLATPFWSRCPERDPSQ<br>RVETLRELQNLMLSQLGTSSRRSLTWSP<br>CSGSCRTRRRRRRTGRPWRRRCGA | HLA-B*15:01 | RLPLLATPF  | 9  | 69    | 18.3759 | flameshift deletion |
| Se128 | SIPA1   | NM_153253.29c.2697_2721d<br>eGGCCTCCTTTCTGCCAC<br>GTACCTTG | SEDKGNPAPELSCGTPSAGSCRRAVGP<br>WRTSGRPSRRLPLLATPFWSRCPERDPSQ<br>RVETLRELQNLMLSQLGTSSRRSLTWSP<br>CSGSCRTRRRRRRTGRPWRRRCGA | HLA-A*33:03 | AVGPWRTSGR | 10 | 366.5 | 18.3759 | flameshift deletion |
| Se128 | SIPA1   | NM_006747.3c.2697_2721del<br>GGCCTCCTTTCTGCCACG<br>TACCTTG | SEDKGNPAPELSCGTPSAGSCRRAVGP<br>WRTSGRPSRRLPLLATPFWSRCPERDPSQ<br>RVETLRELQNLMLSQLGTSSRRSLTWSP<br>CSGSCRTRRRRRRTGRPWRRRCGA | HLA-B*58:01 | TSQRRLTW   | 9  | 27    | 18.3759 | flameshift deletion |
| Se128 | SIPA1   | NM_006747.3c.2697_2721del<br>GGCCTCCTTTCTGCCACG<br>TACCTTG | SEDKGNPAPELSCGTPSAGSCRRAVGP<br>WRTSGRPSRRLPLLATPFWSRCPERDPSQ<br>RVETLRELQNLMLSQLGTSSRRSLTWSP<br>CSGSCRTRRRRRRTGRPWRRRCGA | HLA-A*33:03 | TPFWSRCPER | 10 | 46.2  | 18.3759 | flameshift deletion |
| Se128 | SIPA1   | NM_006747.3c.2697_2721del<br>GGCCTCCTTTCTGCCACG<br>TACCTTG | SEDKGNPAPELSCGTPSAGSCRRAVGP<br>WRTSGRPSRRLPLLATPFWSRCPERDPSQ<br>RVETLRELQNLMLSQLGTSSRRSLTWSP<br>CSGSCRTRRRRRRTGRPWRRRCGA | HLA-B*15:01 | SQRVETLREL | 10 | 349.2 | 18.3759 | flameshift deletion |
| Se128 | SIPA1   | NM_153253.29c.2697_2721d<br>eGGCCTCCTTTCTGCCAC<br>GTACCTTG | SEDKGNPAPELSCGTPSAGSCRRAVGP<br>WRTSGRPSRRLPLLATPFWSRCPERDPSQ<br>RVETLRELQNLMLSQLGTSSRRSLTWSP<br>CSGSCRTRRRRRRTGRPWRRRCGA | HLA-A*33:03 | CSGSCRTRCR | 10 | 395.6 | 18.3759 | flameshift deletion |
| Se128 | SIPA1   | NM_153253.29c.2697_2721d<br>eGGCCTCCTTTCTGCCAC<br>GTACCTTG | SEDKGNPAPELSCGTPSAGSCRRAVGP<br>WRTSGRPSRRLPLLATPFWSRCPERDPSQ<br>RVETLRELQNLMLSQLGTSSRRSLTWSP<br>CSGSCRTRRRRRRTGRPWRRRCGA | HLA-B*15:01 | LQNLMLSQL  | 10 | 122   | 18.3759 | flameshift deletion |
| Se128 | SIPA1   | NM_153253.29c.2697_2721d<br>eGGCCTCCTTTCTGCCAC<br>GTACCTTG | SEDKGNPAPELSCGTPSAGSCRRAVGP<br>WRTSGRPSRRLPLLATPFWSRCPERDPSQ<br>RVETLRELQNLMLSQLGTSSRRSLTWSP<br>CSGSCRTRRRRRRTGRPWRRRCGA | HLA-B*15:01 | RRLPLLATPF | 10 | 147.7 | 18.3759 | flameshift deletion |
| Se129 | AFDN    | NM_001291964.1c.953delT                                    | PDHIPKTKKHKWKARHPRERRELTGLAM<br>APPFLRRSCHI                                                                              | HLA-A*11:01 | LAMAPPFLRR | 10 | 86.7  | 17.7512 | flameshift deletion |
| Se129 | AFDN    | NM_001291964.1c.953delT                                    | PDHIPKTKKHKWKARHPRERRELTGLAM<br>APPFLRRSCHI                                                                              | HLA-A*11:01 | GLAMAPPFLR | 10 | 49.4  | 17.7512 | flameshift deletion |
| Se129 | AFDN    | NM_001291964.1c.953delT                                    | PDHIPKTKKHKWKARHPRERRELTGLAM<br>APPFLRRSCHI                                                                              | HLA-A*11:01 | LAMAPPFLR  | 9  | 28    | 17.7512 | flameshift deletion |
| Se129 | AFDN    | NM_001207008.1c.1073delT                                   | PDHIPKTKKHKWKARHPRERRELTGLAM<br>APPFLRRSCHI                                                                              | HLA-A*11:01 | AMAPPFLRR  | 9  | 30.1  | 17.7512 | flameshift deletion |
| Se129 | ZNF585B | NM_152279.3c.136delC                                       | DFSREEWRLDPLRETCTGM                                                                                                      | HLA-C*12:02 | FLRETCTGM  | 9  | 293.3 | 1.87291 | flameshift deletion |
| Se129 | ZNF585B | NM_152279.3c.136delC                                       | DFSREEWRLDPLRETCTGM                                                                                                      | HLA-C*03:03 | FLRETCTGM  | 9  | 466   | 1.87291 | flameshift deletion |
| Se130 | DTX3L   | NM_138287.3c.1474_1475del<br>TT                            | VHFVLNQESMTDWFASKPCKGEAVCSKR<br>RRNVFIGWKEIERGS                                                                          | HLA-A*11:01 | ESMTDWFASK | 9  | 73.1  | 23.9939 | flameshift deletion |

|       |          |                                                                    |                                                                                                                                                 |             |             |    |       |         |                     |
|-------|----------|--------------------------------------------------------------------|-------------------------------------------------------------------------------------------------------------------------------------------------|-------------|-------------|----|-------|---------|---------------------|
| Se130 | DTX3L    | NM_138287.3c.1474_1475delTT                                        | VHFVNLQESMTDWFASKPCKGEAVCSKR<br>RRNVFIGWKEIERS                                                                                                  | HLA-A*11:01 | QESMTDWFASK | 10 | 45.3  | 23.9939 | flameshift deletion |
| Se130 | TRERF1   | NM_001297573.1c.2821delG                                           | IFVQKMKVSKTWSAWSTTTRGKRSCGW<br>GGNTGHAWQKSSTIV                                                                                                  | HLA-A*11:01 | SAWSTTTRGK  | 10 | 57.1  | 1.06368 | flameshift deletion |
| Se130 | TRERF1   | NM_001297573.1c.2821delG                                           | IFVQKMKVSKTWSAWSTTTRGKRSCGW<br>GGNTGHAWQKSSTIV                                                                                                  | HLA-A*11:01 | LSAWSTTTR   | 9  | 169.3 | 1.06368 | flameshift deletion |
| Se130 | TRERF1   | NM_001297573.1c.2821delG                                           | IFVQKMKVSKTWSAWSTTTRGKRSCGW<br>GGNTGHAWQKSSTIV                                                                                                  | HLA-C*12:02 | HAWQKSSTI   | 9  | 178.6 | 1.06368 | flameshift deletion |
| Se130 | KIRREL   | NM_018240.6c.2032_2052del<br>ACAACCAGCCAGCTGTCC<br>TAC             | PPGPAAPAGTDENYEKFNHPF                                                                                                                           | HLA-A*24:02 | NYEKFNSHPF  | 10 | 245.6 | 18.1675 | inframe deletion    |
| Se130 | YIPF5    | NM_001024947.3c.214_237d<br>eGGCATATACTCCAGCTTC<br>ACCTCAG         | PYTGQIYQTPQPFYGNFEDEP                                                                                                                           | HLA-A*11:01 | QIYQTPQPFY  | 10 | 419.3 | 26.2426 | inframe deletion    |
| Se131 | MDN1     | NM_014611.2c.6530_6546del<br>TGTATTGCTTATGCAG                      | ITMEIVNKLEAATQQ                                                                                                                                 | HLA-C*12:02 | ITMEIVNKL   | 9  | 236.3 | 2.29244 | flameshift deletion |
| Se131 | ZNF467   | NM_207336.2c.1200_1233del<br>CAAGCCCTGGCCAGCGC<br>GCCTGGCCGACCGGGC | ALGATVDAPAAAQDPIPWCPSAPPRASGP<br>SSARTAGAASPMGSTWRGTRACTRANGPS<br>PARSVTAASARGLIWSPTPGPTAAPGLSPA<br>LSAAAASAASRTWAATRCTLAAAPTPAP<br>SAPAASAPKPT | HLA-C*12:02 | WAATRCTL    | 9  | 234.9 | 7.47269 | flameshift deletion |
| Se131 | ZNF467   | NM_207336.2c.1200_1233del<br>CAAGCCCTGGCCAGCGC<br>GCCTGGCCGACCGGGC | ALGATVDAPAAAQDPIPWCPSAPPRASGP<br>SSARTAGAASPMGSTWRGTRACTRANGPS<br>PARSVTAASARGLIWSPTPGPTAAPGLSPA<br>LSAAAASAASRTWAATRCTLAAAPTPAP<br>SAPAASAPKPT | HLA-C*12:02 | RTAGAASPM   | 9  | 150.1 | 7.47269 | flameshift deletion |
| Se132 | CXorf40B | NM_001013845.1c.68_69del<br>TG                                     | YAGFVLNGIKTGDALASSAEQPAELYHRR<br>PHCSQGLGRRCLSGAAGGETRDDSCSDSG<br>LAQERGVWSRSDSGTR                                                              | HLA-C*03:04 | SSAEQPAEL   | 9  | 59.4  | 18.0044 | flameshift deletion |
| Se132 | CXorf40B | NM_001013845.1c.68_69del<br>TG                                     | YAGFVLNGIKTGDALASSAEQPAELYHRR<br>PHCSQGLGRRCLSGAAGGETRDDSCSDSG<br>LAQERGVWSRSDSGTR                                                              | HLA-C*03:04 | YAGFVLNGI   | 9  | 421.6 | 18.0044 | flameshift deletion |
| Se132 | CXorf40B | NM_001013845.1c.68_69del<br>TG                                     | YAGFVLNGIKTGDALASSAEQPAELYHRR<br>PHCSQGLGRRCLSGAAGGETRDDSCSDSG<br>LAQERGVWSRSDSGTR                                                              | HLA-A*02:06 | YAGFVLNGI   | 9  | 93.2  | 18.0044 | flameshift deletion |
| Se132 | TDRD5    | NM_001199085.1c.97_99del<br>AAG                                    | TKDGLSPQELEEYLLMVGNHLP                                                                                                                          | HLA-A*02:06 | YLLMVG NHL  | 9  | 46.8  | 1.45442 | inframe deletion    |
| Se132 | TDRD5    | NM_001199085.1c.97_99del<br>AAG                                    | TKDGLSPQELEEYLLMVGNHLP                                                                                                                          | HLA-A*02:06 | ELEEYLLMV   | 9  | 240.3 | 1.45442 | inframe deletion    |
| Se132 | TDRD5    | NM_001199085.1c.97_99del<br>AAG                                    | TKDGLSPQELEEYLLMVGNHLP                                                                                                                          | HLA-C*03:04 | YLLMVG NHL  | 9  | 445.4 | 1.45442 | inframe deletion    |
| Se132 | DCLK2    | NM_001040261.4c.1134_113<br>6delTTC                                | LKQISAHGRSSNVNGPELDRC                                                                                                                           | HLA-C*03:04 | SAHGRSSNV   | 9  | 311.9 | 3.95933 | inframe deletion    |
| Se132 | LMBR1    | NM_022458.3c.904_906delC<br>TT                                     | NLVYPAMVLLIETSISVLLVA                                                                                                                           | HLA-A*02:06 | LLIETSISV   | 9  | 7.7   | 12.4849 | inframe deletion    |
| Se132 | LMBR1    | NM_022458.3c.904_906delC<br>TT                                     | NLVYPAMVLLIETSISVLLVA                                                                                                                           | HLA-A*02:06 | MVLLIETSI   | 9  | 136.5 | 12.4849 | inframe deletion    |
| Se132 | LMBR1    | NM_022458.3c.904_906delC<br>TT                                     | NLVYPAMVLLIETSISVLLVA                                                                                                                           | HLA-A*02:06 | LVYPAMVVL   | 9  | 181.4 | 12.4849 | inframe deletion    |
| Se132 | LMBR1    | NM_022458.3c.904_906delC<br>TT                                     | NLVYPAMVLLIETSISVLLVA                                                                                                                           | HLA-A*02:06 | AVMVLLIET   | 9  | 190.6 | 12.4849 | inframe deletion    |
| Se132 | LMBR1    | NM_022458.3c.904_906delC<br>TT                                     | NLVYPAMVLLIETSISVLLVA                                                                                                                           | HLA-A*02:06 | TSISVLLVA   | 9  | 202.4 | 12.4849 | inframe deletion    |
| Se132 | LMBR1    | NM_022458.3c.904_906delC<br>TT                                     | NLVYPAMVLLIETSISVLLVA                                                                                                                           | HLA-C*03:04 | LVYPAMVVL   | 9  | 10.8  | 12.4849 | inframe deletion    |

|       |        |                                  |                                                          |             |             |    |       |         |                     |
|-------|--------|----------------------------------|----------------------------------------------------------|-------------|-------------|----|-------|---------|---------------------|
| Se132 | LMBR1  | NM_022458.3c.904_906delC<br>TT   | NLVYPAVMVLLIETISISVLLVA                                  | HLA-C*03:04 | LIETISISVL  | 9  | 339.2 | 12.4849 | inframe deletion    |
| Se132 | LMBR1  | NM_022458.3c.904_906delC<br>TT   | NLVYPAVMVLLIETISISVLLVA                                  | HLA-C*03:04 | LLIETISISV  | 9  | 373.1 | 12.4849 | inframe deletion    |
| Se132 | LMBR1  | NM_022458.3c.904_906delC<br>TT   | NLVYPAVMVLLIETISISVLLVA                                  | HLA-C*03:04 | YPAVMVLLI   | 9  | 468.3 | 12.4849 | inframe deletion    |
| Se132 | LMBR1  | NM_022458.3c.904_906delC<br>TT   | NLVYPAVMVLLIETISISVLLVA                                  | HLA-C*08:22 | LVYPAVMVL   | 9  | 211.2 | 12.4849 | inframe deletion    |
| Se132 | LMBR1  | NM_022458.3c.904_906delC<br>TT   | NLVYPAVMVLLIETISISVLLVA                                  | HLA-A*02:06 | VLLIETISISV | 10 | 76    | 12.4849 | inframe deletion    |
| Se132 | LMBR1  | NM_022458.3c.904_906delC<br>TT   | NLVYPAVMVLLIETISISVLLVA                                  | HLA-A*02:06 | LLIETISISVL | 10 | 127.2 | 12.4849 | inframe deletion    |
| Se132 | LMBR1  | NM_022458.3c.904_906delC<br>TT   | NLVYPAVMVLLIETISISVLLVA                                  | HLA-A*02:06 | LVYPAVMVLL  | 10 | 262.7 | 12.4849 | inframe deletion    |
| Se132 | B3GAT3 | NM_012200.3c.61_63delCTC         | LAYFLVSIAGLYALVQLGQPCD                                   | HLA-A*02:06 | SIAGLYALV   | 9  | 14.6  | 31.521  | inframe deletion    |
| Se132 | B3GAT3 | NM_012200.3c.61_63delCTC         | LAYFLVSIAGLYALVQLGQPCD                                   | HLA-A*02:06 | VSIAGLYAL   | 9  | 25.1  | 31.521  | inframe deletion    |
| Se132 | B3GAT3 | NM_012200.3c.61_63delCTC         | LAYFLVSIAGLYALVQLGQPCD                                   | HLA-C*03:04 | VSIAGLYAL   | 9  | 12.7  | 31.521  | inframe deletion    |
| Se132 | B3GAT3 | NM_012200.3c.61_63delCTC         | LAYFLVSIAGLYALVQLGQPCD                                   | HLA-C*08:22 | VSIAGLYAL   | 9  | 112.5 | 31.521  | inframe deletion    |
| Se132 | B3GAT3 | NM_012200.3c.61_63delCTC         | LAYFLVSIAGLYALVQLGQPCD                                   | HLA-A*02:06 | VSIAGLYALV  | 10 | 26.5  | 31.521  | inframe deletion    |
| Se132 | B3GAT3 | NM_012200.3c.61_63delCTC         | LAYFLVSIAGLYALVQLGQPCD                                   | HLA-A*02:06 | LVSIAGLYAL  | 10 | 53.4  | 31.521  | inframe deletion    |
| Se132 | B3GAT3 | NM_012200.3c.61_63delCTC         | LAYFLVSIAGLYALVQLGQPCD                                   | HLA-A*02:06 | FLVSIAGLYA  | 10 | 121.3 | 31.521  | inframe deletion    |
| Se132 | ZFPM1  | NM_153813.2c.1777_1779del<br>TAC | CEITFSNVNNYVHKRLYCSGRR                                   | HLA-A*02:06 | ITFSNVNNYV  | 10 | 125.4 | 1.07327 | inframe deletion    |
| Se132 | TK1    | NM_003258.5c.G704C:p.X23         | QILQCSPANGTCEGRPLPSCHCRLLDAAL<br>HAAQPLQEEVGRRGG         | HLA-A*02:06 | LLDAALHAA   | 9  | 34.1  | 41.316  | stoploss SNV        |
| Se132 | TK1    | NM_003258.5c.G704C:p.X23         | QILQCSPANGTCEGRPLPSCHCRLLDAAL<br>HAAQPLQEEVGRRGG         | HLA-A*02:06 | RLLDAALHAA  | 10 | 39.5  | 41.316  | stoploss SNV        |
| Se132 | TK1    | NM_003258.5c.G704C:p.X23         | QILQCSPANGTCEGRPLPSCHCRLLDAAL<br>HAAQPLQEEVGRRGG         | HLA-A*02:06 | RLLDAALHA   | 9  | 56.3  | 41.316  | stoploss SNV        |
| Se132 | TK1    | NM_003258.5c.G704C:p.X23         | QILQCSPANGTCEGRPLPSCHCRLLDAAL<br>HAAQPLQEEVGRRGG         | HLA-C*03:04 | AALHAAQPL   | 9  | 11.6  | 41.316  | stoploss SNV        |
| Se133 | GRHL2  | NM_024915.3c.956delA             | KNRDEQLKYWKSGLTGSIRRSRGLTLPT<br>RRALIRLETLLKRLHIMLFPLPGT | HLA-C*14:02 | RRSRGSLTL   | 9  | 179   | 22.2053 | flameshift deletion |
| Se133 | GRHL2  | NM_024915.3c.956delA             | KNRDEQLKYWKSGLTGSIRRSRGLTLPT<br>RRALIRLETLLKRLHIMLFPLPGT | HLA-A*33:03 | TLGSIRRSR   | 9  | 127.6 | 22.2053 | flameshift deletion |
| Se133 | GRHL2  | NM_024915.3c.956delA             | KNRDEQLKYWKSGLTGSIRRSRGLTLPT<br>RRALIRLETLLKRLHIMLFPLPGT | HLA-A*02:06 | IMLFPLPGT   | 9  | 189.4 | 22.2053 | flameshift deletion |
| Se133 | GRHL2  | NM_024915.3c.956delA             | KNRDEQLKYWKSGLTGSIRRSRGLTLPT<br>RRALIRLETLLKRLHIMLFPLPGT | HLA-A*02:06 | RLHIMLFPL   | 9  | 75    | 22.2053 | flameshift deletion |

|       |       |                                                |                                                          |             |             |    |       |         |                     |
|-------|-------|------------------------------------------------|----------------------------------------------------------|-------------|-------------|----|-------|---------|---------------------|
| Se133 | GRHL2 | NM_024915.3c.956delA                           | KNRDEQLKYWKSGLTGSIRRSRGLTLPT<br>RRALIRLETLKRLHIMLFLPLPGT | HLA-A*02:06 | HIMLFLPLPGT | 10 | 322.6 | 22.2053 | flameshift deletion |
| Se133 | GRHL2 | NM_024915.3c.956delA                           | KNRDEQLKYWKSGLTGSIRRSRGLTLPT<br>RRALIRLETLKRLHIMLFLPLPGT | HLA-A*33:03 | LPITRRALIR  | 10 | 399.6 | 22.2053 | flameshift deletion |
| Se133 | GRHL2 | NM_024915.3c.956delA                           | KNRDEQLKYWKSGLTGSIRRSRGLTLPT<br>RRALIRLETLKRLHIMLFLPLPGT | HLA-C*14:02 | TLPTIRRAL   | 9  | 435.6 | 22.2053 | flameshift deletion |
| Se133 | PLAT  | NM_033011.3c.859_877delA<br>GGAGGTCGCCCGGAGAGC | HPWQAAIFAKHGSCAGAYSSAPAGFSLPPT<br>ASRRGFRPTT             | HLA-A*33:03 | FSLPPTASR   | 9  | 67.1  | 4.97739 | flameshift deletion |
| Se133 | PLAT  | NM_033011.3c.859_877delA<br>GGAGGTCGCCCGGAGAGC | HPWQAAIFAKHGSCAGAYSSAPAGFSLPPT<br>ASRRGFRPTT             | HLA-A*33:03 | PTASRRGFR   | 9  | 102   | 4.97739 | flameshift deletion |
| Se133 | PLAT  | NM_033011.3c.859_877delA<br>GGAGGTCGCCCGGAGAGC | HPWQAAIFAKHGSCAGAYSSAPAGFSLPPT<br>ASRRGFRPTT             | HLA-B*15:18 | KHGSCAGAY   | 9  | 257.4 | 4.97739 | flameshift deletion |
| Se133 | PLAT  | NM_033011.3c.859_877delA<br>GGAGGTCGCCCGGAGAGC | HPWQAAIFAKHGSCAGAYSSAPAGFSLPPT<br>ASRRGFRPTT             | HLA-C*08:01 | SSAPAGFSL   | 9  | 108.5 | 4.97739 | flameshift deletion |
| Se133 | PLAT  | NM_033011.3c.859_877delA<br>GGAGGTCGCCCGGAGAGC | HPWQAAIFAKHGSCAGAYSSAPAGFSLPPT<br>ASRRGFRPTT             | HLA-C*14:02 | AYSSAPAGF   | 9  | 57.4  | 4.97739 | flameshift deletion |
| Se133 | PLAT  | NM_033011.3c.859_877delA<br>GGAGGTCGCCCGGAGAGC | HPWQAAIFAKHGSCAGAYSSAPAGFSLPPT<br>ASRRGFRPTT             | HLA-C*14:02 | SSAPAGFSL   | 9  | 279   | 4.97739 | flameshift deletion |
| Se133 | PLAT  | NM_033011.3c.859_877delA<br>GGAGGTCGCCCGGAGAGC | HPWQAAIFAKHGSCAGAYSSAPAGFSLPPT<br>ASRRGFRPTT             | HLA-A*02:06 | YSSAPAGFSL  | 10 | 440.6 | 4.97739 | flameshift deletion |
| Se133 | PLAT  | NM_033011.3c.859_877delA<br>GGAGGTCGCCCGGAGAGC | HPWQAAIFAKHGSCAGAYSSAPAGFSLPPT<br>ASRRGFRPTT             | HLA-A*33:03 | GFSLPPTASR  | 10 | 410.9 | 4.97739 | flameshift deletion |
| Se133 | PLAT  | NM_033011.3c.859_877delA<br>GGAGGTCGCCCGGAGAGC | HPWQAAIFAKHGSCAGAYSSAPAGFSLPPT<br>ASRRGFRPTT             | HLA-C*08:01 | YSSAPAGFSL  | 10 | 295.8 | 4.97739 | flameshift deletion |
| Se133 | PLAT  | NM_033011.3c.859_877delA<br>GGAGGTCGCCCGGAGAGC | HPWQAAIFAKHGSCAGAYSSAPAGFSLPPT<br>ASRRGFRPTT             | HLA-A*33:03 | FSLPPTASRR  | 10 | 227.9 | 4.97739 | flameshift deletion |
| Se133 | WSB1  | NM_134265.2c.395delC                           | DGALLATASYDIEYISGIHIMETF                                 | HLA-A*02:06 | ATASYDIEYI  | 10 | 224.5 | 32.0852 | flameshift deletion |
| Se133 | WSB1  | NM_134265.2c.395delC                           | DGALLATASYDIEYISGIHIMETF                                 | HLA-C*14:02 | EYISGIHIM   | 9  | 30.2  | 32.0852 | flameshift deletion |
| Se133 | WSB1  | NM_134265.2c.395delC                           | DGALLATASYDIEYISGIHIMETF                                 | HLA-A*02:06 | LLATASYDI   | 9  | 147.6 | 32.0852 | flameshift deletion |
| Se133 | WSB1  | NM_134265.2c.395delC                           | DGALLATASYDIEYISGIHIMETF                                 | HLA-A*02:06 | YDIEYISGI   | 9  | 110.7 | 32.0852 | flameshift deletion |
| Se133 | WSB1  | NM_015626.8c.833delC                           | DGALLATASYDIEYISGIHIMETF                                 | HLA-C*14:02 | IEYISGIHIM  | 10 | 137.8 | 32.0852 | flameshift deletion |
| Se134 | TMX2  | NM_015959.3c.257_258delT<br>G                  | IVMMKNRRSITGATYRQHFHV                                    | HLA-A*31:01 | RSITGATYRQ  | 10 | 170.9 | 54.9107 | flameshift deletion |
| Se134 | TMX2  | NM_015959.3c.257_258delT<br>G                  | IVMMKNRRSITGATYRQHFHV                                    | HLA-A*31:01 | RRSITGATYR  | 10 | 26.5  | 54.9107 | flameshift deletion |
| Se134 | TMX2  | NM_015959.3c.257_258delT<br>G                  | IVMMKNRRSITGATYRQHFHV                                    | HLA-A*31:01 | RSITGATYR   | 9  | 7.7   | 54.9107 | flameshift deletion |
| Se134 | TMX2  | NM_015959.3c.257_258delT<br>G                  | IVMMKNRRSITGATYRQHFHV                                    | HLA-A*31:01 | ATYRQHFHV   | 9  | 433.9 | 54.9107 | flameshift deletion |
| Se134 | TMX2  | NM_015959.3c.257_258delT<br>G                  | IVMMKNRRSITGATYRQHFHV                                    | HLA-C*14:03 | VMMKNRRSI   | 9  | 179.7 | 54.9107 | flameshift deletion |

|       |          |                                                     |                                                                    |             |            |    |       |         |                     |
|-------|----------|-----------------------------------------------------|--------------------------------------------------------------------|-------------|------------|----|-------|---------|---------------------|
| Se134 | TMX2     | NM_015959.3c.257_258delTG                           | IVMMKNRRSITGATYRQHFHV                                              | HLA-C*14:03 | RRSITGATY  | 9  | 478.1 | 54.9107 | flameshift deletion |
| Se134 | TPRN     | NM_001128228.2c.1443_1460delTCTGCACCCTGCCAGGCC      | KLPYLPHPARPGCVAELQPRGS                                             | HLA-C*14:03 | ARPGCVAEL  | 9  | 351.1 | 8.46133 | inframe deletion    |
| Se134 | TPRN     | NM_001128228.2c.1443_1460delTCTGCACCCTGCCAGGCC      | KLPYLPHPARPGCVAELQPRGS                                             | HLA-A*31:01 | KLPYLPHPAR | 10 | 49.5  | 8.46133 | inframe deletion    |
| Se135 | CRISPLD1 | NM_001286777.1c.868_886delTTTCAGAATGGAATCTTCT       | PVDKRKTYIASQKVYRILQERHSECLLLCETEYLEEDHKDYSKCNISEFCIKL              | HLA-C*12:02 | YSKCNISEF  | 9  | 42.6  | 8.3693  | flameshift deletion |
| Se135 | ZNF232   | NM_001320955.1c.1162_1177delATATGTAAAGAATGTG        | HRRIHSGEKPFGKLDGQAQSSLDIGEFMPEKSLPIELKGRTPDRILHRSNLL               | HLA-C*12:02 | FMPEKSLPI  | 9  | 90.3  | 8.93406 | flameshift deletion |
| Se136 | AFDN     | NM_001291964.1c.846delG                             | KGAKEILDDDDVLYKSSNGQVTKGF                                          | HLA-A*11:01 | SSNGQVTK   | 9  | 68.1  | 5.00562 | flameshift deletion |
| Se136 | AFDN     | NM_001291964.1c.846delG                             | KGAKEILDDDDVLYKSSNGQVTKGF                                          | HLA-A*11:01 | KSSNGQVTK  | 10 | 127.2 | 5.00562 | flameshift deletion |
| Se136 | AFDN     | NM_001291964.1c.846delG                             | KGAKEILDDDDVLYKSSNGQVTKGF                                          | HLA-A*11:01 | ILDDDDVLYK | 10 | 456.2 | 5.00562 | flameshift deletion |
| Se137 | USP13    | NM_003940.2c.370_390delGACGATTAAATAGCAGCAT          | NSKIFLDLDTDYEYEDEAKLVI                                             | HLA-B*35:01 | FLDLDTDYEY | 10 | 352.4 | 7.96561 | inframe deletion    |
| Se138 | EPPK1    | NM_031308.3c.5565_5574delAGCTGCAGAC                 | IKVAAIRGEVTCSTPGSSIRRPCTHFVWGLGDRHSARWSV                           | HLA-A*33:03 | FVWGGLGDR  | 9  | 109.7 | 12.7844 | flameshift deletion |
| Se138 | EPPK1    | NM_031308.3c.5565_5574delAGCTGCAGAC                 | IKVAAIRGEVTCSTPGSSIRRPCTHFVWGLGDRHSARWSV                           | HLA-A*33:03 | HFVWGGLGDR | 10 | 134.3 | 12.7844 | flameshift deletion |
| Se138 | EPPK1    | NM_031308.3c.5565_5574delAGCTGCAGAC                 | IKVAAIRGEVTCSTPGSSIRRPCTHFVWGLGDRHSARWSV                           | HLA-A*33:03 | CSTPGSSIR  | 9  | 423.1 | 12.7844 | flameshift deletion |
| Se138 | GALNT11  | NM_022087.3c.881delT                                | AYSSSPVVRGGSTGDCTSNGLSPFLS                                         | HLA-C*14:03 | TSNGILSPF  | 9  | 261.7 | 7.23323 | flameshift deletion |
| Se138 | GALNT11  | NM_022087.3c.881delT                                | AYSSSPVVRGGSTGDCTSNGLSPFLS                                         | HLA-C*12:02 | TSNGILSPF  | 9  | 145   | 7.23323 | flameshift deletion |
| Se138 | PANK1    | NM_148977.2c.137delG                                | GDQKGAGGGSPAGGARGSPIPRPLGACSRPAPWGRRAGGRAQRRWGSRQEGRSAGFAIPRRRLCGC | HLA-A*33:03 | ACSRPAPWGR | 10 | 478.9 | 7.55075 | flameshift deletion |
| Se138 | PANK1    | NM_148977.2c.137delG                                | GDQKGAGGGSPAGGARGSPIPRPLGACSRPAPWGRRAGGRAQRRWGSRQEGRSAGFAIPRRRLCGC | HLA-A*33:03 | SAGFAIPRRR | 10 | 389.3 | 7.55075 | flameshift deletion |
| Se138 | PANK1    | NM_148977.2c.137delG                                | GDQKGAGGGSPAGGARGSPIPRPLGACSRPAPWGRRAGGRAQRRWGSRQEGRSAGFAIPRRRLCGC | HLA-A*33:03 | CSRPAWGR   | 9  | 32.3  | 7.55075 | flameshift deletion |
| Se138 | PANK1    | NM_148977.2c.137delG                                | GDQKGAGGGSPAGGARGSPIPRPLGACSRPAPWGRRAGGRAQRRWGSRQEGRSAGFAIPRRRLCGC | HLA-A*33:03 | RSAGFAIPR  | 9  | 92.9  | 7.55075 | flameshift deletion |
| Se138 | PANK1    | NM_148977.2c.137delG                                | GDQKGAGGGSPAGGARGSPIPRPLGACSRPAPWGRRAGGRAQRRWGSRQEGRSAGFAIPRRRLCGC | HLA-A*33:03 | RAQRRWGR   | 9  | 271.2 | 7.55075 | flameshift deletion |
| Se138 | PANK1    | NM_148977.2c.137delG                                | GDQKGAGGGSPAGGARGSPIPRPLGACSRPAPWGRRAGGRAQRRWGSRQEGRSAGFAIPRRRLCGC | HLA-A*33:03 | GARGSPIPR  | 9  | 403.2 | 7.55075 | flameshift deletion |
| Se138 | PANK1    | NM_148977.2c.137delG                                | GDQKGAGGGSPAGGARGSPIPRPLGACSRPAPWGRRAGGRAQRRWGSRQEGRSAGFAIPRRRLCGC | HLA-A*33:03 | CSRPAWGRR  | 10 | 124.5 | 7.55075 | flameshift deletion |
| Se138 | TGFBRAP1 | NM_001142621.2c.408_428delAGAAAGTTGCATCATCTCTGT     | ENPVSGDPFCVKRRITQIMFLVY                                            | HLA-C*12:02 | RTIQMFLVY  | 9  | 439.3 | 6.33235 | inframe deletion    |
| Se138 | REST     | NM_001193508.1c.1906_1929delCATGCTCAGATGGAGGGTGCCAG | PVQVEPPPPMEIRPAPDEPVQM                                             | HLA-C*12:02 | VQVEPPPPM  | 9  | 468   | 7.12751 | inframe deletion    |

|       |           |                                                             |                                                          |             |            |    |       |         |                     |
|-------|-----------|-------------------------------------------------------------|----------------------------------------------------------|-------------|------------|----|-------|---------|---------------------|
| Se138 | RAB11FIP1 | NM_001002814.2c.1788_1790delCTC                             | TQSESPSVFSLSSPIAAPIST                                    | HLA-B*44:03 | SESPSVFSL  | 9  | 179.3 | 3.66787 | inframe deletion    |
| Se138 | RAB11FIP1 | NM_001002814.2c.1788_1790delCTC                             | TQSESPSVFSLSSPIAAPIST                                    | HLA-C*12:02 | LSSPIAAPI  | 9  | 66.6  | 3.66787 | inframe deletion    |
| Se138 | RAB11FIP1 | NM_001002814.2c.1788_1790delCTC                             | TQSESPSVFSLSSPIAAPIST                                    | HLA-C*12:02 | SVFSLSSPI  | 9  | 145.4 | 3.66787 | inframe deletion    |
| Se138 | RAB11FIP1 | NM_001002814.2c.1788_1790delCTC                             | TQSESPSVFSLSSPIAAPIST                                    | HLA-C*12:02 | FSLSSPIAA  | 9  | 386.2 | 3.66787 | inframe deletion    |
| Se138 | RAB11FIP1 | NM_001002814.2c.1788_1790delCTC                             | TQSESPSVFSLSSPIAAPIST                                    | HLA-C*14:03 | SVFSLSSPI  | 9  | 106.6 | 3.66787 | inframe deletion    |
| Se138 | RAB11FIP1 | NM_001002814.2c.1788_1790delCTC                             | TQSESPSVFSLSSPIAAPIST                                    | HLA-C*14:03 | LSSPIAAPI  | 9  | 472.1 | 3.66787 | inframe deletion    |
| Se138 | FAM155B   | NM_015686.2c.72_74delCTG                                    | AAALTIACCCWAPRPSDKPCA                                    | HLA-A*33:03 | CCCCWAPR   | 9  | 295.1 | 5.64492 | inframe deletion    |
| Se139 | BRD7      | NM_001173984.2c.830_831delAG                                | GEDGGCWQREGLWRCRSTRLQESQQRK                              | HLA-C*14:03 | LWRCRSTRL  | 9  | 179.5 | 23.8021 | flameshift deletion |
| Se139 | BRD7      | NM_001173984.2c.830_831delAG                                | GEDGGCWQREGLWRCRSTRLQESQQRK                              | HLA-A*33:03 | GLWRCRSTR  | 9  | 249.8 | 23.8021 | flameshift deletion |
| Se139 | BRD7      | NM_013263.4c.830_831delAG                                   | GEDGGCWQREGLWRCRSTRLQESQQRK                              | HLA-A*33:03 | RGLWRCRSTR | 10 | 460.1 | 23.8021 | flameshift deletion |
| Se139 | SKIV2L2   | NM_015360.4c.1622_1642delAAAAGATGAGCCCAACAAATTG             | DDRGIVILMVDGKQLLKGSADP                                   | HLA-C*03:04 | LMVDGKQLL  | 9  | 310.8 | 17.72   | inframe deletion    |
| Se139 | SKIV2L2   | NM_015360.4c.1622_1642delAAAAGATGAGCCCAACAAATTG             | DDRGIVILMVDGKQLLKGSADP                                   | HLA-C*14:03 | LMVDGKQLL  | 9  | 450.4 | 17.72   | inframe deletion    |
| Se139 | ZNF311    | NM_001010877.3c.983_1015delAGAAGCCTCAGAGTGCAGGGACTGTGGGAAGG | ALCRHKKTHSGAFKTRNRLCMH                                   | HLA-A*33:03 | HSGAFKTRNR | 10 | 303.1 | 1.69033 | inframe deletion    |
| Se139 | RNF26     | AB055622.1:c.G1301T:p.X434                                  | CLCQACTEILMRHPVYHRNCLCRRGILQTLNVYLLSLLPCLPTPPCSTQALTLGQH | HLA-A*33:03 | LMRHPVYHR  | 9  | 16.3  | 16.4836 | stoploss SNV        |
| Se139 | RNF26     | AB055622.1:c.G1301T:p.X434                                  | CLCQACTEILMRHPVYHRNCLCRRGILQTLNVYLLSLLPCLPTPPCSTQALTLGQH | HLA-A*33:03 | ILMRHPVYHR | 10 | 53.6  | 16.4836 | stoploss SNV        |
| Se139 | RNF26     | AB055622.1:c.G1301T:p.X434                                  | CLCQACTEILMRHPVYHRNCLCRRGILQTLNVYLLSLLPCLPTPPCSTQALTLGQH | HLA-B*40:06 | TEILMRHPV  | 9  | 62.3  | 16.4836 | stoploss SNV        |
| Se139 | RNF26     | AB055622.1:c.G1301T:p.X434                                  | CLCQACTEILMRHPVYHRNCLCRRGILQTLNVYLLSLLPCLPTPPCSTQALTLGQH | HLA-B*40:06 | CTEILMRHPV | 10 | 246.4 | 16.4836 | stoploss SNV        |
| Se139 | RNF26     | AB055622.1:c.G1301T:p.X434                                  | CLCQACTEILMRHPVYHRNCLCRRGILQTLNVYLLSLLPCLPTPPCSTQALTLGQH | HLA-B*44:03 | TEILMRHPVY | 10 | 115   | 16.4836 | stoploss SNV        |
| Se139 | RNF26     | AB055622.1:c.G1301T:p.X434                                  | CLCQACTEILMRHPVYHRNCLCRRGILQTLNVYLLSLLPCLPTPPCSTQALTLGQH | HLA-C*03:04 | YLLSLLPCL  | 9  | 356   | 16.4836 | stoploss SNV        |
| Se139 | RNF26     | AB055622.1:c.G1301T:p.X434                                  | CLCQACTEILMRHPVYHRNCLCRRGILQTLNVYLLSLLPCLPTPPCSTQALTLGQH | HLA-C*14:03 | CRRGILQTL  | 9  | 316.3 | 16.4836 | stoploss SNV        |
| Se140 | LARP1     | NM_015315.4c.1699delC                                       | YEIDDRDVKISLSPRHITCAGTQGGTAQATTPRVPR                     | HLA-A*31:01 | QATTPRVPR  | 9  | 99    | 31.856  | flameshift deletion |
| Se140 | LARP1     | NM_015315.4c.1699delC                                       | YEIDDRDVKISLSPRHITCAGTQGGTAQATTPRVPR                     | HLA-A*31:01 | VNKISLSPR  | 9  | 100.3 | 31.856  | flameshift deletion |
| Se140 | LARP1     | NM_015315.4c.1699delC                                       | YEIDDRDVKISLSPRHITCAGTQGGTAQATTPRVPR                     | HLA-A*31:01 | GTAQATTPR  | 9  | 136.5 | 31.856  | flameshift deletion |

|       |         |                                                            |                                                                             |             |             |    |       |         |                     |
|-------|---------|------------------------------------------------------------|-----------------------------------------------------------------------------|-------------|-------------|----|-------|---------|---------------------|
| Se140 | LARP1   | NM_015315.4c.1699delC                                      | YEIDDRDVKISLSPRHITCAGTQGGTAQ<br>ATTPRVPR                                    | HLA-A*31:01 | AQATTPRVPR  | 10 | 69.6  | 31.856  | flameshift deletion |
| Se140 | NF1     | NM_000267.3c.5758_5762del<br>TTGAA                         | CISGFSKSSIETPLFGIHDSMAVKSSSFLQA                                             | HLA-C*14:02 | FGIHDSMAV   | 9  | 301   | 6.27017 | flameshift deletion |
| Se140 | NF1     | NM_000267.3c.5758_5762del<br>TTGAA                         | CISGFSKSSIETPLFGIHDSMAVKSSSFLQA                                             | HLA-C*14:02 | MAVKSSSFL   | 9  | 197.3 | 6.27017 | flameshift deletion |
| Se140 | NF1     | NM_001042492.2c.5821_582<br>5delTTGAA                      | CISGFSKSSIETPLFGIHDSMAVKSSSFLQA                                             | HLA-C*14:02 | SMAVKSSSF   | 9  | 150.6 | 6.27017 | flameshift deletion |
| Se140 | USP19   | NM_001199162.1c.1804_180<br>5delGT                         | VNLGNTCFMNSHSVSVQHSPTGLLP                                                   | HLA-A*02:07 | FMNSHSVSV   | 9  | 329   | 13.5271 | flameshift deletion |
| Se140 | USP19   | NM_001199161.1c.1840_184<br>1delGT                         | VNLGNTCFMNSHSVSVQHSPTGLLP                                                   | HLA-C*14:02 | FMNSHSVSV   | 9  | 26.8  | 13.5271 | flameshift deletion |
| Se141 | JUN     | NM_002228.3c.153_178delG<br>CACCTCCGCGCCAAGAAC<br>TCGGACC  | NLADPVGSLKPPHLARRGAAQAGVARAG<br>APDNPVQRAHHHHADPHVVPVQERDR                  | HLA-C*08:01 | HADPHVVPV   | 9  | 31.4  | 47.9843 | flameshift deletion |
| Se141 | JUN     | NM_002228.3c.153_178delG<br>CACCTCCGCGCCAAGAAC<br>TCGGACC  | NLADPVGSLKPPHLARRGAAQAGVARAG<br>APDNPVQRAHHHHADPHVVPVQERDR                  | HLA-A*02:01 | NLADPVGSL   | 9  | 352.4 | 47.9843 | flameshift deletion |
| Se141 | RRNAD1  | NM_015997.3c.361_374delC<br>GACTAACAGCTCC                  | SEFLENPSQSSIPETCQAQEA                                                       | HLA-A*02:01 | FLENPSQSI   | 10 | 306   | 11.2464 | flameshift deletion |
| Se141 | SETD9   | NM_153706.3c.820_828delC<br>GATGTGTT                       | IAYSYDKQSPLVVALRDINQG                                                       | HLA-C*08:01 | YSYDKQSPL   | 9  | 56.7  | 4.0402  | inframe deletion    |
| Se141 | SETD9   | NM_153706.3c.820_828delC<br>GATGTGTT                       | IAYSYDKQSPLVVALRDINQG                                                       | HLA-B*15:01 | KQSPLVVAL   | 10 | 173.8 | 4.0402  | inframe deletion    |
| Se142 | SYNE2   | NM_182914.2c.4486_4488del<br>CAC                           | RHLQEMANSLPFKDGREKTVNQ                                                      | HLA-A*33:03 | NSLPFKDGR   | 9  | 126.8 | 3.4609  | inframe deletion    |
| Se142 | SYNE2   | NM_182914.2c.4486_4488del<br>CAC                           | RHLQEMANSLPFKDGREKTVNQ                                                      | HLA-A*33:03 | EMANSLPFK   | 9  | 439.2 | 3.4609  | inframe deletion    |
| Se142 | SYNE2   | NM_182914.2c.4486_4488del<br>CAC                           | RHLQEMANSLPFKDGREKTVNQ                                                      | HLA-B*44:03 | QEMANSLPF   | 9  | 10.5  | 3.4609  | inframe deletion    |
| Se142 | SYNE2   | NM_182914.2c.4486_4488del<br>CAC                           | RHLQEMANSLPFKDGREKTVNQ                                                      | HLA-C*14:03 | HLQEMANSL   | 9  | 157.3 | 3.4609  | inframe deletion    |
| Se142 | SYNE2   | NM_182914.2c.4486_4488del<br>CAC                           | RHLQEMANSLPFKDGREKTVNQ                                                      | HLA-A*02:06 | LQEMANSLPF  | 10 | 197.2 | 3.4609  | inframe deletion    |
| Se142 | SYNE2   | NM_182914.2c.4486_4488del<br>CAC                           | RHLQEMANSLPFKDGREKTVNQ                                                      | HLA-B*44:03 | LQEMANSLPF  | 10 | 39.3  | 3.4609  | inframe deletion    |
| Se142 | SYNE2   | NM_182914.2c.4486_4488del<br>CAC                           | RHLQEMANSLPFKDGREKTVNQ                                                      | HLA-B*44:03 | QEMANSLPFK  | 10 | 97.4  | 3.4609  | inframe deletion    |
| Se142 | U2AF1L4 | NM_144987.3c.59_88delTTT<br>ACTTTAAGATCGGGTCT<br>GCCGGCACG | FGTEKDKVNCSDRCSRLHNKP                                                       | HLA-B*44:03 | TEKDKVNCSSW | 10 | 302.2 | 3.0133  | inframe deletion    |
| Se143 | MED26   | NM_004831.3c.202delG                                       | INDVRKKTKNESPSGPRSCCGAGRSSSR<br>HTSMRRRCGGWRGPPALPTGAHTTAGRR<br>WGLAHPGASMT | HLA-C*14:02 | RLAHPGASM   | 9  | 273.5 | 5.56254 | flameshift deletion |
| Se143 | MED26   | NM_004831.3c.202delG                                       | INDVRKKTKNESPSGPRSCCGAGRSSSR<br>HTSMRRRCGGWRGPPALPTGAHTTAGRR<br>WGLAHPGASMT | HLA-C*03:04 | SSSRHTSM    | 9  | 162.2 | 5.56254 | flameshift deletion |
| Se143 | MED26   | NM_004831.3c.202delG                                       | INDVRKKTKNESPSGPRSCCGAGRSSSR<br>HTSMRRRCGGWRGPPALPTGAHTTAGRR<br>WGLAHPGASMT | HLA-C*03:04 | RLAHPGASM   | 9  | 100.3 | 5.56254 | flameshift deletion |
| Se143 | MED26   | NM_004831.3c.202delG                                       | INDVRKKTKNESPSGPRSCCGAGRSSSR<br>HTSMRRRCGGWRGPPALPTGAHTTAGRR<br>WGLAHPGASMT | HLA-C*14:02 | SSSRHTSM    | 9  | 383.8 | 5.56254 | flameshift deletion |



|       |        |                          |                                                                                                                     |             |              |    |       |         |                     |
|-------|--------|--------------------------|---------------------------------------------------------------------------------------------------------------------|-------------|--------------|----|-------|---------|---------------------|
| Se143 | SLC6A6 | NM_001134367.3c.2084delG | REPNRWAVEREEPHLTTLAPS                                                                                               | HLA-B*40:02 | EREPHLTTL    | 10 | 265.9 | 10.6477 | flameshift deletion |
| Se143 | SLC6A6 | NM_003043.5c.1781delG    | REPNRWAVEREEPHLTTLAPS                                                                                               | HLA-B*40:02 | REEPHLTTLA   | 10 | 379   | 10.6477 | flameshift deletion |
| Se143 | SLC6A6 | NM_003043.5c.1781delG    | REPNRWAVEREEPHLTTLAPS                                                                                               | HLA-B*40:02 | REEPHLTTL    | 9  | 21    | 10.6477 | flameshift deletion |
| Se143 | TCEB3  | NM_003198.2c.524delA     | ELERPHKVS HGLRGEMRERGVTECHQLTL<br>QTL SLLIMAMFNPLHLVPVLRCTSTTDP<br>WRRTRSPLFHTRSLGKATAMPFRDTS GPA<br>KNDTWV NPMGKGL | HLA-C*03:04 | VTECHQLTL    | 9  | 452.8 | 8.94209 | flameshift deletion |
| Se143 | TCEB3  | NM_003198.2c.524delA     | ELERPHKVS HGLRGEMRERGVTECHQLTL<br>QTL SLLIMAMFNPLHLVPVLRCTSTTDP<br>WRRTRSPLFHTRSLGKATAMPFRDTS GPA<br>KNDTWV NPMGKGL | HLA-C*03:04 | VSHGLRGEM    | 9  | 473   | 8.94209 | flameshift deletion |
| Se143 | TCEB3  | NM_003198.2c.524delA     | ELERPHKVS HGLRGEMRERGVTECHQLTL<br>QTL SLLIMAMFNPLHLVPVLRCTSTTDP<br>WRRTRSPLFHTRSLGKATAMPFRDTS GPA<br>KNDTWV NPMGKGL | HLA-A*02:89 | AMFNPLHLV    | 9  | 4.6   | 8.94209 | flameshift deletion |
| Se143 | TCEB3  | NM_003198.2c.524delA     | ELERPHKVS HGLRGEMRERGVTECHQLTL<br>QTL SLLIMAMFNPLHLVPVLRCTSTTDP<br>WRRTRSPLFHTRSLGKATAMPFRDTS GPA<br>KNDTWV NPMGKGL | HLA-A*02:89 | LIMAMFNPL    | 9  | 27.3  | 8.94209 | flameshift deletion |
| Se143 | TCEB3  | NM_003198.2c.524delA     | ELERPHKVS HGLRGEMRERGVTECHQLTL<br>QTL SLLIMAMFNPLHLVPVLRCTSTTDP<br>WRRTRSPLFHTRSLGKATAMPFRDTS GPA<br>KNDTWV NPMGKGL | HLA-A*02:89 | TLQTL SLLI   | 9  | 100.1 | 8.94209 | flameshift deletion |
| Se143 | TCEB3  | NM_003198.2c.524delA     | ELERPHKVS HGLRGEMRERGVTECHQLTL<br>QTL SLLIMAMFNPLHLVPVLRCTSTTDP<br>WRRTRSPLFHTRSLGKATAMPFRDTS GPA<br>KNDTWV NPMGKGL | HLA-A*02:89 | TLSLLIMAM    | 9  | 343.6 | 8.94209 | flameshift deletion |
| Se143 | TCEB3  | NM_003198.2c.524delA     | ELERPHKVS HGLRGEMRERGVTECHQLTL<br>QTL SLLIMAMFNPLHLVPVLRCTSTTDP<br>WRRTRSPLFHTRSLGKATAMPFRDTS GPA<br>KNDTWV NPMGKGL | HLA-C*03:04 | MAMFNPLHL    | 9  | 3.4   | 8.94209 | flameshift deletion |
| Se143 | TCEB3  | NM_003198.2c.524delA     | ELERPHKVS HGLRGEMRERGVTECHQLTL<br>QTL SLLIMAMFNPLHLVPVLRCTSTTDP<br>WRRTRSPLFHTRSLGKATAMPFRDTS GPA<br>KNDTWV NPMGKGL | HLA-C*03:04 | LIMAMFNPL    | 9  | 34.2  | 8.94209 | flameshift deletion |
| Se143 | TCEB3  | NM_003198.2c.524delA     | ELERPHKVS HGLRGEMRERGVTECHQLTL<br>QTL SLLIMAMFNPLHLVPVLRCTSTTDP<br>WRRTRSPLFHTRSLGKATAMPFRDTS GPA<br>KNDTWV NPMGKGL | HLA-C*03:04 | RSLGKATAM    | 9  | 56.2  | 8.94209 | flameshift deletion |
| Se143 | TCEB3  | NM_003198.2c.524delA     | ELERPHKVS HGLRGEMRERGVTECHQLTL<br>QTL SLLIMAMFNPLHLVPVLRCTSTTDP<br>WRRTRSPLFHTRSLGKATAMPFRDTS GPA<br>KNDTWV NPMGKGL | HLA-C*14:02 | MAMFNPLHL    | 9  | 34.2  | 8.94209 | flameshift deletion |
| Se143 | TCEB3  | NM_003198.2c.524delA     | ELERPHKVS HGLRGEMRERGVTECHQLTL<br>QTL SLLIMAMFNPLHLVPVLRCTSTTDP<br>WRRTRSPLFHTRSLGKATAMPFRDTS GPA<br>KNDTWV NPMGKGL | HLA-C*03:04 | WV NPMGKGL   | 9  | 298.8 | 8.94209 | flameshift deletion |
| Se143 | TCEB3  | NM_003198.2c.524delA     | ELERPHKVS HGLRGEMRERGVTECHQLTL<br>QTL SLLIMAMFNPLHLVPVLRCTSTTDP<br>WRRTRSPLFHTRSLGKATAMPFRDTS GPA<br>KNDTWV NPMGKGL | HLA-C*14:02 | MFNPLHLVPV   | 10 | 481.8 | 8.94209 | flameshift deletion |
| Se143 | TCEB3  | NM_003198.2c.524delA     | ELERPHKVS HGLRGEMRERGVTECHQLTL<br>QTL SLLIMAMFNPLHLVPVLRCTSTTDP<br>WRRTRSPLFHTRSLGKATAMPFRDTS GPA<br>KNDTWV NPMGKGL | HLA-C*14:02 | WRRTRSPLF    | 9  | 107.3 | 8.94209 | flameshift deletion |
| Se143 | TCEB3  | NM_003198.2c.524delA     | ELERPHKVS HGLRGEMRERGVTECHQLTL<br>QTL SLLIMAMFNPLHLVPVLRCTSTTDP<br>WRRTRSPLFHTRSLGKATAMPFRDTS GPA<br>KNDTWV NPMGKGL | HLA-C*14:02 | RSLGKATAM    | 9  | 168.5 | 8.94209 | flameshift deletion |
| Se143 | TCEB3  | NM_003198.2c.524delA     | ELERPHKVS HGLRGEMRERGVTECHQLTL<br>QTL SLLIMAMFNPLHLVPVLRCTSTTDP<br>WRRTRSPLFHTRSLGKATAMPFRDTS GPA<br>KNDTWV NPMGKGL | HLA-A*02:89 | QLTLQTL SLL  | 10 | 482.9 | 8.94209 | flameshift deletion |
| Se143 | TCEB3  | NM_003198.2c.524delA     | ELERPHKVS HGLRGEMRERGVTECHQLTL<br>QTL SLLIMAMFNPLHLVPVLRCTSTTDP<br>WRRTRSPLFHTRSLGKATAMPFRDTS GPA<br>KNDTWV NPMGKGL | HLA-C*03:04 | IMAMFNPLHL   | 10 | 304.1 | 8.94209 | flameshift deletion |
| Se143 | TCEB3  | NM_003198.2c.524delA     | ELERPHKVS HGLRGEMRERGVTECHQLTL<br>QTL SLLIMAMFNPLHLVPVLRCTSTTDP<br>WRRTRSPLFHTRSLGKATAMPFRDTS GPA<br>KNDTWV NPMGKGL | HLA-C*03:04 | LTLQTL SLL   | 9  | 139.5 | 8.94209 | flameshift deletion |
| Se143 | TCEB3  | NM_003198.2c.524delA     | ELERPHKVS HGLRGEMRERGVTECHQLTL<br>QTL SLLIMAMFNPLHLVPVLRCTSTTDP<br>WRRTRSPLFHTRSLGKATAMPFRDTS GPA<br>KNDTWV NPMGKGL | HLA-B*40:02 | HQLTLQTL SLL | 10 | 343   | 8.94209 | flameshift deletion |
| Se143 | TCEB3  | NM_003198.2c.524delA     | ELERPHKVS HGLRGEMRERGVTECHQLTL<br>QTL SLLIMAMFNPLHLVPVLRCTSTTDP<br>WRRTRSPLFHTRSLGKATAMPFRDTS GPA<br>KNDTWV NPMGKGL | HLA-C*14:02 | CHQLTLQTL    | 9  | 204.6 | 8.94209 | flameshift deletion |
| Se143 | TCEB3  | NM_003198.2c.524delA     | ELERPHKVS HGLRGEMRERGVTECHQLTL<br>QTL SLLIMAMFNPLHLVPVLRCTSTTDP<br>WRRTRSPLFHTRSLGKATAMPFRDTS GPA<br>KNDTWV NPMGKGL | HLA-A*02:89 | LTLQTL SLLI  | 10 | 171.3 | 8.94209 | flameshift deletion |

|       |        |                                           |                                                                                                                     |             |            |    |       |         |                     |
|-------|--------|-------------------------------------------|---------------------------------------------------------------------------------------------------------------------|-------------|------------|----|-------|---------|---------------------|
| Se143 | TCEB3  | NM_003198.2c.524delA                      | ELERPHKVS HGLRGEMRERGVTECHQLTL<br>QTLSELLIMAMFNPLHLVPLIRCTSTTDP<br>WRRTRSPLFHTRSLGKATAMPFRDTS GPA<br>KNDTWVNP MGKGL | HLA-A*02:89 | AMFNPLHLVP | 10 | 104.3 | 8.94209 | flameshift deletion |
| Se143 | TCEB3  | NM_003198.2c.524delA                      | ELERPHKVS HGLRGEMRERGVTECHQLTL<br>QTLSELLIMAMFNPLHLVPLIRCTSTTDP<br>WRRTRSPLFHTRSLGKATAMPFRDTS GPA<br>KNDTWVNP MGKGL | HLA-A*02:89 | LLIMAMFNPL | 10 | 36.8  | 8.94209 | flameshift deletion |
| Se143 | TCEB3  | NM_003198.2c.524delA                      | ELERPHKVS HGLRGEMRERGVTECHQLTL<br>QTLSELLIMAMFNPLHLVPLIRCTSTTDP<br>WRRTRSPLFHTRSLGKATAMPFRDTS GPA<br>KNDTWVNP MGKGL | HLA-A*02:89 | IMAMFNPLHL | 10 | 29.7  | 8.94209 | flameshift deletion |
| Se143 | TCEB3  | NM_003198.2c.524delA                      | ELERPHKVS HGLRGEMRERGVTECHQLTL<br>QTLSELLIMAMFNPLHLVPLIRCTSTTDP<br>WRRTRSPLFHTRSLGKATAMPFRDTS GPA<br>KNDTWVNP MGKGL | HLA-A*02:89 | MAMFNPLHLV | 10 | 12.2  | 8.94209 | flameshift deletion |
| Se143 | TCEB3  | NM_003198.2c.524delA                      | ELERPHKVS HGLRGEMRERGVTECHQLTL<br>QTLSELLIMAMFNPLHLVPLIRCTSTTDP<br>WRRTRSPLFHTRSLGKATAMPFRDTS GPA<br>KNDTWVNP MGKGL | HLA-C*14:02 | SPLFHTRSL  | 9  | 345.3 | 8.94209 | flameshift deletion |
| Se143 | TCEB3  | NM_003198.2c.524delA                      | ELERPHKVS HGLRGEMRERGVTECHQLTL<br>QTLSELLIMAMFNPLHLVPLIRCTSTTDP<br>WRRTRSPLFHTRSLGKATAMPFRDTS GPA<br>KNDTWVNP MGKGL | HLA-C*14:02 | LIMAMFNPL  | 9  | 283.2 | 8.94209 | flameshift deletion |
| Se143 | TCEB3  | NM_003198.2c.524delA                      | ELERPHKVS HGLRGEMRERGVTECHQLTL<br>QTLSELLIMAMFNPLHLVPLIRCTSTTDP<br>WRRTRSPLFHTRSLGKATAMPFRDTS GPA<br>KNDTWVNP MGKGL | HLA-C*14:02 | LGKATAMPF  | 9  | 243.8 | 8.94209 | flameshift deletion |
| Se143 | TCEB3  | NM_003198.2c.524delA                      | ELERPHKVS HGLRGEMRERGVTECHQLTL<br>QTLSELLIMAMFNPLHLVPLIRCTSTTDP<br>WRRTRSPLFHTRSLGKATAMPFRDTS GPA<br>KNDTWVNP MGKGL | HLA-C*03:04 | MAMFNPLHLV | 10 | 241.8 | 8.94209 | flameshift deletion |
| Se144 | SH3D19 | NM_001009555.3c.1114_112<br>2delGATCTTCAG | KLPFNRSSSDMKKQSNLATGLS                                                                                              | HLA-A*02:06 | KQSNLATGL  | 9  | 210.5 | 10.3476 | inframe deletion    |
| Se144 | SH3D19 | NM_001009555.3c.1114_112<br>2delGATCTTCAG | KLPFNRSSSDMKKQSNLATGLS                                                                                              | HLA-B*15:01 | KQSNLATGL  | 9  | 468.3 | 10.3476 | inframe deletion    |
| Se145 | ANGPT1 | NM_001314051.1c.431delA                   | GSLDFQRGWKELKVVLEIPPVNIWGMSL<br>FLPLPVRGSTC                                                                         | HLA-A*02:06 | MSLFLPLPV  | 9  | 13.5  | 1.07906 | flameshift deletion |
| Se145 | ANGPT1 | NM_001146.4c.1031delA                     | GSLDFQRGWKELKVVLEIPPVNIWGMSL<br>FLPLPVRGSTC                                                                         | HLA-B*54:01 | LPLPVRGST  | 9  | 122   | 1.07906 | flameshift deletion |
| Se145 | ANGPT1 | NM_001146.4c.1031delA                     | GSLDFQRGWKELKVVLEIPPVNIWGMSL<br>FLPLPVRGSTC                                                                         | HLA-A*02:06 | WGMSLFLPL  | 9  | 112.6 | 1.07906 | flameshift deletion |
| Se145 | ANGPT1 | NM_00119859.2c.1028delA                   | GSLDFQRGWKELKVVLEIPPVNIWGMSL<br>FLPLPVRGSTC                                                                         | HLA-B*54:01 | FLPLPVRGST | 10 | 108.1 | 1.07906 | flameshift deletion |
| Se145 | ANGPT1 | NM_001314051.1c.431delA                   | GSLDFQRGWKELKVVLEIPPVNIWGMSL<br>FLPLPVRGSTC                                                                         | HLA-B*54:01 | LPLPVRGSTC | 10 | 470.3 | 1.07906 | flameshift deletion |
| Se145 | ANGPT1 | NM_001314051.1c.431delA                   | GSLDFQRGWKELKVVLEIPPVNIWGMSL<br>FLPLPVRGSTC                                                                         | HLA-A*24:02 | GWGMSLFLPL | 10 | 420.9 | 1.07906 | flameshift deletion |
| Se145 | ANGPT1 | NM_001314051.1c.431delA                   | GSLDFQRGWKELKVVLEIPPVNIWGMSL<br>FLPLPVRGSTC                                                                         | HLA-A*02:06 | MSLFLPLPVR | 10 | 374   | 1.07906 | flameshift deletion |
| Se145 | ANGPT1 | NM_001314051.1c.431delA                   | GSLDFQRGWKELKVVLEIPPVNIWGMSL<br>FLPLPVRGSTC                                                                         | HLA-A*02:06 | NIGWGMSLFL | 10 | 343.7 | 1.07906 | flameshift deletion |
| Se145 | ANGPT1 | NM_001314051.1c.431delA                   | GSLDFQRGWKELKVVLEIPPVNIWGMSL<br>FLPLPVRGSTC                                                                         | HLA-A*02:06 | WVLEIPPVNI | 10 | 299.7 | 1.07906 | flameshift deletion |
| Se145 | ANGPT1 | NM_001314051.1c.431delA                   | GSLDFQRGWKELKVVLEIPPVNIWGMSL<br>FLPLPVRGSTC                                                                         | HLA-A*02:06 | GMSLFLPLPV | 10 | 26.5  | 1.07906 | flameshift deletion |
| Se145 | ANGPT1 | NM_001314051.1c.431delA                   | GSLDFQRGWKELKVVLEIPPVNIWGMSL<br>FLPLPVRGSTC                                                                         | HLA-B*54:01 | MSLFLPLPV  | 9  | 428   | 1.07906 | flameshift deletion |
| Se145 | ANGPT1 | NM_001314051.1c.431delA                   | GSLDFQRGWKELKVVLEIPPVNIWGMSL<br>FLPLPVRGSTC                                                                         | HLA-A*02:06 | IGWGMSLFL  | 9  | 467.9 | 1.07906 | flameshift deletion |
| Se145 | ANGPT1 | NM_001314051.1c.431delA                   | GSLDFQRGWKELKVVLEIPPVNIWGMSL<br>FLPLPVRGSTC                                                                         | HLA-A*02:06 | KVLEIPPV   | 9  | 316   | 1.07906 | flameshift deletion |

|       |        |                                 |                                                                                                                                                                                          |             |            |    |       |         |                     |
|-------|--------|---------------------------------|------------------------------------------------------------------------------------------------------------------------------------------------------------------------------------------|-------------|------------|----|-------|---------|---------------------|
| Se145 | DMPK   | NM_001288764.1c.1867_1869delGTT | SEALSLLFFAVLSRAAALGCIG                                                                                                                                                                   | HLA-A*02:06 | ALSLLFFAV  | 9  | 19    | 2.97384 | inframe deletion    |
| Se145 | DMPK   | NM_001288764.1c.1867_1869delGTT | SEALSLLFFAVLSRAAALGCIG                                                                                                                                                                   | HLA-A*02:06 | LLFAVLSRA  | 9  | 45.9  | 2.97384 | inframe deletion    |
| Se145 | DMPK   | NM_001288764.1c.1867_1869delGTT | SEALSLLFFAVLSRAAALGCIG                                                                                                                                                                   | HLA-A*02:06 | EALSLLFFA  | 9  | 386.8 | 2.97384 | inframe deletion    |
| Se145 | DMPK   | NM_001288764.1c.1867_1869delGTT | SEALSLLFFAVLSRAAALGCIG                                                                                                                                                                   | HLA-A*02:06 | AVLSRAAAL  | 9  | 496.6 | 2.97384 | inframe deletion    |
| Se145 | DMPK   | NM_001288764.1c.1867_1869delGTT | SEALSLLFFAVLSRAAALGCIG                                                                                                                                                                   | HLA-B*54:01 | FAVLSRAAA  | 9  | 190.2 | 2.97384 | inframe deletion    |
| Se145 | DMPK   | NM_001288764.1c.1867_1869delGTT | SEALSLLFFAVLSRAAALGCIG                                                                                                                                                                   | HLA-A*02:06 | LLFAVLSRAA | 10 | 110.3 | 2.97384 | inframe deletion    |
| Se145 | DMPK   | NM_001288764.1c.1867_1869delGTT | SEALSLLFFAVLSRAAALGCIG                                                                                                                                                                   | HLA-A*02:06 | EALSLLFFAV | 10 | 137   | 2.97384 | inframe deletion    |
| Se145 | DMPK   | NM_001288764.1c.1867_1869delGTT | SEALSLLFFAVLSRAAALGCIG                                                                                                                                                                   | HLA-A*02:06 | LLLFAVLSRA | 10 | 219.4 | 2.97384 | inframe deletion    |
| Se145 | DMPK   | NM_001288764.1c.1867_1869delGTT | SEALSLLFFAVLSRAAALGCIG                                                                                                                                                                   | HLA-A*02:06 | SEALSLLFFA | 10 | 237.5 | 2.97384 | inframe deletion    |
| Se145 | DMPK   | NM_001288764.1c.1867_1869delGTT | SEALSLLFFAVLSRAAALGCIG                                                                                                                                                                   | HLA-A*02:06 | ALSLLFFAVL | 10 | 418.5 | 2.97384 | inframe deletion    |
| Se145 | DMPK   | NM_001288765.1c.1518_1520delGTT | YRRRFPCSCSPFCLVPPPWAAL                                                                                                                                                                   | HLA-A*02:06 | CLVPPPWAA  | 9  | 129.8 | 2.97384 | inframe deletion    |
| Se145 | DMPK   | NM_001288765.1c.1518_1520delGTT | YRRRFPCSCSPFCLVPPPWAAL                                                                                                                                                                   | HLA-A*02:06 | LVPPPWAAL  | 9  | 217.2 | 2.97384 | inframe deletion    |
| Se145 | DMPK   | NM_001288765.1c.1518_1520delGTT | YRRRFPCSCSPFCLVPPPWAAL                                                                                                                                                                   | HLA-A*02:06 | CSCSPFCLV  | 9  | 328.2 | 2.97384 | inframe deletion    |
| Se145 | DMPK   | NM_001288765.1c.1518_1520delGTT | YRRRFPCSCSPFCLVPPPWAAL                                                                                                                                                                   | HLA-A*24:02 | RFPCSCSPF  | 9  | 55.8  | 2.97384 | inframe deletion    |
| Se145 | DMPK   | NM_001288765.1c.1518_1520delGTT | YRRRFPCSCSPFCLVPPPWAAL                                                                                                                                                                   | HLA-B*54:01 | FPCSCSPFC  | 9  | 422   | 2.97384 | inframe deletion    |
| Se145 | DMPK   | NM_001288765.1c.1518_1520delGTT | YRRRFPCSCSPFCLVPPPWAAL                                                                                                                                                                   | HLA-B*54:01 | SPFCLVPPP  | 9  | 464.3 | 2.97384 | inframe deletion    |
| Se145 | DMPK   | NM_001288765.1c.1518_1520delGTT | YRRRFPCSCSPFCLVPPPWAAL                                                                                                                                                                   | HLA-C*01:02 | LVPPPWAAL  | 9  | 340.1 | 2.97384 | inframe deletion    |
| Se145 | DMPK   | NM_001288765.1c.1518_1520delGTT | YRRRFPCSCSPFCLVPPPWAAL                                                                                                                                                                   | HLA-A*02:06 | FCLVPPPWAA | 10 | 57.9  | 2.97384 | inframe deletion    |
| Se145 | DMPK   | NM_001288765.1c.1518_1520delGTT | YRRRFPCSCSPFCLVPPPWAAL                                                                                                                                                                   | HLA-A*24:02 | RRFPCSCSPF | 10 | 201.1 | 2.97384 | inframe deletion    |
| Se147 | EIF4G1 | NM_001194946.1c.2815delC        | KLLKNHDEESLSAFVVCSPPLAKTWLKK<br>PSPEWISISTRWKKSLKRRRHPASALCCR<br>TCWICEGAIGCHAEGIRVPRPLTRSIRRLR<br>WKNIESTKCSWSPRAVTSVGAVLQALP<br>SAVDFFLWMMVAGTQFSAKVAAPLTPH<br>DSPRSPSLAPSILTTSSLHLEGD | HLA-B*54:01 | WPRAVTSVG  | 9  | 332.2 | 75.4709 | flameshift deletion |
| Se147 | EIF4G1 | NM_001194946.1c.2815delC        | KLLKNHDEESLSAFVVCSPPLAKTWLKK<br>PSPEWISISTRWKKSLKRRRHPASALCCR<br>TCWICEGAIGCHAEGIRVPRPLTRSIRRLR<br>WKNIESTKCSWSPRAVTSVGAVLQALP<br>SAVDFFLWMMVAGTQFSAKVAAPLTPH<br>DSPRSPSLAPSILTTSSLHLEGD | HLA-B*54:01 | FPSAKVAAP  | 9  | 269.3 | 75.4709 | flameshift deletion |

|       |        |                                             |                                                                                                                                                                                               |             |            |    |       |         |                     |
|-------|--------|---------------------------------------------|-----------------------------------------------------------------------------------------------------------------------------------------------------------------------------------------------|-------------|------------|----|-------|---------|---------------------|
| Se147 | EIF4G1 | NM_198241.2c.2794delC                       | KLLKNHDEESLSAFVVCSPPLAKTWTLKK<br>PSPEWISISTRWKKSLKRRRHPASALCCR<br>TCWICEGAI GCHAE GIRVPRPLTRSIRRLR<br>WKNIESTSKCSSSWPRAVTSVGAVLQALP<br>SAVDFPLWMMVAGTQFPSAKVAAPLTPH<br>DSRSPSLAPSILTTSSLHLEGD | HLA-B*54:01 | WPRAVTSVGA | 10 | 43.2  | 75.4709 | flameshift deletion |
| Se147 | EIF4G1 | NM_001194946.1c.2815delC                    | KLLKNHDEESLSAFVVCSPPLAKTWTLKK<br>PSPEWISISTRWKKSLKRRRHPASALCCR<br>TCWICEGAI GCHAE GIRVPRPLTRSIRRLR<br>WKNIESTSKCSSSWPRAVTSVGAVLQALP<br>SAVDFPLWMMVAGTQFPSAKVAAPLTPH<br>DSRSPSLAPSILTTSSLHLEGD | HLA-B*54:01 | LPSAVDFPL  | 9  | 151.2 | 75.4709 | flameshift deletion |
| Se147 | EIF4G1 | NM_001194946.1c.2815delC                    | KLLKNHDEESLSAFVVCSPPLAKTWTLKK<br>PSPEWISISTRWKKSLKRRRHPASALCCR<br>TCWICEGAI GCHAE GIRVPRPLTRSIRRLR<br>WKNIESTSKCSSSWPRAVTSVGAVLQALP<br>SAVDFPLWMMVAGTQFPSAKVAAPLTPH<br>DSRSPSLAPSILTTSSLHLEGD | HLA-A*24:02 | LWMMVAGTQF | 10 | 46    | 75.4709 | flameshift deletion |
| Se147 | EIF4G1 | NM_001194946.1c.2815delC                    | KLLKNHDEESLSAFVVCSPPLAKTWTLKK<br>PSPEWISISTRWKKSLKRRRHPASALCCR<br>TCWICEGAI GCHAE GIRVPRPLTRSIRRLR<br>WKNIESTSKCSSSWPRAVTSVGAVLQALP<br>SAVDFPLWMMVAGTQFPSAKVAAPLTPH<br>DSRSPSLAPSILTTSSLHLEGD | HLA-B*39:01 | FPSAKVAAPL | 10 | 180.9 | 75.4709 | flameshift deletion |
| Se147 | EIF4G1 | NM_001194946.1c.2815delC                    | KLLKNHDEESLSAFVVCSPPLAKTWTLKK<br>PSPEWISISTRWKKSLKRRRHPASALCCR<br>TCWICEGAI GCHAE GIRVPRPLTRSIRRLR<br>WKNIESTSKCSSSWPRAVTSVGAVLQALP<br>SAVDFPLWMMVAGTQFPSAKVAAPLTPH<br>DSRSPSLAPSILTTSSLHLEGD | HLA-B*54:01 | FPLWMMVAGT | 10 | 22.3  | 75.4709 | flameshift deletion |
| Se147 | EIF4G1 | NM_001194946.1c.2815delC                    | KLLKNHDEESLSAFVVCSPPLAKTWTLKK<br>PSPEWISISTRWKKSLKRRRHPASALCCR<br>TCWICEGAI GCHAE GIRVPRPLTRSIRRLR<br>WKNIESTSKCSSSWPRAVTSVGAVLQALP<br>SAVDFPLWMMVAGTQFPSAKVAAPLTPH<br>DSRSPSLAPSILTTSSLHLEGD | HLA-B*54:01 | FPLWMMVAG  | 9  | 25.4  | 75.4709 | flameshift deletion |
| Se147 | EIF4G1 | NM_001194946.1c.2815delC                    | KLLKNHDEESLSAFVVCSPPLAKTWTLKK<br>PSPEWISISTRWKKSLKRRRHPASALCCR<br>TCWICEGAI GCHAE GIRVPRPLTRSIRRLR<br>WKNIESTSKCSSSWPRAVTSVGAVLQALP<br>SAVDFPLWMMVAGTQFPSAKVAAPLTPH<br>DSRSPSLAPSILTTSSLHLEGD | HLA-B*39:01 | NHDEESLSA  | 9  | 457   | 75.4709 | flameshift deletion |
| Se147 | EIF4G1 | NM_001194946.1c.2815delC                    | KLLKNHDEESLSAFVVCSPPLAKTWTLKK<br>PSPEWISISTRWKKSLKRRRHPASALCCR<br>TCWICEGAI GCHAE GIRVPRPLTRSIRRLR<br>WKNIESTSKCSSSWPRAVTSVGAVLQALP<br>SAVDFPLWMMVAGTQFPSAKVAAPLTPH<br>DSRSPSLAPSILTTSSLHLEGD | HLA-B*54:01 | FPSAKVAAPL | 10 | 161.3 | 75.4709 | flameshift deletion |
| Se147 | EIF4G1 | NM_001194946.1c.2815delC                    | KLLKNHDEESLSAFVVCSPPLAKTWTLKK<br>PSPEWISISTRWKKSLKRRRHPASALCCR<br>TCWICEGAI GCHAE GIRVPRPLTRSIRRLR<br>WKNIESTSKCSSSWPRAVTSVGAVLQALP<br>SAVDFPLWMMVAGTQFPSAKVAAPLTPH<br>DSRSPSLAPSILTTSSLHLEGD | HLA-C*07:02 | RRRHPASAL  | 9  | 228.9 | 75.4709 | flameshift deletion |
| Se147 | EIF4G1 | NM_198241.2c.2794delC                       | KLLKNHDEESLSAFVVCSPPLAKTWTLKK<br>PSPEWISISTRWKKSLKRRRHPASALCCR<br>TCWICEGAI GCHAE GIRVPRPLTRSIRRLR<br>WKNIESTSKCSSSWPRAVTSVGAVLQALP<br>SAVDFPLWMMVAGTQFPSAKVAAPLTPH<br>DSRSPSLAPSILTTSSLHLEGD | HLA-A*24:02 | EWISISTRW  | 9  | 499.7 | 75.4709 | flameshift deletion |
| Se147 | EIF4G1 | NM_198244.2c.2533delC                       | KLLKNHDEESLSAFVVCSPPLAKTWTLKK<br>PSPEWISISTRWKKSLKRRRHPASALCCR<br>TCWICEGAI GCHAE GIRVPRPLTRSIRRLR<br>WKNIESTSKCSSSWPRAVTSVGAVLQALP<br>SAVDFPLWMMVAGTQFPSAKVAAPLTPH<br>DSRSPSLAPSILTTSSLHLEGD | HLA-B*39:01 | LPSAVDFPL  | 9  | 125.7 | 75.4709 | flameshift deletion |
| Se147 | EPC2   | NM_015630.3c.971_986delA<br>AGAAGAGGCTTCTGA | CKTKHPHLLSLMWFVKRRRSTQSLKQRL                                                                                                                                                                  | HLA-C*07:02 | TKHPHLLSL  | 9  | 399.3 | 9.98948 | flameshift deletion |
| Se147 | EPC2   | NM_015630.3c.971_986delA<br>AGAAGAGGCTTCTGA | CKTKHPHLLSLMWFVKRRRSTQSLKQRL                                                                                                                                                                  | HLA-C*07:02 | KHPHLLSLM  | 9  | 188.3 | 9.98948 | flameshift deletion |
| Se147 | EPC2   | NM_015630.3c.971_986delA<br>AGAAGAGGCTTCTGA | CKTKHPHLLSLMWFVKRRRSTQSLKQRL                                                                                                                                                                  | HLA-B*39:01 | HLLSLMWFV  | 9  | 311.6 | 9.98948 | flameshift deletion |

|       |              |                                                         |                                                                                           |             |            |    |       |         |                       |
|-------|--------------|---------------------------------------------------------|-------------------------------------------------------------------------------------------|-------------|------------|----|-------|---------|-----------------------|
| Se147 | EPC2         | NM_015630.3c.971_986delA<br>AGAAGAGGCTTCTGA             | CKTKHPHLLSLMWFVKRRSTQRSLKQRL                                                              | HLA-B*39:01 | TKHPHLLSL  | 9  | 174.2 | 9.98948 | flameshift deletion   |
| Se147 | RAB6A        | NM_001243718.1c.309delC                                 | QEQPVSEGGCSANLPCHLQPSSEAHCFGPL<br>TLSLTAV                                                 | HLA-B*39:01 | AHCFGPLTL  | 9  | 244.6 | 41.4734 | flameshift deletion   |
| Se147 | RAB6A        | NM_001243719.1c.522delC                                 | QEQPVSEGGCSANLPCHLQPSSEAHCFGPL<br>TLSLTAV                                                 | HLA-B*39:01 | SEAHCFGPL  | 9  | 274.4 | 41.4734 | flameshift deletion   |
| Se147 | RAB6A        | NM_001243719.1c.522delC                                 | QEQPVSEGGCSANLPCHLQPSSEAHCFGPL<br>TLSLTAV                                                 | HLA-B*54:01 | GPLTLSLTA  | 9  | 390   | 41.4734 | flameshift deletion   |
| Se147 | RAB6A        | NM_001243718.1c.309delC                                 | QEQPVSEGGCSANLPCHLQPSSEAHCFGPL<br>TLSLTAV                                                 | HLA-B*54:01 | FGPLTLSLTA | 10 | 11.5  | 41.4734 | flameshift deletion   |
| Se147 | RAB6A        | NM_002869.4c.621delC                                    | QEQPVSEGGCSANLPCHLQPSSEAHCFGPL<br>TLSLTAV                                                 | HLA-A*24:02 | CFGPLTLSL  | 9  | 444.6 | 41.4734 | flameshift deletion   |
| Se147 | PCDHGA1<br>1 | NM_018914.2c.49_51delCTG                                | QRGDRSRLLLLCIFLGTLRGFR                                                                    | HLA-A*24:02 | IFLGTLRGF  | 9  | 321.6 | 17.0247 | inflammation deletion |
| Se147 | PCDHGA1<br>1 | NM_018914.2c.49_51delCTG                                | QRGDRSRLLLLCIFLGTLRGFR                                                                    | HLA-C*07:02 | QRGDRSRL   | 9  | 420.6 | 17.0247 | inflammation deletion |
| Se150 | CDS2         | NM_003818.3c.786delC                                    | IKLSPKKTWEGSLGASLLWCLAFCCPM                                                               | HLA-B*40:01 | WEGSLGASLL | 10 | 20.8  | 12.9103 | flameshift deletion   |
| Se150 | CDS2         | NM_003818.3c.786delC                                    | IKLSPKKTWEGSLGASLLWCLAFCCPM                                                               | HLA-B*40:01 | TWEGSLGASL | 10 | 183.4 | 12.9103 | flameshift deletion   |
| Se150 | CDS2         | NM_003818.3c.786delC                                    | IKLSPKKTWEGSLGASLLWCLAFCCPM                                                               | HLA-B*40:01 | WEGSLGASL  | 9  | 10    | 12.9103 | flameshift deletion   |
| Se150 | CDS2         | NM_003818.3c.786delC                                    | IKLSPKKTWEGSLGASLLWCLAFCCPM                                                               | HLA-B*15:01 | ASLLWCLAF  | 10 | 469.7 | 12.9103 | flameshift deletion   |
| Se150 | IRS1         | NM_005544.2c.1159_1174del<br>ACCAGCCCGGTCAGTC           | PMPASRCSPSACRPVAVVAMAPPRIVSSHG<br>DLVLRCLVPPAMAVSSPRMSMAPVPAISG<br>VPSAVSLRIPWATPHQPAVRRS | HLA-B*15:01 | RMSMAPVPA  | 9  | 390.7 | 3.46986 | flameshift deletion   |
| Se150 | IRS1         | NM_005544.2c.1159_1174del<br>ACCAGCCCGGTCAGTC           | PMPASRCSPSACRPVAVVAMAPPRIVSSHG<br>DLVLRCLVPPAMAVSSPRMSMAPVPAISG<br>VPSAVSLRIPWATPHQPAVRRS | HLA-B*15:01 | MAVSSPRMS  | 10 | 125.3 | 3.46986 | flameshift deletion   |
| Se150 | IRS1         | NM_005544.2c.1159_1174del<br>ACCAGCCCGGTCAGTC           | PMPASRCSPSACRPVAVVAMAPPRIVSSHG<br>DLVLRCLVPPAMAVSSPRMSMAPVPAISG<br>VPSAVSLRIPWATPHQPAVRRS | HLA-B*15:01 | VLRCLVPPAM | 10 | 160.8 | 3.46986 | flameshift deletion   |
| Se150 | IRS1         | NM_005544.2c.1159_1174del<br>ACCAGCCCGGTCAGTC           | PMPASRCSPSACRPVAVVAMAPPRIVSSHG<br>DLVLRCLVPPAMAVSSPRMSMAPVPAISG<br>VPSAVSLRIPWATPHQPAVRRS | HLA-B*15:01 | MSMAPVPAI  | 9  | 301   | 3.46986 | flameshift deletion   |
| Se150 | IRS1         | NM_005544.2c.1159_1174del<br>ACCAGCCCGGTCAGTC           | PMPASRCSPSACRPVAVVAMAPPRIVSSHG<br>DLVLRCLVPPAMAVSSPRMSMAPVPAISG<br>VPSAVSLRIPWATPHQPAVRRS | HLA-B*15:01 | AMAVSSPRM  | 9  | 90.4  | 3.46986 | flameshift deletion   |
| Se150 | IRS1         | NM_005544.2c.1159_1174del<br>ACCAGCCCGGTCAGTC           | PMPASRCSPSACRPVAVVAMAPPRIVSSHG<br>DLVLRCLVPPAMAVSSPRMSMAPVPAISG<br>VPSAVSLRIPWATPHQPAVRRS | HLA-B*15:01 | RMSMAPVPAI | 10 | 121.9 | 3.46986 | flameshift deletion   |
| Se150 | KBTBD2       | NM_015483.2c.1083delT                                   | YWFDAQNTWFQRQCFLSA                                                                        | HLA-A*24:02 | TWFQRQCF   | 9  | 47.4  | 23.2616 | flameshift deletion   |
| Se150 | KBTBD2       | NM_015483.2c.1083delT                                   | YWFDAQNTWFQRQCFLSA                                                                        | HLA-B*15:01 | FQRQCFLSA  | 10 | 441.6 | 23.2616 | flameshift deletion   |
| Se150 | KBTBD2       | NM_015483.2c.1083delT                                   | YWFDAQNTWFQRQCFLSA                                                                        | HLA-A*24:02 | YWFDAQNTW  | 10 | 88.9  | 23.2616 | flameshift deletion   |
| Se150 | LMBRD1       | NM_018368.3c.1572_1593del<br>AGATGAAGATTCAGACAT<br>AAGT | CKGKKSIVIEGVMMSPILLSLSLS                                                                  | HLA-B*40:01 | IEGVMMSP   | 9  | 48.7  | 29.7134 | flameshift deletion   |
| Se150 | LMBRD1       | NM_018368.3c.1572_1593del<br>AGATGAAGATTCAGACAT<br>AAGT | CKGKKSIVIEGVMMSPILLSLSLS                                                                  | HLA-B*15:01 | GVMMSPSIL  | 10 | 233.5 | 29.7134 | flameshift deletion   |

|       |          |                                                         |                                               |             |            |    |       |         |         |                     |
|-------|----------|---------------------------------------------------------|-----------------------------------------------|-------------|------------|----|-------|---------|---------|---------------------|
| Se150 | LMBRD1   | NM_018368.3c.1572_1593del<br>AGATGAAGATTCAGACAT<br>AAGT | CKGKKSVIEGVMMSPILLSLLS                        | HLA-B*15:01 | VMMSPILLS  | 10 | 95.3  |         | 29.7134 | flameshift deletion |
| Se150 | LMBRD1   | NM_018368.3c.1572_1593del<br>AGATGAAGATTCAGACAT<br>AAGT | CKGKKSVIEGVMMSPILLSLLS                        | HLA-B*15:01 | MMSPLSILL  | 9  | 44.4  |         | 29.7134 | flameshift deletion |
| Se150 | LMBRD1   | NM_018368.3c.1572_1593del<br>AGATGAAGATTCAGACAT<br>AAGT | CKGKKSVIEGVMMSPILLSLLS                        | HLA-B*15:01 | VMMSPILLS  | 9  | 34.4  |         | 29.7134 | flameshift deletion |
| Se150 | PTK2B    | NM_004103.4c.2394_2399del<br>GGCTGA                     | SSREEAQLWEVKMRQILDQK                          | HLA-B*40:01 | WEVKMRQIL  | 10 | 162.4 | 3.4396  |         | inframe deletion    |
| Se150 | TMEM184B | NM_012264.5c.A1223T;p.X4                                | LLSSDDEFLVRAAAVEVLAP                          | HLA-B*15:01 | LLSSDDEF   | 9  | 201.5 | 23.3045 |         | stoploss SNV        |
| Se150 | TMEM184B | NM_012264.5c.A1223T;p.X4                                | LLSSDDEFLVRAAAVEVLAP                          | HLA-B*15:01 | LVRAAAVEVL | 10 | 440.4 | 23.3045 |         | stoploss SNV        |
| Se152 | SPRTN    | NM_032018.6c.246_247delA<br>G                           | MTLCAGICSYEEGWNVFHPSQRTPFVEVA<br>KKGSCRDP     | HLA-A*24:02 | CSYEEGWNVF | 10 | 225   | 2.55771 |         | flameshift deletion |
| Se152 | SPRTN    | NM_032018.6c.246_247delA<br>G                           | MTLCAGICSYEEGWNVFHPSQRTPFVEVA<br>KKGSCRDP     | HLA-A*31:01 | GWNVFHPSQR | 10 | 155.5 | 2.55771 |         | flameshift deletion |
| Se152 | SPRTN    | NM_032018.6c.246_247delA<br>G                           | MTLCAGICSYEEGWNVFHPSQRTPFVEVA<br>KKGSCRDP     | HLA-A*24:02 | SYEEGWNVF  | 9  | 60.1  | 2.55771 |         | flameshift deletion |
| Se152 | SPRTN    | NM_032018.6c.246_247delA<br>G                           | MTLCAGICSYEEGWNVFHPSQRTPFVEVA<br>KKGSCRDP     | HLA-C*14:02 | SYEEGWNVF  | 9  | 25.5  | 2.55771 |         | flameshift deletion |
| Se152 | SPRTN    | NM_001261462.2c.246_247d<br>elAG                        | MTLCAGICSYEEGWNVFHPSQRTPFVEVA<br>KKGSCRIPYFSR | HLA-A*31:01 | SCRGIPYFSR | 10 | 115.2 | 2.55771 |         | flameshift deletion |
| Se152 | SPRTN    | NM_001261462.2c.246_247d<br>elAG                        | MTLCAGICSYEEGWNVFHPSQRTPFVEVA<br>KKGSCRIPYFSR | HLA-C*14:02 | FHPSQRTPF  | 9  | 63.8  | 2.55771 |         | flameshift deletion |
| Se152 | SPRTN    | NM_032018.6c.246_247delA<br>G                           | MTLCAGICSYEEGWNVFHPSQRTPFVEVA<br>KKGSCRDP     | HLA-C*14:02 | VFHPSQRTPF | 10 | 156.2 | 2.55771 |         | flameshift deletion |
