# Supplementary material for: Neoantigen load and HLA-class I expression identify a subgroup of tumors with a T-cell-inflamed phenotype and favorable prognosis in homologous recombination-proficient high-grade serous ovarian carcinoma
Source: PubMed Central journal article supplement — J Immunother Cancer. 2020 May 26;8(1):e000375. doi: 10.1136/jitc-2019-000375 (PMC7254153; doi:10.1136/jitc-2019-000375), 2020-05-26
Supplement: jitc-2019-000375supp004.pdf [file jitc-2019-000375supp004.pdf]

**Supplementary Table S4 Predicted neoantigens in 80 HGSC patients**

| Patient ID | Neoantigen                                      |
|------------|-------------------------------------------------|
| Se001      | ST3GAL3_V7L                                     |
| Se001      | KIF2C_V31I                                      |
| Se001      | COL11A1_E307D                                   |
| Se001      | GDAP2_I195M                                     |
| Se001      | DENND4B_H476N                                   |
| Se001      | SLAMF8_R46H                                     |
| Se001      | PCNXL2_K1776M                                   |
| Se001      | CEBPZ_G489S                                     |
| Se001      | P4HTM_D153H                                     |
| Se001      | ATP11B_F859L                                    |
| Se001      | EIF4G1_K447N                                    |
| Se001      | SH3TC1_K731N                                    |
| Se001      | ZMAT2_R116C                                     |
| Se001      | TMEM63B_L423R                                   |
| Se001      | TTI2_I33S                                       |
| Se001      | KCNB2_R496M                                     |
| Se001      | VAV2_S113P                                      |
| Se001      | SNAPC4_A1379P                                   |
| Se001      | FANCF_L192R                                     |
| Se001      | PLEKHB1_R21Q                                    |
| Se001      | GDPD5_D545E                                     |
| Se001      | CHD8_A2231T                                     |
| Se001      | PAK6_D88N                                       |
| Se001      | ZNF106_S26G                                     |
| Se001      | KIF7_I1203K                                     |
| Se001      | EPOR_S318I                                      |
| Se001      | ZNF100_K137T                                    |
| Se001      | PLAUR_V17L                                      |
| Se001      | FIZ1_K49N                                       |
| Se001      | SLC25A1_T266M                                   |
| Se001      | SUN2_Q505E                                      |
| Se001      | MECP2_P191A                                     |
| Se001      | APBA3_DHALHTISYTAASAACWC                        |
| Se001      | DICER1_KEKPETNFPSPTFCAELFLWKEDTQQLS             |
| Se001      | PLXNB2_EALCNTTSECPSSPGSSLRAPWVGASASPSWGPIWASKQG |
| Se001      | TSRGLWPAGTAPFSRNVTPCPPGSCV                      |
| Se001      | SCAF11_ARERRQSQSRSTRESRRSELS                    |
| Se001      | RALGAPA1_NGSYQGALHNATEQNIRAGTQA                 |
| Se004      | ALPL_G349R                                      |
| Se004      | CC2D1B_A387D                                    |
| Se004      | HCN3_W294C                                      |
| Se004      | ARHGEF2_G890C                                   |
| Se004      | SEC16B_G382A                                    |
| Se004      | KIF14_S409C                                     |
| Se004      | ELK4_L392F                                      |
| Se004      | ATAD2B_R1108Q                                   |
| Se004      | CEP68_E755Q                                     |
| Se004      | STK39_T421P                                     |
| Se004      | EPHA4_I141F                                     |
| Se004      | NBEAL2_S999F                                    |
| Se004      | IFRD2_S53F                                      |

|       |                |
|-------|----------------|
| Se004 | GRAMD1C_E274K  |
| Se004 | MFSD10_L209F   |
| Se004 | MAN2B2_R860H   |
| Se004 | WDFY3_G3428R   |
| Se004 | SCOC_R44W      |
| Se004 | DCLK2_P518R    |
| Se004 | MYO10_W1375L   |
| Se004 | CARD6_E201D    |
| Se004 | ERBB2IP_F212Y  |
| Se004 | RASA1_R674C    |
| Se004 | PIP5K2_T1175N  |
| Se004 | EGR1_S501T     |
| Se004 | ABHD16A_D360N  |
| Se004 | ABHD16A_G257A  |
| Se004 | MTCH1_R209H    |
| Se004 | UBR2_W1246R    |
| Se004 | PHF3_N1727I    |
| Se004 | ASCC3_N1368H   |
| Se004 | TUBE1_D22Y     |
| Se004 | MRPL32_S14F    |
| Se004 | COBL_Q1004R    |
| Se004 | TPST1_V265A    |
| Se004 | PEG10_R34T     |
| Se004 | MKLN1_R555K    |
| Se004 | XPO7_R717Q     |
| Se004 | LY6E_C71S      |
| Se004 | USP6NL_A556V   |
| Se004 | IFIT1_C163S    |
| Se004 | ZFYVE27_E71D   |
| Se004 | AFAP1L2_K256R  |
| Se004 | HNRNPUL2_R720Q |
| Se004 | MACROD1_R10C   |
| Se004 | C11orf80_V70L  |
| Se004 | HSPA8_G190V    |
| Se004 | ITPR2_S7C      |
| Se004 | MMP19_F393L    |
| Se004 | SOCS4_G174C    |
| Se004 | CEMP1_I123V    |
| Se004 | CCDC64B_L241F  |
| Se004 | APIG1_T734M    |
| Se004 | TP53_G113D     |
| Se004 | ALKBH5_P322L   |
| Se004 | MED24_Q874H    |
| Se004 | STAT5B_S210F   |
| Se004 | AOC3_L516M     |
| Se004 | MXRA7_P145R    |
| Se004 | ARHGEF1_L602M  |
| Se004 | SLC1A5_V168M   |
| Se004 | HELZ2_D523E    |
| Se004 | CABIN1_Y1300H  |
| Se004 | EP300_S875T    |
| Se004 | PLXNB2_R241W   |
| Se004 | MBTPS2_Q210K   |
| Se004 | BCOR_R861H     |

|       |                                                   |
|-------|---------------------------------------------------|
| Se004 | KRBOX4_L32F                                       |
| Se004 | SUV39H1_I230M                                     |
| Se004 | GPC4_C189F                                        |
| Se004 | KIAA1551_SKTYNLRNVKKLVGSSLIKYGLRLN                |
| Se004 | MLK4_QFLAAKERTKSMCLHYWMLTWKVRAGTTLCHCAE           |
| Se004 | PTPRC_KIEFDNEVDKVNPLGAPEKLPE                      |
| Se004 | DNMT3B_SGDGDSSEYQGWEGVWNRGPRVVGKDQGLLLVARHGGVL    |
| Se004 | EGHL                                              |
| Se005 | PLEKHG5_Y435C                                     |
| Se005 | TTC21B_A279V                                      |
| Se005 | ZNF445_A281V                                      |
| Se005 | CMSS1_N220K                                       |
| Se005 | SYNPO2_S1106F                                     |
| Se005 | MDN1_T2349I                                       |
| Se005 | GSDMD_L134F                                       |
| Se005 | SMARCA2_P127R                                     |
| Se005 | DFNB31_S407N                                      |
| Se005 | SPI1_Q93H                                         |
| Se005 | CD163_P1037T                                      |
| Se005 | RBM25_P750T                                       |
| Se005 | PTPN21_R59Q                                       |
| Se005 | SCAPER_G22C                                       |
| Se005 | MUC16_V9603I                                      |
| Se005 | GNAS_A46P                                         |
| Se005 | PANX2_T188M                                       |
| Se005 | SLC25A43_A89T                                     |
| Se005 | IDH3G_M70I                                        |
| Se005 | GLIS3_MNGRSCTGHREPHRGLGWSVVITFLPSEPTPGLLAPRPVAAHR |
| Se005 | VPLWQALLTTSISRCPOEEGWLLRRTTWLRAASICLP             |
| Se005 | LURAP1_SFLDTVAPSELRDGLGKSYSWWREGOD                |
| Se005 | XPR1_MKFAEHITPEWRKQYIQ                            |
| Se006 | DNAJC11_Y391F                                     |
| Se006 | ARHGEF10L_A97V                                    |
| Se006 | POMGNT1_A377S                                     |
| Se006 | ATXN7L2_R230W                                     |
| Se006 | CEP350_N2321S                                     |
| Se006 | LGR6_T296N                                        |
| Se006 | CR2_Y996H                                         |
| Se006 | GPD2_R91T                                         |
| Se006 | RBMS1_R181H                                       |
| Se006 | SETMAR_G62A                                       |
| Se006 | FGF12_V140D                                       |
| Se006 | USP38_I175L                                       |
| Se006 | CUL7_R503H                                        |
| Se006 | ADGRF5_D383E                                      |
| Se006 | SPIDR_I546K                                       |
| Se006 | VPS13B_K2922N                                     |
| Se006 | DENND3_P867S                                      |
| Se006 | PITRM1_G9V                                        |
| Se006 | PRKCQ_V152L                                       |
| Se006 | CYP2R1_K68M                                       |
| Se006 | CREB3L1_K289E                                     |
| Se006 | VPS51_R152H                                       |
| Se006 | ARHGEF12_F794L                                    |

|       |                                                   |
|-------|---------------------------------------------------|
| Se006 | ETS1_S193L                                        |
| Se006 | APOLD1_E147A                                      |
| Se006 | NUP58_G322V                                       |
| Se006 | AREL1_A586T                                       |
| Se006 | AKT1_P313L                                        |
| Se006 | ZFYVE19_A334P                                     |
| Se006 | COX11_M106R                                       |
| Se006 | SUPT5H_C634S                                      |
| Se006 | EPS8L1_A251V                                      |
| Se006 | MMP9_R61H                                         |
| Se006 | CD40_D183Y                                        |
| Se006 | CSTF1_D263Y                                       |
| Se006 | COL6A2_N968Y                                      |
| Se006 | INPP5J_K287N                                      |
| Se008 | RERE_R465H                                        |
| Se008 | TIMM17A_E7D                                       |
| Se008 | HERC5_R663S                                       |
| Se008 | SLC17A5_L159F                                     |
| Se008 | COMMD5_P150Q                                      |
| Se008 | RABGAP1_H721R                                     |
| Se008 | CPSF6_P276L                                       |
| Se008 | NLRC5_K996R                                       |
| Se008 | TSHZ1_C972W                                       |
| Se008 | LPIN3_N612S                                       |
| Se008 | HLCS_D171N                                        |
| Se008 | ANGEL1_KVARLSDGSHCHLVRGPKFCP                      |
| Se008 | RPA1_TSGGTQSKVVPLPASLLTSPSGPFVLVLPTKVRVSPGATPEGKG |
| Se008 | CCDC127_ISQGRKLVEEKLLEQERAQVMQ                    |
| Se011 | PUS10_D437N                                       |
| Se011 | C3orf18_L78F                                      |
| Se011 | ACAP2_R16G                                        |
| Se011 | G3BP2_V352G                                       |
| Se011 | VCAN_P1018T                                       |
| Se011 | ZNF300_R253T                                      |
| Se011 | NOTCH4_H260Q                                      |
| Se011 | FNDC1_P1094R                                      |
| Se011 | PDK4_G297D                                        |
| Se011 | TGSI_R30M                                         |
| Se011 | KIAA0196_N517S                                    |
| Se011 | MTAP_T118P                                        |
| Se011 | LIMA1_L30Q                                        |
| Se011 | ITGA5_Q900E                                       |
| Se011 | CCDC64_D19Y                                       |
| Se011 | LONP2_R758W                                       |
| Se011 | POLR2A_N997S                                      |
| Se011 | TOP2A_N260K                                       |
| Se011 | GGA3_S309C                                        |
| Se011 | P2RY11_A87V                                       |
| Se011 | ILVBL_V402M                                       |
| Se011 | ARMC6_M437I                                       |
| Se011 | BCAS4_S120P                                       |
| Se011 | MYH9_A849V                                        |
| Se011 | MKNK1_AGHSRSRVFREGDAVSVSGKQEHFGAD                 |
| Se015 | TMEM57_G160W                                      |

|       |                                                              |
|-------|--------------------------------------------------------------|
| Se015 | PDZK1IP1_T13R                                                |
| Se015 | EFCAB7_L497M                                                 |
| Se015 | HLX_H75Y                                                     |
| Se015 | PAX8_P139R                                                   |
| Se015 | GLI2_G109S                                                   |
| Se015 | ITPR1_S159P                                                  |
| Se015 | ABI3BP_S516P                                                 |
| Se015 | ATR_N2342H                                                   |
| Se015 | ZNF354B_G584V                                                |
| Se015 | STK3_D316N                                                   |
| Se015 | PTPRD_R1378S                                                 |
| Se015 | PTPRD_A1205E                                                 |
| Se015 | AGTPBP1_V360I                                                |
| Se015 | ZNF503_S47W                                                  |
| Se015 | ATL3_V434L                                                   |
| Se015 | TRPT1_G54A                                                   |
| Se015 | ADAMTS8_L239Q                                                |
| Se015 | GPATCH2L_S62I                                                |
| Se015 | SMG1_P2599R                                                  |
| Se015 | KIAA0556_A1326G                                              |
| Se015 | PRSS53_C249Y                                                 |
| Se015 | SHPK_N325I                                                   |
| Se015 | KDM6B_S1192R                                                 |
| Se015 | C1QL1_P60A                                                   |
| Se015 | TPGS2_G33C                                                   |
| Se015 | MALT1_G170R                                                  |
| Se015 | MAST1_I324N                                                  |
| Se015 | AKAP8L_A521V                                                 |
| Se015 | CSEIL_D302A                                                  |
| Se015 | STARD8_P227R                                                 |
| Se015 | CENPI_V32L                                                   |
| Se015 | BCORL1_A849V                                                 |
| Se015 | ELF4_R270T                                                   |
| Se015 | DPYD_GLPEVDPETMQLVKHGYLQVMSLVWLTQWNR                         |
| Se015 | ETNK2_MAVPLRPLSRARPFT                                        |
| Se015 | MYPOP_GVIIAPRSEEGHPGPPQPRSLRTPPHTSGEKVSLHGKGAADG<br>NLREIYYL |
| Se016 | KDF1_T272N                                                   |
| Se016 | CELSR2_A2769G                                                |
| Se016 | ZBTB18_L78Q                                                  |
| Se016 | PXDN_R662P                                                   |
| Se016 | IWS1_T651S                                                   |
| Se016 | DNAH7_E85Q                                                   |
| Se016 | ZNF197_A495T                                                 |
| Se016 | ZNF197_P509H                                                 |
| Se016 | DHX29_A869V                                                  |
| Se016 | PPP2R2B_R251W                                                |
| Se016 | GABBR1_R51G                                                  |
| Se016 | BTAF1_V827M                                                  |
| Se016 | MORN4_L47P                                                   |
| Se016 | MAP4K2_L504V                                                 |
| Se016 | C11orf63_Q98H                                                |
| Se016 | CHPT1_R33C                                                   |
| Se016 | HEATR5A_A1304P                                               |

|       |                |
|-------|----------------|
| Se016 | ZIK1_K386T     |
| Se016 | SPATCIL_N140K  |
| Se016 | MTMR1_S270I    |
| Se020 | ZFYVE9_P802T   |
| Se020 | RSBN1_M49T     |
| Se020 | SV2A_R334K     |
| Se020 | YY1API_T421I   |
| Se020 | SLC30A1_I101S  |
| Se020 | MEIS1_V319L    |
| Se020 | DGUOK_R30T     |
| Se020 | BAZ2B_G85A     |
| Se020 | GPR155_Y803H   |
| Se020 | FRZB_G283S     |
| Se020 | COQ10B_K116R   |
| Se020 | KANSL1L_L705S  |
| Se020 | COL6A3_G1374C  |
| Se020 | DCPIA_L35Q     |
| Se020 | FLNB_E753Q     |
| Se020 | GTPBP8_Y95N    |
| Se020 | PPP2R3A_C67S   |
| Se020 | FOXL2_A216V    |
| Se020 | DCP2_D106V     |
| Se020 | SPARC_T27K     |
| Se020 | COL12A1_D652G  |
| Se020 | DLX5_S113R     |
| Se020 | TMEM130_S380P  |
| Se020 | ZNF862_P184T   |
| Se020 | VPS13B_L3454I  |
| Se020 | COL15A1_N807I  |
| Se020 | DOCK1_D1534N   |
| Se020 | UEVLD_H333R    |
| Se020 | MARGPRF_R75S   |
| Se020 | MCAM_K613N     |
| Se020 | ROBO3_V254E    |
| Se020 | ARHGAP9_W11C   |
| Se020 | SLC26A10_T246N |
| Se020 | MON2_E984D     |
| Se020 | CHD8_D1952N    |
| Se020 | MGAT2_D199N    |
| Se020 | NDN_T271N      |
| Se020 | NUSAPI_Y340C   |
| Se020 | UBR1_D1142H    |
| Se020 | WDR59_D531E    |
| Se020 | CDH13_K137R    |
| Se020 | TP53_P146S     |
| Se020 | MYO18A_T436M   |
| Se020 | BPTF_D746H     |
| Se020 | GLTSCR2_A472V  |
| Se020 | NAT14_L64V     |
| Se020 | SOGA1_E455V    |
| Se020 | ZFP64_C335Y    |
| Se020 | TRPM2_K1107M   |
| Se020 | TOP3B_L5V      |
| Se020 | PGK1_G54R      |

|       |                                                                                      |
|-------|--------------------------------------------------------------------------------------|
| Se020 | G6PD_V382L                                                                           |
| Se020 | BCL2L11_NHGGEGDSCPHLPALALLLPDRFSSL                                                   |
| Se020 | DYRK1A_GASAISSWLALKLLHRSLKLLILFKKQPFM                                                |
| Se020 | DYRK1A_VRQFPAPLGWH                                                                   |
| Se020 | WHSC1L1_ESCPASFHPECQKAAGIVMTVKLARNYITSRLFGSNWEITD<br>GGQORSATPGLCH                   |
| Se020 | ZNF274_KVQESSRDCALQGGVQEVQDTV                                                        |
| Se023 | C1orf174_G109A                                                                       |
| Se023 | TRAF5_C81F                                                                           |
| Se023 | BIRC6_V3552A                                                                         |
| Se023 | ING5_E108V                                                                           |
| Se023 | TRAK1_R460C                                                                          |
| Se023 | RBM5_V145M                                                                           |
| Se023 | DZIP3_I336M                                                                          |
| Se023 | BRAT1_L659V                                                                          |
| Se023 | URGCP_G538V                                                                          |
| Se023 | SAMD9_C494F                                                                          |
| Se023 | ABCB8_G495V                                                                          |
| Se023 | ANGPT2_M87R                                                                          |
| Se023 | RAB11FIP1_V20M                                                                       |
| Se023 | PLEKHA2_Y229F                                                                        |
| Se023 | SEMA4D_E243V                                                                         |
| Se023 | FBXW5_V234M                                                                          |
| Se023 | PFKP_G118S                                                                           |
| Se023 | PAMR1_K148M                                                                          |
| Se023 | KMT2D_P3838L                                                                         |
| Se023 | FLT1_A935E                                                                           |
| Se023 | MTRF1_N107S                                                                          |
| Se023 | RNF219_I124V                                                                         |
| Se023 | PAPLN_D959E                                                                          |
| Se023 | STON2_H395Y                                                                          |
| Se023 | ADAL_N287D                                                                           |
| Se023 | MYO1E_V710M                                                                          |
| Se023 | THSD4_G323R                                                                          |
| Se023 | SLC7A6OS_N127S                                                                       |
| Se023 | ATP6V0A1_E166D                                                                       |
| Se023 | FASN_G1002S                                                                          |
| Se023 | RNMT_N320Y                                                                           |
| Se023 | MUC16_T3046A                                                                         |
| Se023 | COLGALT1_H256Y                                                                       |
| Se023 | LPAR2_R303C                                                                          |
| Se023 | RBM42_A177G                                                                          |
| Se023 | MYBPC2_G813V                                                                         |
| Se023 | SLC52A3_A158V                                                                        |
| Se023 | EBAG9_SGDQITLPTTVHQFLSRQMLKSGLPGMKMHPV                                               |
| Se023 | SLC16A2_GCSFAFQPSLVTTFNAAWVWPMVWCLLGVAFSPCPSRSS<br>ECWGIRSSWPKPSRC                   |
| Se023 | ZNF396_MNGSQSSTYRGPMNKMVGLKRDKETLLGKNRNVNMVAK<br>SLVRAQPLFYIRESTVERNLMHVTSVQRHSAEAQF |
| Se023 | PCDHA3_ADIGTNSLLTLQS                                                                 |
| Se024 | CPT2_R634Q                                                                           |
| Se024 | KDM5B_N460D                                                                          |
| Se024 | HPCAL1_E66K                                                                          |
| Se024 | GLI2_R1372Q                                                                          |

|       |                                               |
|-------|-----------------------------------------------|
| Se024 | FAP_G443S                                     |
| Se024 | FN1_P1461S                                    |
| Se024 | HIST1H4E_D86H                                 |
| Se024 | TRRAP_R90W                                    |
| Se024 | ABCB9_R637W                                   |
| Se024 | ALOX5AP_A74E                                  |
| Se024 | MTHFS_I122F                                   |
| Se024 | CDH3_N706S                                    |
| Se024 | TP53_Y88D                                     |
| Se024 | EMILIN2_V906M                                 |
| Se024 | ZNF160_M54V                                   |
| Se024 | HS1BP3_TSRDSSVLDGTVRQGMMKRLSTFLRSKTKWQKRVPRSA |
| Se024 | SEC24A_YSAGSVYYYPSSAQSPSTEITEGTTEIPYSEDWL     |
| Se024 | ARHGAP21_EERGLEYTGIYVPGNNAAISSM               |
| Se025 | MUTYH_R112W                                   |
| Se025 | PIP5K1A_D147N                                 |
| Se025 | CEP350_Q1451E                                 |
| Se025 | HS3ST1_R152H                                  |
| Se025 | GFPT2_V642L                                   |
| Se025 | TECPR1_T842M                                  |
| Se025 | TACC1_V196M                                   |
| Se025 | KNTC1_I1217V                                  |
| Se025 | SPAG9_E189K                                   |
| Se025 | DIP2A_A214T                                   |
| Se025 | ZBED4_T64M                                    |
| Se026 | ECE1_R171H                                    |
| Se026 | LRRN2_S45L                                    |
| Se026 | OR2W3_P182H                                   |
| Se026 | MTHFD2_V205I                                  |
| Se026 | DOCK10_S1776R                                 |
| Se026 | TRANK1_L436I                                  |
| Se026 | ARMC8_D26Y                                    |
| Se026 | ADAP1_P219L                                   |
| Se026 | TMEM184A_I226T                                |
| Se026 | CHD7_A2127S                                   |
| Se026 | SGK3_L214F                                    |
| Se026 | NCOA2_L694F                                   |
| Se026 | VPS13B_I579T                                  |
| Se026 | ZNF462_T1204M                                 |
| Se026 | TRIM32_A513S                                  |
| Se026 | ITIH5_R399G                                   |
| Se026 | NCOA4_F246V                                   |
| Se026 | NR1H4_I478N                                   |
| Se026 | DACT1_N766S                                   |
| Se026 | CSPG4_H1548L                                  |
| Se026 | SETBP1_Q1000L                                 |
| Se026 | MYO5B_V1703A                                  |
| Se026 | ARID3A_C327Y                                  |
| Se026 | DLGAP4_P53S                                   |
| Se026 | OPHN1_H150N                                   |
| Se026 | PCGF3_YLIDATTVTECTPSAGAAW                     |
| Se029 | VPS13D_Q502L                                  |
| Se029 | VWA5A_H190Y                                   |
| Se032 | KLHL21_S401Y                                  |

|       |                                                                                           |
|-------|-------------------------------------------------------------------------------------------|
| Se032 | CAMTA1_A1381T                                                                             |
| Se032 | VGLL4_M199K                                                                               |
| Se032 | NOP16_L53V                                                                                |
| Se032 | RREB1_L9W                                                                                 |
| Se032 | PLPP6_I183F                                                                               |
| Se032 | CLIC3_S222I                                                                               |
| Se032 | WAPL_T1125R                                                                               |
| Se032 | IFT46_D180N                                                                               |
| Se032 | ARID2_H48Q                                                                                |
| Se032 | NCOR2_G1872S                                                                              |
| Se032 | CSPG4_S1188Y                                                                              |
| Se032 | ABCC1_I741M                                                                               |
| Se032 | TP53_G134R                                                                                |
| Se032 | ST6GALNAC1_R391P                                                                          |
| Se032 | SERPINB5_F354S                                                                            |
| Se032 | JAM2_Y43F                                                                                 |
| Se034 | CEP104_A895T                                                                              |
| Se034 | DDAH1_P96R                                                                                |
| Se034 | VTCN1_S44L                                                                                |
| Se034 | CAD_L1342V                                                                                |
| Se034 | POLR1A_Y792D                                                                              |
| Se034 | CXCR4_A251G                                                                               |
| Se034 | STK16_Q124E                                                                               |
| Se034 | PDE6D_V122I                                                                               |
| Se034 | MRPL1_Y148F                                                                               |
| Se034 | RAP1GDS1_L144M                                                                            |
| Se034 | CENPE_K827N                                                                               |
| Se034 | UBR2_H709N                                                                                |
| Se034 | TSPYL4_G52C                                                                               |
| Se034 | ERMARD_L117Q                                                                              |
| Se034 | VCPIP1_D974G                                                                              |
| Se034 | DAPK1_K175N                                                                               |
| Se034 | LRSAM1_E161V                                                                              |
| Se034 | AP3M1_R169W                                                                               |
| Se034 | ZNF143_T321S                                                                              |
| Se034 | AMPD3_N231Y                                                                               |
| Se034 | NUMA1_R958S                                                                               |
| Se034 | SYTL2_K557N                                                                               |
| Se034 | NCOR2_N429I                                                                               |
| Se034 | CDH24_Y349F                                                                               |
| Se034 | ZNF689_L449Q                                                                              |
| Se034 | TOMM34_S135L                                                                              |
| Se034 | MMP9_V348A                                                                                |
| Se034 | ZNFX1_L217F                                                                               |
| Se034 | GEMIN5_RKARSLPLSTQIQRGASSGLFGTSNCKALQRAE                                                  |
| Se034 | HDAC4_KVMEIHSKYWRPQGVV                                                                    |
| Se034 | LRFN4_RPDDLETASPATSGQCPRASSPVSRPSLPATRSASGCWKASG<br>PRCGAGPWVTPRLPCTGSVLTGWLATPPEPGLSPTGP |
| Se035 | SYTL1_P278L                                                                               |
| Se035 | PLXNA2_V100A                                                                              |
| Se035 | OBSCN_R2628H                                                                              |
| Se035 | PNPT1_E355K                                                                               |
| Se035 | WDR19_D493G                                                                               |
| Se035 | RBM27_G953R                                                                               |

|       |                                          |
|-------|------------------------------------------|
| Se035 | CD74_G267R                               |
| Se035 | FAM193B_D461N                            |
| Se035 | FILIP1_R125P                             |
| Se035 | IMMP2L_R155H                             |
| Se035 | DSCC1_H376Y                              |
| Se035 | ANK3_D349G                               |
| Se035 | GBF1_K1029R                              |
| Se035 | FAM24B_A32P                              |
| Se035 | KCTD12_R8S                               |
| Se035 | CHTF18_R164C                             |
| Se035 | ZNF319_C345F                             |
| Se035 | TP53_R141H                               |
| Se035 | METTL2A_C308R                            |
| Se035 | L3MBTL4_R522M                            |
| Se035 | MALT1_V156F                              |
| Se035 | GSK3A_R113C                              |
| Se035 | GNAS_A51T                                |
| Se035 | HELZ2_E276G                              |
| Se035 | MZF1_LRHLTHTEERRLWPGLRAPGRASESAHGRTAFPLR |
| Se035 | EWSR1_QGSKLKVSLARNSMRGGLPPRE             |
| Se037 | ZMYM1_L881I                              |
| Se037 | ASPM_S1110C                              |
| Se037 | DISC1_A473V                              |
| Se037 | RMDN2_F154Y                              |
| Se037 | COQ10B_L10F                              |
| Se037 | CCR1_I246V                               |
| Se037 | ZGRF1_I1814T                             |
| Se037 | PRKAA1_G203V                             |
| Se037 | AP3B1_G832A                              |
| Se037 | LARS_V750A                               |
| Se037 | VARS2_W485S                              |
| Se037 | COL12A1_A223T                            |
| Se037 | MTPN_E49G                                |
| Se037 | RGS22_G92V                               |
| Se037 | FOCAD_D58E                               |
| Se037 | ZEB1_R197S                               |
| Se037 | C11orf80_C57F                            |
| Se037 | CPT1A_L174P                              |
| Se037 | ZW10_T93A                                |
| Se037 | SNX19_V61M                               |
| Se037 | NTM_E184K                                |
| Se037 | CLEC2B_S88R                              |
| Se037 | UBFD1_V163I                              |
| Se037 | CAMKK1_L281V                             |
| Se037 | DPY19L3_A696P                            |
| Se037 | SYNE4_V202F                              |
| Se037 | SIRPB1_P2S                               |
| Se037 | DNTTIP1_S191C                            |
| Se037 | PCDH19_S96I                              |
| Se037 | ZNF821_SSHTEEDGGVEKELENTEQPV             |
| Se037 | DNASE1L1_SSPQLGRSTYMDFYRSHKTQVL          |
| Se039 | TCEB3_Q156L                              |
| Se039 | FUCA1_T459S                              |
| Se039 | FUCA1_Y335C                              |

|       |                 |
|-------|-----------------|
| Se039 | MSTO1_Y278C     |
| Se039 | UHMK1_E275G     |
| Se039 | DDX59_L210V     |
| Se039 | MEIS1_D200N     |
| Se039 | ZAK_E288Q       |
| Se039 | CHPF_R91G       |
| Se039 | ZMYND10_I103M   |
| Se039 | GRAMD1C_L446V   |
| Se039 | IGSF10_T1800M   |
| Se039 | SMC4_Q340H      |
| Se039 | SMC4_K963E      |
| Se039 | HNRNPDL_A39V    |
| Se039 | SCD5_Q203E      |
| Se039 | PPP3CA_K382N    |
| Se039 | LRBA_V2630L     |
| Se039 | DDX60L_M239I    |
| Se039 | TRIO_V1589I     |
| Se039 | LMBRD1_Y495C    |
| Se039 | PHIP_E356D      |
| Se039 | FAM71F2_V85M    |
| Se039 | FLNC_P1411S     |
| Se039 | ZNF862_V308A    |
| Se039 | VPS13B_Q3975R   |
| Se039 | RAD21_L14P      |
| Se039 | RPL8_T111S      |
| Se039 | NPR2_Y663C      |
| Se039 | FKBP15_V281G    |
| Se039 | DIP2C_G187E     |
| Se039 | KIAA1217_H126Y  |
| Se039 | AFAP1L2_I113M   |
| Se039 | CYP2E1_Q148K    |
| Se039 | NAALADL1_F431Y  |
| Se039 | RBM14_S612C     |
| Se039 | PITPNM1_T777M   |
| Se039 | TMEM126B_W140C  |
| Se039 | ZBTB44_E301K    |
| Se039 | ITGA5_G845S     |
| Se039 | GLS2_V8F        |
| Se039 | MICU2_G46V      |
| Se039 | RNF6_C635F      |
| Se039 | FAM63B_N181Y    |
| Se039 | POLG_G114R      |
| Se039 | MAN2A2_P139A    |
| Se039 | ATP6V0C_A27P    |
| Se039 | KIAA0100_R1075T |
| Se039 | SEC14L1_G215V   |
| Se039 | MOCOS_R183L     |
| Se039 | ZNF407_D183H    |
| Se039 | ADNP2_A114P     |
| Se039 | THOP1_K286N     |
| Se039 | CLPP_C144Y      |
| Se039 | TRIP10_Q175E    |
| Se039 | JAK3_T21M       |
| Se039 | GPR4_L308M      |

|       |                                                                                                                              |
|-------|------------------------------------------------------------------------------------------------------------------------------|
| Se039 | C20orf196_G9V                                                                                                                |
| Se039 | UCKL1_I488N                                                                                                                  |
| Se039 | CLIC6_L613V                                                                                                                  |
| Se039 | PISD_F318L                                                                                                                   |
| Se039 | APOL6_G246V                                                                                                                  |
| Se039 | SH3BP1_R312L                                                                                                                 |
| Se039 | ATRX_T13R                                                                                                                    |
| Se039 | OCRL_H598N                                                                                                                   |
| Se039 | TP53_PDDIEQWFTEDQVQMKLPECQRLLPWPLHQQLLHRRPLHQPP<br>PGPCHLLSLPRKPTRAATVSVWASCILGQPSL                                          |
| Se039 | USP15_TASEDQIVSKATRDKTLVELAFFLLTEKLKVLQPLASH                                                                                 |
| Se039 | CAND1_CECAEEGTRNVAECLGKLTLD                                                                                                  |
| Se039 | MCTP2_QLWNGIISITFVGREECLRRKHDRDVCVKTRSEV                                                                                     |
| Se043 | PPARG_N24D                                                                                                                   |
| Se043 | RHOBTB3_L274V                                                                                                                |
| Se043 | DDHD2_V515L                                                                                                                  |
| Se043 | AGO2_S253F                                                                                                                   |
| Se043 | CDH23_V1137E                                                                                                                 |
| Se043 | CD19_E243K                                                                                                                   |
| Se043 | TP53_K32E                                                                                                                    |
| Se043 | EPB41L3_R129S                                                                                                                |
| Se043 | CEP192_L1428S                                                                                                                |
| Se043 | ICAM1_R225W                                                                                                                  |
| Se043 | LIN37_P65L                                                                                                                   |
| Se044 | BEST4_G19C                                                                                                                   |
| Se044 | GMCL1_K482N                                                                                                                  |
| Se044 | PIKFYVE_L1632I                                                                                                               |
| Se044 | UGDH_E150Q                                                                                                                   |
| Se044 | ANKRD37_R144P                                                                                                                |
| Se044 | PDZD2_R565H                                                                                                                  |
| Se044 | GIN1_G409W                                                                                                                   |
| Se044 | GOLGA2_A154G                                                                                                                 |
| Se044 | ATG2A_L288V                                                                                                                  |
| Se044 | ARL2_S151I                                                                                                                   |
| Se044 | TENM4_H2344Q                                                                                                                 |
| Se044 | LRP1_A2366T                                                                                                                  |
| Se044 | MYCBP2_T2374A                                                                                                                |
| Se044 | SYNE2_E694D                                                                                                                  |
| Se044 | AMFR_D576N                                                                                                                   |
| Se044 | TP53_G112D                                                                                                                   |
| Se044 | FCGBP_C758G                                                                                                                  |
| Se044 | AGRN_SNPCATKVFQGSWSWRASRASCSTRPRWLTPSQNCSEGRQPG<br>ALRAPWTTSSGIQTSRRIFGVSACGTWGPANPSAPLWMCTLTPPQPSG<br>HPTWPGPCSGRSRCPGAGPWG |
| Se044 | RAI14_VSVLASKLKESEREREGPFRGCPD                                                                                               |
| Se044 | SHROOM3_PGAAHVVGSTSIKSEAESTP                                                                                                 |
| Se044 | FBXO21_PISMSLLYLITVEPVNFPSHFL                                                                                                |
| Se044 | MYCBP2_NDPAGYAMNRYVCYKCRKAYFG                                                                                                |
| Se047 | WDTC1_T305N                                                                                                                  |
| Se047 | POGZ_K719M                                                                                                                   |
| Se047 | RASSF5_L191V                                                                                                                 |
| Se047 | TTC7A_G106A                                                                                                                  |
| Se047 | DCTN1_L67V                                                                                                                   |
| Se047 | FN1_L1952F                                                                                                                   |

|       |               |
|-------|---------------|
| Se047 | BOC_S666Y     |
| Se047 | WDR19_D355Y   |
| Se047 | FAM24B_K34N   |
| Se047 | HELZ_S752C    |
| Se047 | LLGL2_G370D   |
| Se047 | ZBTB14_L231F  |
| Se047 | CAPS_G195A    |
| Se047 | SARS2_E301K   |
| Se047 | CBFA2T2_R329H |
| Se047 | PABPC1L_V518F |
| Se047 | TYMP_D209H    |
| Se047 | PHKA1_I562V   |
| Se047 | G6PD_K538M    |
| Se048 | LEPR_S791C    |
| Se048 | WDR54_L244I   |
| Se048 | GYPC_D27G     |
| Se048 | WDR1_Q14E     |
| Se048 | RAD23B_M267I  |
| Se048 | DCHS1_R2217H  |
| Se048 | DDX51_S561N   |
| Se048 | ZNF592_R608Q  |
| Se048 | LRRK1_T1196M  |
| Se048 | TP53_S82C     |
| Se048 | PHF20_P570L   |
| Se048 | DLGAP4_E210K  |
| Se049 | TAF1A_I163M   |
| Se049 | PYCR2_E36Q    |
| Se049 | C1orf131_L32V |
| Se049 | MBD5_H218Y    |
| Se049 | C3orf18_T56M  |
| Se049 | PARP14_I921V  |
| Se049 | NDFIP1_R111M  |
| Se049 | SETX_V1974L   |
| Se049 | RNF31_R374C   |
| Se049 | EPG5_Q2519P   |
| Se049 | NACCI_R89Q    |
| Se049 | CLASRP_D274Y  |
| Se049 | ZNF264_V569L  |
| Se049 | TRMT6_L114F   |
| Se050 | PCNXL2_L609V  |
| Se050 | CCDC138_A225G |
| Se050 | MOGAT1_V333L  |
| Se050 | SENP7_H512R   |
| Se050 | LGI2_A509S    |
| Se050 | CLCN3_L432V   |
| Se050 | PCDHGB4_R645C |
| Se050 | MAP3K7_H244R  |
| Se050 | PTPRK_N986H   |
| Se050 | PLAGL1_F232L  |
| Se050 | SLC12A9_T190I |
| Se050 | YAP1_R124G    |
| Se050 | TP53_R116W    |
| Se050 | NLK_V61L      |
| Se050 | DLGAP1_H119P  |

|       |                                                                        |
|-------|------------------------------------------------------------------------|
| Se050 | DSG2_A8S                                                               |
| Se050 | SHKBP1_W225L                                                           |
| Se050 | PPP1R37_S291P                                                          |
| Se050 | PPP1R37_S291L                                                          |
| Se050 | BCL2L12_Y162C                                                          |
| Se050 | UQCC1_V18I                                                             |
| Se050 | CBY1_R79M                                                              |
| Se050 | ARHGEF6_C139R                                                          |
| Se050 | ARHGEF7_SFSKGDVIHVTVGHTQRPDRLVPPQLRARGQGQREACV<br>SQIRNTEEPSQRI        |
| Se050 | CA11_LSELRLFGARSRLGTSDQPPGLLC                                          |
| Se050 | IQGAP1_QQYQRRLAAVASRRVLLRRLFVN                                         |
| Se050 | IRS1_VKDFKQCPQECSLPHPHPLINPWA AVRAAPPAAQVRI                            |
| Se050 | ROBO4_LKHRMDHSDSQGPEQQQPQSSAGGGCPGPTLSSLLALLG<br>LPKPRRAPASRHQHFLWLPHR |
| Se050 | ZBTB44_FQCPTCGVRFTVFRT                                                 |
| Se050 | TNS1_PGAFIIRDHSMKVSSPPPTIM                                             |
| Se051 | CELSR2_A106T                                                           |
| Se051 | ATP1A1_D202Y                                                           |
| Se051 | RCSD1_P122L                                                            |
| Se051 | ASPM_K1802E                                                            |
| Se051 | HLX_G29V                                                               |
| Se051 | NTPCR_T132M                                                            |
| Se051 | KCNK1_K176N                                                            |
| Se051 | CDCA7_S34F                                                             |
| Se051 | PODXL2_P304L                                                           |
| Se051 | ATP13A3_Y618C                                                          |
| Se051 | ICE1_N1870Y                                                            |
| Se051 | PCDH12_Q964R                                                           |
| Se051 | SAP30L_N79S                                                            |
| Se051 | TP53I11_A137V                                                          |
| Se051 | WNK1_K940N                                                             |
| Se051 | NR4A1_A504S                                                            |
| Se051 | CCDC92_S8N                                                             |
| Se051 | EP400_L2658V                                                           |
| Se051 | TFDP1_Q222E                                                            |
| Se051 | TP53_R116Q                                                             |
| Se051 | COASY_L312M                                                            |
| Se051 | EPS15L1_T536M                                                          |
| Se051 | SIGLEC10_I476V                                                         |
| Se051 | KIF3B_V314A                                                            |
| Se051 | PREX1_R198M                                                            |
| Se051 | SYNJ1_R638T                                                            |
| Se051 | MYH9_L1449P                                                            |
| Se051 | PLS3_H210D                                                             |
| Se051 | DKC1_R298W                                                             |
| Se051 | BRCA1_HPEKYQGSSVSTCMWSHVAQILMPAHYSMRTAVVYSLKTE                         |
| Se051 | KIAA1161_FVREPTGRLPASARC                                               |
| Se051 | POLR3C_YAEVSNTFVRLPFGTYH                                               |
| Se051 | PSMB1_TILYSRRFFPYLMKKERGLYTALIQ                                        |
| Se054 | STIL_Q638K                                                             |
| Se054 | TXNIP_V123L                                                            |
| Se054 | PREPL_G298A                                                            |
| Se054 | ITGB6_G80R                                                             |

|       |                                                   |
|-------|---------------------------------------------------|
| Se054 | PHC3_N813S                                        |
| Se054 | CUL9_V1877L                                       |
| Se054 | DNAH11_R852S                                      |
| Se054 | LRWD1_T286I                                       |
| Se054 | FZD3_Q471E                                        |
| Se054 | CDK5RAP2_D881N                                    |
| Se054 | VWF_E581D                                         |
| Se054 | SPINT1_V256L                                      |
| Se054 | ADAMTSL3_H424Y                                    |
| Se054 | CSNK2A2_N119S                                     |
| Se054 | KDM6B_L173R                                       |
| Se054 | P3H4_Q46L                                         |
| Se054 | LAMA3_S1494C                                      |
| Se054 | DSG2_S351R                                        |
| Se054 | CPAMD8_P217H                                      |
| Se054 | BMP7_S13T                                         |
| Se054 | TNRC6B_R1319W                                     |
| Se054 | PLEKHG5_YLNEFHSAVGALCRGWVDTIYN                    |
| Se059 | COL9A2_Q489H                                      |
| Se059 | HMCN1_S3553C                                      |
| Se059 | KIF21B_R832W                                      |
| Se059 | LYPD6B_N133Y                                      |
| Se059 | DHX30_K846Q                                       |
| Se059 | CLDN16_L90F                                       |
| Se059 | ARSI_S290R                                        |
| Se059 | CASP8AP2_L1497V                                   |
| Se059 | TSC22D4_L246F                                     |
| Se059 | ING3_F22L                                         |
| Se059 | ERMP1_L817F                                       |
| Se059 | BNC2_C446Y                                        |
| Se059 | ARHGAP21_K229Q                                    |
| Se059 | ACBD5_L85V                                        |
| Se059 | TCF7L2_A148V                                      |
| Se059 | CHST11_V107L                                      |
| Se059 | ARHGEF7_R651W                                     |
| Se059 | ADCY4_A676P                                       |
| Se059 | TRIP11_E67D                                       |
| Se059 | CIITA_L861M                                       |
| Se059 | MNT_G534S                                         |
| Se059 | TP53_M114V                                        |
| Se059 | SLC26A11_I271V                                    |
| Se059 | KIAA1468_R867G                                    |
| Se059 | CDKN2D_A37T                                       |
| Se059 | CILP2_R112H                                       |
| Se059 | SLC1A5_A172G                                      |
| Se059 | SLC2A11_R2T                                       |
| Se059 | MTOR_CRIVKGYTLADGGSFDPASDA                        |
| Se059 | PER2_FDYSPIRFRARTESTSRWTPAGPASSTHGAGKSPSSLGGTKSGW |
| Se060 | MOV10_Y180C                                       |
| Se060 | FAM189B_V81I                                      |
| Se060 | OBSCN_P2494A                                      |
| Se060 | YIPF4_L178V                                       |
| Se060 | BIRC6_E2160K                                      |
| Se060 | CCDC88A_R882H                                     |

|       |                                                         |
|-------|---------------------------------------------------------|
| Se060 | DYSF_R1572L                                             |
| Se060 | ATG7_K350N                                              |
| Se060 | GOLGB1_A1991T                                           |
| Se060 | SH3RF1_G393R                                            |
| Se060 | CFTR_R1066C                                             |
| Se060 | MAF1_R120Q                                              |
| Se060 | JAK2_Y934H                                              |
| Se060 | TMEM216_L65R                                            |
| Se060 | MYRF_D427N                                              |
| Se060 | ARHGEF17_P1035L                                         |
| Se060 | RALGAPA1_G934A                                          |
| Se060 | SEMA6D_V21F                                             |
| Se060 | FAM195A_N138Y                                           |
| Se060 | AMDHD2_G9R                                              |
| Se060 | ITGAX_S357R                                             |
| Se060 | DNMT1_P7T                                               |
| Se060 | LYL1_G221V                                              |
| Se060 | DTD1_D138Y                                              |
| Se060 | SIK1_D506E                                              |
| Se067 | CLDN19_V167L                                            |
| Se067 | CYP4B1_L8V                                              |
| Se067 | CMTM6_G114E                                             |
| Se067 | SCN5A_F1604L                                            |
| Se067 | ITPR3_V1058M                                            |
| Se067 | AIG1_P139T                                              |
| Se067 | CCZ1B_C184Y                                             |
| Se067 | KMT2E_P1832A                                            |
| Se067 | ADAMTSL2_V478M                                          |
| Se067 | PPP3CB_L386V                                            |
| Se067 | SIDT2_T311S                                             |
| Se067 | BHLHE41_K76E                                            |
| Se067 | OPRL1_N21T                                              |
| Se067 | RRPIB_D115N                                             |
| Se067 | KMT2D_NHVAAGSGQERVLVIPPSLVPTRPILLRE                     |
| Se067 | TRAF6_LVRCEVSTRFLTWVAFGGRVFSHEVLMQGYSLPSLAQKQLP<br>GENS |
| Se068 | CGN_R845S                                               |
| Se068 | PKP4_G446D                                              |
| Se068 | TKT_I274M                                               |
| Se068 | CPE_S424L                                               |
| Se068 | C2_G169C                                                |
| Se068 | AIMP2_D74H                                              |
| Se068 | CYC1_K315N                                              |
| Se068 | SEC24C_P621A                                            |
| Se068 | DLG4_R148Q                                              |
| Se068 | NLE1_R119H                                              |
| Se068 | ZNF763_Y158C                                            |
| Se068 | SPINT2_D29H                                             |
| Se068 | ZNF182_P4H                                              |
| Se068 | CUX1_YKRLIDVPDPVGQQLQKLVQRL                             |
| Se068 | ZRSR2_NPNNEFWANRTGSSFGKNSER                             |
| Se071 | SPEG_R1350C                                             |
| Se071 | TNIK_R1262T                                             |
| Se071 | PIK3CA_H1047R                                           |

|       |                              |
|-------|------------------------------|
| Se071 | KCNK5_S295Y                  |
| Se071 | BTRC_T391I                   |
| Se071 | SYT13_R303C                  |
| Se071 | GPRC5B_C267S                 |
| Se071 | PPP2R1A_P179R                |
| Se071 | SLC4A11_G766R                |
| Se071 | GAL3ST1_D128N                |
| Se071 | PHKA2_T842R                  |
| Se071 | TDRD7_IAHVYLFTPKNDPHRSINRQIT |
| Se101 | MRPL37_Y31C                  |
| Se101 | PHLDB2_S196L                 |
| Se101 | SLC22A5_I146V                |
| Se101 | UBE2J1_S9T                   |
| Se101 | THAP1_T138A                  |
| Se101 | TTF1_G121R                   |
| Se101 | BAD_A78V                     |
| Se101 | RBM23_L380V                  |
| Se101 | FANCM_P936T                  |
| Se101 | NDC80_K271T                  |
| Se101 | GDF15_D136A                  |
| Se101 | ZNF431_G16V                  |
| Se101 | RBL1_S1013N                  |
| Se101 | RBPJL_L250H                  |
| Se102 | MMEL1_L287F                  |
| Se102 | OMA1_V299M                   |
| Se102 | PDE4B_D225E                  |
| Se102 | STRN_W490G                   |
| Se102 | CNNM4_C151R                  |
| Se102 | WDR33_M423I                  |
| Se102 | FN1_P1111T                   |
| Se102 | TRNT1_S269L                  |
| Se102 | FLNB_V1220L                  |
| Se102 | PCCB_R410W                   |
| Se102 | IL1RAP_S575T                 |
| Se102 | LAP3_L511F                   |
| Se102 | PCDHGB1_D662E                |
| Se102 | GCNT2_Q193K                  |
| Se102 | MRPS10_S90T                  |
| Se102 | ELFN1_Y379N                  |
| Se102 | FOXK1_A317V                  |
| Se102 | TMEM130_S52R                 |
| Se102 | CDK5_L235R                   |
| Se102 | SCRIB_A1325V                 |
| Se102 | CENPP_E63Q                   |
| Se102 | STXBP1_L582V                 |
| Se102 | ST6GALNAC4_A19S              |
| Se102 | ADAMTSL2_R221L               |
| Se102 | LCOR_L354R                   |
| Se102 | NSMCE4A_R83P                 |
| Se102 | LRRC32_I230N                 |
| Se102 | FLII_L64M                    |
| Se102 | GHDC_Q376H                   |
| Se102 | ZNF652_L538V                 |
| Se102 | APPBP2_L26V                  |

|       |                                                                                                                                            |
|-------|--------------------------------------------------------------------------------------------------------------------------------------------|
| Se102 | APPBP2_V25G                                                                                                                                |
| Se102 | HELZ_K500N                                                                                                                                 |
| Se102 | TMC6_R231P                                                                                                                                 |
| Se102 | BRD4_E345Q                                                                                                                                 |
| Se102 | RASAL3_R992L                                                                                                                               |
| Se102 | CHERP_R559Q                                                                                                                                |
| Se102 | CENPB_Q313H                                                                                                                                |
| Se102 | LMTK2_FLHSDLALRNCESGRLRNRIQQVQGGLY                                                                                                         |
| Se102 | SMO_EGCGIQCQNPLSTRCTATSRPSGSPRASARSSPWPWSWLTGGT<br>RIATLLFSSTSMRASLWAALAGWPSSWMVPAERSSAVQMAP                                               |
| Se103 | OBSCN_E4387K                                                                                                                               |
| Se103 | HIBCH_V158M                                                                                                                                |
| Se103 | DOCK1_D344N                                                                                                                                |
| Se103 | PPFIA1_V178M                                                                                                                               |
| Se103 | ZNF200_I334M                                                                                                                               |
| Se103 | TP53_V41L                                                                                                                                  |
| Se103 | SIRT2_G104V                                                                                                                                |
| Se104 | CPA1_A336T                                                                                                                                 |
| Se104 | LZTS2_G27R                                                                                                                                 |
| Se104 | KIAA0556_R1029H                                                                                                                            |
| Se104 | CLDN7_A94T                                                                                                                                 |
| Se104 | RRP1B_R476W                                                                                                                                |
| Se104 | ARMC7_AITLMLHLSPPDRHARGAVHASLLPLGQRQAPEPGTDLPGGL<br>LLPPPGRGPGPAGALCPGYPTAERGPTAALIHGDCETVAPLLETT<br>VLMWTQGTGSTYCPIGAFSAI                 |
| Se104 | BRD7_GEDGQCWQERGLWRCRSTRLOESQQRK                                                                                                           |
| Se105 | SLAMF7_P93S                                                                                                                                |
| Se105 | RBM34_V194F                                                                                                                                |
| Se105 | PTCD1_E36D                                                                                                                                 |
| Se105 | TSSK6_G121S                                                                                                                                |
| Se105 | SUPT5H_D310N                                                                                                                               |
| Se105 | CAPN6_V134L                                                                                                                                |
| Se105 | DERL1_RYWFAATVAVPWSANSASSARPTSSSGPKPSFIAFRFGGQSLP<br>PFISLWVQELDFFIWSIYISYISILRDLKQELLMGGQOTIYSCSSLTGFA<br>ZBTB7B_PCVIAACMEISAGOWARSSOPGRG |
| Se108 | ALG14_E85Q                                                                                                                                 |
| Se108 | POLR3C_S538C                                                                                                                               |
| Se108 | MNDA_F223L                                                                                                                                 |
| Se108 | EXO1_T396S                                                                                                                                 |
| Se108 | WDR35_G151V                                                                                                                                |
| Se108 | POLR1A_G130A                                                                                                                               |
| Se108 | CD8B_P108L                                                                                                                                 |
| Se108 | PTPN23_Q762H                                                                                                                               |
| Se108 | BCHE_E559G                                                                                                                                 |
| Se108 | FYTTD1_S84R                                                                                                                                |
| Se108 | C5orf34_F362S                                                                                                                              |
| Se108 | DDX56_R379W                                                                                                                                |
| Se108 | LAMB1_L421V                                                                                                                                |
| Se108 | DLC1_I141T                                                                                                                                 |
| Se108 | GOLGA2_S131P                                                                                                                               |
| Se108 | NUP214_V990I                                                                                                                               |
| Se108 | SEC61A2_G122V                                                                                                                              |
| Se108 | C10orf12_G594W                                                                                                                             |
| Se108 | ABLIM1_G43E                                                                                                                                |

|       |                                        |
|-------|----------------------------------------|
| Se108 | RGS10_S31T                             |
| Se108 | DCHS1_T156R                            |
| Se108 | DGKZ_R38W                              |
| Se108 | C2CD3_A1021G                           |
| Se108 | PLXNC1_A133P                           |
| Se108 | BRI3BP_A74S                            |
| Se108 | TRPM7_G317A                            |
| Se108 | SCAPER_V317I                           |
| Se108 | IL16_G277V                             |
| Se108 | WDR81_K495E                            |
| Se108 | PITPNM3_R669W                          |
| Se108 | BCAS3_I743V                            |
| Se108 | FOXS1_G315E                            |
| Se108 | NCOA6_A855S                            |
| Se108 | F8_P926T                               |
| Se108 | KNTC1_NLEKVWDMLEMAMPFNKTW              |
| Se108 | SLC30A6_FVLIDLAFAYMLIEINNYFA           |
| Se108 | RRP9_CDIPLVGFINSSGDFLVAGVGQ            |
| Se108 | HOOK3_NEALSAKEEIAHELDMQVAALQ           |
| Se109 | OBSCN_D2733N                           |
| Se109 | NUP35_P267R                            |
| Se109 | STK36_V1042I                           |
| Se109 | COL6A6_L174M                           |
| Se109 | TNIP1_P522R                            |
| Se109 | ZNF292_L2484P                          |
| Se109 | LACE1_G450R                            |
| Se109 | CRTC3_A32S                             |
| Se109 | CILP2_V645M                            |
| Se109 | GDI1_G220V                             |
| Se110 | KCNAB2_M106I                           |
| Se110 | ZP3_P22H                               |
| Se110 | ANK3_G167A                             |
| Se110 | ZBTB39_V87D                            |
| Se110 | PAK4_R203P                             |
| Se110 | RASA1_GDMFIVHNELEFKNR                  |
| Se111 | SASS6_L262F                            |
| Se111 | BOLA1_E41K                             |
| Se111 | POLE4_F74I                             |
| Se111 | PVRL3_M213V                            |
| Se111 | TNS3_G785V                             |
| Se111 | DNAJB5_F174S                           |
| Se111 | GBA2_L526V                             |
| Se111 | DIP2C_G1027V                           |
| Se111 | EPS8_S481N                             |
| Se111 | NOVA1_V197I                            |
| Se111 | ETFA_A25T                              |
| Se111 | RABEP1_L729F                           |
| Se111 | RTEL1_G516C                            |
| Se111 | RTEL1_G516V                            |
| Se111 | TP53_FRHSVVVPYEPLRLALTVPPSTTTTCVTPAWAA |
| Se111 | ATXN3_EDYRTFLQAAAAATAAAAAAAG           |
| Se111 | ATXN3_DSGFFSIQAAAAATAAAAAAAG           |
| Se112 | SCNN1D_S332T                           |
| Se112 | ACP6_M132I                             |

|       |                                                                          |
|-------|--------------------------------------------------------------------------|
| Se112 | SV2A_Q286H                                                               |
| Se112 | PRRX1_N219K                                                              |
| Se112 | ELK4_P409T                                                               |
| Se112 | MAPKAPK2_M314T                                                           |
| Se112 | RTKN_M131I                                                               |
| Se112 | LRRC15_L438P                                                             |
| Se112 | UVSSA_R683Q                                                              |
| Se112 | FBXO4_C330S                                                              |
| Se112 | CHD1_R547T                                                               |
| Se112 | PCDH12_R1175S                                                            |
| Se112 | ZNF354B_C466F                                                            |
| Se112 | PKN3_C606W                                                               |
| Se112 | SEC61A2_E210K                                                            |
| Se112 | ARL5B_V42L                                                               |
| Se112 | PLCE1_G1960R                                                             |
| Se112 | RCN1_H202R                                                               |
| Se112 | TMEM126B_L84F                                                            |
| Se112 | MAML2_Q672E                                                              |
| Se112 | MANSC1_C100S                                                             |
| Se112 | SPATS2_A275S                                                             |
| Se112 | SLC16A7_F346Y                                                            |
| Se112 | ANKRD13A_V34M                                                            |
| Se112 | ARID4A_N358T                                                             |
| Se112 | ZWILCH_L148F                                                             |
| Se112 | ZC3H18_R406W                                                             |
| Se112 | KDM6B_P528R                                                              |
| Se112 | FLCN_P404R                                                               |
| Se112 | TNFAIP1_F80V                                                             |
| Se112 | MYOM1_T395A                                                              |
| Se112 | UBA52_I61M                                                               |
| Se112 | PRR12_T1192M                                                             |
| Se112 | RANGAP1_L23R                                                             |
| Se112 | DDX3X_R183C                                                              |
| Se112 | RRAGB_N92K                                                               |
| Se112 | PNCK_H392D                                                               |
| Se112 | EPHA1_ARAKEVTLMDTRRAGLAAGSPKRWVE                                         |
| Se112 | GALT_WHGAPTGSEAGTIGSCTLITTLRSCALPLSGNSWLATKCLLRL<br>RGTSPLSRLQRD         |
| Se112 | IGF2R_QLNYRGGTPYNTHRELRSPPFSVIETREWASLNIRKRITPPTTS<br>GGTPAMPARRSPWNA    |
| Se112 | TP53_CSDSDGLAPPQLSEWKEICVWSIWMETLFDIVWWCPMSRLRL<br>ALTVPPSTTTTTCVTVPAWAA |
| Se112 | ZCWPW1_KSYSLLPCSPNPLRRRPRGSPVQRQRP                                       |
| Se112 | SRA1_MTRCQAEVEMAELYV                                                     |
| Se112 | TBC1D32_RTTVLRLLLETKSLVTTAIQQCV                                          |
| Se112 | RARG_PSQPYMFPRMLITDLRGISTKG                                              |
| Se113 | FMO4_G162R                                                               |
| Se113 | MBNL1_T6I                                                                |
| Se113 | PCDHGB6_R627C                                                            |
| Se113 | TRRAP_E660D                                                              |
| Se113 | NSMCE2_F17L                                                              |
| Se113 | ECHDC3_V247L                                                             |
| Se113 | ZNF664_H49Y                                                              |
| Se113 | TP53_R116W                                                               |

|       |                                                                                                                                           |
|-------|-------------------------------------------------------------------------------------------------------------------------------------------|
| Se113 | PPP6R1_R692G                                                                                                                              |
| Se113 | PPP1R3F_G278C                                                                                                                             |
| Se114 | NLRP3_S597N                                                                                                                               |
| Se114 | ARL6IP6_L130F                                                                                                                             |
| Se114 | PLA2R1_G922R                                                                                                                              |
| Se114 | SSFA2_H740R                                                                                                                               |
| Se114 | WDR5B_T297A                                                                                                                               |
| Se114 | DIRC2_L382W                                                                                                                               |
| Se114 | NSD1_W421C                                                                                                                                |
| Se114 | NEU1_S119I                                                                                                                                |
| Se114 | FBXO30_N285T                                                                                                                              |
| Se114 | BIRC3_G472A                                                                                                                               |
| Se114 | ALOX5AP_S108R                                                                                                                             |
| Se114 | TJP1_S404C                                                                                                                                |
| Se114 | DECR2_D12Y                                                                                                                                |
| Se114 | USP7_D428Y                                                                                                                                |
| Se114 | DYRK1B_A417T                                                                                                                              |
| Se114 | IRAK1_D52H                                                                                                                                |
| Se114 | APOBR_QTGSVAAGIMGVMWSHTSALLALVKLWKGCLGKAGTRKK<br>RKRQQQESMQVGKNLWVRAQQRKR                                                                 |
| Se114 | CCDC88B_WRVWNLNHLWGD                                                                                                                      |
| Se114 | EXD3_SQPPTGGAQASRTPLSPSWATGWWGTCKNWARPAPPWPM<br>WRSRFWAAWTCCWCTDRCGWRACQPQPWTGPGS                                                         |
| Se114 | EXD3_GAQAFSRLVAQPSRTPLSPSWATGWWGTCKNWARPAPPWPM<br>WRSRFWAAWTCCWCTDRCGWRACQPQPWTGPGS                                                       |
| Se114 | PPA2_NAKMEIATKEPICKGWKATLCGEYLPLQLYMELWYPPSDSFL<br>WRSYSCEDPWNGFSY                                                                        |
| Se114 | PHF3_RFTPVTEEDQIYTLFFAYFSSR                                                                                                               |
| Se115 | RAPH1_S913A                                                                                                                               |
| Se115 | ZNF142_L943S                                                                                                                              |
| Se115 | SEC62_F234V                                                                                                                               |
| Se115 | METTTL14_A62V                                                                                                                             |
| Se115 | CDCA2_K634R                                                                                                                               |
| Se115 | ADAMTSL2_P333T                                                                                                                            |
| Se115 | ADAMTSL4_K825N                                                                                                                            |
| Se115 | ADAMTSL4_Y826N                                                                                                                            |
| Se115 | ATP11A_A915V                                                                                                                              |
| Se115 | FASN_R1349W                                                                                                                               |
| Se115 | B3GNT3_H91Y                                                                                                                               |
| Se115 | KMT2B_S941C                                                                                                                               |
| Se115 | EML2_S185L                                                                                                                                |
| Se115 | SLC52A3_F129S                                                                                                                             |
| Se115 | ABHD8_SSASSDAAQGDPAAMGGCWWKTWAEPLPTSYPGRMALGSR<br>RPPWRWSWQIRRAAMAAWPPAAQAAAAAVAVVGGGGEGPAPRGPS<br>ILTVRASLAAPRPTWCSFSSMVSAPWPSGRSSWTSLCA |
| Se115 | AHNAK2_EKRLKKEQILTKGSGHQVQNAQVQDAIVRGVSPRQV<br>HGGLGGCVCAEGGRREPPLHAGGPQDH                                                                |
| Se115 | C1orf186_AVKEMKETQTETSQCLIPFTGMTATHPQIAWIAPAVRLLPA<br>RPQRMWITHKSSFLTEN                                                                   |
| Se115 | CCDC85C_DKLLAQAGSGVPHAAERLLALPLGVPACVPAALLPGLPA<br>ERPGLPRT                                                                               |
| Se115 | CRNKL1_LVLAWSSQFRRRPGRPAPQSLRRC                                                                                                           |
| Se115 | L3MBTL2_GYLMICVDGGPPQMAWTGSATMPLPTPSSRPPSVRRMTLS<br>SHRQKVMRHLSTGRTTWRPSPKPLHRDSLWIAQTMASRWA                                              |

|       |                                              |
|-------|----------------------------------------------|
| Se115 | SEMA3B_ENPDDDKIYFFRETAVEAAPAL                |
| Se115 | DOCK4_RHCSTKEKGEKLFGFSFVPLMQ                 |
| Se115 | FBXO32_ILSDKGOLDWKMYFKLVRCYPR                |
| Se115 | ZC3H12C_QYPSMMMATKNGTPMPYEQYPK               |
| Se115 | MMP14_LFWMPNGKTYFRGNKYRFNEE                  |
| Se116 | MXRA8_P160L                                  |
| Se116 | ZNF638_K1431N                                |
| Se116 | RBSN_L559V                                   |
| Se116 | EXOSC7_M239I                                 |
| Se116 | CACNA1D_L80V                                 |
| Se116 | ABI3BP_E427Q                                 |
| Se116 | GEMIN5_R718Q                                 |
| Se116 | DOCK2_M1388R                                 |
| Se116 | MDC1_M1316I                                  |
| Se116 | BAG6_Q289E                                   |
| Se116 | FGD2_R322C                                   |
| Se116 | RBAK_C266S                                   |
| Se116 | FBXL18_R501H                                 |
| Se116 | TRIM4_R170L                                  |
| Se116 | TRIB1_L42I                                   |
| Se116 | ZNF239_R44K                                  |
| Se116 | IGHMBP2_D754Y                                |
| Se116 | TAPBPL_R442H                                 |
| Se116 | SPRY2_R292H                                  |
| Se116 | NOP9_R290C                                   |
| Se116 | SYNE2_M5466I                                 |
| Se116 | ITGAE_I909T                                  |
| Se116 | TP53_R116W                                   |
| Se116 | MAPK7_P323S                                  |
| Se116 | KCNJ2_I269V                                  |
| Se116 | GDF15_R57Q                                   |
| Se116 | MOCS3_V189F                                  |
| Se116 | EGFR_SLNITSLGLRSSRR                          |
| Se116 | ITGA1_MSLEPIKOTCCYLGSTIHAQOKTKMSHAGLVLELQLLL |
| Se116 | ZNF679_LTFRDVVIEFSAEFI                       |
| Se116 | TJP2_KLFDQANKLKKNVCTPFYSYNQPKFSQ             |
| Se117 | PMF1_E198K                                   |
| Se117 | ATP2B2_P859T                                 |
| Se117 | CUL7_R1062Q                                  |
| Se117 | SLC17A5_F48L                                 |
| Se117 | UTRN_D1037V                                  |
| Se117 | TMEM140_A153V                                |
| Se117 | CLEC5A_E113V                                 |
| Se117 | TRPS1_S882F                                  |
| Se117 | PLEC_I3605L                                  |
| Se117 | GBA2_L550F                                   |
| Se117 | DHCR7_Q144E                                  |
| Se117 | TMPRSS13_L308Q                               |
| Se117 | EFTUD1_V487L                                 |
| Se117 | TP53_C9Y                                     |
| Se117 | FARSA_P347L                                  |
| Se117 | DYRK1A_A26G                                  |
| Se117 | PIM3_T86A                                    |
| Se117 | PDK3_R162H                                   |

|       |                                                                                                                                                                                                                                                           |
|-------|-----------------------------------------------------------------------------------------------------------------------------------------------------------------------------------------------------------------------------------------------------------|
| Se117 | EXOC8_TEQKSSLESIPPPPLEGRRESVGRGAETTSEARPAFSPPPGVPP<br>ATAPVQARKESSALSPCLRRWKAAGICWRRRDSTWCTMGT                                                                                                                                                            |
| Se117 | LMF2_FRRMTGLGGRPGGAGGQLRRPPLDGDRVHVQAWPEPEAAPG<br>CGAPPATPGLADVVCSPGPTHAPVVKPGLAPAAGQGASDPPCPEP<br>SGQVSLPQAAAHLRSPALQVLVLPWAGAGPVVAAPVGGGVLPPIRVP<br>GGPHAGDAAQAVWTTGEKPTSHPPQRQHPGPGPPLDSLAVSPGGPR<br>PALGAPHGRGGCOICASPASTLFSPLVLPAGTSQRGEAQASLPERLRSL |
| Se117 | RBM15_MRTAGREAACGSAV                                                                                                                                                                                                                                      |
| Se118 | PRKCZ_R73G                                                                                                                                                                                                                                                |
| Se118 | USP24_S2135T                                                                                                                                                                                                                                              |
| Se118 | ATP8B2_D1022N                                                                                                                                                                                                                                             |
| Se118 | ELK4_M405L                                                                                                                                                                                                                                                |
| Se118 | BIRC6_D1967H                                                                                                                                                                                                                                              |
| Se118 | GULP1_D103H                                                                                                                                                                                                                                               |
| Se118 | MYEOV2_K192Q                                                                                                                                                                                                                                              |
| Se118 | FBLN2_G707S                                                                                                                                                                                                                                               |
| Se118 | FRYL_S2582F                                                                                                                                                                                                                                               |
| Se118 | FRAS1_L1138F                                                                                                                                                                                                                                              |
| Se118 | FAT2_T843A                                                                                                                                                                                                                                                |
| Se118 | CD83_S48F                                                                                                                                                                                                                                                 |
| Se118 | BAK1_G4W                                                                                                                                                                                                                                                  |
| Se118 | FAM83B_E575G                                                                                                                                                                                                                                              |
| Se118 | TULP4_Y464F                                                                                                                                                                                                                                               |
| Se118 | C7orf60_D349A                                                                                                                                                                                                                                             |
| Se118 | SNTB1_H382N                                                                                                                                                                                                                                               |
| Se118 | SPTAN1_Q2124R                                                                                                                                                                                                                                             |
| Se118 | ABCA2_H1295L                                                                                                                                                                                                                                              |
| Se118 | CDHR1_K578M                                                                                                                                                                                                                                               |
| Se118 | MRPL43_R68C                                                                                                                                                                                                                                               |
| Se118 | SLC43A1_P183T                                                                                                                                                                                                                                             |
| Se118 | LGALS12_D11H                                                                                                                                                                                                                                              |
| Se118 | CYFIP1_Q378H                                                                                                                                                                                                                                              |
| Se118 | STRA6_A400S                                                                                                                                                                                                                                               |
| Se118 | ALDH1A3_V170M                                                                                                                                                                                                                                             |
| Se118 | GLYR1_R7W                                                                                                                                                                                                                                                 |
| Se118 | FBXL19_L74V                                                                                                                                                                                                                                               |
| Se118 | RILP_Q250H                                                                                                                                                                                                                                                |
| Se118 | PHF12_G938R                                                                                                                                                                                                                                               |
| Se118 | STARD3_W386C                                                                                                                                                                                                                                              |
| Se118 | CHERP_K879N                                                                                                                                                                                                                                               |
| Se118 | ATRN_H808R                                                                                                                                                                                                                                                |
| Se118 | PDGFC_FCIHYNIVMPQ                                                                                                                                                                                                                                         |
| Se118 | WNT7A_TFLKIKKPLSYGPGVHREVAQLLRGGPGDRQCCHPGPRLQQ<br>DGSPGQRL                                                                                                                                                                                               |
| Se118 | PLEKHG4_RDTFVLQASSLWRQAVHNKEVR                                                                                                                                                                                                                            |
| Se119 | ESPN_D689N                                                                                                                                                                                                                                                |
| Se119 | ZMYND10_N301H                                                                                                                                                                                                                                             |
| Se119 | UGT2B7_T503S                                                                                                                                                                                                                                              |
| Se119 | PCDHGC4_V368A                                                                                                                                                                                                                                             |
| Se119 | LRRC16A_G171V                                                                                                                                                                                                                                             |
| Se119 | GLTSCR1L_I166L                                                                                                                                                                                                                                            |
| Se119 | ZNF775_P275L                                                                                                                                                                                                                                              |
| Se119 | SEC31B_G122V                                                                                                                                                                                                                                              |
| Se119 | FRMD8_R152L                                                                                                                                                                                                                                               |

|       |                                                                                                                                         |
|-------|-----------------------------------------------------------------------------------------------------------------------------------------|
| Se119 | R3HDM2_M724I                                                                                                                            |
| Se119 | TBC1D15_M145I                                                                                                                           |
| Se119 | SEL1L_L9V                                                                                                                               |
| Se119 | CACNA1H_G712C                                                                                                                           |
| Se119 | ZNF574_K506E                                                                                                                            |
| Se119 | C20orf27_G178A                                                                                                                          |
| Se119 | KCNG1_A441V                                                                                                                             |
| Se119 | KCNG1_A441S                                                                                                                             |
| Se119 | PRDM15_S267I                                                                                                                            |
| Se119 | MAMSTR_TKSMLLERMARGASGRSRGARTVPRVLPGRASSPRWQPPG<br>VRARSSPAQHLTGHLFHVPRIPRGRRLRLQLPLRLLLQLQP                                            |
| Se120 | ALDH4A1_R10G                                                                                                                            |
| Se120 | ZZZ3_S367Y                                                                                                                              |
| Se120 | TANC1_A1036V                                                                                                                            |
| Se120 | ATG4B_R90P                                                                                                                              |
| Se120 | TTC33_R46H                                                                                                                              |
| Se120 | SKIV2L2_H810Y                                                                                                                           |
| Se120 | SLC35B2_F73L                                                                                                                            |
| Se120 | NOM1_C697Y                                                                                                                              |
| Se120 | KAT6A_V1188I                                                                                                                            |
| Se120 | SULF1_H182Y                                                                                                                             |
| Se120 | FAM175B_R282Q                                                                                                                           |
| Se120 | PIK3C2A_V528M                                                                                                                           |
| Se120 | NCAPD3_D1135G                                                                                                                           |
| Se120 | TIMELESS_R515Q                                                                                                                          |
| Se120 | FZD10_R443H                                                                                                                             |
| Se120 | NFATC4_P127L                                                                                                                            |
| Se120 | SPTB_P1197Q                                                                                                                             |
| Se120 | SHCBP1_S337C                                                                                                                            |
| Se120 | GPS2_D107H                                                                                                                              |
| Se120 | NF1_T1951S                                                                                                                              |
| Se120 | PCTP_F104L                                                                                                                              |
| Se120 | RGS9_S554N                                                                                                                              |
| Se120 | SIGLEC15_S178I                                                                                                                          |
| Se120 | ZNF837_E461V                                                                                                                            |
| Se120 | MYH7B_Y175N                                                                                                                             |
| Se120 | RPN2_G57V                                                                                                                               |
| Se120 | INPP5A_ESTPMLEKEKFRRTTSPSANGQEKASSGRGGALQTVPLTW<br>LPIN1_LKRSHTSDFPVRIPSVTSPFGESHCHLLKTRTFILPQRKMSQA<br>ASCQQCRAWLSPIKG                 |
| Se120 | ZNF574_PALQQEVQASSLQRCLCLSLTPCQLLTTVTSCAMVKPLGGIA<br>GGAGPGGTTVEKQAGQPHRSSSAQPVTSSFSHPTSYSSTCGVTGRASL<br>SAPCAVVSSLALPVWTSTLETIAASHTSCV |
| Se121 | GNL2_R355P                                                                                                                              |
| Se121 | SLC44A5_R351Q                                                                                                                           |
| Se121 | ITSN2_D614H                                                                                                                             |
| Se121 | HARS_N120T                                                                                                                              |
| Se121 | PCDHGA6_D426H                                                                                                                           |
| Se121 | ZSCAN16_K318I                                                                                                                           |
| Se121 | ATF6B_L119H                                                                                                                             |
| Se121 | KMT2C_A1590T                                                                                                                            |
| Se121 | HAUS6_S484T                                                                                                                             |
| Se121 | CELF2_G40R                                                                                                                              |
| Se121 | PARBPBP_L393F                                                                                                                           |

|       |                                                    |
|-------|----------------------------------------------------|
| Se121 | PLCB2_R762H                                        |
| Se121 | ANKFY1_D284H                                       |
| Se121 | TP53_H61R                                          |
| Se121 | CYP1B1_NVPATITDIFRAPARTPCPPRCSGCSSSSPGILMCRLECRQNW |
| Se121 | IRS                                                |
| Se121 | WGGTVCLVWVTSPTCPMSWPSFMKPCASPALCLSLFLMPPLPTPLSW    |
| Se121 | ZFYVE19_RGGTVPVGVWGRAGQGREGKGGAGVRVQGAQDLAGVIS     |
| Se121 | ALQ                                                |
| Se122 | ACSL1_M291V                                        |
| Se122 | SLC35A4_G72A                                       |
| Se122 | CDK14_D226G                                        |
| Se122 | AQP3_A44V                                          |
| Se122 | VAV2_P617L                                         |
| Se122 | PIK3C2A_L435I                                      |
| Se122 | ZNF646_Q349H                                       |
| Se122 | PPP4R1_S648T                                       |
| Se122 | KLK8_R106H                                         |
| Se122 | ATM_SLLLKDIKSGLVLRDVIYTLIH                         |
| Se123 | GPR153_H129Q                                       |
| Se123 | EIF3I_K17M                                         |
| Se123 | DHCR24_M476R                                       |
| Se123 | GBP4_D347E                                         |
| Se123 | TGFBR3_E442D                                       |
| Se123 | OTUD7B_F359Y                                       |
| Se123 | ARNT_P286L                                         |
| Se123 | TMEM63A_F210V                                      |
| Se123 | RAB10_Q68E                                         |
| Se123 | DNAJC10_V532L                                      |
| Se123 | NEMP2_N90T                                         |
| Se123 | BARD1_Q430E                                        |
| Se123 | ROBO2_L50M                                         |
| Se123 | NSUN7_C476F                                        |
| Se123 | SLC10A7_P27T                                       |
| Se123 | ELL2_MIL                                           |
| Se123 | MCC_I388M                                          |
| Se123 | MLLT4_Q806H                                        |
| Se123 | C7orf26_L21W                                       |
| Se123 | AGR3_P124R                                         |
| Se123 | VPS13B_K867I                                       |
| Se123 | PLEC_Q1420H                                        |
| Se123 | C10orf128_V109L                                    |
| Se123 | LZTS2_R479W                                        |
| Se123 | B4GALNT4_P714A                                     |
| Se123 | EEF1G_D393H                                        |
| Se123 | B4GAT1_I197S                                       |
| Se123 | NUMA1_A1289G                                       |
| Se123 | PEX5_R105T                                         |
| Se123 | CDKN1B_V36L                                        |
| Se123 | ATF7IP_R1041C                                      |
| Se123 | NUP107_H545Y                                       |
| Se123 | KIAA1033_T572A                                     |
| Se123 | TRPV4_Q683P                                        |
| Se123 | PYGL_S775L                                         |
| Se123 | DACT1_M245L                                        |

|       |                                                                                       |
|-------|---------------------------------------------------------------------------------------|
| Se123 | CCDC88C_N48K                                                                          |
| Se123 | TMEM121_P218T                                                                         |
| Se123 | ATMIN_K153N                                                                           |
| Se123 | DPEP1_E327Q                                                                           |
| Se123 | AOC3_I363M                                                                            |
| Se123 | GPATCH8_E312Q                                                                         |
| Se123 | LRFN3_G125V                                                                           |
| Se123 | GSS_R132C                                                                             |
| Se123 | PIGT_L269V                                                                            |
| Se123 | DOPEY2_A1412T                                                                         |
| Se123 | PACSIN2_V9L                                                                           |
| Se123 | ADAMTSL4_GSQRCELNCRPLASASMSVTLKRSRMGPCVSLEPLTSV<br>WLDVAV                             |
| Se123 | SYK_SRIKSYFPPKATESPPLPKGTGKRVLCHSIRMSQNLHPGLQTKA<br>PREKPYPTQRCTRAPTRTPRRSGPRRFTWTESC |
| Se123 | COL6A6_EQYVSKLKTFAAHNQTFLLKLR                                                         |
| Se124 | TP73_H17Q                                                                             |
| Se124 | FAM69A_V45A                                                                           |
| Se124 | PRCC_F388Y                                                                            |
| Se124 | KIF14_I609V                                                                           |
| Se124 | WDR26_P589T                                                                           |
| Se124 | HEATR1_E741Q                                                                          |
| Se124 | CAP2_M405I                                                                            |
| Se124 | TIAM2_S604R                                                                           |
| Se124 | RSBN1L_S21L                                                                           |
| Se124 | PREX2_D1142E                                                                          |
| Se124 | VSTM4_S143Y                                                                           |
| Se124 | MGEA5_S19Y                                                                            |
| Se124 | UROS_A191T                                                                            |
| Se124 | ANKRD52_D869H                                                                         |
| Se124 | TP53_C145F                                                                            |
| Se124 | SMCR8_A237V                                                                           |
| Se124 | ITGB4_G1383D                                                                          |
| Se124 | GAREM1_R376G                                                                          |
| Se124 | TPGS1_V122M                                                                           |
| Se124 | NLRP7_KPVPVLLGSLLNAAQGTGPPAPGAAADLRKGGGLPGGGQE<br>GLFPETLWRRGPHACL                    |
| Se125 | ASAP3_A668S                                                                           |
| Se125 | BCAS2_R72T                                                                            |
| Se125 | CRIM1_C284Y                                                                           |
| Se125 | STEAP3_R126H                                                                          |
| Se125 | GOLGA4_E1853Q                                                                         |
| Se125 | XYLB_G235S                                                                            |
| Se125 | FLNB_A1218S                                                                           |
| Se125 | XRN1_L662M                                                                            |
| Se125 | RAP1GDS1_E269Q                                                                        |
| Se125 | DCDC2_R7M                                                                             |
| Se125 | FZD3_D640G                                                                            |
| Se125 | GRHL2_K118N                                                                           |
| Se125 | CNTLN_K1289R                                                                          |
| Se125 | RABL6_P170A                                                                           |
| Se125 | DEAF1_L129M                                                                           |
| Se125 | OTUB1_E5V                                                                             |
| Se125 | CLEC7A_Q152K                                                                          |

|       |                                                                                                                                |
|-------|--------------------------------------------------------------------------------------------------------------------------------|
| Se125 | GALC_G355V                                                                                                                     |
| Se125 | HERC1_A4494V                                                                                                                   |
| Se125 | CHTF18_V577M                                                                                                                   |
| Se125 | MTSS1L_R84C                                                                                                                    |
| Se125 | MYH10_S1922T                                                                                                                   |
| Se125 | MED25_G298W                                                                                                                    |
| Se125 | ZFP64_F317L                                                                                                                    |
| Se125 | SGSM3_L254V                                                                                                                    |
| Se125 | DOCK11_H1078Q                                                                                                                  |
| Se125 | CTSA_PLFLLLLLLLLVSWASRGEAAP                                                                                                    |
| Se126 | EHBPI_N218K                                                                                                                    |
| Se126 | ERBB4_C520W                                                                                                                    |
| Se126 | FAM149A_K201E                                                                                                                  |
| Se126 | SCRIB_G1424R                                                                                                                   |
| Se126 | MAP1LC3B2_E14V                                                                                                                 |
| Se126 | ZC3H14_A384T                                                                                                                   |
| Se126 | RPAP1_R1289W                                                                                                                   |
| Se126 | ITGB4_E853D                                                                                                                    |
| Se126 | SPEF1_G123S                                                                                                                    |
| Se126 | BORA_GKFRWSIDQLAE                                                                                                              |
| Se126 | SYNGAP1_SNLDTLTNSSLGRELSTLHAL                                                                                                  |
| Se127 | LEPR_D475A                                                                                                                     |
| Se127 | LEPR_N1126Y                                                                                                                    |
| Se127 | PIK3C2B_V923I                                                                                                                  |
| Se127 | SEC61A1_I129V                                                                                                                  |
| Se127 | UHRF1BP1_D474Y                                                                                                                 |
| Se127 | FBXO10_V29L                                                                                                                    |
| Se127 | SYT7_N135Y                                                                                                                     |
| Se127 | USP5_S39C                                                                                                                      |
| Se127 | ZFYVE26_D1470N                                                                                                                 |
| Se127 | CTCF_L398T                                                                                                                     |
| Se127 | ATP13A2_TGVQLGGYFLTPTWVPLNRTV                                                                                                  |
| Se128 | AGRN_G741E                                                                                                                     |
| Se128 | ZBTB40_V972M                                                                                                                   |
| Se128 | PDE4B_E263K                                                                                                                    |
| Se128 | POLQ_D549N                                                                                                                     |
| Se128 | AHR_Y468C                                                                                                                      |
| Se128 | TRRAP_W3205S                                                                                                                   |
| Se128 | KIAA1549_Q1487H                                                                                                                |
| Se128 | KRAS_G12R                                                                                                                      |
| Se128 | BRI3BP_H151Y                                                                                                                   |
| Se128 | PIK3R5_D76N                                                                                                                    |
| Se128 | RIPK4_G615V                                                                                                                    |
| Se128 | NHSL2_A523T                                                                                                                    |
| Se128 | LAGE3_R143H                                                                                                                    |
| Se128 | SIPA1_SEDKGNPAPELSLCGTPSAGSCRRRAVGPWRTSGRPSRRLPLL<br>ATPFWSRCPERDSPSQRVETLRELQNLMLSQSLGTSQRRSLTWSPCSG<br>SCRRTCRRRRRTGRPWRRCGA |
| Se129 | SPEN_S1424N                                                                                                                    |
| Se129 | PQLC2_S126P                                                                                                                    |
| Se129 | MEF2D_R15Q                                                                                                                     |
| Se129 | NID1_P557S                                                                                                                     |
| Se129 | BIRC6_V3258G                                                                                                                   |
| Se129 | UBXN4_A99S                                                                                                                     |

|       |                                                  |
|-------|--------------------------------------------------|
| Se129 | TAMM41_T162I                                     |
| Se129 | RAD54L2_S385Y                                    |
| Se129 | FAM208A_T1150A                                   |
| Se129 | PBX3_R304H                                       |
| Se129 | ARHGAP21_T1114I                                  |
| Se129 | TOLLIP_P220L                                     |
| Se129 | ITPR2_R1547H                                     |
| Se129 | DIAPH3_P16H                                      |
| Se129 | EIF2AK4_M149V                                    |
| Se129 | ZNF521_V354I                                     |
| Se129 | THOP1_H391Y                                      |
| Se129 | ATP13A1_D541Y                                    |
| Se129 | FOXA3_R160H                                      |
| Se129 | ZMYND8_T230M                                     |
| Se129 | CLCN5_R563C                                      |
| Se129 | AFDN_PDHIPKTKKHWKARHPRERRELTGLAMAPPFLRRSCPI      |
| Se129 | ZNF585B_DFSREEWRHLDLRETCTGM                      |
| Se130 | GPR161_A141T                                     |
| Se130 | EPCAM_V6I                                        |
| Se130 | FLNB_G972V                                       |
| Se130 | SORCS2_T893K                                     |
| Se130 | TBC1D1_K787M                                     |
| Se130 | KIAA0922_G973V                                   |
| Se130 | ZNF391_K200I                                     |
| Se130 | C2_L126P                                         |
| Se130 | IGF2R_T1015S                                     |
| Se130 | ORC5_L351P                                       |
| Se130 | PUF60_V333I                                      |
| Se130 | AQP3_Y104C                                       |
| Se130 | RASSF4_L28V                                      |
| Se130 | SBF2_I1318V                                      |
| Se130 | APLP2_E49V                                       |
| Se130 | PLEKHG6_E244Q                                    |
| Se130 | ORMDL2_A121S                                     |
| Se130 | ZDHC17_Y223S                                     |
| Se130 | RNF213_S4922R                                    |
| Se130 | NPLOC4_D111H                                     |
| Se130 | ANKRD27_H754R                                    |
| Se130 | ZNF671_R408W                                     |
| Se130 | PABPCIL_P457T                                    |
| Se130 | LAMA5_E2916D                                     |
| Se130 | IL17RA_D538A                                     |
| Se130 | SNAP29_L31F                                      |
| Se130 | TMLHE_S88F                                       |
| Se130 | DTX3L_VHFVNLQESMTDWFAPKSPCKGEAVCSKRRRNVFIGWKEIER |
| Se130 | TRERF1_IFVQKMVKSKTWLSAWSTTTTRGKRSCGWGGNTGHAHQKS  |
| Se130 | KIRREL_PPGPAAPAGTDENYEKFNHPF                     |
| Se130 | YIPF5_PYTGQIQPTQPFYGNFDEP                        |
| Se131 | CACHD1_R150Q                                     |
| Se131 | C1D_T73S                                         |
| Se131 | PDE1A_V219F                                      |
| Se131 | ENTPD4_A160S                                     |
| Se131 | DEAF1_P204L                                      |
| Se131 | QSER1_T1248I                                     |

|       |                                                  |
|-------|--------------------------------------------------|
| Se131 | UTP20_R1043W                                     |
| Se131 | UBAC2_R90K                                       |
| Se131 | TM9SF1_G453V                                     |
| Se131 | AP4E1_D965N                                      |
| Se131 | VPS13C_E2692A                                    |
| Se131 | IGDCC4_N1145K                                    |
| Se131 | TMEM208_F118L                                    |
| Se131 | SCRN2_S288R                                      |
| Se131 | CACNG4_V303M                                     |
| Se131 | NFATC1_R108S                                     |
| Se131 | TEF_K177M                                        |
| Se131 | MDN1_ITMEIVNKLEAATQQ                             |
| Se131 | ZNF467_ALGATVDAPAAAAQDPIPWCPSAPPRASGPSSARTAGAASP |
| Se131 | MGSTWRGTRACTRANGPSPARSVTAASARGLIWSPTPGPTAAPGLSP  |
| Se131 | ALSAAAASAASRTWAATTRRCTLAAAPTAPAPSAPAASAPKPT      |
| Se132 | UBR4_R2974H                                      |
| Se132 | DNTTIP2_L252I                                    |
| Se132 | TOMM40L_L73F                                     |
| Se132 | RGS16_D153H                                      |
| Se132 | C1orf106_G299S                                   |
| Se132 | ATP2B4_L1002V                                    |
| Se132 | PLXNA2_V1183G                                    |
| Se132 | ROCK2_C1257F                                     |
| Se132 | BIRC6_I2111M                                     |
| Se132 | TMEM131_F632L                                    |
| Se132 | REV1_G58A                                        |
| Se132 | SH3RF3_R535L                                     |
| Se132 | SLC6A6_C112W                                     |
| Se132 | MITF_A57T                                        |
| Se132 | ABTB1_I38F                                       |
| Se132 | HPS3_D135H                                       |
| Se132 | WWTR1_S5P                                        |
| Se132 | CHRD_D67N                                        |
| Se132 | CENPC_M647I                                      |
| Se132 | TMEM192_L178V                                    |
| Se132 | IL6ST_M804I                                      |
| Se132 | GRAMD3_M238T                                     |
| Se132 | GRPEL2_R208H                                     |
| Se132 | NEDD9_G116V                                      |
| Se132 | ITPR3_F994L                                      |
| Se132 | DST_V3858F                                       |
| Se132 | LACE1_F188L                                      |
| Se132 | MDH2_A202G                                       |
| Se132 | ARPC1B_D130H                                     |
| Se132 | KMT2E_G1134R                                     |
| Se132 | MAK16_L91M                                       |
| Se132 | CHD7_M7I                                         |
| Se132 | VPS13B_A3424S                                    |
| Se132 | GRHL2_F23L                                       |
| Se132 | ENPP2_R203W                                      |
| Se132 | TRIM14_V326F                                     |
| Se132 | ZFAND4_G621R                                     |
| Se132 | PITPNM1_S318L                                    |
| Se132 | NUDT4_C96F                                       |

|       |                                                                                      |
|-------|--------------------------------------------------------------------------------------|
| Se132 | GNPTAB_I354N                                                                         |
| Se132 | CENPJ_A1183T                                                                         |
| Se132 | HSPH1_G266A                                                                          |
| Se132 | PCDH17_W12R                                                                          |
| Se132 | TBC1D4_M992I                                                                         |
| Se132 | ABCC4_I311M                                                                          |
| Se132 | LAMP1_L240V                                                                          |
| Se132 | AKAP6_V1408L                                                                         |
| Se132 | ATG2B_T1944R                                                                         |
| Se132 | PLA2G4F_H246N                                                                        |
| Se132 | HAUS2_S194C                                                                          |
| Se132 | LCMT2_L279V                                                                          |
| Se132 | TMEM8A_V123I                                                                         |
| Se132 | COG7_R470K                                                                           |
| Se132 | CMTR2_L708F                                                                          |
| Se132 | TP53_C3W                                                                             |
| Se132 | FAM83G_G665V                                                                         |
| Se132 | PIGW_E21K                                                                            |
| Se132 | MIF4GD_P128L                                                                         |
| Se132 | LDLR_A603T                                                                           |
| Se132 | NCCRP1_G238R                                                                         |
| Se132 | C20orf194_V215I                                                                      |
| Se132 | C20orf24_D37H                                                                        |
| Se132 | NDRG3_L272F                                                                          |
| Se132 | USP16_P586A                                                                          |
| Se132 | DOPEY2_E1559Q                                                                        |
| Se132 | HLCS_I648V                                                                           |
| Se132 | NUP62CL_T24M                                                                         |
| Se132 | CXorf40B_YAGFVLNGIKTGDALASSAEQPAELYHRRPHCSQGLGRRCLSGAAGGETRDDSCSDSGLAQERGKVWSRSDSGTR |
| Se132 | TDRD5_TKDGLSPOELEEYLLMVGNHLP                                                         |
| Se132 | DCLK2_LKQISAHGRSSNVNGGPELDRC                                                         |
| Se132 | LMBR1_NLYPAVMVLLIETSISVLLVA                                                          |
| Se132 | B3GAT3_LAYFLVSIAGLYALVOLGQPCD                                                        |
| Se132 | ZFPM1_CEITFSNVNNYVHKRLYCSGRR                                                         |
| Se132 | TK1_QILOQSPANS GTCEGRPLPSCHCRL LDAALHAAQPLQEEVGRRG                                   |
| Se133 | NAV1_R284W                                                                           |
| Se133 | TRAPPC12_G342S                                                                       |
| Se133 | SMC6_S1068F                                                                          |
| Se133 | CRIM1_D158H                                                                          |
| Se133 | DNAH1_R4096H                                                                         |
| Se133 | SIPA1_R1007Q                                                                         |
| Se133 | CTAGE5_K236M                                                                         |
| Se133 | EMC8_E97K                                                                            |
| Se133 | TP53_R141C                                                                           |
| Se133 | MAN2B1_R190H                                                                         |
| Se133 | COLGALT1_R453W                                                                       |
| Se133 | RALGAPA2_V691M                                                                       |
| Se133 | GRHL2_KNRDEQLKYWKSGTLGSIRRSRGLTLPITRRALIRLET LKRLHIMLFPLPGT                          |
| Se133 | PLAT_HPWQAAIFAKHGSCAGAYSSAPAGFSLPPTASRRGFRPTT                                        |
| Se133 | WSB1_DGALLATASYDIEYISGIHIMETF                                                        |
| Se134 | ATPIA2_Q703H                                                                         |
| Se134 | ATPIA2_V924M                                                                         |

|       |                            |
|-------|----------------------------|
| Se134 | CDC73_G22A                 |
| Se134 | RBKS_C241F                 |
| Se134 | SNRNP200_Q1568P            |
| Se134 | PMS1_L561P                 |
| Se134 | VGLL3_K44M                 |
| Se134 | EPHB3_P400R                |
| Se134 | TBC1D19_D77N               |
| Se134 | PCDHGB6_S475R              |
| Se134 | FAT2_Q1520R                |
| Se134 | RREB1_V1284L               |
| Se134 | FAM160B2_G439R             |
| Se134 | HNRNPK_G248V               |
| Se134 | ENG_F290L                  |
| Se134 | FAM208B_R2080T             |
| Se134 | ITGA8_V718M                |
| Se134 | LRRC20_F59V                |
| Se134 | HARBI1_P194L               |
| Se134 | EHBP1L1_I62N               |
| Se134 | SPTBN2_F1913L              |
| Se134 | SLC38A2_Q36L               |
| Se134 | DDX23_E334Q                |
| Se134 | TMEM263_G92R               |
| Se134 | RALGAP1_G1583R             |
| Se134 | DDHD1_P663A                |
| Se134 | RTN1_R513W                 |
| Se134 | BRF1_E131Q                 |
| Se134 | TBC1D24_L325V              |
| Se134 | IGSF6_A121V                |
| Se134 | TP53_R148S                 |
| Se134 | MAP2K7_V180M               |
| Se134 | MICAL3_W1001L              |
| Se134 | TMX2_IVMMKNRRSITGATYRQHFHV |
| Se134 | TPRN_KLPYLPHPARPGVAELQPRGS |
| Se135 | VPS13D_T1011S              |
| Se135 | B4GALT3_A133T              |
| Se135 | NBAS_S1994F                |
| Se135 | NAGK_G38R                  |
| Se135 | SCRN3_N410K                |
| Se135 | DZIP3_R1000G               |
| Se135 | FGFR3_N191I                |
| Se135 | ALDH7A1_L26R               |
| Se135 | TMEM170B_K2M               |
| Se135 | PUS7_M403I                 |
| Se135 | FAM171A1_A370V             |
| Se135 | LATS2_C400Y                |
| Se135 | RHBDF2_L721V               |
| Se135 | CILP2_V513L                |
| Se135 | RYR1_K965N                 |
| Se135 | FKRP_R154H                 |
| Se135 | IFNAR1_A406P               |
| Se135 | TIMM8A_A9V                 |
| Se135 | IL13RA2_G47D               |
| Se135 | DNASE1L1_P67A              |

|       |                                                                      |
|-------|----------------------------------------------------------------------|
| Se135 | CRISPLD1_PVDKRRKTYIASQKVYRILQEERHSECLLLCETEYLEEDHK<br>DYSKCNISEFCIKL |
| Se135 | ZNF232_HRRIHSGEKPFGLMDGAQSSLDIGEFMPEKSLPIELKGRTP<br>DRILHRSNLL       |
| Se136 | STAT1_E500K                                                          |
| Se136 | LARS2_W455C                                                          |
| Se136 | CACNA1D_R631K                                                        |
| Se136 | ABCC10_T651I                                                         |
| Se136 | ESR1_L536P                                                           |
| Se136 | CREB3L2_T506K                                                        |
| Se136 | OSBPL5_T465A                                                         |
| Se136 | ZDHC13_V390D                                                         |
| Se136 | ACOT1_T202M                                                          |
| Se136 | MAP2K3_T10I                                                          |
| Se136 | ELF4_V247A                                                           |
| Se136 | AFDN_KGAKEIILDDDDVLYKSSGNGQVTKGF                                     |
| Se137 | IPO13_V774F                                                          |
| Se137 | AGL_R404T                                                            |
| Se137 | OTUD7B_P78T                                                          |
| Se137 | CD84_N36T                                                            |
| Se137 | OBSCN_T4372I                                                         |
| Se137 | PQLC3_V90L                                                           |
| Se137 | LRP2_S608G                                                           |
| Se137 | HOXD8_K14N                                                           |
| Se137 | SLC25A38_Q236E                                                       |
| Se137 | PRICKLE2_M236I                                                       |
| Se137 | TXK_T196R                                                            |
| Se137 | PCDHA4_A731T                                                         |
| Se137 | RGL2_D361N                                                           |
| Se137 | WDR60_S758L                                                          |
| Se137 | SNAI2_S30Y                                                           |
| Se137 | TMEM67_V701A                                                         |
| Se137 | KCNQ3_E5G                                                            |
| Se137 | WISP1_P163L                                                          |
| Se137 | ENG_Y612S                                                            |
| Se137 | NAIF1_A42T                                                           |
| Se137 | SETX_R2340Q                                                          |
| Se137 | RALGDS_Y813C                                                         |
| Se137 | PDZD8_R936M                                                          |
| Se137 | CNIH1_I29V                                                           |
| Se137 | LOC81691_E560A                                                       |
| Se137 | IRX5_A279S                                                           |
| Se137 | NLRP1_A126V                                                          |
| Se137 | COLEC12_T230K                                                        |
| Se137 | IER2_N173K                                                           |
| Se137 | PEPD_S160N                                                           |
| Se137 | ANGPT4_K102N                                                         |
| Se137 | TNRC6B_E637G                                                         |
| Se137 | BRWD3_W297R                                                          |
| Se137 | USP13_NSKIFLDLDTDYEYEDEAKLVI                                         |
| Se138 | UBE4B_A234T                                                          |
| Se138 | AGL_K969I                                                            |
| Se138 | ILDR2_C231Y                                                          |
| Se138 | ASPM_H262L                                                           |

|       |                                                  |
|-------|--------------------------------------------------|
| Se138 | AKT3_G231C                                       |
| Se138 | SLC1A4_G59A                                      |
| Se138 | NRP2_R428W                                       |
| Se138 | PASK_C925Y                                       |
| Se138 | DBR1_S466C                                       |
| Se138 | CEP70_D396E                                      |
| Se138 | TNIK_L915R                                       |
| Se138 | EVC2_T1036S                                      |
| Se138 | MAN2B2_G345R                                     |
| Se138 | CPEB2_G786C                                      |
| Se138 | N4BP2_A1640S                                     |
| Se138 | C7_G821S                                         |
| Se138 | CCDC125_S103L                                    |
| Se138 | CAP2_F130I                                       |
| Se138 | BRD2_D511V                                       |
| Se138 | SYNGAP1_A351D                                    |
| Se138 | KCNQ5_W180L                                      |
| Se138 | ADAP1_R131Q                                      |
| Se138 | HIP1_S582T                                       |
| Se138 | FBXL13_Q609H                                     |
| Se138 | ZYX_V484A                                        |
| Se138 | ADAM9_W724C                                      |
| Se138 | CUBN_G1739A                                      |
| Se138 | MMRN2_V239G                                      |
| Se138 | DYRK4_F175I                                      |
| Se138 | RAB3IP_T128I                                     |
| Se138 | ATP8A2_S595P                                     |
| Se138 | KCNRG_V112I                                      |
| Se138 | SUPT16H_F687I                                    |
| Se138 | ARRDC4_L397V                                     |
| Se138 | MVP_D355E                                        |
| Se138 | TLDC1_A334S                                      |
| Se138 | LIG1_A724D                                       |
| Se138 | C20orf194_G1133S                                 |
| Se138 | EPPK1_IKVAAIRGEVTCSTPGSSIRRPCTHFVWGGLGDRHSARWSV  |
| Se138 | GALNT11_AYSSSPVVRGGSTGDCTSNGILSPFLS              |
| Se138 | PANK1_GDQ GKAGGGSPAGGARGSPIPRPGLACSRPAPWGRRAGGRA |
| Se138 | QRRWGSRQEEGRSAGFAIPRRRLCGC                       |
| Se138 | TGFBRAP1_ENPVSGDPFCVKRRTIQMFLVY                  |
| Se138 | REST_PVQVEPPPPMEIRPAPDEPVQM                      |
| Se138 | RAB11FIP1_TQSSSEPSVFSLSPIAAPIST                  |
| Se138 | FAM155B_AAAL TICCCCCWAPRPSDKPCA                  |
| Se139 | CADM3_Y71S                                       |
| Se139 | BMPR2_S704C                                      |
| Se139 | DIS3L2_R794H                                     |
| Se139 | MLPH_S444C                                       |
| Se139 | TACC3_P353R                                      |
| Se139 | RBM47_S6Y                                        |
| Se139 | SLC4A4_L625W                                     |
| Se139 | ZNF827_V920M                                     |
| Se139 | SPRY4_V129L                                      |
| Se139 | FAM65B_P4A                                       |
| Se139 | ARID1B_A1870P                                    |
| Se139 | SDK1_D1174V                                      |

|       |                                                    |
|-------|----------------------------------------------------|
| Se139 | CDK13_R860G                                        |
| Se139 | CACNA2D1_N154D                                     |
| Se139 | TMEM67_P7L                                         |
| Se139 | RECQL4_R766G                                       |
| Se139 | EIF3A_F184S                                        |
| Se139 | TECPR2_E356A                                       |
| Se139 | MLST8_W274R                                        |
| Se139 | PKMYT1_L277M                                       |
| Se139 | RANBP10_D492N                                      |
| Se139 | TP53_Y87H                                          |
| Se139 | DSC2_P139L                                         |
| Se139 | PARD6G_P249R                                       |
| Se139 | AP3D1_D146G                                        |
| Se139 | JSRP1_L143P                                        |
| Se139 | FZR1_Q218H                                         |
| Se139 | CACTIN_S67T                                        |
| Se139 | PTPRS_M16I                                         |
| Se139 | DNM2_E588D                                         |
| Se139 | TMED1_Y47H                                         |
| Se139 | SIX5_A117V                                         |
| Se139 | AP2A1_G202S                                        |
| Se139 | ATF5_R280L                                         |
| Se139 | SIGLEC1_R376W                                      |
| Se139 | CTNNB1_G523V                                       |
| Se139 | HMGB3_S42F                                         |
| Se139 | BRD7_GEDGQCWQERERGLWRCRSTRLOESQQRK                 |
| Se139 | SKIV2L2_DDRGIVILMVDGKQLLKGSADP                     |
| Se139 | ZNF311_ALCRHKKTHSGAFKTRNRLCMH                      |
| Se139 | RNF26_CLCQACTEILMRHPVYHRNCP LCRRGILQTLNVYLLSLLPCLP |
| Se139 | TPPCSTOALTGQH                                      |
| Se140 | KCNK2_I99R                                         |
| Se140 | UBR3_M405V                                         |
| Se140 | DIS3L2_H81R                                        |
| Se140 | CRBN_Q172K                                         |
| Se140 | KMT2E_S780N                                        |
| Se140 | TNPO3_V473I                                        |
| Se140 | SLC25A29_E116K                                     |
| Se140 | SMG1_C2738R                                        |
| Se140 | CNOT1_R1678C                                       |
| Se140 | TP53_P19S                                          |
| Se140 | CASKIN2_P980L                                      |
| Se140 | ELL_N530S                                          |
| Se140 | LARP1_YEIDDRDVNKISLSPRHHITCAGTQGGTAQATTPRVPR       |
| Se140 | NF1_CISGFSKSSIEPLFGIHDSMAVKSSSFLQA                 |
| Se140 | USP19_VNLGNTCFMNSHSVSVQHSCTPGLLP                   |
| Se141 | INADL_T545N                                        |
| Se141 | LRRRC8C_Y126F                                      |
| Se141 | TROVE2_A494S                                       |
| Se141 | HEATR1_Q247E                                       |
| Se141 | TGFBRAP1_E108D                                     |
| Se141 | CNTN3_D561G                                        |
| Se141 | DNAJC13_K1359R                                     |
| Se141 | GRSF1_C11W                                         |
| Se141 | FKBP5_L217S                                        |

|       |                                                                  |
|-------|------------------------------------------------------------------|
| Se141 | STK17A_T244A                                                     |
| Se141 | PLPP6_I183M                                                      |
| Se141 | TEK_S41C                                                         |
| Se141 | WNK2_D2293E                                                      |
| Se141 | RIC8A_P360T                                                      |
| Se141 | MRVII_A296D                                                      |
| Se141 | NCKAPIL_Y88F                                                     |
| Se141 | SACS_N605S                                                       |
| Se141 | GPATCH2L_S452C                                                   |
| Se141 | SEL1L_R600T                                                      |
| Se141 | XRCC3_R81L                                                       |
| Se141 | IGF1R_R1337H                                                     |
| Se141 | GRIN2A_V820I                                                     |
| Se141 | TP53_D127Y                                                       |
| Se141 | RPS6KB1_P412L                                                    |
| Se141 | DHX34_T556A                                                      |
| Se141 | TRPC4AP_T252S                                                    |
| Se141 | PRODH_G434D                                                      |
| Se141 | PRPS2_Q156R                                                      |
| Se141 | JUN_NLADPVGSLKPPHLARRGAAQAGVARAGAPDNPVQQRAHHHH<br>ADPHPVVPVQERDR |
| Se141 | RRNAD1_SEFLENPSQSSIPETCQAQEAA                                    |
| Se141 | SETD9_IAYSYDKQSPLVLVALRDINQG                                     |
| Se142 | RALGPS2_H482Y                                                    |
| Se142 | EPAS1_G197A                                                      |
| Se142 | ZDBF2_F1601L                                                     |
| Se142 | MCTP1_H310N                                                      |
| Se142 | KDM4C_C109F                                                      |
| Se142 | GNAQ_T96S                                                        |
| Se142 | FRMD4A_G887R                                                     |
| Se142 | SPATA13_E174K                                                    |
| Se142 | MCF2L_F806L                                                      |
| Se142 | APIG1_R35Q                                                       |
| Se142 | TP53_R141C                                                       |
| Se142 | PIK3C3_S180L                                                     |
| Se142 | ZNF430_K149R                                                     |
| Se142 | YDJC_A148P                                                       |
| Se142 | PANX2_V379D                                                      |
| Se142 | TENM1_S95F                                                       |
| Se142 | SYNE2_RHLQEMANSLPFKDGREKTVNQ                                     |
| Se142 | U2AF1L4_FGTEKDKVNCSDRCSRLHNKP                                    |
| Se143 | MOV10_V417M                                                      |
| Se143 | POLR3GL_E190A                                                    |
| Se143 | ELMOD3_H110P                                                     |
| Se143 | CD8A_E108Q                                                       |
| Se143 | PSD4_G421R                                                       |
| Se143 | PLEKHM3_E634D                                                    |
| Se143 | PTH2R_A49D                                                       |
| Se143 | SST_A11G                                                         |
| Se143 | PTPN13_A1012E                                                    |
| Se143 | TENM3_N1582I                                                     |
| Se143 | SRFBP1_A197S                                                     |
| Se143 | PCDHGB4_E359D                                                    |
| Se143 | HECW1_T717M                                                      |

|       |                                                   |
|-------|---------------------------------------------------|
| Se143 | ZP3_P22H                                          |
| Se143 | FAM200A_S254A                                     |
| Se143 | XPO7_F553S                                        |
| Se143 | SPIDR_E600Q                                       |
| Se143 | RIPK2_R247P                                       |
| Se143 | LRSAM1_R315C                                      |
| Se143 | VSTM4_R299Q                                       |
| Se143 | PPP1CA_K190Q                                      |
| Se143 | EXPH5_A890E                                       |
| Se143 | MON2_P453R                                        |
| Se143 | SBNO1_P220A                                       |
| Se143 | AJUBA_D27E                                        |
| Se143 | NUBPL_K65E                                        |
| Se143 | CEP170B_P1503L                                    |
| Se143 | ATP10A_A804V                                      |
| Se143 | ACSF3_R53H                                        |
| Se143 | TP53_M105I                                        |
| Se143 | RNF213_C4348W                                     |
| Se143 | COLGALT1_A189V                                    |
| Se143 | ZBTB45_H8Y                                        |
| Se143 | ITCH_P456A                                        |
| Se143 | RBL1_S1011F                                       |
| Se143 | C22orf39_H68D                                     |
| Se143 | MED12_A1137V                                      |
| Se143 | MED26_INDVRKKTKNESPPSGPRSCCGAGRSSSSRHTSMRRRCGGWR  |
| Se143 | GPPALPTGAHTTAGRRWGRLAHPGASMT                      |
| Se143 | SLC6A6_REPNRWAVEREEPHLTTLAPS                      |
| Se143 | TCEB3_ELERPHKVSHGLRGEMRERGVTECHQLTLQTLSELLIMAMFNP |
| Se143 | LHLVPVLRCTSTTTDPWRRTRSPLFHTRS LGKATAMPFR TDSPAKN  |
| Se143 | DTWVNPMGKGL                                       |
| Se144 | CYP4B1_D359V                                      |
| Se144 | ADGRL4_I163V                                      |
| Se144 | VCAM1_R407K                                       |
| Se144 | IGSF3_R805C                                       |
| Se144 | RGS16_A78V                                        |
| Se144 | CAD_G485A                                         |
| Se144 | THADA_C1042Y                                      |
| Se144 | TMBIM1_A118T                                      |
| Se144 | DZIP3_R357T                                       |
| Se144 | WWC2_E325V                                        |
| Se144 | SLF1_K20N                                         |
| Se144 | ZNF354B_K364Q                                     |
| Se144 | PHACTR1_S50Y                                      |
| Se144 | EGFL8_G233A                                       |
| Se144 | PKHD1L1_G1179C                                    |
| Se144 | FBXW5_C114Y                                       |
| Se144 | NMT2_P126L                                        |
| Se144 | CHD4_K1184E                                       |
| Se144 | PRSS21_Q252E                                      |
| Se144 | BFAR_E75G                                         |
| Se144 | ARHGDI1A_V204L                                    |
| Se144 | RAD23A_V3I                                        |
| Se144 | ZNF568_S101I                                      |
| Se144 | NINL_Q624K                                        |

|       |                                                 |
|-------|-------------------------------------------------|
| Se144 | PRDM15_V538I                                    |
| Se144 | SH3D19_KLPFNRSSDMKKQSNLATGLS                    |
| Se145 | HPDL_P254Q                                      |
| Se145 | MUTYH_D238Y                                     |
| Se145 | LRRRC8C_C322S                                   |
| Se145 | PTGFRN_N540D                                    |
| Se145 | TRAPPC12_E579D                                  |
| Se145 | TET3_Q330H                                      |
| Se145 | MFSD6_F456I                                     |
| Se145 | STAT1_S508F                                     |
| Se145 | PSMD2_L657P                                     |
| Se145 | TBCCD1_P367H                                    |
| Se145 | BMPR1B_D384Y                                    |
| Se145 | FBXW7_L170V                                     |
| Se145 | CDH18_I634V                                     |
| Se145 | CREBRF_S37L                                     |
| Se145 | GUSB_Y198C                                      |
| Se145 | EPPK1_V1290L                                    |
| Se145 | C10orf88_G203V                                  |
| Se145 | EXPH5_S803C                                     |
| Se145 | CLEC12A_S115R                                   |
| Se145 | ERP27_L96P                                      |
| Se145 | PAPOLA_M226L                                    |
| Se145 | IFT140_A349T                                    |
| Se145 | LAT_C29W                                        |
| Se145 | SLC38A7_V60I                                    |
| Se145 | TP53_C9Y                                        |
| Se145 | TOP3A_C296W                                     |
| Se145 | SUPT6H_H792Y                                    |
| Se145 | MISP_A617T                                      |
| Se145 | CCDC22_A398T                                    |
| Se145 | ANGPT1_GSLDFORGWKELKWWLEIPPVNIGWGMSLFLPLPVRGSTC |
| Se145 | DMPK_SEALSLLFAVLSRAAALGCIG                      |
| Se145 | DMPK_YRRRFPCSCSPFCLVPPPWAAL                     |
| Se146 | FOLH1_M361L                                     |
| Se146 | ARNTL2_A353V                                    |
| Se146 | TP53_R43H                                       |
| Se146 | GID4_S126P                                      |
| Se146 | DIP2A_I968V                                     |
| Se147 | AP4B1_C214S                                     |
| Se147 | COPA_D998Y                                      |
| Se147 | SWT1_S366T                                      |
| Se147 | HMCN1_S5611Y                                    |
| Se147 | TLR5_G10A                                       |
| Se147 | AHCTF1_P1672T                                   |
| Se147 | NCKAP1_I720V                                    |
| Se147 | DHTKD1_G104R                                    |
| Se147 | EXT2_P558L                                      |
| Se147 | MAP3K11_C686Y                                   |
| Se147 | MCF2L_L730P                                     |
| Se147 | INO80E_E152K                                    |
| Se147 | TP53_L125Q                                      |
| Se147 | IRGQ_R483K                                      |
| Se147 | SIGLEC7_R253T                                   |

|       |                                                                                                                                                                                           |
|-------|-------------------------------------------------------------------------------------------------------------------------------------------------------------------------------------------|
| Se147 | ZNF470_V553F                                                                                                                                                                              |
| Se147 | ATP9A_A89T                                                                                                                                                                                |
| Se147 | EIF4G1_KLLKNHDEESLSAFVVCSPPLAKTWLKKPSPEWISISTRWK<br>KSLKKRRRHPASALCCRTCWICEGAIGCHAEGIRVPRPLTRSIRRLRW<br>KNIESTSKCSSSWPRAVTSVGAVLQALPSAVDFPLWMMVAGTQFPSA<br>KVAAPLTPHDSRPSLAPSILTTSSLHLEGD |
| Se147 | EPC2_CKTKHPHLSLMWFVKRRSTQRSKQRL                                                                                                                                                           |
| Se147 | RAB6A_QEQPVSEGGCSANLPCHLQPSSEAHCFGLTSLTAV                                                                                                                                                 |
| Se147 | PCDHGA11_QRGDRSRLLLCIFLGTLRGFR                                                                                                                                                            |
| Se150 | PTGS2_V87A                                                                                                                                                                                |
| Se150 | ASPM_Q2844E                                                                                                                                                                               |
| Se150 | CAMSAP2_L737V                                                                                                                                                                             |
| Se150 | CYP26B1_F389I                                                                                                                                                                             |
| Se150 | SESTD1_L359I                                                                                                                                                                              |
| Se150 | EPHA3_E872Q                                                                                                                                                                               |
| Se150 | MATR3_L28F                                                                                                                                                                                |
| Se150 | NDST1_P221S                                                                                                                                                                               |
| Se150 | SIMC1_P159H                                                                                                                                                                               |
| Se150 | HERPUD2_H200Q                                                                                                                                                                             |
| Se150 | CLDN15_P149L                                                                                                                                                                              |
| Se150 | CLDN15_P149T                                                                                                                                                                              |
| Se150 | RAB11FIP1_V5I                                                                                                                                                                             |
| Se150 | RAB18_E173V                                                                                                                                                                               |
| Se150 | RHOBTB1_D674G                                                                                                                                                                             |
| Se150 | SCD_A159V                                                                                                                                                                                 |
| Se150 | FJX1_R149C                                                                                                                                                                                |
| Se150 | MPEG1_L121H                                                                                                                                                                               |
| Se150 | SYT12_G27R                                                                                                                                                                                |
| Se150 | CAPRIN2_C867W                                                                                                                                                                             |
| Se150 | SERPINA5_L79V                                                                                                                                                                             |
| Se150 | RPS27L_T74A                                                                                                                                                                               |
| Se150 | USP31_G522R                                                                                                                                                                               |
| Se150 | ITGAM_C776R                                                                                                                                                                               |
| Se150 | RYR1_K2360T                                                                                                                                                                               |
| Se150 | MAP3K10_A316S                                                                                                                                                                             |
| Se150 | CDS2_IKLSPKKTWEGSLGASLLWCLAFCPPM                                                                                                                                                          |
| Se150 | IRS1_PMPASRCSAPSACRPVAPVAMAPPRIVSSHGDLVLRCLVPPAMAV<br>SSPRMSMAPVPAISGVPSAVSLRIPWATPHQPAVRRS                                                                                               |
| Se150 | KBTBD2_YWFDAQQNTWFQRPQCFLSA                                                                                                                                                               |
| Se150 | LMBRD1_CKGKKSVEGVMMSPLSILLDSLLS                                                                                                                                                           |
| Se150 | PTK2B_SSREEAQQLWEKVKMRQILDKQ                                                                                                                                                              |
| Se150 | TMEM184B_LLLSSDDEFLVRAAVAELVAP                                                                                                                                                            |
| Se151 | MTMR12_I264T                                                                                                                                                                              |
| Se152 | LHX9_E108D                                                                                                                                                                                |
| Se152 | BIRC6_A2681V                                                                                                                                                                              |
| Se152 | FBXO41_S411F                                                                                                                                                                              |
| Se152 | NCKAP5_L439F                                                                                                                                                                              |
| Se152 | NCKAP5_G829A                                                                                                                                                                              |
| Se152 | SCRN3_N410K                                                                                                                                                                               |
| Se152 | TTC14_K463N                                                                                                                                                                               |
| Se152 | PCDH18_V201I                                                                                                                                                                              |
| Se152 | MDN1_R2012C                                                                                                                                                                               |
| Se152 | SPAG1_G773R                                                                                                                                                                               |
| Se152 | DGKZ_R44C                                                                                                                                                                                 |

|       |                                                |
|-------|------------------------------------------------|
| Se152 | MTCH2_A62V                                     |
| Se152 | KCNJ5_L141P                                    |
| Se152 | DYNC1H1_E1034K                                 |
| Se152 | CNOT1_E879K                                    |
| Se152 | TP53_G112S                                     |
| Se152 | PIEZO2_R399I                                   |
| Se152 | SPRTN_MTL CAGICS YEEGWNV FHPSQRTPFEVEAKKGSCRDP |
| Se152 | SPRTN_MTL CAGICS YEEGWNV FHPSQRTPFEVEAKKGSCRGI |
