# Supplementary material for: Neoantigen load and HLA-class I expression identify a subgroup of tumors with a T-cell-inflamed phenotype and favorable prognosis in homologous recombination-proficient high-grade serous ovarian carcinoma
Source: PubMed Central journal article supplement — J Immunother Cancer. 2020 May 26;8(1):e000375. doi: 10.1136/jitc-2019-000375 (PMC7254153; doi:10.1136/jitc-2019-000375), 2020-05-26
Supplement: jitc-2019-000375supp005.pdf [file jitc-2019-000375supp005.pdf]

Supplementary Table S5. GSEA between neoAg<sup>hi</sup>HLA<sup>hi</sup> and others using GO\_BP Immune response gene sets

| NAME                                                                                          | SIZE | ES       | NES      | NOM p-val  | FDR q-val | FWER p-val | RANK AT MAX |
|-----------------------------------------------------------------------------------------------|------|----------|----------|------------|-----------|------------|-------------|
| GO_ADAPTIVE_IMMUNE_RESPONSE                                                                   | 378  | 0.62997  | 3.542971 | p<0.001    | q<0.001   | p<0.001    | 2682        |
| GO_ADAPTIVE_IMMUNE_RESPONSE_BASED_ON_SOMATIC_RECOMBINATION_OF_IMMUNE_RECEPTORS_BUILT_FROM_IMM | 245  | 0.599089 | 3.162659 | p<0.001    | q<0.001   | p<0.001    | 2471        |
| GO_T_CELL_ACTIVATION_INVOLVED_IN_IMMUNE_RESPONSE                                              | 98   | 0.641456 | 3.036672 | p<0.001    | q<0.001   | p<0.001    | 1956        |
| GO_REGULATION_OF_ADAPTIVE_IMMUNE_RESPONSE                                                     | 154  | 0.59096  | 2.936618 | p<0.001    | q<0.001   | p<0.001    | 2560        |
| GO_T_CELL_DIFFERENTIATION_INVOLVED_IN_IMMUNE_RESPONSE                                         | 64   | 0.671069 | 2.909736 | p<0.001    | q<0.001   | p<0.001    | 3418        |
| GO_POSITIVE_REGULATION_OF_ADAPTIVE_IMMUNE_RESPONSE                                            | 98   | 0.622807 | 2.900395 | p<0.001    | q<0.001   | p<0.001    | 2329        |
| GO_IMMUNE_RESPONSE_REGULATING_CELL_SURFACE_RECEPTOR_SIGNALING_PATHWAY                         | 366  | 0.525339 | 2.896291 | p<0.001    | q<0.001   | p<0.001    | 3054        |
| GO_LYMPHOCYTE_ACTIVATION_INVOLVED_IN_IMMUNE_RESPONSE                                          | 169  | 0.571542 | 2.876743 | p<0.001    | q<0.001   | p<0.001    | 3100        |
| GO_T_HELPER_1_TYPE_IMMUNE_RESPONSE                                                            | 41   | 0.706962 | 2.782178 | p<0.001    | q<0.001   | p<0.001    | 1779        |
| GO_NATURAL_KILLER_CELL_ACTIVATION_INVOLVED_IN_IMMUNE_RESPONSE                                 | 31   | 0.736837 | 2.728468 | p<0.001    | q<0.001   | p<0.001    | 1768        |
| GO_NEGATIVE_REGULATION_OF_IMMUNE_RESPONSE                                                     | 135  | 0.542388 | 2.693604 | p<0.001    | q<0.001   | p<0.001    | 3295        |
| GO_REGULATION_OF_INNATE_IMMUNE_RESPONSE                                                       | 410  | 0.482349 | 2.687193 | p<0.001    | q<0.001   | p<0.001    | 3297        |
| GO_T_HELPER_17_TYPE_IMMUNE_RESPONSE                                                           | 27   | 0.730914 | 2.527093 | p<0.001    | q<0.001   | p<0.001    | 3100        |
| GO_CYTOKINE_PRODUCTION_INVOLVED_IN_IMMUNE_RESPONSE                                            | 99   | 0.531027 | 2.453525 | p<0.001    | q<0.001   | p<0.001    | 3082        |
| GO_REGULATION_OF_CYTOKINE_PRODUCTION_INVOLVED_IN_IMMUNE_RESPONSE                              | 83   | 0.548713 | 2.451129 | p<0.001    | q<0.001   | p<0.001    | 3082        |
| GO_REGULATION_OF_PRODUCTION_OF_MOLECULAR_MEDIATOR_OF_IMMUNE_RESPONSE                          | 135  | 0.491739 | 2.447749 | p<0.001    | q<0.001   | p<0.001    | 3082        |
| GO_ACTIVATION_OF_INNATE_IMMUNE_RESPONSE                                                       | 291  | 0.454441 | 2.439946 | p<0.001    | q<0.001   | p<0.001    | 3297        |
| GO_NEGATIVE_REGULATION_OF_ADAPTIVE_IMMUNE_RESPONSE                                            | 45   | 0.606788 | 2.43843  | p<0.001    | q<0.001   | p<0.001    | 2806        |
| GO_REGULATION_OF_T_HELPER_1_TYPE_IMMUNE_RESPONSE                                              | 27   | 0.687544 | 2.41696  | p<0.001    | q<0.001   | p<0.001    | 2248        |
| GO_REGULATION_OF_T_HELPER_17_TYPE_IMMUNE_RESPONSE                                             | 19   | 0.744327 | 2.415787 | p<0.001    | q<0.001   | p<0.001    | 3054        |
| GO_NEGATIVE_REGULATION_OF_INNATE_IMMUNE_RESPONSE                                              | 49   | 0.591969 | 2.399002 | p<0.001    | q<0.001   | p<0.001    | 3125        |
| GO_PRODUCTION_OF_MOLECULAR_MEDIATOR_OF_IMMUNE_RESPONSE                                        | 184  | 0.461268 | 2.389991 | p<0.001    | q<0.001   | p<0.001    | 3082        |
| GO_HUMORAL_IMMUNE_RESPONSE                                                                    | 232  | 0.440164 | 2.341211 | p<0.001    | q<0.001   | p<0.001    | 2941        |
| GO_TYPE_2_IMMUNE_RESPONSE                                                                     | 35   | 0.616131 | 2.327878 | p<0.001    | q<0.001   | p<0.001    | 2471        |
| GO_POSITIVE_REGULATION_OF_PRODUCTION_OF_MOLECULAR_MEDIATOR_OF_IMMUNE_RESPONSE                 | 91   | 0.502618 | 2.302716 | p<0.001    | q<0.001   | p<0.001    | 3234        |
| GO_POSITIVE_REGULATION_OF_CYTOKINE_PRODUCTION_INVOLVED_IN_IMMUNE_RESPONSE                     | 53   | 0.548166 | 2.259017 | p<0.001    | q<0.001   | p<0.001    | 854         |
| GO_B_CELL_ACTIVATION_INVOLVED_IN_IMMUNE_RESPONSE                                              | 70   | 0.499756 | 2.185903 | p<0.001    | 2.08E-04  | 0.002      | 3009        |
| GO_NEGATIVE_REGULATION_OF_CYTOKINE_PRODUCTION_INVOLVED_IN_IMMUNE_RESPONSE                     | 25   | 0.634481 | 2.175823 | p<0.001    | 2.01E-04  | 0.002      | 2714        |
| GO_REGULATION_OF_TYPE_2_IMMUNE_RESPONSE                                                       | 29   | 0.605298 | 2.170934 | p<0.001    | 1.94E-04  | 0.002      | 2471        |
| GO_POSITIVE_REGULATION_OF_TYPE_2_IMMUNE_RESPONSE                                              | 15   | 0.722106 | 2.159735 | p<0.001    | 1.88E-04  | 0.002      | 1956        |
| GO_NEGATIVE_REGULATION_OF_PRODUCTION_OF_MOLECULAR_MEDIATOR_OF_IMMUNE_RESPONSE                 | 36   | 0.583307 | 2.130483 | p<0.001    | 1.81E-04  | 0.002      | 2714        |
| GO_HUMORAL_IMMUNE_RESPONSE_MEDIATED_BY_CIRCULATING_IMMUNOGLOBULIN                             | 46   | 0.528715 | 2.101938 | p<0.001    | 1.76E-04  | 0.002      | 2329        |
| GO_POSITIVE_REGULATION_OF_T_HELPER_1_TYPE_IMMUNE_RESPONSE                                     | 20   | 0.640702 | 2.07592  | p<0.001    | 2.75E-04  | 0.003      | 2248        |
| GO_IMMUNOGLOBULIN_PRODUCTION_INVOLVED_IN_IMMUNOGLOBULIN_MEDIATED_IMMUNE_RESPONSE              | 52   | 0.494285 | 2.014678 | p<0.001    | 6.33E-04  | 0.006      | 2682        |
| GO_CYTOKINE_SECRETION_INVOLVED_IN_IMMUNE_RESPONSE                                             | 19   | 0.631347 | 1.976137 | p<0.001    | 0.0011397 | 0.01       | 2029        |
| GO_POSITIVE_REGULATION_OF_MYELOID_LEUKOCYTE_CYTOKINE_PRODUCTION_INVOLVED_IN_IMMUNE_RESPONSE   | 19   | 0.604447 | 1.915522 | p<0.001    | 0.0017338 | 0.016      | 1536        |
| GO_REGULATION_OF_HUMORAL_IMMUNE_RESPONSE                                                      | 65   | 0.439006 | 1.895828 | p<0.001    | 0.0020195 | 0.019      | 2933        |
| GO_INNATE_IMMUNE_RESPONSE_IN_MUCOSA                                                           | 21   | 0.576034 | 1.868944 | p<0.001    | 0.002449  | 0.023      | 2581        |
| GO_INNATE_IMMUNE_RESPONSE_ACTIVATING_CELL_SURFACE_RECEPTOR_SIGNALING_PATHWAY                  | 108  | 0.394924 | 1.853693 | p<0.001    | 0.0028675 | 0.028      | 2999        |
| GO_IMMUNE_RESPONSE_TO_TUMOR_CELL                                                              | 15   | 0.619416 | 1.846352 | 0.01075269 | 0.0028762 | 0.029      | 1303        |
| GO_REGULATION_OF_MAST_CELL_ACTIVATION_INVOLVED_IN_IMMUNE_RESPONSE                             | 29   | 0.499401 | 1.791039 | p<0.001    | 0.0036515 | 0.037      | 3295        |
| GO_ANTIMICROBIAL_HUMORAL_IMMUNE_RESPONSE_MEDIATED_BY_ANTIMICROBIAL_PEPTIDE                    | 68   | 0.40856  | 1.767278 | 0.00361011 | 0.0037235 | 0.038      | 2581        |
| GO_ORGAN_OR_TISSUE_SPECIFIC_IMMUNE_RESPONSE                                                   | 33   | 0.467104 | 1.732756 | p<0.001    | 0.0048163 | 0.052      | 2581        |
| GO_MATURE_B_CELL_DIFFERENTIATION_INVOLVED_IN_IMMUNE_RESPONSE                                  | 19   | 0.501452 | 1.560626 | 0.02686567 | 0.017056  | 0.184      | 3009        |
| GO_POSITIVE_REGULATION_OF_HUMORAL_IMMUNE_RESPONSE                                             | 15   | 0.49522  | 1.471046 | 0.07627118 | 0.0321627 | 0.31       | 2329        |
