# Supplementary material for: Neoantigen load and HLA-class I expression identify a subgroup of tumors with a T-cell-inflamed phenotype and favorable prognosis in homologous recombination-proficient high-grade serous ovarian carcinoma
Source: PubMed Central journal article supplement — J Immunother Cancer. 2020 May 26;8(1):e000375. doi: 10.1136/jitc-2019-000375 (PMC7254153; doi:10.1136/jitc-2019-000375), 2020-05-26
Supplement: jitc-2019-000375supp006.pdf [file jitc-2019-000375supp006.pdf]

**Supplementary Table S6. GSEA between neoAg<sup>hi</sup>HLA<sup>hi</sup> and others using immune cell sets**

| NAME                | SIZE | ES       | NES      | NOM p-val  | FDR q-val | FWER p-val | RANK AT MAX |
|---------------------|------|----------|----------|------------|-----------|------------|-------------|
| T CELLS             | 78   | 0.79033  | 3.57019  | p<0.001    | q<0.001   | p<0.001    | 2086        |
| TH1                 | 36   | 0.838386 | 3.276597 | p<0.001    | q<0.001   | p<0.001    | 1014        |
| TGD                 | 40   | 0.77882  | 3.014875 | p<0.001    | q<0.001   | p<0.001    | 3142        |
| ACTIVATED CD4       | 32   | 0.735336 | 2.718884 | p<0.001    | q<0.001   | p<0.001    | 4090        |
| IMMATURE B CELLS    | 19   | 0.785138 | 2.510502 | p<0.001    | q<0.001   | p<0.001    | 2648        |
| EFFECTOR MEMORY CD8 | 38   | 0.640041 | 2.386056 | p<0.001    | q<0.001   | p<0.001    | 2463        |
| TREG                | 24   | 0.701768 | 2.365215 | p<0.001    | q<0.001   | p<0.001    | 1801        |
| MDSC                | 57   | 0.557479 | 2.345167 | p<0.001    | q<0.001   | p<0.001    | 3196        |
| DC                  | 27   | 0.649422 | 2.255075 | p<0.001    | q<0.001   | p<0.001    | 4474        |
| CENTRAL MEMORY CD8  | 15   | 0.707961 | 2.108177 | p<0.001    | 4.20E-04  | 0.001      | 2010        |
| IDC                 | 21   | 0.621435 | 2.016924 | p<0.001    | 0.0011318 | 0.004      | 4370        |
| NK                  | 16   | 0.603275 | 1.833749 | 0.01179941 | 0.0070487 | 0.029      | 2528        |
| MONOCYTES           | 23   | 0.52973  | 1.784878 | p<0.001    | 0.0071476 | 0.032      | 4417        |
| MACROPHAGES         | 20   | 0.462984 | 1.486027 | 0.05263158 | 0.0639577 | 0.252      | 4812        |
| CENTRAL MEMORY CD4  | 20   | 0.439471 | 1.437098 | 0.06122449 | 0.0771579 | 0.315      | 3131        |
| EOSINOPHIL          | 15   | 0.442066 | 1.343737 | 0.11340206 | 0.1237764 | 0.477      | 5272        |
| MAST CELLS          | 38   | 0.340408 | 1.312109 | 0.09061489 | 0.136855  | 0.546      | 3519        |
| ACTIVATED CD8       | 22   | 0.366635 | 1.195349 | 0.21212122 | 0.2353367 | 0.774      | 972         |
| TH2                 | 25   | 0.315245 | 1.103884 | 0.29360464 | 0.3333248 | 0.908      | 3938        |
| TH17                | 23   | 0.275734 | 0.926858 | 0.57636887 | 0.6024197 | 0.99       | 3118        |
| PDC                 | 17   | 0.270269 | 0.834133 | 0.7277937  | 0.7374638 | 0.999      | 2152        |
