# Supplementary material for: Neoantigen load and HLA-class I expression identify a subgroup of tumors with a T-cell-inflamed phenotype and favorable prognosis in homologous recombination-proficient high-grade serous ovarian carcinoma
Source: PubMed Central journal article supplement — J Immunother Cancer. 2020 May 26;8(1):e000375. doi: 10.1136/jitc-2019-000375 (PMC7254153; doi:10.1136/jitc-2019-000375), 2020-05-26
Supplement: jitc-2019-000375supp007.pdf [file jitc-2019-000375supp007.pdf]

**Supplementary Table S7. GSEA between neoAg<sup>hi</sup>HLA<sup>hi</sup> and others using Hallmark gene sets**

| NAME                                       | SIZE | ES       | NES       | NOM p-val | FDR q-val | FWER p-val | RANK AT MAX |
|--------------------------------------------|------|----------|-----------|-----------|-----------|------------|-------------|
| HALLMARK_INTERFERON_GAMMA_RESPONSE         | 199  | 0.680196 | 3.532326  | p<0.001   | q<0.001   | p<0.001    | 3020        |
| HALLMARK_ALLOGRAFT_REJECTION               | 200  | 0.650183 | 3.3717546 | p<0.001   | q<0.001   | p<0.001    | 3123        |
| HALLMARK_INTERFERON_ALPHA_RESPONSE         | 97   | 0.688111 | 3.2264938 | p<0.001   | q<0.001   | p<0.001    | 2919        |
| HALLMARK_INFLAMMATORY_RESPONSE             | 200  | 0.579116 | 3.0240781 | p<0.001   | q<0.001   | p<0.001    | 3357        |
| HALLMARK_TNFA_SIGNALING_VIA_NFKB           | 200  | 0.510466 | 2.6089373 | p<0.001   | q<0.001   | p<0.001    | 2806        |
| HALLMARK_IL6_JAK_STAT3_SIGNALING           | 87   | 0.58048  | 2.5902042 | p<0.001   | q<0.001   | p<0.001    | 2399        |
| HALLMARK_G2M_CHECKPOINT                    | 190  | 0.503482 | 2.575577  | p<0.001   | q<0.001   | p<0.001    | 3623        |
| HALLMARK_E2F_TARGETS                       | 191  | 0.491166 | 2.5198984 | p<0.001   | q<0.001   | p<0.001    | 4524        |
| HALLMARK_COMPLEMENT                        | 200  | 0.482556 | 2.4921947 | p<0.001   | q<0.001   | p<0.001    | 2882        |
| HALLMARK_IL2_STAT5_SIGNALING               | 194  | 0.401231 | 2.0772722 | p<0.001   | q<0.001   | p<0.001    | 4057        |
| HALLMARK_KRAS_SIGNALING_UP                 | 199  | 0.353116 | 1.8167179 | p<0.001   | 0.001456  | 0.005      | 2316        |
| HALLMARK_EPITHELIAL_MESENCHYMAL_TRANSITION | 199  | 0.341129 | 1.7711827 | p<0.001   | 0.002612  | 0.01       | 4086        |
| HALLMARK_HYPOXIA                           | 199  | 0.328883 | 1.7257806 | p<0.001   | 0.002955  | 0.012      | 5204        |
| HALLMARK_APOPTOSIS                         | 161  | 0.34574  | 1.723137  | p<0.001   | 0.002744  | 0.012      | 4269        |
| HALLMARK_MTORC1_SIGNALING                  | 197  | 0.329316 | 1.7108343 | p<0.001   | 0.003     | 0.014      | 4651        |
| HALLMARK_PI3K_AKT_MTOR_SIGNALING           | 104  | 0.339098 | 1.601513  | 0.0042373 | 0.006414  | 0.032      | 1725        |
| HALLMARK_UV_RESPONSE_UP                    | 158  | 0.309827 | 1.5662086 | p<0.001   | 0.009843  | 0.05       | 3413        |
| HALLMARK_APICAL_JUNCTION                   | 199  | 0.301477 | 1.5618186 | p<0.001   | 0.009491  | 0.051      | 2758        |
| HALLMARK_P53_PATHWAY                       | 195  | 0.279367 | 1.4491265 | p<0.001   | 0.024636  | 0.134      | 3058        |
| HALLMARK_SPERMATOGENESIS                   | 132  | 0.284109 | 1.3841687 | p<0.001   | 0.039039  | 0.212      | 2636        |
| HALLMARK_MITOTIC_SPINDLE                   | 197  | 0.266137 | 1.3819926 | 0.0060241 | 0.03793   | 0.214      | 3623        |
| HALLMARK_GLYCOLYSIS                        | 198  | 0.25227  | 1.309452  | 0.0175439 | 0.067976  | 0.37       | 4039        |
| HALLMARK_REACTIVE_OXYGEN_SPECIES_PATHWAY   | 48   | 0.316441 | 1.2768631 | 0.105802  | 0.085716  | 0.458      | 2776        |
| HALLMARK_OXIDATIVE_PHOSPHORYLATION         | 197  | 0.2402   | 1.2318515 | 0.0526316 | 0.114239  | 0.579      | 4872        |
| HALLMARK_UNFOLDED_PROTEIN_RESPONSE         | 113  | 0.254267 | 1.2201619 | 0.0552995 | 0.122375  | 0.613      | 4066        |
| HALLMARK_COAGULATION                       | 137  | 0.24584  | 1.2078506 | 0.0817308 | 0.128179  | 0.647      | 2933        |
| HALLMARK_ADIPOGENESIS                      | 198  | 0.212571 | 1.1007594 | 0.1748252 | 0.289516  | 0.901      | 3218        |
| HALLMARK_ANDROGEN_RESPONSE                 | 100  | 0.225458 | 1.0532362 | 0.3138075 | 0.393744  | 0.959      | 4707        |
| HALLMARK_MYC_TARGETS_V1                    | 194  | 0.196561 | 1.0050031 | 0.4022988 | 0.52647   | 0.991      | 2243        |
| HALLMARK_FATTY_ACID_METABOLISM             | 155  | 0.184929 | 0.941502  | 0.6557377 | 0.720956  | 1          | 3187        |
| HALLMARK_XENOBIOTIC_METABOLISM             | 200  | 0.179356 | 0.9186347 | 0.7257143 | 0.773657  | 1          | 3146        |
| HALLMARK_HEME_METABOLISM                   | 197  | 0.165113 | 0.8548493 | 0.9235294 | 0.919445  | 1          | 3701        |
| HALLMARK_ANGIOGENESIS                      | 36   | 0.226022 | 0.8468149 | 0.7763975 | 0.907325  | 1          | 3819        |
| HALLMARK_MYC_TARGETS_V2                    | 58   | 0.163076 | 0.6925389 | 0.9894366 | 1         | 1          | 3836        |
| HALLMARK_TGF_BETA_SIGNALING                | 54   | 0.159455 | 0.6698807 | 0.9792388 | 0.989906  | 1          | 4829        |
| HALLMARK_BILE_ACID_METABOLISM              | 112  | -0.31408 | -1.29246  | 0.0699482 | 0.895889  | 0.898      | 4623        |
| HALLMARK_WNT_BETA_CATENIN_SIGNALING        | 42   | -0.30374 | -1.069734 | 0.3399154 | 1         | 1          | 5995        |
| HALLMARK_HEDGEHOG_SIGNALING                | 36   | -0.30188 | -1.00855  | 0.4771341 | 1         | 1          | 7117        |
| HALLMARK_APICAL_SURFACE                    | 44   | -0.26699 | -0.944693 | 0.5642857 | 1         | 1          | 1626        |
| HALLMARK_MYOGENESIS                        | 200  | -0.20831 | -0.928614 | 0.6417556 | 1         | 1          | 5513        |
| HALLMARK_KRAS_SIGNALING_DN                 | 196  | -0.20635 | -0.913941 | 0.6768666 | 1         | 1          | 4331        |
| HALLMARK_ESTROGEN_RESPONSE_EARLY           | 196  | -0.19508 | -0.860379 | 0.8035928 | 1         | 1          | 6151        |
| HALLMARK_UV_RESPONSE_DN                    | 140  | -0.20166 | -0.856653 | 0.7719298 | 1         | 1          | 6237        |
| HALLMARK_DNA_REPAIR                        | 147  | -0.19078 | -0.805275 | 0.8794588 | 1         | 1          | 3330        |
| HALLMARK_PROTEIN_SECRETION                 | 96   | -0.18862 | -0.760492 | 0.9128065 | 1         | 1          | 6855        |
| HALLMARK_PEROXISOME                        | 101  | -0.18326 | -0.746444 | 0.9308094 | 1         | 1          | 6316        |
| HALLMARK_PANCREAS_BETA_CELLS               | 40   | -0.20368 | -0.706791 | 0.8986587 | 1         | 1          | 5055        |
| HALLMARK_ESTROGEN_RESPONSE_LATE            | 200  | -0.15943 | -0.703672 | 0.9929245 | 1         | 1          | 5794        |
| HALLMARK_CHOLESTEROL_HOMEOSTASIS           | 74   | -0.17342 | -0.671467 | 0.9793956 | 1         | 1          | 6160        |
| HALLMARK_NOTCH_SIGNALING                   | 32   | -0.17954 | -0.585991 | 0.9779412 | 0.997771  | 1          | 6627        |
