# Supplementary material for: Neoantigen load and HLA-class I expression identify a subgroup of tumors with a T-cell-inflamed phenotype and favorable prognosis in homologous recombination-proficient high-grade serous ovarian carcinoma
Source: PubMed Central journal article supplement — J Immunother Cancer. 2020 May 26;8(1):e000375. doi: 10.1136/jitc-2019-000375 (PMC7254153; doi:10.1136/jitc-2019-000375), 2020-05-26
Supplement: jitc-2019-000375supp008.pdf [file jitc-2019-000375supp008.pdf]

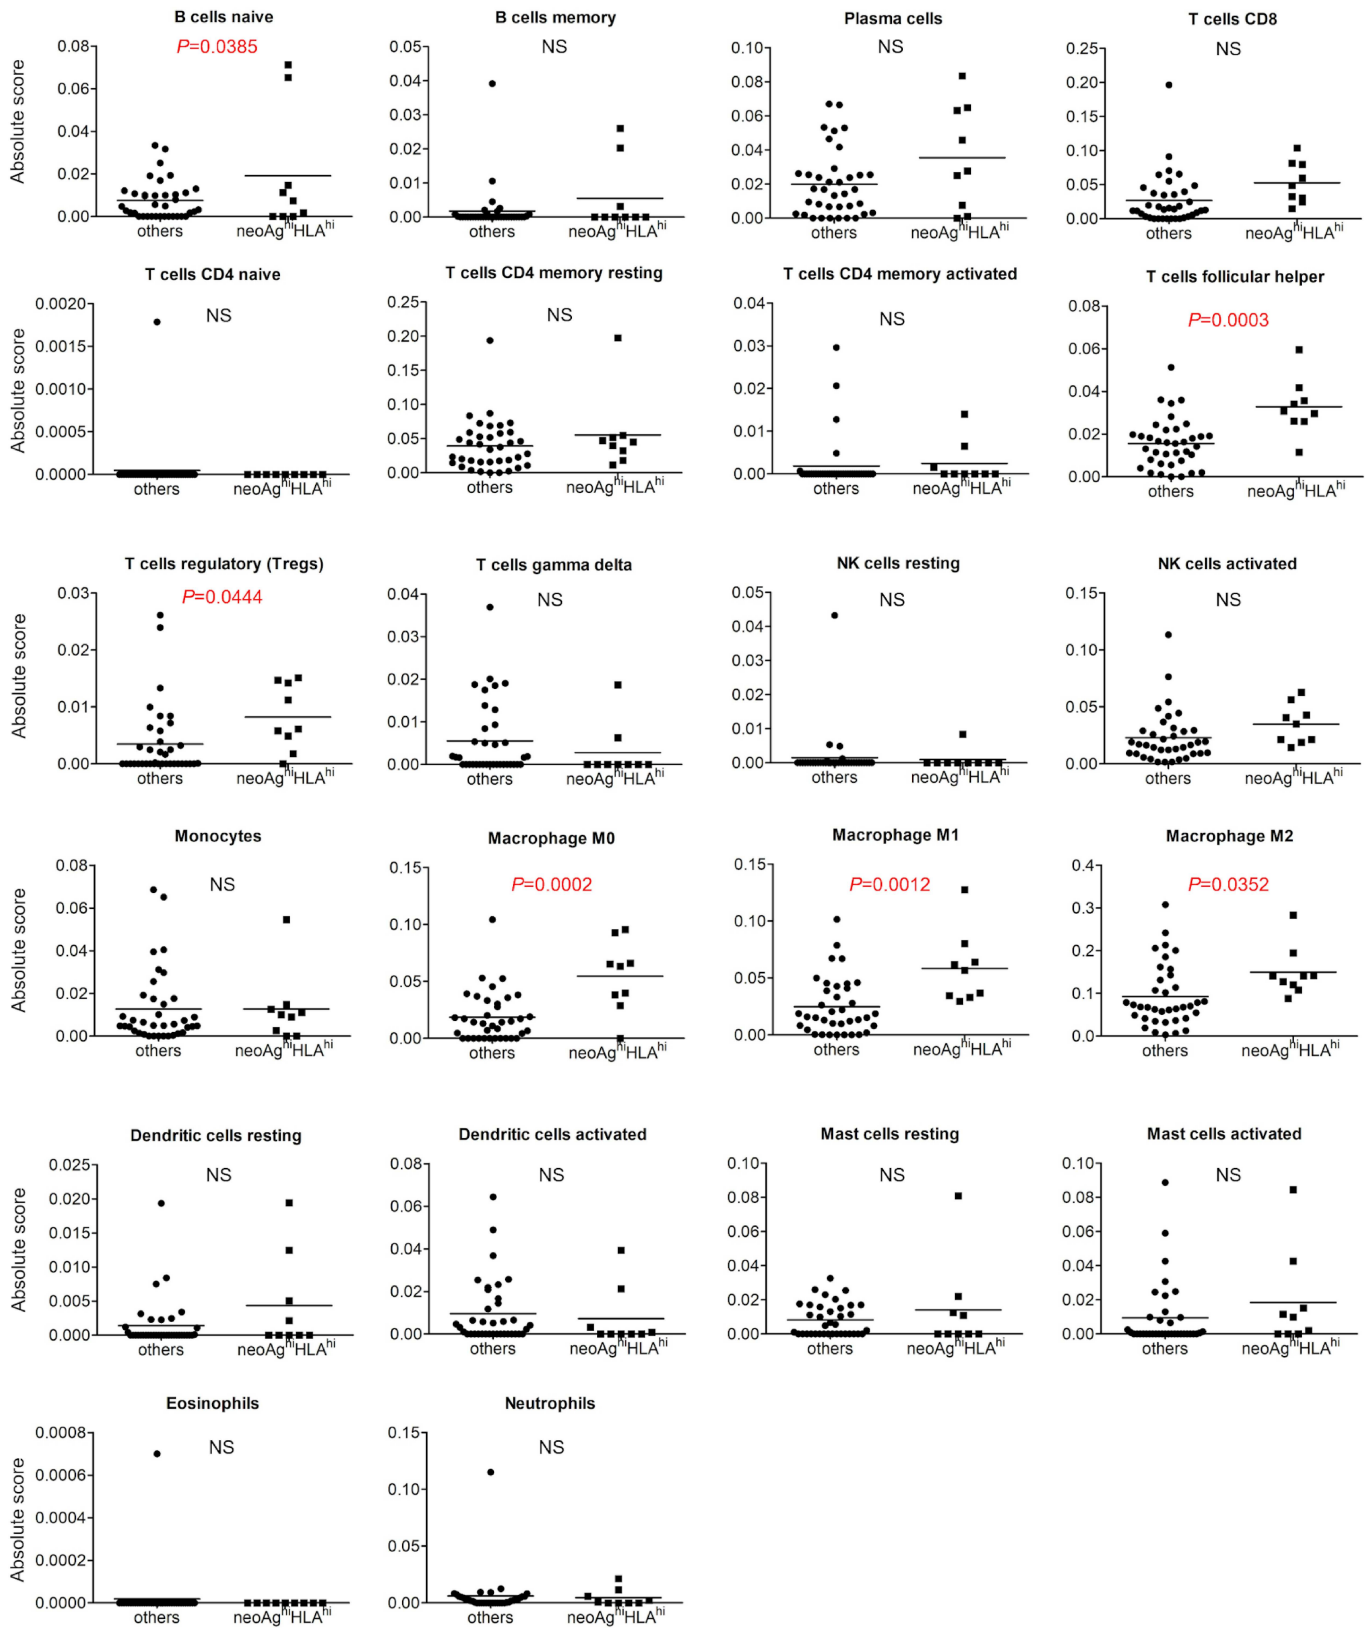

**Supplementary figure S1.** The absolute scores of each immune cell subtype in neoAg<sup>hi</sup>HLA<sup>hi</sup> tumors (n=9) and all others (n=37) were shown. NS, not significant.
