# Supplementary material for: Neoantigen load and HLA-class I expression identify a subgroup of tumors with a T-cell-inflamed phenotype and favorable prognosis in homologous recombination-proficient high-grade serous ovarian carcinoma
Source: PubMed Central journal article supplement — J Immunother Cancer. 2020 May 26;8(1):e000375. doi: 10.1136/jitc-2019-000375 (PMC7254153; doi:10.1136/jitc-2019-000375), 2020-05-26
Supplement: jitc-2019-000375supp010.pdf [file jitc-2019-000375supp010.pdf]

Supplementary Table S8. GSEA between HR-proficient and HR-deficient patients using GO\_BP Immune response gene sets

| NAME                                                                            | SIZE | ES       | NES      | NOM p-val  | FDR q-val | FWER p-val | RANK AT MAX |
|---------------------------------------------------------------------------------|------|----------|----------|------------|-----------|------------|-------------|
| GO_ADAPTIVE_IMMUNE_RESPONSE                                                     | 379  | 0.510053 | 2.664999 | p<0.001    | q<0.001   | p<0.001    | 3514        |
| GO_IMMUNE_RESPONSE_REGULATING_CELL_SURFACE_RECEPTOR_SIGNALING_PATHWAY           | 366  | 0.508331 | 2.642691 | p<0.001    | q<0.001   | p<0.001    | 4398        |
| GO_REGULATION_OF_INNATE_IMMUNE_RESPONSE                                         | 410  | 0.468298 | 2.484407 | p<0.001    | q<0.001   | p<0.001    | 3506        |
| GO_T_CELL_ACTIVATION_INVOLVED_IN_IMMUNE_RESPONSE                                | 98   | 0.547128 | 2.446655 | p<0.001    | q<0.001   | p<0.001    | 4331        |
| GO_T_HELPER_1_TYPE_IMMUNE_RESPONSE                                              | 41   | 0.638979 | 2.391949 | p<0.001    | q<0.001   | p<0.001    | 3738        |
| GO_ADAPTIVE_IMMUNE_RESPONSE_BASED_ON_SOMATIC_RECOMBINATION_OF_IMMUNE_RECEPTOR   | 245  | 0.480654 | 2.391187 | p<0.001    | q<0.001   | p<0.001    | 3618        |
| GO_T_CELL_DIFFERENTIATION_INVOLVED_IN_IMMUNE_RESPONSE                           | 64   | 0.586378 | 2.363931 | p<0.001    | q<0.001   | p<0.001    | 4331        |
| GO_LYMPHOCYTE_ACTIVATION_INVOLVED_IN_IMMUNE_RESPONSE                            | 169  | 0.469666 | 2.259244 | p<0.001    | q<0.001   | p<0.001    | 4331        |
| GO_ACTIVATION_OF_INNATE_IMMUNE_RESPONSE                                         | 291  | 0.433123 | 2.206835 | p<0.001    | q<0.001   | p<0.001    | 4139        |
| GO_REGULATION_OF_T_HELPER_1_TYPE_IMMUNE_RESPONSE                                | 27   | 0.661571 | 2.203886 | p<0.001    | q<0.001   | p<0.001    | 2315        |
| GO_NEGATIVE_REGULATION_OF_IMMUNE_RESPONSE                                       | 135  | 0.478324 | 2.183709 | p<0.001    | q<0.001   | p<0.001    | 3506        |
| GO_POSITIVE_REGULATION_OF_ADAPTIVE_IMMUNE_RESPONSE                              | 98   | 0.488219 | 2.171156 | p<0.001    | q<0.001   | p<0.001    | 4331        |
| GO_REGULATION_OF_ADAPTIVE_IMMUNE_RESPONSE                                       | 154  | 0.455728 | 2.155089 | p<0.001    | q<0.001   | p<0.001    | 3738        |
| GO_NEGATIVE_REGULATION_OF_PRODUCTION_OF_MOLECULAR_MEDIATOR_OF_IMMUNE_RESPONSE   | 36   | 0.56058  | 2.044436 | p<0.001    | q<0.001   | p<0.001    | 3286        |
| GO_NEGATIVE_REGULATION_OF_INNATE_IMMUNE_RESPONSE                                | 49   | 0.529042 | 2.01814  | p<0.001    | q<0.001   | p<0.001    | 3006        |
| GO_NATURAL_KILLER_CELL_ACTIVATION_INVOLVED_IN_IMMUNE_RESPONSE                   | 31   | 0.595279 | 2.008804 | p<0.001    | q<0.001   | p<0.001    | 2358        |
| GO_NEGATIVE_REGULATION_OF_CYTOKINE_PRODUCTION_INVOLVED_IN_IMMUNE_RESPONSE       | 25   | 0.618425 | 2.003259 | p<0.001    | q<0.001   | p<0.001    | 3006        |
| GO_POSITIVE_REGULATION_OF_T_HELPER_1_TYPE_IMMUNE_RESPONSE                       | 20   | 0.644139 | 1.992851 | p<0.001    | q<0.001   | p<0.001    | 3738        |
| GO_HUMORAL_IMMUNE_RESPONSE                                                      | 232  | 0.401072 | 1.974344 | p<0.001    | 3.08E-04  | 0.002      | 3667        |
| GO_REGULATION_OF_CYTOKINE_PRODUCTION_INVOLVED_IN_IMMUNE_RESPONSE                | 83   | 0.447502 | 1.929059 | p<0.001    | 0.001033  | 0.007      | 3006        |
| GO_CYTOKINE_PRODUCTION_INVOLVED_IN_IMMUNE_RESPONSE                              | 99   | 0.437141 | 1.920256 | p<0.001    | 0.001109  | 0.008      | 3006        |
| GO_ANTIMICROBIAL_HUMORAL_IMMUNE_RESPONSE_MEDIATED_BY_ANTIMICROBIAL_PEPTIDE      | 68   | 0.465225 | 1.919163 | p<0.001    | 0.001059  | 0.008      | 2221        |
| GO_REGULATION_OF_T_HELPER_17_TYPE_IMMUNE_RESPONSE                               | 19   | 0.615787 | 1.909776 | 0.0023753  | 0.001111  | 0.009      | 5438        |
| GO_T_HELPER_17_TYPE_IMMUNE_RESPONSE                                             | 27   | 0.57183  | 1.894576 | 0.00257069 | 0.001385  | 0.012      | 5438        |
| GO_INNATE_IMMUNE_RESPONSE_ACTIVATING_CELL_SURFACE_RECEPTOR_SIGNALING_PATHWAY    | 108  | 0.419977 | 1.877408 | p<0.001    | 0.001539  | 0.014      | 5146        |
| GO_PRODUCTION_OF_MOLECULAR_MEDIATOR_OF_IMMUNE_RESPONSE                          | 184  | 0.381509 | 1.807176 | p<0.001    | 0.002461  | 0.024      | 3286        |
| GO_REGULATION_OF_PRODUCTION_OF_MOLECULAR_MEDIATOR_OF_IMMUNE_RESPONSE            | 135  | 0.392162 | 1.804748 | 0.00290698 | 0.00237   | 0.024      | 3286        |
| GO_REGULATION_OF_TYPE_2_IMMUNE_RESPONSE                                         | 29   | 0.52377  | 1.75679  | 0.00479616 | 0.004074  | 0.041      | 3598        |
| GO_HUMORAL_IMMUNE_RESPONSE_MEDIATED_BY_CIRCULATING_IMMUNOGLOBULIN               | 46   | 0.457391 | 1.753524 | p<0.001    | 0.004266  | 0.045      | 3618        |
| GO_TYPE_2_IMMUNE_RESPONSE                                                       | 35   | 0.486732 | 1.734783 | 0.0023753  | 0.005236  | 0.057      | 3598        |
| GO_POSITIVE_REGULATION_OF_PRODUCTION_OF_MOLECULAR_MEDIATOR_OF_IMMUNE_RESPONSE   | 91   | 0.382287 | 1.668534 | p<0.001    | 0.008658  | 0.093      | 4414        |
| GO_POSITIVE_REGULATION_OF_CYTOKINE_PRODUCTION_INVOLVED_IN_IMMUNE_RESPONSE       | 53   | 0.409773 | 1.615374 | 0.0075188  | 0.013284  | 0.144      | 4280        |
| GO_NEGATIVE_REGULATION_OF_ADAPTIVE_IMMUNE_RESPONSE                              | 45   | 0.429797 | 1.605747 | 0.00514139 | 0.014116  | 0.156      | 3043        |
| GO_IMMUNOGLOBULIN_PRODUCTION_INVOLVED_IN_IMMUNOGLOBULIN_MEDIATED_IMMUNE_RESPC   | 52   | 0.399584 | 1.545182 | 0.00262467 | 0.021767  | 0.241      | 1950        |
| GO_POSITIVE_REGULATION_OF_TYPE_2_IMMUNE_RESPONSE                                | 15   | 0.544353 | 1.536424 | 0.03944315 | 0.022956  | 0.257      | 3598        |
| GO_IMMUNE_RESPONSE_TO_TUMOR_CELL                                                | 15   | 0.532487 | 1.527021 | 0.05463183 | 0.023691  | 0.273      | 1219        |
| GO_INNATE_IMMUNE_RESPONSE_IN_MUCOSA                                             | 21   | 0.492146 | 1.52632  | 0.02625298 | 0.023183  | 0.275      | 1859        |
| GO_B_CELL_ACTIVATION_INVOLVED_IN_IMMUNE_RESPONSE                                | 70   | 0.367309 | 1.521336 | 0.01485149 | 0.023477  | 0.284      | 4331        |
| GO_REGULATION_OF_MAST_CELL_ACTIVATION_INVOLVED_IN_IMMUNE_RESPONSE               | 29   | 0.45704  | 1.519014 | 0.02469136 | 0.023286  | 0.288      | 3362        |
| GO_POSITIVE_REGULATION_OF_HUMORAL_IMMUNE_RESPONSE                               | 15   | 0.509237 | 1.44882  | 0.06367925 | 0.037063  | 0.431      | 2087        |
| GO_ORGAN_OR_TISSUE_SPECIFIC_IMMUNE_RESPONSE                                     | 33   | 0.398445 | 1.392855 | 0.06313131 | 0.051722  | 0.551      | 1859        |
| GO_CYTOKINE_SECRETION_INVOLVED_IN_IMMUNE_RESPONSE                               | 19   | 0.461902 | 1.391068 | 0.1        | 0.051266  | 0.559      | 3856        |
| GO_REGULATION_OF_HUMORAL_IMMUNE_RESPONSE                                        | 65   | 0.331578 | 1.354395 | 0.04521276 | 0.063183  | 0.636      | 3103        |
| GO_POSITIVE_REGULATION_OF_MYELOID_LEUKOCYTE_CYTOKINE_PRODUCTION_INVOLVED_IN_IMM | 19   | 0.436232 | 1.323345 | 0.13333334 | 0.075303  | 0.72       | 3598        |
| GO_MATURE_B_CELL_DIFFERENTIATION_INVOLVED_IN_IMMUNE_RESPONSE                    | 19   | 0.250719 | 0.767615 | 0.8303167  | 0.890431  | 1          | 4142        |
