# Supplementary material for: Neoantigen load and HLA-class I expression identify a subgroup of tumors with a T-cell-inflamed phenotype and favorable prognosis in homologous recombination-proficient high-grade serous ovarian carcinoma
Source: PubMed Central journal article supplement — J Immunother Cancer. 2020 May 26;8(1):e000375. doi: 10.1136/jitc-2019-000375 (PMC7254153; doi:10.1136/jitc-2019-000375), 2020-05-26
Supplement: jitc-2019-000375supp011.pdf [file jitc-2019-000375supp011.pdf]

**Supplementary Table S9. GSEA between HR-proficient and HR-deficient patients using immune cell gene sets**

| NAME                | SIZE | ES       | NES      | NOM p-val | FDR q-val   | FWER p-val | RANK AT MAX |
|---------------------|------|----------|----------|-----------|-------------|------------|-------------|
| T CELLS             | 78   | 0.748288 | 3.199165 | p<0.001   | q<0.001     | p<0.001    | 2617        |
| TGD                 | 40   | 0.738924 | 2.731104 | p<0.001   | q<0.001     | p<0.001    | 2157        |
| TH1                 | 36   | 0.756828 | 2.711866 | p<0.001   | q<0.001     | p<0.001    | 1716        |
| MONOCYTES           | 23   | 0.657124 | 2.111421 | p<0.001   | 5.56E-04    | 0.001      | 4859        |
| EFFECTOR MEMORY CD8 | 38   | 0.567955 | 2.056199 | p<0.001   | 0.001111111 | 0.002      | 2502        |
| TREG                | 24   | 0.650492 | 2.048475 | p<0.001   | 9.26E-04    | 0.002      | 3404        |
| MAST CELLS          | 38   | 0.548938 | 2.012634 | p<0.001   | 0.00120181  | 0.003      | 2249        |
| DC                  | 27   | 0.59641  | 1.995531 | p<0.001   | 0.00105159  | 0.003      | 2549        |
| ACTIVATED CD4       | 32   | 0.580657 | 1.950041 | p<0.001   | 9.35E-04    | 0.003      | 5281        |
| NK                  | 16   | 0.623323 | 1.760297 | 0.0045872 | 0.01004701  | 0.046      | 2040        |
| IMMATURE B CELLS    | 19   | 0.560073 | 1.751667 | 0.0089087 | 0.00965247  | 0.048      | 4139        |
| IDC                 | 21   | 0.548243 | 1.697238 | 0.016317  | 0.01448597  | 0.077      | 1588        |
| MDSC                | 57   | 0.414711 | 1.602233 | 0.0081967 | 0.02573431  | 0.138      | 4371        |
| TH17                | 23   | 0.412668 | 1.326085 | 0.1034483 | 0.14192176  | 0.596      | 1903        |
| CENTRAL MEMORY CD8  | 15   | 0.450885 | 1.302948 | 0.1471264 | 0.15251385  | 0.648      | 2056        |
| CENTRAL MEMORY CD4  | 20   | 0.348523 | 1.085131 | 0.350365  | 0.4066017   | 0.953      | 4092        |
| ACTIVATED CD8       | 22   | 0.320868 | 1.026498 | 0.4048781 | 0.4786274   | 0.981      | 3641        |
| EOSINOPHIL          | 15   | 0.348682 | 0.992838 | 0.4766355 | 0.5123928   | 0.989      | 3196        |
| TH2                 | 25   | 0.290964 | 0.953034 | 0.5333334 | 0.55732137  | 0.995      | 1433        |
| MACROPHAGES         | 20   | 0.250498 | 0.774634 | 0.803132  | 0.8216028   | 1          | 4559        |
