# Supplementary material for: Neoantigen load and HLA-class I expression identify a subgroup of tumors with a T-cell-inflamed phenotype and favorable prognosis in homologous recombination-proficient high-grade serous ovarian carcinoma
Source: PubMed Central journal article supplement — J Immunother Cancer. 2020 May 26;8(1):e000375. doi: 10.1136/jitc-2019-000375 (PMC7254153; doi:10.1136/jitc-2019-000375), 2020-05-26
Supplement: jitc-2019-000375supp012.pdf [file jitc-2019-000375supp012.pdf]

**Supplementary Table S10. GSEA between HR-proficient and HR-deficient patients using Hallmark gene sets**

| NAME                                       | SIZE | ES       | NES      | NOM p-val  | FDR q-val | FWER p-val | RANK AT MAX |
|--------------------------------------------|------|----------|----------|------------|-----------|------------|-------------|
| HALLMARK_ALLOGRAFT_REJECTION               | 200  | 0.622244 | 3.030932 | p<0.001    | q<0.001   | p<0.001    | 2804        |
| HALLMARK_INTERFERON_GAMMA_RESPONSE         | 198  | 0.522191 | 2.541706 | p<0.001    | q<0.001   | p<0.001    | 3333        |
| HALLMARK_INFLAMMATORY_RESPONSE             | 200  | 0.508114 | 2.501526 | p<0.001    | q<0.001   | p<0.001    | 2686        |
| HALLMARK_MYC_TARGETS_V1                    | 194  | 0.498022 | 2.422014 | p<0.001    | q<0.001   | p<0.001    | 5781        |
| HALLMARK_INTERFERON_ALPHA_RESPONSE         | 97   | 0.537586 | 2.313169 | p<0.001    | q<0.001   | p<0.001    | 3911        |
| HALLMARK_IL6_JAK_STAT3_SIGNALING           | 87   | 0.522451 | 2.20156  | p<0.001    | q<0.001   | p<0.001    | 2686        |
| HALLMARK_COMPLEMENT                        | 200  | 0.444456 | 2.166893 | p<0.001    | q<0.001   | p<0.001    | 2249        |
| HALLMARK_TNFA_SIGNALING_VIA_NFKB           | 200  | 0.443547 | 2.143211 | p<0.001    | q<0.001   | p<0.001    | 3238        |
| HALLMARK_G2M_CHECKPOINT                    | 190  | 0.435133 | 2.089654 | p<0.001    | q<0.001   | p<0.001    | 5429        |
| HALLMARK_E2F_TARGETS                       | 191  | 0.414978 | 2.01675  | p<0.001    | 2.19E-04  | 0.001      | 5393        |
| HALLMARK_MYC_TARGETS_V2                    | 58   | 0.438354 | 1.732887 | p<0.001    | 0.0016784 | 0.008      | 5590        |
| HALLMARK_IL2_STAT5_SIGNALING               | 194  | 0.337152 | 1.63825  | p<0.001    | 0.0045694 | 0.025      | 2861        |
| HALLMARK_PI3K_AKT_MTOR_SIGNALING           | 104  | 0.358914 | 1.597204 | 0.0056338  | 0.0073102 | 0.044      | 3423        |
| HALLMARK_APOPTOSIS                         | 161  | 0.312838 | 1.482176 | 0.00626959 | 0.022153  | 0.137      | 3905        |
| HALLMARK_REACTIVE_OXIGEN_SPECIES_PATHWAY   | 48   | 0.380937 | 1.4659   | 0.03314917 | 0.0233678 | 0.153      | 2459        |
| HALLMARK_KRAS_SIGNALING_UP                 | 199  | 0.299018 | 1.460644 | p<0.001    | 0.0229204 | 0.16       | 2608        |
| HALLMARK_OXIDATIVE_PHOSPHORYLATION         | 197  | 0.272274 | 1.330157 | 0.01027397 | 0.0706416 | 0.438      | 4181        |
| HALLMARK_COAGULATION                       | 137  | 0.260257 | 1.220139 | 0.07878788 | 0.1733912 | 0.791      | 1702        |
| HALLMARK_DNA_REPAIR                        | 147  | 0.247311 | 1.174153 | 0.10882353 | 0.2398938 | 0.893      | 4568        |
| HALLMARK_UV_RESPONSE_UP                    | 158  | 0.245822 | 1.162933 | 0.1122449  | 0.2493061 | 0.912      | 3564        |
| HALLMARK_KRAS_SIGNALING_DN                 | 196  | 0.232412 | 1.134471 | 0.14238411 | 0.2949849 | 0.949      | 3514        |
| HALLMARK_ANDROGEN_RESPONSE                 | 100  | 0.247587 | 1.105498 | 0.25364432 | 0.351067  | 0.976      | 3445        |
| HALLMARK_MTORC1_SIGNALING                  | 197  | 0.225457 | 1.097002 | 0.2262295  | 0.3565137 | 0.983      | 5235        |
| HALLMARK_P53_PATHWAY                       | 195  | 0.217473 | 1.064597 | 0.278481   | 0.4297995 | 0.988      | 3988        |
| HALLMARK_TGF_BETA_SIGNALING                | 54   | 0.269342 | 1.058118 | 0.33894232 | 0.4297766 | 0.991      | 2964        |
| HALLMARK_APICAL_JUNCTION                   | 199  | 0.21358  | 1.045938 | 0.30546623 | 0.4500817 | 0.994      | 2759        |
| HALLMARK_HYPOXIA                           | 199  | 0.211872 | 1.038653 | 0.31       | 0.4568103 | 0.994      | 3033        |
| HALLMARK_UNFOLDED_PROTEIN_RESPONSE         | 113  | 0.227644 | 1.027796 | 0.37677053 | 0.4722526 | 0.997      | 5441        |
| HALLMARK_SPERMATOGENESIS                   | 131  | 0.215144 | 0.996494 | 0.47277936 | 0.5526683 | 0.998      | 2540        |
| HALLMARK_ESTROGEN_RESPONSE_LATE            | 200  | 0.191971 | 0.943236 | 0.62776023 | 0.7089315 | 0.999      | 4465        |
| HALLMARK_MITOTIC_SPINDLE                   | 196  | 0.181154 | 0.884567 | 0.8244514  | 0.8738461 | 1          | 4235        |
| HALLMARK_HEME_METABOLISM                   | 195  | 0.179473 | 0.870569 | 0.8540146  | 0.8840687 | 1          | 4791        |
| HALLMARK_APICAL_SURFACE                    | 44   | 0.223865 | 0.855597 | 0.72048193 | 0.8920412 | 1          | 1836        |
| HALLMARK_PANCREAS_BETA_CELLS               | 40   | 0.226324 | 0.826192 | 0.7758621  | 0.9195237 | 1          | 3741        |
| HALLMARK_ADIPOGENESIS                      | 198  | 0.151698 | 0.734743 | 1          | 0.9745382 | 1          | 3080        |
| HALLMARK_BILE_ACID_METABOLISM              | 112  | -0.32504 | -1.34897 | 0.04400607 | 0.5122303 | 0.673      | 5504        |
| HALLMARK_CHOLESTEROL_HOMEOSTASIS           | 74   | -0.33715 | -1.33425 | 0.06354515 | 0.2949129 | 0.73       | 6912        |
| HALLMARK_NOTCH_SIGNALING                   | 32   | -0.33975 | -1.13255 | 0.25838926 | 1         | 1          | 4275        |
| HALLMARK_MYOGENESIS                        | 200  | -0.2348  | -1.06285 | 0.30666667 | 1         | 1          | 5229        |
| HALLMARK_WNT_BETA_CATENIN_SIGNALING        | 42   | -0.29613 | -1.04234 | 0.36464968 | 1         | 1          | 4663        |
| HALLMARK_PEROXISOME                        | 101  | -0.2433  | -1.00046 | 0.46103895 | 1         | 1          | 4866        |
| HALLMARK_EPITHELIAL_MESENCHYMAL_TRANSITION | 199  | -0.19122 | -0.87073 | 0.7878788  | 1         | 1          | 6931        |
| HALLMARK_XENOBIOTIC_METABOLISM             | 199  | -0.19103 | -0.866   | 0.78986585 | 1         | 1          | 4866        |
| HALLMARK_UV_RESPONSE_DN                    | 140  | -0.19785 | -0.8514  | 0.81316996 | 1         | 1          | 6271        |
| HALLMARK_ANGIOGENESIS                      | 36   | -0.24082 | -0.82929 | 0.7387687  | 1         | 1          | 7038        |
| HALLMARK_HEDGEHOG_SIGNALING                | 36   | -0.24365 | -0.82709 | 0.7635468  | 1         | 1          | 4460        |
| HALLMARK_PROTEIN_SECRETION                 | 96   | -0.19922 | -0.8128  | 0.83572567 | 1         | 1          | 3948        |
| HALLMARK_FATTY_ACID_METABOLISM             | 155  | -0.18026 | -0.78794 | 0.9180088  | 1         | 1          | 6781        |
| HALLMARK_GLYCOLYSIS                        | 198  | -0.16665 | -0.75184 | 0.9799139  | 1         | 1          | 5428        |
| HALLMARK_ESTROGEN_RESPONSE_EARLY           | 196  | -0.16022 | -0.714   | 0.9927954  | 0.9768313 | 1          | 5431        |
